# Supplementary material
Source: PubMed Central journal article supplement (PMC4785506)
Supplement: ct5b01047_si_001.pdf [file ct5b01047_si_001.pdf]

# Supporting information for: Semiempirical Quantum-Chemical Orthogonalization-Corrected Methods: Benchmarking for Ground-State Properties

Pavlo O. Dral, Xin Wu, Lasse Spörkel, Axel Koslowski, and Walter Thiel\*

*Max-Planck-Institut für Kohlenforschung, Kaiser-Wilhelm-Platz 1,  
45470 Mülheim an der Ruhr, Germany*

E-mail: thiel@kofo.mpg.de

## Contents

|          |                                                                                                              |            |
|----------|--------------------------------------------------------------------------------------------------------------|------------|
| <b>1</b> | <b>Conversion of Semiempirical Heats of Formation to Relative ZPVE-Exclusive Energies</b>                    | <b>S6</b>  |
| 1.1      | Conversion of Semiempirical Atomization Enthalpies at 298 K to ZPVE-Exclusive Atomization Energies . . . . . | S7         |
| 1.2      | Conversion of Other Relative Energies . . . . .                                                              | S9         |
| <b>2</b> | <b>Tables: Additional Statistical Evaluations Not Included in the Main Text</b>                              | <b>S10</b> |
| <b>3</b> | <b>Tables: Numerical Results for Individual Molecules and Properties</b>                                     | <b>S18</b> |

---

\*To whom correspondence should be addressed

|          |                                                                                                                  |             |
|----------|------------------------------------------------------------------------------------------------------------------|-------------|
| <b>4</b> | <b>Figures: Error Distributions and Reference and Optimized SQC Geometries of Selected Noncovalent Complexes</b> | <b>S294</b> |
| <b>5</b> | <b>Additional Statistical Evaluations for RM1</b>                                                                | <b>S301</b> |
|          | <b>References</b>                                                                                                | <b>S309</b> |

## List of Tables

|    |                                                                                                                                                                                                                                                                    |     |
|----|--------------------------------------------------------------------------------------------------------------------------------------------------------------------------------------------------------------------------------------------------------------------|-----|
| S1 | Mean Absolute Errors in Calculated Heats of Formation (kcal/mol), Relative Energies (kcal/mol), Ionization Potentials (eV), Barriers (kcal/mol), Bond Lengths (Å), and Bond Angles (degree) for the OVS7-CHNOF Benchmark Set at the $OMx-Dn$ Methods . . . . .     | S10 |
| S2 | Mean Absolute Errors in Calculated Heats of Formation (kcal/mol) and Relative Energies (kcal/mol) for the G2G3-CHNOF Benchmark Set at the $OMx-Dn$ Methods . . . . .                                                                                               | S11 |
| S3 | Mean Absolute Errors in Calculated Heats of Formation (kcal/mol), Bond Lengths (Å), Bond Angles (degree), Dihedral Angles (degree), Ionization Potentials (eV), and Dipole Moments (D) for the PDDG Benchmark Set and Its Subsets: $OMx-Dn$ Methods . . . . .      | S12 |
| S4 | Mean Absolute Errors in Calculated Heats of Formation (kcal/mol), Bond Lengths (Å), Bond Angles (degree), Dihedral Angles (degree), Ionization Potentials (eV), and Dipole Moments (D) for the PM7-CHNOF Benchmark Set and Its Subsets: $OMx-Dn$ methods . . . . . | S13 |

|     |                                                                                                                                                                                                                                                                                                              |     |
|-----|--------------------------------------------------------------------------------------------------------------------------------------------------------------------------------------------------------------------------------------------------------------------------------------------------------------|-----|
| S5  | Mean Absolute Errors of the Interaction Energies (kcal/mol) for the A24-CHNOF, S22, S66, S66a8, JSCH-2005-CHNOF, S7L, and S30L-CHNOF Sets and of the Folding Enthalpies and Energies (kcal/mol) for the AF6 Set, Calculated at the Reference Geometries Using MNDO, AM1, PM3, PM6, and OM <i>x</i> . . . . . | S14 |
| S6  | Mean Absolute Errors in Selected Interatomic Distances (Å) and Angles (degree) for the A24-CHNOF, S66, S7L, and AF6 Benchmark Sets for Geometries Optimized with MNDO, AM1, PM3, PM6, and OM <i>x</i> . . . . .                                                                                              | S15 |
| S7  | Mean Absolute Errors of the Interaction Energies (kcal/mol) for the A24-CHNOF, S66, and S7L and of the Folding Enthalpies and Energies (kcal/mol) for the AF6 Set, Calculated at the SQC Geometries Using MNDO, AM1, PM3, PM6, and OM <i>x</i> . . . . .                                                     | S16 |
| S8  | Mean Absolute Errors of the Interaction Energies (kcal/mol) for the A24-CHNOF, S66, S7L and of the Folding Enthalpies and Energies (kcal/mol) for the AF6 Set, Calculated at the SQC Geometries Using PM7 and OM <i>x</i> -D <i>n</i> . . . . .                                                              | S17 |
| S9  | Benchmark Results for Radicals71 Subset of OVS7-CHNOF Data Set . . . . .                                                                                                                                                                                                                                     | S19 |
| S10 | Benchmark Results for Anions24 Subset of OVS7-CHNOF Data Set . . . . .                                                                                                                                                                                                                                       | S21 |
| S11 | Benchmark Results for Cations41 Subset of OVS7-CHNOF Data Set . . . . .                                                                                                                                                                                                                                      | S22 |
| S12 | Benchmark Results for BIGMOL20 Subset of OVS7-CHNOF Data Set . . . . .                                                                                                                                                                                                                                       | S24 |
| S13 | Benchmark Results for Conformers30 Subset of OVS7-CHNOF Data Set . . . . .                                                                                                                                                                                                                                   | S25 |
| S14 | Benchmark Results for Isomers44 Subset of OVS7-CHNOF Data Set . . . . .                                                                                                                                                                                                                                      | S26 |
| S15 | Benchmark Results for Fluorine91 Subset of OVS7-CHNOF Data Set . . . . .                                                                                                                                                                                                                                     | S28 |
| S16 | Benchmark Results for G2 Subset of G2G3-CHNOF Data Set . . . . .                                                                                                                                                                                                                                             | S31 |
| S17 | Benchmark Results for G3 Subset of G2G3-CHNOF Data Set . . . . .                                                                                                                                                                                                                                             | S35 |
| S18 | Benchmark Results for Alkanes28 Subset of G2G3-CHNOF Data Set . . . . .                                                                                                                                                                                                                                      | S37 |
| S19 | Benchmark Results for the W4-11-CHNOF Data Set . . . . .                                                                                                                                                                                                                                                     | S38 |
| S20 | Benchmark Results for the GMTKN30-CHNOF Data Set . . . . .                                                                                                                                                                                                                                                   | S63 |

|     |                                                                                                                                                                                                                                                                                      |      |
|-----|--------------------------------------------------------------------------------------------------------------------------------------------------------------------------------------------------------------------------------------------------------------------------------------|------|
| S21 | Benchmark Results for the CE345-CHNOF Data Set . . . . .                                                                                                                                                                                                                             | S78  |
| S22 | Benchmark Results for the PDDG Data Set. Heats of Formation . . . . .                                                                                                                                                                                                                | S84  |
| S23 | Benchmark Results for the PDDG Data Set. Ionization Potentials . . . . .                                                                                                                                                                                                             | S99  |
| S24 | Benchmark Results for the PM7-CHNOF Data Set. Heats of Formation . . .                                                                                                                                                                                                               | S102 |
| S25 | Benchmark Results for the PM7-CHNOF Data Set. Ionization Potentials . .                                                                                                                                                                                                              | S129 |
| S26 | Benchmark Results for the C7H10O2 Data Set . . . . .                                                                                                                                                                                                                                 | S132 |
| S27 | Benchmark Results for the A24-CHNOF Data Set . . . . .                                                                                                                                                                                                                               | S268 |
| S28 | Benchmark Results for the S66 Data Set . . . . .                                                                                                                                                                                                                                     | S270 |
| S29 | Benchmark Results for the S66a8 Data Set . . . . .                                                                                                                                                                                                                                   | S275 |
| S30 | Benchmark Results for the JSCH-2005-CHNOF Data Set . . . . .                                                                                                                                                                                                                         | S287 |
| S31 | Benchmark Results for the S7L Data Set . . . . .                                                                                                                                                                                                                                     | S291 |
| S32 | Benchmark Results for the S30L-CHNOF Data Set . . . . .                                                                                                                                                                                                                              | S292 |
| S33 | Benchmark Results for the AF6 Data Set . . . . .                                                                                                                                                                                                                                     | S293 |
| S34 | Mean Absolute Errors in Calculated Heats of Formation (kcal/mol), Relative<br>Energies (kcal/mol), Ionization Potentials (eV), Barriers (kcal/mol), Bond<br>Lengths (Å), and Bond Angles (degree) for the OVS7-CHNOF Benchmark<br>Set: MNDO, AM1, RM1, PM $x$ , and OM $x$ . . . . . | S302 |
| S35 | Mean Absolute Errors in Calculated Heats of Formation (kcal/mol) and Rel-<br>ative Energies (kcal/mol) for the G2G3-CHNOF Benchmark Set: MNDO,<br>AM1, RM1, PM $x$ , and OM $x$ . . . . .                                                                                            | S303 |
| S36 | Mean Absolute Errors in Calculated Atomization and Reaction Energies (kcal/mol)<br>for the W4-11-CHNOF Benchmark Set: MNDO, AM1, RM1, PM $x$ , and OM $x^a$                                                                                                                          | S303 |
| S37 | Mean Absolute Errors (kcal/mol) for the GMTKN30-CHNOF Benchmark Set:<br>MNDO, AM1, RM1, PM $x$ , and OM $x^a$ . . . . .                                                                                                                                                              | S304 |
| S38 | Mean Absolute Errors (kcal/mol) for the CE345-CHNOF Benchmark Set:<br>MNDO, AM1, RM1, PM $x$ , and OM $x^a$ . . . . .                                                                                                                                                                | S305 |

|     |                                                                                                                                                                                                                                                                                       |      |
|-----|---------------------------------------------------------------------------------------------------------------------------------------------------------------------------------------------------------------------------------------------------------------------------------------|------|
| S39 | Mean Absolute Errors in Calculated Heats of Formation (kcal/mol), Bond Lengths (Å), Bond Angles (degree), Dihedral Angles (degree), Ionization Potentials (eV), and Dipole Moments (D) for the PDDG Benchmark Set and Its Subsets: MNDO, AM1, RM1, PM $x$ , and OM $x$ . . . . .      | S306 |
| S40 | Mean Absolute Errors in Calculated Heats of Formation (kcal/mol), Bond Lengths (Å), Bond Angles (degree), Dihedral Angles (degree), Ionization Potentials (eV), and Dipole Moments (D) for the PM7-CHNOF Benchmark Set and Its Subsets: MNDO, AM1, RM1, PM $x$ , and OM $x$ . . . . . | S307 |
| S41 | Mean Absolute Errors in Calculated Atomization Enthalpies at 298 K (kcal/mol) for the C7H10O2 Benchmark Set . . . . .                                                                                                                                                                 | S308 |

## List of Figures

|    |                                                                                                                                                            |      |
|----|------------------------------------------------------------------------------------------------------------------------------------------------------------|------|
| S1 | Error Distribution of Ground-State Properties Calculated at the OM $x$ and PM7 Levels of Theory for the GMTKN30-CHNOF Benchmark Set . . . . .              | S295 |
| S2 | Reference, OM $x$ -D $n$ , and PM7 Geometry of the HF Dimer from the A24 Benchmark Set . . . . .                                                           | S296 |
| S3 | Reference, OM2, OM3, OM $x$ -D $n$ , and PM7 Geometries of the Benzene $\cdots$ AcOH (OH- $\pi$ ) Complex from the S66 Benchmark Set . . . . .             | S296 |
| S4 | Reference, OM $x$ -D $n$ , and PM7 Geometries of the H <sub>2</sub> O $\cdots$ MeOH Complex from the S66 Benchmark Set . . . . .                           | S297 |
| S5 | Reference, OM $x$ -D $n$ , and PM7 Geometries of the C <sub>6</sub> H <sub>6</sub> $\cdots$ MeNH <sub>2</sub> Complex from the S66 Benchmark Set . . . . . | S298 |
| S6 | Reference, OM $x$ -D $n$ , and PM7 Geometries of the Peptide $\cdots$ Peptide Complex from the S66 Benchmark Set . . . . .                                 | S299 |
| S7 | Reference, OM $x$ -D $n$ , and PM7 Geometries of the T-Shaped Pyridine Dimer from the S66 Benchmark Set . . . . .                                          | S300 |

# 1 Conversion of Semiempirical Heats of Formation to Relative ZPVE-Exclusive Energies

MNDO-based and OM*x* semiempirical quantum chemistry (SQC) methods are parametrized to reproduce experimental heats of formations at 298 K, whereas *ab initio* and DFT methods provide total electronic energies  $E_{tot}$  as primary results.

Semiempirical heats of formation  $\Delta H_{f, 298 \text{ K}}$  at 298 K are calculated as:<sup>S1</sup>

$$\Delta H_{f, 298 \text{ K}} = \sum_A^{N_{at}} \Delta H_{f, 298 \text{ K}}(A) - E_{at, 298 \text{ K}}^{\text{SQC-SCF}} \quad (1)$$

where  $N_{at}$  is the number of atoms in a molecule,  $\Delta H_{f, 298 \text{ K}}(A)$  denotes the experimental heats of formation of the constituent atoms at 298 K, and  $E_{at, 298 \text{ K}}^{\text{SQC-SCF}}$  is the atomization “energy” calculated from the total energies of the molecule and the constituent atoms at the same SQC level of theory. Zero-point vibrational energies (ZPVE) and thermal corrections are not calculated explicitly, but are assumed to be implicitly included in the  $E_{at, 298 \text{ K}}^{\text{SQC-SCF}}$  term calculated at the SCF level.

This convention will introduce errors when the resulting SQC heats of formation are used to calculate relative energies, *e.g.* for comparison with *ab initio* and DFT results. These errors will normally remain small for the relative energies of species of similar size, because the ZPVE and thermal corrections will tend to cancel when comparing similar species. This is no longer true for “absolute” energies like atomization energies, for which the corrections do not cancel and can become very large for medium-size and big molecules. For fair comparisons, it is then mandatory to convert the SQC heats of formation (*i.e.* atomization enthalpies at 298 K) to “true” atomization energies. Below we provide a detailed description of the approach used for this purpose.

## 1.1 Conversion of Semiempirical Atomization Enthalpies at 298 K to ZPVE-Exclusive Atomization Energies

The atomization enthalpy  $\Delta H_{at, 298 \text{ K}}$  at 298 K and the ZPVE-exclusive atomization energy  $\Delta E_{at}$  at 0 K are defined by Eqs. 2 and 3, respectively:

$$\Delta H_{at, 298 \text{ K}} = \sum_A^{N_{at}} \Delta H_{f, 298 \text{ K}}(A) - \Delta H_{f, 298 \text{ K}} \quad (2)$$

$$\Delta E_{at} = \sum_A^{N_{at}} E_{tot}(A) - E_{tot} \quad (3)$$

where  $E_{tot}$  is the standard total energy (without any corrections).

As can be seen by comparing Eqs. 1 and 2, the semiempirical conventions in the MNDO-based and OM*x* methods imply that the SCF atomization “energy” represents the atomization enthalpy at 298 K:

$$E_{at, 298 \text{ K}}^{\text{SQC-SCF}} = \Delta H_{at, 298 \text{ K}} \quad (4)$$

To convert the latter property to  $\Delta E_{at}$  we need to remove the thermal and ZPVE corrections. Considering the thermal corrections first, the atomization enthalpy at a given temperature  $T$  is given by:

$$\Delta H_{at, T} = \sum_A^{N_{at}} H_T(A) - H_T \quad (5)$$

The atomization enthalpies at  $T = 0 \text{ K}$  and  $T = 298 \text{ K}$  are thus related by:

$$\Delta H_{at, 0 \text{ K}} = \Delta H_{at, 298 \text{ K}} + \Delta H_{298-0} - \Delta H_{298-0}^{atoms} \quad (6)$$

where  $\Delta H_{298-0}$  is the thermal correction for the enthalpy of the molecule and  $\Delta H_{298-0}^{atoms}$  is the sum of the corresponding corrections for the constituent atoms. These terms are evaluated

as follows (with  $T_{298} = 298.15$  K):

$$\Delta H_{298-0} = E_{trans, T_{298}} + E_{rot, T_{298}} + E_{vib, T_{298}} + RT_{298} \quad (7)$$

$$\Delta H_{298-0}^{atoms} = N_{at} (E_{trans, 298 \text{ K}} + RT_{298}) \quad (8)$$

using the classical limits for translation and rotation and the harmonic oscillator approximation for the vibrational contribution.

The conversion from  $\Delta H_{at, 0 \text{ K}}$  to  $\Delta E_{at}$  is accomplished by removing the ZPVE contribution, which is again computed in the harmonic oscillator approximation:

$$\Delta E_{at} = \Delta H_{at, 0 \text{ K}} + \text{ZPVE} \quad (9)$$

For fair comparison of various methods it is common practice to perform single-point calculations on reference geometries, which we also do for benchmarking atomization energies at the SQC levels of theory. To correct the semiempirical atomization enthalpies  $\Delta H_{at, 298 \text{ K}}$  at 298 K to ZPVE-exclusive atomization energies  $\Delta E_{at}$  at 0 K as described above, we calculate all necessary ZPVE and thermal corrections using the rigid-rotor harmonic-oscillator approximation at geometries optimized at the corresponding SQC level of theory:

$$\begin{aligned} \Delta E_{at}^{SP} &= \Delta H_{at, 298 \text{ K}}^{SP} + \Delta E_{at}^{Opt} - \Delta H_{at, 298 \text{ K}}^{Opt} \\ &= \Delta H_{at, 298 \text{ K}}^{SP} + \Delta H_{at, 0 \text{ K}}^{Opt} + \text{ZPVE}^{Opt} - \Delta H_{at, 298 \text{ K}}^{Opt} \\ &= \Delta H_{at, 298 \text{ K}}^{SP} + \left( \Delta H_{at, 0 \text{ K}}^{Opt} - \Delta H_{at, 298 \text{ K}}^{Opt} \right) + \text{ZPVE}^{Opt} \end{aligned} \quad (10)$$



## 1.2 Conversion of Other Relative Energies

Corrected relative energies, *e.g.* reaction energies, can simply be calculated from the corresponding atomization energies as they are related through Eq. 3. For a reaction

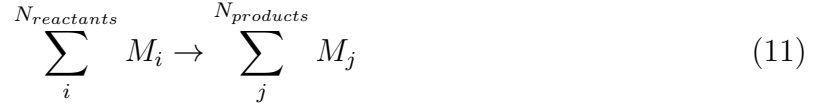

the reaction enthalpy at 298.15 K (as obtained from SQC-SCF heats of formation) and the ZPVE-exclusive energy are given by, respectively:

$$\Delta H_{r, 298 \text{ K}} = \sum_j^{N_{\text{products}}} \Delta H_{f, 298 \text{ K}}(M_j) - \sum_i^{N_{\text{reactants}}} \Delta H_{f, 298 \text{ K}}(M_i) \quad (12)$$

$$\Delta E_r = \sum_j^{N_{\text{products}}} E_{\text{tot}}(M_j) - \sum_i^{N_{\text{reactants}}} E_{\text{tot}}(M_i) \quad (13)$$

To calculate the ZPVE-exclusive energy at the SQC level it is sufficient to know the corresponding ZPVE-exclusive atomization energies obtained as described above:

$$\begin{aligned} \Delta E_r &= \sum_j^{N_{\text{products}}} E_{\text{tot}}(M_j) - \sum_i^{N_{\text{reactants}}} E_{\text{tot}}(M_i) \\ &= \sum_j^{N_{\text{products}}} \left[ \sum_A^{N_{\text{at}}(M_j)} E_{\text{tot}}(A) - \Delta E_{\text{at}}(M_j) \right] \\ &\quad - \sum_i^{N_{\text{reactants}}} \left[ \sum_A^{N_{\text{at}}(M_i)} E_{\text{tot}}(A) - \Delta E_{\text{at}}(M_i) \right] \\ &= \sum_A^{N_{\text{at, all}}} E_{\text{tot}}(A) - \sum_j^{N_{\text{products}}} \Delta E_{\text{at}}(M_j) \\ &\quad - \sum_A^{N_{\text{at, all}}} E_{\text{tot}}(A) + \sum_i^{N_{\text{reactants}}} \Delta E_{\text{at}}(M_i) \\ &= - \left[ \sum_j^{N_{\text{products}}} \Delta E_{\text{at}}(M_j) - \sum_i^{N_{\text{reactants}}} \Delta E_{\text{at}}(M_i) \right] \end{aligned} \quad (14)$$

## 2 Tables: Additional Statistical Evaluations Not Included in the Main Text

Table S1: Mean Absolute Errors in Calculated Heats of Formation (kcal/mol), Relative Energies (kcal/mol), Ionization Potentials (eV), Barriers (kcal/mol), Bond Lengths (Å), and Bond Angles (degree) for the OVS7-CHNOF Benchmark Set at the OM*x*-D*n* Methods

| Subset                | N   | Method |       |       |       |       |       |
|-----------------------|-----|--------|-------|-------|-------|-------|-------|
|                       |     | OM2    |       |       | OM3   |       |       |
|                       |     | D2     | D3    | D3T   | D2    | D3    | D3T   |
| Heats of formation    |     |        |       |       |       |       |       |
| Radicals71            | 42  | 5.65   | 5.72  | 5.72  | 6.03  | 6.96  | 6.96  |
| Anions24              | 24  | 9.01   | 9.11  | 9.11  | 10.03 | 11.63 | 11.63 |
| Cations41             | 36  | 7.69   | 7.80  | 7.80  | 6.89  | 7.22  | 7.22  |
| BIGMOL20              | 20  | 8.81   | 9.47  | 9.47  | 6.43  | 13.62 | 13.62 |
| Conformers30          | 11  | 7.05   | 6.59  | 6.56  | 4.17  | 9.84  | 9.80  |
| Isomers44             | 27  | 4.88   | 4.77  | 4.75  | 4.29  | 7.82  | 7.80  |
| Fluorine91            | 91  | 7.59   | 7.59  | 7.59  | 7.29  | 7.49  | 7.49  |
| Relative energies     |     |        |       |       |       |       |       |
| Radicals71            | 4   | 3.94   | 3.95  | 3.95  | 5.43  | 5.46  | 5.46  |
| Cations41             | 5   | 3.65   | 3.69  | 3.69  | 3.50  | 3.54  | 3.54  |
| Isomers44             | 17  | 0.82   | 0.70  | 0.69  | 1.50  | 1.64  | 1.65  |
| Ionization potentials |     |        |       |       |       |       |       |
| Radicals71            | 25  | 0.37   | 0.36  | 0.36  | 0.53  | 0.53  | 0.53  |
| Barriers              |     |        |       |       |       |       |       |
| Conformers30          | 19  | 1.39   | 1.33  | 1.32  | 1.49  | 1.45  | 1.44  |
| Bond lengths          |     |        |       |       |       |       |       |
| Fluorine91            | 455 | 0.017  | 0.016 | 0.016 | 0.022 | 0.022 | 0.022 |
| Bond angles           |     |        |       |       |       |       |       |
| Fluorine91            | 355 | 2.00   | 2.03  | 2.03  | 1.76  | 1.78  | 1.78  |

Table S2: Mean Absolute Errors in Calculated Heats of Formation (kcal/mol) and Relative Energies (kcal/mol) for the G2G3-CHNOF Benchmark Set at the  $OMx-Dn$  Methods

| Subset             | N  | Method |      |      |      |       |       |
|--------------------|----|--------|------|------|------|-------|-------|
|                    |    | OM2    |      |      | OM3  |       |       |
|                    |    | D2     | D3   | D3T  | D2   | D3    | D3T   |
| Heats of formation |    |        |      |      |      |       |       |
| G2                 | 93 | 3.98   | 4.01 | 4.01 | 4.17 | 5.04  | 5.04  |
| G3                 | 52 | 6.25   | 6.31 | 6.30 | 5.32 | 9.26  | 9.24  |
| Alkanes28          | 22 | 10.01  | 9.25 | 9.24 | 9.00 | 15.77 | 15.76 |
| Relative energies  |    |        |      |      |      |       |       |
| Alkanes28          | 6  | 0.24   | 0.21 | 0.21 | 0.74 | 0.88  | 0.90  |

Table S3: Mean Absolute Errors in Calculated Heats of Formation (kcal/mol), Bond Lengths (Å), Bond Angles (degree), Dihedral Angles (degree), Ionization Potentials (eV), and Dipole Moments (D) for the PDDG Benchmark Set and Its Subsets: OM $x$ -D $n$  Methods

| Subset                | N   | Method |       |       |       |       |       |
|-----------------------|-----|--------|-------|-------|-------|-------|-------|
|                       |     | OM2    |       |       | OM3   |       |       |
|                       |     | D2     | D3    | D3T   | D2    | D3    | D3T   |
| Heats of formation    |     |        |       |       |       |       |       |
| Overall               | 622 | 7.98   | 7.75  | 7.83  | 6.10  | 10.76 | 10.73 |
| CH                    | 254 | 8.34   | 7.92  | 8.16  | 6.34  | 11.96 | 11.92 |
| CHN                   | 89  | 5.97   | 6.31  | 6.30  | 4.92  | 8.98  | 8.97  |
| CHO                   | 238 | 8.80   | 8.52  | 8.49  | 6.62  | 10.92 | 10.89 |
| CHNO                  | 41  | 5.38   | 5.30  | 5.29  | 4.12  | 6.23  | 6.22  |
| Bond lengths          |     |        |       |       |       |       |       |
| Overall               | 153 | 0.014  | 0.014 | 0.015 | 0.018 | 0.017 | 0.017 |
| CH                    | 81  | 0.011  | 0.011 | 0.012 | 0.010 | 0.010 | 0.010 |
| CHN                   | 34  | 0.015  | 0.015 | 0.015 | 0.025 | 0.025 | 0.025 |
| CHO                   | 35  | 0.020  | 0.020 | 0.020 | 0.026 | 0.026 | 0.026 |
| CHNO                  | 3   | 0.027  | 0.027 | 0.027 | 0.044 | 0.044 | 0.044 |
| C-H                   | 38  | 0.010  | 0.010 | 0.010 | 0.013 | 0.013 | 0.013 |
| C-C                   | 52  | 0.010  | 0.010 | 0.012 | 0.010 | 0.010 | 0.010 |
| C=C                   | 15  | 0.009  | 0.009 | 0.009 | 0.010 | 0.009 | 0.009 |
| C≡C                   | 5   | 0.019  | 0.019 | 0.019 | 0.025 | 0.025 | 0.025 |
| N-C                   | 7   | 0.018  | 0.018 | 0.018 | 0.018 | 0.018 | 0.018 |
| N-H                   | 4   | 0.007  | 0.007 | 0.007 | 0.044 | 0.044 | 0.044 |
| N≡C                   | 5   | 0.017  | 0.017 | 0.017 | 0.046 | 0.046 | 0.046 |
| O-H                   | 6   | 0.037  | 0.037 | 0.037 | 0.057 | 0.057 | 0.057 |
| O-C                   | 7   | 0.018  | 0.018 | 0.018 | 0.022 | 0.022 | 0.022 |
| O=C                   | 9   | 0.015  | 0.015 | 0.015 | 0.019 | 0.018 | 0.018 |
| Bond angles           |     |        |       |       |       |       |       |
| Overall               | 54  | 2.18   | 2.17  | 2.17  | 1.91  | 1.91  | 1.91  |
| CH                    | 20  | 1.43   | 1.40  | 1.40  | 1.02  | 1.00  | 1.00  |
| CHN                   | 12  | 1.27   | 1.28  | 1.28  | 1.29  | 1.31  | 1.31  |
| CHO                   | 21  | 3.07   | 3.07  | 3.07  | 2.74  | 2.75  | 2.75  |
| ∠CCH                  | 16  | 1.04   | 1.03  | 1.03  | 1.01  | 1.01  | 1.01  |
| ∠CCC                  | 13  | 1.86   | 1.82  | 1.82  | 1.30  | 1.26  | 1.26  |
| ∠OCH                  | 3   | 3.03   | 3.04  | 3.04  | 3.01  | 3.03  | 3.03  |
| ∠COH                  | 3   | 2.76   | 2.73  | 2.73  | 3.25  | 3.18  | 3.18  |
| ∠OCC                  | 5   | 2.58   | 2.58  | 2.58  | 1.76  | 1.79  | 1.79  |
| Dihedral angles       |     |        |       |       |       |       |       |
| Overall               | 6   | 8.62   | 8.56  | 16.10 | 5.91  | 5.81  | 5.81  |
| CH (∠CCCC)            | 3   | 6.06   | 6.04  | 21.10 | 5.50  | 5.50  | 5.50  |
| Ionization potentials |     |        |       |       |       |       |       |
| Overall               | 97  | 0.37   | 0.37  | 0.38  | 0.60  | 0.60  | 0.60  |
| CH                    | 41  | 0.35   | 0.35  | 0.36  | 0.57  | 0.57  | 0.57  |
| CHN                   | 21  | 0.29   | 0.29  | 0.29  | 0.44  | 0.44  | 0.44  |
| CHO                   | 31  | 0.42   | 0.42  | 0.42  | 0.75  | 0.75  | 0.75  |
| CHNO                  | 4   | 0.66   | 0.66  | 0.66  | 0.66  | 0.66  | 0.66  |
| Dipole moments        |     |        |       |       |       |       |       |
| Overall               | 47  | 0.27   | 0.27  | 0.27  | 0.25  | 0.25  | 0.25  |
| CH                    | 10  | 0.11   | 0.11  | 0.11  | 0.11  | 0.11  | 0.11  |
| CHN                   | 14  | 0.24   | 0.25  | 0.25  | 0.30  | 0.30  | 0.30  |
| CHO                   | 20  | 0.34   | 0.34  | 0.34  | 0.27  | 0.27  | 0.27  |
| CHNO                  | 3   | 0.44   | 0.44  | 0.44  | 0.41  | 0.41  | 0.41  |

Table S4: Mean Absolute Errors in Calculated Heats of Formation (kcal/mol), Bond Lengths (Å), Bond Angles (degree), Dihedral Angles (degree), Ionization Potentials (eV), and Dipole Moments (D) for the PM7-CHNOF Benchmark Set and Its Subsets: OM $x$ -D $n$  methods

| Subset                | N    | Method |       |       |       |       |       |
|-----------------------|------|--------|-------|-------|-------|-------|-------|
|                       |      | OM2    |       |       | OM3   |       |       |
|                       |      | D2     | D3    | D3T   | D2    | D3    | D3T   |
| Heats of formation    |      |        |       |       |       |       |       |
| Overall               | 1168 | 11.22  | 11.12 | 11.07 | 8.44  | 15.13 | 15.07 |
| DA                    | 5    | 3.23   | 3.16  | 3.16  | 2.15  | 2.14  | 2.14  |
| CH                    | 310  | 14.91  | 14.34 | 14.25 | 11.05 | 20.23 | 20.12 |
| CHN                   | 214  | 9.01   | 9.25  | 9.23  | 7.83  | 14.18 | 14.15 |
| CHO                   | 373  | 11.57  | 11.52 | 11.48 | 8.23  | 14.46 | 14.42 |
| CHF                   | 32   | 6.16   | 6.12  | 6.11  | 3.57  | 6.16  | 6.16  |
| CHNO                  | 234  | 8.66   | 8.77  | 8.74  | 6.66  | 11.80 | 11.77 |
| Bond lengths          |      |        |       |       |       |       |       |
| Overall               | 175  | 0.015  | 0.015 | 0.015 | 0.019 | 0.019 | 0.019 |
| DA                    | 4    | 0.036  | 0.036 | 0.036 | 0.053 | 0.053 | 0.053 |
| CH                    | 74   | 0.011  | 0.011 | 0.011 | 0.011 | 0.011 | 0.011 |
| CHN                   | 31   | 0.014  | 0.014 | 0.014 | 0.020 | 0.020 | 0.020 |
| CHO                   | 31   | 0.016  | 0.016 | 0.016 | 0.021 | 0.021 | 0.021 |
| CHF                   | 18   | 0.016  | 0.016 | 0.016 | 0.020 | 0.020 | 0.020 |
| CHNO                  | 17   | 0.029  | 0.028 | 0.028 | 0.040 | 0.041 | 0.041 |
| Bond angles           |      |        |       |       |       |       |       |
| Overall               | 90   | 1.76   | 1.75  | 1.75  | 1.53  | 1.54  | 1.54  |
| CH                    | 32   | 0.94   | 0.92  | 0.92  | 0.54  | 0.53  | 0.53  |
| CHN                   | 20   | 1.41   | 1.43  | 1.43  | 1.30  | 1.32  | 1.32  |
| CHO                   | 20   | 2.31   | 2.33  | 2.33  | 1.95  | 1.98  | 1.98  |
| CHF                   | 11   | 1.47   | 1.47  | 1.47  | 1.13  | 1.11  | 1.11  |
| CHNO                  | 7    | 5.37   | 5.30  | 5.30  | 6.19  | 6.26  | 6.26  |
| Ionization potentials |      |        |       |       |       |       |       |
| Overall               | 104  | 0.33   | 0.33  | 0.33  | 0.53  | 0.53  | 0.53  |
| CH                    | 36   | 0.25   | 0.25  | 0.25  | 0.47  | 0.47  | 0.47  |
| CHN                   | 18   | 0.28   | 0.28  | 0.28  | 0.43  | 0.43  | 0.43  |
| CHO                   | 29   | 0.43   | 0.44  | 0.44  | 0.78  | 0.78  | 0.78  |
| CHF                   | 14   | 0.34   | 0.34  | 0.34  | 0.29  | 0.29  | 0.29  |
| CHNO                  | 5    | 0.47   | 0.47  | 0.47  | 0.55  | 0.55  | 0.55  |
| Dipole moments        |      |        |       |       |       |       |       |
| Overall               | 58   | 0.24   | 0.24  | 0.24  | 0.22  | 0.22  | 0.22  |
| CH                    | 10   | 0.12   | 0.12  | 0.12  | 0.12  | 0.12  | 0.12  |
| CHN                   | 17   | 0.25   | 0.25  | 0.25  | 0.30  | 0.30  | 0.30  |
| CHO                   | 20   | 0.29   | 0.28  | 0.28  | 0.23  | 0.23  | 0.23  |
| CHF                   | 10   | 0.25   | 0.25  | 0.25  | 0.16  | 0.16  | 0.16  |

Table S5: Mean Absolute Errors of the Interaction Energies (kcal/mol) for the A24-CHNOF, S22, S66, S66a8, JSCH-2005-CHNOF, S7L, and S30L-CHNOF Sets and of the Folding Enthalpies and Energies (kcal/mol) for the AF6 Set, Calculated at the Reference Geometries Using MNDO, AM1, PM3, PM6, and OM $x$

| Subset                         | N   | Method |       |       |       |       |       |       |
|--------------------------------|-----|--------|-------|-------|-------|-------|-------|-------|
|                                |     | MNDO   | AM1   | PM3   | PM6   | OM1   | OM2   | OM3   |
| A24-CHNOF                      |     |        |       |       |       |       |       |       |
| Overall* <sup>a</sup>          | 21  | 4.96   | 1.53  | 1.33  | 1.25  | 1.60  | 0.89  | 1.11  |
| Overall                        | 20  | 4.66   | 1.49  | 1.37  | 0.91  | 1.40  | 0.76  | 0.91  |
| H-bonded                       | 5   | 9.72   | 3.34  | 2.64  | 2.97  | 3.04  | 1.79  | 1.86  |
| H-bonded* <sup>a</sup>         | 4   | 9.42   | 3.60  | 3.19  | 1.69  | 2.37  | 1.39  | 1.05  |
| Mixed                          | 10  | 4.57   | 1.25  | 1.31  | 0.76  | 1.46  | 0.70  | 1.05  |
| Dispersion                     | 6   | 1.63   | 0.48  | 0.27  | 0.65  | 0.63  | 0.44  | 0.58  |
| S66                            |     |        |       |       |       |       |       |       |
| Overall                        | 66  | 13.54  | 5.18  | 4.33  | 2.70  | 4.19  | 2.66  | 3.11  |
| Electrostatic                  | 23  | 19.45  | 7.13  | 5.47  | 3.42  | 5.44  | 2.96  | 3.24  |
| Mixed                          | 20  | 9.74   | 3.56  | 3.18  | 2.03  | 3.18  | 1.82  | 2.50  |
| Dispersion                     | 23  | 10.94  | 4.64  | 4.19  | 2.57  | 3.82  | 3.10  | 3.52  |
| S66a8                          |     |        |       |       |       |       |       |       |
| Overall                        | 528 | 9.26   | 3.40  | 3.17  | 1.89  | 2.91  | 1.96  | 2.29  |
| Electrostatic                  | 184 | 14.05  | 4.51  | 4.60  | 2.31  | 3.80  | 2.35  | 2.63  |
| Mixed                          | 160 | 6.86   | 2.64  | 2.27  | 1.57  | 2.35  | 1.39  | 1.88  |
| Dispersion                     | 184 | 6.56   | 2.95  | 2.51  | 1.75  | 2.51  | 2.07  | 2.30  |
| JSCH-2005-CHNOF                |     |        |       |       |       |       |       |       |
| Overall                        | 134 | 18.64  | 8.99  | 8.61  | 4.73  | 6.33  | 4.97  | 5.15  |
| Overall* <sup>b</sup>          | 128 | 18.57  | 9.01  | 8.63  | 4.58  | 6.17  | 4.81  | 4.95  |
| H-bonded base pairs            | 31  | 36.67  | 15.17 | 10.63 | 8.37  | 10.36 | 5.70  | 5.72  |
| Interstrand base pairs         | 32  | 3.72   | 1.82  | 2.30  | 1.22  | 1.81  | 1.73  | 1.80  |
| Stacked base pairs             | 54  | 18.35  | 10.65 | 12.13 | 4.74  | 6.70  | 6.42  | 6.58  |
| Amino acid pairs               | 17  | 14.75  | 5.93  | 5.60  | 4.66  | 6.29  | 5.13  | 5.88  |
| Amino acid pairs* <sup>b</sup> | 11  | 11.89  | 4.52  | 4.26  | 2.88  | 4.46  | 3.29  | 3.97  |
| S7L                            |     |        |       |       |       |       |       |       |
| Overall                        | 7   | 20.27  | 12.36 | 9.29  | 7.93  | 10.13 | 9.69  | 10.08 |
| $\pi$ - $\pi$                  | 5   | 18.76  | 14.55 | 12.84 | 8.27  | 9.81  | 10.67 | 10.25 |
| S30L-CHNOF                     |     |        |       |       |       |       |       |       |
| Overall                        | 24  | 80.79  | 37.55 | 37.10 | 18.07 | 27.60 | 21.33 | 24.14 |
| $\pi$ - $\pi$ stacking         | 7   | 85.91  | 56.95 | 53.38 | 25.92 | 34.26 | 31.15 | 32.54 |
| H-bonded <sup>c</sup>          | 8   | 87.40  | 27.00 | 31.21 | 13.68 | 26.31 | 16.23 | 20.41 |
| Charged complexes <sup>c</sup> | 8   | 82.66  | 31.09 | 31.75 | 14.04 | 23.38 | 16.22 | 19.40 |
| AF6                            |     |        |       |       |       |       |       |       |
| Folding enthalpies             | 6   | 14.37  | 3.35  | 0.59  | 1.64  | 5.00  | 3.38  | 5.11  |
| Folding energies               | 6   | 14.54  | 3.52  | 0.76  | 1.81  | 5.17  | 3.55  | 5.28  |

<sup>a</sup> Without HF  $\cdots$  HF complex, see text. <sup>b</sup> Without complexes of charged amino acids, see text. <sup>c</sup> Two complexes correspond to both H-bonded and charged complexes subsets; see Ref. S2.

Table S6: Mean Absolute Errors in Selected Interatomic Distances (Å) and Angles (degree) for the A24-CHNOF, S66, S7L, and AF6 Benchmark Sets for Geometries Optimized with MNDO, AM1, PM3, PM6, and OM*x*

| Subset                         | N   | Method |        |        |       |        |        |        |
|--------------------------------|-----|--------|--------|--------|-------|--------|--------|--------|
|                                |     | MNDO   | AM1    | PM3    | PM6   | OM1    | OM2    | OM3    |
| A24-CHNOF                      |     |        |        |        |       |        |        |        |
| Selected interatomic distances |     |        |        |        |       |        |        |        |
| Overall                        | 23  | 5.858  | 0.627  | 0.512  | 0.417 | 0.847  | 0.790  | 0.871  |
| H-bonded                       | 5   | 1.402  | 0.402  | 0.206  | 0.392 | 0.402  | 0.189  | 0.336  |
| Mixed                          | 13  | 8.267  | 0.197  | 0.384  | 0.282 | 0.570  | 0.419  | 0.254  |
| Dispersion                     | 5   | 4.050  | 1.970  | 1.152  | 0.794 | 2.010  | 2.357  | 3.009  |
| Selected angles                |     |        |        |        |       |        |        |        |
| Overall                        | 40  | 24.93  | 18.29  | 21.18  | 15.02 | 19.22  | 13.89  | 8.59   |
| H-bonded                       | 13  | 21.72  | 27.77  | 12.19  | 23.50 | 20.86  | 11.47  | 11.50  |
| Mixed                          | 21  | 30.98  | 12.93  | 26.92  | 7.95  | 19.53  | 10.78  | 4.27   |
| Dispersion                     | 6   | 10.74  | 16.54  | 20.56  | 21.40 | 14.57  | 30.00  | 17.40  |
| S66                            |     |        |        |        |       |        |        |        |
| Selected interatomic distances |     |        |        |        |       |        |        |        |
| Overall                        | 172 | 3.817  | 1.393  | 1.273  | 0.651 | 1.821  | 1.010  | 1.942  |
| Electrostatic                  | 28  | 1.700  | 0.375  | 0.184  | 0.183 | 0.321  | 0.175  | 0.286  |
| Mixed                          | 63  | 2.891  | 1.032  | 1.010  | 0.388 | 0.900  | 0.572  | 0.762  |
| Dispersion                     | 81  | 5.270  | 2.027  | 1.854  | 1.018 | 3.055  | 1.639  | 3.432  |
| Selected angles                |     |        |        |        |       |        |        |        |
| Overall                        | 141 | 26.87  | 23.94  | 19.81  | 21.24 | 24.15  | 21.53  | 20.69  |
| Electrostatic                  | 28  | 39.23  | 32.16  | 6.55   | 26.18 | 26.95  | 10.84  | 9.76   |
| Mixed                          | 52  | 29.66  | 21.34  | 16.94  | 15.17 | 24.19  | 15.66  | 20.07  |
| Dispersion                     | 61  | 18.81  | 22.37  | 28.36  | 24.14 | 22.83  | 31.44  | 26.23  |
| S7L                            |     |        |        |        |       |        |        |        |
| Selected interatomic distances |     |        |        |        |       |        |        |        |
| Overall                        | 28  | 13.093 | 9.993  | 12.517 | 1.111 | 9.844  | 15.579 | 10.540 |
| C...C                          | 20  | 17.141 | 13.929 | 17.488 | 1.346 | 13.497 | 21.662 | 14.479 |
| H...H                          | 8   | 2.971  | 0.153  | 0.090  | 0.523 | 0.710  | 0.370  | 0.694  |
| AF6                            |     |        |        |        |       |        |        |        |
| Selected interatomic distances |     |        |        |        |       |        |        |        |
| Overall                        | 27  | 0.810  | 0.246  | 0.343  | 0.139 | 0.398  | 0.502  | 0.566  |
| Selected angles                |     |        |        |        |       |        |        |        |
| Overall                        | 74  | 18.42  | 12.28  | 11.21  | 7.50  | 17.04  | 15.44  | 16.33  |

Table S7: Mean Absolute Errors of the Interaction Energies (kcal/mol) for the A24-CHNOF, S66, and S7L and of the Folding Enthalpies and Energies (kcal/mol) for the AF6 Set, Calculated at the SQC Geometries Using MNDO, AM1, PM3, PM6, and OM*x*

| Subset                                                        | N  | Method |      |      |      |      |      |      |
|---------------------------------------------------------------|----|--------|------|------|------|------|------|------|
|                                                               |    | MNDO   | AM1  | PM3  | PM6  | OM1  | OM2  | OM3  |
| A24-CHNOF                                                     |    |        |      |      |      |      |      |      |
| Interaction energies without deformation energies of monomers |    |        |      |      |      |      |      |      |
| Overall                                                       | 18 | 2.01   | 1.11 | 1.22 | 0.89 | 1.14 | 0.70 | 0.91 |
| H-bonded                                                      | 5  | 3.77   | 1.91 | 1.83 | 1.75 | 1.55 | 1.39 | 1.14 |
| Mixed                                                         | 10 | 1.54   | 0.94 | 1.05 | 0.59 | 1.09 | 0.41 | 0.88 |
| Dispersion                                                    | 3  | 0.66   | 0.35 | 0.77 | 0.45 | 0.66 | 0.52 | 0.65 |
| Interaction energies                                          |    |        |      |      |      |      |      |      |
| Overall                                                       | 18 | 2.01   | 1.11 | 1.25 | 0.89 | 1.15 | 0.72 | 0.91 |
| H-bonded                                                      | 5  | 3.77   | 1.91 | 1.95 | 1.78 | 1.56 | 1.41 | 1.10 |
| Mixed                                                         | 10 | 1.54   | 0.94 | 1.05 | 0.58 | 1.09 | 0.43 | 0.89 |
| Dispersion                                                    | 3  | 0.66   | 0.36 | 0.76 | 0.45 | 0.66 | 0.52 | 0.65 |
| S66                                                           |    |        |      |      |      |      |      |      |
| Interaction energies without deformation energies of monomers |    |        |      |      |      |      |      |      |
| Overall                                                       | 66 | 5.00   | 3.15 | 2.84 | 2.02 | 3.29 | 1.79 | 3.05 |
| Electrostatic                                                 | 23 | 7.93   | 4.54 | 5.02 | 2.67 | 4.50 | 1.92 | 4.32 |
| Mixed                                                         | 20 | 3.48   | 2.51 | 1.89 | 1.68 | 2.60 | 1.36 | 2.03 |
| Dispersion                                                    | 23 | 3.40   | 2.31 | 1.47 | 1.68 | 2.69 | 2.03 | 2.67 |
| Interaction energies                                          |    |        |      |      |      |      |      |      |
| Overall                                                       | 66 | 5.00   | 3.19 | 2.95 | 2.22 | 3.35 | 2.00 | 2.27 |
| Electrostatic                                                 | 23 | 7.93   | 4.60 | 5.36 | 3.12 | 4.60 | 2.47 | 2.11 |
| Mixed                                                         | 20 | 3.48   | 2.53 | 1.90 | 1.74 | 2.60 | 1.39 | 2.04 |
| Dispersion                                                    | 23 | 3.40   | 2.35 | 1.46 | 1.75 | 2.74 | 2.06 | 2.63 |
| S7L                                                           |    |        |      |      |      |      |      |      |
| Interaction energies                                          |    |        |      |      |      |      |      |      |
| Overall                                                       | 7  | 8.54   | 7.63 | 6.31 | 5.15 | 8.46 | 7.35 | 8.37 |
| $\pi$ - $\pi$                                                 | 5  | 8.29   | 8.18 | 7.65 | 6.83 | 8.22 | 8.04 | 8.09 |
| AF6                                                           |    |        |      |      |      |      |      |      |
| Folding enthalpies                                            | 6  | 2.61   | 2.81 | 1.94 | 1.61 | 3.48 | 2.54 | 2.95 |
| Folding energies                                              | 6  | 2.78   | 2.99 | 1.77 | 1.78 | 3.65 | 2.71 | 3.12 |



Table S8: Mean Absolute Errors of the Interaction Energies (kcal/mol) for the A24-CHNOF, S66, S7L and of the Folding Enthalpies and Energies (kcal/mol) for the AF6 Set, Calculated at the SQC Geometries Using PM7 and OM*x*-D*n*

| Subset                                                        | N  | Method |      |      |      |      |      |      |
|---------------------------------------------------------------|----|--------|------|------|------|------|------|------|
|                                                               |    | PM7    | OM2  |      |      | OM3  |      |      |
|                                                               |    |        | D2   | D3   | D3T  | D2   | D3   | D3T  |
| A24-CHNOF                                                     |    |        |      |      |      |      |      |      |
| Interaction energies without deformation energies of monomers |    |        |      |      |      |      |      |      |
| Overall                                                       | 18 | 0.77   | 0.57 | 0.58 | 0.58 | 0.48 | 0.51 | 0.51 |
| H-bonded                                                      | 5  | 1.95   | 0.93 | 0.96 | 0.96 | 0.95 | 1.09 | 1.09 |
| Mixed                                                         | 10 | 0.39   | 0.50 | 0.52 | 0.52 | 0.34 | 0.37 | 0.37 |
| Dispersion                                                    | 3  | 0.07   | 0.22 | 0.14 | 0.14 | 0.15 | 0.03 | 0.03 |
| Interaction energies                                          |    |        |      |      |      |      |      |      |
| Overall                                                       | 18 | 0.77   | 0.57 | 0.58 | 0.57 | 0.45 | 0.49 | 0.49 |
| H-bonded                                                      | 5  | 1.92   | 0.94 | 0.98 | 0.98 | 0.85 | 1.01 | 1.01 |
| Mixed                                                         | 10 | 0.39   | 0.48 | 0.51 | 0.50 | 0.34 | 0.37 | 0.37 |
| Dispersion                                                    | 3  | 0.07   | 0.21 | 0.14 | 0.13 | 0.15 | 0.03 | 0.03 |
| S66                                                           |    |        |      |      |      |      |      |      |
| Interaction energies without deformation energies of monomers |    |        |      |      |      |      |      |      |
| Overall                                                       | 66 | 1.05   | 0.97 | 1.02 | 0.98 | 1.59 | 1.75 | 1.73 |
| Electrostatic                                                 | 23 | 0.95   | 1.28 | 1.27 | 1.27 | 3.77 | 3.83 | 3.86 |
| Mixed                                                         | 20 | 1.00   | 0.90 | 0.93 | 0.90 | 0.50 | 0.55 | 0.53 |
| Dispersion                                                    | 23 | 1.19   | 0.73 | 0.87 | 0.75 | 0.37 | 0.72 | 0.65 |
| Interaction energies                                          |    |        |      |      |      |      |      |      |
| Overall                                                       | 66 | 1.10   | 0.91 | 0.95 | 0.90 | 0.54 | 0.64 | 0.63 |
| Electrostatic                                                 | 23 | 1.14   | 1.28 | 1.23 | 1.24 | 0.81 | 0.76 | 0.80 |
| Mixed                                                         | 20 | 1.00   | 0.84 | 0.86 | 0.83 | 0.51 | 0.51 | 0.49 |
| Dispersion                                                    | 23 | 1.14   | 0.61 | 0.75 | 0.63 | 0.30 | 0.64 | 0.57 |
| S7L                                                           |    |        |      |      |      |      |      |      |
| Interaction energies                                          |    |        |      |      |      |      |      |      |
| Overall                                                       | 7  | 6.02   | 2.33 | 2.46 | 2.24 | 1.21 | 2.54 | 1.63 |
| $\pi$ - $\pi$                                                 | 5  | 5.24   | 0.99 | 0.43 | 0.73 | 0.63 | 2.20 | 1.50 |
| AF6                                                           |    |        |      |      |      |      |      |      |
| Folding enthalpies                                            | 6  | 0.87   | 0.49 | 0.60 | 0.41 | 0.27 | 0.16 | 0.39 |
| Folding energies                                              | 6  | 0.77   | 0.44 | 0.55 | 0.36 | 0.44 | 0.31 | 0.56 |

### **3 Tables: Numerical Results for Individual Molecules and Properties**

Table S9: Benchmark Results for Radicals71 Subset of OV57-CHNOF Data Set. Heats of Formation and Relative Energies (kcal/mol), and Ionization Potentials (eV)

| Molecule                      | Ref.               | MNDO  | AM1   | PM3   | PM6   | PM7   | OM1   | OM2   |       |       | OM3   |       |       |       |
|-------------------------------|--------------------|-------|-------|-------|-------|-------|-------|-------|-------|-------|-------|-------|-------|-------|
|                               |                    |       |       |       |       |       |       | D2    | D3    | D3T   | D2    | D3    | D3T   |       |
| Heats of formation            |                    |       |       |       |       |       |       |       |       |       |       |       |       |       |
| CH Doublet                    | 142.5 <sup>a</sup> | 143.6 | 145.0 | 146.8 | 141.5 | 139.2 | 137.3 | 140.0 | 140.0 | 139.9 | 139.9 | 138.1 | 137.9 | 137.9 |
| CH2+ Doublet                  | 331.0 <sup>b</sup> | 299.9 | 308.8 | 311.4 | 308.5 | 305.3 | 313.8 | 322.5 | 322.3 | 322.2 | 322.2 | 324.9 | 324.7 | 324.5 |
| Carbene Triplet               | 93.7 <sup>a</sup>  | 77.3  | 80.8  | 75.6  | 75.2  | 79.6  | 91.3  | 91.9  | 91.7  | 91.6  | 91.6  | 90.3  | 90.1  | 89.8  |
| Carbene Singlet               | 102.8 <sup>a</sup> | 107.4 | 110.9 | 113.2 | 105.9 | 102.9 | 102.0 | 103.9 | 103.8 | 103.7 | 103.7 | 101.3 | 101.2 | 100.8 |
| Methyl radical                | 35.0 <sup>c</sup>  | 25.8  | 31.3  | 29.8  | 28.5  | 28.3  | 36.8  | 33.7  | 33.4  | 33.3  | 33.3  | 35.2  | 35.0  | 34.5  |
| Ethyl radical                 | 28.9 <sup>c</sup>  | 12.8  | 18.1  | 17.3  | 17.2  | 16.9  | 24.6  | 24.8  | 23.6  | 23.3  | 23.3  | 24.7  | 23.9  | 22.4  |
| n-Propyl radical              | 23.9 <sup>d</sup>  | 7.4   | 11.5  | 12.0  | 12.5  | 12.4  | 19.8  | 20.7  | 18.0  | 17.9  | 17.9  | 20.3  | 18.4  | 15.9  |
| i-Propyl radical              | 21.5 <sup>c</sup>  | 1.4   | 6.8   | 5.5   | 5.8   | 5.9   | 14.8  | 14.7  | 12.2  | 11.9  | 11.9  | 13.8  | 12.0  | 9.4   |
| n-Butyl radical C             | 18.0 <sup>b</sup>  | 2.6   | 5.5   | 7.7   | 8.4   | 8.1   | 14.8  | 16.3  | 11.9  | 11.9  | 12.0  | 15.9  | 12.6  | 9.2   |
| sec-Butyl radical C           | 16.1 <sup>a</sup>  | -3.5  | 0.0   | 0.1   | 1.2   | 1.0   | 9.7   | 9.9   | 5.9   | 5.8   | 5.8   | 8.8   | 5.9   | 2.4   |
| i-Butyl radical               | 16.0 <sup>b</sup>  | 5.0   | 6.8   | 6.7   | 7.1   | 7.3   | 16.9  | 14.7  | 10.1  | 10.2  | 10.2  | 14.9  | 11.3  | 8.0   |
| tert-Butyl radical C          | 12.3 <sup>c</sup>  | -7.2  | -2.9  | -6.1  | -5.4  | -4.9  | 7.7   | 3.7   | -0.5  | -0.6  | -0.6  | 2.8   | -0.4  | -3.9  |
| Ethylene radical cation       | 254.8 <sup>b</sup> | 238.3 | 243.8 | 248.7 | 246.6 | 245.7 | 244.4 | 244.8 | 243.9 | 243.6 | 243.6 | 251.5 | 251.0 | 249.6 |
| Vinyl radical                 | 71.6 <sup>c</sup>  | 63.8  | 64.8  | 63.0  | 57.4  | 58.0  | 66.0  | 67.4  | 66.8  | 66.6  | 66.6  | 66.4  | 66.1  | 64.9  |
| Acetylene radical cation      | 317.4 <sup>b</sup> | 302.8 | 310.6 | 310.4 | 315.2 | 315.9 | 309.3 | 312.4 | 312.0 | 311.8 | 311.8 | 318.1 | 317.9 | 317.1 |
| Allyl radical                 | 40.8 <sup>c</sup>  | 35.4  | 38.6  | 39.6  | 37.9  | 36.9  | 41.8  | 42.9  | 41.2  | 40.8  | 40.8  | 43.6  | 42.5  | 40.2  |
| Propargyl radical             | 81.0 <sup>d</sup>  | 74.6  | 78.7  | 77.3  | 80.1  | 81.1  | 87.3  | 87.9  | 86.9  | 86.5  | 86.5  | 87.4  | 87.0  | 85.3  |
| Propen-2-yl radical ecl       | 58.1 <sup>b</sup>  | 45.7  | 51.0  | 50.4  | 43.8  | 44.5  | 58.3  | 57.9  | 56.4  | 56.0  | 56.0  | 56.7  | 55.9  | 53.6  |
| Cyclopropenyl radical         | 105.0 <sup>b</sup> | 105.4 | 110.3 | 102.2 | 91.9  | 95.2  | 108.2 | 114.9 | 113.8 | 113.5 | 113.5 | 110.2 | 109.6 | 107.9 |
| Cyclopropyl radical           | 66.9 <sup>b</sup>  | 53.5  | 62.3  | 58.0  | 51.0  | 54.0  | 61.7  | 64.9  | 63.1  | 62.9  | 62.9  | 63.1  | 62.1  | 59.9  |
| Cyclopentadienyl radical      | 58.0 <sup>b</sup>  | 58.3  | 68.2  | 62.1  | 60.8  | 62.2  | 66.9  | 65.3  | 62.4  | 61.7  | 61.7  | 65.1  | 63.7  | 59.3  |
| Phenyl radical                | 81.2 <sup>e</sup>  | 78.1  | 79.5  | 77.3  | 74.7  | 75.7  | 71.6  | 71.5  | 67.8  | 67.0  | 67.0  | 70.4  | 68.6  | 63.2  |
| Phenoxy radical               | 12.9 <sup>d</sup>  | 9.9   | 15.4  | 13.5  | 14.6  | 14.6  | 16.6  | 12.5  | 8.1   | 7.3   | 7.3   | 12.6  | 10.3  | 4.4   |
| Benzyl radical                | 48.4 <sup>c</sup>  | 49.5  | 52.0  | 52.6  | 51.5  | 51.0  | 56.1  | 54.1  | 48.7  | 47.9  | 47.9  | 54.6  | 51.5  | 44.9  |
| Amidyl radical (NH2)          | 45.1 <sup>c</sup>  | 37.0  | 38.4  | 35.4  | 44.4  | 42.4  | 42.1  | 47.8  | 47.6  | 47.5  | 47.5  | 39.3  | 39.3  | 38.9  |
| NH2+ triplet                  | 302.0 <sup>b</sup> | 292.1 | 279.6 | 261.3 | 277.9 | 277.8 | 292.0 | 299.0 | 298.9 | 298.8 | 298.8 | 292.2 | 292.1 | 291.8 |
| Ammonia radical cation        | 223.2 <sup>b</sup> | 222.4 | 209.5 | 200.5 | 211.7 | 211.8 | 219.0 | 216.6 | 216.3 | 216.2 | 216.2 | 214.4 | 214.2 | 213.7 |
| Aminomethyl radical           | 38.0 <sup>b</sup>  | 19.3  | 15.7  | 20.8  | 17.4  | 17.2  | 30.1  | 29.3  | 28.5  | 28.2  | 28.2  | 25.2  | 24.7  | 23.3  |
| Cyanide radical               | 104.9 <sup>a</sup> | 129.3 | 114.4 | 128.0 | 102.1 | 103.8 | 112.7 | 111.6 | 111.6 | 111.4 | 111.4 | 102.7 | 102.7 | 102.3 |
| Cyanomethyl radical           | 58.1 <sup>c</sup>  | 53.2  | 57.3  | 62.0  | 58.5  | 57.4  | 62.4  | 64.1  | 63.4  | 63.0  | 63.0  | 62.1  | 61.8  | 60.4  |
| Azidyl radical (N3)           | 99.0 <sup>f</sup>  | 102.4 | 107.4 | 106.0 | 115.2 | 111.9 | 100.7 | 100.0 | 99.8  | 99.5  | 99.5  | 100.8 | 100.7 | 99.9  |
| Hydroxyl radical              | 9.4 <sup>c</sup>   | 0.5   | 0.9   | 3.0   | 14.3  | 7.9   | 4.0   | 5.3   | 5.3   | 5.3   | 5.3   | 4.3   | 4.3   | 4.2   |
| OH+ triplet                   | 309.1 <sup>b</sup> | 278.9 | 286.4 | 289.6 | 255.4 | 264.4 | 279.3 | 301.9 | 301.9 | 301.8 | 301.8 | 301.8 | 301.8 | 301.6 |
| Water radical cation          | 233.0 <sup>b</sup> | 210.3 | 216.3 | 224.4 | 209.8 | 213.6 | 211.9 | 227.5 | 227.4 | 227.3 | 227.3 | 227.0 | 227.0 | 226.7 |
| Formyl radical (HCO)          | 10.0 <sup>c</sup>  | -0.3  | -1.0  | -9.3  | -3.6  | -2.5  | -6.3  | 0.1   | -0.1  | -0.3  | -0.3  | -4.4  | -4.4  | -4.9  |
| Methoxy radical (CH3O)        | 4.1 <sup>c</sup>   | -0.1  | -3.5  | -6.5  | 5.5   | 0.3   | 2.8   | 0.7   | 0.1   | -0.0  | -0.0  | 1.5   | 1.2   | 0.2   |
| Hydroxymethyl radical (CH2OH) | -4.1 <sup>c</sup>  | -31.7 | -26.5 | -23.5 | -23.3 | -20.9 | -12.7 | -9.4  | -9.9  | -10.1 | -10.1 | -10.5 | -10.9 | -11.7 |
| HO2 radical                   | 2.5 <sup>b</sup>   | -10.2 | -11.2 | -2.0  | 5.8   | 3.7   | -4.0  | -4.3  | -4.5  | -4.6  | -4.6  | -4.2  | -4.2  | -4.7  |
| Acetyl radical (CH3CO)        | -2.4 <sup>c</sup>  | -14.4 | -11.7 | -19.0 | -19.5 | -17.9 | -19.0 | -16.0 | -17.0 | -17.2 | -17.2 | -19.9 | -20.4 | -21.9 |

... continued on next page ...

Table S9: . . . continued from previous page . . .

| Molecule                       | Ref.               | MNDO  | AM1   | PM3   | PM6   | PM7   | OM1   |       | OM2   |       | OM3   |       | D3T   | D3    | D3T   | D3    | D3T   |
|--------------------------------|--------------------|-------|-------|-------|-------|-------|-------|-------|-------|-------|-------|-------|-------|-------|-------|-------|-------|
|                                |                    |       |       |       |       |       | D2    | D3    | D2    | D3    | D2    | D3    |       |       |       |       |       |
| Cyanate radical (NCO)          | 37.0 <sup>b</sup>  | 37.1  | 38.9  | 32.4  | 42.1  | 38.1  | 33.1  | 39.7  | 39.2  | 39.7  | 39.2  | 39.2  | 39.2  | 34.3  | 34.2  | 33.5  | 33.5  |
| Nitric oxide (NO) Doublet      | 21.6 <sup>f</sup>  | -0.2  | 1.2   | 14.7  | 28.0  | 22.7  | 6.1   | 24.5  | 24.4  | 24.5  | 24.4  | 24.4  | 15.2  | 15.2  | 14.9  | 14.9  |       |
| Nitrogen dioxide (NO2) Doublet | 7.9 <sup>f</sup>   | -4.5  | -15.0 | -1.0  | -8.1  | -4.1  | -6.5  | 5.1   | 4.9   | 5.1   | 4.9   | 4.7   | -1.5  | -1.5  | -2.2  | -2.2  |       |
| Relative energies              |                    |       |       |       |       |       |       |       |       |       |       |       |       |       |       |       |       |
| Carbene Triplet (linear)       | 5.5 <sup>g</sup>   | 1.2   | 1.4   | 1.9   | 0.0   | 0.0   | 9.4   | 5.1   | 5.1   | 5.1   | 5.1   | 5.1   | 7.9   | 7.8   | 7.9   | 7.9   | 7.9   |
| Carbene Singlet                | 9.1 <sup>a</sup>   | 30.1  | 30.0  | 37.6  | 30.7  | 23.2  | 10.7  | 12.0  | 12.1  | 12.0  | 12.1  | 12.0  | 11.0  | 11.1  | 11.0  | 11.0  | 11.0  |
| Carbene Singlet (linear)       | 28.2 <sup>g</sup>  | 14.0  | 14.2  | 25.0  | 14.0  | 13.7  | 41.5  | 35.9  | 35.9  | 35.9  | 35.9  | 35.9  | 39.7  | 39.6  | 39.7  | 39.7  | 39.7  |
| Amidyl radical (NH2) (linear)  | 34.4 <sup>b</sup>  | 46.8  | 33.1  | 30.0  | 28.6  | 26.2  | 50.5  | 39.1  | 39.1  | 39.1  | 39.1  | 39.1  | 40.4  | 40.3  | 40.5  | 40.5  | 40.5  |
| Ionization potentials          |                    |       |       |       |       |       |       |       |       |       |       |       |       |       |       |       |       |
| CH Doublet                     | 10.64 <sup>h</sup> | 9.38  | 9.72  | 9.50  | 8.88  | 8.47  | 9.21  | 9.92  | 9.92  | 9.92  | 9.92  | 9.92  | 9.91  | 9.91  | 9.91  | 9.91  | 9.91  |
| Methyl radical                 | 9.84 <sup>h</sup>  | 9.60  | 9.77  | 9.84  | 10.08 | 9.94  | 9.70  | 9.81  | 9.81  | 9.81  | 9.81  | 9.81  | 10.12 | 10.12 | 10.12 | 10.12 | 10.12 |
| Ethyl radical                  | 8.51 <sup>h</sup>  | 9.32  | 9.03  | 9.15  | 9.09  | 9.03  | 8.58  | 8.58  | 8.58  | 8.58  | 8.58  | 8.58  | 8.84  | 8.84  | 8.84  | 8.84  | 8.84  |
| n-Propyl radical               | 8.43 <sup>h</sup>  | 9.34  | 9.01  | 9.11  | 9.07  | 8.98  | 8.54  | 8.55  | 8.55  | 8.55  | 8.55  | 8.55  | 8.81  | 8.81  | 8.81  | 8.81  | 8.81  |
| i-Propyl radical               | 7.69 <sup>h</sup>  | 9.15  | 8.59  | 8.74  | 8.41  | 8.42  | 7.89  | 7.83  | 7.83  | 7.83  | 7.83  | 7.83  | 8.07  | 8.07  | 8.07  | 8.07  | 8.07  |
| n-Butyl radical C              | 8.50 <sup>h</sup>  | 9.33  | 9.13  | 9.30  | 9.17  | 9.08  | 8.56  | 8.48  | 8.48  | 8.48  | 8.48  | 8.48  | 8.93  | 8.94  | 8.94  | 8.94  | 8.94  |
| sec-Butyl radical C            | 7.59 <sup>h</sup>  | 9.11  | 8.53  | 8.67  | 8.38  | 8.36  | 7.82  | 7.76  | 7.76  | 7.76  | 7.76  | 7.76  | 8.01  | 8.01  | 8.01  | 8.01  | 8.01  |
| i-Butyl radical                | 8.31 <sup>h</sup>  | 9.35  | 9.06  | 9.19  | 9.12  | 9.01  | 8.58  | 8.55  | 8.55  | 8.55  | 8.55  | 8.55  | 8.85  | 8.86  | 8.86  | 8.86  | 8.86  |
| tert-Butyl radical C           | 6.92 <sup>h</sup>  | 9.00  | 8.21  | 8.37  | 7.83  | 7.90  | 7.32  | 7.19  | 7.19  | 7.19  | 7.19  | 7.19  | 7.42  | 7.42  | 7.42  | 7.42  | 7.42  |
| Vinyl radical                  | 9.45 <sup>h</sup>  | 9.07  | 8.86  | 9.15  | 9.00  | 8.91  | 9.40  | 9.31  | 9.31  | 9.31  | 9.31  | 9.31  | 9.68  | 9.68  | 9.68  | 9.68  | 9.68  |
| Allyl radical                  | 8.13 <sup>h</sup>  | 8.27  | 8.36  | 8.47  | 8.60  | 8.57  | 7.96  | 8.07  | 8.07  | 8.07  | 8.07  | 8.07  | 8.35  | 8.35  | 8.35  | 8.35  | 8.35  |
| Propargyl radical              | 8.34 <sup>h</sup>  | 8.56  | 8.71  | 8.79  | 9.06  | 8.96  | 8.17  | 8.42  | 8.42  | 8.42  | 8.42  | 8.42  | 8.64  | 8.64  | 8.64  | 8.64  | 8.64  |
| Cyclopropenyl radical          | 5.80 <sup>h</sup>  | 7.69  | 7.64  | 7.60  | 8.11  | 8.09  | 6.61  | 6.73  | 6.73  | 6.73  | 6.73  | 6.73  | 7.04  | 7.04  | 7.04  | 7.04  | 7.04  |
| Cyclopropyl radical            | 8.05 <sup>h</sup>  | 9.32  | 9.05  | 9.14  | 9.18  | 9.17  | 8.53  | 8.45  | 8.45  | 8.45  | 8.45  | 8.45  | 8.77  | 8.77  | 8.77  | 8.77  | 8.77  |
| Cyclopentadienyl radical       | 8.69 <sup>h</sup>  | 8.94  | 9.06  | 9.16  | 9.07  | 9.19  | 8.73  | 8.73  | 8.73  | 8.73  | 8.73  | 8.73  | 9.02  | 9.02  | 9.02  | 9.02  | 9.02  |
| Phenyl radical                 | 9.20 <sup>h</sup>  | 10.03 | 9.96  | 10.22 | 9.59  | 9.59  | 9.60  | 9.19  | 9.19  | 9.19  | 9.19  | 9.19  | 9.68  | 9.67  | 9.68  | 9.68  | 9.68  |
| Phenoxy radical                | 8.84 <sup>h</sup>  | 8.64  | 8.80  | 8.80  | 9.07  | 8.97  | 8.38  | 8.59  | 8.59  | 8.59  | 8.59  | 8.59  | 8.86  | 8.86  | 8.87  | 8.87  | 8.87  |
| Benzyl radical                 | 7.20 <sup>h</sup>  | 7.62  | 7.69  | 7.83  | 7.88  | 7.93  | 7.23  | 7.34  | 7.34  | 7.34  | 7.34  | 7.34  | 7.61  | 7.61  | 7.61  | 7.61  | 7.61  |
| Amidyl radical (NH2)           | 12.45 <sup>h</sup> | 12.26 | 12.07 | 11.26 | 12.52 | 12.41 | 12.03 | 12.43 | 12.43 | 12.43 | 12.43 | 12.43 | 12.54 | 12.54 | 12.54 | 12.54 | 12.54 |
| Ammonia radical cation         | 23.50 <sup>h</sup> | 22.05 | 21.81 | 19.95 | 21.53 | 21.32 | 21.60 | 22.01 | 22.01 | 22.01 | 22.01 | 22.01 | 21.96 | 21.96 | 21.96 | 21.96 | 21.96 |
| Cyanide radical                | 14.17 <sup>h</sup> | 13.57 | 13.31 | 13.53 | 12.49 | 12.70 | 14.38 | 14.16 | 14.16 | 14.16 | 14.16 | 14.16 | 14.05 | 14.05 | 14.05 | 14.05 | 14.05 |
| Formyl radical (HCO)           | 9.31 <sup>h</sup>  | 8.85  | 9.01  | 8.96  | 8.75  | 8.75  | 9.04  | 9.61  | 9.61  | 9.61  | 9.61  | 9.61  | 9.68  | 9.67  | 9.68  | 9.68  | 9.68  |
| HO2 radical                    | 11.53 <sup>h</sup> | 11.95 | 11.69 | 11.73 | 11.01 | 10.86 | 11.39 | 12.21 | 12.21 | 12.21 | 12.21 | 12.21 | 12.42 | 12.42 | 12.42 | 12.42 | 12.42 |
| Nitric oxide (NO) Doublet      | 9.25 <sup>b</sup>  | 10.20 | 10.06 | 9.97  | 9.79  | 9.84  | 9.50  | 10.35 | 10.35 | 10.35 | 10.35 | 10.35 | 10.05 | 10.05 | 10.05 | 10.05 | 10.05 |
| Nitrogen dioxide (NO2) Doublet | 9.80 <sup>h</sup>  | 11.85 | 11.53 | 10.24 | 10.37 | 10.46 | 10.66 | 11.48 | 11.48 | 11.48 | 11.48 | 11.48 | 11.37 | 11.37 | 11.37 | 11.37 | 11.37 |

a L.A.Curtiss, K.Raghavachari, P.C.Redfern, and J.A.Pople, J.Chem.Phys. 106, 1063 (1997). b S.G.Lias, J.E.Bartmess, J.F.Liebman, J.L.Holmes, R.D.Levin, and W.G.Mallard, "Gas Phase Ion and Neutral Thermochemistry", J.Phys.Chem.Ref.Data 17, Suppl. 1 (1988). c J.Berkowitz, G.B.Ellison, and D.Gutman, J.Phys.Chem. 98, 2744 (1994). d W.Tsang, "Heats of Formation of Organic Free Radicals by Kinetic Methods" in: Energetics of Organic Free Radicals, J.A.M.Simoes, A.Greenberg, J.F.Liebman (eds.), Blackie Academic and Professional, London, 1996, pp. 22-58. e G3 values derived from the data in: L.A.Curtiss, K.Raghavachari, P.C.Redfern, V.Rassolov, and J.A.Pople, J.Chem.Phys. 112, 7374 (2000). f M.W.Chase, C.A.Davies, J.R.Downey, D.R.Frurip, R.A.McDonald, and A.N.Syverud, "JANAF Thermochemical Tables", 3rd edition, J.Phys.Chem.Ref.Data 14, Suppl.1 (1985). g M.E.Jacox, "Vibrational and Electronic Energy Levels of Polyatomic Transient Molecules", J.Phys.Chem.Ref.Data Monograph No. 3 (1994). h V.N.Kondratev (ed.), "Dissociation Energies of Chemical Bonds, Ionization Potentials, and Electron Affinities", Nauka, Moscow, 1974 (in Russian).

Table S10: Benchmark Results for Anions24 Subset of OVS7-CHNOF Data Set. Heats of Formation (kcal/mol)

| Molecule | Ref.                | MNDO   | AMI    | PM3    | PM6    | PM7    | OM1    |        | OM2    |        | OM3    |        | OM3    |        | D3T    |
|----------|---------------------|--------|--------|--------|--------|--------|--------|--------|--------|--------|--------|--------|--------|--------|--------|
|          |                     |        |        |        |        |        | D2     | D3     | D2     | D3     | D2     | D3     | D2     | D3     |        |
| H-       | 33.2 <sup>a</sup>   | 73.8   | 85.6   | 91.8   | 125.9  | 123.1  | 52.3   | 56.7   | 56.7   | 56.7   | 61.1   | 61.1   | 61.1   | 61.1   | 61.1   |
| CH3-     | 33.2 <sup>b</sup>   | 56.9   | 57.7   | 51.5   | 41.6   | 35.8   | 56.7   | 48.9   | 48.6   | 48.5   | 41.3   | 41.1   | 40.5   | 40.5   | 40.5   |
| CH3CH2-  | 35.1 <sup>b</sup>   | 27.4   | 34.5   | 31.7   | 34.4   | 27.8   | 43.2   | 36.6   | 35.3   | 35.1   | 30.3   | 29.5   | 27.9   | 27.9   | 27.9   |
| HCC-     | 65.5 <sup>b</sup>   | 104.7  | 89.1   | 76.4   | 84.7   | 85.2   | 61.9   | 61.7   | 61.7   | 61.4   | 61.7   | 61.6   | 60.9   | 60.9   | 60.9   |
| CH2CH-   | 52.8 <sup>b</sup>   | 71.1   | 67.8   | 61.7   | 65.1   | 62.3   | 58.4   | 52.7   | 52.1   | 51.8   | 47.9   | 47.6   | 46.4   | 46.4   | 46.4   |
| c-C5H5-  | 19.6 <sup>b</sup>   | 18.9   | 25.2   | 15.9   | 17.5   | 12.2   | 30.0   | 28.2   | 25.3   | 24.6   | 20.9   | 19.5   | 15.2   | 15.2   | 15.2   |
| C6H5-    | 54.7 <sup>b</sup>   | 61.0   | 57.4   | 51.7   | 54.8   | 53.3   | 51.8   | 44.9   | 41.1   | 40.4   | 41.6   | 39.8   | 34.4   | 34.4   | 34.4   |
| NH2-     | 27.0 <sup>b</sup>   | 47.3   | 52.5   | 38.3   | 43.2   | 36.1   | 56.7   | 51.6   | 51.5   | 51.4   | 39.8   | 39.8   | 39.4   | 39.4   | 39.4   |
| CH3NH-   | 32.0 <sup>b</sup>   | 23.5   | 33.1   | 21.7   | 37.4   | 30.9   | 38.4   | 31.9   | 31.1   | 30.8   | 25.6   | 25.0   | 23.8   | 23.8   | 23.8   |
| (CH3)2N- | 26.1 <sup>b</sup>   | 8.5    | 22.4   | 7.8    | 30.9   | 24.2   | 27.6   | 17.4   | 15.3   | 15.1   | 17.1   | 15.4   | 13.4   | 13.4   | 13.4   |
| C4H4N-   | 18.9 <sup>b</sup>   | 14.3   | 28.1   | 11.5   | 13.9   | 9.5    | 32.7   | 25.5   | 23.2   | 22.4   | 20.9   | 19.8   | 15.9   | 15.9   | 15.9   |
| NC-      | 17.7 <sup>b</sup>   | 55.3   | 44.0   | 27.7   | 38.0   | 31.8   | 22.4   | 23.5   | 23.4   | 23.2   | 15.7   | 15.7   | 15.3   | 15.3   | 15.3   |
| CH2CN-   | 25.1 <sup>b</sup>   | 32.0   | 30.8   | 28.5   | 14.7   | 8.7    | 40.9   | 37.9   | 37.2   | 36.8   | 32.7   | 32.4   | 30.9   | 30.9   | 30.9   |
| OH-      | -32.7 <sup>b</sup>  | -5.8   | -14.1  | -17.5  | -33.0  | -33.9  | -4.3   | -24.2  | -24.2  | -24.2  | -29.0  | -29.0  | -29.2  | -29.2  | -29.2  |
| CH3O-    | -33.2 <sup>b</sup>  | -39.7  | -38.5  | -37.9  | -34.0  | -32.0  | -34.0  | -46.1  | -46.7  | -46.9  | -51.1  | -51.6  | -52.4  | -52.4  | -52.4  |
| C2H5O-   | -44.5 <sup>b</sup>  | -45.3  | -45.5  | -44.8  | -46.3  | -44.2  | -38.9  | -52.7  | -54.5  | -54.6  | -58.1  | -59.4  | -61.2  | -61.2  | -61.2  |
| C6H5O-   | -39.4 <sup>b</sup>  | -42.2  | -41.0  | -44.1  | -51.1  | -50.9  | -29.6  | -39.2  | -43.6  | -44.3  | -46.2  | -48.5  | -54.4  | -54.4  | -54.4  |
| HCOO-    | -110.9 <sup>b</sup> | -101.6 | -109.4 | -110.9 | -115.2 | -112.9 | -102.4 | -111.8 | -112.2 | -112.4 | -118.7 | -118.8 | -119.8 | -119.8 | -119.8 |
| CH3COO-  | -120.5 <sup>b</sup> | -110.0 | -115.4 | -119.6 | -130.2 | -126.7 | -106.3 | -121.9 | -123.4 | -123.6 | -127.6 | -128.5 | -130.5 | -130.5 | -130.5 |
| C6H5COO- | -97.3 <sup>b</sup>  | -78.7  | -86.9  | -89.7  | -99.2  | -96.4  | -82.8  | -99.8  | -105.6 | -106.4 | -103.7 | -106.9 | -114.0 | -114.0 | -114.0 |
| HOO-     | -22.5 <sup>b</sup>  | -17.8  | -17.9  | -24.0  | -12.5  | -12.7  | -7.6   | -27.5  | -27.6  | -27.7  | -33.9  | -33.9  | -34.4  | -34.4  | -34.4  |
| HCO-     | 1.9 <sup>b</sup>    | 4.9    | 0.2    | -7.5   | -0.9   | -0.2   | -14.0  | -22.8  | -22.9  | -23.1  | -28.5  | -28.5  | -29.0  | -29.0  | -29.0  |
| NO2-     | -45.2 <sup>b</sup>  | -63.5  | -68.7  | -42.9  | -53.7  | -54.4  | -43.8  | -51.1  | -51.3  | -51.5  | -55.6  | -55.6  | -56.3  | -56.3  | -56.3  |
| CH2NO2-  | -27.2 <sup>b</sup>  | -14.9  | -29.2  | -43.3  | -52.1  | -48.7  | -11.1  | -36.5  | -37.5  | -37.9  | -37.4  | -38.0  | -39.7  | -39.7  | -39.7  |

a M.W.Chase, C.A.Davies, J.R.Downey, D.R.Frurip, R.A.McDonald, and A.N.Syverud, "JANAF Thermochemical Tables", 3rd edition, J.Phys.Chem.Ref.Data 14, Suppl.1 (1985). b S.G.Lias, J.E.Bartmess, J.F.Liebman, J.L.Holmes, R.D.Levin, and W.G.Mallard, "Gas Phase Ion and Neutral Thermochemistry", J.Phys.Chem.Ref.Data 17, Suppl. 1 (1988).

Table S11: Benchmark Results for Cations41 Subset of OVS7-CHNOF Data Set. Heats of Formation and Relative Energies (kcal/mol)

| Molecule            | Ref.               | MNDO  | AM1   | PM3   | PM6   | PM7   | OM1   | OM2   |       |       | OM3   |       |       |       |
|---------------------|--------------------|-------|-------|-------|-------|-------|-------|-------|-------|-------|-------|-------|-------|-------|
|                     |                    |       |       |       |       |       |       | D2    | D3    | D3T   | D2    | D3    | D3T   |       |
| Heats of formation  |                    |       |       |       |       |       |       |       |       |       |       |       |       |       |
| H+                  | 365.7 <sup>a</sup> | 326.7 | 314.9 | 353.6 | 311.5 | 307.4 | 348.2 | 343.8 | 343.8 | 343.8 | 343.8 | 339.4 | 339.4 | 339.4 |
| CH+                 | 387.8 <sup>b</sup> | 358.7 | 367.9 | 365.9 | 344.8 | 332.4 | 348.0 | 366.9 | 366.8 | 366.8 | 366.8 | 364.7 | 364.7 | 364.5 |
| CH3+ methyl         | 261.3 <sup>b</sup> | 243.9 | 252.4 | 256.6 | 257.3 | 252.3 | 254.1 | 255.7 | 255.4 | 255.3 | 255.3 | 262.4 | 262.0 | 261.6 |
| C2H3+ nonclassical  | 215.9 <sup>b</sup> | 290.2 | 280.6 | 280.0 | 285.9 | 286.9 | 273.5 | 280.4 | 279.8 | 279.6 | 279.6 | 282.2 | 281.7 | 280.8 |
| C2H5+ nonclassical  | 215.9 <sup>b</sup> | 234.7 | 226.3 | 232.1 | 229.4 | 229.4 | 221.9 | 222.9 | 221.6 | 221.4 | 221.4 | 227.7 | 226.6 | 225.4 |
| C3H3+ cyclopropenyl | 257.0 <sup>b</sup> | 272.6 | 276.4 | 269.8 | 268.3 | 271.2 | 250.5 | 259.4 | 258.3 | 258.0 | 258.0 | 262.2 | 261.6 | 260.0 |
| HCCCH2+ propargyl   | 282.0 <sup>b</sup> | 265.4 | 273.7 | 275.3 | 280.4 | 279.9 | 270.0 | 276.4 | 275.5 | 275.1 | 275.1 | 280.9 | 280.4 | 278.7 |
| C3H5+ allyl         | 226.0 <sup>b</sup> | 221.4 | 226.2 | 232.7 | 230.2 | 228.5 | 220.6 | 223.7 | 221.9 | 221.5 | 221.5 | 230.7 | 229.5 | 227.3 |
| C3H7+ 2-propyl      | 190.9 <sup>b</sup> | 201.6 | 193.6 | 199.5 | 185.8 | 187.1 | 187.4 | 185.1 | 182.6 | 182.4 | 182.4 | 190.0 | 188.2 | 185.6 |
| C3H7+ 1-propyl (29) | 211.0 <sup>b</sup> | 212.4 | 207.8 | 214.4 | 208.3 | 206.5 | 206.0 | 206.6 | 203.9 | 203.8 | 203.8 | 212.3 | 210.4 | 207.9 |
| C4H7+ methylallyl   | 207.9 <sup>c</sup> | 206.8 | 205.8 | 211.9 | 204.7 | 204.8 | 199.2 | 199.3 | 196.2 | 195.8 | 195.8 | 205.7 | 203.6 | 200.4 |
| C4H9+ n-butyl sec   | 183.0 <sup>b</sup> | 194.3 | 184.0 | 190.8 | 179.0 | 179.3 | 179.4 | 176.8 | 172.8 | 172.7 | 172.7 | 182.1 | 179.2 | 175.6 |
| C4H9+ tert-butyl    | 165.8 <sup>b</sup> | 188.0 | 174.8 | 178.7 | 159.9 | 163.6 | 167.9 | 159.4 | 155.2 | 155.1 | 155.1 | 164.6 | 161.4 | 157.9 |
| C6H5+ phenyl        | 269.3 <sup>b</sup> | 283.1 | 283.7 | 288.8 | 271.8 | 272.9 | 260.8 | 254.5 | 250.8 | 250.1 | 250.1 | 262.6 | 260.9 | 255.5 |
| C6H5CH2+ benzyl     | 215.0 <sup>b</sup> | 218.0 | 222.1 | 227.4 | 224.5 | 225.6 | 215.2 | 214.6 | 209.2 | 208.4 | 208.4 | 221.7 | 218.6 | 212.0 |
| NH2+ triplet        | 302.0 <sup>b</sup> | 292.1 | 279.6 | 261.3 | 277.9 | 277.8 | 292.0 | 299.0 | 298.9 | 298.8 | 298.8 | 292.2 | 292.1 | 291.8 |
| CH2NH2+             | 179.4 <sup>d</sup> | 186.8 | 176.3 | 185.3 | 183.0 | 181.1 | 173.9 | 174.9 | 174.0 | 173.7 | 173.7 | 173.4 | 172.9 | 171.6 |
| HCNH+               | 226.0 <sup>b</sup> | 227.2 | 214.8 | 213.6 | 213.8 | 211.1 | 208.4 | 221.6 | 221.3 | 221.0 | 221.0 | 211.5 | 211.3 | 210.5 |
| CH3CNH+             | 195.0 <sup>b</sup> | 207.8 | 196.1 | 197.9 | 190.9 | 189.7 | 190.4 | 201.5 | 200.3 | 199.9 | 199.9 | 190.8 | 190.1 | 188.2 |
| C5H5NH+ pyridinium  | 178.0 <sup>b</sup> | 187.9 | 184.2 | 187.3 | 183.1 | 185.2 | 175.3 | 175.0 | 170.9 | 170.1 | 170.1 | 176.6 | 174.4 | 168.9 |
| OH+ triplet         | 309.1 <sup>b</sup> | 278.9 | 286.4 | 289.6 | 255.4 | 264.4 | 279.3 | 301.9 | 301.9 | 301.8 | 301.8 | 301.8 | 301.8 | 301.6 |
| CHO+ formyl         | 197.3 <sup>b</sup> | 184.9 | 187.5 | 176.9 | 182.5 | 182.4 | 174.8 | 194.8 | 194.6 | 194.5 | 194.5 | 192.6 | 192.5 | 192.0 |
| CH3CHOH+            | 139.0 <sup>b</sup> | 139.5 | 141.6 | 146.7 | 142.1 | 142.1 | 132.4 | 138.8 | 137.2 | 136.9 | 136.9 | 144.0 | 143.0 | 141.0 |
| CH3CO+ acetyl       | 156.0 <sup>b</sup> | 162.9 | 164.5 | 158.9 | 152.5 | 153.6 | 149.7 | 162.3 | 161.3 | 161.1 | 161.1 | 160.6 | 160.1 | 158.6 |
| H3O+                | 141.0 <sup>b</sup> | 134.2 | 143.5 | 159.1 | 141.1 | 146.0 | 134.9 | 142.9 | 142.7 | 142.6 | 142.6 | 141.7 | 141.6 | 141.1 |
| CH3OH2+             | 136.0 <sup>b</sup> | 134.9 | 138.3 | 156.6 | 136.9 | 144.2 | 134.8 | 142.4 | 141.1 | 141.0 | 141.0 | 146.6 | 145.7 | 144.5 |
| (CH3)2OH+           | 130.0 <sup>b</sup> | 138.8 | 136.6 | 157.0 | 133.5 | 143.2 | 137.3 | 141.8 | 139.2 | 139.1 | 139.1 | 151.2 | 149.0 | 147.1 |
| C4H5O+ furan C-prot | 165.0 <sup>b</sup> | 169.9 | 174.2 | 175.5 | 167.9 | 171.4 | 163.1 | 161.5 | 158.7 | 158.2 | 158.2 | 170.6 | 169.1 | 165.3 |
| OCOH+               | 141.0 <sup>b</sup> | 143.0 | 147.8 | 139.5 | 140.5 | 141.2 | 128.1 | 150.8 | 150.5 | 150.2 | 150.2 | 148.5 | 148.3 | 147.5 |
| H2COH+              | 169.3 <sup>c</sup> | 155.6 | 161.3 | 166.3 | 167.6 | 167.7 | 157.4 | 166.4 | 165.9 | 165.7 | 165.7 | 172.4 | 172.1 | 171.2 |
| HC(OH)2+            | 96.0 <sup>b</sup>  | 86.5  | 88.8  | 95.1  | 102.7 | 102.9 | 85.9  | 100.2 | 99.3  | 99.0  | 99.0  | 106.0 | 105.6 | 104.2 |
| NO+                 | 235.3 <sup>b</sup> | 230.6 | 228.1 | 238.2 | 248.6 | 245.6 | 222.1 | 259.8 | 259.8 | 259.7 | 259.7 | 243.6 | 243.6 | 243.3 |
| NO2+                | 283.0 <sup>b</sup> | 240.6 | 221.1 | 208.4 | 206.3 | 211.8 | 210.7 | 239.7 | 239.5 | 239.3 | 239.3 | 230.8 | 230.8 | 230.1 |
| CH2F+               | 199.0 <sup>b</sup> | 182.8 | 180.4 | 200.3 | 201.3 | 201.8 | 194.6 | 193.7 | 193.3 | 193.2 | 193.2 | 199.2 | 199.0 | 198.4 |
| CH3CHF+             | 157.0 <sup>b</sup> | 165.0 | 157.1 | 172.9 | 163.8 | 165.3 | 159.6 | 158.2 | 156.8 | 156.7 | 156.7 | 161.8 | 160.9 | 159.3 |
| NF2+                | 275.0 <sup>b</sup> | 264.2 | 256.7 | 275.1 | 301.0 | 298.9 | 273.4 | 281.6 | 281.4 | 281.2 | 281.2 | 268.6 | 268.6 | 268.1 |
| Relative energies   |                    |       |       |       |       |       |       |       |       |       |       |       |       |       |
| HCCCH2+ propargyl   | 27.0 <sup>b</sup>  | -7.1  | -2.7  | 5.5   | 12.1  | 8.7   | 19.5  | 17.0  | 17.2  | 17.1  | 17.1  | 18.7  | 18.8  | 18.8  |
| C3H7+ 1-propyl (29) | 20.1 <sup>b</sup>  | 10.9  | 14.2  | 14.8  | 22.5  | 19.3  | 18.6  | 21.4  | 21.3  | 21.4  | 21.4  | 22.3  | 22.1  | 22.2  |
| C4H9+ tert-butyl    | -17.2 <sup>b</sup> | -6.4  | -9.2  | -12.0 | -19.1 | -15.7 | -11.6 | -17.5 | -17.6 | -17.6 | -17.6 | -17.5 | -17.8 | -17.7 |

... continued on next page ...

Table S11: . . . continued from previous page . . .

| Molecule     | Ref.              | MNDO | AMI  | PM3  | PM6   | PM7  | OM1  |      | OM2  |      | OM3  |      |
|--------------|-------------------|------|------|------|-------|------|------|------|------|------|------|------|
|              |                   |      |      |      |       |      | OM1  | OM2  | D2   | D3   | D3T  | D3   |
| NH2+ singlet | 30.1 <sup>f</sup> | 21.1 | 30.0 | 24.3 | 52.7  | 48.9 | 19.2 | 26.0 | 26.1 | 26.0 | 26.1 | 26.0 |
| OH+ singlet  | 50.5 <sup>f</sup> | 53.3 | 53.3 | 43.2 | 113.6 | 65.8 | 53.3 | 53.3 | 53.3 | 53.3 | 53.3 | 53.3 |

a J.B.Pedley, R.D.Naylor, and S.P.Kirby, "Thermochemical Data of Organic Compounds", 2nd ed., Chapman and Hall, London, 1986. b S.G.Lias, J.E.Bartmess, J.F.Liebman, J.L.Holmes, R.D.Levin, and W.G.Mallard, "Gas Phase Ion and Neutral Thermochemistry", J.Phys.Chem.Ref.Data 17, Suppl. 1 (1988). c J.C. Traeger, J.Phys.Chem. 90, 4114 (1986). d G. de Oliveira, J.M.L.Martin, I.K.C.Silwal, and J.F.Liebman, J.Comp.Chem. 22, 1297 (2001). e J.C. Traeger and J.L. Holmes, J.Phys.Chem. 97, 3453 (1993). f M.E.Jacox, "Vibrational and Electronic Energy Levels of Polyatomic Transient Molecules", J.Phys.Chem.Ref.Data Monograph No. 3 (1994).

Table S12: Benchmark Results for BIGMOL20 Subset of OV57-CHNOF Data Set. Heats of Formation (kcal/mol)

| Molecule                      | Ref.                | MNDO   | AM1    | PM3    | PM6    | PM7    | OM1    | OM2    |        | OM3    |        | D3T    | D3T    |
|-------------------------------|---------------------|--------|--------|--------|--------|--------|--------|--------|--------|--------|--------|--------|--------|
|                               |                     |        |        |        |        |        |        | D2     | D3     | D2     | D3     |        |        |
| Tetrahydro-2H-pyran           | -53.4 <sup>a</sup>  | -62.0  | -67.1  | -57.4  | -58.4  | -56.0  | -54.6  | -53.1  | -60.2  | -59.7  | -51.7  | -59.6  | -61.8  |
| Maleic anhydride              | -95.2 <sup>a</sup>  | -88.5  | -76.4  | -90.1  | -84.4  | -82.4  | -85.6  | -87.1  | -89.8  | -90.4  | -87.2  | -90.4  | -92.5  |
| Cyclohexanone                 | -54.0 <sup>a</sup>  | -60.1  | -63.3  | -60.2  | -59.8  | -59.5  | -59.5  | -59.9  | -68.1  | -67.6  | -62.1  | -67.6  | -73.8  |
| Benzoquinone                  | -29.4 <sup>a</sup>  | -32.9  | -25.1  | -31.5  | -27.7  | -28.4  | -26.1  | -32.5  | -37.2  | -37.9  | -32.9  | -37.9  | -41.3  |
| Hydroquinone                  | -63.4 <sup>a</sup>  | -74.0  | -65.7  | -66.1  | -63.8  | -65.2  | -62.2  | -60.6  | -66.0  | -66.7  | -64.6  | -66.7  | -74.2  |
| 2-Methoxy-tetrahydropyran     | -95.5 <sup>a</sup>  | -103.0 | -113.2 | -98.0  | -104.5 | -99.9  | -95.2  | -97.2  | -106.9 | -106.1 | -90.3  | -106.1 | -103.6 |
| Naphthalene                   | 35.9 <sup>a</sup>   | 38.3   | 40.6   | 40.7   | 40.1   | 39.7   | 40.2   | 34.8   | 26.4   | 25.3   | 35.7   | 25.3   | 21.0   |
| 2-Aminobenzoic acid           | -70.7 <sup>a</sup>  | -66.3  | -72.7  | -67.7  | -72.3  | -73.1  | -61.6  | -68.6  | -76.0  | -77.0  | -70.8  | -77.0  | -83.6  |
| 1-Naphthol                    | -7.1 <sup>a</sup>   | -6.8   | -2.2   | -4.1   | -4.0   | -4.3   | 1.1    | -5.1   | -14.3  | -15.3  | -5.5   | -15.3  | -21.3  |
| 2-Naphthol                    | -7.2 <sup>a</sup>   | -9.7   | -3.8   | -4.6   | -5.5   | -5.5   | -0.2   | -5.9   | -14.9  | -16.0  | -6.6   | -16.0  | -22.2  |
| 1,4-Naphthoquinone            | -26.5 <sup>a</sup>  | -22.5  | -15.9  | -22.8  | -19.6  | -21.2  | -20.0  | -32.7  | -41.6  | -42.7  | -31.8  | -42.7  | -47.3  |
| Isophthalic acid              | -166.4 <sup>a</sup> | -155.7 | -156.8 | -155.0 | -152.3 | -154.4 | -154.5 | -159.5 | -167.5 | -168.5 | -159.4 | -168.5 | -173.2 |
| Terephthalic acid             | -171.6 <sup>a</sup> | -155.7 | -156.3 | -154.7 | -151.1 | -153.7 | -154.2 | -159.5 | -167.4 | -168.4 | -159.2 | -168.4 | -173.0 |
| 1-Naphthoic acid              | -53.3 <sup>a</sup>  | -48.3  | -47.2  | -46.7  | -47.8  | -47.9  | -44.2  | -55.2  | -65.8  | -67.0  | -52.8  | -67.0  | -71.0  |
| 2-Naphthoic acid              | -55.6 <sup>a</sup>  | -50.5  | -49.3  | -48.9  | -48.7  | -49.2  | -46.1  | -55.1  | -65.5  | -66.7  | -53.9  | -66.7  | -71.7  |
| Anthracene                    | 55.2 <sup>a</sup>   | 58.9   | 62.9   | 61.7   | 59.5   | 60.4   | 68.0   | 55.5   | 42.8   | 41.4   | 57.5   | 41.4   | 35.8   |
| Phenanthrene                  | 49.6 <sup>b</sup>   | 55.7   | 57.4   | 55.0   | 54.3   | 54.6   | 60.0   | 46.8   | 33.8   | 32.4   | 49.1   | 32.4   | 27.1   |
| 9,10-Anthraquinone            | -22.8 <sup>a</sup>  | -10.5  | -6.0   | -13.2  | -10.9  | -13.2  | -13.6  | -32.7  | -46.0  | -47.5  | -30.4  | -47.5  | -53.0  |
| Phenanthraquinone             | -33.3 <sup>a</sup>  | -6.8   | -0.3   | -10.5  | -2.9   | -6.1   | -5.1   | -23.5  | -37.0  | -38.5  | -21.3  | -38.5  | -44.2  |
| 1,2-Benzanthracene-9,10-dione | -35.6 <sup>a</sup>  | 6.5    | 12.2   | 3.8    | 4.6    | 2.9    | 8.8    | -17.5  | -35.0  | -36.9  | -14.0  | -36.9  | -43.6  |

a J.B.Pedley, R.D.Naylor, and S.P.Kirby, "Thermochemical Data of Organic Compounds", 2nd ed., Chapman and Hall, London, 1986. b S.G.Lias, J.E.Bartmess, J.F.Liebman, J.L.Holmes, R.D.Levin, and W.G.Mallard, "Gas Phase Ion and Neutral Thermochemistry", J.Phys.Chem.Ref.Data 17, Suppl. 1 (1988).



Table S13: Benchmark Results for Conformers30 Subset of OVS7-CHNOF Data Set. Heats of Formation and Barriers (kcal/mol)

| Molecule                       | Ref.               | MNDO   | AM1    | PM3   | PM6    | PM7   | OM1   | OM2   |        | OM3    |       | D3T    |        |
|--------------------------------|--------------------|--------|--------|-------|--------|-------|-------|-------|--------|--------|-------|--------|--------|
|                                |                    |        |        |       |        |       |       | D2    | D3     | D2     | D3    |        |        |
| Heats of formation             |                    |        |        |       |        |       |       |       |        |        |       |        |        |
| Propane tr/tr                  | -25.0 <sup>a</sup> | -24.9  | -24.3  | -23.6 | -21.0  | -23.1 | -25.2 | -25.5 | -28.7  | -28.7  | -25.4 | -28.7  | -30.4  |
| Biphenyl                       | 43.6 <sup>b</sup>  | 46.1   | 47.6   | 48.1  | 47.0   | 45.6  | 44.4  | 39.0  | 27.0   | 27.0   | 40.1  | 27.0   | 21.8   |
| n-Butane                       | -30.0 <sup>a</sup> | -29.7  | -31.1  | -29.1 | -26.0  | -28.2 | -30.4 | -30.1 | -34.8  | -34.8  | -30.3 | -34.8  | -37.5  |
| Cyclohexane chair              | -29.5 <sup>a</sup> | -34.8  | -38.5  | -31.0 | -27.5  | -27.4 | -31.2 | -27.1 | -35.9  | -35.0  | -28.5 | -35.0  | -40.5  |
| Methylcyclohexane eq           | -37.0 <sup>b</sup> | -36.2  | -43.7  | -36.9 | -34.2  | -33.9 | -34.7 | -33.9 | -44.8  | -43.7  | -34.8 | -43.7  | -49.5  |
| 1,4-tr-Dimethyl-cyclohexane ee | -44.1 <sup>a</sup> | -37.7  | -48.9  | -42.7 | -40.8  | -40.3 | -38.3 | -40.8 | -53.8  | -52.5  | -41.1 | -52.4  | -58.5  |
| Dimethylether tr/tr            | -44.0 <sup>a</sup> | -51.2  | -53.2  | -48.3 | -45.8  | -45.0 | -43.7 | -45.6 | -47.6  | -47.7  | -42.8 | -47.7  | -46.2  |
| 2-Methoxy-tetrahydropyran ax   | -95.5 <sup>a</sup> | -103.0 | -113.2 | -98.0 | -104.5 | -99.9 | -95.2 | -97.2 | -106.9 | -106.1 | -90.3 | -106.1 | -103.6 |
| Aminocyclohexane eq            | -25.0 <sup>b</sup> | -25.7  | -31.9  | -24.6 | -22.3  | -20.4 | -20.8 | -17.3 | -27.4  | -26.6  | -21.2 | -26.5  | -35.1  |
| N-Methylpiperidine eq          | -12.0 <sup>b</sup> | -14.7  | -15.2  | -19.3 | -12.5  | -11.6 | -11.1 | -10.1 | -19.8  | -19.2  | -4.8  | -19.2  | -18.4  |
| 4-Methylpiperidine eq          | -19.0 <sup>b</sup> | -20.0  | -27.0  | -24.7 | -22.8  | -20.3 | -15.7 | -13.5 | -23.5  | -22.8  | -13.4 | -22.7  | -27.4  |
| Barriers                       |                    |        |        |       |        |       |       |       |        |        |       |        |        |
| Propane tr/cis                 | 3.7 <sup>a</sup>   | 1.2    | 1.3    | 1.5   | 1.2    | 1.3   | 1.9   | 2.7   | 2.7    | 2.7    | 2.3   | 2.7    | 2.4    |
| Propane cis/cis                | 8.8 <sup>a</sup>   | 2.8    | 3.0    | 3.2   | 2.5    | 2.8   | 4.2   | 5.6   | 5.7    | 5.6    | 4.9   | 5.6    | 4.9    |
| n-Butane cis                   | 6.0 <sup>c</sup>   | 3.2    | 3.3    | 4.0   | 3.5    | 3.8   | 4.2   | 5.1   | 4.8    | 4.9    | 5.0   | 4.9    | 4.7    |
| n-Butane gauche                | 0.8 <sup>d</sup>   | 0.6    | 0.7    | 0.5   | 0.7    | 0.7   | 0.9   | 0.8   | 0.6    | 0.6    | 0.9   | 0.7    | 0.6    |
| n-Butane anticlinal            | 3.4 <sup>d</sup>   | 0.6    | 0.7    | 0.5   | 0.7    | 0.7   | 0.9   | 0.8   | 0.6    | 0.6    | 0.9   | 0.7    | 0.6    |
| Cyclohexane boat               | 5.5 <sup>c</sup>   | 2.5    | 3.5    | 4.4   | 3.6    | 4.0   | 4.2   | 6.1   | 6.3    | 6.2    | 5.7   | 6.2    | 5.7    |
| Cyclohexane twist              | 4.8 <sup>c</sup>   | 2.4    | 3.2    | 4.1   | 3.2    | 3.4   | 3.7   | 5.2   | 5.3    | 5.2    | 5.0   | 5.2    | 5.0    |
| Methylcyclohexane ax           | 1.7 <sup>c</sup>   | 1.0    | 1.4    | 1.1   | 1.4    | 1.5   | 1.6   | 1.8   | 1.3    | 1.4    | 1.8   | 1.5    | 1.4    |
| t-Butyl-Cyclohexane ax         | 4.8 <sup>c</sup>   | 3.9    | 4.7    | 1.1   | 2.8    | 4.4   | 5.6   | 5.6   | 5.1    | 5.1    | 5.1   | 5.1    | 4.4    |
| 1,4-tr-Dimethyl-cyclohexane aa | 3.6 <sup>e</sup>   | 2.1    | 2.8    | 2.3   | 2.9    | 3.0   | 3.3   | 3.5   | 2.6    | 2.9    | 3.7   | 2.9    | 2.9    |
| Dimethylether tr/cis           | 2.7 <sup>a</sup>   | 0.9    | 1.3    | 1.4   | 1.2    | 1.2   | 1.3   | 2.0   | 2.1    | 2.0    | 1.8   | 2.0    | 1.8    |
| Dimethylether cis/cis          | 7.0 <sup>a</sup>   | 1.8    | 2.7    | 2.6   | 2.3    | 2.4   | 2.6   | 3.2   | 3.3    | 3.3    | 3.0   | 3.3    | 3.1    |
| Dihydroxymethane g+g-          | 3.5 <sup>f</sup>   | 2.4    | 3.1    | 2.5   | 3.4    | 3.2   | 4.2   | 2.7   | 2.7    | 2.7    | 3.5   | 2.7    | 3.4    |
| Dihydroxymethane ga            | 4.3 <sup>f</sup>   | 0.0    | 0.0    | 1.2   | 0.0    | 0.0   | 1.8   | 0.0   | -0.0   | -0.0   | 0.0   | -0.0   | 0.0    |
| Dihydroxymethane aa            | 9.2 <sup>f</sup>   | 5.4    | 10.6   | 5.2   | 15.5   | 15.1  | 6.4   | 8.8   | 8.8    | 8.8    | 10.0  | 8.8    | 10.1   |
| 2-Methoxy-tetrahydropyran eq   | 1.1 <sup>f</sup>   | 3.4    | 2.4    | 0.4   | 3.3    | 3.5   | 1.2   | 3.0   | 3.1    | 3.0    | 3.6   | 3.0    | 3.6    |
| Aminocyclohexane ax            | 1.4 <sup>g</sup>   | 0.4    | 2.7    | 2.8   | 4.7    | 4.7   | -0.3  | 1.8   | 1.6    | 1.7    | 2.0   | 1.7    | 1.8    |
| N-Methylpiperidine ax          | 3.1 <sup>g</sup>   | 1.3    | -1.4   | -1.3  | -3.6   | -3.2  | 3.0   | 1.3   | 0.8    | 1.0    | 0.5   | 1.0    | 0.2    |
| 4-Methylpiperidine ax          | 1.9 <sup>c</sup>   | 1.0    | 1.3    | 1.1   | 1.2    | 1.3   | 1.6   | 1.7   | 1.2    | 1.4    | 1.9   | 1.4    | 1.5    |

a J.B.Pedley, R.D.Naylor, and S.P.Kirby, "Thermochemical Data of Organic Compounds", 2nd ed., Chapman and Hall, London, 1986. b S.G.Lias, J.E.Bartmess, J.F.Liebman, J.L.Holmes, R.D.Levin, and W.G.Mallard, "Gas Phase Ion and Neutral Thermochemistry", J.Phys.Chem:Ref.Data 17, Suppl. 1 (1988). c Experimental data cited in: B. Testa, "Grundlagen der Organischen Stereochemie", VCH, Weinheim, 1983. d Experimental data cited in: T.A. Halgren and R.B. Nachbar, J.Comput.Chem. 17, 587 (1996). e M. Kolb, Ph.D. thesis, University of Wuppertal (1991). f U. Salzner and P.v.R. Schleyer, J.Am.Chem.Soc. 115, 10231 (1993). g Experimental data cited in: A. St.-Amant, W. D. Cornell, P. A. Kollman, and T.A. Halgren, J.Comput.Chem. 16, 1483 (1995).

Table S14: Benchmark Results for Isomers44 Subset of OVS7-CHNOF Data Set. Heats of Formation and Relative Energies (kcal/mol)

| Molecule           | Ref.               | MNDO  | AM1   | PM3   | PM6   | PM7   | OM1   | OM2   |       |       | OM3   |       |       |       |
|--------------------|--------------------|-------|-------|-------|-------|-------|-------|-------|-------|-------|-------|-------|-------|-------|
|                    |                    |       |       |       |       |       |       | D2    | D3    | D3T   | D2    | D3    | D3T   |       |
| Heats of formation |                    |       |       |       |       |       |       |       |       |       |       |       |       |       |
| n-Pentane          | -35.1 <sup>a</sup> | -34.4 | -38.0 | -34.5 | -31.0 | -33.3 | -35.5 | -34.7 | -41.1 | -40.8 | -40.8 | -35.2 | -40.3 | -44.6 |
| 2-Methylbutane     | -36.7 <sup>a</sup> | -30.0 | -35.4 | -34.4 | -31.7 | -33.5 | -32.6 | -35.9 | -43.0 | -42.5 | -42.4 | -35.5 | -41.4 | -45.4 |
| Neopentane         | -40.2 <sup>a</sup> | -24.6 | -32.8 | -35.8 | -35.0 | -35.5 | -29.3 | -39.6 | -47.2 | -46.5 | -46.4 | -37.6 | -44.1 | -48.1 |
| n-Hexane           | -39.9 <sup>a</sup> | -39.1 | -44.8 | -39.9 | -36.0 | -38.4 | -40.7 | -39.2 | -47.3 | -46.9 | -46.9 | -40.0 | -46.5 | -51.6 |
| 3-Methylpentane    | -41.1 <sup>a</sup> | -33.0 | -41.3 | -39.0 | -35.7 | -37.8 | -36.7 | -39.9 | -49.0 | -48.2 | -48.2 | -39.5 | -47.2 | -52.0 |
| 2-Methylpentane    | -41.8 <sup>a</sup> | -34.6 | -42.2 | -40.0 | -36.7 | -38.7 | -37.7 | -40.4 | -49.2 | -48.6 | -48.5 | -40.3 | -47.6 | -52.6 |
| 2,3-Dimethylbutane | -42.6 <sup>a</sup> | -27.7 | -38.8 | -39.2 | -36.4 | -38.1 | -34.0 | -41.1 | -50.7 | -49.8 | -49.7 | -39.8 | -48.0 | -52.8 |
| 2,2-Dimethylbutane | -44.5 <sup>a</sup> | -26.0 | -37.6 | -39.6 | -38.0 | -39.1 | -32.6 | -42.8 | -52.7 | -51.7 | -51.6 | -40.7 | -49.3 | -54.0 |
| But-1-ene H-ecl    | 0.0 <sup>a</sup>   | -0.2  | 0.2   | 1.4   | 1.2   | -0.4  | -0.7  | 0.1   | -3.6  | -3.8  | -3.8  | 0.3   | -2.4  | -5.7  |
| cis-2-Butene       | -1.7 <sup>a</sup>  | -3.9  | -2.2  | -3.6  | -2.5  | -3.9  | -1.1  | -1.9  | -5.5  | -5.8  | -5.8  | -2.2  | -4.8  | -8.2  |
| trans-2-Butene     | -2.7 <sup>a</sup>  | -5.1  | -3.3  | -3.8  | -3.5  | -5.1  | -3.1  | -3.8  | -7.2  | -7.5  | -7.5  | -4.0  | -6.4  | -9.8  |
| Isobutene          | -4.0 <sup>a</sup>  | -2.0  | -1.2  | -3.3  | -5.1  | -5.6  | -0.4  | -4.3  | -8.0  | -8.2  | -8.2  | -3.9  | -6.7  | -10.1 |
| 1-Butyne           | 39.5 <sup>a</sup>  | 36.1  | 37.5  | 35.7  | 41.2  | 41.7  | 39.9  | 39.5  | 36.8  | 36.5  | 36.5  | 39.2  | 37.5  | 34.6  |
| 2-Butyne           | 34.8 <sup>a</sup>  | 24.9  | 32.0  | 29.8  | 35.1  | 35.3  | 36.5  | 35.1  | 33.0  | 32.4  | 32.4  | 33.8  | 32.6  | 29.6  |
| Cyclooctatetraene  | 70.7 <sup>a</sup>  | 56.2  | 63.5  | 66.7  | 58.6  | 60.2  | 72.0  | 75.2  | 67.9  | 67.2  | 67.2  | 73.9  | 69.3  | 61.6  |
| Dimethylamine      | -4.4 <sup>a</sup>  | -6.6  | -5.6  | -7.9  | -3.1  | -4.2  | -4.7  | -5.1  | -7.7  | -7.9  | -7.9  | -2.2  | -4.3  | -6.5  |
| Ethylamine         | -11.3 <sup>a</sup> | -13.2 | -15.1 | -12.5 | -11.2 | -11.3 | -9.3  | -8.9  | -11.5 | -11.7 | -11.7 | -12.1 | -14.1 | -16.5 |
| Acetonitrile       | 18.0 <sup>b</sup>  | 19.2  | 19.3  | 23.3  | 20.5  | 18.2  | 16.5  | 17.5  | 16.5  | 16.2  | 16.2  | 15.3  | 14.8  | 13.2  |
| Methylisocyanide   | 39.1 <sup>a</sup>  | 60.3  | 50.4  | 54.7  | 45.5  | 38.9  | 27.8  | 38.3  | 37.3  | 36.9  | 36.9  | 26.7  | 26.1  | 24.4  |
| Propanol           | -61.0 <sup>a</sup> | -67.7 | -69.5 | -62.2 | -60.1 | -61.1 | -64.9 | -61.9 | -65.6 | -65.6 | -65.6 | -62.2 | -65.1 | -67.9 |
| Isopropanol        | -65.2 <sup>a</sup> | -65.1 | -69.5 | -65.8 | -67.2 | -67.2 | -63.8 | -66.7 | -70.6 | -70.5 | -70.5 | -67.2 | -70.3 | -73.1 |
| n-Butanol          | -65.7 <sup>a</sup> | -72.3 | -78.0 | -69.5 | -67.0 | -67.7 | -70.1 | -66.4 | -71.8 | -71.6 | -71.6 | -67.6 | -71.9 | -75.5 |
| Isobutanol         | -67.8 <sup>a</sup> | -68.7 | -75.4 | -69.4 | -67.2 | -67.7 | -67.8 | -67.5 | -73.4 | -73.4 | -73.0 | -68.1 | -73.2 | -76.7 |
| 2-Butanol          | -70.0 <sup>a</sup> | -69.4 | -75.9 | -70.5 | -71.2 | -71.7 | -69.1 | -71.2 | -77.0 | -76.6 | -76.6 | -71.7 | -76.3 | -80.0 |
| tert-Butanol       | -74.7 <sup>a</sup> | -64.3 | -71.6 | -71.3 | -75.1 | -74.8 | -68.2 | -76.8 | -82.9 | -82.5 | -82.4 | -75.9 | -80.9 | -84.5 |
| Dimethylether      | -44.0 <sup>a</sup> | -51.2 | -53.2 | -48.3 | -45.8 | -45.0 | -43.8 | -45.6 | -47.7 | -47.7 | -47.7 | -42.8 | -44.5 | -46.2 |
| Ethanol            | -56.2 <sup>a</sup> | -63.0 | -62.7 | -56.9 | -54.9 | -55.9 | -59.5 | -56.9 | -59.0 | -59.1 | -59.1 | -57.2 | -58.8 | -60.8 |
| Relative energies  |                    |       |       |       |       |       |       |       |       |       |       |       |       |       |
| 2-Methylbutane     | -1.6 <sup>a</sup>  | -1.6  | -1.6  | -1.6  | -1.6  | -0.2  | -1.6  | -1.6  | -1.6  | -1.6  | -1.6  | -1.6  | -1.6  | -1.6  |
| Neopentane         | -5.1 <sup>a</sup>  | 9.8   | 5.2   | -1.4  | -4.0  | -2.2  | 6.2   | 4.9   | -6.0  | -5.7  | -5.6  | -2.5  | -3.8  | -3.5  |
| 3-Methylpentane    | -1.2 <sup>a</sup>  | 6.2   | 3.6   | 0.9   | 0.4   | 0.5   | 4.0   | -0.6  | -1.6  | -1.3  | -1.3  | 0.5   | -0.7  | -0.4  |
| 2-Methylpentane    | -1.8 <sup>a</sup>  | 4.6   | 2.6   | -0.1  | -0.7  | -0.3  | 3.0   | -1.2  | -1.9  | -1.7  | -1.7  | -0.3  | -1.1  | -0.9  |
| 2,3-Dimethylbutane | -2.7 <sup>a</sup>  | 11.4  | 6.0   | 0.7   | -0.4  | 0.3   | 6.6   | -1.9  | -3.4  | -2.9  | -2.8  | 0.2   | -1.5  | -1.1  |
| 2,2-Dimethylbutane | -4.5 <sup>a</sup>  | 13.1  | 7.2   | 0.3   | -2.0  | -0.7  | 8.1   | -3.5  | -5.3  | -4.8  | -4.7  | -0.7  | -2.8  | -2.3  |
| cis-2-Butene       | -1.7 <sup>a</sup>  | -3.6  | -2.4  | -5.0  | -3.7  | -3.4  | -0.5  | -2.0  | -2.0  | -2.0  | -2.0  | -2.5  | -2.5  | -2.6  |
| trans-2-Butene     | -2.7 <sup>a</sup>  | -4.8  | -3.5  | -5.2  | -4.6  | -4.6  | -2.5  | -3.9  | -3.6  | -3.7  | -3.7  | -4.3  | -4.0  | -4.1  |
| Isobutene          | -4.0 <sup>a</sup>  | -1.8  | -1.3  | -4.8  | -6.2  | -5.2  | 0.3   | 4.4   | -4.5  | -4.5  | -4.5  | -4.2  | -4.4  | -4.4  |
| 2-Butyne           | -4.7 <sup>a</sup>  | -11.2 | -5.5  | -5.9  | -6.0  | -6.3  | -3.3  | -4.4  | -3.8  | -4.0  | -4.1  | -5.4  | -4.9  | -4.9  |
| Ethylamine         | -6.9 <sup>a</sup>  | -6.6  | -9.5  | -4.6  | -8.1  | -7.1  | -4.6  | -3.7  | -3.9  | -3.8  | -3.8  | -9.8  | -9.8  | -10.0 |
| Methylisocyanide   | 21.1 <sup>a</sup>  | 41.1  | 31.1  | 31.4  | 25.0  | 20.7  | 11.3  | 20.8  | 20.8  | 20.7  | 20.7  | 11.4  | 11.3  | 11.2  |

... continued on next page ...

Table S14: . . . continued from previous page . . .

| Molecule     | Ref.               | MNDO  | AMI  | PM3  | PM6  | PM7   | OM2   |       | OM3   |       | OM3   |       | D3T   |
|--------------|--------------------|-------|------|------|------|-------|-------|-------|-------|-------|-------|-------|-------|
|              |                    |       |      |      |      |       | OM1   | D2    | D3    | D3T   | D2    | D3    |       |
| Isopropanol  | -4.2 <sup>a</sup>  | 2.6   | -0.0 | -3.6 | -7.1 | -6.1  | 1.1   | -4.7  | -5.0  | -4.9  | -4.9  | -5.0  | -5.3  |
| Isobutanol   | -2.1 <sup>a</sup>  | 3.6   | 2.6  | 0.1  | -0.3 | -0.0  | 2.3   | -1.1  | -1.6  | -1.5  | -1.5  | -0.5  | -1.2  |
| 2-Butanol    | -4.3 <sup>a</sup>  | 2.9   | 2.1  | -1.0 | -4.2 | -4.1  | 1.0   | -4.8  | -5.1  | -5.0  | -5.0  | -4.2  | -4.4  |
| tert-Butanol | -9.0 <sup>a</sup>  | 8.0   | 6.4  | -1.8 | -8.2 | -7.1  | 1.9   | -10.4 | -11.0 | -10.9 | -10.8 | -8.3  | -8.9  |
| Ethanol      | -12.2 <sup>a</sup> | -11.8 | -9.5 | -8.5 | -9.1 | -10.9 | -15.8 | -11.3 | -11.4 | -11.4 | -11.4 | -14.5 | -14.6 |

a J.B.Pedley, R.D.Naylor, and S.P.Kirby, "Thermochemical Data of Organic Compounds", 2nd ed., Chapman and Hall, London, 1986. b S.G.Lias, J.E.Bartmess, J.F.Liebman, J.L.Holmes, R.D.Levin, and W.G.Mallard, "Gas Phase Ion and Neutral Thermochemistry", J.Phys.Chem.Ref.Data 17, Suppl. 1 (1988).

Table S15: Benchmark Results for Fluorine91 Subset of OV57-CHNOF Data Set. Heats of Formation (kcal/mol)

| Molecule     | Ref.                | MNDO   | AM1    | PM3    | PM6    | PM7    | OM1    | OM2    |        | OM3    |        | D3T    |        |
|--------------|---------------------|--------|--------|--------|--------|--------|--------|--------|--------|--------|--------|--------|--------|
|              |                     |        |        |        |        |        |        | D2     | D3     | D2     | D3     |        |        |
| 2: CH3F      | -56.9 <sup>a</sup>  | -60.9  | -61.0  | -53.8  | -53.6  | -49.4  | -54.8  | -60.4  | -61.0  | -57.3  | -57.7  | -61.1  | -58.5  |
| 3: CH2F2     | -108.4 <sup>a</sup> | -111.8 | -116.1 | -103.8 | -104.7 | -98.1  | -104.7 | -110.9 | -111.6 | -107.0 | -107.0 | -111.6 | -107.8 |
| 4: CHF3      | -167.1 <sup>a</sup> | -163.8 | -172.5 | -162.0 | -162.7 | -157.1 | -160.6 | -166.8 | -167.6 | -162.4 | -162.4 | -167.6 | -163.3 |
| 5: CF4       | -223.9 <sup>a</sup> | -214.2 | -225.7 | -225.1 | -219.1 | -215.9 | -217.2 | -220.5 | -221.4 | -216.2 | -216.2 | -221.4 | -217.3 |
| 7: CH2F      | -7.7 <sup>a</sup>   | -33.3  | -31.1  | -19.9  | -20.4  | 16.5   | -11.0  | -13.6  | -14.0  | -13.4  | -13.4  | -14.1  | -13.9  |
| 8: CHF2      | -58.6 <sup>a</sup>  | -88.3  | -89.5  | -75.3  | -72.8  | -68.3  | -65.1  | -68.0  | -68.5  | -67.7  | -67.7  | -68.6  | -68.4  |
| 9: CF3       | -112.2 <sup>a</sup> | -137.0 | -142.8 | -132.1 | -125.9 | -123.8 | -120.4 | -123.2 | -123.7 | -122.8 | -122.8 | -123.8 | -123.6 |
| 11: CHF      | 34.8 <sup>a</sup>   | 21.5   | 20.9   | 35.3   | 27.3   | 25.3   | 26.1   | 24.9   | 24.7   | 24.4   | 24.4   | 24.6   | 23.9   |
| 12: CF2      | -46.6 <sup>a</sup>  | -65.2  | -68.0  | -49.1  | -63.0  | -69.6  | -56.0  | -57.8  | -58.1  | -55.7  | -55.8  | -58.1  | -56.3  |
| 14: CF       | 58.0 <sup>a</sup>   | 38.6   | 38.0   | 54.0   | 48.4   | 44.8   | 53.0   | 52.3   | 52.2   | 52.7   | 52.7   | 52.2   | 52.4   |
| 16: CHFO     | -92.0 <sup>a</sup>  | -88.8  | -92.9  | -88.8  | -84.4  | -84.5  | -87.3  | -86.3  | -86.8  | -88.2  | -88.4  | -86.9  | -89.2  |
| 17: CF2O     | -145.7 <sup>a</sup> | -138.6 | -146.3 | -141.6 | -139.7 | -138.8 | -137.1 | -136.5 | -137.0 | -138.7 | -138.8 | -137.1 | -139.7 |
| 19: CFO      | -42.7 <sup>a</sup>  | -50.0  | -55.9  | -55.0  | -56.3  | -55.1  | -52.5  | -50.7  | -50.9  | -54.5  | -54.5  | -51.1  | -55.1  |
| 21: CH2FOH   | -101.9 <sup>a</sup> | -109.9 | -115.0 | -102.6 | -102.3 | -98.2  | -102.0 | -103.2 | -104.2 | -100.6 | -101.3 | -104.2 | -102.3 |
| 22: CHF2OH   | -161.6 <sup>a</sup> | -164.4 | -174.8 | -161.2 | -163.1 | -158.5 | -159.3 | -162.5 | -163.7 | -157.8 | -158.5 | -163.7 | -159.7 |
| 23: CF3OH    | -218.3 <sup>a</sup> | -215.0 | -227.0 | -222.7 | -217.2 | -213.6 | -214.1 | -215.1 | -216.3 | -209.8 | -210.5 | -216.3 | -211.8 |
| 24: CH3OF    | -11.8               | -11.8  | -16.9  | -24.8  | -19.1  | -20.3  | -15.8  | -22.1  | -23.1  | -19.8  | -20.5  | -23.2  | -21.5  |
| 25: CH2FOF   | -71.2 <sup>a</sup>  | -63.1  | -72.0  | -73.9  | -70.8  | -66.6  | -62.7  | -71.3  | -72.5  | -66.4  | -67.2  | -72.5  | -68.3  |
| 26: CHF2OF   | -123.9 <sup>a</sup> | -115.5 | -127.9 | -130.2 | -127.0 | -122.8 | -114.5 | -123.5 | -124.8 | -117.0 | -117.8 | -124.7 | -119.0 |
| 27: CF3OF    | -178.0 <sup>a</sup> | -163.3 | -177.7 | -187.3 | -180.8 | -177.4 | -167.0 | -174.0 | -175.3 | -166.3 | -167.1 | -175.3 | -168.4 |
| 29: CH2FO    | -48.9 <sup>a</sup>  | -50.5  | -58.0  | -55.2  | -47.7  | -47.6  | -45.3  | -49.9  | -50.6  | -47.0  | -47.3  | -50.8  | -48.4  |
| 30: CHF2O    | -98.0 <sup>a</sup>  | -101.5 | -108.7 | -105.4 | -97.7  | -97.4  | -95.2  | -99.0  | -99.8  | -93.2  | -93.5  | -99.9  | -94.6  |
| 31: CF3O     | -151.2 <sup>a</sup> | -152.3 | -161.0 | -162.8 | -149.6 | -151.1 | -148.1 | -150.5 | -151.4 | -143.8 | -144.1 | -151.4 | -145.3 |
| 33: CHFOH    | -53.0 <sup>a</sup>  | -86.4  | -84.3  | -77.2  | -72.0  | -67.0  | -66.5  | -64.2  | -64.9  | -63.2  | -63.6  | -65.1  | -64.6  |
| 34: CF2OH    | -108.7 <sup>a</sup> | -138.7 | -141.6 | -133.8 | -129.0 | -125.8 | -122.4 | -122.6 | -123.4 | -120.3 | -120.7 | -123.5 | -121.7 |
| 35: CH2OF    | 26.1 <sup>a</sup>   | 16.9   | 16.6   | 6.2    | -8.1   | -6.6   | -7.8   | -17.0  | -17.7  | -12.0  | -12.5  | -17.8  | -13.4  |
| 36: CHFOF    | -15.3 <sup>a</sup>  | -36.4  | -38.9  | -41.4  | -39.7  | -33.7  | -24.3  | -28.8  | -29.6  | -24.6  | -25.1  | -29.7  | -26.0  |
| 38: CF3OOH   | -193.1 <sup>a</sup> | -189.4 | -195.8 | -201.8 | -185.4 | -189.0 | -188.8 | -193.9 | -195.6 | -185.7 | -186.7 | -195.5 | -188.3 |
| 40: CF3OO    | -152.9 <sup>a</sup> | -157.0 | -168.4 | -156.9 | -155.4 | -153.7 | -150.6 | -157.5 | -158.9 | -147.8 | -148.6 | -158.9 | -150.0 |
| 42: FCOOH    | -146.9 <sup>a</sup> | -143.1 | -149.2 | -145.3 | -140.3 | -139.0 | -140.4 | -136.4 | -137.1 | -137.1 | -137.5 | -137.3 | -138.7 |
| 44: FCOO-B2  | -86.5 <sup>a</sup>  | -74.1  | -77.0  | -82.2  | -70.8  | -73.4  | -74.6  | -70.0  | -70.4  | -66.5  | -66.6  | -70.7  | -67.7  |
| 46: CF2OHOH  | -212.3 <sup>a</sup> | -214.0 | -225.6 | -218.1 | -213.9 | -206.2 | -209.7 | -210.6 | -210.5 | -203.5 | -204.6 | -212.2 | -206.1 |
| 48: OCF2OH   | -146.9 <sup>a</sup> | -153.8 | -161.9 | -160.9 | -144.7 | -146.1 | -145.6 | -145.5 | -146.7 | -139.1 | -139.7 | -146.8 | -141.2 |
| 50: CH3CH2F  | -65.7 <sup>a</sup>  | -65.1  | -66.3  | -60.2  | -61.9  | -59.3  | -65.6  | -67.5  | -69.4  | -65.8  | -67.2  | -69.4  | -68.8  |
| 51: CH2FCH2F | -107.3 <sup>a</sup> | -109.7 | -114.3 | -100.5 | -104.9 | -97.6  | -108.9 | -111.3 | -113.3 | -106.9 | -108.3 | -113.1 | -109.9 |
| 52: CH3CHF2  | -121.3 <sup>a</sup> | -113.4 | -118.6 | -111.9 | -117.1 | -113.3 | -119.0 | -121.8 | -123.8 | -119.4 | -120.8 | -123.6 | -122.4 |
| 53: CHF2CH2F | -161.1 <sup>a</sup> | -157.5 | -165.4 | -152.0 | -157.5 | -149.6 | -160.7 | -164.1 | -166.3 | -159.0 | -160.5 | -166.0 | -162.1 |
| 54: CH3CF3   | -181.3 <sup>a</sup> | -164.4 | -172.6 | -172.3 | -176.6 | -174.8 | -176.9 | -178.4 | -180.6 | -176.3 | -177.7 | -180.4 | -179.4 |
| 55: CHF2CHF2 | -212.5 <sup>a</sup> | -204.6 | -215.0 | -202.0 | -207.2 | -199.4 | -210.0 | -213.2 | -215.6 | -206.0 | -207.7 | -215.2 | -209.2 |
| 56: CH2FCF3  | -219.0 <sup>a</sup> | -207.5 | -217.1 | -211.8 | -214.0 | -208.8 | -215.5 | -217.3 | -219.7 | -212.3 | -213.9 | -219.3 | -215.5 |
| 60: CH2FCH2  | -14.7 <sup>a</sup>  | -32.0  | -29.5  | -23.7  | -27.4  | -22.8  | -19.6  | -20.7  | -22.1  | -19.2  | -20.1  | -22.2  | -21.7  |
| 61: CH3CHF   | -18.2 <sup>a</sup>  | -43.0  | -39.6  | -32.1  | -33.9  | -31.6  | -25.5  | -25.9  | -27.3  | -27.1  | -28.0  | -27.4  | -29.5  |
| 62: CH2FCHF  | -58.1 <sup>a</sup>  | -87.0  | -86.3  | -71.5  | -75.8  | -68.6  | -67.6  | -68.8  | -70.3  | -67.5  | -68.5  | -70.3  | -70.0  |
| 63: CHF2CH2  | -68.3 <sup>a</sup>  | -79.6  | -79.6  | -73.2  | -79.3  | -73.5  | -70.8  | -72.6  | -74.1  | -70.0  | -70.9  | -74.1  | -72.5  |

... continued on next page ...

Table S15: ... continued from previous page ...

| Molecule     | Ref.                | MNDO   | AMI    | PM3    | PM6    | PM7    | OM1    |        | OM2    |        | OM3    |        | OM3    |        | D3T |
|--------------|---------------------|--------|--------|--------|--------|--------|--------|--------|--------|--------|--------|--------|--------|--------|-----|
|              |                     |        |        |        |        |        | D2     | D3     | D2     | D3     | D2     | D3     | D2     | D3     |     |
| 64: CH3CF2   | -71.9 <sup>a</sup>  | -96.1  | -94.0  | -86.7  | -86.9  | -85.1  | -81.2  | -81.9  | -83.4  | -83.4  | -83.2  | -84.2  | -85.7  | -85.7  |     |
| 65: CH2FCF2  | -110.0 <sup>a</sup> | -138.7 | -138.6 | -125.5 | -125.1 | -119.4 | -120.0 | -121.4 | -123.0 | -123.0 | -119.5 | -120.6 | -122.1 | -122.1 |     |
| 66: CHF2CHF  | -110.6 <sup>a</sup> | -134.0 | -135.3 | -121.4 | -125.7 | -117.8 | -117.1 | -119.2 | -120.9 | -120.8 | -115.8 | -116.9 | -118.4 | -118.4 |     |
| 67: CF3CHF   | -127.3 <sup>a</sup> | -129.6 | -131.4 | -131.2 | -136.4 | -132.5 | -126.6 | -127.3 | -129.0 | -129.0 | -124.3 | -125.2 | -126.9 | -126.9 |     |
| 68: CF3CHF   | -168.3 <sup>a</sup> | -183.1 | -186.2 | -178.9 | -181.0 | -175.6 | -171.3 | -172.1 | -174.0 | -173.8 | -168.8 | -169.9 | -171.5 | -171.5 |     |
| 69: CHF2CF2  | -160.3 <sup>a</sup> | -184.0 | -186.6 | -172.4 | -173.2 | -166.4 | -168.1 | -169.9 | -171.8 | -171.6 | -165.9 | -167.1 | -168.6 | -168.6 |     |
| 72: CH2CHF   | -34.4 <sup>a</sup>  | -34.5  | -34.0  | -28.6  | -33.3  | -32.3  | -33.1  | -32.3  | -33.3  | -33.5  | -32.2  | -32.7  | -34.1  | -34.1  |     |
| 73: CHFCHF-Z | -73.8 <sup>a</sup>  | -83.1  | -82.7  | -71.5  | -77.5  | -73.7  | -74.7  | -74.3  | -75.5  | -75.6  | -72.7  | -73.4  | -74.8  | -74.8  |     |
| 74: CHFCHF-E | -74.5 <sup>a</sup>  | -83.6  | -82.7  | -73.0  | -76.6  | -73.6  | -73.0  | -72.2  | -73.4  | -73.5  | -71.7  | -72.3  | -73.7  | -73.7  |     |
| 75: CH2CF2   | -84.5 <sup>a</sup>  | -84.1  | -84.3  | -79.6  | -85.1  | -84.4  | -80.3  | -78.4  | -79.5  | -79.6  | -79.9  | -80.5  | -81.9  | -81.9  |     |
| 76: CHF2CF2  | -120.1 <sup>a</sup> | -131.1 | -130.6 | -121.5 | -125.0 | -122.0 | -117.6 | -116.4 | -117.7 | -117.7 | -115.9 | -116.6 | -118.0 | -118.0 |     |
| 77: CF2CF2   | -162.3 <sup>a</sup> | -175.7 | -175.1 | -168.2 | -169.1 | -166.5 | -158.3 | -158.5 | -159.9 | -159.8 | -155.9 | -156.7 | -158.2 | -158.2 |     |
| 79: CH2FCH   | 40.7 <sup>a</sup>   | 43.7   | 39.8   | 47.7   | 34.9   | 37.6   | 32.6   | 30.9   | 29.8   | 29.7   | 30.2   | 29.6   | 28.2   | 28.2   |     |
| 81: CF3OH    | -58.2 <sup>a</sup>  | -48.0  | -51.9  | -48.2  | -63.3  | -62.1  | -62.0  | -60.9  | -62.3  | -62.2  | -57.8  | -58.5  | -60.0  | -60.0  |     |
| 82: CH3CF    | 17.9 <sup>a</sup>   | 8.2    | 5.5    | 13.8   | -0.7   | -3.2   | -1.8   | -3.9   | -4.9   | -5.1   | -3.8   | -4.4   | -5.8   | -5.8   |     |
| 83: CH2FCF   | -21.7 <sup>a</sup>  | -34.1  | -37.5  | -21.7  | -38.4  | -36.9  | -39.1  | -41.9  | -43.1  | -43.1  | -38.4  | -39.1  | -40.4  | -40.4  |     |
| 84: CHF2CF   | -67.7 <sup>a</sup>  | -82.2  | -87.1  | -70.9  | -85.7  | -84.6  | -85.6  | -87.4  | -88.8  | -88.7  | -82.7  | -83.4  | -84.8  | -84.8  |     |
| 85: CF3CF    | -124.0 <sup>a</sup> | -131.6 | -137.4 | -126.4 | -141.0 | -143.1 | -138.9 | -138.8 | -140.3 | -140.2 | -133.1 | -133.9 | -135.4 | -135.4 |     |
| 87: CHFCH-Z  | 28.7 <sup>a</sup>   | 16.6   | 19.2   | 22.4   | 20.4   | 24.0   | 26.7   | 27.1   | 26.4   | 26.2   | 26.9   | 26.6   | 25.4   | 25.4   |     |
| 88: CHFCH-E  | 28.3 <sup>a</sup>   | 16.6   | 19.2   | 22.4   | 20.4   | 24.0   | 26.7   | 27.1   | 26.4   | 26.2   | 26.9   | 26.6   | 25.4   | 25.4   |     |
| 89: CH2CF    | 26.0 <sup>a</sup>   | 12.1   | 12.1   | 18.6   | 13.4   | 15.0   | 19.6   | 20.2   | 19.5   | 19.3   | 17.2   | 16.8   | 15.7   | 15.7   |     |
| 90: CHF2CF-Z | -10.8 <sup>a</sup>  | -34.1  | -33.1  | -21.3  | -26.2  | -21.7  | -16.9  | -16.7  | -17.5  | -17.7  | -18.4  | -18.8  | -20.0  | -20.0  |     |
| 91: CHF2CF-E | -10.4 <sup>a</sup>  | -33.4  | -31.8  | -19.0  | -25.9  | -21.1  | -16.9  | -17.0  | -17.8  | -17.9  | -18.1  | -18.5  | -19.7  | -19.7  |     |
| 92: CF2OH    | -18.7 <sup>a</sup>  | -30.5  | -26.9  | -24.5  | -27.2  | -23.7  | -16.1  | -14.9  | -15.7  | -15.8  | -16.3  | -16.6  | -17.8  | -17.8  |     |
| 93: CF2CF    | -64.0 <sup>a</sup>  | -78.2  | -76.8  | -66.1  | -62.3  | -65.7  | -57.3  | -56.9  | -57.8  | -57.8  | -58.7  | -59.1  | -60.3  | -60.3  |     |
| 95: CH2FC    | 78.8 <sup>a</sup>   | 79.4   | 75.8   | 80.0   | 71.1   | 74.6   | 67.6   | 65.1   | 64.3   | 64.1   | 66.5   | 66.1   | 64.8   | 64.8   |     |
| 96: CHF2C    | 36.1 <sup>a</sup>   | 34.1   | 30.7   | 36.7   | 25.0   | 28.9   | 24.0   | 22.0   | 21.1   | 21.0   | 25.3   | 24.9   | 23.6   | 23.6   |     |
| 97: CF3C     | -18.4 <sup>a</sup>  | -15.2  | -18.1  | -16.7  | -29.6  | -28.6  | -27.3  | -26.5  | -27.6  | -27.6  | -21.9  | -22.2  | -23.7  | -23.7  |     |
| 99: HCCF     | 24.8 <sup>a</sup>   | 15.7   | 15.2   | 18.1   | 21.4   | 23.5   | 26.7   | 26.9   | 26.4   | 26.2   | 23.9   | 23.8   | 22.9   | 22.9   |     |
| 100: FCCF    | 0.0 <sup>a</sup>    | -21.0  | -19.6  | -11.6  | -9.2   | -5.7   | 4.0    | 4.4    | 3.9    | 3.8    | -2.6   | -2.8   | -3.7   | -3.7   |     |
| 102: CHFC    | 71.5 <sup>a</sup>   | 79.7   | 74.6   | 78.5   | 63.2   | 63.7   | 59.2   | 58.6   | 58.1   | 57.8   | 61.0   | 60.8   | 59.8   | 59.8   |     |
| 103: CF2C    | 30.4 <sup>a</sup>   | 34.5   | 31.9   | 36.7   | 21.2   | 21.3   | 23.1   | 22.2   | 21.6   | 21.4   | 26.5   | 26.4   | 25.3   | 25.3   |     |
| 105: CCF     | 109.3 <sup>a</sup>  | 108.9  | 103.0  | 114.6  | 104.7  | 107.9  | 101.8  | 94.0   | 93.7   | 93.5   | 97.7   | 97.6   | 96.9   | 96.9   |     |
| 107: CHF2CO  | -38.8 <sup>a</sup>  | -50.3  | -46.5  | -45.1  | -52.9  | -51.0  | -43.4  | -37.8  | -38.5  | -38.8  | -42.5  | -42.8  | -44.1  | -44.1  |     |
| 108: CF2CO   | -75.0 <sup>a</sup>  | -92.5  | -89.8  | -88.4  | -94.4  | -91.6  | -99.0  | -96.6  | -97.5  | -97.7  | -93.5  | -93.9  | -95.3  | -95.3  |     |
| 110: CF2CO   | 19.3 <sup>a</sup>   | -4.8   | -4.3   | -0.2   | -8.7   | -4.5   | -9.9   | -7.8   | -8.3   | -8.5   | -7.3   | -7.5   | -8.6   | -8.6   |     |
| 112: CH2FCHO | -86.4 <sup>a</sup>  | -86.4  | -88.4  | -83.8  | -79.1  | -78.4  | -88.2  | -87.8  | -89.3  | -89.4  | -87.8  | -88.8  | -90.5  | -90.5  |     |
| 113: CHF2CHO | -130.4 <sup>a</sup> | -133.4 | -136.7 | -132.0 | -127.6 | -126.6 | -136.8 | -135.7 | -137.5 | -137.5 | -133.6 | -134.6 | -136.4 | -136.4 |     |
| 114: CF3CHO  | -186.5 <sup>a</sup> | -183.1 | -187.5 | -190.4 | -182.4 | -184.7 | -190.9 | -188.1 | -189.9 | -189.9 | -186.3 | -187.4 | -189.2 | -189.2 |     |
| 115: CH3CFO  | -105.8 <sup>a</sup> | -96.5  | -98.8  | -98.7  | -100.7 | -100.9 | -99.8  | -100.0 | -101.5 | -101.6 | -103.0 | -104.0 | -105.7 | -105.7 |     |
| 116: CH2FCFO | -143.6 <sup>a</sup> | -138.6 | -142.1 | -135.8 | -137.8 | -134.9 | -139.0 | -139.2 | -140.9 | -140.9 | -139.7 | -140.7 | -142.4 | -142.4 |     |
| 117: CHF2CFO | -190.7 <sup>a</sup> | -184.2 | -189.6 | -183.8 | -184.0 | -181.7 | -186.6 | -187.1 | -189.0 | -188.9 | -186.2 | -187.2 | -189.0 | -189.0 |     |
| 118: CF3CFO  | -246.3 <sup>a</sup> | -230.7 | -237.6 | -239.6 | -236.6 | -236.9 | -239.5 | -238.5 | -240.5 | -240.3 | -237.3 | -238.5 | -240.3 | -240.3 |     |
| 120: CH2FCO  | -41.9 <sup>a</sup>  | -56.5  | -54.9  | -55.7  | -58.3  | -52.4  | -59.3  | -57.4  | -58.6  | -58.7  | -58.7  | -59.4  | -60.9  | -60.9  |     |
| 121: CHF2CO  | -90.3 <sup>a</sup>  | -100.8 | -100.8 | -102.2 | -106.8 | -100.7 | -108.4 | -105.9 | -107.2 | -107.2 | -105.7 | -106.3 | -107.9 | -107.9 |     |

... continued on next page ...

Table S15: ... continued from previous page ...

| Molecule                           | Ref.                | MNDO   | AM1    | PM3    | PM6    | PM7    | OM1    |        | OM2    |        | OM3    |        | OM3    |        |
|------------------------------------|---------------------|--------|--------|--------|--------|--------|--------|--------|--------|--------|--------|--------|--------|--------|
|                                    |                     |        |        |        |        |        | D2     | D3     | D2     | D3     | D2     | D3     | D2     | D3     |
| 122: CF <sub>3</sub> CO            | -145.6 <sup>a</sup> | -149.2 | -151.5 | -160.8 | -160.6 | -156.8 | -162.4 | -158.3 | -159.7 | -159.7 | -157.5 | -158.1 | -159.8 | -159.8 |
| 125: C <sub>3</sub> F <sub>6</sub> | -277.6 <sup>a</sup> | -272.4 | -277.5 | -276.4 | -281.5 | -277.8 | -273.3 | -272.8 | -276.1 | -275.6 | -269.4 | -271.5 | -273.8 | -273.8 |

<sup>a</sup> N.L.Haworth, M.H.Smith, G.B.Bacskay, and J.C.Mackie, J.Phys.Chem.A 104, 7600 (2000).

Notes: (i) SCF convergence criteria were decreased to iscf=iplscf=7 for calculations of CF<sub>3</sub>O. with MNDO, OM3, OM3-D2, OM3-D3, OM3-D3T; (ii) SCF convergence criteria were decreased to iscf=iplscf=7 for calculations of CF<sub>3</sub>C. with MNDO; (iii) SCF convergence criteria were decreased to iscf=iplscf=6 and convergence criterion for optimization (gradient norm) was decreased to 1.0 kcal/(mol.Å) for calculations of FCOO. with OMI (in this case EF optimization algorithm was used instead of BFGS).

Table S16: Benchmark Results for G2 Subset of G2G3-CHNOF Data Set. Heats of Formation (kcal/mol)

| Molecule                          | Ref.                | MNDO   | AM1    | PM3    | PM6    | PM7    | OM1    | OM2    |        | OM3    |        | D3T    | OM3    | D3     | D3T    |
|-----------------------------------|---------------------|--------|--------|--------|--------|--------|--------|--------|--------|--------|--------|--------|--------|--------|--------|
|                                   |                     |        |        |        |        |        |        | D2     | D3     | D2     | D3     |        |        |        |        |
| CH radical, doublet, C0v          | 142.5 <sup>a</sup>  | 143.6  | 145.0  | 146.8  | 141.5  | 139.2  | 137.3  | 140.0  | 140.0  | 138.1  | 139.9  | 139.9  | 138.1  | 137.9  | 137.9  |
| Triplet methylene (CH2), C2v, 3-B | 93.7 <sup>a</sup>   | 77.3   | 80.8   | 75.6   | 75.2   | 79.6   | 91.3   | 91.9   | 91.7   | 90.1   | 91.6   | 91.6   | 90.3   | 89.8   | 89.8   |
| Singlet methylene (CH2), C2v, 1-A | 102.8 <sup>a</sup>  | 107.4  | 110.9  | 113.2  | 105.9  | 102.9  | 102.0  | 103.9  | 103.8  | 101.2  | 103.7  | 103.7  | 101.3  | 100.8  | 100.8  |
| Methyl radical (CH3), D3h         | 35.0 <sup>a</sup>   | 25.8   | 31.3   | 29.8   | 28.5   | 28.3   | 36.8   | 33.7   | 33.4   | 35.0   | 33.3   | 33.3   | 35.2   | 34.5   | 34.5   |
| Methane (CH4), Td                 | -17.9 <sup>a</sup>  | -11.9  | -8.8   | -13.0  | -12.3  | -14.4  | -13.8  | -19.3  | -19.8  | -18.4  | -19.9  | -19.9  | -18.0  | -19.1  | -19.1  |
| NH, triplet, C0v                  | 85.2 <sup>a</sup>   | 76.3   | 77.8   | 73.8   | 83.0   | 81.3   | 80.1   | 85.4   | 85.3   | 79.8   | 85.3   | 85.3   | 79.8   | 79.6   | 79.6   |
| NH2 radical, C2v, 2-B1            | 45.1 <sup>a</sup>   | 37.0   | 38.4   | 35.4   | 44.4   | 42.4   | 42.1   | 47.8   | 47.6   | 39.3   | 47.5   | 47.5   | 39.3   | 38.9   | 38.9   |
| Ammonia (NH3), C3v                | -11.0 <sup>a</sup>  | -6.4   | -7.3   | -3.1   | -3.1   | -4.3   | -3.8   | -5.9   | -6.1   | -11.2  | -6.3   | -6.3   | -11.2  | -12.0  | -12.0  |
| OH radical, C0v                   | 9.4 <sup>a</sup>    | 0.5    | 0.9    | 3.0    | 14.3   | 7.9    | 4.0    | 5.3    | 5.3    | 4.3    | 5.3    | 5.3    | 4.3    | 4.2    | 4.2    |
| Water (H2O), C2v                  | -57.8 <sup>a</sup>  | -60.9  | -59.2  | -53.4  | -54.3  | -57.8  | -56.7  | -56.5  | -56.6  | -58.5  | -56.7  | -56.7  | -58.5  | -58.8  | -58.8  |
| Hydrogen fluoride (HF), C0v       | -65.1 <sup>a</sup>  | -59.7  | -74.3  | -62.7  | -63.6  | -61.9  | -69.7  | -63.3  | -63.3  | -64.9  | -63.4  | -63.4  | -64.9  | -65.0  | -65.0  |
| Acetylene (C2H2), D0h             | 54.2 <sup>a</sup>   | 57.9   | 54.8   | 50.7   | 56.7   | 57.1   | 53.6   | 54.2   | 53.9   | 54.6   | 53.6   | 53.6   | 54.7   | 53.7   | 53.7   |
| Ethylene (H2C=CH2), D2h           | 12.5 <sup>a</sup>   | 15.4   | 16.5   | 16.6   | 15.7   | 13.9   | 11.9   | 12.9   | 12.0   | 13.4   | 11.7   | 11.7   | 13.9   | 12.0   | 12.0   |
| Ethane (H3C-CH3), D3d             | -20.1 <sup>a</sup>  | -19.7  | -17.4  | -18.1  | -15.8  | -18.2  | -20.3  | -21.2  | -22.8  | -21.9  | -23.0  | -23.0  | -20.8  | -23.6  | -23.6  |
| Cyano radical (CN), C0v, 2-Sigma+ | 104.9 <sup>a</sup>  | 129.3  | 114.4  | 137.1  | 102.1  | 103.8  | 112.7  | 111.6  | 111.6  | 102.7  | 111.4  | 111.4  | 102.7  | 102.3  | 102.3  |
| Hydrogen cyanide (HCN), C0v       | 31.5 <sup>a</sup>   | 35.3   | 31.0   | 33.0   | 33.2   | 29.8   | 24.5   | 26.1   | 25.9   | 25.2   | 25.7   | 25.7   | 25.3   | 24.7   | 24.7   |
| Carbon monoxide (CO), C0v         | -26.4 <sup>a</sup>  | -5.9   | -5.7   | -19.7  | -13.7  | -18.3  | -30.5  | -20.3  | -20.4  | -21.5  | -20.5  | -20.5  | -21.5  | -21.8  | -21.8  |
| HCO radical, bent, Cs             | 10.0 <sup>a</sup>   | -0.3   | -1.0   | -9.3   | -3.6   | -2.5   | -6.3   | 0.1    | -0.1   | -4.4   | -0.3   | -0.3   | -4.4   | -4.9   | -4.9   |
| Formaldehyde (H2C=O), C2v         | -26.0 <sup>a</sup>  | -32.9  | -31.5  | -34.1  | -20.7  | -25.5  | -34.3  | -30.3  | -30.7  | -32.1  | -30.9  | -30.9  | -31.9  | -32.8  | -32.8  |
| Methanol (CH3-OH), Cs             | -48.0 <sup>a</sup>  | -57.4  | -57.0  | -51.9  | -48.3  | -48.9  | -51.0  | -49.3  | -50.2  | -50.4  | -50.3  | -50.3  | -49.8  | -51.4  | -51.4  |
| N2 molecule, D0h                  | 0.0 <sup>a</sup>    | 8.3    | 11.2   | 17.6   | 40.6   | 33.0   | -4.4   | 2.8    | 2.8    | 2.6    | 2.6    | 2.6    | 2.6    | 2.2    | 2.2    |
| Hydrazine (H2N-NH2), C2           | 22.8 <sup>a</sup>   | 14.2   | 13.7   | 20.7   | 15.2   | 15.3   | 15.2   | 18.5   | 17.7   | 15.9   | 17.4   | 17.4   | 16.5   | 14.7   | 14.7   |
| NO radical, C0v, 2-Pi             | 21.6 <sup>a</sup>   | -0.2   | 1.2    | 14.7   | 28.0   | 22.7   | 6.1    | 24.5   | 24.5   | 15.2   | 24.4   | 24.4   | 15.2   | 14.9   | 14.9   |
| O2 molecule, D0h, triplet         | 0.0 <sup>a</sup>    | -15.3  | -27.0  | -4.2   | -16.8  | -8.5   | -7.1   | 2.0    | 2.0    | -2.6   | 1.9    | 1.9    | -2.6   | -2.8   | -2.8   |
| Hydrogen peroxide (HO-OH), C2     | -32.5 <sup>a</sup>  | -38.2  | -35.3  | -40.8  | -24.0  | -30.2  | -36.4  | -35.3  | -35.7  | -37.0  | -35.8  | -35.8  | -36.9  | -37.6  | -37.6  |
| F2 molecule, D0h                  | 0.0 <sup>a</sup>    | 7.3    | -22.5  | -21.7  | 0.3    | -15.9  | 12.3   | 0.6    | 0.6    | -1.7   | 0.5    | 0.5    | -1.7   | -1.8   | -1.8   |
| Carbon dioxide (CO2), D0h         | -94.1 <sup>a</sup>  | -75.1  | -79.8  | -85.0  | -84.8  | -84.5  | -90.1  | -80.5  | -80.7  | -87.7  | -80.9  | -80.9  | -87.7  | -88.4  | -88.4  |
| CF4, Td                           | -223.0 <sup>a</sup> | -214.2 | -225.7 | -225.1 | -219.1 | -215.9 | -217.2 | -220.5 | -221.4 | -216.2 | -221.4 | -221.4 | -215.8 | -217.3 | -217.3 |
| COF2, C2v                         | -152.7 <sup>a</sup> | -138.6 | -146.3 | -141.6 | -139.7 | -138.8 | -137.1 | -136.5 | -137.0 | -138.7 | -137.1 | -137.1 | -138.7 | -139.7 | -139.7 |
| N2O, Cs                           | 19.6 <sup>a</sup>   | 31.0   | 28.5   | 25.4   | 27.9   | 28.0   | 19.7   | 21.2   | 21.0   | 20.7   | 20.8   | 20.8   | 20.7   | 19.9   | 19.9   |
| NF3, C3v                          | -31.6 <sup>a</sup>  | -34.2  | -40.0  | -24.4  | -29.2  | -28.2  | -36.2  | -30.1  | -30.6  | -36.1  | -30.7  | -30.7  | -35.9  | -36.9  | -36.9  |
| O3 (ozone), C2v                   | 34.1 <sup>a</sup>   | 48.5   | 37.8   | 51.1   | 43.5   | 34.5   | 48.4   | 37.9   | 37.7   | 48.7   | 37.5   | 37.5   | 48.7   | 48.1   | 48.1   |

... continued on next page ...

Table S16: . . . continued from previous page . . .

| Molecule                          | Ref.                | MNDO   | AMI    | PM3    | PM6    | PM7    | OM1    |        | OM2    |        | OM3    |        | OM3    |        |
|-----------------------------------|---------------------|--------|--------|--------|--------|--------|--------|--------|--------|--------|--------|--------|--------|--------|
|                                   |                     |        |        |        |        |        | D2     | D3     | D2     | D3     | D2     | D3     | D2     | D3     |
| F2O, C2v                          | 5.9 <sup>a</sup>    | 18.2   | 10.5   | -4.8   | 4.3    | 3.5    | 16.2   | 5.3    | 5.1    | 5.1    | 7.2    | 7.1    | 6.7    | 6.7    |
| C2F4 (F2C=CF2), D2h               | -157.4 <sup>a</sup> | -175.7 | -175.1 | -168.2 | -169.1 | -166.5 | -157.6 | -156.3 | -157.7 | -157.7 | -155.9 | -156.7 | -158.2 | -158.2 |
| CF3CN, C3v                        | -118.4 <sup>a</sup> | -113.2 | -119.5 | -115.0 | -120.9 | -118.4 | -126.7 | -125.5 | -126.9 | -127.0 | -125.1 | -125.7 | -127.5 | -127.5 |
| Propyne (C3H4), C3v               | 44.2 <sup>a</sup>   | 41.4   | 43.4   | 40.2   | 45.4   | 46.0   | 45.0   | 44.5   | 43.3   | 42.9   | 44.1   | 43.5   | 41.5   | 41.5   |
| Allene (C3H4), D2d                | 45.5 <sup>a</sup>   | 43.9   | 46.1   | 47.1   | 37.5   | 36.9   | 45.4   | 45.9   | 44.7   | 44.3   | 45.5   | 44.9   | 42.9   | 42.9   |
| Cyclopropene (C3H4), C2v          | 66.2 <sup>a</sup>   | 68.3   | 74.8   | 68.2   | 60.9   | 63.2   | 62.8   | 67.4   | 65.9   | 65.7   | 65.5   | 64.7   | 62.8   | 62.8   |
| Propene (C3H6), Cs                | 4.8 <sup>a</sup>    | 5.0    | 6.6    | 6.4    | 5.6    | 4.2    | 4.4    | 4.7    | 2.6    | 2.3    | 5.0    | 3.5    | 1.1    | 1.1    |
| Cyclopropane (C3H6), D3h          | 12.7 <sup>a</sup>   | 11.2   | 17.8   | 16.3   | 11.2   | 12.0   | 7.2    | 9.9    | 7.6    | 7.6    | 10.1   | 8.7    | 6.3    | 6.3    |
| Propane (C3H8), C2v               | -25.0 <sup>a</sup>  | -24.9  | -24.3  | -23.6  | -21.0  | -23.1  | -25.2  | -25.5  | -28.7  | -28.7  | -25.4  | -27.9  | -30.4  | -30.4  |
| Trans-1,3-butadiene (C4H6), C2h   | 26.3 <sup>a</sup>   | 29.0   | 29.9   | 31.0   | 28.5   | 27.2   | 28.2   | 29.4   | 26.8   | 26.3   | 30.3   | 28.6   | 25.5   | 25.5   |
| 2-Butyne (C4H6), D3h, eclipsed    | 34.8 <sup>a</sup>   | 24.9   | 32.0   | 29.8   | 35.1   | 35.3   | 36.5   | 35.1   | 33.0   | 32.4   | 33.8   | 32.6   | 29.6   | 29.6   |
| Methylenecyclopropane (C4H6), C2v | 47.9 <sup>a</sup>   | 37.9   | 47.7   | 44.5   | 35.9   | 38.2   | 42.2   | 45.0   | 42.3   | 42.0   | 43.7   | 42.2   | 39.1   | 39.1   |
| Bicyclo[1.1.0]butane (C4H6), C2v  | 51.9 <sup>a</sup>   | 64.1   | 78.1   | 69.2   | 59.5   | 65.5   | 59.0   | 62.0   | 58.9   | 59.0   | 59.9   | 57.9   | 55.2   | 55.2   |
| Cyclobutene (C4H6), C2v           | 37.4 <sup>a</sup>   | 31.0   | 45.8   | 37.7   | 33.8   | 37.2   | 39.0   | 41.3   | 38.4   | 38.2   | 40.8   | 38.9   | 35.8   | 35.8   |
| Cyclobutane (C4H8), D2d           | 6.8 <sup>a</sup>    | -11.9  | -1.0   | -3.8   | -3.5   | -2.3   | -1.9   | 3.0    | -1.1   | -1.0   | 2.9    | -0.0   | -3.3   | -3.3   |
| Isobutene (C4H8), C2v             | -4.0 <sup>a</sup>   | -2.0   | -1.2   | -3.3   | -5.0   | -5.6   | -0.4   | -4.3   | -8.0   | -8.2   | -3.9   | -6.7   | -10.1  | -10.0  |
| Trans-butane (C4H10), C2h         | -30.0 <sup>a</sup>  | -29.7  | -31.1  | -29.1  | -26.0  | -28.2  | -30.4  | -30.1  | -34.9  | -34.8  | -30.3  | -34.1  | -37.5  | -37.5  |
| Isobutane (C4H10), C3v            | -32.1 <sup>a</sup>  | -26.8  | -29.4  | -29.5  | -27.5  | -28.9  | -28.3  | -31.8  | -37.0  | -36.7  | -31.3  | -35.5  | -38.8  | -38.8  |
| Spiropentane (C5H8), D2d          | 44.3 <sup>a</sup>   | 33.7   | 50.5   | 43.1   | 33.2   | 38.5   | 38.4   | 42.8   | 38.2   | 38.4   | 41.0   | 38.1   | 34.3   | 34.3   |
| Benzene (C6H6), D6h               | 19.7 <sup>a</sup>   | 21.3   | 22.0   | 23.5   | 24.2   | 23.0   | 17.1   | 18.8   | 14.6   | 13.8   | 18.5   | 16.4   | 10.6   | 10.6   |
| Difluoromethane (HF2), C2v        | -107.7 <sup>a</sup> | -111.8 | -116.1 | -103.8 | -104.7 | -98.1  | -104.7 | -110.9 | -111.6 | -111.6 | -106.6 | -107.0 | -107.8 | -107.8 |
| Trifluoromethane (HCF3), C3v      | -166.6 <sup>a</sup> | -163.8 | -172.5 | -162.0 | -162.7 | -157.1 | -160.6 | -166.8 | -167.6 | -167.6 | -162.0 | -162.4 | -163.3 | -163.3 |
| Methylamine (H3C-NH2), Cs         | -5.5 <sup>a</sup>   | -7.5   | -7.4   | -5.2   | -2.4   | -3.4   | -4.7   | -4.1   | -5.3   | -5.6   | -5.8   | -6.6   | -8.1   | -8.1   |
| Acetonitrile (CH3-CN), C3v        | 18.0 <sup>a</sup>   | 19.2   | 19.3   | 23.3   | 20.5   | 18.2   | 16.5   | 17.5   | 16.5   | 16.2   | 15.3   | 14.8   | 13.2   | 13.2   |
| Nitromethane (CH3-NO2), Cs        | -17.8 <sup>a</sup>  | 3.3    | -9.9   | -15.9  | -16.3  | -17.2  | -6.9   | -17.3  | -18.8  | -19.1  | -15.7  | -16.7  | -18.5  | -18.5  |
| Methylnitrite (CH3-O-N=O), NOCH t | -15.9 <sup>a</sup>  | -34.4  | -36.7  | -6.3   | -22.6  | -25.0  | -25.2  | -23.4  | -24.8  | -25.1  | -25.9  | -27.0  | -28.7  | -28.7  |
| Formic acid (HCOOH), HOCO cis, Cs | -90.5 <sup>a</sup>  | -92.6  | -97.4  | -94.4  | -87.9  | -89.5  | -91.7  | -86.9  | -87.5  | -87.8  | -88.2  | -88.6  | -89.7  | -89.7  |
| Methyl formate (HCOOCH3), OCOC ci | -85.0 <sup>a</sup>  | -85.5  | -91.0  | -87.0  | -84.4  | -84.0  | -83.5  | -81.4  | -83.3  | -83.5  | -79.4  | -80.6  | -82.6  | -82.6  |
| Acetamide (CH3CONH2), C1          | -57.0 <sup>a</sup>  | -48.2  | -50.7  | -51.0  | -55.1  | -56.6  | -47.7  | -50.7  | -52.8  | -53.2  | -57.4  | -58.9  | -61.4  | -61.4  |

. . . continued on next page . . .



Table S16: ... continued from previous page ...

| Molecule                                                                  | Ref.                | MNDO   | AMI    | PM3    | PM6    | PM7    | OM1    |        | OM2    |        | OM3    |        | OM3    |        |        |
|---------------------------------------------------------------------------|---------------------|--------|--------|--------|--------|--------|--------|--------|--------|--------|--------|--------|--------|--------|--------|
|                                                                           |                     |        |        |        |        |        | D2     | D3     | D2     | D3     | D2     | D3     | D2     | D3     |        |
| Aziridine (cyclic CH <sub>2</sub> -NH-CH <sub>2</sub> ring)               | 30.2 <sup>a</sup>   | 25.1   | 33.1   | 31.6   | 29.6   | 32.3   | 30.6   | 36.3   | 34.5   | 34.3   | 34.3   | 35.4   | 34.3   | 32.2   | 32.3   |
| Cyanogen (NCCN), D0h                                                      | 73.3 <sup>a</sup>   | 66.6   | 67.9   | 77.5   | 74.2   | 71.5   | 72.3   | 74.8   | 74.3   | 73.9   | 73.9   | 68.2   | 68.0   | 66.7   | 66.7   |
| Dimethylamine, (CH <sub>3</sub> ) <sub>2</sub> NH, Cs                     | -4.4 <sup>a</sup>   | -6.6   | -5.6   | -7.9   | -3.1   | -4.2   | -4.7   | -5.1   | -7.7   | -7.9   | -7.9   | -2.2   | -4.3   | -6.5   | -6.5   |
| Trans-ethylamine (CH <sub>3</sub> -CH <sub>2</sub> -NH <sub>2</sub> ), C  | -11.3 <sup>a</sup>  | -13.2  | -15.1  | -12.5  | -11.2  | -11.3  | -9.3   | -8.9   | -11.5  | -11.7  | -11.7  | -12.1  | -14.1  | -16.5  | -16.5  |
| Ketene (H <sub>2</sub> C=C=O), C <sub>2v</sub>                            | -11.4 <sup>a</sup>  | -6.8   | -5.7   | -9.2   | -18.5  | -18.8  | -9.9   | -5.1   | -5.7   | -6.1   | -6.1   | -11.0  | -11.3  | -12.6  | -12.6  |
| Oxirane (cyclic CH <sub>2</sub> -O-CH <sub>2</sub> ), C <sub>2v</sub>     | -12.6 <sup>a</sup>  | -15.5  | -9.0   | -8.1   | -10.1  | -11.3  | -15.7  | -13.3  | -14.6  | -14.8  | -14.8  | -8.8   | -9.7   | -11.2  | -11.2  |
| Acetaldehyde (CH <sub>3</sub> CHO), Cs                                    | -39.7 <sup>a</sup>  | -42.3  | -41.6  | -44.2  | -38.2  | -41.1  | -45.2  | -44.2  | -45.5  | -45.8  | -45.8  | -46.5  | -47.3  | -49.1  | -49.1  |
| Glyoxal (O=CH-CH=O), trans, C <sub>2h</sub>                               | -50.7 <sup>a</sup>  | -61.4  | -58.7  | -64.3  | -45.8  | -52.5  | -62.9  | -59.1  | -60.3  | -60.6  | -60.6  | -61.8  | -62.5  | -64.2  | -64.2  |
| Ethanol (CH <sub>3</sub> CH <sub>2</sub> OH), trans, Cs                   | -56.2 <sup>a</sup>  | -63.0  | -62.7  | -56.9  | -54.9  | -55.9  | -59.5  | -56.9  | -59.0  | -59.1  | -59.1  | -57.2  | -58.8  | -60.8  | -60.8  |
| Dimethyl ether (CH <sub>3</sub> -O-CH <sub>3</sub> ), C <sub>2v</sub>     | -44.0 <sup>a</sup>  | -51.2  | -53.2  | -48.3  | -45.8  | -45.0  | -43.8  | -45.6  | -47.7  | -47.7  | -47.7  | -42.8  | -44.5  | -46.2  | -46.2  |
| Vinyl fluoride (H <sub>2</sub> C=CHF), Cs                                 | -33.2 <sup>a</sup>  | -34.5  | -34.0  | -28.6  | -33.3  | -32.3  | -33.1  | -32.3  | -33.3  | -33.5  | -33.5  | -32.2  | -32.7  | -34.1  | -34.1  |
| Acrylonitrile (H <sub>2</sub> C=CHCN), Cs                                 | 43.2 <sup>a</sup>   | 43.8   | 45.0   | 50.2   | 46.0   | 43.8   | 43.3   | 45.6   | 44.2   | 43.6   | 43.6   | 43.7   | 42.9   | 40.5   | 40.5   |
| Acetone (CH <sub>3</sub> -CO-CH <sub>3</sub> ), C <sub>2v</sub>           | -51.9 <sup>a</sup>  | -49.4  | -49.2  | -53.3  | -54.4  | -55.5  | -52.4  | -57.4  | -60.1  | -60.4  | -60.4  | -59.3  | -61.2  | -63.9  | -63.9  |
| Acetic acid (CH <sub>3</sub> COOH), single bon                            | -103.4 <sup>a</sup> | -101.1 | -103.0 | -102.0 | -101.1 | -102.2 | -101.3 | -101.0 | -102.7 | -103.0 | -103.0 | -102.7 | -103.8 | -106.0 | -106.0 |
| Acetyl fluoride (CH <sub>3</sub> COF), HCCO ci                            | -105.7 <sup>a</sup> | -96.5  | -98.8  | -98.7  | -100.7 | -100.9 | -99.8  | -100.0 | -101.5 | -101.6 | -101.6 | -103.0 | -104.0 | -105.7 | -105.7 |
| Isopropanol, (CH <sub>3</sub> ) <sub>2</sub> CH-OH, gauche                | -65.2 <sup>a</sup>  | -65.4  | -68.0  | -63.9  | -64.9  | -65.4  | -65.1  | -66.3  | -70.2  | -70.1  | -70.1  | -66.6  | -69.7  | -72.5  | -72.5  |
| Methyl ethyl ether (CH <sub>3</sub> -CH <sub>2</sub> -O-CH <sub>3</sub> ) | -51.7 <sup>a</sup>  | -56.6  | -58.8  | -52.9  | -52.2  | -51.9  | -52.6  | -53.4  | -56.8  | -56.8  | -56.8  | -50.6  | -53.3  | -56.0  | -56.0  |
| Trimethyl amine, (CH <sub>3</sub> ) <sub>3</sub> N, C <sub>3v</sub>       | -5.7 <sup>a</sup>   | -2.8   | -1.7   | -10.9  | -4.4   | -6.2   | -3.5   | -8.0   | -12.4  | -12.4  | -12.4  | -0.1   | -3.8   | -6.7   | -6.7   |
| Furan (cyclic C <sub>4</sub> H <sub>4</sub> O), C <sub>2v</sub>           | -8.3 <sup>a</sup>   | -8.6   | 3.0    | -4.0   | -8.3   | -5.7   | -1.8   | -2.9   | -5.2   | -5.9   | -5.9   | -2.7   | -3.8   | -7.4   | -7.4   |
| Pyrrrole (planar cyclic C <sub>4</sub> H <sub>4</sub> NH), C              | 25.9 <sup>a</sup>   | 32.5   | 39.9   | 27.1   | 25.8   | 26.5   | 37.2   | 33.7   | 31.0   | 30.2   | 30.2   | 32.0   | 30.5   | 26.3   | 26.3   |
| Pyridine (cyclic C <sub>5</sub> H <sub>5</sub> N), C <sub>2v</sub>        | 33.6 <sup>a</sup>   | 28.8   | 32.0   | 30.4   | 33.9   | 31.7   | 33.0   | 30.8   | 27.1   | 26.3   | 26.3   | 29.4   | 27.6   | 22.2   | 22.3   |
| H <sub>2</sub> molecule, D <sub>0h</sub>                                  | 0.0 <sup>a</sup>    | 0.7    | -5.2   | -13.4  | -25.7  | -32.0  | 2.6    | -3.4   | -3.5   | -3.5   | -3.5   | -0.0   | -0.0   | -0.1   | -0.1   |
| CCH radical, C <sub>0v</sub>                                              | 135.1 <sup>a</sup>  | 162.7  | 159.4  | 156.4  | 134.2  | 137.7  | 140.8  | 139.6  | 139.3  | 139.1  | 139.1  | 141.1  | 141.1  | 140.4  | 140.4  |
| C <sub>2</sub> H <sub>3</sub> radical, Cs, 2-A'                           | 71.6 <sup>a</sup>   | 63.8   | 64.8   | 63.0   | 57.4   | 58.0   | 66.0   | 67.4   | 66.8   | 66.6   | 66.6   | 66.4   | 66.1   | 64.9   | 64.9   |
| CH <sub>3</sub> CO radical, HCCO cis, Cs, 2-A'                            | -2.4 <sup>a</sup>   | -14.4  | -11.7  | -19.0  | -19.5  | -17.9  | -19.0  | -16.0  | -17.0  | -17.2  | -17.2  | -19.9  | -20.4  | -21.9  | -21.9  |

... continued on next page ...

Table S16: ... continued from previous page ...

| Molecule                             | Ref.              | MNDO  | AM1   | PM3   | PM6   | PM7   | OM1   |       | OM2   |       | OM3   |       | OM3   |       |
|--------------------------------------|-------------------|-------|-------|-------|-------|-------|-------|-------|-------|-------|-------|-------|-------|-------|
|                                      |                   |       |       |       |       |       | D2    | D3    | D2    | D3    | D2    | D3    | D2    | D3    |
| H2COH radical, C1                    | -4.1 <sup>a</sup> | -31.7 | -26.5 | -23.5 | -23.3 | -20.9 | -14.4 | -10.8 | -11.3 | -11.5 | -12.2 | -12.6 | -13.5 | -13.5 |
| CH3O radical, Cs, 2-A'               | 4.1 <sup>a</sup>  | -0.2  | -3.7  | -6.8  | 5.2   | 0.2   | 2.7   | 0.4   | -0.2  | -0.4  | 1.3   | 0.9   | -0.0  | -0.0  |
| CH3CH2O radical, Cs,<br>2-A''        | -3.7 <sup>a</sup> | -5.8  | -9.5  | -12.3 | -2.4  | -7.6  | -3.8  | -5.6  | -7.4  | -7.6  | -5.2  | -6.3  | -8.3  | -8.3  |
| C2H5 radical, staggered,<br>Cs, 2-A' | 28.9 <sup>a</sup> | 12.8  | 18.1  | 17.3  | 17.2  | 16.9  | 24.6  | 24.8  | 23.5  | 23.3  | 24.6  | 23.8  | 22.3  | 22.3  |
| (CH3)2CH radical, Cs,<br>2-A'        | 21.5 <sup>a</sup> | 1.4   | 6.6   | 5.3   | 5.8   | 5.9   | 14.7  | 14.3  | 11.8  | 11.6  | 13.4  | 11.6  | 9.0   | 9.0   |
| t-Butyl radical, (CH3)3C,<br>C3v     | 12.3 <sup>a</sup> | -6.8  | -2.7  | -5.9  | -5.0  | -4.5  | 7.7   | 3.2   | -1.0  | -1.1  | 2.4   | -0.8  | -4.2  | -4.2  |
| NO2 radical, C2v, 2-A1               | 7.9 <sup>a</sup>  | -4.5  | -15.0 | -1.0  | -8.1  | -4.1  | -6.5  | 5.1   | 4.9   | 4.7   | -1.5  | -1.5  | -2.2  | -2.2  |

<sup>a</sup> L.A.Curtiss, K.Raghavachari, P.C.Redfern, and J.A.Pople, J.Chem.Phys. 106, 1063 (1997).

Table S17: Benchmark Results for G3 Subset of G2G3-CHNOF Data Set. Heats of Formation (kcal/mol)

| Molecule                                              | Ref.                | MNDO   | AM1    | PM3    | PM6    | PM7    | OM1    | OM2    |        | OM3    |        | D3T    | OM3    | D3     | D3T    |
|-------------------------------------------------------|---------------------|--------|--------|--------|--------|--------|--------|--------|--------|--------|--------|--------|--------|--------|--------|
|                                                       |                     |        |        |        |        |        |        | D2     | D3     | D2     | D3     |        |        |        |        |
| Methylallene                                          | 38.8 <sup>a</sup>   | 33.5   | 37.1   | 38.0   | 30.1   | 29.0   | 38.4   | 38.1   | 35.8   | 37.6   | 36.1   | 35.2   | 37.6   | 33.0   | 33.0   |
| C5H8 (Isoprene)                                       | 18.0 <sup>a</sup>   | 21.9   | 23.3   | 22.7   | 19.4   | 18.0   | 24.5   | 21.4   | 16.9   | 22.6   | 19.3   | 16.6   | 22.6   | 15.2   | 15.2   |
| Cyclopentane twist C                                  | -18.3 <sup>a</sup>  | -30.5  | -28.8  | -23.9  | -20.1  | -20.0  | -24.8  | -19.7  | -25.8  | -20.8  | -25.2  | -25.5  | -20.8  | -29.8  | -29.8  |
| n-Pentane                                             | -35.1 <sup>a</sup>  | -34.4  | -38.0  | -34.5  | -31.0  | -33.3  | -35.5  | -34.7  | -41.1  | -35.2  | -40.3  | -40.8  | -35.2  | -44.6  | -44.6  |
| Neopentane                                            | -40.2 <sup>a</sup>  | -24.6  | -32.8  | -35.8  | -35.0  | -35.5  | -29.3  | -39.6  | -47.2  | -37.6  | -44.1  | -46.4  | -37.6  | -48.1  | -48.1  |
| 1,3-Cyclohexadiene                                    | 25.4 <sup>a</sup>   | 14.5   | 17.5   | 20.4   | 19.3   | 20.2   | 22.3   | 25.9   | 20.4   | 24.8   | 21.4   | 20.0   | 24.8   | 15.6   | 15.6   |
| 1,4-Cyclohexadiene                                    | 25.0 <sup>a</sup>   | 14.4   | 17.0   | 19.4   | 18.7   | 20.0   | 22.7   | 26.8   | 21.4   | 24.8   | 21.7   | 21.0   | 24.8   | 15.8   | 15.8   |
| Cyclohexane chair                                     | -29.5 <sup>a</sup>  | -34.8  | -38.5  | -31.0  | -27.5  | -27.4  | -31.2  | -27.1  | -35.9  | -28.5  | -35.1  | -35.0  | -28.5  | -40.6  | -40.5  |
| n-Hexane                                              | -39.9 <sup>a</sup>  | -39.1  | -44.8  | -39.9  | -36.0  | -38.4  | -40.7  | -39.2  | -47.3  | -40.0  | -46.5  | -46.9  | -40.0  | -51.6  | -51.6  |
| 3-Methylpentane                                       | -41.1 <sup>a</sup>  | -33.0  | -41.3  | -39.0  | -35.7  | -37.8  | -36.7  | -39.9  | -48.2  | -39.5  | -47.2  | -48.2  | -39.5  | -52.1  | -52.0  |
| Toluene stag                                          | 12.0 <sup>a</sup>   | 13.6   | 14.4   | 14.1   | 14.2   | 13.2   | 12.2   | 9.5    | 3.6    | 9.6    | 6.1    | 2.9    | 9.6    | -0.6   | -0.6   |
| n-Heptane                                             | -44.9 <sup>a</sup>  | -43.8  | -51.7  | -45.3  | -41.0  | -43.5  | -45.8  | -43.8  | -53.6  | -44.8  | -52.8  | -53.0  | -44.8  | -58.7  | -58.7  |
| Cyclooctatetraene                                     | 70.7 <sup>a</sup>   | 56.2   | 63.5   | 66.7   | 58.4   | 59.6   | 72.0   | 75.2   | 67.9   | 73.9   | 69.3   | 67.2   | 73.9   | 61.6   | 61.6   |
| n-Octane                                              | -49.9 <sup>a</sup>  | -48.5  | -58.5  | -50.7  | -46.0  | -48.6  | -51.0  | -48.3  | -59.8  | -49.7  | -59.0  | -59.0  | -49.7  | -65.8  | -65.8  |
| Naphthalene                                           | 35.9 <sup>a</sup>   | 38.3   | 40.6   | 40.7   | 40.1   | 39.7   | 40.2   | 34.8   | 26.4   | 35.7   | 31.0   | 25.3   | 35.7   | 21.0   | 21.0   |
| Azulene                                               | 69.1 <sup>a</sup>   | 72.1   | 84.4   | 81.3   | 76.2   | 79.1   | 86.9   | 83.4   | 75.1   | 82.5   | 77.3   | 74.0   | 82.5   | 68.1   | 68.1   |
| Z-Methylacetate                                       | -98.4 <sup>a</sup>  | -93.7  | -96.4  | -94.1  | -97.3  | -96.7  | -93.1  | -95.6  | -98.6  | -93.8  | -96.0  | -98.8  | -93.8  | -99.0  | -99.0  |
| tert-Butanol                                          | -74.7 <sup>a</sup>  | -64.3  | -71.6  | -71.3  | -75.1  | -74.8  | -68.2  | -76.8  | -82.9  | -75.9  | -80.9  | -82.4  | -75.9  | -84.5  | -84.5  |
| Anilin                                                | 20.8 <sup>a</sup>   | 21.7   | 20.5   | 21.3   | 21.4   | 21.2   | 25.6   | 25.2   | 19.9   | 22.3   | 19.2   | 19.0   | 22.3   | 12.7   | 12.7   |
| Phenol (planar)                                       | -23.0 <sup>a</sup>  | -26.7  | -22.2  | -21.7  | -21.2  | -22.2  | -23.1  | -21.7  | -26.5  | -23.6  | -26.2  | -27.2  | -23.6  | -32.3  | -32.3  |
| Divinylether                                          | -3.3 <sup>a</sup>   | -3.5   | 2.1    | 0.8    | -5.2   | -5.7   | -0.8   | 4.5    | 1.8    | 4.6    | 2.7    | 1.2    | 4.6    | -0.6   | -0.6   |
| Tetrahydrofuran                                       | -44.0 <sup>a</sup>  | -59.3  | -58.4  | -51.3  | -51.3  | -48.9  | -50.1  | -47.9  | -52.6  | -46.3  | -49.5  | -52.5  | -46.3  | -53.5  | -53.5  |
| Cyclopentanone                                        | -45.9 <sup>a</sup>  | -57.0  | -55.3  | -55.2  | -53.9  | -53.6  | -55.1  | -55.0  | -60.6  | -57.5  | -61.3  | -60.6  | -57.5  | -66.1  | -66.1  |
| Benzoquinone                                          | -29.4 <sup>a</sup>  | -32.9  | -25.1  | -31.5  | -27.7  | -28.4  | -26.1  | -32.5  | -37.2  | -32.9  | -35.3  | -37.9  | -32.9  | -41.3  | -41.3  |
| Pyrimidine                                            | 46.8 <sup>a</sup>   | 35.0   | 43.9   | 38.0   | 45.1   | 40.2   | 47.3   | 44.5   | 41.4   | 41.9   | 40.4   | 40.4   | 41.9   | 35.4   | 35.4   |
| N=C-CH2-CH2-C≡N                                       | 50.1 <sup>a</sup>   | 48.9   | 45.3   | 57.3   | 50.9   | 48.7   | 43.8   | 47.7   | 44.5   | 43.4   | 41.2   | 44.0   | 43.4   | 37.7   | 37.7   |
| 1,2-Dicyanoetha                                       | 46.9 <sup>a</sup>   | 37.8   | 44.2   | 39.3   | 47.6   | 44.3   | 51.7   | 44.9   | 41.9   | 42.0   | 40.4   | 40.9   | 42.0   | 35.5   | 35.5   |
| Pyrazin                                               | 15.6 <sup>a</sup>   | 12.4   | 16.3   | 8.9    | 16.0   | 16.5   | 15.0   | 11.2   | 8.9    | 9.8    | 8.5    | 8.5    | 9.8    | 5.5    | 5.5    |
| CH3-C(=O)-C≡CH<br>(Acetylacetylene)                   | -24.0 <sup>a</sup>  | -28.0  | -27.0  | -28.9  | -23.1  | -25.7  | -28.8  | -27.9  | -31.0  | -29.5  | -31.6  | -31.5  | -29.5  | -35.1  | -35.1  |
| CH3-CH=CH-CHO<br>(Crotonaldehyd)                      | -136.8 <sup>a</sup> | -132.6 | -131.7 | -135.0 | -138.8 | -140.3 | -136.7 | -139.5 | -143.4 | -138.8 | -141.4 | -143.9 | -138.8 | -145.7 | -145.7 |
| Acetic anhydride<br>(CH3)2CH-CN<br>(Isobutanenitrile) | 5.6 <sup>a</sup>    | 11.3   | 8.5    | 13.4   | 10.0   | 8.0    | 6.9    | 5.1    | 0.9    | 3.5    | 0.4    | 0.8    | 3.5    | -3.1   | -3.1   |
| Methylketone                                          | -57.1 <sup>a</sup>  | -54.0  | -55.2  | -57.4  | -57.5  | -59.4  | -57.9  | -61.8  | -66.1  | -63.4  | -66.6  | -66.2  | -63.4  | -70.3  | -70.3  |
| 2-Methylpropionaldehyde                               | -51.6 <sup>a</sup>  | -50.5  | -53.1  | -54.8  | -47.6  | -51.1  | -54.8  | -56.0  | -60.8  | -57.1  | -60.8  | -60.7  | -57.1  | -64.3  | -64.3  |
| 1,4-Dioxane                                           | -75.5 <sup>a</sup>  | -89.2  | -95.0  | -83.1  | -85.6  | -82.1  | -75.1  | -76.5  | -82.1  | -72.4  | -76.4  | -81.8  | -72.4  | -80.5  | -80.5  |
| Tetrahydropyrrole                                     | -0.8 <sup>a</sup>   | -15.8  | -10.4  | -12.0  | -7.9   | -5.6   | -5.1   | 0.8    | -4.4   | 1.5    | -2.3   | -4.4   | 1.5    | -6.6   | -6.6   |
| Nitro-s-butane                                        | -39.1 <sup>a</sup>  | -10.1  | -28.2  | -31.9  | -33.9  | -34.3  | -25.9  | -36.2  | -43.0  | -34.8  | -40.4  | -42.9  | -34.8  | -44.9  | -44.9  |
| Diethylether                                          | -60.3 <sup>a</sup>  | -62.0  | -64.4  | -57.4  | -58.5  | -58.9  | -61.4  | -61.1  | -65.9  | -58.4  | -62.2  | -65.9  | -58.4  | -65.7  | -65.7  |
| CH3-CH(OCH3)2 (Acetal)                                | -93.1 <sup>a</sup>  | -96.1  | -106.1 | -94.9  | -100.6 | -96.9  | -90.7  | -96.4  | -102.5 | -88.7  | -93.7  | -102.2 | -88.7  | -97.5  | -97.5  |
| t-Butylamine                                          | -28.9 <sup>a</sup>  | -15.5  | -21.3  | -25.2  | -26.1  | -24.2  | -14.7  | -22.3  | -29.1  | -24.6  | -30.4  | -28.7  | -24.6  | -34.3  | -34.3  |

... continued on next page ...

Table S17: ... continued from previous page ...

| Molecule                         | Ref.                | MNDO   | AMI    | PM3    | PM6    | PM7    | OM1    |        | OM2    |        | OM3    |        | OM3    |        | D3T |
|----------------------------------|---------------------|--------|--------|--------|--------|--------|--------|--------|--------|--------|--------|--------|--------|--------|-----|
|                                  |                     |        |        |        |        |        | D2     | D3     | D2     | D3     | D2     | D3     | D2     | D3     |     |
| N-Methylpyrrole                  | 24.6 <sup>a</sup>   | 32.3   | 44.4   | 25.9   | 25.0   | 25.7   | 35.5   | 31.1   | 26.8   | 26.0   | 33.5   | 30.6   | 25.6   | 25.6   |     |
| Tetrahydropyran                  | -53.4 <sup>a</sup>  | -62.0  | -67.1  | -57.4  | -58.4  | -56.0  | -54.6  | -53.1  | -60.2  | -59.7  | -51.7  | -57.0  | -61.8  | -61.8  |     |
| Diethylketone                    | -61.6 <sup>a</sup>  | -58.6  | -61.1  | -61.5  | -60.3  | -63.3  | -63.3  | -66.0  | -72.0  | -72.0  | -67.5  | -72.0  | -76.7  | -76.7  |     |
| Isopropylacetate                 | -115.1 <sup>a</sup> | -100.5 | -106.3 | -104.3 | -113.9 | -113.2 | -108.1 | -113.7 | -120.2 | -120.2 | -111.3 | -116.3 | -121.2 | -121.1 |     |
| Perhydropyridine<br>(Piperidine) | -11.3 <sup>a</sup>  | -18.5  | -21.8  | -18.8  | -16.1  | -13.8  | -9.8   | -6.7   | -14.6  | -14.1  | -7.2   | -13.3  | -18.5  | -18.5  |     |
| t-Butylmethylether               | -67.8 <sup>a</sup>  | -54.6  | -64.8  | -64.2  | -69.8  | -68.2  | -59.1  | -70.5  | -78.5  | -77.9  | -66.1  | -73.0  | -77.2  | -77.2  |     |
| 1,3-Difluorobenzene              | -73.9 <sup>a</sup>  | -70.9  | -67.9  | -63.3  | -72.5  | -71.5  | -74.2  | -72.9  | -77.6  | -78.0  | -74.0  | -76.5  | -82.0  | -82.0  |     |
| 1,4-Difluorobenzene              | -73.3 <sup>a</sup>  | -71.0  | -68.0  | -63.3  | -71.3  | -70.9  | -73.9  | -72.6  | -77.2  | -77.6  | -73.5  | -76.0  | -81.5  | -81.5  |     |
| Fluorobenzene                    | -27.7 <sup>a</sup>  | -25.2  | -23.3  | -20.2  | -24.3  | -24.6  | -28.8  | -27.3  | -31.8  | -32.3  | -28.0  | -30.3  | -35.9  | -35.9  |     |
| Diisopropylether                 | -76.3 <sup>a</sup>  | -64.8  | -72.3  | -69.1  | -76.1  | -75.8  | -70.7  | -77.7  | -86.7  | -86.3  | -74.1  | -81.7  | -86.9  | -86.8  |     |
| C2F6 D                           | -321.3 <sup>a</sup> | -299.6 | -313.2 | -317.8 | -314.4 | -311.9 | -316.3 | -317.5 | -320.4 | -319.7 | -310.5 | -312.4 | -314.0 | -314.0 |     |
| CF3 C                            | -111.3 <sup>a</sup> | -137.0 | -142.8 | -132.1 | -125.9 | -123.8 | -120.4 | -123.2 | -123.7 | -123.8 | -122.6 | -122.8 | -123.6 | -123.6 |     |
| Phenyl radical C                 | 81.2 <sup>a</sup>   | 78.1   | 79.5   | 77.3   | 74.7   | 75.7   | 71.6   | 71.5   | 67.8   | 67.0   | 70.4   | 68.6   | 63.2   | 63.2   |     |

<sup>a</sup> G3 values derived from the data in: L.A.Curtiss, K.Raghavachari, P.C.Redfern, V.Rassolov, and J.A.Pople, J.Chem.Phys. 112, 7374 (2000).

Table S18: Benchmark Results for Alkanes28 Subset of G2G3-CHNOF Data Set. Heats of Formation (kcal/mol)

| Molecule           | Ref.               | MNDO  | AM1    | PM3   | PM6   | PM7   | OM1   | OM2   |        | OM3    |       | D3T    |
|--------------------|--------------------|-------|--------|-------|-------|-------|-------|-------|--------|--------|-------|--------|
|                    |                    |       |        |       |       |       |       | D2    | D3     | D2     | D3    |        |
| Heats of formation |                    |       |        |       |       |       |       |       |        |        |       |        |
| Methane            | -17.8 <sup>a</sup> | -11.9 | -8.8   | -13.0 | -12.3 | -14.4 | -13.8 | -19.3 | -19.8  | -19.9  | -18.0 | -19.1  |
| Ethane             | -20.0 <sup>a</sup> | -19.7 | -17.4  | -18.1 | -15.8 | -18.2 | -20.3 | -21.2 | -22.8  | -23.0  | -20.8 | -23.6  |
| Propane            | -25.0 <sup>a</sup> | -24.9 | -24.3  | -23.6 | -21.0 | -23.1 | -25.2 | -25.5 | -28.7  | -28.7  | -25.4 | -30.4  |
| n-Butane           | -30.0 <sup>a</sup> | -29.7 | -31.1  | -29.1 | -26.0 | -28.2 | -30.4 | -30.1 | -34.9  | -34.8  | -30.3 | -37.5  |
| n-Pentane          | -35.1 <sup>a</sup> | -34.4 | -38.0  | -34.5 | -31.0 | -33.3 | -35.5 | -34.7 | -41.1  | -40.8  | -35.2 | -44.6  |
| n-Hexane           | -39.9 <sup>a</sup> | -39.1 | -44.8  | -39.9 | -36.0 | -38.4 | -40.7 | -39.2 | -47.3  | -46.9  | -40.0 | -51.6  |
| n-Heptane          | -44.9 <sup>a</sup> | -43.8 | -51.7  | -45.3 | -40.9 | -43.4 | -45.8 | -43.8 | -53.6  | -53.0  | -44.8 | -58.7  |
| n-Octane           | -49.9 <sup>a</sup> | -48.5 | -58.5  | -50.7 | -46.0 | -48.6 | -51.0 | -48.3 | -59.8  | -59.0  | -49.7 | -65.8  |
| n-Nonane           | -54.5 <sup>a</sup> | -53.3 | -65.4  | -56.2 | -50.8 | -53.5 | -56.1 | -52.9 | -66.0  | -65.1  | -54.5 | -72.9  |
| n-Decane           | -59.6 <sup>a</sup> | -58.0 | -72.2  | -61.6 | -56.0 | -58.8 | -61.3 | -57.5 | -72.2  | -71.2  | -59.3 | -79.9  |
| n-Undecane         | -64.8 <sup>a</sup> | -62.7 | -79.1  | -67.0 | -60.7 | -63.6 | -66.4 | -62.0 | -78.4  | -77.3  | -64.2 | -87.0  |
| n-Dodecane         | -69.2 <sup>a</sup> | -67.4 | -85.9  | -72.4 | -66.1 | -69.0 | -71.6 | -66.6 | -84.6  | -83.4  | -69.0 | -94.1  |
| n-Tridecane        | -74.5 <sup>b</sup> | -72.1 | -92.8  | -77.9 | -70.7 | -73.7 | -76.7 | -71.1 | -90.8  | -89.4  | -73.8 | -101.2 |
| n-Tetradecane      | -79.4 <sup>b</sup> | -76.8 | -99.6  | -83.3 | -76.1 | -79.2 | -81.8 | -75.7 | -97.0  | -95.5  | -78.7 | -108.3 |
| n-Pentadecane      | -84.8 <sup>b</sup> | -81.5 | -106.5 | -88.7 | -80.6 | -83.8 | -87.0 | -80.3 | -103.2 | -101.6 | -83.5 | -115.3 |
| n-Hexadecane       | -89.6 <sup>a</sup> | -86.2 | -113.3 | -94.1 | -86.1 | -89.4 | -92.1 | -84.8 | -109.4 | -107.7 | -88.4 | -122.4 |
| 2-Methylpropane    | -32.1 <sup>a</sup> | -26.8 | -29.4  | -29.5 | -27.5 | -28.9 | -28.3 | -31.8 | -37.0  | -36.7  | -31.3 | -38.8  |
| 2-Methylbutane     | -36.7 <sup>a</sup> | -30.0 | -35.4  | -34.4 | -31.7 | -33.5 | -32.6 | -35.9 | -43.0  | -42.5  | -35.5 | -45.4  |
| 2-Methylpentane    | -41.8 <sup>a</sup> | -34.6 | -42.2  | -40.0 | -36.7 | -38.7 | -37.7 | -40.4 | -49.2  | -48.6  | -40.3 | -52.6  |
| 2-Methylhexane     | -46.5 <sup>a</sup> | -39.2 | -49.1  | -45.4 | -41.7 | -43.8 | -42.9 | -45.0 | -55.5  | -54.7  | -45.1 | -59.6  |
| 2-Methylheptane    | -51.5 <sup>a</sup> | -44.0 | -55.9  | -50.8 | -46.7 | -48.9 | -48.0 | -49.5 | -61.7  | -60.8  | -50.0 | -66.7  |
| 2-Methylnonane     | -62.1 <sup>a</sup> | -53.4 | -69.6  | -61.7 | -56.7 | -59.1 | -58.3 | -58.7 | -74.1  | -72.9  | -59.6 | -80.9  |
| Relative energies  |                    |       |        |       |       |       |       |       |        |        |       |        |
| 2-Methylpropane    | -2.1 <sup>a</sup>  | 2.9   | 1.8    | -0.5  | -1.5  | -0.7  | 2.0   | -1.7  | -2.0   | -1.9   | -1.0  | -1.3   |
| 2-Methylbutane     | -1.6 <sup>a</sup>  | 4.4   | 2.6    | 0.1   | -0.7  | -0.2  | 2.9   | -1.2  | -1.9   | -1.6   | -0.3  | -0.9   |
| 2-Methylpentane    | -1.8 <sup>a</sup>  | 4.6   | 2.6    | -0.1  | -0.7  | -0.3  | 3.0   | -1.2  | -1.9   | -1.7   | -0.3  | -0.9   |
| 2-Methylhexane     | -1.6 <sup>a</sup>  | 4.6   | 2.6    | -0.1  | -0.8  | -0.4  | 3.0   | -1.2  | -1.9   | -1.7   | -0.3  | -0.9   |
| 2-Methylheptane    | -1.6 <sup>a</sup>  | 4.6   | 2.6    | -0.1  | -0.7  | -0.3  | 3.0   | -1.2  | -1.9   | -1.7   | -0.3  | -0.9   |
| 2-Methylnonane     | -2.5 <sup>a</sup>  | 4.6   | 2.6    | -0.1  | -0.7  | -0.3  | 3.0   | -1.2  | -1.9   | -1.7   | -0.3  | -0.9   |

a J.B.Pedley, R.D.Naylor, and S.P.Kirby, "Thermochemical Data of Organic Compounds", 2nd ed., Chapman and Hall, London, 1986. b P.C.Redfern, P.Zapol, L.A.Curtiss, and K.Raghavachari, J.Phys.Chem. A 104, 5850 (2000).

Table S19: Benchmark Results for the W4-11-CHNOF Data Set. Atomization and Reaction Energies (kcal/mol). In the Column "Species" Is Given Only One of the Species, Energy of Which Was Used to Derive Final Energy. The Same Species May Be Involved in Different Relative or Reaction Energies, Thus Check Reference Value to Attribute Each of Entries to Specific Reaction in the W4-11 Set

| Species                      | Ref.                | MNDO   | AM1    | PM3    | PM6   | PM7   | OM1    | OM2    |        |        | OM3    |        |        | D3T    |        |
|------------------------------|---------------------|--------|--------|--------|-------|-------|--------|--------|--------|--------|--------|--------|--------|--------|--------|
|                              |                     |        |        |        |       |       |        | D2     | D3     | D3T    | D2     | D3     | D3T    |        |        |
| TAE140 (ZPVE-exclusive, 0 K) |                     |        |        |        |       |       |        |        |        |        |        |        |        |        |        |
| h2                           | 109.5 <sup>a</sup>  | 106.5  | 113.1  | 122.4  | 136.4 | 143.1 | 106.7  | 110.9  | 110.9  | 110.9  | 111.0  | 111.0  | 108.9  | 109.0  | 109.0  |
| ch2-trip                     | 190.7 <sup>a</sup>  | 205.4  | 201.7  | 207.1  | 201.2 | 197.3 | 193.5  | 191.5  | 191.7  | 191.7  | 191.8  | 191.8  | 193.6  | 194.0  | 194.0  |
| ch3                          | 307.9 <sup>a</sup>  | 318.0  | 311.3  | 312.4  | 311.7 | 311.8 | 306.5  | 308.3  | 308.6  | 308.7  | 308.7  | 308.7  | 306.5  | 307.3  | 307.3  |
| ch4                          | 420.4 <sup>a</sup>  | 415.0  | 409.9  | 415.8  | 411.3 | 413.5 | 417.9  | 421.7  | 422.2  | 422.4  | 422.4  | 422.4  | 420.2  | 421.3  | 421.3  |
| c2h6                         | 713.1 <sup>a</sup>  | 712.9  | 707.3  | 709.7  | 703.3 | 706.1 | 714.2  | 712.4  | 714.1  | 714.2  | 714.2  | 714.2  | 711.5  | 714.4  | 714.4  |
| propane                      | 1007.9 <sup>a</sup> | 1007.6 | 1003.1 | 1004.1 | 996.3 | 999.1 | 1009.4 | 1005.6 | 1008.8 | 1008.8 | 1008.8 | 1008.8 | 1004.8 | 1009.8 | 1009.8 |
| ch2-sing                     | 181.5 <sup>a</sup>  | 175.8  | 171.9  | 170.4  | 175.2 | 178.2 | 182.1  | 178.5  | 178.6  | 178.8  | 178.8  | 178.8  | 181.0  | 181.5  | 181.5  |
| ch                           | 84.2 <sup>a</sup>   | 82.9   | 81.3   | 79.3   | 83.9  | 86.1  | 89.2   | 86.0   | 86.1   | 86.2   | 86.2   | 86.2   | 88.0   | 88.2   | 88.2   |
| c2h5f                        | 721.5 <sup>a</sup>  | 719.0  | 719.3  | 713.5  | 712.3 | 709.8 | 722.0  | 721.2  | 723.0  | 723.0  | 723.0  | 723.0  | 718.4  | 719.6  | 721.4  |
| ch3nh2                       | 582.3 <sup>a</sup>  | 585.5  | 582.2  | 581.0  | 574.6 | 575.9 | 582.7  | 578.6  | 579.8  | 580.0  | 580.0  | 580.0  | 578.4  | 579.1  | 580.7  |
| ch3f                         | 423.0 <sup>a</sup>  | 426.3  | 425.5  | 418.3  | 416.3 | 412.4 | 421.2  | 425.3  | 425.9  | 426.0  | 426.0  | 426.0  | 421.5  | 421.8  | 422.6  |
| propene                      | 861.6 <sup>a</sup>  | 861.3  | 857.1  | 857.5  | 854.5 | 856.4 | 862.7  | 859.7  | 861.8  | 862.2  | 862.2  | 862.2  | 859.0  | 862.8  | 862.8  |
| nh3                          | 298.0 <sup>a</sup>  | 294.4  | 293.2  | 289.7  | 286.7 | 286.8 | 291.5  | 290.4  | 290.7  | 290.9  | 290.9  | 290.9  | 294.9  | 295.6  | 295.6  |
| ethanol                      | 811.2 <sup>a</sup>  | 817.2  | 815.1  | 809.5  | 802.0 | 804.0 | 814.8  | 807.0  | 809.1  | 809.2  | 809.2  | 809.2  | 806.7  | 808.2  | 810.3  |
| ch3nh                        | 474.6 <sup>a</sup>  | 485.1  | 480.7  | 487.5  | 475.1 | 477.3 | 479.4  | 473.9  | 474.7  | 475.0  | 475.0  | 475.0  | 475.5  | 476.1  | 477.4  |
| c2h4                         | 564.1 <sup>a</sup>  | 561.4  | 558.7  | 558.1  | 556.8 | 559.0 | 565.4  | 562.8  | 563.6  | 563.9  | 563.9  | 563.9  | 561.3  | 561.8  | 563.3  |
| methanol                     | 513.5 <sup>a</sup>  | 522.4  | 520.6  | 515.6  | 508.0 | 509.2 | 516.1  | 511.0  | 511.8  | 512.0  | 512.0  | 512.0  | 510.9  | 511.5  | 512.6  |
| nh2                          | 182.6 <sup>a</sup>  | 190.4  | 188.0  | 190.1  | 180.4 | 181.7 | 185.6  | 178.7  | 178.8  | 178.9  | 178.9  | 178.9  | 186.1  | 186.2  | 186.6  |
| nh                           | 83.1 <sup>a</sup>   | 92.1   | 90.3   | 93.7   | 84.7  | 86.0  | 88.9   | 83.4   | 83.4   | 83.5   | 83.5   | 83.5   | 88.8   | 88.9   | 88.9   |
| ch2nh2                       | 482.3 <sup>a</sup>  | 498.0  | 499.5  | 494.8  | 494.8 | 494.3 | 488.1  | 485.9  | 486.7  | 487.1  | 487.1  | 487.1  | 488.9  | 489.4  | 490.8  |
| h2o                          | 233.0 <sup>a</sup>  | 236.7  | 233.7  | 228.6  | 225.1 | 229.6 | 232.0  | 229.4  | 229.5  | 229.6  | 229.6  | 229.6  | 230.4  | 230.7  | 230.7  |
| hf                           | 141.6 <sup>a</sup>  | 134.9  | 145.5  | 138.7  | 137.7 | 137.5 | 143.9  | 137.1  | 137.2  | 137.2  | 137.2  | 137.2  | 139.9  | 139.9  | 140.0  |
| ch2ch                        | 446.1 <sup>a</sup>  | 448.5  | 447.5  | 450.0  | 450.8 | 450.3 | 451.1  | 448.6  | 449.2  | 449.5  | 449.5  | 449.5  | 449.8  | 450.1  | 451.3  |
| oh                           | 107.2 <sup>a</sup>  | 115.4  | 114.8  | 112.8  | 100.2 | 107.1 | 112.2  | 109.9  | 109.9  | 110.0  | 110.0  | 110.0  | 110.7  | 110.8  | 110.8  |
| propyne                      | 705.6 <sup>a</sup>  | 708.5  | 703.8  | 707.7  | 699.9 | 699.5 | 704.9  | 703.1  | 704.3  | 704.7  | 704.7  | 704.7  | 703.2  | 705.8  | 705.8  |
| acetaldehyde                 | 677.9 <sup>a</sup>  | 680.6  | 677.7  | 681.0  | 672.0 | 675.2 | 684.1  | 680.5  | 681.9  | 682.1  | 682.1  | 682.1  | 682.5  | 685.1  | 685.1  |
| allene                       | 704.1 <sup>a</sup>  | 706.0  | 701.9  | 700.3  | 707.6 | 708.7 | 704.8  | 702.8  | 704.0  | 704.5  | 704.5  | 704.5  | 702.9  | 705.5  | 705.5  |
| c2h3f                        | 573.9 <sup>a</sup>  | 573.3  | 571.8  | 566.2  | 568.7 | 568.1 | 572.4  | 570.1  | 571.1  | 571.3  | 571.3  | 571.3  | 569.7  | 570.3  | 571.7  |
| oxirane                      | 651.5 <sup>a</sup>  | 652.8  | 646.1  | 643.8  | 642.8 | 645.8 | 654.8  | 650.4  | 651.8  | 651.9  | 651.9  | 651.9  | 645.5  | 646.3  | 648.0  |
| ch2f2                        | 437.7 <sup>a</sup>  | 440.0  | 441.7  | 430.4  | 429.4 | 423.0 | 430.7  | 436.0  | 436.7  | 436.8  | 436.8  | 436.8  | 431.8  | 432.2  | 433.1  |
| ch2c                         | 359.9 <sup>a</sup>  | 336.9  | 344.7  | 349.1  | 360.6 | 363.1 | 373.1  | 372.5  | 372.8  | 373.2  | 373.2  | 373.2  | 372.1  | 372.2  | 373.3  |
| n2h4                         | 438.3 <sup>a</sup>  | 445.4  | 443.7  | 437.6  | 438.7 | 439.1 | 445.4  | 434.7  | 435.5  | 435.9  | 435.9  | 435.9  | 436.2  | 436.7  | 438.0  |
| ch2nh                        | 439.4 <sup>a</sup>  | 440.8  | 440.3  | 437.1  | 428.8 | 432.8 | 442.6  | 438.0  | 438.5  | 438.9  | 438.9  | 438.9  | 440.8  | 441.1  | 442.3  |
| acetic                       | 804.0 <sup>a</sup>  | 797.9  | 798.7  | 799.4  | 793.1 | 795.2 | 802.1  | 797.3  | 799.1  | 799.4  | 799.4  | 799.4  | 797.1  | 798.8  | 800.5  |
| c2h2                         | 405.5 <sup>a</sup>  | 402.9  | 405.2  | 408.8  | 401.3 | 401.1 | 407.3  | 404.7  | 405.1  | 405.3  | 405.3  | 405.3  | 404.5  | 405.4  | 405.4  |
| h2co                         | 374.7 <sup>a</sup>  | 381.6  | 379.1  | 381.5  | 367.1 | 372.0 | 382.8  | 377.5  | 377.8  | 378.0  | 378.0  | 378.0  | 378.7  | 379.6  | 379.6  |
| h2cn                         | 343.7 <sup>a</sup>  | 341.9  | 343.4  | 347.9  | 335.3 | 340.7 | 346.2  | 345.8  | 346.2  | 346.5  | 346.5  | 346.5  | 346.6  | 346.8  | 347.7  |
| t-hcoH                       | 322.5 <sup>a</sup>  | 332.7  | 330.1  | 330.5  | 327.5 | 328.2 | 339.9  | 335.8  | 336.1  | 336.4  | 336.4  | 336.4  | 334.7  | 334.8  | 335.6  |

... continued on next page ...

Table S19: . . . continued from previous page . . .

| Species   | Ref.               | MNDO  | AMI   | PM3   | PM6   | PM7   | OMI   |       | OM2   |       | OM3   |       | D3T   |       |
|-----------|--------------------|-------|-------|-------|-------|-------|-------|-------|-------|-------|-------|-------|-------|-------|
|           |                    |       |       |       |       |       | D2    | D3    | D2    | D3    | D2    | D3    |       |       |
| c-hcoH    | 317.6 <sup>a</sup> | 332.0 | 328.8 | 327.2 | 326.5 | 326.0 | 335.4 | 334.3 | 334.7 | 334.9 | 328.2 | 328.4 | 329.1 | 329.1 |
| ketene    | 533.5 <sup>a</sup> | 528.0 | 525.3 | 529.5 | 537.1 | 537.5 | 531.9 | 524.5 | 525.1 | 525.4 | 529.9 | 530.2 | 531.5 | 531.5 |
| formic    | 501.9 <sup>a</sup> | 500.5 | 504.8 | 502.3 | 492.8 | 495.4 | 501.6 | 492.9 | 493.5 | 493.8 | 492.8 | 493.1 | 494.3 | 494.3 |
| hcnH      | 336.2 <sup>a</sup> | 337.4 | 345.7 | 343.3 | 343.0 | 343.9 | 344.2 | 338.7 | 339.0 | 339.3 | 346.8 | 346.9 | 347.9 | 347.9 |
| glyoxal   | 635.1 <sup>a</sup> | 644.9 | 641.3 | 646.6 | 626.6 | 633.5 | 645.8 | 640.7 | 641.8 | 642.1 | 642.6 | 643.2 | 645.0 | 645.0 |
| hcoF      | 403.7 <sup>a</sup> | 397.7 | 400.1 | 397.2 | 393.0 | 393.7 | 396.9 | 393.6 | 394.0 | 394.2 | 395.7 | 395.9 | 396.7 | 396.7 |
| cf4       | 478.8 <sup>a</sup> | 465.0 | 473.5 | 477.7 | 471.9 | 469.5 | 467.6 | 470.3 | 471.2 | 471.2 | 468.1 | 468.4 | 469.6 | 469.6 |
| hccf      | 398.5 <sup>a</sup> | 408.1 | 407.5 | 404.4 | 400.3 | 398.6 | 396.2 | 394.3 | 394.8 | 395.0 | 397.6 | 397.8 | 398.7 | 398.7 |
| hcn       | 313.4 <sup>a</sup> | 309.7 | 313.6 | 311.2 | 310.4 | 313.8 | 320.7 | 318.3 | 318.5 | 318.7 | 318.7 | 316.3 | 316.9 | 316.9 |
| hnc       | 298.2 <sup>a</sup> | 275.8 | 295.2 | 286.9 | 296.2 | 304.0 | 310.6 | 300.1 | 300.3 | 300.5 | 314.0 | 314.1 | 314.7 | 314.7 |
| ceH       | 266.2 <sup>a</sup> | 236.3 | 236.2 | 240.0 | 267.0 | 264.3 | 253.8 | 261.0 | 261.2 | 261.4 | 275.2 | 275.3 | 275.9 | 275.9 |
| hco       | 279.4 <sup>a</sup> | 285.7 | 286.7 | 296.4 | 287.4 | 286.7 | 294.4 | 287.5 | 287.7 | 287.9 | 291.2 | 291.3 | 291.8 | 291.8 |
| co        | 259.7 <sup>a</sup> | 237.1 | 236.0 | 252.6 | 246.1 | 250.7 | 263.0 | 250.6 | 250.7 | 250.8 | 250.8 | 250.8 | 251.1 | 251.1 |
| oxirene   | 456.1 <sup>a</sup> | 461.8 | 453.9 | 466.3 | 465.0 | 467.8 | 460.4 | 454.0 | 454.7 | 454.9 | 454.4 | 454.8 | 455.9 | 455.9 |
| f2co      | 420.6 <sup>a</sup> | 409.7 | 416.3 | 414.3 | 413.1 | 412.6 | 409.6 | 406.6 | 407.1 | 407.3 | 409.4 | 409.5 | 410.5 | 410.5 |
| hocn      | 410.1 <sup>a</sup> | 414.5 | 408.4 | 405.5 | 403.0 | 405.8 | 411.0 | 402.7 | 403.1 | 403.4 | 402.8 | 403.0 | 403.9 | 403.9 |
| hooh      | 269.1 <sup>a</sup> | 258.2 | 261.5 | 275.8 | 255.5 | 262.7 | 270.8 | 266.5 | 266.8 | 267.0 | 266.4 | 266.6 | 267.2 | 267.2 |
| t-n2h2    | 296.5 <sup>a</sup> | 311.5 | 310.2 | 303.4 | 291.1 | 296.2 | 310.5 | 300.0 | 300.3 | 300.7 | 312.1 | 312.2 | 313.1 | 313.1 |
| hncO      | 434.7 <sup>a</sup> | 415.0 | 417.9 | 418.6 | 423.1 | 425.3 | 424.3 | 409.4 | 409.7 | 410.1 | 417.1 | 417.2 | 418.2 | 418.2 |
| c-n2h2    | 291.1 <sup>a</sup> | 308.3 | 307.0 | 297.7 | 285.5 | 290.9 | 308.9 | 303.1 | 303.4 | 303.7 | 309.6 | 309.8 | 310.6 | 310.6 |
| cf2       | 258.8 <sup>a</sup> | 276.7 | 279.2 | 261.0 | 274.2 | 281.1 | 265.0 | 267.1 | 267.3 | 267.4 | 266.4 | 266.5 | 267.0 | 267.0 |
| co2       | 390.1 <sup>a</sup> | 368.6 | 372.8 | 379.0 | 379.4 | 379.1 | 385.0 | 371.5 | 371.7 | 371.9 | 377.9 | 378.0 | 378.6 | 378.6 |
| fecf      | 386.1 <sup>a</sup> | 407.3 | 405.2 | 397.4 | 394.4 | 391.4 | 379.9 | 378.5 | 379.0 | 379.2 | 385.1 | 385.3 | 386.2 | 386.2 |
| dioxirane | 410.0 <sup>a</sup> | 388.2 | 380.8 | 407.0 | 385.2 | 399.5 | 403.8 | 414.3 | 415.0 | 415.2 | 399.1 | 399.4 | 400.5 | 400.5 |
| cf        | 132.7 <sup>a</sup> | 152.7 | 152.9 | 137.0 | 142.2 | 146.2 | 137.7 | 138.6 | 138.7 | 138.7 | 138.4 | 138.4 | 138.6 | 138.6 |
| ncen      | 502.0 <sup>a</sup> | 509.7 | 508.4 | 498.3 | 501.3 | 503.6 | 504.2 | 501.2 | 501.7 | 502.1 | 501.3 | 501.5 | 502.9 | 502.9 |
| n2        | 228.5 <sup>a</sup> | 220.7 | 217.8 | 211.3 | 187.5 | 195.0 | 233.5 | 226.1 | 226.1 | 226.3 | 216.2 | 216.2 | 216.5 | 216.5 |
| n2h       | 224.9 <sup>a</sup> | 237.0 | 238.9 | 235.0 | 220.0 | 225.0 | 240.3 | 236.7 | 236.9 | 237.1 | 239.3 | 239.3 | 240.0 | 240.0 |
| hoo       | 175.5 <sup>a</sup> | 174.2 | 171.3 | 178.4 | 165.6 | 170.3 | 179.2 | 179.9 | 180.0 | 180.2 | 177.0 | 177.0 | 177.4 | 177.4 |
| hcno      | 365.0 <sup>a</sup> | 355.0 | 365.2 | 375.7 | 381.2 | 380.3 | 363.9 | 359.6 | 360.0 | 360.3 | 361.6 | 361.8 | 362.8 | 362.8 |
| honc      | 350.1 <sup>a</sup> | 341.8 | 348.0 | 341.5 | 350.6 | 357.4 | 374.9 | 350.3 | 350.7 | 351.1 | 358.5 | 358.7 | 359.7 | 359.7 |
| hno       | 205.9 <sup>a</sup> | 224.9 | 225.2 | 214.8 | 200.5 | 209.6 | 223.6 | 211.0 | 211.1 | 211.3 | 220.8 | 220.9 | 221.4 | 221.4 |
| hof       | 158.7 <sup>a</sup> | 139.1 | 157.4 | 166.3 | 152.8 | 152.8 | 152.2 | 154.6 | 154.7 | 154.8 | 152.6 | 152.6 | 153.0 | 153.0 |
| c-hono    | 312.2 <sup>a</sup> | 324.9 | 329.5 | 306.2 | 309.5 | 315.6 | 323.3 | 314.0 | 314.3 | 314.6 | 318.6 | 318.7 | 319.7 | 319.7 |
| t-hono    | 312.6 <sup>a</sup> | 328.3 | 327.8 | 308.4 | 309.2 | 315.1 | 323.4 | 309.2 | 309.5 | 309.8 | 315.6 | 315.7 | 316.6 | 316.6 |
| hmnn      | 331.8 <sup>a</sup> | 328.1 | 325.4 | 325.0 | 323.4 | 325.1 | 329.5 | 326.6 | 327.0 | 327.4 | 310.5 | 310.7 | 311.8 | 311.8 |
| cn        | 181.3 <sup>a</sup> | 156.5 | 171.1 | 157.9 | 181.8 | 180.9 | 173.4 | 174.7 | 174.8 | 175.0 | 182.1 | 182.1 | 182.5 | 182.5 |
| no        | 152.7 <sup>a</sup> | 173.7 | 171.4 | 159.2 | 146.2 | 151.5 | 168.4 | 149.9 | 149.9 | 150.0 | 158.4 | 158.4 | 158.7 | 158.7 |
| n2o       | 270.8 <sup>a</sup> | 259.9 | 262.4 | 265.1 | 262.5 | 262.6 | 270.2 | 264.3 | 264.5 | 264.8 | 253.0 | 253.0 | 253.8 | 253.8 |
| c-hooo    | 233.1 <sup>a</sup> | 207.1 | 216.2 | 232.4 | 228.0 | 232.8 | 228.2 | 235.9 | 236.3 | 236.4 | 228.6 | 228.7 | 229.5 | 229.5 |
| o2        | 120.8 <sup>a</sup> | 127.6 | 129.4 | 123.3 | 129.8 | 124.6 | 127.0 | 117.6 | 117.6 | 117.7 | 123.5 | 123.5 | 123.7 | 123.7 |
| f2        | 39.0 <sup>a</sup>  | 14.7  | 61.2  | 58.1  | 37.8  | 54.7  | 25.0  | 36.5  | 36.5  | 36.6  | 34.3  | 34.3  | 34.4  | 34.4  |
| t-hooo    | 233.3 <sup>a</sup> | 207.8 | 218.6 | 236.2 | 228.6 | 231.4 | 228.3 | 230.2 | 230.6 | 230.7 | 227.8 | 227.9 | 228.6 | 228.6 |
| no2       | 227.9 <sup>a</sup> | 239.8 | 247.8 | 236.6 | 241.9 | 238.9 | 242.6 | 228.7 | 228.9 | 229.2 | 233.2 | 233.2 | 233.9 | 233.9 |
| of        | 53.1 <sup>a</sup>  | 43.0  | 51.0  | 57.0  | 39.6  | 45.3  | 43.9  | 49.3  | 49.4  | 49.4  | 48.1  | 48.1  | 48.3  | 48.3  |

. . . continued on next page . . .

Table S19: ... continued from previous page ...

| Species | Ref.               | MNDO  | AM1   | PM3   | PM6   | PM7   | OM1   |       | OM2   |       | OM3   |       | OM3   |       | D3T   |
|---------|--------------------|-------|-------|-------|-------|-------|-------|-------|-------|-------|-------|-------|-------|-------|-------|
|         |                    |       |       |       |       |       | D2    | D3    | D2    | D3    | D2    | D3    | D2    | D3    |       |
| c2      | 147.0 <sup>a</sup> | 103.5 | 121.7 | 83.0  | 151.3 | 137.9 | 111.6 | 147.7 | 147.8 | 148.0 | 148.0 | 125.7 | 125.7 | 126.2 | 126.2 |
| f2o     | 93.8 <sup>a</sup>  | 57.8  | 86.0  | 102.9 | 94.2  | 95.6  | 82.3  | 93.7  | 93.9  | 94.0  | 94.0  | 88.9  | 89.0  | 89.3  | 89.3  |
| fo2     | 134.7 <sup>a</sup> | 88.0  | 116.5 | 124.6 | 139.5 | 135.7 | 119.0 | 118.0 | 118.2 | 118.3 | 118.3 | 119.3 | 119.4 | 119.9 | 119.9 |
| foof    | 152.4 <sup>a</sup> | 78.5  | 126.6 | 143.6 | 160.1 | 154.0 | 132.4 | 147.5 | 147.9 | 148.0 | 148.0 | 137.7 | 137.9 | 138.6 | 138.6 |
| o3      | 147.4 <sup>a</sup> | 118.3 | 118.9 | 125.8 | 126.0 | 137.6 | 131.6 | 143.2 | 143.3 | 143.5 | 143.5 | 132.9 | 132.9 | 133.5 | 133.5 |
| BDE99   |                    |       |       |       |       |       |       |       |       |       |       |       |       |       |       |
| fo2     | 17.6 <sup>a</sup>  | -11.5 | 8.6   | 18.4  | 19.8  | 17.5  | 12.1  | 28.0  | 28.2  | 28.2  | 28.2  | 17.1  | 17.3  | 17.5  | 17.5  |
| of      | 46.2 <sup>a</sup>  | -9.6  | 22.1  | 28.6  | 79.6  | 62.2  | 42.8  | 47.0  | 47.4  | 47.4  | 47.4  | 39.8  | 40.1  | 40.3  | 40.3  |
| o       | 81.7 <sup>a</sup>  | 43.1  | 63.7  | 66.3  | 98.7  | 89.2  | 73.5  | 67.1  | 67.2  | 67.3  | 67.3  | 69.6  | 69.7  | 70.0  | 70.0  |
| o2      | 13.9 <sup>a</sup>  | -40.5 | -13.5 | 1.2   | 9.1   | 10.4  | -8.7  | -0.6  | -0.5  | -0.4  | -0.4  | -5.0  | -4.9  | -4.7  | -4.7  |
| f       | 40.7 <sup>a</sup>  | 13.1  | 33.7  | 45.0  | 53.4  | 49.1  | 37.1  | 43.0  | 43.1  | 43.1  | 43.1  | 39.4  | 39.5  | 39.7  | 39.7  |
| of      | 105.6 <sup>a</sup> | 89.6  | 100.3 | 102.8 | 108.7 | 102.7 | 102.1 | 100.2 | 100.3 | 100.3 | 100.3 | 98.9  | 98.9  | 99.1  | 99.1  |
| f       | 51.5 <sup>a</sup>  | 20.4  | 40.0  | 50.9  | 50.3  | 43.4  | 37.4  | 42.1  | 42.2  | 42.2  | 42.2  | 39.4  | 39.4  | 39.6  | 39.6  |
| o       | 75.1 <sup>a</sup>  | 64.1  | 74.2  | 75.6  | 93.9  | 85.6  | 72.5  | 77.3  | 77.4  | 77.6  | 77.6  | 73.2  | 73.2  | 73.6  | 73.6  |
| n       | 118.1 <sup>a</sup> | 83.6  | 88.1  | 103.3 | 113.5 | 108.1 | 99.2  | 111.9 | 112.0 | 112.2 | 112.2 | 92.4  | 92.5  | 93.0  | 93.0  |
| o       | 42.4 <sup>a</sup>  | 36.8  | 42.1  | 51.6  | 72.7  | 65.3  | 34.8  | 36.4  | 36.6  | 36.7  | 36.7  | 35.0  | 35.0  | 35.5  | 35.5  |
| no2     | 84.8 <sup>a</sup>  | 81.8  | 74.2  | 66.0  | 63.2  | 71.6  | 74.7  | 75.3  | 75.4  | 75.5  | 75.5  | 76.9  | 77.0  | 77.2  | 77.2  |
| no      | 52.7 <sup>a</sup>  | 35.5  | 37.9  | 33.6  | 59.8  | 53.5  | 39.8  | 46.4  | 46.7  | 46.8  | 46.8  | 43.6  | 43.7  | 44.2  | 44.2  |
| cn      | 116.8 <sup>a</sup> | 113.6 | 118.1 | 123.5 | 109.9 | 118.4 | 131.5 | 119.8 | 120.0 | 120.0 | 120.0 | 126.2 | 126.2 | 126.5 | 126.5 |
| c       | 215.1 <sup>a</sup> | 179.8 | 200.5 | 189.7 | 207.8 | 214.0 | 217.6 | 212.3 | 212.5 | 212.6 | 212.6 | 220.9 | 220.9 | 221.4 | 221.4 |
| cn      | 61.6 <sup>a</sup>  | 66.3  | 58.5  | 67.8  | 65.7  | 66.5  | 86.3  | 62.6  | 62.9  | 63.0  | 63.0  | 62.7  | 62.9  | 63.5  | 63.5  |
| co      | 91.9 <sup>a</sup>  | 82.0  | 88.0  | 69.3  | 88.8  | 84.9  | 68.8  | 71.8  | 72.1  | 72.2  | 72.2  | 74.3  | 74.4  | 75.0  | 75.0  |
| no      | 128.0 <sup>a</sup> | 94.0  | 108.1 | 132.8 | 146.4 | 137.8 | 101.9 | 119.3 | 119.6 | 119.7 | 119.7 | 111.4 | 111.4 | 111.9 | 111.9 |
| no      | 53.1 <sup>a</sup>  | 45.8  | 48.6  | 50.2  | 50.1  | 53.8  | 49.9  | 56.3  | 56.4  | 56.5  | 56.5  | 57.6  | 57.6  | 57.9  | 57.9  |
| o       | 122.8 <sup>a</sup> | 128.8 | 131.2 | 117.4 | 112.7 | 120.3 | 131.3 | 124.3 | 124.4 | 124.5 | 124.5 | 128.8 | 128.9 | 129.2 | 129.2 |
| oh      | 98.4 <sup>a</sup>  | 82.8  | 88.3  | 84.8  | 90.9  | 84.9  | 91.3  | 86.9  | 87.4  | 87.3  | 87.3  | 87.5  | 87.9  | 88.3  | 88.3  |
| oh      | 131.1 <sup>a</sup> | 128.8 | 128.6 | 133.1 | 138.7 | 130.4 | 133.4 | 135.0 | 135.2 | 135.3 | 135.3 | 131.1 | 131.2 | 131.7 | 131.7 |
| h       | 43.0 <sup>a</sup>  | 40.2  | 37.2  | 27.1  | 35.4  | 36.5  | 39.1  | 42.7  | 42.8  | 42.9  | 42.9  | 37.7  | 37.7  | 38.0  | 38.0  |
| oh      | 115.3 <sup>a</sup> | 93.9  | 97.9  | 88.5  | 100.5 | 96.8  | 89.8  | 90.3  | 90.7  | 90.8  | 90.8  | 85.9  | 86.1  | 86.7  | 86.7  |
| o       | 173.5 <sup>a</sup> | 187.6 | 177.1 | 177.1 | 173.3 | 171.2 | 155.6 | 149.1 | 149.4 | 149.4 | 149.4 | 154.8 | 154.9 | 155.2 | 155.2 |
| co      | 83.0 <sup>a</sup>  | 80.6  | 82.9  | 65.5  | 84.9  | 84.0  | 70.9  | 77.7  | 78.1  | 78.2  | 78.2  | 81.1  | 81.2  | 82.0  | 82.0  |
| hco     | 76.3 <sup>a</sup>  | 69.3  | 63.1  | 49.3  | 47.3  | 55.3  | 52.8  | 60.5  | 61.3  | 61.3  | 61.3  | 56.1  | 56.6  | 57.3  | 57.3  |
| hco     | 90.6 <sup>a</sup>  | 71.2  | 74.0  | 66.4  | 67.5  | 70.9  | 76.8  | 78.3  | 79.2  | 79.1  | 79.1  | 78.3  | 78.9  | 79.6  | 79.6  |
| o       | 161.8 <sup>a</sup> | 129.8 | 134.0 | 150.6 | 136.1 | 128.7 | 141.4 | 136.7 | 136.9 | 137.0 | 137.0 | 139.9 | 140.0 | 140.4 | 140.4 |
| f       | 124.3 <sup>a</sup> | 108.5 | 110.3 | 98.0  | 102.9 | 103.9 | 99.2  | 102.7 | 103.0 | 103.0 | 103.0 | 101.3 | 101.4 | 101.7 | 101.7 |
| h       | 95.2 <sup>a</sup>  | 88.9  | 85.7  | 78.8  | 73.7  | 79.1  | 81.3  | 83.2  | 83.4  | 83.4  | 83.4  | 80.9  | 81.0  | 81.2  | 81.2  |
| o       | 183.9 <sup>a</sup> | 171.2 | 172.5 | 170.1 | 161.4 | 169.8 | 185.0 | 181.5 | 181.7 | 181.8 | 181.8 | 180.7 | 180.7 | 181.2 | 181.2 |
| co      | 19.7 <sup>a</sup>  | 43.7  | 46.1  | 39.7  | 37.5  | 32.3  | 26.9  | 33.0  | 33.1  | 33.1  | 33.1  | 36.3  | 36.4  | 36.6  | 36.6  |
| o       | 195.2 <sup>a</sup> | 199.0 | 201.8 | 214.0 | 200.6 | 197.7 | 201.7 | 198.4 | 198.6 | 198.6 | 198.6 | 200.0 | 200.0 | 200.3 | 200.3 |
| o       | 130.4 <sup>a</sup> | 128.6 | 134.0 | 124.0 | 130.6 | 125.8 | 119.1 | 118.3 | 118.5 | 118.5 | 118.5 | 124.4 | 124.4 | 124.8 | 124.8 |
| nh2     | 108.9 <sup>a</sup> | 95.4  | 103.3 | 91.8  | 106.5 | 108.0 | 102.9 | 109.4 | 110.0 | 110.0 | 110.0 | 103.3 | 103.7 | 104.3 | 104.3 |
| h       | 42.8 <sup>a</sup>  | 51.5  | 53.8  | 52.3  | 61.4  | 57.0  | 40.3  | 43.3  | 43.5  | 43.5  | 43.5  | 43.3  | 43.5  | 43.7  | 43.7  |
| nh      | 83.7 <sup>a</sup>  | 69.3  | 73.7  | 76.4  | 73.5  | 73.9  | 77.8  | 76.3  | 76.8  | 76.9  | 76.9  | 74.6  | 74.9  | 75.5  | 75.5  |
| h       | 35.2 <sup>a</sup>  | 39.0  | 35.5  | 45.4  | 42.2  | 40.4  | 31.5  | 31.1  | 31.4  | 31.3  | 31.3  | 30.0  | 30.3  | 30.4  | 30.4  |
| h       | 100.0 <sup>a</sup> | 80.1  | 75.8  | 79.2  | 73.7  | 75.4  | 87.0  | 85.3  | 85.7  | 85.6  | 85.6  | 82.6  | 82.9  | 83.1  | 83.1  |

... continued on next page ...



Table S19: ... continued from previous page ...

| Species                     | Ref.               | MNDO  | AM1   | PM3   | PM6   | PM7   | OM1   |       | OM2   |       | OM3   |       | OM3   |       | OM3   |       | D3T   |
|-----------------------------|--------------------|-------|-------|-------|-------|-------|-------|-------|-------|-------|-------|-------|-------|-------|-------|-------|-------|
|                             |                    |       |       |       |       |       | D2    | D3    |       |
| h                           | 107.7 <sup>a</sup> | 92.6  | 94.1  | 86.0  | 92.9  | 92.0  | 95.7  | 97.5  | 97.8  | 97.8  | 95.9  | 96.1  | 96.3  | 96.3  | 96.3  | 96.3  | 96.3  |
| h                           | 103.2 <sup>a</sup> | 95.7  | 87.6  | 87.0  | 79.2  | 82.2  | 90.8  | 92.1  | 92.4  | 92.4  | 86.9  | 87.1  | 87.3  | 87.3  | 87.3  | 87.3  | 87.3  |
| ch                          | 168.9 <sup>a</sup> | 156.9 | 168.6 | 165.6 | 169.4 | 166.6 | 160.3 | 163.7 | 163.9 | 164.0 | 165.0 | 165.1 | 165.6 | 165.6 | 165.6 | 165.6 | 165.6 |
| h                           | 22.8 <sup>a</sup>  | 23.3  | 27.7  | 27.8  | 29.3  | 26.8  | 19.1  | 16.5  | 16.7  | 16.8  | 26.8  | 26.8  | 27.2  | 27.2  | 27.2  | 27.2  | 27.2  |
| h                           | 132.1 <sup>a</sup> | 146.5 | 136.4 | 147.4 | 123.3 | 127.5 | 140.7 | 137.4 | 137.5 | 137.6 | 128.1 | 128.2 | 128.4 | 128.4 | 128.4 | 128.4 | 128.4 |
| n                           | 229.2 <sup>a</sup> | 221.4 | 227.1 | 227.2 | 221.7 | 222.7 | 225.8 | 226.8 | 227.0 | 227.1 | 227.1 | 223.2 | 223.6 | 223.6 | 223.6 | 223.6 | 223.6 |
| cn                          | 139.3 <sup>a</sup> | 193.0 | 162.7 | 179.1 | 134.6 | 139.3 | 154.1 | 148.1 | 148.6 | 148.7 | 133.8 | 134.0 | 134.7 | 134.7 | 134.7 | 134.7 | 134.7 |
| o                           | 57.8 <sup>a</sup>  | 31.9  | 45.4  | 57.0  | 61.9  | 59.8  | 47.4  | 48.5  | 48.7  | 48.8  | 49.1  | 49.3  | 49.6  | 49.6  | 49.6  | 49.6  | 49.6  |
| o2                          | 5.3 <sup>a</sup>   | -37.7 | -28.5 | -1.7  | -3.6  | -2.6  | -13.2 | 0.0   | 0.3   | 0.4   | -8.7  | -8.6  | -8.2  | -8.2  | -8.2  | -8.2  | -8.2  |
| o3                          | 85.9 <sup>a</sup>  | 84.1  | 94.6  | 105.3 | 98.5  | 89.5  | 91.1  | 82.3  | 82.4  | 82.4  | 89.9  | 90.0  | 90.2  | 90.2  | 90.2  | 90.2  | 90.2  |
| o                           | 26.6 <sup>a</sup>  | -11.3 | -12.6 | 1.0   | -4.8  | 11.7  | 3.2   | 23.9  | 24.0  | 24.1  | 7.9   | 7.9   | 8.3   | 8.3   | 8.3   | 8.3   | 8.3   |
| h                           | 93.6 <sup>a</sup>  | 77.0  | 83.8  | 91.3  | 85.0  | 87.2  | 85.1  | 81.2  | 81.4  | 81.4  | 83.6  | 83.7  | 83.9  | 83.9  | 83.9  | 83.9  | 83.9  |
| oh                          | 54.7 <sup>a</sup>  | 21.9  | 26.7  | 45.8  | 50.6  | 44.3  | 42.1  | 42.3  | 42.5  | 42.6  | 40.8  | 41.0  | 41.3  | 41.3  | 41.3  | 41.3  | 41.3  |
| o                           | 68.3 <sup>a</sup>  | 55.3  | 53.4  | 62.5  | 62.9  | 60.9  | 64.5  | 67.2  | 67.3  | 67.4  | 63.7  | 64.0  | 64.0  | 64.0  | 64.0  | 64.0  | 64.0  |
| h                           | 54.7 <sup>a</sup>  | 40.8  | 36.6  | 49.3  | 31.8  | 41.5  | 46.9  | 57.7  | 57.8  | 57.8  | 48.6  | 48.6  | 48.9  | 48.9  | 48.9  | 48.9  | 48.9  |
| h                           | 125.8 <sup>a</sup> | 113.9 | 112.5 | 108.9 | 120.6 | 117.8 | 113.0 | 113.7 | 113.8 | 113.8 | 113.5 | 113.5 | 113.7 | 113.7 | 113.7 | 113.7 | 113.7 |
| nh                          | 20.2 <sup>a</sup>  | 11.9  | 13.7  | 16.9  | 47.7  | 40.4  | 4.1   | 14.1  | 14.3  | 14.6  | 2.9   | 3.0   | 3.7   | 3.7   | 3.7   | 3.7   | 3.7   |
| nh2                         | 73.1 <sup>a</sup>  | 56.8  | 59.9  | 51.2  | 70.4  | 67.9  | 67.3  | 70.4  | 71.0  | 71.0  | 57.7  | 58.2  | 58.7  | 58.7  | 58.7  | 58.7  | 58.7  |
| nh                          | 130.3 <sup>a</sup> | 120.4 | 122.9 | 109.6 | 115.5 | 117.7 | 126.1 | 126.9 | 127.1 | 127.3 | 128.8 | 128.9 | 129.4 | 129.4 | 129.4 | 129.4 | 129.4 |
| n                           | 141.8 <sup>a</sup> | 141.8 | 145.4 | 138.2 | 132.3 | 135.8 | 148.5 | 150.5 | 150.6 | 150.8 | 148.3 | 148.4 | 148.8 | 148.8 | 148.8 | 148.8 | 148.8 |
| h                           | 115.4 <sup>a</sup> | 95.6  | 97.3  | 91.4  | 99.4  | 98.2  | 97.7  | 103.9 | 104.0 | 104.1 | 101.4 | 101.4 | 101.7 | 101.7 | 101.7 | 101.7 | 101.7 |
| h                           | 99.5 <sup>a</sup>  | 91.8  | 91.6  | 90.3  | 90.7  | 90.7  | 90.4  | 89.5  | 89.6  | 89.6  | 91.7  | 91.7  | 92.0  | 92.0  | 92.0  | 92.0  | 92.0  |
| ch2-trip                    | 153.4 <sup>a</sup> | 157.0 | 148.8 | 137.9 | 139.3 | 141.2 | 132.1 | 132.6 | 133.2 | 133.3 | 131.6 | 131.6 | 132.3 | 132.3 | 132.3 | 132.3 | 132.3 |
| ch3                         | 131.6 <sup>a</sup> | 152.8 | 152.4 | 151.6 | 117.6 | 119.9 | 138.7 | 127.9 | 128.6 | 128.6 | 127.0 | 127.3 | 128.1 | 128.1 | 128.1 | 128.1 | 128.1 |
| ch3                         | 107.6 <sup>a</sup> | 88.7  | 91.7  | 88.6  | 86.1  | 88.1  | 98.6  | 96.4  | 97.6  | 97.5  | 96.3  | 97.2  | 97.9  | 97.9  | 97.9  | 97.9  | 97.9  |
| f                           | 127.8 <sup>a</sup> | 120.9 | 120.5 | 112.8 | 114.8 | 114.3 | 118.2 | 118.2 | 118.6 | 118.5 | 116.8 | 117.1 | 117.3 | 117.3 | 117.3 | 117.3 | 117.3 |
| ch3                         | 97.3 <sup>a</sup>  | 70.3  | 78.0  | 77.5  | 73.4  | 75.6  | 93.2  | 88.3  | 89.3  | 89.1  | 90.6  | 91.2  | 91.9  | 91.9  | 91.9  | 91.9  | 91.9  |
| ch2-trip                    | 182.6 <sup>a</sup> | 142.4 | 147.3 | 136.1 | 146.2 | 155.1 | 170.5 | 171.4 | 172.0 | 172.1 | 166.4 | 166.7 | 167.5 | 167.5 | 167.5 | 167.5 | 167.5 |
| h                           | 86.2 <sup>a</sup>  | 105.4 | 97.1  | 95.2  | 85.0  | 82.1  | 71.7  | 70.5  | 70.7  | 70.7  | 72.0  | 72.1  | 72.3  | 72.3  | 72.3  | 72.3  | 72.3  |
| h                           | 40.6 <sup>a</sup>  | 41.2  | 38.4  | 37.4  | 46.0  | 45.8  | 38.8  | 39.3  | 39.5  | 39.6  | 40.9  | 41.0  | 41.3  | 41.3  | 41.3  | 41.3  | 41.3  |
| c                           | 169.2 <sup>a</sup> | 127.6 | 139.4 | 138.6 | 155.7 | 161.5 | 175.7 | 176.8 | 177.0 | 177.2 | 174.6 | 174.6 | 175.3 | 175.3 | 175.3 | 175.3 | 175.3 |
| f                           | 132.3 <sup>a</sup> | 172.5 | 169.9 | 163.2 | 132.3 | 133.3 | 139.6 | 130.4 | 130.6 | 130.6 | 131.0 | 131.1 | 131.3 | 131.3 | 131.3 | 131.3 | 131.3 |
| cf                          | 181.5 <sup>a</sup> | 166.7 | 167.8 | 182.8 | 168.9 | 160.7 | 163.5 | 164.4 | 164.7 | 164.7 | 165.8 | 165.9 | 166.4 | 166.4 | 166.4 | 166.4 | 166.4 |
| h                           | 139.4 <sup>a</sup> | 163.3 | 163.7 | 163.9 | 129.9 | 132.6 | 146.2 | 136.9 | 137.1 | 137.1 | 134.0 | 134.1 | 134.3 | 134.3 | 134.3 | 134.3 | 134.3 |
| ch                          | 237.1 <sup>a</sup> | 229.3 | 235.2 | 243.3 | 226.7 | 221.5 | 221.0 | 225.4 | 225.7 | 225.8 | 221.3 | 221.4 | 221.8 | 221.8 | 221.8 | 221.8 | 221.8 |
| f                           | 115.1 <sup>a</sup> | 103.9 | 110.0 | 101.9 | 101.0 | 96.6  | 110.0 | 112.5 | 112.8 | 112.8 | 110.2 | 110.3 | 110.6 | 110.6 | 110.6 | 110.6 | 110.6 |
| h                           | 112.5 <sup>a</sup> | 89.3  | 91.2  | 94.9  | 93.2  | 95.2  | 102.7 | 105.3 | 105.5 | 105.5 | 105.7 | 105.7 | 105.7 | 105.7 | 105.7 | 105.7 | 105.7 |
| h                           | 117.1 <sup>a</sup> | 105.4 | 102.9 | 98.8  | 104.4 | 108.1 | 106.7 | 110.4 | 110.6 | 110.6 | 107.1 | 107.3 | 107.5 | 107.5 | 107.5 | 107.5 | 107.5 |
| h                           | 106.5 <sup>a</sup> | 116.8 | 115.0 | 122.7 | 112.9 | 107.1 | 98.1  | 100.1 | 100.2 | 100.2 | 100.2 | 100.3 | 100.4 | 100.4 | 100.4 | 100.4 | 100.4 |
| f                           | 126.1 <sup>a</sup> | 122.0 | 124.6 | 122.1 | 130.5 | 133.3 | 125.8 | 127.0 | 127.1 | 127.1 | 126.5 | 126.5 | 126.8 | 126.8 | 126.8 | 126.8 | 126.8 |
| BDE99 (ZPVE-exclusive, 0 K) |                    |       |       |       |       |       |       |       |       |       |       |       |       |       |       |       |       |
| fo2                         | 17.6 <sup>a</sup>  | -9.5  | 10.1  | 19.0  | 20.6  | 18.4  | 13.4  | 29.5  | 29.7  | 29.7  | 18.4  | 18.5  | 18.7  | 18.7  | 18.7  | 18.7  | 18.7  |
| of                          | 46.2 <sup>a</sup>  | -7.5  | 24.6  | 29.6  | 80.9  | 63.4  | 44.6  | 48.8  | 49.2  | 49.2  | 41.5  | 41.7  | 42.0  | 42.0  | 42.0  | 42.0  | 42.0  |
| o                           | 81.7 <sup>a</sup>  | 45.0  | 65.5  | 67.6  | 100.0 | 90.4  | 75.1  | 68.7  | 68.8  | 68.9  | 71.2  | 71.3  | 71.6  | 71.6  | 71.6  | 71.6  | 71.6  |
| o2                          | 13.9 <sup>a</sup>  | -39.6 | -12.9 | 1.3   | 9.7   | 11.0  | -8.0  | 0.4   | 0.6   | 0.6   | -4.2  | -4.1  | -3.9  | -3.9  | -3.9  | -3.9  | -3.9  |

... continued on next page ...

Table S19: . . . continued from previous page . . .

| Species | Ref.               | MNDO  | AM1   | PM3   | PM6   | PM7   | OM1   |       | OM2   |       | OM3   |       | OM3   |       | D3T   |
|---------|--------------------|-------|-------|-------|-------|-------|-------|-------|-------|-------|-------|-------|-------|-------|-------|
|         |                    |       |       |       |       |       | D2    | D3    | D2    | D3    | D2    | D3    | D2    | D3    |       |
| f       | 40.7 <sup>a</sup>  | 14.8  | 35.0  | 45.9  | 54.7  | 50.3  | 38.5  | 44.4  | 44.6  | 44.6  | 40.8  | 40.8  | 40.8  | 41.1  | 41.1  |
| of      | 105.6 <sup>a</sup> | 96.1  | 106.4 | 109.3 | 113.2 | 107.5 | 108.3 | 105.3 | 105.4 | 105.4 | 104.5 | 104.5 | 104.5 | 104.7 | 104.7 |
| f       | 51.5 <sup>a</sup>  | 23.7  | 42.6  | 53.4  | 52.6  | 45.7  | 40.0  | 44.7  | 44.8  | 44.8  | 41.9  | 41.9  | 41.9  | 42.2  | 42.2  |
| n       | 75.1 <sup>a</sup>  | 66.1  | 76.4  | 77.4  | 95.7  | 87.4  | 74.3  | 78.9  | 79.0  | 79.1  | 74.7  | 74.7  | 74.7  | 75.2  | 75.2  |
| o       | 118.1 <sup>a</sup> | 86.2  | 91.0  | 105.9 | 116.4 | 111.0 | 101.8 | 114.4 | 114.7 | 114.7 | 94.5  | 94.5  | 94.5  | 95.1  | 95.1  |
| o       | 42.4 <sup>a</sup>  | 39.2  | 44.6  | 53.8  | 75.0  | 67.6  | 38.2  | 38.3  | 38.5  | 38.5  | 36.7  | 36.7  | 36.7  | 37.2  | 37.2  |
| no2     | 84.8 <sup>a</sup>  | 88.6  | 80.0  | 71.9  | 67.3  | 76.2  | 80.8  | 80.4  | 80.6  | 80.6  | 82.4  | 82.4  | 82.4  | 82.7  | 82.7  |
| no      | 52.7 <sup>a</sup>  | 39.3  | 41.7  | 36.4  | 62.8  | 56.5  | 42.9  | 49.4  | 49.8  | 49.8  | 46.5  | 46.5  | 46.5  | 47.1  | 47.1  |
| cn      | 116.8 <sup>a</sup> | 119.3 | 124.0 | 129.1 | 114.4 | 123.2 | 137.2 | 125.3 | 125.5 | 125.5 | 131.9 | 131.9 | 132.0 | 132.3 | 132.3 |
| c       | 215.1 <sup>a</sup> | 183.7 | 204.9 | 193.2 | 211.5 | 218.0 | 221.7 | 216.7 | 216.8 | 217.0 | 225.2 | 225.2 | 225.3 | 225.8 | 225.8 |
| cn      | 61.6 <sup>a</sup>  | 69.9  | 62.1  | 70.8  | 68.7  | 69.5  | 89.3  | 65.7  | 66.0  | 66.1  | 65.8  | 65.8  | 65.9  | 66.5  | 66.5  |
| co      | 91.9 <sup>a</sup>  | 85.7  | 91.7  | 72.3  | 92.3  | 88.6  | 72.3  | 75.4  | 75.6  | 75.8  | 77.5  | 77.5  | 77.6  | 78.2  | 78.2  |
| no      | 128.0 <sup>a</sup> | 98.4  | 112.5 | 137.2 | 151.2 | 142.6 | 106.3 | 123.7 | 124.0 | 124.2 | 115.2 | 115.2 | 115.4 | 115.9 | 115.9 |
| no      | 53.1 <sup>a</sup>  | 51.2  | 53.8  | 55.6  | 54.4  | 58.1  | 55.2  | 61.1  | 61.2  | 61.3  | 62.4  | 62.4  | 62.4  | 62.7  | 62.7  |
| o       | 122.8 <sup>a</sup> | 132.7 | 135.0 | 121.1 | 115.9 | 123.6 | 134.7 | 127.6 | 127.7 | 127.8 | 132.1 | 132.1 | 132.1 | 132.5 | 132.5 |
| oh      | 98.4 <sup>a</sup>  | 89.0  | 94.5  | 90.4  | 96.2  | 90.3  | 97.5  | 92.8  | 93.3  | 93.3  | 93.8  | 93.8  | 94.1  | 94.5  | 94.5  |
| oh      | 131.1 <sup>a</sup> | 134.4 | 134.0 | 138.4 | 143.4 | 135.0 | 138.5 | 139.9 | 140.1 | 140.2 | 136.1 | 136.1 | 136.1 | 136.6 | 136.6 |
| h       | 43.0 <sup>a</sup>  | 47.1  | 43.4  | 34.2  | 40.1  | 41.4  | 45.5  | 48.3  | 48.4  | 48.5  | 43.5  | 43.5  | 43.5  | 43.8  | 43.8  |
| oh      | 115.3 <sup>a</sup> | 99.5  | 103.4 | 93.0  | 105.2 | 101.6 | 95.0  | 95.5  | 95.9  | 96.0  | 90.9  | 90.9  | 91.2  | 91.7  | 91.7  |
| o       | 173.5 <sup>a</sup> | 191.1 | 180.6 | 180.3 | 176.5 | 174.4 | 158.8 | 152.0 | 152.3 | 152.3 | 157.8 | 157.8 | 158.3 | 158.3 | 158.3 |
| co      | 83.0 <sup>a</sup>  | 85.5  | 87.7  | 69.8  | 89.8  | 89.5  | 75.4  | 82.3  | 82.8  | 82.9  | 85.6  | 85.6  | 85.7  | 86.5  | 86.5  |
| hco     | 76.3 <sup>a</sup>  | 73.6  | 68.0  | 53.8  | 51.9  | 60.1  | 57.0  | 65.7  | 66.4  | 66.4  | 60.1  | 60.1  | 60.6  | 61.4  | 61.4  |
| hco     | 90.6 <sup>a</sup>  | 76.9  | 79.7  | 72.2  | 73.0  | 76.6  | 83.2  | 84.7  | 85.6  | 85.6  | 84.8  | 84.8  | 85.3  | 86.1  | 86.1  |
| o       | 161.8 <sup>a</sup> | 132.9 | 137.1 | 153.4 | 138.9 | 131.5 | 144.6 | 139.5 | 139.8 | 139.8 | 143.0 | 143.0 | 143.0 | 143.5 | 143.5 |
| f       | 124.3 <sup>a</sup> | 112.1 | 113.4 | 100.8 | 105.6 | 107.0 | 102.5 | 106.1 | 106.3 | 106.3 | 104.5 | 104.5 | 104.6 | 104.9 | 104.9 |
| h       | 95.2 <sup>a</sup>  | 95.9  | 92.4  | 85.1  | 79.7  | 85.3  | 88.4  | 89.9  | 90.1  | 90.2  | 87.5  | 87.5  | 87.6  | 87.9  | 87.9  |
| o       | 183.9 <sup>a</sup> | 176.2 | 177.4 | 174.4 | 165.9 | 174.7 | 189.3 | 186.0 | 186.2 | 186.2 | 185.2 | 185.2 | 185.2 | 185.7 | 185.7 |
| co      | 19.7 <sup>a</sup>  | 48.5  | 50.7  | 43.8  | 41.2  | 36.0  | 31.4  | 36.9  | 37.0  | 37.1  | 40.4  | 40.4  | 40.5  | 40.7  | 40.7  |
| o       | 195.2 <sup>a</sup> | 202.7 | 205.4 | 217.1 | 203.5 | 200.6 | 205.2 | 201.5 | 201.6 | 201.7 | 203.2 | 203.2 | 203.3 | 203.6 | 203.6 |
| o       | 130.4 <sup>a</sup> | 131.5 | 136.8 | 126.4 | 133.2 | 128.4 | 122.0 | 120.9 | 121.0 | 121.1 | 127.1 | 127.1 | 127.2 | 127.5 | 127.5 |
| nh2     | 108.9 <sup>a</sup> | 102.2 | 109.8 | 97.6  | 113.2 | 115.3 | 109.0 | 115.8 | 116.3 | 116.4 | 109.2 | 109.2 | 109.6 | 110.2 | 110.2 |
| h       | 42.8 <sup>a</sup>  | 57.2  | 59.3  | 57.7  | 66.0  | 61.5  | 45.5  | 47.9  | 48.2  | 48.2  | 48.1  | 48.1  | 48.3  | 48.5  | 48.5  |
| nh      | 83.7 <sup>a</sup>  | 75.0  | 79.1  | 81.4  | 78.7  | 79.5  | 84.0  | 82.2  | 82.7  | 82.8  | 80.3  | 80.3  | 80.6  | 81.2  | 81.2  |
| h       | 35.2 <sup>a</sup>  | 44.3  | 40.5  | 50.4  | 46.3  | 44.5  | 36.8  | 35.9  | 36.2  | 36.1  | 34.7  | 34.7  | 34.9  | 35.1  | 35.1  |
| h       | 100.0 <sup>a</sup> | 87.5  | 82.7  | 86.2  | 79.8  | 81.6  | 94.6  | 92.7  | 93.0  | 92.9  | 89.5  | 89.5  | 89.7  | 89.9  | 89.9  |
| h       | 107.7 <sup>a</sup> | 100.4 | 101.5 | 93.5  | 99.5  | 98.6  | 103.3 | 104.7 | 105.0 | 105.0 | 102.8 | 102.8 | 103.1 | 103.3 | 103.3 |
| h       | 103.2 <sup>a</sup> | 103.4 | 94.6  | 93.8  | 85.8  | 88.9  | 98.4  | 99.3  | 99.6  | 99.6  | 94.0  | 94.0  | 94.2  | 94.4  | 94.4  |
| ch      | 168.9 <sup>a</sup> | 162.3 | 174.1 | 170.4 | 174.5 | 171.8 | 166.0 | 169.3 | 169.5 | 169.7 | 170.1 | 170.1 | 170.2 | 170.7 | 170.7 |
| h       | 22.8 <sup>a</sup>  | 27.7  | 32.1  | 32.2  | 32.6  | 30.2  | 23.5  | 20.4  | 20.5  | 20.6  | 30.6  | 30.6  | 30.6  | 31.0  | 31.0  |
| h       | 132.1 <sup>a</sup> | 153.2 | 142.5 | 153.3 | 128.6 | 132.9 | 147.3 | 143.6 | 143.7 | 143.8 | 134.2 | 134.2 | 134.2 | 134.4 | 134.4 |
| n       | 229.2 <sup>a</sup> | 226.8 | 232.3 | 231.9 | 226.5 | 227.7 | 231.5 | 232.3 | 232.5 | 232.6 | 228.2 | 228.2 | 228.3 | 228.7 | 228.7 |
| cn      | 139.3 <sup>a</sup> | 196.6 | 166.1 | 182.6 | 137.8 | 141.8 | 157.4 | 151.7 | 152.1 | 152.2 | 137.1 | 137.1 | 137.3 | 138.0 | 138.0 |
| o       | 57.8 <sup>a</sup>  | 33.6  | 47.3  | 57.8  | 63.0  | 61.1  | 49.1  | 50.3  | 50.5  | 50.6  | 50.8  | 50.8  | 50.9  | 51.2  | 51.2  |
| o2      | 5.3 <sup>a</sup>   | -35.1 | -25.6 | 0.0   | -1.5  | -0.3  | -10.8 | 2.7   | 3.0   | 3.0   | -6.4  | -6.4  | -6.3  | -5.9  | -5.9  |
| o3      | 85.9 <sup>a</sup>  | 89.5  | 99.8  | 110.4 | 102.5 | 93.8  | 96.7  | 87.0  | 87.2  | 87.2  | 94.8  | 94.8  | 95.0  | 95.1  | 95.1  |

. . . continued on next page . . .

Table S19: ... continued from previous page ...

| Species  | Ref.                | MNDO   | AM1    | PM3    | PM6    | PM7    | OM1    |        | OM2    |        | OM3    |        | OM3    |        | OM3    |        |
|----------|---------------------|--------|--------|--------|--------|--------|--------|--------|--------|--------|--------|--------|--------|--------|--------|--------|
|          |                     |        |        |        |        |        | D2     | D3     |
| o        | 26.6 <sup>a</sup>   | -9.3   | -10.6  | 2.5    | -3.8   | 12.9   | 4.6    | 25.6   | 25.7   | 25.8   | 25.8   | 9.4    | 9.4    | 9.4    | 9.8    | 9.8    |
| h        | 93.6 <sup>a</sup>   | 83.9   | 90.2   | 97.4   | 89.9   | 92.3   | 91.7   | 86.6   | 86.8   | 86.8   | 86.8   | 89.5   | 89.6   | 89.6   | 89.7   | 89.7   |
| oh       | 54.7 <sup>a</sup>   | 27.4   | 31.9   | 50.1   | 55.0   | 48.5   | 46.5   | 46.7   | 47.0   | 47.0   | 47.0   | 45.1   | 45.2   | 45.2   | 45.6   | 45.6   |
| o        | 68.3 <sup>a</sup>   | 58.8   | 56.5   | 65.5   | 65.4   | 63.3   | 67.0   | 70.0   | 70.1   | 70.2   | 70.2   | 66.3   | 66.3   | 66.3   | 66.6   | 66.6   |
| h        | 54.7 <sup>a</sup>   | 46.6   | 41.8   | 55.1   | 35.7   | 45.7   | 52.2   | 62.3   | 62.4   | 62.4   | 62.4   | 53.4   | 53.4   | 53.4   | 53.7   | 53.7   |
| h        | 125.8 <sup>a</sup>  | 121.3  | 119.0  | 115.8  | 124.9  | 122.5  | 119.8  | 119.5  | 119.6  | 119.6  | 119.6  | 119.7  | 119.7  | 119.7  | 119.9  | 119.9  |
| nh       | 20.2 <sup>a</sup>   | 15.3   | 17.3   | 20.0   | 51.2   | 44.1   | 7.1    | 17.2   | 17.5   | 17.7   | 17.7   | 5.5    | 5.7    | 5.7    | 6.3    | 6.3    |
| nh2      | 73.1 <sup>a</sup>   | 64.6   | 67.6   | 57.3   | 77.8   | 75.7   | 74.2   | 77.4   | 77.9   | 78.0   | 78.0   | 63.9   | 64.4   | 64.9   | 64.9   | 64.9   |
| nh       | 130.3 <sup>a</sup>  | 127.2  | 129.6  | 116.0  | 121.8  | 124.2  | 132.7  | 133.3  | 133.5  | 133.7  | 133.7  | 134.6  | 134.7  | 135.2  | 135.2  | 135.2  |
| n        | 141.8 <sup>a</sup>  | 144.9  | 148.6  | 141.3  | 135.3  | 139.0  | 151.4  | 153.4  | 153.5  | 153.7  | 153.7  | 150.6  | 150.6  | 151.0  | 151.0  | 151.0  |
| h        | 115.4 <sup>a</sup>  | 104.0  | 105.2  | 99.5   | 106.3  | 105.0  | 105.9  | 111.8  | 111.9  | 111.9  | 111.9  | 108.8  | 108.8  | 109.1  | 109.1  | 109.1  |
| h        | 99.5 <sup>a</sup>   | 98.3   | 97.7   | 96.4   | 95.7   | 95.7   | 96.7   | 95.3   | 95.4   | 95.4   | 95.4   | 97.4   | 97.4   | 97.4   | 97.6   | 97.6   |
| ch2-trip | 153.4 <sup>a</sup>  | 163.8  | 155.5  | 144.1  | 145.8  | 148.3  | 138.2  | 138.9  | 139.5  | 139.5  | 139.5  | 137.2  | 137.2  | 137.5  | 138.2  | 138.2  |
| ch3      | 131.6 <sup>a</sup>  | 154.2  | 156.2  | 155.3  | 121.3  | 123.4  | 144.6  | 133.8  | 134.5  | 134.5  | 134.5  | 121.5  | 121.7  | 122.6  | 122.6  | 122.6  |
| ch3      | 107.6 <sup>a</sup>  | 94.9   | 98.2   | 95.1   | 92.0   | 94.3   | 105.0  | 102.9  | 104.0  | 103.9  | 103.9  | 102.6  | 103.5  | 104.3  | 104.3  | 104.3  |
| f        | 127.8 <sup>a</sup>  | 124.8  | 124.3  | 116.2  | 117.9  | 117.8  | 121.3  | 121.5  | 121.9  | 121.8  | 121.8  | 119.9  | 120.2  | 120.4  | 120.4  | 120.4  |
| ch3      | 97.3 <sup>a</sup>   | 76.9   | 84.7   | 84.9   | 79.9   | 82.5   | 101.2  | 95.9   | 96.9   | 96.8   | 96.8   | 98.5   | 99.1   | 99.8   | 99.8   | 99.8   |
| ch2-trip | 182.6 <sup>a</sup>  | 150.7  | 155.4  | 144.0  | 154.5  | 164.4  | 178.4  | 179.8  | 180.3  | 180.4  | 180.4  | 174.2  | 174.4  | 175.3  | 175.3  | 175.3  |
| h        | 86.2 <sup>a</sup>   | 111.6  | 102.8  | 100.9  | 90.2   | 87.2   | 78.0   | 76.2   | 76.4   | 76.3   | 76.3   | 77.7   | 77.8   | 78.0   | 78.0   | 78.0   |
| h        | 40.6 <sup>a</sup>   | 45.6   | 42.3   | 41.2   | 49.4   | 49.2   | 43.8   | 43.9   | 44.1   | 44.2   | 44.2   | 45.4   | 45.5   | 45.9   | 45.9   | 45.9   |
| c        | 169.2 <sup>a</sup>  | 131.5  | 143.0  | 142.1  | 159.4  | 165.8  | 179.7  | 181.0  | 181.2  | 181.4  | 181.4  | 178.6  | 178.6  | 179.3  | 179.3  | 179.3  |
| f        | 132.3 <sup>a</sup>  | 171.8  | 171.3  | 164.5  | 133.3  | 134.3  | 142.4  | 133.3  | 133.6  | 133.5  | 133.5  | 122.5  | 122.5  | 122.8  | 122.8  | 122.8  |
| cf       | 181.5 <sup>a</sup>  | 172.4  | 173.2  | 188.2  | 174.2  | 166.3  | 169.3  | 169.7  | 170.1  | 170.1  | 170.1  | 171.2  | 171.4  | 171.8  | 171.8  | 171.8  |
| h        | 139.4 <sup>a</sup>  | 166.6  | 169.0  | 168.9  | 134.3  | 136.8  | 153.5  | 143.7  | 143.9  | 143.9  | 143.9  | 129.2  | 129.3  | 129.5  | 129.5  | 129.5  |
| ch       | 237.1 <sup>a</sup>  | 237.0  | 242.6  | 250.3  | 233.6  | 228.8  | 228.9  | 232.7  | 233.0  | 233.0  | 233.0  | 228.4  | 228.5  | 229.0  | 229.0  | 229.0  |
| f        | 115.1 <sup>a</sup>  | 108.3  | 114.2  | 105.9  | 104.6  | 100.5  | 114.7  | 117.1  | 117.3  | 117.3  | 117.3  | 114.9  | 115.0  | 115.3  | 115.3  | 115.3  |
| h        | 112.5 <sup>a</sup>  | 97.0   | 98.6   | 103.4  | 99.6   | 101.7  | 111.4  | 113.5  | 113.7  | 113.7  | 113.7  | 113.7  | 113.7  | 114.0  | 114.0  | 114.0  |
| h        | 117.1 <sup>a</sup>  | 112.6  | 109.6  | 105.3  | 110.5  | 114.5  | 113.0  | 116.8  | 116.9  | 117.0  | 117.0  | 112.9  | 113.0  | 113.3  | 113.3  | 113.3  |
| h        | 106.5 <sup>a</sup>  | 122.4  | 120.4  | 127.8  | 117.3  | 111.2  | 104.3  | 105.5  | 105.6  | 105.6  | 105.6  | 105.5  | 105.7  | 105.8  | 105.8  | 105.8  |
| f        | 126.1 <sup>a</sup>  | 124.0  | 126.3  | 123.9  | 131.9  | 134.9  | 127.3  | 128.5  | 128.7  | 128.7  | 128.7  | 128.0  | 128.1  | 128.3  | 128.3  | 128.3  |
| HA1707   |                     |        |        |        |        |        |        |        |        |        |        |        |        |        |        |        |
| ch3      | -26.6 <sup>a</sup>  | -25.3  | -30.0  | -31.5  | -31.9  | -36.1  | -29.4  | -20.0  | -19.8  | -19.9  | -19.9  | -25.0  | -24.9  | -24.7  | -24.7  | -24.7  |
| fo2      | -124.0 <sup>a</sup> | -140.7 | -131.4 | -115.0 | -113.1 | -115.2 | -127.2 | -104.6 | -104.4 | -104.5 | -104.5 | -118.1 | -117.9 | -117.8 | -117.8 | -117.8 |
| f2o      | -48.6 <sup>a</sup>  | -91.9  | -71.9  | -68.3  | -32.3  | -46.2  | -58.9  | -54.1  | -53.8  | -53.9  | -53.9  | -59.2  | -59.0  | -58.9  | -58.9  | -58.9  |
| of       | -25.6 <sup>a</sup>  | -67.3  | -46.8  | -41.7  | 1.4    | -14.6  | -33.9  | -39.1  | -38.9  | -38.9  | -38.9  | -36.8  | -36.8  | -36.6  | -36.6  | -36.6  |
| o2       | -127.7 <sup>a</sup> | -169.7 | -153.5 | -132.2 | -123.7 | -122.3 | -148.1 | -133.2 | -133.1 | -133.1 | -133.1 | -140.2 | -140.1 | -140.0 | -140.0 | -140.0 |
| of       | -100.9 <sup>a</sup> | -116.1 | -106.3 | -88.3  | -79.4  | -83.6  | -102.3 | -89.6  | -89.5  | -89.5  | -89.5  | -95.8  | -95.7  | -95.6  | -95.6  | -95.6  |
| f2       | -52.5 <sup>a</sup>  | -69.2  | -86.7  | -64.0  | -42.4  | -63.9  | -51.4  | -50.3  | -50.1  | -50.2  | -50.2  | -53.1  | -53.0  | -52.9  | -52.9  | -52.9  |
| hf       | -90.2 <sup>a</sup>  | -108.8 | -100.0 | -82.5  | -82.6  | -89.3  | -101.9 | -90.5  | -90.4  | -90.4  | -90.4  | -95.8  | -95.8  | -95.7  | -95.7  | -95.7  |
| o        | -88.6 <sup>a</sup>  | -88.0  | -89.8  | -77.3  | -94.0  | -88.2  | -96.6  | -84.6  | -84.6  | -84.5  | -84.5  | -88.3  | -88.3  | -88.2  | -88.2  | -88.2  |
| f        | -54.1 <sup>a</sup>  | -69.2  | -60.3  | -52.0  | -58.4  | -59.3  | -64.7  | -58.1  | -58.1  | -58.1  | -58.1  | -59.5  | -59.5  | -59.5  | -59.5  | -59.5  |
| no       | -32.1 <sup>a</sup>  | -46.4  | -36.3  | -32.4  | -3.4   | -18.1  | -34.9  | -28.8  | -28.7  | -28.7  | -28.7  | -33.3  | -33.3  | -33.0  | -33.0  | -33.0  |
| o2       | 24.0 <sup>a</sup>   | 22.2   | 29.5   | 21.7   | 28.1   | 28.9   | 28.8   | 29.6   | 29.7   | 29.8   | 29.8   | 22.9   | 22.9   | 23.2   | 23.2   | 23.2   |
| n2       | -64.8 <sup>a</sup>  | -73.6  | -68.4  | -56.4  | -24.6  | -38.5  | -72.7  | -69.7  | -69.6  | -69.5  | -69.5  | -71.5  | -71.5  | -71.2  | -71.2  | -71.2  |
| no       | 35.0 <sup>a</sup>   | -4.2   | 1.9    | 13.8   | 31.9   | 25.2   | 14.6   | 32.2   | 32.3   | 32.4   | 32.4   | 7.5    | 7.5    | 7.9    | 7.9    | 7.9    |

... continued on next page ...

Table S19: . . . continued from previous page . . .

| Species  | Ref.               | MNDO   | AM1    | PM3    | PM6    | PM7   | OM1    |       | OM2   |       | OM3   |       | OM3   |       | D3T   |
|----------|--------------------|--------|--------|--------|--------|-------|--------|-------|-------|-------|-------|-------|-------|-------|-------|
|          |                    |        |        |        |        |       | D2     | D3    | D2    | D3    | D2    | D3    | D2    | D3    |       |
| hno      | -0.5 <sup>a</sup>  | -10.3  | -10.7  | -16.6  | 9.7    | -0.3  | -10.1  | -9.9  | -9.7  | -9.7  | -14.0 | -13.9 | -13.7 | -13.7 | -13.7 |
| hoo      | 54.0 <sup>a</sup>  | 63.2   | 67.1   | 38.3   | 59.5   | 59.1  | 56.7   | 47.2  | 47.3  | 47.4  | 51.1  | 51.2  | 51.5  | 51.5  | 51.5  |
| hco      | 72.2 <sup>a</sup>  | 38.4   | 41.9   | 29.6   | 51.2   | 52.6  | 41.9   | 38.8  | 39.0  | 39.1  | 38.0  | 38.1  | 38.4  | 38.4  | 38.4  |
| hno      | 144.6 <sup>a</sup> | 108.6  | 112.5  | 126.3  | 139.2  | 130.0 | 112.4  | 113.0 | 113.2 | 113.2 | 109.1 | 109.2 | 109.5 | 109.5 | 109.5 |
| hcn      | 14.1 <sup>a</sup>  | -6.6   | -7.7   | -2.1   | 14.5   | 6.7   | -5.0   | -16.0 | -15.8 | -15.8 | -6.7  | -6.7  | -6.4  | -6.4  | -6.4  |
| oh       | 15.6 <sup>a</sup>  | 18.4   | 20.7   | 9.4    | 15.4   | 16.5  | 23.8   | 18.2  | 18.2  | 18.3  | 22.4  | 22.4  | 22.6  | 22.6  | 22.6  |
| o        | 69.7 <sup>a</sup>  | 83.0   | 82.6   | 67.2   | 62.6   | 66.5  | 81.3   | 68.0  | 68.0  | 68.0  | 71.3  | 71.3  | 71.3  | 71.3  | 71.3  |
| n        | 45.5 <sup>a</sup>  | 60.4   | 58.3   | 48.7   | 46.8   | 45.7  | 58.5   | 41.6  | 41.6  | 41.6  | 49.7  | 49.7  | 49.8  | 49.8  | 49.8  |
| c2h2     | -56.7 <sup>a</sup> | -53.3  | -63.2  | -51.7  | -34.1  | -37.9 | -55.3  | -57.6 | -57.4 | -57.4 | -57.4 | -57.2 | -57.0 | -57.0 | -57.0 |
| c2h4     | -19.8 <sup>a</sup> | -22.4  | -26.4  | -24.5  | -13.4  | -19.3 | -20.5  | -21.0 | -20.6 | -20.8 | -24.9 | -24.7 | -24.6 | -24.6 | -24.6 |
| ch4      | -14.1 <sup>a</sup> | -6.5   | -2.9   | -10.1  | -2.3   | -10.3 | -11.5  | -18.4 | -18.1 | -18.1 | -17.9 | -17.6 | -17.4 | -17.4 | -17.4 |
| h2o      | 5.3 <sup>a</sup>   | 14.9   | 16.1   | 24.1   | 18.1   | 12.7  | 20.4   | 21.2  | 21.4  | 21.4  | 17.6  | 17.7  | 17.9  | 17.9  | 17.9  |
| ch2-trip | 24.5 <sup>a</sup>  | 12.1   | 13.5   | 10.3   | 25.8   | 23.3  | 35.4   | 34.9  | 34.9  | 35.0  | 31.0  | 30.9  | 31.3  | 31.3  | 31.3  |
| t-hcoH   | 72.2 <sup>a</sup>  | 53.7   | 60.7   | 61.5   | 65.1   | 60.3  | 50.7   | 47.6  | 47.9  | 47.9  | 48.2  | 48.4  | 48.7  | 48.7  | 48.7  |
| hco      | -10.5 <sup>a</sup> | -20.0  | -14.6  | -20.4  | -20.1  | -20.9 | -23.2  | -23.4 | -23.1 | -23.1 | -27.6 | -27.4 | -27.0 | -27.0 | -27.0 |
| hooh     | 148.6 <sup>a</sup> | 160.6  | 162.5  | 148.8  | 153.3  | 146.4 | 142.0  | 140.3 | 140.6 | 140.6 | 138.5 | 138.7 | 139.1 | 139.1 | 139.1 |
| ch2c     | 66.3 <sup>a</sup>  | 77.1   | 66.6   | 69.1   | 76.0   | 67.4  | 48.2   | 43.0  | 43.2  | 43.2  | 48.3  | 48.4  | 48.6  | 48.6  | 48.6  |
| h2co     | 74.6 <sup>a</sup>  | 64.8   | 66.1   | 69.8   | 86.6   | 79.7  | 60.8   | 61.7  | 61.9  | 62.0  | 64.1  | 64.5  | 64.5  | 64.5  | 64.5  |
| oxirene  | 71.8 <sup>a</sup>  | 70.5   | 73.8   | 69.7   | 61.5   | 59.4  | 75.6   | 77.4  | 77.7  | 77.8  | 79.2  | 79.4  | 79.9  | 79.9  | 79.9  |
| formic   | 49.0 <sup>a</sup>  | 64.0   | 56.5   | 66.8   | 50.2   | 52.4  | 57.3   | 62.5  | 63.0  | 62.9  | 63.6  | 63.9  | 64.3  | 64.3  | 64.3  |
| methanol | 80.1 <sup>a</sup>  | 77.0   | 77.1   | 87.6   | 79.9   | 79.9  | 79.8   | 83.7  | 84.2  | 84.2  | 84.3  | 84.5  | 85.0  | 85.0  | 85.0  |
| c2h4     | 6.6 <sup>a</sup>   | 6.1    | 5.9    | 12.4   | 16.2   | 10.8  | 9.2    | 9.5   | 9.9   | 9.8   | 12.4  | 12.7  | 12.9  | 12.9  | 12.9  |
| c2       | 54.6 <sup>a</sup>  | 19.4   | 23.5   | 42.6   | 38.8   | 24.9  | 33.9   | 30.5  | 30.8  | 30.8  | 33.4  | 33.5  | 33.8  | 33.8  | 33.8  |
| f2o      | 242.6 <sup>a</sup> | 269.3  | 248.4  | 231.4  | 234.5  | 230.1 | 238.2  | 227.1 | 227.4 | 227.4 | 232.5 | 232.5 | 232.9 | 232.9 | 232.9 |
| hco      | -17.3 <sup>a</sup> | -20.7  | -29.8  | -35.3  | -30.0  | -28.8 | -40.1  | -29.8 | -29.6 | -29.6 | -33.9 | -33.8 | -33.6 | -33.6 | -33.6 |
| ch2-trip | 76.7 <sup>a</sup>  | 60.7   | 62.0   | 62.1   | 64.1   | 66.0  | 77.5   | 75.4  | 75.5  | 75.6  | 74.2  | 74.2  | 74.5  | 74.5  | 74.5  |
| h2o      | 57.5 <sup>a</sup>  | 63.6   | 64.6   | 75.9   | 56.4   | 55.3  | 62.6   | 61.7  | 61.9  | 62.0  | 60.8  | 61.0  | 61.2  | 61.2  | 61.2  |
| ch       | 88.0 <sup>a</sup>  | 88.6   | 91.3   | 106.0  | 103.3  | 93.9  | 94.3   | 92.3  | 92.4  | 92.4  | 93.5  | 93.5  | 93.7  | 93.7  | 93.7  |
| co       | 23.2 <sup>a</sup>  | 18.2   | 23.5   | 15.9   | 33.3   | 22.0  | 11.7   | 12.2  | 12.3  | 12.3  | 17.9  | 17.9  | 18.2  | 18.2  | 18.2  |
| o2       | 185.1 <sup>a</sup> | 159.1  | 162.4  | 177.1  | 165.3  | 167.9 | 168.9  | 168.0 | 168.2 | 168.2 | 166.4 | 166.5 | 166.7 | 166.7 | 166.7 |
| o        | 175.5 <sup>a</sup> | 155.4  | 155.7  | 174.4  | 163.1  | 165.4 | 174.8  | 165.4 | 165.5 | 165.5 | 163.6 | 163.6 | 163.7 | 163.7 | 163.7 |
| c        | 152.5 <sup>a</sup> | 124.2  | 123.1  | 142.1  | 146.8  | 144.9 | 153.0  | 142.1 | 142.1 | 142.2 | 141.8 | 141.8 | 141.9 | 141.9 | 141.9 |
| ch       | 146.1 <sup>a</sup> | 133.6  | 140.9  | 137.8  | 140.1  | 139.8 | 141.2  | 147.1 | 147.2 | 147.3 | 138.2 | 138.3 | 138.5 | 138.5 | 138.5 |
| n        | 97.1 <sup>a</sup>  | 74.9   | 90.7   | 79.8   | 98.4   | 95.2  | 85.1   | 89.4  | 89.4  | 89.5  | 95.0  | 95.0  | 95.2  | 95.2  | 95.2  |
| c        | 98.2 <sup>a</sup>  | 66.3   | 82.4   | 66.1   | 97.8   | 95.5  | 86.1   | 92.5  | 92.5  | 92.6  | 94.7  | 94.7  | 94.9  | 94.9  | 94.9  |
| hoo      | -49.4 <sup>a</sup> | -78.5  | -65.1  | -51.0  | -35.4  | -44.0 | -60.1  | -57.6 | -57.4 | -57.4 | -57.3 | -57.2 | -57.1 | -57.1 | -57.1 |
| o2       | -80.6 <sup>a</sup> | -121.8 | -123.1 | -107.0 | -102.1 | -92.1 | -104.3 | -82.2 | -82.1 | -82.1 | -98.6 | -98.6 | -98.4 | -98.4 | -98.4 |
| h2o      | -71.1 <sup>a</sup> | -92.0  | -85.7  | -63.2  | -70.0  | -73.4 | -70.9  | -71.4 | -71.3 | -71.3 | -72.7 | -72.5 | -72.4 | -72.4 | -72.4 |
| oh       | -38.9 <sup>a</sup> | -55.1  | -57.1  | -45.5  | -34.4  | -42.9 | -43.0  | -38.9 | -38.8 | -38.8 | -42.8 | -42.8 | -42.6 | -42.6 | -42.6 |
| h2       | 16.3 <sup>a</sup>  | 12.6   | 4.7    | -7.9   | -9.0   | -18.2 | 11.4   | 7.4   | 7.4   | 7.5   | 9.5   | 9.6   | 9.7   | 9.7   | 9.7   |
| nh2      | 30.9 <sup>a</sup>  | 28.6   | 31.3   | 19.4   | 24.8   | 27.0  | 35.8   | 37.4  | 37.5  | 37.6  | 37.1  | 37.1  | 37.5  | 37.5  | 37.5  |
| c2h4     | 57.3 <sup>a</sup>  | 65.1   | 64.6   | 70.9   | 59.8   | 54.9  | 51.7   | 55.2  | 55.5  | 55.5  | 54.8  | 54.9  | 55.3  | 55.3  | 55.3  |
| c2h6     | 64.3 <sup>a</sup>  | 66.7   | 69.4   | 70.2   | 68.0   | 64.6  | 60.4   | 62.3  | 62.8  | 62.9  | 60.5  | 60.8  | 61.3  | 61.3  | 61.3  |
| ch2ch    | -13.8 <sup>a</sup> | -8.3   | -19.5  | -20.6  | -18.1  | -18.4 | -21.2  | -14.4 | -14.0 | -14.1 | -18.4 | -18.1 | -18.0 | -18.0 | -18.0 |
| ch3f     | 66.7 <sup>a</sup>  | 65.4   | 66.2   | 70.1   | 69.1   | 69.8  | 63.2   | 59.8  | 60.2  | 60.2  | 61.4  | 61.6  | 62.0  | 62.0  | 62.0  |

. . . continued on next page . . .

Table S19: . . . continued from previous page . . .

| Species  | Ref.                | MNDO   | AM1    | PM3    | PM6    | PM7    | OM1    |        | OM2    |        | OM3    |        | OM3    |        | D3T    |
|----------|---------------------|--------|--------|--------|--------|--------|--------|--------|--------|--------|--------|--------|--------|--------|--------|
|          |                     |        |        |        |        |        | D2     | D3     | D2     | D3     | D2     | D3     | D2     | D3     |        |
| ch4      | 59.5 <sup>a</sup>   | 64.4   | 68.2   | 65.1   | 61.5   | 58.8   | 59.1   | 55.9   | 56.2   | 56.3   | 56.3   | 54.1   | 54.2   | 54.7   | 54.7   |
| ch3      | 54.0 <sup>a</sup>   | 48.3   | 55.7   | 59.2   | 55.3   | 52.2   | 55.0   | 54.2   | 54.4   | 54.5   | 54.5   | 54.8   | 54.8   | 55.3   | 55.3   |
| cf2      | 43.1 <sup>a</sup>   | 48.0   | 45.0   | 57.4   | 35.9   | 23.4   | 26.8   | 26.1   | 26.4   | 26.3   | 26.3   | 31.6   | 31.7   | 31.9   | 31.9   |
| ccH      | 9.3 <sup>a</sup>    | 43.3   | 29.9   | 29.9   | -0.6   | 0.7    | 0.2    | -2.2   | -2.0   | -2.1   | -2.1   | -4.2   | -4.1   | -4.0   | -4.0   |
| ch2-trip | 130.6 <sup>a</sup>  | 112.6  | 120.6  | 120.6  | 113.7  | 114.5  | 123.0  | 125.3  | 125.5  | 125.5  | 125.5  | 121.1  | 121.1  | 121.4  | 121.4  |
| f2       | 135.5 <sup>a</sup>  | 180.7  | 138.2  | 124.8  | 153.3  | 141.3  | 152.9  | 146.3  | 146.5  | 146.4  | 146.4  | 146.0  | 146.0  | 146.2  | 146.2  |
| cf       | -15.6 <sup>a</sup>  | -7.2   | -15.5  | -11.3  | -2.4   | 0.7    | -13.6  | -5.6   | -5.5   | -5.5   | -5.5   | -8.7   | -8.7   | -8.5   | -8.5   |
| h2       | -3.0 <sup>a</sup>   | 15.5   | 7.2    | 5.9    | -16.7  | -28.9  | -3.6   | -6.2   | -6.1   | -6.1   | -6.1   | -3.8   | -3.7   | -3.7   | -3.7   |
| c        | -8.9 <sup>a</sup>   | 21.8   | 11.6   | 2.2    | 8.3    | 12.2   | -2.8   | 4.7    | 4.7    | 4.8    | 4.8    | 1.9    | 1.9    | 2.0    | 2.0    |
| f        | 48.5 <sup>a</sup>   | 71.8   | 73.7   | 59.8   | 60.2   | 61.6   | 50.9   | 54.5   | 54.5   | 54.5   | 54.5   | 52.5   | 52.5   | 52.5   | 52.5   |
| f        | -102.6 <sup>a</sup> | -116.0 | -79.9  | -76.3  | -95.5  | -79.0  | -115.6 | -97.5  | -97.5  | -97.4  | -97.4  | -102.2 | -102.2 | -102.2 | -102.2 |
| o        | 13.6 <sup>a</sup>   | 14.5   | 16.8   | 13.2   | 31.1   | 19.5   | 17.6   | 9.6    | 9.6    | 9.6    | 9.6    | 15.1   | 15.1   | 15.2   | 15.2   |
| n        | 145.4 <sup>a</sup>  | 129.9  | 128.6  | 119.0  | 103.4  | 109.4  | 145.8  | 143.5  | 143.5  | 143.5  | 143.5  | 128.7  | 128.7  | 128.8  | 128.8  |
| ch3      | -17.6 <sup>a</sup>  | -47.2  | -41.6  | -33.7  | -40.2  | -48.3  | -26.5  | -24.7  | -24.5  | -24.6  | -24.6  | -26.9  | -26.7  | -26.7  | -26.7  |
| fo2      | -115.1 <sup>a</sup> | -162.5 | -143.0 | -117.2 | -121.4 | -127.4 | -124.4 | -109.3 | -109.3 | -109.2 | -109.2 | -120.0 | -119.8 | -119.9 | -119.9 |
| f2o      | -201.1 <sup>a</sup> | -216.1 | -195.0 | -210.5 | -179.0 | -191.1 | -211.8 | -196.1 | -195.9 | -196.0 | -196.0 | -200.9 | -200.8 | -200.8 | -200.8 |
| of       | -178.1 <sup>a</sup> | -191.5 | -170.0 | -183.9 | -145.4 | -159.5 | -186.9 | -181.1 | -181.0 | -181.1 | -181.1 | -178.6 | -178.5 | -178.6 | -178.6 |
| o2       | -118.8 <sup>a</sup> | -191.6 | -165.1 | -134.4 | -134.4 | -134.5 | -145.3 | -137.9 | -137.8 | -137.8 | -137.8 | -142.1 | -142.0 | -142.0 | -142.0 |
| of       | -92.0 <sup>a</sup>  | -137.9 | -117.9 | -90.6  | -87.8  | -95.8  | -99.5  | -94.3  | -94.2  | -94.3  | -94.3  | -97.7  | -97.6  | -97.6  | -97.6  |
| f2       | -205.0 <sup>a</sup> | -193.4 | -209.8 | -206.1 | -189.2 | -208.8 | -204.3 | -192.3 | -192.2 | -192.3 | -192.3 | -194.9 | -194.8 | -194.9 | -194.9 |
| hf       | -242.7 <sup>a</sup> | -233.0 | -223.1 | -224.6 | -229.4 | -234.2 | -254.9 | -232.6 | -232.5 | -232.6 | -232.6 | -237.6 | -237.6 | -237.6 | -237.6 |
| o        | -79.7 <sup>a</sup>  | -109.8 | -101.4 | -79.5  | -102.3 | -100.5 | -93.7  | -89.3  | -89.3  | -89.3  | -89.3  | -90.1  | -90.1  | -90.2  | -90.2  |
| f        | -206.7 <sup>a</sup> | -193.4 | -183.4 | -194.1 | -205.2 | -204.2 | -217.6 | -200.2 | -200.2 | -200.3 | -200.3 | -201.3 | -201.3 | -201.4 | -201.4 |
| no       | -184.6 <sup>a</sup> | -170.5 | -159.4 | -174.5 | -150.2 | -163.0 | -187.9 | -170.9 | -170.8 | -170.8 | -170.8 | -175.1 | -175.0 | -174.9 | -174.9 |
| o2       | -74.3 <sup>a</sup>  | -44.1  | -52.9  | -44.5  | -69.8  | -66.6  | -57.2  | -62.9  | -62.8  | -62.8  | -62.8  | -71.8  | -71.8  | -71.7  | -71.7  |
| n2       | -217.4 <sup>a</sup> | -197.8 | -191.5 | -198.6 | -171.4 | -183.4 | -225.6 | -211.8 | -211.7 | -211.7 | -211.7 | -213.3 | -213.2 | -213.1 | -213.1 |
| no       | -63.2 <sup>a</sup>  | -70.5  | -80.5  | -52.3  | -66.0  | -70.3  | -71.5  | -60.3  | -60.2  | -60.2  | -60.2  | -87.2  | -87.2  | -87.1  | -87.1  |
| hno      | -153.0 <sup>a</sup> | -134.5 | -133.8 | -158.8 | -137.1 | -145.2 | -163.1 | -152.0 | -151.8 | -151.9 | -151.9 | -155.8 | -155.7 | -155.6 | -155.6 |
| hoo      | -44.2 <sup>a</sup>  | -3.1   | -15.3  | -27.8  | -38.4  | -36.4  | -29.4  | -45.3  | -45.2  | -45.2  | -45.2  | -43.6  | -43.5  | -43.4  | -43.4  |
| hco      | -26.0 <sup>a</sup>  | -27.9  | -40.5  | -36.5  | -46.6  | -42.9  | -44.1  | -53.7  | -53.5  | -53.5  | -53.5  | -56.7  | -56.6  | -56.5  | -56.5  |
| hen      | -138.4 <sup>a</sup> | -130.8 | -130.8 | -144.2 | -132.3 | -138.1 | -157.9 | -158.1 | -157.9 | -157.9 | -157.9 | -148.5 | -148.5 | -148.3 | -148.3 |
| oh       | -82.7 <sup>a</sup>  | -47.9  | -61.7  | -56.7  | -82.5  | -79.0  | -62.2  | -74.3  | -74.3  | -74.3  | -74.3  | -72.3  | -72.3  | -72.3  | -72.3  |
| o        | -28.6 <sup>a</sup>  | 16.8   | 0.2    | 1.1    | -35.3  | -29.0  | -4.7   | -24.5  | -24.5  | -24.6  | -24.6  | -23.5  | -23.5  | -23.6  | -23.6  |
| n        | -107.0 <sup>a</sup> | -63.7  | -64.8  | -93.5  | -99.9  | -99.2  | -94.4  | -100.5 | -100.5 | -100.5 | -100.5 | -92.1  | -92.1  | -92.1  | -92.1  |
| c2h2     | -209.2 <sup>a</sup> | -177.4 | -186.4 | -193.8 | -180.9 | -182.8 | -208.2 | -199.7 | -199.5 | -199.6 | -199.6 | -199.2 | -198.9 | -199.0 | -199.0 |
| c2h4     | -172.3 <sup>a</sup> | -146.6 | -149.5 | -166.6 | -160.2 | -164.2 | -173.5 | -163.1 | -162.7 | -163.0 | -163.0 | -166.7 | -166.4 | -166.5 | -166.5 |
| ch4      | -166.7 <sup>a</sup> | -130.7 | -126.1 | -152.3 | -149.1 | -155.2 | -164.4 | -160.5 | -160.2 | -160.3 | -160.3 | -159.6 | -159.4 | -159.4 | -159.4 |
| ch2-trip | -128.0 <sup>a</sup> | -112.1 | -109.6 | -131.8 | -121.0 | -121.5 | -117.6 | -107.2 | -107.1 | -107.1 | -107.1 | -110.8 | -110.8 | -110.7 | -110.7 |
| t-hcoH   | -80.3 <sup>a</sup>  | -70.5  | -62.4  | -80.7  | -81.6  | -84.6  | -102.3 | -94.4  | -94.2  | -94.2  | -94.2  | -93.5  | -93.3  | -93.2  | -93.2  |
| ch2c     | -86.2 <sup>a</sup>  | -47.0  | -56.5  | -73.1  | -70.7  | -77.5  | -104.8 | -99.1  | -98.9  | -99.0  | -99.0  | -93.5  | -93.4  | -93.3  | -93.3  |
| oxirene  | -80.7 <sup>a</sup>  | -53.7  | -49.3  | -72.4  | -85.3  | -85.5  | -77.3  | -64.7  | -64.4  | -64.4  | -64.4  | -62.6  | -62.4  | -62.0  | -62.0  |
| c2h4     | -146.0 <sup>a</sup> | -118.1 | -117.2 | -129.8 | -130.6 | -134.1 | -143.7 | -132.6 | -132.2 | -132.4 | -132.4 | -129.4 | -129.1 | -129.0 | -129.0 |
| cf2      | -97.9 <sup>a</sup>  | -104.8 | -99.6  | -99.5  | -108.0 | -120.0 | -119.0 | -111.6 | -111.3 | -111.4 | -111.4 | -108.4 | -108.3 | -108.2 | -108.2 |
| hco      | -8.4 <sup>a</sup>   | -42.5  | -41.4  | -37.5  | -38.3  | -41.0  | -37.3  | -34.5  | -34.3  | -34.4  | -34.4  | -35.8  | -35.7  | -35.6  | -35.6  |
| ch2-trip | -75.8 <sup>a</sup>  | -63.4  | -61.1  | -80.1  | -82.7  | -78.9  | -75.4  | -66.7  | -66.6  | -66.6  | -66.6  | -67.6  | -67.5  | -67.4  | -67.4  |

. . . continued on next page . . .

Table S19: . . . continued from previous page . . .

| Species  | Ref.                | MNDO   | AM1    | PM3    | PM6    | PM7    | OM1    |        | OM2    |        | OM3    |        | OM3    |        | D3T    |
|----------|---------------------|--------|--------|--------|--------|--------|--------|--------|--------|--------|--------|--------|--------|--------|--------|
|          |                     |        |        |        |        |        | D2     | D3     | D2     | D3     | D2     | D3     | D2     | D3     |        |
| ch       | -64.5 <sup>a</sup>  | -35.6  | -31.8  | -36.1  | -43.4  | -51.0  | -58.7  | -49.8  | -49.7  | -49.7  | -48.3  | -48.2  | -48.2  | -48.2  | -48.2  |
| co       | -129.3 <sup>a</sup> | -106.0 | -99.6  | -126.2 | -113.5 | -122.9 | -141.3 | -129.9 | -129.9 | -129.9 | -123.9 | -123.8 | -123.8 | -123.8 | -123.8 |
| ch       | 47.9 <sup>a</sup>   | 67.3   | 58.5   | 71.6   | 42.3   | 44.2   | 55.1   | 54.6   | 54.7   | 54.7   | 43.5   | 43.6   | 43.6   | 43.6   | 43.6   |
| o2       | -233.1 <sup>a</sup> | -245.9 | -246.2 | -249.2 | -248.9 | -237.0 | -257.2 | -224.3 | -224.2 | -224.2 | -240.4 | -240.3 | -240.3 | -240.3 | -240.3 |
| h2o      | -223.6 <sup>a</sup> | -216.2 | -208.9 | -205.3 | -216.8 | -218.3 | -223.9 | -213.5 | -213.4 | -213.4 | -214.5 | -214.3 | -214.3 | -214.3 | -214.3 |
| oh       | -191.4 <sup>a</sup> | -179.3 | -180.2 | -187.7 | -181.2 | -187.8 | -195.9 | -181.0 | -180.9 | -181.0 | -184.5 | -184.5 | -184.5 | -184.5 | -184.5 |
| h2       | -136.2 <sup>a</sup> | -111.6 | -118.4 | -150.1 | -155.8 | -163.1 | -141.6 | -134.7 | -134.7 | -134.7 | -132.2 | -132.2 | -132.2 | -132.2 | -132.2 |
| nh2      | -67.4 <sup>a</sup>  | -37.7  | -51.1  | -46.7  | -73.0  | -68.6  | -50.3  | -55.1  | -55.0  | -55.0  | -57.6  | -57.6  | -57.6  | -57.6  | -57.6  |
| ch2ch    | -4.9 <sup>a</sup>   | -30.1  | -31.1  | -22.8  | -26.4  | -30.6  | -18.4  | -19.1  | -18.7  | -18.9  | -20.3  | -20.0  | -20.0  | -20.0  | -20.0  |
| cch      | -0.4 <sup>a</sup>   | 21.4   | 18.3   | 27.6   | -8.9   | -11.6  | 3.1    | -6.9   | -6.7   | -6.8   | -6.1   | -6.0   | -6.0   | -6.0   | -6.0   |
| cf       | -6.7 <sup>a</sup>   | -29.0  | -27.0  | -13.5  | -10.7  | -11.6  | -10.8  | -10.3  | -10.2  | -10.3  | -10.6  | -10.5  | -10.5  | -10.5  | -10.5  |
| f        | -93.7 <sup>a</sup>  | -137.9 | -91.5  | -78.5  | -103.8 | -91.3  | -112.8 | -102.1 | -102.2 | -102.2 | -104.1 | -104.1 | -104.1 | -104.1 | -104.1 |
| o        | -138.9 <sup>a</sup> | -109.7 | -106.3 | -129.0 | -115.7 | -125.4 | -135.4 | -132.5 | -132.5 | -132.5 | -126.7 | -126.7 | -126.7 | -126.7 | -126.7 |
| n        | 47.1 <sup>a</sup>   | 63.6   | 46.2   | 52.8   | 5.5    | 13.9   | 59.7   | 51.0   | 51.0   | 50.9   | 34.0   | 33.9   | 33.9   | 33.9   | 33.9   |
| f2o      | -94.2 <sup>a</sup>  | -152.3 | -130.2 | -117.0 | -79.1  | -91.8  | -117.4 | -95.6  | -95.4  | -95.5  | -108.9 | -108.7 | -108.7 | -108.7 | -108.7 |
| of       | -71.1 <sup>a</sup>  | -127.7 | -105.2 | -90.4  | -45.4  | -60.3  | -92.4  | -80.6  | -80.5  | -80.6  | -86.5  | -86.5  | -86.5  | -86.5  | -86.5  |
| f2       | -98.0 <sup>a</sup>  | -129.7 | -145.0 | -112.7 | -89.2  | -109.6 | -109.9 | -91.8  | -91.7  | -91.8  | -102.8 | -102.7 | -102.8 | -102.8 | -102.8 |
| hf       | -135.7 <sup>a</sup> | -169.3 | -158.3 | -131.2 | -129.4 | -135.0 | -160.4 | -132.1 | -132.0 | -132.1 | -145.5 | -145.5 | -145.5 | -145.5 | -145.5 |
| f        | -99.7 <sup>a</sup>  | -129.6 | -118.6 | -100.6 | -105.3 | -105.0 | -123.2 | -99.7  | -99.7  | -99.7  | -109.2 | -109.2 | -109.3 | -109.3 | -109.3 |
| no       | -77.6 <sup>a</sup>  | -106.8 | -94.6  | -81.1  | -50.2  | -63.8  | -93.4  | -70.4  | -70.3  | -70.3  | -83.0  | -83.0  | -83.0  | -83.0  | -83.0  |
| o2       | -121.4 <sup>a</sup> | -107.7 | -99.1  | -97.3  | -75.3  | -80.4  | -116.9 | -113.9 | -113.8 | -113.8 | -105.8 | -105.8 | -105.7 | -105.7 | -105.7 |
| n2       | -110.4 <sup>a</sup> | -134.1 | -126.7 | -105.1 | -71.5  | -84.2  | -131.2 | -111.3 | -111.2 | -111.2 | -121.2 | -121.2 | -121.0 | -121.0 | -121.0 |
| hno      | -46.0 <sup>a</sup>  | -70.8  | -69.0  | -65.3  | -37.1  | -45.9  | -68.6  | -51.4  | -51.3  | -51.3  | -63.6  | -63.6  | -63.5  | -63.5  | -63.5  |
| hoo      | -91.4 <sup>a</sup>  | -66.7  | -61.5  | -80.6  | -43.9  | -50.3  | -89.1  | -96.3  | -96.1  | -96.1  | -77.6  | -77.5  | -77.3  | -77.3  | -77.3  |
| hco      | -73.2 <sup>a</sup>  | -91.5  | -86.7  | -89.3  | -52.1  | -56.7  | -103.8 | -104.6 | -104.5 | -104.5 | -90.7  | -90.6  | -90.4  | -90.4  | -90.4  |
| hno      | 47.5 <sup>a</sup>   | 33.7   | 21.8   | 46.5   | 40.8   | 34.8   | 27.3   | 23.5   | 23.7   | 23.7   | 14.1   | 14.2   | 14.3   | 14.3   | 14.3   |
| hcn      | -31.4 <sup>a</sup>  | -67.0  | -66.0  | -50.8  | -32.4  | -38.9  | -63.5  | -57.6  | -57.4  | -57.4  | -56.4  | -56.4  | -56.2  | -56.2  | -56.2  |
| oh       | -129.8 <sup>a</sup> | -111.5 | -107.9 | -109.6 | -88.0  | -92.9  | -121.9 | -125.3 | -125.2 | -125.2 | -106.3 | -106.3 | -106.2 | -106.2 | -106.2 |
| o        | -75.7 <sup>a</sup>  | -46.8  | -46.0  | -51.7  | -40.8  | -42.8  | -64.4  | -75.5  | -75.5  | -75.5  | -57.4  | -57.4  | -57.5  | -57.5  | -57.5  |
| c2h2     | -102.2 <sup>a</sup> | -113.7 | -121.5 | -100.4 | -81.0  | -83.5  | -113.8 | -99.2  | -98.9  | -99.0  | -107.1 | -106.9 | -106.9 | -106.9 | -106.9 |
| c2h4     | -65.3 <sup>a</sup>  | -82.8  | -84.7  | -73.1  | -60.3  | -64.9  | -79.0  | -62.6  | -62.1  | -62.4  | -74.6  | -74.4  | -74.4  | -74.4  | -74.4  |
| ch4      | -59.7 <sup>a</sup>  | -66.9  | -61.2  | -58.8  | -49.1  | -56.0  | -70.0  | -60.0  | -59.7  | -59.8  | -67.6  | -67.3  | -67.3  | -67.3  | -67.3  |
| h2o      | -91.8 <sup>a</sup>  | -60.0  | -74.6  | -55.6  | -80.3  | -82.5  | -64.7  | -68.2  | -68.1  | -68.1  | -77.4  | -77.3  | -77.3  | -77.3  | -77.3  |
| ch2-trip | -21.0 <sup>a</sup>  | -48.4  | -44.8  | -38.3  | -21.1  | -22.3  | -23.1  | -6.7   | -6.6   | -6.6   | -18.7  | -18.8  | -18.6  | -18.6  | -18.6  |
| t-hcoh   | 26.7 <sup>a</sup>   | -6.7   | 2.4    | 12.8   | 18.3   | 14.6   | -7.8   | 6.1    | 6.4    | 6.3    | -1.5   | -1.3   | -1.1   | -1.1   | -1.1   |
| hooh     | 51.5 <sup>a</sup>   | 85.8   | 71.8   | 69.0   | 54.8   | 51.2   | 56.9   | 50.9   | 51.1   | 51.1   | 43.5   | 43.7   | 43.9   | 43.9   | 43.9   |
| ch2c     | 20.8 <sup>a</sup>   | 16.7   | 8.3    | 20.4   | 29.2   | 21.8   | -10.3  | 1.4    | 1.6    | 1.5    | -1.4   | -1.3   | -1.2   | -1.2   | -1.2   |
| h2co     | -22.6 <sup>a</sup>  | -10.1  | -24.6  | -10.0  | -11.8  | -15.5  | -24.3  | -27.8  | -27.5  | -27.6  | -31.0  | -30.9  | -30.7  | -30.7  | -30.7  |
| oxirene  | 26.3 <sup>a</sup>   | 10.0   | 15.5   | 21.1   | 14.6   | 13.7   | 17.1   | 35.8   | 36.2   | 36.2   | 29.5   | 29.7   | 30.1   | 30.1   | 30.1   |
| formic   | -48.1 <sup>a</sup>  | -10.9  | -34.2  | -13.0  | -48.3  | -42.8  | -27.8  | -26.9  | -26.5  | -26.6  | -31.4  | -31.1  | -30.9  | -30.9  | -30.9  |
| methanol | -17.0 <sup>a</sup>  | 2.2    | -13.6  | 7.8    | -18.5  | -15.2  | -5.3   | -5.7   | -5.3   | -5.3   | -10.7  | -10.5  | -10.2  | -10.2  | -10.2  |
| c2h4     | -39.0 <sup>a</sup>  | -54.3  | -52.4  | -36.3  | -30.7  | -34.9  | -49.3  | -32.1  | -31.7  | -31.8  | -37.0  | -37.0  | -36.9  | -36.9  | -36.9  |
| cf2      | 9.1 <sup>a</sup>    | -41.1  | -34.8  | -6.1   | -8.0   | -20.8  | -24.6  | -11.0  | -10.8  | -10.9  | -16.1  | -16.2  | -16.1  | -16.1  | -16.1  |
| f2o      | 145.5 <sup>a</sup>  | 194.4  | 157.7  | 151.6  | 136.1  | 134.9  | 153.1  | 137.7  | 137.9  | 137.8  | 137.4  | 137.5  | 137.1  | 137.1  | 137.1  |
| ch2-trip | 31.2 <sup>a</sup>   | 0.3    | 3.7    | 13.4   | 17.2   | 20.3   | 19.0   | 33.8   | 33.9   | 33.9   | 24.5   | 24.5   | 24.5   | 24.5   | 24.7   |

. . . continued on next page . . .

Table S19: . . . continued from previous page . . .

| Species  | Ref.                | MNDO   | AM1    | PM3    | PM6    | PM7    | OM1    |        | OM2    |        | OM3    |        | OM3    |        | D3T    |
|----------|---------------------|--------|--------|--------|--------|--------|--------|--------|--------|--------|--------|--------|--------|--------|--------|
|          |                     |        |        |        |        |        | D2     | D3     | D2     | D3     | D2     | D3     | D2     | D3     |        |
| h2o      | -39.7 <sup>a</sup>  | -11.3  | -26.2  | -3.9   | -42.0  | -39.9  | -22.5  | -27.7  | -27.5  | -27.6  | -34.2  | -34.0  | -34.0  | -34.0  | -34.0  |
| ch       | 42.5 <sup>a</sup>   | 28.2   | 33.0   | 57.3   | 56.5   | 48.2   | 35.8   | 50.7   | 50.8   | 50.8   | 43.8   | 43.8   | 43.8   | 43.9   | 43.9   |
| co       | -22.3 <sup>a</sup>  | -42.2  | -34.8  | -32.7  | -13.6  | -23.7  | -46.8  | -29.4  | -29.3  | -29.3  | -31.8  | -31.8  | -31.7  | -31.7  | -31.7  |
| o2       | 88.0 <sup>a</sup>   | 84.2   | 71.7   | 97.3   | 66.8   | 72.8   | 83.8   | 78.6   | 78.7   | 78.7   | 71.4   | 71.5   | 71.5   | 71.5   | 71.5   |
| o        | 78.4 <sup>a</sup>   | 80.5   | 65.0   | 94.6   | 64.7   | 70.2   | 89.7   | 76.0   | 76.0   | 76.0   | 68.6   | 68.6   | 68.5   | 68.5   | 68.5   |
| c        | 107.0 <sup>a</sup>  | 63.7   | 64.8   | 93.5   | 99.9   | 99.2   | 94.4   | 100.5  | 100.5  | 100.5  | 92.1   | 92.1   | 92.1   | 92.1   | 92.1   |
| ch       | 0.7 <sup>a</sup>    | 3.7    | 12.3   | 18.8   | 36.7   | 30.4   | -4.6   | 3.7    | 3.8    | 3.7    | 9.5    | 9.6    | 9.6    | 9.6    | 9.6    |
| c        | -47.1 <sup>a</sup>  | -63.6  | -46.2  | -52.8  | -5.5   | -13.9  | -59.7  | -51.0  | -51.0  | -50.9  | -34.0  | -34.0  | -33.9  | -33.9  | -33.9  |
| hoo      | -95.0 <sup>a</sup>  | -138.9 | -123.4 | -99.7  | -82.3  | -89.7  | -118.6 | -99.2  | -99.0  | -99.1  | -107.0 | -106.9 | -106.9 | -106.9 | -106.9 |
| o2       | -126.1 <sup>a</sup> | -182.2 | -181.4 | -155.7 | -149.0 | -137.7 | -162.8 | -123.8 | -123.7 | -123.7 | -148.3 | -148.3 | -148.2 | -148.2 | -148.2 |
| h2o      | -116.6 <sup>a</sup> | -152.4 | -144.1 | -111.9 | -116.9 | -119.1 | -129.4 | -113.0 | -112.8 | -112.9 | -122.4 | -122.3 | -122.3 | -122.3 | -122.3 |
| oh       | -84.4 <sup>a</sup>  | -115.5 | -115.4 | -94.2  | -81.2  | -88.5  | -101.5 | -80.4  | -80.4  | -80.4  | -92.5  | -92.5  | -92.4  | -92.4  | -92.4  |
| h2       | -29.3 <sup>a</sup>  | -47.8  | -53.6  | -56.6  | -55.8  | -63.9  | -47.1  | -34.2  | -34.1  | -34.2  | -40.2  | -40.1  | -40.2  | -40.2  | -40.2  |
| nh2      | -114.5 <sup>a</sup> | -101.3 | -97.3  | -99.6  | -78.5  | -82.4  | -110.0 | -106.1 | -106.0 | -105.9 | -91.6  | -91.6  | -91.4  | -91.4  | -91.4  |
| c2h4     | -39.8 <sup>a</sup>  | -9.8   | -26.1  | -8.9   | -38.7  | -40.3  | -33.4  | -34.2  | -33.9  | -34.0  | -40.1  | -39.9  | -39.9  | -39.9  | -39.9  |
| c2h6     | -32.9 <sup>a</sup>  | -8.2   | -21.3  | -9.6   | -30.5  | -30.6  | -24.7  | -27.1  | -26.7  | -26.7  | -34.5  | -34.2  | -33.9  | -33.9  | -33.9  |
| ch3f     | -30.4 <sup>a</sup>  | -9.5   | -24.5  | -9.7   | -29.3  | -25.3  | -21.9  | -29.6  | -29.3  | -29.3  | -33.6  | -33.4  | -33.2  | -33.2  | -33.2  |
| ch4      | -37.7 <sup>a</sup>  | -10.5  | -22.5  | -14.7  | -36.9  | -36.3  | -26.0  | -33.5  | -33.2  | -33.2  | -41.0  | -40.8  | -40.5  | -40.5  | -40.5  |
| ch3      | -43.1 <sup>a</sup>  | -26.5  | -35.0  | -20.6  | -43.1  | -43.0  | -30.1  | -35.3  | -35.0  | -35.1  | -40.2  | -40.2  | -39.9  | -39.9  | -39.9  |
| cf2      | -54.0 <sup>a</sup>  | -26.9  | -45.7  | -22.4  | -62.6  | -71.8  | -58.3  | -63.3  | -63.1  | -63.2  | -63.4  | -63.3  | -63.3  | -63.3  | -63.3  |
| ch2-trip | 33.4 <sup>a</sup>   | 37.7   | 29.5   | 40.8   | 15.3   | 19.3   | 37.9   | 35.9   | 36.0   | 36.0   | 26.1   | 26.1   | 26.3   | 26.3   | 26.3   |
| f2       | 38.4 <sup>a</sup>   | 105.8  | 47.5   | 45.0   | 54.9   | 46.2   | 67.8   | 56.9   | 57.0   | 56.9   | 51.0   | 51.0   | 51.0   | 51.0   | 51.0   |
| h2       | -100.1 <sup>a</sup> | -59.4  | -83.5  | -73.9  | -115.1 | -124.1 | -88.7  | -95.6  | -95.6  | -95.7  | -98.8  | -98.7  | -98.9  | -98.9  | -98.9  |
| f        | -48.6 <sup>a</sup>  | -3.0   | -17.0  | -20.0  | -38.2  | -33.5  | -34.1  | -34.9  | -34.9  | -35.0  | -42.5  | -42.5  | -42.7  | -42.7  | -42.7  |
| o        | -31.9 <sup>a</sup>  | -45.9  | -41.5  | -35.5  | -15.7  | -26.2  | -40.9  | -32.0  | -32.0  | -32.0  | -34.6  | -34.6  | -34.7  | -34.7  | -34.7  |
| ch3      | 62.0 <sup>a</sup>   | 62.6   | 59.8   | 45.8   | 62.1   | 52.1   | 67.2   | 64.5   | 64.8   | 64.7   | 63.3   | 63.4   | 63.5   | 63.5   | 63.5   |
| fo2      | -35.4 <sup>a</sup>  | -52.7  | -41.6  | -37.7  | -19.1  | -27.0  | -30.7  | -20.0  | -19.8  | -19.9  | -29.8  | -29.7  | -29.7  | -29.7  | -29.7  |
| f2o      | -62.2 <sup>a</sup>  | -106.4 | -88.7  | -81.5  | -63.4  | -65.6  | -76.5  | -63.6  | -63.4  | -63.5  | -74.3  | -74.1  | -74.1  | -74.1  | -74.1  |
| of       | -39.2 <sup>a</sup>  | -81.8  | -63.7  | -54.9  | -29.7  | -34.1  | -51.5  | -48.6  | -48.5  | -48.6  | -51.9  | -51.9  | -51.8  | -51.8  | -51.8  |
| of       | -12.4 <sup>a</sup>  | -28.1  | -16.5  | -11.1  | 14.6   | 4.6    | -5.7   | -5.0   | -4.9   | -5.0   | -7.5   | -7.4   | -7.4   | -7.4   | -7.4   |
| f2       | -66.1 <sup>a</sup>  | -83.7  | -103.5 | -77.2  | -73.5  | -83.4  | -68.9  | -59.9  | -59.7  | -59.8  | -68.2  | -68.1  | -68.1  | -68.1  | -68.1  |
| hf       | -103.8 <sup>a</sup> | -123.3 | -116.8 | -95.7  | -113.7 | -108.7 | -119.5 | -100.1 | -100.0 | -100.1 | -110.9 | -110.9 | -110.9 | -110.9 | -110.9 |
| f        | -67.8 <sup>a</sup>  | -83.7  | -77.1  | -65.1  | -89.6  | -78.8  | -82.2  | -67.7  | -67.7  | -67.7  | -74.6  | -74.6  | -74.7  | -74.7  | -74.7  |
| no       | -45.7 <sup>a</sup>  | -60.9  | -53.1  | -45.6  | -34.5  | -37.6  | -52.5  | -38.4  | -38.3  | -38.3  | -48.4  | -48.4  | -48.2  | -48.2  | -48.2  |
| hno      | -14.1 <sup>a</sup>  | -24.8  | -27.5  | -29.8  | -21.4  | -19.7  | -27.7  | -19.5  | -19.3  | -19.3  | -29.1  | -29.0  | -28.9  | -28.9  | -28.9  |
| hoo      | -15.6 <sup>a</sup>  | -19.8  | -15.5  | -28.9  | -3.1   | -7.4   | -24.7  | -20.8  | -20.7  | -20.6  | -20.1  | -20.0  | -19.8  | -19.8  | -19.8  |
| hco      | 2.6 <sup>a</sup>    | -44.7  | -40.8  | -37.6  | -11.3  | -13.9  | -39.4  | -29.2  | -29.0  | -28.9  | -33.2  | -33.2  | -32.9  | -32.9  | -32.9  |
| hno      | -30.9 <sup>a</sup>  | -46.8  | -43.2  | -48.1  | -23.9  | -35.4  | -62.5  | -52.5  | -52.3  | -52.3  | -54.5  | -54.4  | -54.2  | -54.2  | -54.2  |
| hcn      | 0.5 <sup>a</sup>    | -21.1  | -24.5  | -15.3  | -16.6  | -12.7  | -22.6  | -25.6  | -25.4  | -25.4  | -21.8  | -21.8  | -21.5  | -21.5  | -21.5  |
| oh       | -54.1 <sup>a</sup>  | -64.6  | -61.9  | -57.9  | -47.2  | -50.0  | -57.5  | -49.8  | -49.8  | -49.7  | -48.9  | -48.9  | -48.7  | -48.7  | -48.7  |
| n        | 31.9 <sup>a</sup>   | 45.9   | 41.5   | 35.5   | 15.7   | 26.2   | 40.9   | 32.0   | 32.0   | 32.0   | 34.6   | 34.6   | 34.7   | 34.7   | 34.7   |
| c2h2     | -70.3 <sup>a</sup>  | -67.7  | -80.1  | -64.9  | -65.3  | -57.3  | -72.8  | -67.2  | -67.0  | -67.0  | -72.5  | -72.3  | -72.2  | -72.2  | -72.2  |
| c2h4     | -33.4 <sup>a</sup>  | -36.9  | -43.2  | -37.6  | -44.6  | -38.7  | -38.1  | -30.6  | -30.2  | -30.4  | -40.0  | -39.7  | -39.7  | -39.7  | -39.7  |
| ch4      | -27.7 <sup>a</sup>  | -21.0  | -19.8  | -23.3  | -33.4  | -29.8  | -29.0  | -27.7  | -27.8  | -27.8  | -33.0  | -32.7  | -32.6  | -32.6  | -32.6  |
| h2o      | -170.2 <sup>a</sup> | -140.5 | -139.6 | -150.2 | -145.0 | -152.7 | -154.4 | -144.2 | -144.1 | -144.1 | -146.0 | -145.9 | -145.8 | -145.8 | -145.8 |

. . . continued on next page . . .

Table S19: . . . continued from previous page . . .

| Species  | Ref.                | MNDO   | AM1    | PM3    | PM6    | PM7    | OM1    |        | OM2    |        | OM3    |        | OM3    |        | D3T |
|----------|---------------------|--------|--------|--------|--------|--------|--------|--------|--------|--------|--------|--------|--------|--------|-----|
|          |                     |        |        |        |        |        | D2     | D3     | D2     | D3     | D2     | D3     | D2     | D3     |     |
| ch2-trip | 10.9 <sup>a</sup>   | -2.4   | -3.3   | -2.8   | -5.3   | 3.9    | 17.8   | 25.3   | 25.4   | 15.9   | 15.8   | 16.1   | 16.1   | 16.1   |     |
| t-hcoh   | 58.6 <sup>a</sup>   | 39.2   | 43.9   | 48.3   | 34.0   | 40.8   | 33.1   | 38.1   | 38.3   | 33.2   | 33.3   | 33.6   | 33.6   | 33.6   |     |
| hooh     | -26.9 <sup>a</sup>  | 5.2    | 6.8    | -25.6  | -9.8   | -19.0  | -32.8  | -25.1  | -24.9  | -25.1  | -25.0  | -24.6  | -24.6  | -24.6  |     |
| ch2c     | 52.7 <sup>a</sup>   | 62.6   | 49.8   | 49.8   | 44.9   | 48.0   | 30.6   | 33.4   | 33.6   | 33.6   | 33.3   | 33.4   | 33.4   | 33.4   |     |
| h2co     | -100.9 <sup>a</sup> | -90.6  | -89.6  | -104.6 | -76.5  | -85.7  | -114.0 | -103.8 | -103.5 | -99.6  | -99.5  | -99.2  | -99.2  | -99.2  |     |
| oxirene  | 58.2 <sup>a</sup>   | 56.0   | 57.0   | 56.5   | 30.4   | 39.9   | 58.0   | 67.8   | 68.2   | 64.1   | 64.3   | 64.7   | 64.7   | 64.7   |     |
| formic   | -126.5 <sup>a</sup> | -91.4  | -99.2  | -107.6 | -112.9 | -113.0 | -117.5 | -102.9 | -102.6 | -100.0 | -99.7  | -99.4  | -99.4  | -99.4  |     |
| methanol | -95.4 <sup>a</sup>  | -78.4  | -78.7  | -86.8  | -83.2  | -85.5  | -95.0  | -81.7  | -81.3  | -79.3  | -79.1  | -78.7  | -78.7  | -78.7  |     |
| c2h4     | -7.1 <sup>a</sup>   | -8.4   | -10.9  | -0.8   | -15.0  | -8.7   | -8.3   | -0.1   | 0.3    | 0.2    | -2.4   | -2.3   | -2.3   | -2.3   |     |
| cf2      | 41.0 <sup>a</sup>   | 4.9    | 6.7    | 29.4   | 7.7    | 5.4    | 16.3   | 20.9   | 21.2   | 18.3   | 18.4   | 18.6   | 18.6   | 18.6   |     |
| f2o      | 67.1 <sup>a</sup>   | 113.9  | 92.7   | 57.0   | 71.4   | 64.7   | 63.4   | 61.7   | 61.9   | 68.8   | 68.9   | 69.1   | 69.1   | 69.1   |     |
| hco      | 71.2 <sup>a</sup>   | 67.3   | 60.1   | 42.0   | 64.0   | 59.4   | 56.4   | 54.7   | 54.9   | 54.4   | 54.5   | 54.6   | 54.6   | 54.6   |     |
| ch2-trip | 63.1 <sup>a</sup>   | 46.2   | 45.2   | 48.9   | 33.0   | 46.5   | 59.9   | 65.8   | 65.9   | 59.1   | 59.2   | 59.4   | 59.4   | 59.4   |     |
| h2o      | -118.0 <sup>a</sup> | -91.8  | -91.2  | -98.5  | -106.7 | -110.1 | -112.3 | -103.7 | -103.5 | -102.8 | -102.6 | -102.5 | -102.5 | -102.5 |     |
| ch       | 74.4 <sup>a</sup>   | 74.1   | 74.5   | 92.8   | 72.2   | 74.4   | 76.7   | 82.7   | 82.8   | 78.4   | 78.4   | 78.5   | 78.5   | 78.5   |     |
| co       | 9.6 <sup>a</sup>    | 3.7    | 6.7    | 2.7    | 2.2    | 2.5    | -5.9   | 2.6    | 2.7    | 2.8    | 2.8    | 3.0    | 3.0    | 3.0    |     |
| c        | 138.9 <sup>a</sup>  | 109.7  | 106.3  | 129.0  | 115.7  | 125.4  | 135.4  | 132.5  | 132.5  | 126.7  | 126.7  | 126.8  | 126.8  | 126.8  |     |
| ch       | 76.5 <sup>a</sup>   | 50.5   | 58.3   | 77.5   | 64.7   | 73.2   | 59.8   | 79.1   | 79.2   | 67.0   | 67.1   | 67.1   | 67.1   | 67.1   |     |
| n        | -78.4 <sup>a</sup>  | -80.5  | -65.0  | -94.6  | -64.7  | -70.2  | -89.7  | -76.0  | -76.0  | -68.6  | -68.6  | -68.5  | -68.5  | -68.5  |     |
| c        | 28.6 <sup>a</sup>   | -16.8  | -0.2   | -1.1   | 35.3   | 29.0   | 4.7    | 24.5   | 24.5   | 23.5   | 23.5   | 23.6   | 23.6   | 23.6   |     |
| hoo      | -63.1 <sup>a</sup>  | -93.0  | -81.9  | -64.2  | -66.6  | -63.5  | -77.7  | -67.2  | -67.0  | -72.4  | -72.3  | -72.2  | -72.2  | -72.2  |     |
| o2       | -94.2 <sup>a</sup>  | -136.2 | -139.9 | -120.2 | -133.2 | -111.5 | -121.9 | -91.8  | -91.7  | -113.7 | -113.7 | -113.5 | -113.5 | -113.5 |     |
| h2o      | -84.7 <sup>a</sup>  | -106.5 | -102.6 | -76.4  | -101.2 | -92.9  | -88.5  | -81.0  | -80.9  | -87.8  | -87.6  | -87.6  | -87.6  | -87.6  |     |
| oh       | -52.5 <sup>a</sup>  | -69.6  | -73.9  | -58.7  | -65.5  | -62.3  | -60.5  | -48.5  | -48.4  | -57.9  | -57.8  | -57.8  | -57.8  | -57.8  |     |
| h2       | 2.7 <sup>a</sup>    | -1.9   | -12.1  | -21.1  | -40.1  | -37.7  | -6.2   | -2.2   | -2.1   | -5.5   | -5.5   | -5.5   | -5.5   | -5.5   |     |
| nh2      | -38.8 <sup>a</sup>  | -54.4  | -51.3  | -47.9  | -37.7  | -39.6  | -45.6  | -30.6  | -30.5  | -34.2  | -34.1  | -33.9  | -33.9  | -33.9  |     |
| c2h4     | -118.2 <sup>a</sup> | -90.3  | -91.2  | -103.5 | -103.3 | -110.5 | -123.2 | -110.2 | -109.9 | -108.8 | -108.7 | -108.5 | -108.5 | -108.5 |     |
| c2h6     | -111.2 <sup>a</sup> | -88.7  | -86.3  | -104.1 | -95.1  | -100.8 | -114.4 | -103.1 | -102.7 | -103.1 | -102.8 | -102.4 | -102.4 | -102.4 |     |
| ch2ch    | 74.7 <sup>a</sup>   | 79.7   | 70.3   | 56.7   | 75.9   | 69.8   | 75.4   | 70.2   | 70.4   | 69.8   | 70.1   | 70.2   | 70.2   | 70.2   |     |
| ch3f     | -108.8 <sup>a</sup> | -90.0  | -89.6  | -104.3 | -94.0  | -95.6  | -111.6 | -105.6 | -105.3 | -102.3 | -102.1 | -101.7 | -101.7 | -101.7 |     |
| ch4      | -116.0 <sup>a</sup> | -91.0  | -87.5  | -109.3 | -101.6 | -106.6 | -115.7 | -109.6 | -109.2 | -109.6 | -109.4 | -109.0 | -109.0 | -109.0 |     |
| ch3      | -121.5 <sup>a</sup> | -107.1 | -100.1 | -115.2 | -107.8 | -113.2 | -119.8 | -111.3 | -111.1 | -108.8 | -108.8 | -108.4 | -108.4 | -108.4 |     |
| cf2      | -132.4 <sup>a</sup> | -107.4 | -110.8 | -117.0 | -127.2 | -142.0 | -148.0 | -139.3 | -139.1 | -132.0 | -131.9 | -131.8 | -131.8 | -131.8 |     |
| cch      | 79.2 <sup>a</sup>   | 131.2  | 119.7  | 107.1  | 93.4   | 88.9   | 96.8   | 82.4   | 82.6   | 84.0   | 84.1   | 84.2   | 84.2   | 84.2   |     |
| ch2-trip | -45.0 <sup>a</sup>  | -42.8  | -35.5  | -53.8  | -49.4  | -50.9  | -51.8  | -40.2  | -40.0  | -42.5  | -42.5  | -42.3  | -42.3  | -42.3  |     |
| f2       | -40.0 <sup>a</sup>  | 25.3   | -17.5  | -49.6  | -9.7   | -24.1  | -21.9  | -19.1  | -19.0  | -17.7  | -17.6  | -17.6  | -17.6  | -17.6  |     |
| cf       | 178.5 <sup>a</sup>  | 80.8   | 74.4   | 66.0   | 91.7   | 88.9   | 83.0   | 78.9   | 79.1   | 79.6   | 79.7   | 79.7   | 79.7   | 79.7   |     |
| h2       | -173.0 <sup>a</sup> | -139.9 | -148.5 | -168.5 | -179.8 | -194.3 | -178.4 | -171.7 | -171.6 | -167.5 | -167.3 | -167.4 | -167.4 | -167.4 |     |
| c        | 79.7 <sup>a</sup>   | 109.8  | 101.4  | 79.5   | 102.3  | 100.5  | 93.7   | 89.3   | 89.3   | 90.1   | 90.1   | 90.2   | 90.2   | 90.2   |     |
| f        | -127.0 <sup>a</sup> | -83.6  | -82.0  | -114.6 | -102.9 | -103.8 | -123.9 | -110.9 | -110.9 | -111.2 | -111.2 | -111.2 | -111.2 | -111.2 |     |
| f        | -14.0 <sup>a</sup>  | -28.1  | 9.9    | 1.0    | -1.5   | 9.2    | -19.0  | -12.9  | -12.9  | -13.9  | -13.9  | -14.0  | -14.0  | -14.0  |     |
| n        | 75.7 <sup>a</sup>   | 46.8   | 46.0   | 51.7   | 40.8   | 42.8   | 64.4   | 75.5   | 75.5   | 57.4   | 57.4   | 57.5   | 57.5   | 57.5   |     |
| ch3      | 76.0 <sup>a</sup>   | 90.7   | 49.9   | 44.8   | 63.6   | 43.0   | 86.2   | 77.4   | 77.6   | 77.2   | 77.3   | 77.5   | 77.5   | 77.5   |     |
| fo2      | -21.4 <sup>a</sup>  | -24.7  | -51.4  | -38.7  | -17.6  | -36.1  | -11.6  | -7.1   | -6.9   | -15.9  | -15.7  | -15.7  | -15.7  | -15.7  |     |
| f2o      | 5.5 <sup>a</sup>    | -22.7  | -11.6  | -16.4  | 26.2   | 13.2   | 5.8    | 4.1    | 4.3    | 0.4    | 0.5    | 0.6    | 0.6    | 0.6    |     |

. . . continued on next page . . .



Table S19: . . . continued from previous page . . .

| Species  | Ref.               | MNDO  | AM1   | PM3   | PM6   | PM7   | OM1   |       | OM2   |       | OM3   |       | OM3   |       | OM3   |       |
|----------|--------------------|-------|-------|-------|-------|-------|-------|-------|-------|-------|-------|-------|-------|-------|-------|-------|
|          |                    |       |       |       |       |       | D2    | D3    |
| of       | 28.6 <sup>a</sup>  | 1.9   | 13.5  | 10.3  | 59.8  | 44.7  | 30.7  | 19.1  | 19.2  | 19.2  | 19.2  | 22.7  | 22.8  | 22.9  | 22.9  | 22.9  |
| o2       | -25.1 <sup>a</sup> | -53.7 | -73.6 | -55.9 | -28.2 | -43.2 | -32.5 | -35.7 | -35.6 | -35.6 | -35.6 | -38.0 | -37.9 | -37.8 | -37.8 | -37.8 |
| of       | 1.7 <sup>a</sup>   | -0.0  | -26.4 | -12.0 | 16.1  | -4.6  | 13.3  | 7.9   | 8.0   | 7.9   | 7.9   | 6.4   | 6.5   | 6.6   | 6.6   | 6.6   |
| hf       | -36.1 <sup>a</sup> | -39.7 | -39.7 | -30.5 | -24.1 | -30.0 | -37.3 | -32.4 | -32.3 | -32.3 | -32.3 | -36.3 | -36.3 | -36.2 | -36.2 | -36.2 |
| o        | 14.0 <sup>a</sup>  | 28.1  | -9.9  | -1.0  | 1.5   | -9.2  | 19.0  | 12.9  | 12.9  | 12.9  | 12.9  | 13.9  | 13.9  | 14.0  | 14.0  | 14.0  |
| no       | 22.8               | 22.8  | 24.0  | 19.6  | 55.1  | 41.2  | 29.7  | 29.3  | 29.4  | 29.4  | 29.4  | 26.2  | 26.3  | 26.5  | 26.5  | 26.5  |
| n2       | -10.7 <sup>a</sup> | -4.5  | -8.0  | -4.5  | 33.8  | 20.8  | -8.0  | -11.6 | -11.5 | -11.4 | -11.4 | -12.0 | -11.9 | -11.7 | -11.7 | -11.7 |
| hno      | 53.7 <sup>a</sup>  | 58.8  | 49.6  | 35.3  | 68.1  | 59.1  | 54.5  | 48.2  | 48.4  | 48.4  | 48.4  | 45.5  | 45.6  | 45.8  | 45.8  | 45.8  |
| hno      | 96.1 <sup>a</sup>  | 36.7  | 38.8  | 66.5  | 79.0  | 68.4  | 61.4  | 58.5  | 58.6  | 58.7  | 58.7  | 56.6  | 56.7  | 57.0  | 57.0  | 57.0  |
| hcn      | 68.2 <sup>a</sup>  | 62.6  | 52.6  | 49.9  | 72.9  | 66.1  | 59.7  | 42.1  | 42.3  | 42.3  | 42.3  | 52.8  | 52.8  | 53.1  | 53.1  | 53.1  |
| n        | 99.7 <sup>a</sup>  | 129.6 | 118.6 | 100.6 | 105.3 | 105.0 | 123.2 | 99.7  | 99.7  | 99.7  | 99.7  | 109.2 | 109.2 | 109.3 | 109.3 | 109.3 |
| c2h2     | -2.5 <sup>a</sup>  | 15.9  | -2.9  | 0.3   | 24.3  | 21.5  | 9.4   | 0.5   | 0.8   | 0.7   | 0.7   | 2.1   | 2.4   | 2.5   | 2.5   | 2.5   |
| c2h4     | 34.4 <sup>a</sup>  | 46.8  | 33.9  | 27.5  | 45.0  | 40.1  | 44.1  | 37.1  | 37.5  | 37.3  | 37.3  | 34.6  | 34.9  | 34.9  | 34.9  | 34.9  |
| ch4      | 40.0 <sup>a</sup>  | 62.7  | 57.4  | 41.8  | 56.1  | 49.0  | 53.2  | 39.7  | 40.0  | 40.0  | 40.0  | 41.7  | 41.9  | 42.1  | 42.1  | 42.1  |
| h2o      | -43.2 <sup>a</sup> | -56.9 | -57.6 | -35.6 | -42.1 | -49.0 | -30.5 | -33.3 | -33.1 | -33.1 | -33.1 | -34.9 | -34.8 | -34.6 | -34.6 | -34.6 |
| ch2-trip | 78.7 <sup>a</sup>  | 81.2  | 73.8  | 62.3  | 84.2  | 82.7  | 100.0 | 93.0  | 93.1  | 93.1  | 93.1  | 90.5  | 90.5  | 90.8  | 90.8  | 90.8  |
| t-hcoH   | 126.3 <sup>a</sup> | 122.9 | 121.0 | 113.4 | 123.6 | 119.6 | 115.3 | 105.8 | 106.1 | 106.0 | 106.0 | 107.8 | 108.0 | 108.2 | 108.2 | 108.2 |
| hooh     | 100.1 <sup>a</sup> | 88.8  | 88.8  | 89.0  | 93.1  | 84.8  | 91.1  | 85.8  | 86.1  | 86.1  | 86.1  | 86.1  | 86.2  | 86.6  | 86.6  | 86.6  |
| ch2c     | 120.5 <sup>a</sup> | 146.3 | 126.9 | 121.0 | 134.5 | 126.8 | 112.9 | 101.1 | 101.3 | 101.3 | 101.3 | 107.8 | 107.9 | 108.1 | 108.1 | 108.1 |
| h2co     | 26.1 <sup>a</sup>  | -7.0  | -7.6  | 10.0  | 26.4  | 18.1  | 9.8   | 7.2   | 7.4   | 7.5   | 7.5   | 11.6  | 11.7  | 12.0  | 12.0  | 12.0  |
| oxirene  | 126.0 <sup>a</sup> | 139.6 | 134.1 | 121.7 | 119.9 | 118.7 | 140.3 | 135.5 | 135.9 | 135.9 | 135.9 | 138.7 | 138.9 | 139.4 | 139.4 | 139.4 |
| formic   | 0.5 <sup>a</sup>   | -7.8  | -17.2 | 7.0   | -10.0 | -9.2  | 6.3   | 8.0   | 8.4   | 8.4   | 8.4   | 11.2  | 11.5  | 11.8  | 11.8  | 11.8  |
| methanol | 31.6 <sup>a</sup>  | 5.2   | 3.3   | 27.8  | 19.7  | 18.3  | 28.8  | 29.2  | 29.7  | 29.7  | 29.7  | 31.8  | 32.0  | 32.5  | 32.5  | 32.5  |
| c2h4     | 60.7 <sup>a</sup>  | 75.3  | 66.2  | 64.3  | 74.6  | 70.1  | 73.9  | 67.6  | 68.0  | 67.9  | 67.9  | 71.9  | 72.2  | 72.4  | 72.4  | 72.4  |
| cf2      | 108.8 <sup>a</sup> | 88.5  | 83.8  | 94.6  | 97.2  | 84.2  | 98.6  | 88.6  | 88.9  | 88.9  | 88.9  | 92.9  | 93.0  | 93.3  | 93.3  | 93.3  |
| f2o      | 194.1 <sup>a</sup> | 197.4 | 174.7 | 171.6 | 174.3 | 168.5 | 187.3 | 172.6 | 172.8 | 172.9 | 172.9 | 180.0 | 180.0 | 180.4 | 180.4 | 180.4 |
| hco      | 85.3 <sup>a</sup>  | 95.4  | 50.2  | 41.0  | 65.5  | 50.3  | 75.5  | 67.6  | 67.8  | 67.8  | 67.8  | 68.3  | 68.4  | 68.6  | 68.6  | 68.6  |
| ch2-trip | 130.8 <sup>a</sup> | 129.9 | 122.3 | 114.0 | 122.5 | 125.3 | 142.2 | 133.5 | 133.6 | 133.7 | 133.7 | 133.7 | 133.8 | 134.0 | 134.0 | 134.0 |
| h2o      | 9.0 <sup>a</sup>   | -8.2  | -9.2  | 16.1  | -3.8  | -6.3  | 11.6  | 7.2   | 7.4   | 7.4   | 7.4   | 8.4   | 8.5   | 8.7   | 8.7   | 8.7   |
| ch       | 142.1 <sup>a</sup> | 157.8 | 151.7 | 158.0 | 161.8 | 153.2 | 158.9 | 150.4 | 150.5 | 150.5 | 150.5 | 153.0 | 153.1 | 153.2 | 153.2 | 153.2 |
| co       | 77.3 <sup>a</sup>  | 87.4  | 83.8  | 67.9  | 91.7  | 81.3  | 76.3  | 70.3  | 70.4  | 70.4  | 70.4  | 77.4  | 77.5  | 77.7  | 77.7  | 77.7  |
| o2       | 136.6 <sup>a</sup> | 87.3  | 88.7  | 117.3 | 105.1 | 106.3 | 118.0 | 113.5 | 113.6 | 113.7 | 113.7 | 114.0 | 114.0 | 114.2 | 114.2 | 114.2 |
| o        | 127.0 <sup>a</sup> | 83.6  | 82.0  | 114.6 | 102.9 | 103.8 | 123.9 | 110.9 | 110.9 | 111.0 | 111.0 | 111.2 | 111.2 | 111.2 | 111.2 | 111.2 |
| c        | 206.7 <sup>a</sup> | 193.4 | 183.4 | 194.1 | 205.2 | 204.2 | 217.6 | 200.2 | 200.2 | 200.3 | 200.3 | 201.3 | 201.3 | 201.4 | 201.4 | 201.4 |
| n        | 48.6 <sup>a</sup>  | 3.0   | 17.0  | 20.0  | 38.2  | 33.5  | 34.1  | 34.9  | 34.9  | 35.0  | 35.0  | 42.5  | 42.5  | 42.7  | 42.7  | 42.7  |
| hoo      | 4.7 <sup>a</sup>   | -9.3  | -4.8  | 0.9   | 23.0  | 15.3  | 4.6   | 0.5   | 0.7   | 0.7   | 0.7   | 2.2   | 2.3   | 2.4   | 2.4   | 2.4   |
| o2       | -26.5 <sup>a</sup> | -52.6 | -62.8 | -55.1 | -43.7 | -32.7 | -39.6 | -24.1 | -24.0 | -24.0 | -24.0 | -39.1 | -39.0 | -38.9 | -38.9 | -38.9 |
| h2o      | -17.0 <sup>a</sup> | -22.8 | -25.4 | -11.2 | -11.6 | -14.1 | -6.3  | -13.3 | -13.1 | -13.2 | -13.2 | -13.1 | -13.0 | -12.9 | -12.9 | -12.9 |
| h2       | 70.4 <sup>a</sup>  | 81.8  | 65.0  | 44.0  | 49.4  | 41.1  | 76.0  | 65.5  | 65.6  | 65.6  | 65.6  | 69.1  | 69.1  | 69.2  | 69.2  | 69.2  |
| c2h4     | 8.8 <sup>a</sup>   | -6.7  | -9.2  | 11.1  | -0.4  | -6.8  | 0.7   | 0.7   | 1.0   | 1.0   | 1.0   | 2.4   | 2.5   | 2.8   | 2.8   | 2.8   |
| c2h6     | 15.8 <sup>a</sup>  | -5.1  | -4.3  | 10.5  | 7.8   | 3.0   | 9.5   | 7.8   | 8.2   | 8.3   | 8.3   | 8.1   | 8.3   | 8.8   | 8.8   | 8.8   |
| ch2ch    | 88.8 <sup>a</sup>  | 107.8 | 60.4  | 55.8  | 77.4  | 60.6  | 94.4  | 83.1  | 83.4  | 83.3  | 83.3  | 83.8  | 84.1  | 84.2  | 84.2  | 84.2  |
| ch3f     | 18.2 <sup>a</sup>  | -6.4  | -7.6  | 10.3  | 8.9   | 8.2   | 12.2  | 5.3   | 5.6   | 5.7   | 5.7   | 8.9   | 9.1   | 9.5   | 9.5   | 9.5   |
| ch4      | 11.0 <sup>a</sup>  | -7.4  | -5.5  | 5.3   | 1.3   | -2.8  | 8.2   | 1.4   | 1.7   | 1.8   | 1.8   | 1.6   | 1.8   | 2.2   | 2.2   | 2.2   |
| ch3      | 5.5 <sup>a</sup>   | -23.5 | -18.1 | -0.6  | -4.9  | -9.5  | 4.1   | -0.3  | -0.1  | -0.0  | -0.0  | 2.4   | 2.4   | 2.8   | 2.8   | 2.8   |

. . . continued on next page . . .

Table S19: . . . continued from previous page . . .

| Species  | Ref.               | MNDO  | AMI   | PM3   | PM6   | PM7   | OM1   |       | OM2   |       | OM3   |       | OM3   |       | D3T |
|----------|--------------------|-------|-------|-------|-------|-------|-------|-------|-------|-------|-------|-------|-------|-------|-----|
|          |                    |       |       |       |       |       | D2    | D3    | D2    | D3    | D2    | D3    | D2    | D3    |     |
| cf2      | -5.4 <sup>a</sup>  | -23.9 | -28.8 | -2.4  | -24.3 | -38.3 | -24.2 | -28.4 | -28.1 | -28.2 | -20.9 | -20.7 | -20.6 | -20.6 |     |
| ceh      | 93.3 <sup>a</sup>  | 159.3 | 109.8 | 106.2 | 94.9  | 79.7  | 115.8 | 95.3  | 95.5  | 95.4  | 98.0  | 98.1  | 98.2  | 98.2  |     |
| ch2-trip | 82.1 <sup>a</sup>  | 40.7  | 46.5  | 60.8  | 53.5  | 52.9  | 72.0  | 70.8  | 71.0  | 71.0  | 68.6  | 68.6  | 68.9  | 68.9  |     |
| cf       | 87.0 <sup>a</sup>  | 108.9 | 64.5  | 65.0  | 93.2  | 79.7  | 102.0 | 91.8  | 91.9  | 91.9  | 93.5  | 93.5  | 93.7  | 93.7  |     |
| h2       | -51.5 <sup>a</sup> | -56.4 | -66.5 | -53.9 | -76.9 | -90.6 | -54.5 | -60.7 | -60.6 | -60.6 | -56.3 | -56.2 | -56.2 | -56.2 |     |
| c        | 93.7 <sup>a</sup>  | 137.9 | 91.5  | 78.5  | 103.8 | 91.3  | 112.8 | 102.1 | 102.2 | 102.2 | 104.1 | 104.1 | 104.2 | 104.2 |     |
| o        | 67.8 <sup>a</sup>  | 83.7  | 77.1  | 65.1  | 89.6  | 78.8  | 82.2  | 67.7  | 67.7  | 67.7  | 74.6  | 74.6  | 74.7  | 74.7  |     |
| ch3      | 63.6 <sup>a</sup>  | 83.5  | 70.0  | 51.0  | 50.7  | 53.2  | 72.6  | 70.5  | 70.7  | 70.6  | 70.9  | 70.9  | 71.0  | 71.0  |     |
| fo2      | -33.8 <sup>a</sup> | -31.9 | -31.4 | -32.5 | -30.5 | -25.9 | -25.3 | -14.1 | -13.9 | -14.0 | -22.3 | -22.1 | -22.2 | -22.2 |     |
| f2o      | -9.7 <sup>a</sup>  | -36.8 | -14.8 | -22.8 | 2.1   | -3.3  | -15.9 | -15.2 | -15.0 | -15.1 | -16.4 | -16.2 | -16.3 | -16.3 |     |
| of       | 13.3 <sup>a</sup>  | -12.2 | 10.2  | 3.8   | 35.8  | 28.3  | 9.0   | -0.2  | -0.1  | -0.1  | 5.9   | 6.0   | 6.0   | 6.0   |     |
| o2       | -37.5 <sup>a</sup> | -60.9 | -53.5 | -49.7 | -41.1 | -33.0 | -46.2 | -42.7 | -42.6 | -42.7 | -44.4 | -44.3 | -44.3 | -44.3 |     |
| of       | -10.7 <sup>a</sup> | -7.3  | -6.3  | -5.8  | 3.1   | 5.7   | -0.4  | 0.9   | 1.0   | 0.9   | 0.1   | 0.1   | 0.1   | 0.1   |     |
| f2       | -13.6 <sup>a</sup> | -14.1 | -29.6 | -18.5 | -8.0  | -21.0 | -8.4  | -11.4 | -11.3 | -11.4 | -10.3 | -10.3 | -10.3 | -10.3 |     |
| hf       | -51.3 <sup>a</sup> | -53.7 | -42.9 | -37.0 | -48.2 | -46.4 | -59.0 | -51.6 | -51.6 | -51.6 | -53.0 | -53.0 | -53.1 | -53.1 |     |
| o        | 1.6 <sup>a</sup>   | 20.9  | 10.2  | 5.2   | -11.4 | 1.1   | 5.4   | 5.9   | 5.9   | 5.9   | 7.6   | 7.5   | 7.5   | 7.5   |     |
| f        | -15.2 <sup>a</sup> | -14.1 | -3.2  | -6.4  | -24.1 | -16.5 | -21.7 | -19.2 | -19.3 | -19.3 | -16.8 | -16.8 | -16.9 | -16.9 |     |
| no       | 6.8 <sup>a</sup>   | 8.7   | 20.8  | 13.1  | 31.0  | 24.7  | 8.1   | 10.1  | 10.1  | 10.1  | 9.5   | 9.5   | 9.6   | 9.6   |     |
| o2       | 8.4 <sup>a</sup>   | 3.8   | 8.8   | 12.3  | 12.7  | 12.4  | 5.0   | 11.4  | 11.4  | 11.4  | 0.5   | 0.5   | 0.6   | 0.6   |     |
| n2       | -26.0 <sup>a</sup> | -18.5 | -11.3 | -10.9 | 9.7   | 4.4   | -29.7 | -30.8 | -30.8 | -30.7 | -28.7 | -28.7 | -28.6 | -28.6 |     |
| no       | 19.4 <sup>a</sup>  | -22.6 | -18.8 | 4.5   | 16.5  | 8.7   | -9.2  | 14.0  | 14.1  | 14.1  | -14.9 | -14.8 | -14.7 | -14.7 |     |
| hno      | 38.4 <sup>a</sup>  | 44.8  | 46.4  | 28.9  | 44.1  | 42.6  | 32.8  | 29.0  | 29.1  | 29.1  | 28.8  | 28.8  | 28.9  | 28.9  |     |
| hno      | 56.0 <sup>a</sup>  | 19.9  | 21.2  | 20.3  | 35.9  | 36.1  | 18.1  | 20.7  | 20.8  | 20.8  | 15.6  | 15.7  | 15.8  | 15.8  |     |
| hcn      | 53.0 <sup>a</sup>  | 48.5  | 49.4  | 43.4  | 48.8  | 49.6  | 38.0  | 22.9  | 23.0  | 23.0  | 36.0  | 36.0  | 36.2  | 36.2  |     |
| o        | 54.1 <sup>a</sup>  | 64.6  | 61.9  | 57.9  | 47.2  | 50.0  | 57.5  | 49.8  | 49.8  | 49.7  | 48.9  | 48.9  | 48.7  | 48.7  |     |
| n        | 84.4 <sup>a</sup>  | 115.5 | 115.4 | 94.2  | 81.2  | 88.5  | 101.5 | 80.4  | 80.4  | 80.4  | 92.5  | 92.5  | 92.4  | 92.4  |     |
| c2h2     | -17.8 <sup>a</sup> | 1.9   | -6.1  | -6.1  | 0.2   | 5.0   | -12.3 | -18.8 | -18.5 | -18.6 | -14.7 | -14.4 | -14.4 | -14.4 |     |
| c2h4     | 19.1 <sup>a</sup>  | 32.7  | 30.7  | 21.1  | 20.9  | 23.6  | 22.4  | 17.9  | 18.3  | 18.0  | 17.8  | 18.1  | 18.0  | 18.0  |     |
| ch4      | 24.8 <sup>a</sup>  | 48.6  | 54.1  | 35.4  | 32.1  | 32.5  | 31.5  | 20.5  | 20.7  | 20.7  | 24.9  | 25.2  | 25.2  | 25.2  |     |
| h2o      | -82.7 <sup>a</sup> | -73.7 | -75.2 | -81.9 | -85.3 | -81.2 | -73.9 | -71.1 | -71.0 | -71.0 | -75.9 | -75.8 | -75.8 | -75.8 |     |
| ch2-trip | 63.4 <sup>a</sup>  | 67.2  | 70.6  | 55.9  | 60.2  | 66.2  | 78.3  | 73.7  | 73.8  | 73.8  | 73.8  | 73.7  | 73.9  | 73.9  |     |
| t-hcooh  | 111.1 <sup>a</sup> | 108.8 | 117.8 | 107.0 | 99.5  | 103.2 | 93.7  | 86.5  | 86.8  | 86.7  | 91.0  | 91.2  | 91.3  | 91.3  |     |
| hooh     | 60.6 <sup>a</sup>  | 72.0  | 71.2  | 42.8  | 49.9  | 52.5  | 47.7  | 48.0  | 48.2  | 48.2  | 45.1  | 45.1  | 45.4  | 45.4  |     |
| ch2c     | 105.2 <sup>a</sup> | 132.2 | 123.7 | 114.6 | 110.4 | 110.3 | 91.2  | 81.9  | 82.0  | 82.0  | 91.0  | 91.2  | 91.2  | 91.2  |     |
| h2co     | -13.4 <sup>a</sup> | -23.8 | -25.2 | -36.3 | -16.7 | -14.2 | -33.5 | -30.6 | -30.5 | -30.5 | -29.5 | -29.4 | -29.2 | -29.2 |     |
| oxirene  | 110.7 <sup>a</sup> | 125.6 | 130.9 | 115.3 | 95.9  | 102.3 | 118.6 | 116.2 | 116.6 | 116.6 | 122.0 | 122.1 | 122.5 | 122.5 |     |
| formic   | -39.0 <sup>a</sup> | -24.6 | -34.8 | -39.2 | -53.2 | -41.5 | -37.0 | -29.8 | -29.4 | -29.5 | -29.8 | -29.6 | -29.4 | -29.4 |     |
| methanol | -7.8 <sup>a</sup>  | -11.6 | -14.3 | -18.4 | -23.4 | -14.0 | -14.5 | -8.6  | -8.2  | -8.2  | -9.2  | -9.0  | -8.7  | -8.7  |     |
| c2h4     | 45.4 <sup>a</sup>  | 61.2  | 63.0  | 57.9  | 50.5  | 53.7  | 52.2  | 48.3  | 48.7  | 48.6  | 55.1  | 55.4  | 55.5  | 55.5  |     |
| cf2      | 93.5 <sup>a</sup>  | 74.5  | 80.6  | 88.1  | 73.2  | 67.7  | 76.9  | 69.4  | 69.6  | 69.5  | 76.2  | 76.2  | 76.4  | 76.4  |     |
| f2o      | 154.6 <sup>a</sup> | 180.7 | 157.0 | 125.4 | 131.2 | 136.2 | 143.9 | 134.8 | 135.0 | 134.9 | 139.0 | 139.0 | 139.2 | 139.2 |     |
| hco      | 72.9 <sup>a</sup>  | 88.2  | 70.3  | 47.2  | 52.6  | 60.5  | 61.8  | 60.7  | 60.8  | 60.8  | 61.9  | 62.0  | 62.1  | 62.1  |     |
| ch2-trip | 115.6 <sup>a</sup> | 115.9 | 119.1 | 107.6 | 98.5  | 108.9 | 120.5 | 114.2 | 114.3 | 114.3 | 117.0 | 117.0 | 117.1 | 117.1 |     |
| h2o      | -30.5 <sup>a</sup> | -25.0 | -26.8 | -30.2 | -47.0 | -38.6 | -31.7 | -30.6 | -30.4 | -30.5 | -32.6 | -32.5 | -32.5 | -32.5 |     |
| ch       | 126.9 <sup>a</sup> | 143.7 | 148.4 | 151.5 | 137.7 | 136.8 | 137.2 | 131.2 | 131.2 | 131.2 | 136.3 | 136.3 | 136.3 | 136.3 |     |

. . . continued on next page . . .

Table S19: . . . continued from previous page . . .

| Species  | Ref.               | MNDO  | AMI   | PM3    | PM6    | PM7    | OM1   |       | OM2   |       | OM3   |       | OM3   |       | D3T |
|----------|--------------------|-------|-------|--------|--------|--------|-------|-------|-------|-------|-------|-------|-------|-------|-----|
|          |                    |       |       |        |        |        | D2    | D3    | D2    | D3    | D2    | D3    | D2    | D3    |     |
| co       | 62.1 <sup>a</sup>  | 73.3  | 80.6  | 61.5   | 67.7   | 64.9   | 54.6  | 51.0  | 51.1  | 51.1  | 60.7  | 60.7  | 60.8  | 60.8  |     |
| o2       | 97.1 <sup>a</sup>  | 70.5  | 71.1  | 71.1   | 61.9   | 74.0   | 74.6  | 75.7  | 75.8  | 75.8  | 73.0  | 73.0  | 73.0  | 73.0  |     |
| o        | 87.5 <sup>a</sup>  | 66.8  | 64.4  | 68.4   | 59.8   | 71.5   | 80.5  | 73.1  | 73.1  | 73.1  | 70.2  | 70.1  | 70.0  | 70.0  |     |
| c        | 191.4 <sup>a</sup> | 179.3 | 180.2 | 187.7  | 181.2  | 187.8  | 195.9 | 181.0 | 181.0 | 181.0 | 184.5 | 184.5 | 184.5 | 184.5 |     |
| ch       | 130.5 <sup>a</sup> | 115.1 | 120.2 | 128.4  | 124.7  | 123.2  | 117.3 | 128.9 | 129.0 | 129.0 | 115.9 | 115.9 | 115.9 | 115.9 |     |
| n        | 9.1 <sup>a</sup>   | -13.7 | -0.6  | -26.2  | -4.9   | 1.3    | -9.2  | -2.9  | -2.9  | -2.9  | 1.5   | 1.5   | 1.5   | 1.5   |     |
| c        | 82.7 <sup>a</sup>  | 47.9  | 61.7  | 56.7   | 82.5   | 79.0   | 62.2  | 74.3  | 74.3  | 74.3  | 72.3  | 72.3  | 72.3  | 72.3  |     |
| hoo      | -10.6 <sup>a</sup> | -23.4 | -8.0  | -5.5   | -1.1   | -1.1   | -17.1 | -18.7 | -18.6 | -18.7 | -14.6 | -14.5 | -14.5 | -14.5 |     |
| o2       | -41.7 <sup>a</sup> | -66.6 | -66.0 | -61.5  | -67.8  | -49.2  | -61.3 | -43.3 | -43.3 | -43.3 | -55.8 | -55.8 | -55.8 | -55.8 |     |
| h2o      | -32.2 <sup>a</sup> | -36.9 | -28.7 | -17.6  | -35.7  | -30.6  | -27.9 | -32.5 | -32.4 | -32.5 | -29.9 | -29.8 | -29.8 | -29.8 |     |
| h2       | 55.2 <sup>a</sup>  | 67.7  | 61.8  | 37.6   | 25.4   | 24.6   | 54.3  | 46.3  | 46.3  | 46.3  | 52.3  | 52.3  | 52.3  | 52.3  |     |
| nh2      | 15.3 <sup>a</sup>  | 10.2  | 10.6  | 10.0   | 9.5    | 10.4   | 11.9  | 19.2  | 19.3  | 19.3  | 14.7  | 14.7  | 14.9  | 14.9  |     |
| c2h4     | -30.7 <sup>a</sup> | -23.5 | -26.8 | -35.1  | -43.6  | -39.0  | -42.6 | -37.1 | -36.9 | -36.9 | -38.7 | -38.6 | -38.4 | -38.4 |     |
| c2h6     | -23.7 <sup>a</sup> | -21.9 | -21.9 | -35.8  | -35.4  | -29.3  | -33.9 | -30.0 | -29.6 | -29.6 | -33.0 | -32.7 | -32.4 | -32.4 |     |
| ch2ch    | 76.4 <sup>a</sup>  | 100.6 | 80.5  | 61.9   | 64.5   | 70.9   | 80.7  | 76.1  | 76.3  | 76.3  | 77.4  | 77.7  | 77.7  | 77.7  |     |
| ch3f     | -21.3 <sup>a</sup> | -23.2 | -25.2 | -35.9  | -34.3  | -24.1  | -31.1 | -32.5 | -32.2 | -32.2 | -32.1 | -31.9 | -31.7 | -31.7 |     |
| ch4      | -28.5 <sup>a</sup> | -24.2 | -23.2 | -40.9  | -41.9  | -35.1  | -35.2 | -36.4 | -36.2 | -36.1 | -39.4 | -39.3 | -39.0 | -39.0 |     |
| cf2      | -34.0 <sup>a</sup> | -40.3 | -35.7 | -46.9  | -48.0  | -41.7  | -39.3 | -38.0 | -38.0 | -38.0 | -38.7 | -38.7 | -38.4 | -38.4 |     |
| ch3      | -44.9 <sup>a</sup> | -40.7 | -46.4 | -48.7  | -67.5  | -70.5  | -67.5 | -66.2 | -66.0 | -66.1 | -61.9 | -61.8 | -61.8 | -61.8 |     |
| cch      | 80.9 <sup>a</sup>  | 152.1 | 129.9 | 112.4  | 82.0   | 90.0   | 102.2 | 88.3  | 88.5  | 88.4  | 91.6  | 91.7  | 91.7  | 91.7  |     |
| ch2-trip | 42.6 <sup>a</sup>  | 24.0  | 28.8  | 14.6   | 10.4   | 20.6   | 28.7  | 33.0  | 33.1  | 33.1  | 27.6  | 27.6  | 27.8  | 27.8  |     |
| f2       | 47.5 <sup>a</sup>  | 92.1  | 46.9  | 18.8   | 50.0   | 47.4   | 58.7  | 54.0  | 54.1  | 54.0  | 52.5  | 52.5  | 52.5  | 52.5  |     |
| cf       | 74.6 <sup>a</sup>  | 101.7 | 84.6  | 71.2   | 80.2   | 90.0   | 88.3  | 84.9  | 84.9  | 84.9  | 87.1  | 87.1  | 87.2  | 87.2  |     |
| h2       | -91.0 <sup>a</sup> | -73.1 | -84.1 | -100.1 | -120.0 | -122.8 | -97.9 | -98.5 | -98.5 | -98.5 | -97.3 | -97.2 | -97.4 | -97.4 |     |
| c        | 81.3 <sup>a</sup>  | 130.7 | 111.6 | 84.7   | 90.9   | 101.5  | 99.1  | 95.2  | 95.2  | 95.2  | 97.7  | 97.7  | 97.7  | 97.7  |     |
| f        | -39.5 <sup>a</sup> | -16.8 | -17.6 | -46.2  | -43.1  | -32.3  | -43.3 | -37.8 | -37.9 | -37.9 | -41.0 | -41.1 | -41.2 | -41.2 |     |
| f        | -12.4 <sup>a</sup> | -7.2  | 20.1  | 6.2    | -12.9  | 10.3   | -13.7 | -6.9  | -7.0  | -7.0  | -6.4  | -6.4  | -6.5  | -6.5  |     |
| o        | 52.5 <sup>a</sup>  | 69.6  | 73.9  | 58.7   | 65.5   | 62.3   | 60.5  | 48.5  | 48.4  | 48.4  | 57.9  | 57.8  | 57.8  | 57.8  |     |
| n        | 129.8 <sup>a</sup> | 111.5 | 107.9 | 109.6  | 88.0   | 92.9   | 121.9 | 125.3 | 125.2 | 125.2 | 106.3 | 106.3 | 106.2 | 106.2 |     |
| ch3      | 74.4 <sup>a</sup>  | 90.8  | 76.3  | 47.6   | 47.6   | 47.5   | 72.9  | 69.6  | 69.7  | 69.6  | 70.8  | 70.8  | 70.9  | 70.9  |     |
| fo2      | -23.1 <sup>a</sup> | -24.6 | -25.1 | -26.6  | -33.7  | -31.6  | -24.9 | -15.0 | -14.9 | -14.9 | -22.3 | -22.2 | -22.3 | -22.3 |     |
| o2       | -26.8 <sup>a</sup> | -53.6 | -47.2 | -43.8  | -44.3  | -38.7  | -45.8 | -43.6 | -43.6 | -43.6 | -44.4 | -44.4 | -44.4 | -44.4 |     |
| f2       | -26.9 <sup>a</sup> | -1.9  | -39.8 | -22.3  | -43.8  | -49.3  | -17.4 | -11.2 | -11.2 | -11.2 | -16.3 | -16.3 | -16.3 | -16.3 |     |
| hf       | -64.6 <sup>a</sup> | -41.5 | -53.2 | -40.8  | -84.0  | -74.7  | -68.0 | -51.5 | -51.5 | -51.5 | -59.0 | -59.0 | -59.0 | -59.0 |     |
| o        | 12.4 <sup>a</sup>  | 28.1  | 16.5  | 11.1   | -14.6  | -4.6   | 5.7   | 5.0   | 4.9   | 5.0   | 7.5   | 7.4   | 7.4   | 7.4   |     |
| f        | -28.6 <sup>a</sup> | -1.9  | -13.5 | -10.3  | -59.8  | -44.7  | -30.7 | -19.1 | -19.2 | -19.2 | -22.7 | -22.8 | -22.9 | -22.9 |     |
| no       | -6.5 <sup>a</sup>  | 20.9  | 10.5  | 9.3    | -4.8   | -3.5   | -1.0  | 10.2  | 10.2  | 10.3  | 3.5   | 3.5   | 3.6   | 3.6   |     |
| n2       | -39.3 <sup>a</sup> | -6.4  | -21.5 | -14.7  | -26.0  | -23.9  | -38.7 | -30.7 | -30.7 | -30.6 | -34.7 | -34.7 | -34.5 | -34.5 |     |
| hno      | 25.1 <sup>a</sup>  | 56.9  | 36.2  | 25.1   | 8.3    | 14.3   | 23.8  | 29.2  | 29.2  | 29.2  | 22.9  | 22.9  | 22.9  | 22.9  |     |
| hcn      | 39.7 <sup>a</sup>  | 60.7  | 39.2  | 39.6   | 13.1   | 21.4   | 29.0  | 23.1  | 23.1  | 23.2  | 30.1  | 30.1  | 30.3  | 30.3  |     |
| n        | 71.1 <sup>a</sup>  | 127.7 | 105.2 | 90.4   | 45.4   | 60.3   | 92.4  | 80.6  | 80.5  | 80.6  | 86.5  | 86.5  | 86.5  | 86.5  |     |
| c2h2     | -31.1 <sup>a</sup> | 14.0  | -16.4 | -10.0  | -35.5  | -23.3  | -21.3 | -18.6 | -18.4 | -18.5 | -20.6 | -20.4 | -20.4 | -20.4 |     |
| c2h4     | 5.8 <sup>a</sup>   | 44.9  | 20.4  | 17.3   | -14.9  | -4.7   | 13.4  | 18.0  | 18.3  | 18.1  | 11.9  | 12.1  | 12.1  | 12.1  |     |
| ch4      | 11.4 <sup>a</sup>  | 60.8  | 43.9  | 31.6   | -3.7   | 4.3    | 22.5  | 20.7  | 20.8  | 20.8  | 19.0  | 19.2  | 19.2  | 19.2  |     |
| ch2-trip | 50.1 <sup>a</sup>  | 79.3  | 60.4  | 52.0   | 24.4   | 37.9   | 69.3  | 73.9  | 74.0  | 74.0  | 67.8  | 67.7  | 67.9  | 67.9  |     |

. . . continued on next page . . .

Table S19: ... continued from previous page ...

| Species                      | Ref.                | MNDO   | AM1               | PM3    | PM6    | PM7    | OM1    |        | OM2    |        | OM3    |        | OM3    |        | D3T    |
|------------------------------|---------------------|--------|-------------------|--------|--------|--------|--------|--------|--------|--------|--------|--------|--------|--------|--------|
|                              |                     |        |                   |        |        |        | D2     | D3     | D2     | D3     | D2     | D3     | D2     | D3     |        |
| t-hcoH                       | 97.8 <sup>a</sup>   | 121.0  | 107.5             | 103.2  | 63.7   | 74.9   | 84.6   | 86.7   | 86.9   | 86.9   | 85.1   | 85.2   | 85.4   | 85.4   | 85.4   |
| ch2c                         | 91.9 <sup>a</sup>   | 144.4  | 113.5             | 110.8  | 74.6   | 82.0   | 82.1   | 82.0   | 82.1   | 82.1   | 82.1   | 85.2   | 85.2   | 85.2   | 85.2   |
| oxirene                      | 97.4 <sup>a</sup>   | 137.7  | 120.6             | 111.4  | 60.1   | 74.0   | 109.6  | 116.7  | 116.7  | 116.7  | 116.0  | 116.1  | 116.5  | 116.5  | 116.5  |
| c2h4                         | 80.2 <sup>a</sup>   | 73.4   | 52.1 <sup>a</sup> | 54.1   | 14.7   | 25.4   | 43.2   | 48.5   | 48.7   | 48.7   | 49.2   | 49.4   | 49.5   | 49.5   | 49.5   |
| cf2                          | 80.2 <sup>a</sup>   | 86.6   | 70.4              | 84.3   | 37.4   | 39.5   | 67.8   | 69.6   | 69.7   | 69.7   | 70.2   | 70.2   | 70.4   | 70.4   | 70.4   |
| hco                          | 83.6 <sup>a</sup>   | 95.4   | 76.5              | 53.0   | 49.4   | 54.8   | 62.2   | 59.8   | 59.9   | 59.9   | 61.9   | 61.9   | 62.0   | 62.0   | 62.0   |
| ch2-trip                     | 102.3 <sup>a</sup>  | 128.0  | 108.8             | 103.8  | 62.7   | 80.6   | 111.4  | 114.4  | 114.5  | 114.5  | 111.0  | 111.0  | 111.2  | 111.2  | 111.2  |
| ch                           | 113.6 <sup>a</sup>  | 155.9  | 138.2             | 147.7  | 101.9  | 108.5  | 128.2  | 131.4  | 131.4  | 131.4  | 130.3  | 130.3  | 130.3  | 130.3  | 130.3  |
| co                           | 48.8 <sup>a</sup>   | 85.5   | 70.3              | 57.6   | 31.9   | 36.6   | 45.6   | 51.2   | 51.2   | 51.2   | 51.2   | 54.7   | 54.8   | 54.8   | 54.8   |
| c                            | 178.1 <sup>a</sup>  | 191.5  | 170.0             | 183.9  | 145.4  | 159.5  | 186.9  | 181.1  | 181.0  | 181.1  | 181.1  | 178.6  | 178.6  | 178.6  | 178.6  |
| hoo                          | -23.9 <sup>a</sup>  | -11.2  | -18.3             | -9.3   | -36.9  | -29.4  | -26.1  | -18.6  | -18.5  | -18.5  | -18.5  | -20.5  | -20.4  | -20.4  | -20.4  |
| o2                           | -55.0 <sup>a</sup>  | -54.5  | -76.2             | -65.3  | -103.5 | -77.5  | -70.3  | -43.2  | -43.1  | -43.1  | -43.1  | -61.8  | -61.7  | -61.7  | -61.7  |
| h2o                          | -45.5 <sup>a</sup>  | -24.7  | -38.9             | -21.5  | -71.5  | -58.8  | -37.0  | -32.4  | -32.3  | -32.3  | -35.8  | -35.8  | -35.8  | -35.8  | -35.8  |
| h2                           | 41.8 <sup>a</sup>   | 79.9   | 51.5              | 33.8   | -10.4  | -3.6   | 45.3   | 46.5   | 46.4   | 46.4   | 46.4   | 46.3   | 46.3   | 46.3   | 46.3   |
| ch2ch                        | 87.1 <sup>a</sup>   | 107.8  | 86.8              | 67.8   | 61.4   | 65.2   | 81.1   | 75.2   | 75.5   | 75.4   | 77.3   | 77.6   | 77.6   | 77.6   | 77.6   |
| ceh                          | 91.6 <sup>a</sup>   | 159.4  | 136.2             | 118.2  | 78.9   | 84.3   | 102.6  | 87.4   | 87.5   | 87.5   | 91.6   | 91.6   | 91.6   | 91.6   | 91.6   |
| cf                           | 85.4 <sup>a</sup>   | 108.9  | 90.8              | 77.1   | 77.1   | 84.3   | 88.7   | 84.0   | 84.0   | 84.0   | 87.1   | 87.0   | 87.1   | 87.1   | 87.1   |
| c                            | 92.0 <sup>a</sup>   | 137.9  | 117.9             | 90.6   | 87.8   | 95.8   | 99.5   | 94.3   | 94.2   | 94.3   | 97.7   | 97.6   | 97.6   | 97.6   | 97.6   |
| f                            | -1.7 <sup>a</sup>   | 0.0    | 26.4              | 12.0   | -16.1  | 4.6    | -13.3  | -7.9   | -8.0   | -7.9   | -6.4   | -6.5   | -6.6   | -6.6   | -6.6   |
| o                            | 39.2 <sup>a</sup>   | 81.8   | 63.7              | 54.9   | 29.7   | 34.1   | 51.5   | 48.6   | 48.5   | 48.6   | 51.9   | 51.9   | 51.8   | 51.8   | 51.8   |
| HAT707 (ZPVE-exclusive, 0 K) |                     |        |                   |        |        |        |        |        |        |        |        |        |        |        |        |
| ch3                          | -26.6 <sup>a</sup>  | -26.6  | -31.4             | -32.8  | -33.1  | -37.0  | -29.2  | -20.1  | -19.8  | -19.9  | -25.0  | -24.9  | -24.7  | -24.7  | -24.7  |
| fo2                          | -124.0 <sup>a</sup> | -144.4 | -135.4            | -119.7 | -117.1 | -119.1 | -130.5 | -107.7 | -107.4 | -107.5 | -121.5 | -121.4 | -121.3 | -121.3 | -121.3 |
| f2o                          | -48.6 <sup>a</sup>  | -94.7  | -74.1             | -72.1  | -34.4  | -48.7  | -62.1  | -56.1  | -55.9  | -56.0  | -61.9  | -61.7  | -61.6  | -61.6  | -61.6  |
| of                           | -25.6 <sup>a</sup>  | -70.4  | -49.3             | -45.2  | -0.3   | -16.7  | -37.1  | -41.2  | -41.1  | -41.1  | -39.4  | -39.4  | -39.2  | -39.2  | -39.2  |
| o2                           | -127.7 <sup>a</sup> | -174.4 | -158.4            | -137.4 | -128.0 | -126.5 | -151.9 | -136.8 | -136.6 | -136.6 | -144.1 | -144.0 | -143.9 | -143.9 | -143.9 |
| of                           | -100.9 <sup>a</sup> | -120.1 | -110.5            | -92.8  | -83.0  | -87.2  | -105.4 | -92.7  | -92.6  | -92.6  | -99.1  | -99.1  | -98.9  | -98.9  | -98.9  |
| f2                           | -52.5 <sup>a</sup>  | -72.3  | -90.0             | -68.0  | -43.8  | -66.1  | -54.8  | -52.7  | -52.5  | -52.6  | -56.0  | -56.0  | -55.9  | -55.9  | -55.9  |
| hf                           | -90.2 <sup>a</sup>  | -111.2 | -102.9            | -85.2  | -85.1  | -91.8  | -103.9 | -92.5  | -92.4  | -92.4  | -98.0  | -98.0  | -97.9  | -97.9  | -97.9  |
| o                            | -88.6 <sup>a</sup>  | -91.9  | -94.5             | -81.7  | -98.1  | -92.2  | -100.0 | -87.8  | -87.8  | -87.8  | -91.8  | -91.8  | -91.7  | -91.7  | -91.7  |
| f                            | -54.1 <sup>a</sup>  | -72.4  | -63.8             | -55.9  | -60.6  | -61.8  | -68.3  | -60.6  | -60.6  | -60.6  | -62.6  | -62.6  | -62.5  | -62.5  | -62.5  |
| no                           | -32.1 <sup>a</sup>  | -49.3  | -38.4             | -35.5  | -4.5   | -19.7  | -37.9  | -31.0  | -30.9  | -30.8  | -35.9  | -35.9  | -35.6  | -35.6  | -35.6  |
| o2                           | 24.0 <sup>a</sup>   | 20.1   | 28.1              | 19.5   | 27.4   | 28.3   | 26.8   | 27.8   | 27.9   | 28.0   | 20.9   | 20.9   | 21.2   | 21.2   | 21.2   |
| n2                           | -64.8 <sup>a</sup>  | -76.2  | -70.2             | -59.1  | -25.2  | -39.5  | -75.5  | -71.7  | -71.6  | -71.5  | -73.9  | -73.9  | -73.6  | -73.6  | -73.6  |
| no                           | 35.0 <sup>a</sup>   | -5.9   | 0.7               | 12.2   | 31.7   | 25.0   | 12.9   | 31.0   | 31.2   | 31.3   | 5.8    | 5.8    | 6.1    | 6.1    | 6.1    |
| hno                          | -0.5 <sup>a</sup>   | -11.9  | -12.2             | -19.2  | 8.4    | -1.6   | -12.3  | -11.7  | -11.5  | -11.5  | -15.9  | -15.8  | -15.6  | -15.6  | -15.6  |
| hoo                          | 54.0 <sup>a</sup>   | 62.0   | 66.3              | 36.3   | 58.9   | 58.8   | 55.3   | 45.9   | 46.1   | 46.2   | 49.9   | 50.0   | 50.3   | 50.3   | 50.3   |
| hco                          | 72.2 <sup>a</sup>   | 37.2   | 41.0              | 28.5   | 51.0   | 52.6   | 40.9   | 38.5   | 38.6   | 38.7   | 37.1   | 37.1   | 37.5   | 37.5   | 37.5   |
| hno                          | 144.6 <sup>a</sup>  | 107.2  | 111.4             | 124.5  | 138.7  | 129.6  | 111.5  | 112.4  | 112.6  | 112.6  | 108.3  | 108.3  | 108.6  | 108.6  | 108.6  |
| hcn                          | 14.1 <sup>a</sup>   | -10.2  | -10.5             | -5.4   | 12.5   | 4.4    | -8.6   | -18.9  | -18.7  | -18.6  | -9.8   | -9.8   | -9.4   | -9.4   | -9.4   |
| oh                           | 15.6 <sup>a</sup>   | 17.4   | 20.2              | 8.3    | 15.6   | 16.5   | 22.5   | 17.7   | 17.8   | 17.8   | 21.4   | 21.4   | 21.7   | 21.7   | 21.7   |
| o                            | 69.7 <sup>a</sup>   | 81.6   | 81.1              | 65.5   | 65.5   | 65.5   | 79.5   | 66.5   | 66.5   | 66.5   | 69.7   | 69.7   | 69.7   | 69.7   | 69.7   |
| n                            | 45.5 <sup>a</sup>   | 58.3   | 56.6              | 46.3   | 45.9   | 44.5   | 56.2   | 40.0   | 40.0   | 40.0   | 47.8   | 47.8   | 47.9   | 47.9   | 47.9   |
| c2h2                         | -56.7 <sup>a</sup>  | -56.5  | -66.2             | -55.3  | -36.5  | -40.3  | -59.0  | -60.6  | -60.4  | -60.4  | -60.7  | -60.4  | -60.3  | -60.3  | -60.3  |
| c2h4                         | -19.8 <sup>a</sup>  | -24.0  | -27.4             | -27.1  | -14.3  | -20.3  | -22.8  | -22.2  | -21.8  | -22.0  | -26.4  | -26.2  | -26.1  | -26.1  | -26.1  |

... continued on next page ...

Table S19: . . . continued from previous page . . .

| Species  | Ref.               | MNDO   | AM1    | PM3    | PM6    | PM7   | OM1    |       | OM2   |       | OM3   |        | OM3    |        | D3T    |
|----------|--------------------|--------|--------|--------|--------|-------|--------|-------|-------|-------|-------|--------|--------|--------|--------|
|          |                    |        |        |        |        |       | D2     | D3    | D2    | D3    | D2    | D3     | D2     | D3     |        |
| ch4      | -14.1 <sup>a</sup> | -8.0   | -4.1   | -13.0  | -3.4   | -11.4 | -13.9  | -20.7 | -20.3 | -20.4 | -20.4 | -19.9  | -19.6  | -19.5  | -19.5  |
| h2o      | 5.3 <sup>a</sup>   | 13.1   | 15.0   | 22.7   | 18.5   | 12.5  | 18.7   | 20.4  | 20.6  | 20.6  | 20.6  | 16.4   | 16.4   | 16.7   | 16.7   |
| ch2-trip | 24.5 <sup>a</sup>  | 11.9   | 13.6   | 10.6   | 26.1   | 23.8  | 34.2   | 34.5  | 34.5  | 34.6  | 34.6  | 30.5   | 30.5   | 30.8   | 30.8   |
| t-hcoh   | 72.2 <sup>a</sup>  | 52.4   | 60.0   | 58.9   | 65.1   | 60.2  | 49.6   | 47.1  | 47.4  | 47.4  | 47.4  | 47.4   | 47.6   | 47.9   | 47.9   |
| hco      | -10.5 <sup>a</sup> | -21.8  | -15.6  | -22.7  | -19.7  | -20.9 | -24.8  | -24.0 | -23.7 | -23.7 | -23.7 | -28.8  | -28.6  | -28.2  | -28.2  |
| hooh     | 148.6 <sup>a</sup> | 159.4  | 162.0  | 147.2  | 153.5  | 146.6 | 141.5  | 140.3 | 140.6 | 140.6 | 140.6 | 138.4  | 138.5  | 138.9  | 138.9  |
| ch2c     | 66.3 <sup>a</sup>  | 75.8   | 65.8   | 67.5   | 76.3   | 67.3  | 46.6   | 42.1  | 42.3  | 42.3  | 42.3  | 47.1   | 47.3   | 47.5   | 47.5   |
| h2co     | 74.6 <sup>a</sup>  | 63.5   | 64.9   | 68.7   | 86.2   | 79.4  | 59.9   | 61.0  | 61.2  | 61.3  | 61.3  | 63.2   | 63.3   | 63.7   | 63.7   |
| oxirene  | 71.8 <sup>a</sup>  | 67.8   | 72.7   | 67.4   | 61.4   | 58.6  | 73.2   | 76.8  | 77.2  | 77.2  | 77.2  | 77.6   | 77.7   | 78.3   | 78.3   |
| formic   | 49.0 <sup>a</sup>  | 61.5   | 55.2   | 65.0   | 49.9   | 52.0  | 55.0   | 61.8  | 62.2  | 62.2  | 62.2  | 61.8   | 62.1   | 62.4   | 62.4   |
| methanol | 80.1 <sup>a</sup>  | 75.3   | 75.8   | 86.1   | 80.1   | 79.9  | 78.8   | 83.5  | 84.0  | 84.0  | 84.0  | 83.6   | 83.8   | 84.3   | 84.3   |
| c2h4     | 6.6 <sup>a</sup>   | 3.7    | 4.1    | 10.1   | 14.9   | 9.1   | 6.6    | 7.9   | 8.3   | 8.2   | 8.2   | 10.5   | 10.8   | 11.1   | 11.1   |
| cf2      | 54.6 <sup>a</sup>  | 17.6   | 22.3   | 40.5   | 38.7   | 24.4  | 32.4   | 29.6  | 29.9  | 29.9  | 29.9  | 32.3   | 32.4   | 32.7   | 32.7   |
| f2o      | 242.6 <sup>a</sup> | 268.9  | 249.0  | 232.2  | 235.0  | 230.9 | 238.0  | 226.9 | 227.1 | 227.1 | 227.1 | 232.5  | 232.6  | 232.9  | 232.9  |
| hco      | -17.3 <sup>a</sup> | -22.8  | -32.1  | -37.8  | -32.0  | -30.5 | -41.4  | -31.1 | -30.9 | -30.9 | -30.9 | -35.4  | -35.3  | -35.1  | -35.1  |
| ch2-trip | 76.7 <sup>a</sup>  | 60.8   | 62.6   | 61.6   | 65.7   | 67.6  | 77.1   | 76.1  | 76.2  | 76.3  | 76.3  | 74.5   | 74.5   | 74.9   | 74.9   |
| h2o      | 57.5 <sup>a</sup>  | 62.0   | 64.0   | 73.6   | 58.1   | 56.3  | 61.6   | 62.0  | 62.2  | 62.2  | 62.2  | 60.3   | 60.5   | 60.7   | 60.7   |
| ch       | 88.0 <sup>a</sup>  | 87.3   | 90.6   | 104.3  | 103.3  | 93.5  | 93.0   | 91.6  | 91.7  | 91.7  | 91.7  | 92.6   | 92.6   | 92.8   | 92.8   |
| co       | 23.2 <sup>a</sup>  | 16.1   | 22.0   | 13.5   | 33.0   | 21.4  | 9.8    | 11.0  | 11.1  | 11.1  | 11.1  | 16.5   | 16.5   | 16.7   | 16.7   |
| o2       | 185.1 <sup>a</sup> | 158.1  | 162.0  | 176.4  | 165.7  | 168.4 | 168.8  | 167.9 | 168.0 | 168.0 | 168.0 | 166.4  | 166.4  | 166.7  | 166.7  |
| o        | 175.5 <sup>a</sup> | 154.2  | 154.6  | 173.3  | 162.3  | 164.6 | 173.8  | 164.6 | 164.6 | 164.6 | 164.6 | 162.8  | 162.8  | 162.9  | 162.9  |
| c        | 152.5 <sup>a</sup> | 121.7  | 121.2  | 139.7  | 145.9  | 143.7 | 150.9  | 140.7 | 140.7 | 140.7 | 140.8 | 140.1  | 140.1  | 140.3  | 140.3  |
| ch       | 146.1 <sup>a</sup> | 134.7  | 142.0  | 138.2  | 141.8  | 141.6 | 142.5  | 148.9 | 149.0 | 149.1 | 149.1 | 139.5  | 139.5  | 139.7  | 139.7  |
| n        | 97.1 <sup>a</sup>  | 73.6   | 89.8   | 78.6   | 97.9   | 94.7  | 84.2   | 88.7  | 88.7  | 88.8  | 88.8  | 94.1   | 94.1   | 94.2   | 94.2   |
| c        | 98.2 <sup>a</sup>  | 64.4   | 80.8   | 64.2   | 97.1   | 94.9  | 84.5   | 91.4  | 91.4  | 91.5  | 91.5  | 93.3   | 93.3   | 93.5   | 93.5   |
| hoo      | -49.4 <sup>a</sup> | -81.8  | -67.4  | -55.0  | -37.2  | -46.0 | -63.0  | -59.6 | -59.4 | -59.4 | -59.4 | -59.9  | -59.7  | -59.6  | -59.6  |
| o2       | -80.6 <sup>a</sup> | -124.7 | -125.3 | -110.3 | -104.0 | -94.1 | -107.5 | -84.3 | -84.2 | -84.2 | -84.2 | -101.3 | -101.3 | -101.0 | -101.0 |
| h2o      | -71.1 <sup>a</sup> | -93.9  | -87.0  | -65.6  | -69.9  | -74.0 | -73.3  | -72.8 | -72.6 | -72.6 | -72.6 | -74.6  | -74.5  | -74.4  | -74.4  |
| oh       | -38.9 <sup>a</sup> | -56.6  | -58.3  | -47.3  | -34.9  | -43.8 | -45.1  | -39.9 | -39.8 | -39.8 | -39.8 | -44.4  | -44.3  | -44.2  | -44.2  |
| h2       | 16.3 <sup>a</sup>  | 14.8   | 5.8    | -6.6   | -11.4  | -20.6 | 13.1   | 8.6   | 8.6   | 8.7   | 8.7   | 10.8   | 10.8   | 10.9   | 10.9   |
| nh2      | 30.9 <sup>a</sup>  | 28.9   | 31.9   | 19.6   | 26.0   | 28.5  | 36.0   | 38.0  | 38.1  | 38.2  | 38.2  | 37.2   | 37.3   | 37.6   | 37.6   |
| c2h4     | 57.3 <sup>a</sup>  | 64.2   | 63.7   | 70.3   | 59.2   | 54.4  | 50.3   | 54.3  | 54.6  | 54.6  | 54.6  | 53.8   | 53.9   | 54.3   | 54.3   |
| c2h6     | 64.3 <sup>a</sup>  | 65.5   | 68.4   | 68.5   | 67.3   | 64.2  | 59.2   | 61.3  | 61.7  | 61.8  | 61.8  | 59.4   | 59.8   | 60.2   | 60.2   |
| ch2ch    | -13.8 <sup>a</sup> | -10.0  | -21.2  | -22.5  | -19.7  | -19.7 | -22.6  | -15.7 | -15.3 | -15.4 | -15.4 | -20.0  | -19.7  | -19.6  | -19.6  |
| ch3f     | 66.7 <sup>a</sup>  | 64.0   | 65.0   | 68.7   | 68.6   | 69.6  | 62.0   | 58.7  | 59.1  | 59.1  | 59.1  | 60.3   | 60.5   | 60.9   | 60.9   |
| ch4      | 59.5 <sup>a</sup>  | 63.5   | 67.5   | 63.0   | 61.7   | 59.3  | 58.3   | 55.0  | 55.3  | 55.4  | 55.4  | 53.1   | 53.4   | 53.8   | 53.8   |
| ch3      | 54.0 <sup>a</sup>  | 47.5   | 54.9   | 58.3   | 55.2   | 52.3  | 55.4   | 54.3  | 54.6  | 54.6  | 54.6  | 55.3   | 55.3   | 55.8   | 55.8   |
| cf2      | 43.1 <sup>a</sup>  | 47.6   | 44.6   | 57.2   | 36.4   | 24.2  | 25.7   | 25.4  | 25.6  | 25.6  | 25.6  | 30.7   | 30.8   | 31.0   | 31.0   |
| cch      | -9.3 <sup>a</sup>  | 36.9   | 25.8   | 25.8   | -4.3   | -3.2  | -1.5   | -3.8  | -3.6  | -3.7  | -3.7  | -17.4  | -17.4  | -17.2  | -17.2  |
| ch2-trip | 130.6 <sup>a</sup> | 114.6  | 122.2  | 122.5  | 116.3  | 117.6 | 124.6  | 127.2 | 127.4 | 127.4 | 127.4 | 122.8  | 122.8  | 123.2  | 123.2  |
| f2       | 135.5 <sup>a</sup> | 179.1  | 136.7  | 123.7  | 152.5  | 140.3 | 150.8  | 144.6 | 144.7 | 144.7 | 144.7 | 144.2  | 144.2  | 144.3  | 144.3  |
| cf       | -15.6 <sup>a</sup> | -10.9  | -19.2  | -14.7  | -5.7   | -2.6  | -16.6  | -8.6  | -8.5  | -8.5  | -8.5  | -11.9  | -11.8  | -11.7  | -11.7  |
| h2       | -3.0 <sup>a</sup>  | 15.9   | 7.2    | 5.4    | -19.1  | -31.9 | -2.5   | -5.4  | -5.3  | -5.4  | -5.4  | -3.4   | -3.2   | -3.2   | -3.2   |
| c        | -8.9 <sup>a</sup>  | 17.9   | 7.4    | -1.7   | 4.6    | 8.7   | -6.2   | 1.5   | 1.5   | 1.5   | 1.5   | -1.5   | -1.5   | -1.4   | -1.4   |
| f        | 48.5 <sup>a</sup>  | 69.8   | 71.6   | 57.8   | 58.4   | 60.0  | 48.5   | 52.6  | 52.6  | 52.6  | 52.6  | 50.4   | 50.4   | 50.4   | 50.4   |

. . . continued on next page . . .

Table S19: . . . continued from previous page . . .

| Species  | Ref.                | MNDO   | AM1    | PM3    | PM6    | PM7    | OM1    |        | OM2    |        | OM3    |        | OM3    |        | D3T    |
|----------|---------------------|--------|--------|--------|--------|--------|--------|--------|--------|--------|--------|--------|--------|--------|--------|
|          |                     |        |        |        |        |        | D2     | D3     | D2     | D3     | D2     | D3     | D2     | D3     |        |
| f        | -102.6 <sup>a</sup> | -120.2 | -84.3  | -80.6  | -99.8  | -82.8  | -118.9 | -100.7 | -100.7 | -100.6 | -105.6 | -105.6 | -105.6 | -105.6 | -105.6 |
| o        | 13.6 <sup>a</sup>   | 12.2   | 14.6   | 10.5   | 29.6   | 17.6   | 14.8   | 7.7    | 7.7    | 7.7    | 12.9   | 12.9   | 12.9   | 12.9   | 12.9   |
| n        | 145.4 <sup>a</sup>  | 128.6  | 127.5  | 117.6  | 102.8  | 109.0  | 144.6  | 142.7  | 142.7  | 142.8  | 127.5  | 127.5  | 127.5  | 127.6  | 127.6  |
| ch3      | -17.6 <sup>a</sup>  | -44.4  | -38.8  | -31.1  | -37.6  | -45.6  | -23.0  | -21.5  | -21.3  | -21.4  | -23.4  | -23.4  | -23.4  | -23.3  | -23.3  |
| fo2      | -115.1 <sup>a</sup> | -162.3 | -142.8 | -118.0 | -121.7 | -127.8 | -124.3 | -109.1 | -108.9 | -109.0 | -120.0 | -119.9 | -119.9 | -119.9 | -119.9 |
| f2o      | -201.1 <sup>a</sup> | -216.4 | -195.3 | -211.9 | -180.3 | -192.3 | -213.0 | -196.9 | -196.7 | -196.8 | -202.0 | -201.8 | -201.9 | -201.9 | -201.9 |
| of       | -178.1 <sup>a</sup> | -192.1 | -170.5 | -185.0 | -146.2 | -160.3 | -187.9 | -182.0 | -181.8 | -181.9 | -179.6 | -179.5 | -179.5 | -179.5 | -179.5 |
| o2       | -118.8 <sup>a</sup> | -192.3 | -165.9 | -135.8 | -132.5 | -135.2 | -145.7 | -138.2 | -138.1 | -138.2 | -142.6 | -142.5 | -142.5 | -142.5 | -142.5 |
| of       | -92.0 <sup>a</sup>  | -137.9 | -118.0 | -91.1  | -87.6  | -95.9  | -99.2  | -94.2  | -94.1  | -94.2  | -97.6  | -97.6  | -97.6  | -97.6  | -97.6  |
| f2       | -205.0 <sup>a</sup> | -194.0 | -211.2 | -207.8 | -189.7 | -209.8 | -205.6 | -193.4 | -193.3 | -193.4 | -196.2 | -196.2 | -196.2 | -196.2 | -196.2 |
| hf       | -242.7 <sup>a</sup> | -232.9 | -224.1 | -225.0 | -231.0 | -235.4 | -254.7 | -233.2 | -233.1 | -233.2 | -238.1 | -238.1 | -238.1 | -238.2 | -238.2 |
| o        | -79.7 <sup>a</sup>  | -109.7 | -101.9 | -80.0  | -102.7 | -100.9 | -93.8  | -89.3  | -89.3  | -89.3  | -90.3  | -90.3  | -90.3  | -90.4  | -90.4  |
| f        | -206.7 <sup>a</sup> | -194.1 | -185.0 | -195.6 | -206.6 | -205.4 | -219.1 | -201.3 | -201.3 | -201.4 | -202.7 | -202.7 | -202.7 | -202.8 | -202.8 |
| no       | -184.6 <sup>a</sup> | -171.0 | -159.6 | -175.2 | -150.4 | -163.3 | -188.8 | -171.7 | -171.6 | -171.6 | -176.0 | -176.0 | -176.0 | -175.9 | -175.9 |
| o2       | -74.3 <sup>a</sup>  | -44.3  | -52.8  | -44.7  | -69.7  | -66.6  | -57.7  | -63.6  | -63.5  | -63.5  | -72.4  | -72.4  | -72.4  | -72.3  | -72.3  |
| n2       | -217.4 <sup>a</sup> | -197.9 | -191.4 | -198.8 | -171.1 | -183.2 | -226.3 | -212.4 | -212.3 | -212.3 | -214.0 | -213.9 | -213.9 | -213.9 | -213.9 |
| no       | -63.2 <sup>a</sup>  | -70.3  | -80.1  | -52.0  | -65.4  | -69.8  | -71.6  | -60.3  | -60.2  | -60.2  | -87.5  | -87.4  | -87.4  | -87.4  | -87.4  |
| hno      | -153.0 <sup>a</sup> | -133.7 | -133.4 | -159.0 | -137.5 | -145.2 | -163.2 | -152.4 | -152.3 | -152.3 | -156.1 | -155.9 | -155.9 | -155.9 | -155.9 |
| hoo      | -44.2 <sup>a</sup>  | -2.4   | -14.6  | -27.8  | -38.1  | -36.1  | -29.2  | -45.4  | -45.3  | -45.3  | -43.4  | -43.3  | -43.3  | -43.3  | -43.3  |
| hco      | -26.0 <sup>a</sup>  | -27.2  | -39.9  | -35.6  | -46.0  | -42.3  | -43.5  | -52.9  | -52.8  | -52.7  | -56.2  | -56.2  | -56.2  | -56.0  | -56.0  |
| hcn      | -138.4 <sup>a</sup> | -131.9 | -131.6 | -145.1 | -133.4 | -139.2 | -159.4 | -159.6 | -159.5 | -159.4 | -150.0 | -149.9 | -149.7 | -149.7 | -149.7 |
| oh       | -82.7 <sup>a</sup>  | -47.1  | -60.7  | -55.9  | -81.4  | -78.3  | -62.0  | -73.7  | -73.6  | -73.6  | -71.9  | -71.9  | -71.8  | -71.8  | -71.8  |
| o        | -28.6 <sup>a</sup>  | 17.1   | 0.3    | 1.3    | -35.6  | -29.3  | -5.0   | -24.9  | -24.9  | -24.9  | -23.7  | -23.7  | -23.8  | -23.8  | -23.8  |
| n        | -107.0 <sup>a</sup> | -63.4  | -64.6  | -93.4  | -100.0 | -99.2  | -94.6  | -100.8 | -100.8 | -100.8 | -92.4  | -92.4  | -92.4  | -92.4  | -92.4  |
| c2h2     | -209.2 <sup>a</sup> | -178.3 | -187.4 | -195.1 | -182.4 | -183.9 | -209.9 | -201.4 | -201.4 | -201.2 | -200.8 | -200.5 | -200.6 | -200.6 | -200.6 |
| c2h4     | -172.3 <sup>a</sup> | -145.7 | -148.6 | -166.8 | -160.2 | -164.0 | -173.6 | -162.9 | -162.5 | -162.8 | -166.6 | -166.3 | -166.4 | -166.4 | -166.4 |
| ch4      | -166.7 <sup>a</sup> | -129.8 | -125.3 | -152.7 | -149.3 | -155.0 | -164.8 | -161.4 | -161.1 | -161.2 | -160.0 | -159.7 | -159.8 | -159.8 | -159.8 |
| ch2-trip | -128.0 <sup>a</sup> | -109.8 | -107.6 | -129.1 | -119.8 | -119.9 | -116.6 | -106.3 | -106.2 | -106.2 | -109.6 | -109.7 | -109.5 | -109.5 | -109.5 |
| t-hcoh   | -80.3 <sup>a</sup>  | -69.3  | -61.2  | -80.9  | -80.8  | -83.5  | -101.3 | -93.6  | -93.3  | -93.4  | -92.7  | -92.5  | -92.4  | -92.4  | -92.4  |
| ch2c     | -86.2 <sup>a</sup>  | -46.0  | -55.4  | -72.3  | -69.6  | -76.3  | -104.3 | -98.6  | -98.4  | -98.5  | -93.0  | -92.8  | -92.8  | -92.8  | -92.8  |
| oxirene  | -80.7 <sup>a</sup>  | -53.9  | -48.5  | -72.4  | -84.5  | -85.0  | -77.6  | -63.9  | -63.6  | -63.6  | -62.6  | -62.4  | -62.0  | -62.0  | -62.0  |
| c2h4     | -146.0 <sup>a</sup> | -118.0 | -117.1 | -129.7 | -131.0 | -134.5 | -144.3 | -132.9 | -132.5 | -132.6 | -129.6 | -129.3 | -129.2 | -129.2 | -129.2 |
| cf2      | -97.9 <sup>a</sup>  | -104.2 | -98.9  | -99.2  | -107.2 | -119.2 | -118.5 | -111.1 | -110.9 | -111.0 | -107.8 | -107.7 | -107.6 | -107.6 | -107.6 |
| hco      | -8.4 <sup>a</sup>   | -40.7  | -39.5  | -36.2  | -36.6  | -39.2  | -35.2  | -32.6  | -32.4  | -32.4  | -33.9  | -33.8  | -33.7  | -33.7  | -33.7  |
| ch2-trip | -75.8 <sup>a</sup>  | -60.9  | -58.6  | -78.1  | -80.2  | -76.0  | -73.7  | -64.7  | -64.5  | -64.5  | -65.6  | -65.6  | -65.4  | -65.4  | -65.4  |
| ch       | -64.5 <sup>a</sup>  | -34.4  | -30.6  | -35.5  | -42.6  | -50.1  | -57.8  | -49.1  | -49.1  | -49.1  | -47.6  | -47.5  | -47.5  | -47.5  | -47.5  |
| co       | -129.3 <sup>a</sup> | -105.6 | -99.2  | -126.2 | -112.9 | -122.3 | -141.0 | -129.8 | -129.6 | -129.7 | -123.7 | -123.6 | -123.6 | -123.6 | -123.6 |
| ch       | 47.9 <sup>a</sup>   | 70.2   | 61.1   | 74.0   | 44.7   | 46.8   | 58.0   | 57.6   | 57.6   | 57.6   | 46.2   | 46.2   | 46.2   | 46.2   | 46.2   |
| o2       | -233.1 <sup>a</sup> | -246.4 | -246.5 | -250.1 | -249.9 | -237.8 | -258.4 | -225.0 | -225.0 | -225.0 | -241.4 | -241.3 | -241.3 | -241.3 | -241.3 |
| h2o      | -223.6 <sup>a</sup> | -215.6 | -208.2 | -205.4 | -215.8 | -217.6 | -224.1 | -213.5 | -213.3 | -213.4 | -214.8 | -214.6 | -214.7 | -214.7 | -214.7 |
| oh       | -191.4 <sup>a</sup> | -178.3 | -179.5 | -187.0 | -180.8 | -187.5 | -196.0 | -180.6 | -180.6 | -180.6 | -184.5 | -184.5 | -184.5 | -184.5 | -184.5 |
| h2       | -136.2 <sup>a</sup> | -107.0 | -115.4 | -146.3 | -157.4 | -164.2 | -137.8 | -132.1 | -132.1 | -132.1 | -129.3 | -129.3 | -129.3 | -129.4 | -129.4 |
| nh2      | -67.4 <sup>a</sup>  | -35.5  | -49.0  | -44.6  | -71.1  | -66.4  | -48.5  | -53.4  | -53.3  | -53.2  | -56.1  | -56.1  | -55.9  | -55.9  | -55.9  |
| ch2ch    | -4.9 <sup>a</sup>   | -27.9  | -28.7  | -20.8  | -24.3  | -28.3  | -16.4  | -17.1  | -16.8  | -16.9  | -18.5  | -18.2  | -18.2  | -18.2  | -18.2  |
| ccch     | -0.4 <sup>a</sup>   | 19.0   | 18.3   | 27.5   | -8.9   | -11.9  | 4.7    | -5.3   | -5.1   | -5.2   | -15.9  | -15.9  | -15.9  | -15.9  | -15.9  |

. . . continued on next page . . .

Table S19: . . . continued from previous page . . .

| Species  | Ref.                | MNDO   | AM1    | PM3    | PM6    | PM7    | OM1    |        | OM2    |        | OM3    |        | OM3    |        | D3T    |
|----------|---------------------|--------|--------|--------|--------|--------|--------|--------|--------|--------|--------|--------|--------|--------|--------|
|          |                     |        |        |        |        |        | D2     | D3     | D2     | D3     | D2     | D3     | D2     | D3     |        |
| cf       | -6.7 <sup>a</sup>   | -28.8  | -26.7  | -13.1  | -10.3  | -11.3  | -10.4  | -10.1  | -10.0  | -10.0  | -10.4  | -10.3  | -10.3  | -10.3  | -10.3  |
| f        | -93.7 <sup>a</sup>  | -138.0 | -91.8  | -79.0  | -104.4 | -91.5  | -112.8 | -102.1 | -102.1 | -102.2 | -104.1 | -104.1 | -104.2 | -104.2 | -104.2 |
| o        | -138.9 <sup>a</sup> | -109.5 | -106.5 | -129.2 | -116.3 | -126.1 | -136.1 | -133.0 | -133.0 | -133.1 | -127.3 | -127.3 | -127.3 | -127.3 | -127.3 |
| n        | 47.1 <sup>a</sup>   | 64.2   | 46.7   | 53.4   | 5.7    | 14.1   | 60.1   | 51.4   | 51.3   | 51.3   | 34.1   | 34.1   | 34.1   | 34.1   | 34.1   |
| f2o      | -94.2 <sup>a</sup>  | -153.0 | -130.8 | -118.5 | -80.3  | -93.1  | -118.4 | -96.1  | -95.9  | -96.0  | -109.4 | -109.4 | -109.5 | -109.5 | -109.5 |
| of       | -71.1 <sup>a</sup>  | -128.7 | -105.9 | -91.6  | -46.2  | -61.2  | -93.3  | -81.2  | -81.1  | -81.1  | -87.2  | -87.1  | -87.1  | -87.1  | -87.1  |
| f2       | -98.0 <sup>a</sup>  | -130.5 | -146.6 | -114.4 | -89.7  | -110.6 | -111.0 | -92.6  | -92.5  | -92.6  | -103.8 | -103.7 | -103.8 | -103.8 | -103.8 |
| hf       | -135.7 <sup>a</sup> | -169.5 | -159.5 | -131.6 | -131.0 | -136.2 | -160.1 | -132.4 | -132.4 | -132.4 | -145.8 | -145.7 | -145.7 | -145.7 | -145.7 |
| f        | -99.7 <sup>a</sup>  | -130.7 | -120.4 | -102.2 | -106.6 | -106.2 | -124.5 | -100.6 | -100.6 | -100.6 | -110.3 | -110.3 | -110.4 | -110.4 | -110.4 |
| no       | -77.6 <sup>a</sup>  | -107.6 | -95.0  | -81.8  | -50.4  | -64.2  | -94.1  | -71.0  | -70.9  | -70.9  | -83.7  | -83.6  | -83.5  | -83.5  | -83.5  |
| o2       | -121.4 <sup>a</sup> | -108.5 | -99.4  | -98.1  | -75.4  | -80.7  | -117.8 | -114.9 | -114.8 | -114.8 | -106.6 | -106.6 | -106.4 | -106.4 | -106.4 |
| n2       | -110.4 <sup>a</sup> | -134.5 | -126.8 | -105.4 | -71.1  | -84.0  | -131.7 | -111.7 | -111.6 | -111.5 | -121.7 | -121.6 | -121.5 | -121.5 | -121.5 |
| hno      | -46.0 <sup>a</sup>  | -70.2  | -68.8  | -65.6  | -37.5  | -46.1  | -68.5  | -51.6  | -51.5  | -51.5  | -63.7  | -63.6  | -63.5  | -63.5  | -63.5  |
| hoo      | -91.4 <sup>a</sup>  | -66.6  | -61.2  | -81.3  | -43.9  | -50.3  | -89.2  | -96.8  | -96.6  | -96.6  | -77.6  | -77.5  | -77.4  | -77.4  | -77.4  |
| hco      | -73.2 <sup>a</sup>  | -91.4  | -86.6  | -89.1  | -51.8  | -56.5  | -103.6 | -104.2 | -104.1 | -104.1 | -90.4  | -90.3  | -90.1  | -90.1  | -90.1  |
| hno      | 47.5 <sup>a</sup>   | 33.6   | 21.6   | 45.9   | 40.8   | 34.8   | 27.3   | 23.6   | 23.8   | 23.8   | 14.1   | 14.2   | 14.4   | 14.4   | 14.4   |
| hcn      | -31.4 <sup>a</sup>  | -68.4  | -67.1  | -51.7  | -33.4  | -40.0  | -64.8  | -58.8  | -58.7  | -58.7  | -57.6  | -57.6  | -57.3  | -57.3  | -57.3  |
| oh       | -129.8 <sup>a</sup> | -111.3 | -107.3 | -109.3 | -87.2  | -92.5  | -122.1 | -125.0 | -125.0 | -125.0 | -106.0 | -106.0 | -105.9 | -105.9 | -105.9 |
| o        | -75.7 <sup>a</sup>  | -47.0  | -46.4  | -52.1  | -41.3  | -43.5  | -65.1  | -76.2  | -76.2  | -76.3  | -57.8  | -57.8  | -57.9  | -57.9  | -57.9  |
| c2h2     | -102.2 <sup>a</sup> | -114.8 | -122.8 | -101.7 | -82.5  | -84.8  | -115.3 | -100.6 | -100.3 | -100.4 | -108.2 | -108.2 | -108.2 | -108.2 | -108.2 |
| c2h4     | -65.3 <sup>a</sup>  | -82.3  | -84.1  | -73.4  | -60.2  | -64.8  | -79.0  | -62.2  | -61.8  | -62.0  | -74.2  | -73.9  | -73.9  | -73.9  | -73.9  |
| ch4      | -59.7 <sup>a</sup>  | -66.3  | -60.7  | -59.3  | -49.4  | -55.9  | -70.1  | -60.6  | -60.3  | -60.4  | -67.7  | -67.4  | -67.3  | -67.3  | -67.3  |
| h2o      | -91.8 <sup>a</sup>  | -60.5  | -74.8  | -55.9  | -79.4  | -82.3  | -65.5  | -68.3  | -68.2  | -68.2  | -77.7  | -77.6  | -77.6  | -77.6  | -77.6  |
| ch2-trip | -21.0 <sup>a</sup>  | -46.3  | -43.0  | -35.7  | -19.9  | -20.7  | -22.0  | -5.5   | -5.4   | -5.4   | -17.2  | -17.3  | -17.1  | -17.1  | -17.1  |
| t-hcoH   | 26.7 <sup>a</sup>   | -5.9   | 3.4    | 12.6   | 19.2   | 15.7   | -6.6   | 7.2    | 7.5    | 7.4    | 0.3    | 0.1    | 0.0    | 0.0    | 0.0    |
| hooh     | 51.5 <sup>a</sup>   | 85.8   | 72.2   | 68.6   | 55.6   | 51.8   | 57.4   | 51.6   | 51.9   | 51.8   | 44.3   | 44.5   | 44.7   | 44.7   | 44.7   |
| ch2c     | 20.8 <sup>a</sup>   | 17.5   | 9.2    | 21.1   | 30.3   | 22.8   | -9.6   | 2.1    | 2.4    | 2.3    | -0.6   | -0.5   | -0.4   | -0.4   | -0.4   |
| h2co     | -22.6 <sup>a</sup>  | -10.1  | -24.9  | -9.9   | -11.7  | -15.4  | -24.3  | -27.7  | -27.5  | -27.5  | -30.9  | -30.8  | -30.6  | -30.6  | -30.6  |
| oxitrene | 26.3 <sup>a</sup>   | 9.5    | 16.1   | 21.0   | 15.4   | 14.2   | 17.0   | 36.8   | 37.2   | 37.2   | 29.8   | 30.0   | 30.4   | 30.4   | 30.4   |
| formic   | -48.1 <sup>a</sup>  | -12.1  | -34.6  | -13.6  | -48.0  | -42.7  | -29.2  | -26.9  | -26.5  | -26.6  | -32.3  | -32.0  | -31.8  | -31.8  | -31.8  |
| methanol | -17.0 <sup>a</sup>  | 1.7    | -14.0  | 7.4    | -17.8  | -14.9  | -5.4   | -5.2   | -4.8   | -4.8   | -10.5  | -10.3  | -9.9   | -9.9   | -9.9   |
| c2h4     | -39.0 <sup>a</sup>  | -54.5  | -52.5  | -36.3  | -31.0  | -35.3  | -49.7  | -32.1  | -31.7  | -31.8  | -37.2  | -37.0  | -36.8  | -36.8  | -36.8  |
| cf2      | 9.1 <sup>a</sup>    | -40.7  | -34.3  | -5.8   | -7.2   | -20.0  | -23.8  | -10.3  | -10.1  | -10.2  | -15.5  | -15.4  | -15.2  | -15.2  | -15.2  |
| f2o      | 145.5 <sup>a</sup>  | 195.3  | 159.2  | 153.6  | 137.1  | 136.1  | 153.8  | 138.2  | 138.4  | 138.3  | 138.4  | 138.5  | 138.7  | 138.7  | 138.7  |
| ch2-trip | 31.2 <sup>a</sup>   | 2.5    | 6.0    | 15.3   | 19.7   | 23.2   | 20.9   | 36.1   | 36.2   | 36.2   | 26.8   | 26.8   | 27.0   | 27.0   | 27.0   |
| h2o      | -39.7 <sup>a</sup>  | -11.6  | -25.8  | -5.0   | -39.8  | -38.5  | -22.6  | -26.7  | -26.5  | -26.6  | -33.7  | -33.6  | -33.5  | -33.5  | -33.5  |
| ch       | 42.5 <sup>a</sup>   | 29.0   | 34.0   | 57.9   | 57.3   | 49.1   | 36.8   | 51.6   | 51.7   | 51.7   | 44.8   | 44.8   | 44.9   | 44.9   | 44.9   |
| co       | -22.3 <sup>a</sup>  | -42.2  | -34.6  | -32.8  | -12.9  | -23.1  | -46.4  | -29.0  | -28.9  | -28.9  | -31.3  | -31.2  | -31.1  | -31.1  | -31.1  |
| o2       | 88.0 <sup>a</sup>   | 84.5   | 72.2   | 97.7   | 67.8   | 73.6   | 84.6   | 79.2   | 79.3   | 79.2   | 72.3   | 72.4   | 72.4   | 72.4   | 72.4   |
| o        | 78.4 <sup>a</sup>   | 80.6   | 64.8   | 94.7   | 64.4   | 69.9   | 89.6   | 75.9   | 75.9   | 75.8   | 68.7   | 68.7   | 68.6   | 68.6   | 68.6   |
| c        | 107.0 <sup>a</sup>  | 63.4   | 64.6   | 93.4   | 100.0  | 99.2   | 94.6   | 100.8  | 100.8  | 100.8  | 92.4   | 92.4   | 92.4   | 92.4   | 92.4   |
| ch       | 0.7 <sup>a</sup>    | 6.1    | 14.5   | 20.6   | 39.0   | 32.6   | -2.0   | 6.2    | 6.3    | 6.3    | 12.1   | 12.1   | 12.1   | 12.1   | 12.1   |
| c        | -47.1 <sup>a</sup>  | -64.2  | -46.7  | -53.4  | -5.7   | -14.1  | -60.1  | -51.4  | -51.3  | -51.3  | -34.1  | -34.1  | -34.1  | -34.1  | -34.1  |
| hoo      | -95.0 <sup>a</sup>  | -140.1 | -124.0 | -101.4 | -83.2  | -90.4  | -119.3 | -99.5  | -99.4  | -99.4  | -107.6 | -107.5 | -107.5 | -107.5 | -107.5 |
| o2       | -126.1 <sup>a</sup> | -182.9 | -181.9 | -156.7 | -149.9 | -138.6 | -163.7 | -124.3 | -124.2 | -124.2 | -149.0 | -149.0 | -148.9 | -148.9 | -148.9 |

. . . continued on next page . . .

Table S19: . . . continued from previous page . . .

| Species  | Ref.                | MNDO   | AM1    | PM3    | PM6    | PM7    | OM1    |        | OM2    |        | OM3    |        | OM3    |        | D3T |
|----------|---------------------|--------|--------|--------|--------|--------|--------|--------|--------|--------|--------|--------|--------|--------|-----|
|          |                     |        |        |        |        |        | D2     | D3     | D2     | D3     | D2     | D3     | D2     | D3     |     |
| h2o      | -116.6 <sup>a</sup> | -152.2 | -143.6 | -112.0 | -115.8 | -118.4 | -129.5 | -112.7 | -112.6 | -112.6 | -122.4 | -122.2 | -122.2 | -122.2 |     |
| oh       | -84.4 <sup>a</sup>  | -114.8 | -114.9 | -93.6  | -80.8  | -88.3  | -101.4 | -79.9  | -79.8  | -79.8  | -92.1  | -92.1  | -92.1  | -92.1  |     |
| h2       | -29.3 <sup>a</sup>  | -43.5  | -50.8  | -52.9  | -57.4  | -65.0  | -43.1  | -31.4  | -31.3  | -31.4  | -37.0  | -36.9  | -37.0  | -37.0  |     |
| nh2      | -114.5 <sup>a</sup> | -99.7  | -95.7  | -98.0  | -76.8  | -80.5  | -108.6 | -104.7 | -104.6 | -104.6 | -90.3  | -90.2  | -90.0  | -90.0  |     |
| c2h4     | -39.8 <sup>a</sup>  | -9.4   | -26.1  | -8.3   | -38.7  | -40.3  | -33.9  | -34.4  | -34.1  | -34.2  | -40.2  | -40.1  | -40.0  | -40.0  |     |
| c2h6     | -32.9 <sup>a</sup>  | -8.1   | -21.4  | -10.1  | -30.6  | -30.6  | -24.9  | -27.4  | -27.0  | -27.0  | -34.6  | -34.3  | -34.0  | -34.0  |     |
| ch3f     | -30.4 <sup>c</sup>  | -9.6   | -24.8  | -9.9   | -29.3  | -25.1  | -22.2  | -30.0  | -29.7  | -29.7  | -33.8  | -33.6  | -33.4  | -33.4  |     |
| ch4      | -37.7 <sup>a</sup>  | -10.1  | -22.3  | -15.6  | -36.2  | -35.4  | -25.9  | -33.7  | -33.4  | -33.4  | -40.9  | -40.7  | -40.5  | -40.5  |     |
| ch3      | -43.1 <sup>a</sup>  | -26.1  | -34.9  | -20.3  | -42.7  | -42.4  | -28.8  | -34.4  | -34.2  | -34.2  | -38.7  | -38.7  | -38.4  | -38.4  |     |
| cf2      | -54.0 <sup>a</sup>  | -26.0  | -45.2  | -21.4  | -61.5  | -70.6  | -58.5  | -63.3  | -63.1  | -63.2  | -63.2  | -63.2  | -63.2  | -63.2  |     |
| ch2-trip | 33.4 <sup>a</sup>   | 41.0   | 32.4   | 43.9   | 18.4   | 22.9   | 40.4   | 38.5   | 38.7   | 38.6   | 28.8   | 28.8   | 29.0   | 29.0   |     |
| f2       | 38.4 <sup>a</sup>   | 105.5  | 46.9   | 45.0   | 54.6   | 45.5   | 66.7   | 55.9   | 56.0   | 55.9   | 50.1   | 50.1   | 50.1   | 50.1   |     |
| h2       | -100.1 <sup>a</sup> | -57.7  | -82.6  | -73.2  | -117.0 | -126.7 | -86.6  | -94.1  | -94.1  | -94.2  | -97.4  | -97.3  | -97.5  | -97.5  |     |
| f        | -48.6 <sup>a</sup>  | -3.8   | -18.2  | -20.9  | -39.5  | -34.7  | -35.7  | -36.1  | -36.1  | -36.2  | -43.7  | -43.7  | -43.8  | -43.8  |     |
| o        | -31.9 <sup>a</sup>  | -46.1  | -42.0  | -35.8  | -16.3  | -26.9  | -41.4  | -32.3  | -32.3  | -32.3  | -34.9  | -34.9  | -34.9  | -34.9  |     |
| ch3      | 62.0 <sup>a</sup>   | 65.3   | 63.2   | 48.9   | 65.0   | 55.3   | 70.8   | 67.8   | 68.0   | 67.9   | 66.8   | 66.9   | 67.1   | 67.1   |     |
| fo2      | -35.4 <sup>a</sup>  | -52.5  | -40.9  | -38.0  | -19.0  | -26.9  | -30.5  | -19.8  | -19.6  | -19.7  | -29.7  | -29.6  | -29.6  | -29.6  |     |
| f2o      | -62.2 <sup>a</sup>  | -106.9 | -88.8  | -82.6  | -64.0  | -66.2  | -76.9  | -63.8  | -63.6  | -63.7  | -74.7  | -74.5  | -74.5  | -74.5  |     |
| of       | -39.2 <sup>a</sup>  | -82.6  | -63.9  | -55.7  | -29.9  | -34.3  | -51.9  | -48.9  | -48.8  | -48.8  | -52.3  | -52.2  | -52.2  | -52.2  |     |
| of       | -12.4 <sup>a</sup>  | -28.2  | -16.0  | -11.1  | 15.1   | 5.0    | -5.4   | -4.9   | -4.8   | -4.8   | -7.3   | -7.3   | -7.2   | -7.2   |     |
| f2       | -66.1 <sup>a</sup>  | -84.4  | -104.6 | -78.5  | -73.4  | -83.7  | -69.6  | -60.4  | -60.2  | -60.3  | -68.9  | -68.8  | -68.8  | -68.8  |     |
| hf       | -103.8 <sup>a</sup> | -123.4 | -117.5 | -95.7  | -114.7 | -109.4 | -118.7 | -100.1 | -100.1 | -100.1 | -110.9 | -110.8 | -110.8 | -110.8 |     |
| f        | -67.8 <sup>a</sup>  | -84.6  | -78.4  | -66.3  | -90.3  | -79.3  | -83.1  | -68.3  | -68.3  | -68.3  | -75.4  | -75.4  | -75.5  | -75.5  |     |
| no       | -45.7 <sup>a</sup>  | -61.5  | -53.0  | -46.0  | -34.1  | -37.3  | -52.7  | -38.7  | -38.6  | -38.6  | -48.8  | -48.6  | -48.6  | -48.6  |     |
| hno      | -14.1 <sup>a</sup>  | -24.1  | -26.8  | -29.7  | -21.2  | -19.2  | -27.1  | -19.4  | -19.2  | -19.2  | -28.8  | -28.5  | -28.5  | -28.5  |     |
| hoo      | -15.6 <sup>a</sup>  | -19.6  | -14.8  | -29.1  | -2.5   | -6.8   | -24.1  | -20.6  | -20.4  | -20.4  | -19.8  | -19.7  | -19.5  | -19.5  |     |
| hco      | 2.6 <sup>a</sup>    | -44.4  | -40.1  | -36.9  | -10.4  | -13.0  | -38.5  | -28.0  | -27.9  | -27.8  | -32.6  | -32.5  | -32.2  | -32.2  |     |
| hno      | -30.9 <sup>a</sup>  | -47.0  | -43.3  | -48.8  | -23.6  | -35.0  | -62.3  | -52.2  | -52.1  | -52.0  | -54.6  | -54.5  | -54.3  | -54.3  |     |
| hcn      | 0.5 <sup>a</sup>    | -22.3  | -25.1  | -15.9  | -17.1  | -13.1  | -23.4  | -26.6  | -26.4  | -26.4  | -22.7  | -22.7  | -22.4  | -22.4  |     |
| oh       | -54.1 <sup>a</sup>  | -64.2  | -60.9  | -57.2  | -45.8  | -49.0  | -57.0  | -48.8  | -48.7  | -48.7  | -48.2  | -48.1  | -48.1  | -48.1  |     |
| n        | 31.9 <sup>a</sup>   | 46.1   | 42.0   | 35.8   | 16.3   | 26.9   | 41.4   | 32.3   | 32.3   | 32.3   | 34.9   | 34.9   | 34.9   | 34.9   |     |
| c2h2     | -70.3 <sup>a</sup>  | -68.7  | -80.8  | -65.8  | -66.1  | -57.9  | -73.9  | -68.3  | -68.1  | -68.1  | -73.6  | -73.3  | -73.2  | -73.2  |     |
| c2h4     | -33.4 <sup>c</sup>  | -36.2  | -42.1  | -37.6  | -43.9  | -37.9  | -37.6  | -29.9  | -29.5  | -29.7  | -39.3  | -39.1  | -39.0  | -39.0  |     |
| ch4      | -27.7 <sup>a</sup>  | -20.2  | -18.8  | -23.5  | -33.0  | -29.0  | -28.7  | -28.4  | -28.0  | -28.1  | -32.8  | -32.5  | -32.4  | -32.4  |     |
| h2o      | -170.2 <sup>a</sup> | -141.1 | -139.6 | -150.6 | -143.8 | -152.1 | -155.1 | -144.2 | -144.1 | -144.0 | -146.4 | -146.4 | -146.2 | -146.2 |     |
| ch2-trip | 10.9 <sup>a</sup>   | -0.2   | -1.1   | 0.2    | -3.5   | 6.2    | 19.4   | 26.8   | 26.8   | 26.9   | 17.7   | 17.6   | 17.9   | 17.9   |     |
| t-hco    | 58.6 <sup>a</sup>   | 40.2   | 45.3   | 48.4   | 35.5   | 42.6   | 34.8   | 39.4   | 39.7   | 39.7   | 34.6   | 34.7   | 35.0   | 35.0   |     |
| hooh     | -26.9 <sup>a</sup>  | 5.2    | 7.4    | -26.1  | -8.8   | -18.0  | -32.3  | -24.3  | -24.0  | -24.0  | -24.4  | -24.3  | -23.9  | -23.9  |     |
| ch2c     | 52.7 <sup>a</sup>   | 63.6   | 51.2   | 57.0   | 46.7   | 49.7   | 31.8   | 34.3   | 34.6   | 34.6   | 34.3   | 34.4   | 34.5   | 34.5   |     |
| h2co     | -100.9 <sup>a</sup> | -90.7  | -89.7  | -104.6 | -76.1  | -85.2  | -113.9 | -103.6 | -103.4 | -103.4 | -99.6  | -99.5  | -99.2  | -99.2  |     |
| oxirene  | 58.2 <sup>a</sup>   | 55.6   | 58.0   | 56.9   | 31.8   | 41.1   | 58.4   | 69.1   | 69.5   | 69.5   | 64.7   | 64.9   | 65.3   | 65.3   |     |
| formic   | -126.5 <sup>a</sup> | -92.7  | -99.5  | -108.3 | -112.3 | -112.6 | -118.8 | -102.8 | -102.4 | -102.4 | -101.0 | -100.7 | -100.4 | -100.4 |     |
| methanol | -95.4 <sup>a</sup>  | -78.9  | -78.9  | -87.3  | -82.2  | -84.7  | -95.0  | -81.1  | -80.7  | -80.6  | -79.2  | -79.0  | -78.6  | -78.6  |     |
| c2h4     | -7.1 <sup>a</sup>   | -8.4   | -10.5  | -0.4   | -14.7  | -8.4   | -8.2   | 0.2    | 0.6    | 0.5    | -2.4   | -2.1   | -1.9   | -1.9   |     |
| cf2      | 41.0 <sup>a</sup>   | 5.4    | 7.6    | 30.0   | 9.1    | 6.9    | 17.6   | 21.9   | 22.2   | 22.1   | 19.4   | 19.5   | 19.7   | 19.7   |     |

. . . continued on next page . . .



Table S19: . . . continued from previous page . . .

| Species  | Ref.                | MNDO   | AM1    | PM3    | PM6    | PM7    | OM1    |        | OM2    |        | OM3    |        | OM3    |        | D3T    |
|----------|---------------------|--------|--------|--------|--------|--------|--------|--------|--------|--------|--------|--------|--------|--------|--------|
|          |                     |        |        |        |        |        | D2     | D3     | D2     | D3     | D2     | D3     | D2     | D3     |        |
| f2o      | 67.1 <sup>a</sup>   | 114.7  | 94.3   | 58.9   | 72.7   | 66.3   | 64.2   | 62.3   | 62.5   | 62.5   | 62.5   | 69.7   | 69.8   | 70.0   | 70.0   |
| hco      | 71.2 <sup>a</sup>   | 69.1   | 62.4   | 43.8   | 66.1   | 61.7   | 58.6   | 56.7   | 56.9   | 56.9   | 56.9   | 56.4   | 56.5   | 56.6   | 56.6   |
| ch2-trip | 63.1 <sup>a</sup>   | 48.6   | 48.0   | 51.1   | 36.1   | 50.1   | 62.3   | 68.4   | 68.5   | 68.5   | 68.5   | 61.6   | 61.7   | 61.9   | 61.9   |
| h2o      | -118.0 <sup>a</sup> | -92.2  | -90.6  | -99.7  | -104.2 | -108.3 | -112.2 | -102.6 | -102.4 | -102.4 | -102.4 | -102.4 | -102.3 | -102.2 | -102.2 |
| ch       | 74.4 <sup>a</sup>   | 75.1   | 75.9   | 93.8   | 73.7   | 76.0   | 78.2   | 83.9   | 84.0   | 84.0   | 84.0   | 79.7   | 79.7   | 79.8   | 79.8   |
| co       | 9.6 <sup>a</sup>    | 3.9    | 7.4    | 3.0    | 3.4    | 3.8    | -5.0   | 3.3    | 3.4    | 3.4    | 3.4    | 3.6    | 3.7    | 3.8    | 3.8    |
| c        | 138.9 <sup>a</sup>  | 109.5  | 106.5  | 129.2  | 116.3  | 126.1  | 136.1  | 133.0  | 133.0  | 133.1  | 133.1  | 127.3  | 127.3  | 127.3  | 127.3  |
| ch       | 76.5 <sup>a</sup>   | 53.1   | 60.9   | 72.7   | 80.3   | 76.1   | 63.1   | 82.4   | 82.6   | 82.6   | 82.6   | 69.8   | 69.9   | 70.0   | 70.0   |
| n        | -78.4 <sup>a</sup>  | -80.6  | -64.8  | -94.7  | -64.4  | -69.9  | -89.6  | -75.9  | -75.9  | -75.8  | -75.8  | -68.7  | -68.7  | -68.6  | -68.6  |
| c        | 28.6 <sup>a</sup>   | -17.1  | -0.3   | -1.3   | 35.6   | 29.3   | 5.0    | 24.9   | 24.9   | 24.9   | 24.9   | 23.7   | 23.7   | 23.8   | 23.8   |
| hoo      | -63.1 <sup>a</sup>  | -93.9  | -82.1  | -65.5  | -66.8  | -63.5  | -77.8  | -67.3  | -67.1  | -67.1  | -67.1  | -72.7  | -72.6  | -72.5  | -72.5  |
| o2       | -94.2 <sup>a</sup>  | -136.8 | -140.0 | -120.8 | -133.6 | -111.7 | -122.3 | -92.0  | -91.9  | -91.9  | -91.9  | -114.1 | -114.1 | -114.0 | -114.0 |
| h2o      | -84.7 <sup>a</sup>  | -106.1 | -101.7 | -76.1  | -99.5  | -91.5  | -88.1  | -80.5  | -80.3  | -80.3  | -80.3  | -87.5  | -87.4  | -87.3  | -87.3  |
| oh       | -52.5 <sup>a</sup>  | -68.7  | -72.9  | -57.8  | -64.5  | -61.4  | -59.9  | -47.6  | -47.5  | -47.5  | -47.5  | -57.2  | -57.2  | -57.1  | -57.1  |
| h2       | 2.7 <sup>a</sup>    | 2.6    | -8.8   | -17.1  | 41.0   | -38.2  | -1.7   | 0.9    | 0.9    | 0.9    | 0.9    | -2.1   | -2.1   | -2.0   | -2.0   |
| nh2      | -38.8 <sup>a</sup>  | -52.6  | -49.2  | -45.9  | -35.5  | -37.1  | -43.5  | -28.5  | -28.4  | -28.3  | -28.3  | -32.5  | -32.4  | -32.1  | -32.1  |
| c2h4     | -118.2 <sup>a</sup> | -90.0  | -90.9  | -103.0 | -103.0 | -110.2 | -123.5 | -110.3 | -110.0 | -110.0 | -110.0 | -108.9 | -108.9 | -108.6 | -108.6 |
| c2h6     | -111.2 <sup>a</sup> | -88.6  | -86.2  | -104.8 | -94.9  | -100.4 | -114.6 | -103.3 | -102.9 | -102.8 | -102.8 | -103.4 | -103.0 | -102.6 | -102.7 |
| ch2ch    | 74.7 <sup>a</sup>   | 81.8   | 73.3   | 59.2   | 78.4   | 72.5   | 77.4   | 72.2   | 72.5   | 72.4   | 72.4   | 71.8   | 72.1   | 72.1   | 72.1   |
| ch3f     | -108.8 <sup>a</sup> | -90.2  | -89.6  | -104.6 | -93.7  | -95.0  | -111.8 | -105.9 | -105.5 | -105.5 | -105.5 | -102.5 | -102.3 | -102.0 | -102.0 |
| ch4      | -116.0 <sup>a</sup> | -90.7  | -87.1  | -110.3 | -100.5 | -105.3 | -115.5 | -109.6 | -109.3 | -109.3 | -109.3 | -109.6 | -109.4 | -109.1 | -109.1 |
| ch3      | -121.5 <sup>a</sup> | -106.7 | -99.7  | -115.0 | -107.0 | -112.3 | -118.4 | -110.3 | -110.1 | -110.0 | -110.0 | -107.5 | -107.4 | -107.1 | -107.1 |
| cf2      | -132.4 <sup>a</sup> | -106.6 | -110.0 | -116.1 | -125.9 | -140.4 | -148.1 | -139.2 | -139.0 | -139.1 | -139.1 | -132.1 | -132.0 | -131.9 | -131.9 |
| cch      | 79.2 <sup>a</sup>   | 128.8  | 120.3  | 107.5  | 93.8   | 89.0   | 98.5   | 84.0   | 84.2   | 84.1   | 84.1   | 74.4   | 74.4   | 74.5   | 74.5   |
| ch2-trip | -45.0 <sup>a</sup>  | -39.6  | -32.4  | -50.8  | -45.9  | -46.9  | -49.2  | -37.4  | -37.2  | -37.2  | -37.2  | -39.9  | -40.0  | -39.7  | -39.7  |
| f2       | -40.0 <sup>a</sup>  | 24.9   | -17.9  | -49.7  | -9.8   | -24.3  | -23.0  | -20.0  | -19.9  | -19.9  | -19.9  | -18.6  | -18.6  | -18.5  | -18.5  |
| cf       | 73.0 <sup>a</sup>   | 81.0   | 75.3   | 66.9   | 92.4   | 89.6   | 83.4   | 79.2   | 79.3   | 79.3   | 79.3   | 79.9   | 80.0   | 80.0   | 80.0   |
| h2       | -178.5 <sup>a</sup> | -138.3 | -147.4 | -167.9 | -181.3 | -196.5 | -176.3 | -170.0 | -170.0 | -170.0 | -170.0 | -166.2 | -166.0 | -166.1 | -166.1 |
| c        | 79.7 <sup>a</sup>   | 109.7  | 101.9  | 80.0   | 102.7  | 100.9  | 93.8   | 89.3   | 89.3   | 89.3   | 89.3   | 90.3   | 90.3   | 90.4   | 90.4   |
| f        | -127.0 <sup>a</sup> | -84.4  | -83.0  | -115.6 | -103.9 | -104.5 | -125.3 | -112.0 | -112.0 | -112.1 | -112.1 | -112.4 | -112.4 | -112.4 | -112.4 |
| f        | -14.0 <sup>a</sup>  | -28.3  | 10.2   | 1.1    | -1.8   | 9.4    | -18.9  | -12.8  | -12.8  | -12.8  | -12.8  | -13.8  | -13.8  | -13.9  | -13.9  |
| n        | 75.7 <sup>a</sup>   | 47.0   | 46.4   | 52.1   | 41.3   | 43.5   | 65.1   | 76.2   | 76.2   | 76.3   | 76.3   | 57.8   | 57.8   | 57.9   | 57.9   |
| ch3      | 76.0 <sup>a</sup>   | 93.6   | 53.0   | 47.8   | 66.8   | 45.9   | 89.8   | 80.6   | 80.8   | 80.7   | 80.7   | 80.7   | 80.8   | 80.9   | 80.9   |
| fo2      | -21.4 <sup>a</sup>  | -24.2  | -51.0  | -39.1  | -17.3  | -36.3  | -11.5  | -7.0   | -6.8   | -6.9   | -6.9   | -15.9  | -15.7  | -15.7  | -15.7  |
| f2o      | 5.5 <sup>a</sup>    | -22.3  | -10.4  | -16.3  | 26.3   | 13.1   | 6.2    | 4.4    | 4.7    | 4.6    | 4.6    | 0.7    | 0.9    | 0.9    | 0.9    |
| of       | 28.6 <sup>a</sup>   | 2.0    | 14.5   | 10.6   | 60.4   | 45.1   | 31.2   | 19.4   | 19.5   | 19.5   | 19.5   | 23.1   | 23.2   | 23.3   | 23.3   |
| o2       | -25.1 <sup>a</sup>  | -54.3  | -74.1  | -56.8  | -28.1  | -43.7  | -33.0  | -36.1  | -36.0  | -36.0  | -36.0  | -38.5  | -38.4  | -38.3  | -38.3  |
| of       | 1.7 <sup>a</sup>    | 0.1    | -26.2  | -12.2  | 16.9   | -4.4   | 13.5   | 7.9    | 8.0    | 8.0    | 8.0    | 6.5    | 6.6    | 6.6    | 6.6    |
| hf       | -36.1 <sup>a</sup>  | -38.8  | -39.1  | -29.4  | -24.4  | -30.0  | -35.6  | -31.8  | -31.8  | -31.8  | -31.8  | -35.4  | -35.4  | -35.3  | -35.3  |
| o        | 14.0 <sup>a</sup>   | 28.3   | -10.2  | -1.1   | 1.8    | -9.4   | 18.9   | 12.8   | 12.8   | 12.8   | 12.8   | 13.8   | 13.8   | 13.9   | 13.9   |
| no       | 22.1 <sup>a</sup>   | 23.1   | 25.4   | 20.4   | 56.1   | 42.1   | 30.4   | 29.6   | 29.7   | 29.7   | 29.7   | 26.6   | 26.7   | 26.9   | 26.9   |
| n2       | -10.7 <sup>a</sup>  | -3.8   | -6.4   | -3.2   | 35.5   | 22.3   | -7.2   | -11.1  | -11.0  | -10.9  | -10.9  | -11.4  | -11.3  | -11.1  | -11.1  |
| hno      | 53.7 <sup>a</sup>   | 60.5   | 51.6   | 36.6   | 69.1   | 60.2   | 56.0   | 48.9   | 49.1   | 49.1   | 49.1   | 46.6   | 46.7   | 46.9   | 46.9   |
| hno      | 96.1 <sup>a</sup>   | 37.4   | 39.7   | 66.8   | 80.3   | 69.5   | 63.0   | 59.8   | 60.0   | 60.0   | 60.0   | 57.8   | 57.9   | 58.2   | 58.2   |
| hcn      | 68.2 <sup>a</sup>   | 62.2   | 53.3   | 50.5   | 73.1   | 66.2   | 59.7   | 41.7   | 41.9   | 41.9   | 41.9   | 52.7   | 52.8   | 53.1   | 53.1   |

. . . continued on next page . . .

Table S19: . . . continued from previous page . . .

| Species  | Ref.               | MNDO  | AM1   | PM3   | PM6   | PM7   | OM1   |       | OM2   |       | OM3   |       | OM3   |       | D3T   |
|----------|--------------------|-------|-------|-------|-------|-------|-------|-------|-------|-------|-------|-------|-------|-------|-------|
|          |                    |       |       |       |       |       | D2    | D3    | D2    | D3    | D2    | D3    | D2    | D3    |       |
| n        | 99.7 <sup>a</sup>  | 130.7 | 120.4 | 102.2 | 106.6 | 106.2 | 124.5 | 100.6 | 100.6 | 100.6 | 110.3 | 110.3 | 110.3 | 110.4 | 110.4 |
| c2h2     | -2.5 <sup>a</sup>  | 15.9  | -2.4  | 0.5   | 24.1  | 21.5  | 9.2   | -0.1  | 0.2   | 0.2   | 1.9   | 2.1   | 2.1   | 2.2   | 2.2   |
| c2h4     | 34.4 <sup>a</sup>  | 48.4  | 36.3  | 28.8  | 46.4  | 41.5  | 45.5  | 38.4  | 38.4  | 38.6  | 36.1  | 36.4  | 36.4  | 36.5  | 36.5  |
| ch2      | 40.0 <sup>a</sup>  | 64.4  | 59.7  | 42.9  | 57.2  | 50.4  | 54.4  | 39.9  | 40.2  | 40.2  | 42.7  | 42.9  | 43.1  | 43.1  | 43.1  |
| h2o      | -43.2 <sup>a</sup> | -56.7 | -56.6 | -35.1 | -39.9 | -47.6 | -29.8 | -32.2 | -32.0 | -32.0 | -34.1 | -34.0 | -33.8 | -33.8 | -33.8 |
| ch2-trip | 78.7 <sup>a</sup>  | 84.3  | 77.4  | 66.5  | 86.7  | 85.6  | 102.5 | 95.0  | 95.0  | 95.2  | 93.1  | 93.0  | 93.3  | 93.3  | 93.3  |
| t-hcooh  | 126.3 <sup>a</sup> | 124.8 | 123.8 | 114.7 | 125.8 | 121.9 | 117.9 | 107.7 | 108.0 | 108.0 | 110.0 | 110.2 | 110.4 | 110.4 | 110.4 |
| hooh     | 100.1 <sup>a</sup> | 89.6  | 90.4  | 89.4  | 95.1  | 86.5  | 93.0  | 87.7  | 88.0  | 88.1  | 88.0  | 88.1  | 88.5  | 88.5  | 88.5  |
| ch2c     | 120.5 <sup>a</sup> | 148.1 | 129.6 | 123.3 | 136.9 | 129.1 | 114.9 | 102.7 | 102.9 | 102.9 | 109.7 | 109.8 | 110.0 | 110.0 | 110.0 |
| h2co     | 26.1 <sup>a</sup>  | -6.3  | -6.7  | 10.9  | 27.8  | 19.3  | 11.4  | 8.4   | 8.6   | 8.7   | 12.8  | 12.9  | 13.3  | 13.3  | 13.3  |
| oxirene  | 126.0 <sup>a</sup> | 140.2 | 136.5 | 123.2 | 122.0 | 120.4 | 141.5 | 137.4 | 137.8 | 137.8 | 140.1 | 140.3 | 140.8 | 140.8 | 140.8 |
| formic   | 0.5 <sup>a</sup>   | -8.3  | -16.4 | 7.3   | -8.4  | -8.0  | 6.5   | 9.2   | 9.6   | 9.6   | 11.4  | 11.7  | 12.0  | 12.0  | 12.0  |
| methanol | 31.6 <sup>a</sup>  | 5.5   | 4.2   | 28.3  | 21.7  | 19.8  | 30.3  | 31.0  | 31.4  | 31.4  | 33.2  | 33.4  | 33.9  | 33.9  | 33.9  |
| c2h4     | 60.7 <sup>a</sup>  | 76.1  | 67.9  | 65.9  | 75.6  | 70.9  | 74.8  | 68.4  | 68.9  | 68.8  | 73.1  | 73.3  | 73.6  | 73.6  | 73.6  |
| cf2      | 108.8 <sup>a</sup> | 89.9  | 86.1  | 96.4  | 99.3  | 86.2  | 100.7 | 90.2  | 90.4  | 90.4  | 94.9  | 94.9  | 95.2  | 95.2  | 95.2  |
| f2o      | 194.1 <sup>a</sup> | 199.1 | 177.3 | 174.4 | 176.6 | 170.8 | 189.5 | 174.3 | 174.5 | 174.6 | 182.1 | 182.2 | 182.5 | 182.5 | 182.5 |
| hco      | 85.3 <sup>a</sup>  | 97.4  | 52.3  | 42.8  | 67.8  | 52.3  | 77.5  | 69.6  | 69.8  | 69.7  | 70.2  | 70.3  | 70.5  | 70.5  | 70.5  |
| ch2-trip | 130.8 <sup>a</sup> | 133.2 | 126.4 | 117.5 | 126.3 | 129.4 | 145.4 | 136.7 | 136.8 | 136.8 | 137.1 | 137.1 | 137.4 | 137.4 | 137.4 |
| h2o      | 9.0 <sup>a</sup>   | -7.8  | -7.6  | 15.9  | -0.3  | -3.8  | 13.1  | 9.5   | 9.6   | 9.7   | 9.9   | 10.1  | 10.3  | 10.3  | 10.3  |
| ch       | 142.1 <sup>a</sup> | 159.7 | 154.4 | 160.1 | 163.9 | 155.3 | 161.3 | 152.2 | 152.3 | 152.3 | 155.1 | 155.2 | 155.3 | 155.3 | 155.3 |
| co       | 77.3 <sup>a</sup>  | 88.5  | 85.8  | 69.4  | 93.7  | 83.1  | 78.1  | 71.6  | 71.7  | 71.7  | 79.0  | 79.1  | 79.3  | 79.3  | 79.3  |
| o2       | 136.6 <sup>a</sup> | 88.3  | 90.4  | 118.6 | 107.3 | 108.3 | 120.3 | 115.3 | 115.4 | 115.4 | 116.0 | 116.0 | 116.2 | 116.2 | 116.2 |
| o        | 127.0 <sup>a</sup> | 84.4  | 83.0  | 115.6 | 103.9 | 104.5 | 125.3 | 112.0 | 112.0 | 112.1 | 112.4 | 112.4 | 112.4 | 112.4 | 112.4 |
| c        | 206.7 <sup>a</sup> | 194.1 | 185.0 | 195.6 | 206.6 | 205.4 | 219.1 | 201.3 | 201.3 | 201.4 | 202.7 | 202.7 | 202.8 | 202.8 | 202.8 |
| n        | 48.6 <sup>a</sup>  | 3.8   | 18.2  | 20.9  | 39.5  | 34.7  | 35.7  | 36.1  | 36.1  | 36.2  | 43.7  | 43.7  | 43.8  | 43.8  | 43.8  |
| hoo      | 4.7 <sup>a</sup>   | -9.4  | -3.7  | 0.8   | 23.4  | 15.8  | 5.2   | 1.0   | 1.2   | 1.2   | 2.7   | 2.8   | 2.9   | 2.9   | 2.9   |
| o2       | -26.5 <sup>a</sup> | -52.3 | -61.6 | -54.5 | -43.3 | -32.3 | -39.2 | -23.7 | -23.6 | -23.6 | -38.7 | -38.7 | -38.5 | -38.5 | -38.5 |
| h2o      | -17.0 <sup>a</sup> | -21.5 | -23.2 | -9.8  | -9.2  | -12.2 | -5.0  | -12.2 | -12.0 | -12.0 | -12.1 | -11.9 | -11.8 | -11.8 | -11.8 |
| h2       | 70.4 <sup>a</sup>  | 87.1  | 69.6  | 49.2  | 49.2  | 41.2  | 81.4  | 69.2  | 69.2  | 69.2  | 73.4  | 73.4  | 73.4  | 73.4  | 73.4  |
| c2h4     | 8.8 <sup>a</sup>   | -5.6  | -7.9  | 12.6  | 0.9   | -5.7  | 1.8   | 1.7   | 2.0   | 2.0   | 3.4   | 3.5   | 3.8   | 3.8   | 3.8   |
| c2h6     | 15.8 <sup>a</sup>  | -4.3  | -3.2  | 10.7  | 9.0   | 4.1   | 10.8  | 8.7   | 9.1   | 9.2   | 9.0   | 9.4   | 9.8   | 9.8   | 9.8   |
| ch2ch    | 88.8 <sup>a</sup>  | 110.1 | 63.1  | 58.2  | 80.1  | 63.1  | 96.3  | 85.0  | 85.3  | 85.2  | 85.6  | 85.9  | 86.0  | 86.0  | 86.0  |
| ch3f     | 18.2 <sup>a</sup>  | -5.8  | -6.6  | 10.9  | 10.2  | 9.6   | 13.5  | 6.1   | 6.5   | 6.5   | 9.9   | 10.1  | 10.5  | 10.5  | 10.5  |
| ch4      | 11.0 <sup>a</sup>  | -6.3  | -4.1  | 5.3   | 3.4   | -0.7  | 9.8   | 2.4   | 2.7   | 2.8   | 2.7   | 3.0   | 3.3   | 3.3   | 3.3   |
| ch3      | 5.5 <sup>a</sup>   | -22.3 | -16.7 | 0.6   | -3.1  | -7.7  | 6.9   | 1.7   | 2.0   | 2.0   | 4.9   | 4.9   | 5.4   | 5.4   | 5.4   |
| cf2      | -5.4 <sup>a</sup>  | -22.2 | -27.0 | -0.6  | -22.0 | -35.9 | -22.8 | -27.2 | -26.9 | -27.0 | -19.7 | -19.6 | -19.4 | -19.4 | -19.4 |
| cch      | 93.3 <sup>a</sup>  | 157.1 | 110.1 | 106.4 | 95.5  | 79.6  | 117.4 | 96.9  | 97.1  | 97.0  | 88.2  | 88.2  | 88.4  | 88.4  | 88.4  |
| ch2-trip | 82.1 <sup>a</sup>  | 44.8  | 50.6  | 64.7  | 57.9  | 57.6  | 76.1  | 74.6  | 74.8  | 74.8  | 72.4  | 72.4  | 72.8  | 72.8  | 72.8  |
| cf       | 87.0 <sup>a</sup>  | 109.3 | 65.1  | 65.9  | 94.1  | 80.2  | 102.4 | 92.0  | 92.1  | 92.1  | 93.8  | 93.8  | 93.9  | 93.9  | 93.9  |
| h2       | -51.5 <sup>a</sup> | -53.9 | -64.4 | -52.3 | -77.4 | -92.0 | -51.0 | -58.0 | -57.9 | -57.9 | -53.8 | -53.6 | -53.7 | -53.7 | -53.7 |
| c        | 93.7 <sup>a</sup>  | 138.0 | 91.8  | 79.0  | 104.4 | 91.5  | 112.8 | 102.1 | 102.1 | 102.2 | 104.1 | 104.1 | 104.2 | 104.2 | 104.2 |
| o        | 63.6 <sup>a</sup>  | 84.6  | 78.4  | 66.3  | 90.3  | 79.3  | 83.1  | 68.3  | 68.3  | 68.3  | 75.4  | 75.4  | 75.5  | 75.5  | 75.5  |
| ch3      | 67.6 <sup>a</sup>  | 84.6  | 71.5  | 52.4  | 52.0  | 54.8  | 74.7  | 72.4  | 72.5  | 72.5  | 73.0  | 73.1  | 73.2  | 73.2  | 73.2  |
| fo2      | -33.8 <sup>a</sup> | -33.2 | -32.5 | -34.5 | -32.0 | -27.4 | -26.6 | -15.2 | -15.1 | -15.1 | -23.5 | -23.4 | -23.4 | -23.4 | -23.4 |
| f2o      | -9.7 <sup>a</sup>  | -38.2 | -15.9 | -24.8 | 0.5   | -4.9  | -17.0 | -16.2 | -16.1 | -16.2 | -17.5 | -17.3 | -17.4 | -17.4 | -17.4 |

. . . continued on next page . . .

Table S19: . . . continued from previous page . . .

| Species  | Ref.               | MNDO  | AM1   | PM3   | PM6   | PM7   | OM1   |       | OM2   |       | OM3   |       | OM3   |       | OM3   |       | D3T   |
|----------|--------------------|-------|-------|-------|-------|-------|-------|-------|-------|-------|-------|-------|-------|-------|-------|-------|-------|
|          |                    |       |       |       |       |       | D2    | D3    | D2    | D3    | D2    | D3    | D2    | D3    |       |       |       |
| of       | 13.3 <sup>a</sup>  | -13.8 | 9.0   | 2.1   | 34.6  | 27.1  | 8.1   | -1.3  | -1.3  | -1.3  | 4.9   | 5.0   | 5.0   | 5.0   | 5.0   | 5.0   | 5.0   |
| o2       | -37.5 <sup>a</sup> | -63.3 | -55.6 | -52.2 | -42.9 | -34.7 | -48.1 | -44.3 | -44.3 | -44.3 | -46.1 | -46.1 | -46.0 | -46.0 | -46.0 | -46.0 | -46.0 |
| of       | -10.7 <sup>a</sup> | -8.9  | -7.6  | -7.6  | 2.1   | 4.6   | -1.6  | -0.3  | -0.3  | -0.3  | -1.1  | -1.1  | -1.1  | -1.1  | -1.1  | -1.1  | -1.1  |
| f2       | -13.6 <sup>a</sup> | -15.7 | -31.7 | -20.7 | -8.9  | -22.3 | -9.6  | -12.8 | -12.7 | -12.8 | -11.7 | -11.6 | -11.7 | -11.7 | -11.7 | -11.7 | -11.7 |
| hf       | -51.3 <sup>a</sup> | -54.6 | -44.6 | -37.9 | -50.2 | -48.0 | -58.7 | -52.6 | -52.5 | -52.6 | -53.6 | -53.6 | -53.7 | -53.7 | -53.7 | -53.7 | -53.7 |
| o        | 1.6 <sup>a</sup>   | 19.3  | 8.4   | 3.5   | -13.0 | -0.4  | 3.8   | 4.6   | 4.6   | 4.6   | 6.2   | 6.2   | 6.1   | 6.1   | 6.1   | 6.1   | 6.1   |
| f        | -15.2 <sup>a</sup> | -15.8 | -5.5  | -8.6  | -25.8 | -18.0 | -23.1 | -20.7 | -20.7 | -20.8 | -18.2 | -18.2 | -18.3 | -18.3 | -18.3 | -18.3 | -18.3 |
| no       | 6.8 <sup>a</sup>   | 7.3   | 19.9  | 11.8  | 30.4  | 24.1  | 7.2   | 8.9   | 8.9   | 9.0   | 8.4   | 8.5   | 8.6   | 8.6   | 8.6   | 8.6   | 8.6   |
| o2       | 8.4 <sup>a</sup>   | 2.7   | 7.9   | 11.3  | 11.7  | 11.7  | 4.3   | 10.1  | 10.1  | 10.1  | -0.6  | -0.5  | -0.5  | -0.5  | -0.5  | -0.5  | -0.5  |
| n2       | -26.0 <sup>a</sup> | -19.6 | -11.9 | -11.8 | 9.7   | 4.3   | -30.3 | -31.8 | -31.7 | -31.7 | -29.6 | -29.5 | -29.4 | -29.4 | -29.4 | -29.4 | -29.4 |
| no       | 19.4 <sup>a</sup>  | -23.2 | -19.4 | 3.9   | 16.0  | 8.5   | -9.6  | 13.3  | 13.4  | 13.4  | -15.6 | -15.6 | -15.5 | -15.5 | -15.5 | -15.5 | -15.5 |
| hno      | 38.4 <sup>a</sup>  | 44.6  | 46.1  | 28.1  | 43.3  | 42.2  | 32.8  | 28.2  | 28.3  | 28.3  | 28.4  | 28.5  | 28.6  | 28.6  | 28.6  | 28.6  | 28.6  |
| hno      | 56.6 <sup>a</sup>  | 19.8  | 20.8  | 20.3  | 35.4  | 36.0  | 18.5  | 20.8  | 20.9  | 20.9  | 15.6  | 15.7  | 15.8  | 15.8  | 15.8  | 15.8  | 15.8  |
| hcn      | 53.0 <sup>a</sup>  | 46.4  | 47.8  | 41.9  | 47.4  | 48.2  | 36.6  | 21.0  | 21.1  | 21.2  | 34.5  | 34.5  | 34.7  | 34.7  | 34.7  | 34.7  | 34.7  |
| o        | 54.1 <sup>a</sup>  | 64.2  | 60.9  | 57.2  | 45.8  | 49.0  | 57.0  | 48.8  | 48.7  | 48.7  | 48.2  | 48.2  | 48.1  | 48.1  | 48.1  | 48.1  | 48.1  |
| n        | 84.4 <sup>a</sup>  | 114.8 | 114.9 | 93.6  | 80.8  | 88.3  | 101.4 | 79.9  | 79.8  | 79.8  | 92.1  | 92.1  | 92.1  | 92.1  | 92.1  | 92.1  | 92.1  |
| c2h2     | -17.8 <sup>a</sup> | 0.0   | -7.9  | -8.0  | -1.7  | 3.5   | -13.9 | -20.7 | -20.5 | -20.6 | -16.3 | -16.1 | -16.1 | -16.1 | -16.1 | -16.1 | -16.1 |
| c2h4     | 19.1 <sup>a</sup>  | 32.6  | 30.8  | 20.2  | 20.6  | 23.5  | 22.4  | 17.7  | 18.1  | 17.8  | 17.9  | 18.2  | 18.1  | 18.1  | 18.1  | 18.1  | 18.1  |
| ch4      | 24.8 <sup>a</sup>  | 48.5  | 54.2  | 34.3  | 31.4  | 32.4  | 31.2  | 19.2  | 19.5  | 19.4  | 24.5  | 24.7  | 24.7  | 24.7  | 24.7  | 24.7  | 24.7  |
| h2o      | -82.7 <sup>a</sup> | -74.2 | -75.6 | -81.6 | -84.8 | -81.1 | -74.4 | -71.2 | -71.1 | -71.1 | -76.2 | -76.2 | -76.1 | -76.1 | -76.1 | -76.1 | -76.1 |
| ch2-trip | 63.4 <sup>a</sup>  | 68.5  | 71.9  | 57.9  | 60.9  | 67.6  | 79.4  | 74.4  | 74.4  | 74.4  | 74.9  | 74.8  | 75.0  | 75.0  | 75.0  | 75.0  | 75.0  |
| t-hcoh   | 111.1 <sup>a</sup> | 109.0 | 118.3 | 106.2 | 100.0 | 104.0 | 94.7  | 87.0  | 87.3  | 87.2  | 91.8  | 92.0  | 92.1  | 92.1  | 92.1  | 92.1  | 92.1  |
| hooh     | 60.6 <sup>a</sup>  | 72.1  | 71.4  | 42.9  | 50.2  | 53.0  | 48.5  | 48.7  | 48.9  | 48.9  | 45.8  | 45.9  | 46.2  | 46.2  | 46.2  | 46.2  | 46.2  |
| ch2c     | 105.2 <sup>a</sup> | 132.3 | 124.1 | 114.8 | 111.1 | 111.1 | 91.7  | 82.0  | 82.1  | 82.1  | 91.5  | 91.6  | 91.6  | 91.6  | 91.6  | 91.6  | 91.6  |
| h2co     | -13.4 <sup>a</sup> | -23.8 | -25.7 | -35.6 | -17.1 | -14.2 | -33.1 | -30.6 | -30.5 | -30.4 | -29.4 | -29.3 | -29.1 | -29.1 | -29.1 | -29.1 | -29.1 |
| oxirene  | 110.7 <sup>a</sup> | 124.4 | 131.0 | 114.7 | 96.2  | 102.4 | 118.4 | 116.7 | 117.0 | 117.0 | 121.9 | 122.1 | 122.4 | 122.4 | 122.4 | 122.4 | 122.4 |
| formic   | -39.0 <sup>a</sup> | -25.8 | -35.4 | -39.2 | -53.3 | -41.5 | -38.1 | -29.8 | -29.5 | -29.5 | -30.8 | -30.5 | -30.3 | -30.3 | -30.3 | -30.3 | -30.3 |
| methanol | -7.8 <sup>a</sup>  | -12.1 | -14.8 | -18.2 | -23.2 | -13.7 | -14.3 | -8.1  | -7.7  | -7.7  | -9.0  | -8.8  | -8.5  | -8.5  | -8.5  | -8.5  | -8.5  |
| c2h4     | 45.4 <sup>a</sup>  | 60.3  | 62.4  | 57.4  | 49.8  | 52.9  | 51.7  | 47.8  | 48.1  | 48.0  | 54.9  | 55.1  | 55.2  | 55.2  | 55.2  | 55.2  | 55.2  |
| cf2      | 93.5 <sup>a</sup>  | 74.1  | 80.6  | 87.8  | 73.6  | 68.2  | 77.5  | 69.5  | 69.7  | 69.7  | 76.7  | 76.7  | 76.9  | 76.9  | 76.9  | 76.9  | 76.9  |
| f2o      | 154.6 <sup>a</sup> | 181.6 | 158.4 | 127.9 | 131.7 | 137.3 | 145.0 | 135.3 | 135.4 | 135.4 | 139.9 | 140.0 | 140.1 | 140.1 | 140.1 | 140.1 | 140.1 |
| hco      | 72.9 <sup>a</sup>  | 88.4  | 70.8  | 47.4  | 53.1  | 61.2  | 62.4  | 61.4  | 61.5  | 61.5  | 62.6  | 62.7  | 62.8  | 62.8  | 62.8  | 62.8  | 62.8  |
| ch2-trip | 115.6 <sup>a</sup> | 117.4 | 120.9 | 108.9 | 100.5 | 111.4 | 122.3 | 116.0 | 116.1 | 116.1 | 118.9 | 118.9 | 119.0 | 119.0 | 119.0 | 119.0 | 119.0 |
| h2o      | -30.5 <sup>a</sup> | -25.4 | -26.5 | -30.6 | -45.2 | -37.3 | -31.4 | -29.6 | -29.5 | -29.5 | -32.2 | -32.1 | -32.1 | -32.1 | -32.1 | -32.1 | -32.1 |
| ch       | 126.9 <sup>a</sup> | 143.9 | 148.9 | 151.6 | 138.1 | 137.3 | 138.2 | 131.5 | 131.5 | 131.5 | 136.9 | 137.0 | 137.0 | 137.0 | 137.0 | 137.0 | 137.0 |
| co       | 62.1 <sup>a</sup>  | 72.7  | 80.3  | 60.8  | 67.9  | 65.2  | 55.0  | 50.9  | 50.9  | 50.9  | 60.8  | 60.9  | 60.9  | 60.9  | 60.9  | 60.9  | 60.9  |
| o2       | 97.1 <sup>a</sup>  | 70.8  | 71.5  | 72.1  | 62.4  | 74.8  | 75.8  | 76.3  | 76.3  | 76.3  | 73.8  | 73.9  | 73.9  | 73.9  | 73.9  | 73.9  | 73.9  |
| o        | 87.5 <sup>a</sup>  | 66.9  | 64.1  | 69.0  | 59.0  | 71.0  | 80.8  | 73.0  | 72.9  | 72.9  | 70.2  | 70.2  | 70.1  | 70.1  | 70.1  | 70.1  | 70.1  |
| c        | 191.4 <sup>a</sup> | 178.3 | 179.5 | 187.0 | 180.8 | 187.5 | 196.0 | 180.6 | 180.6 | 180.6 | 184.5 | 184.5 | 184.5 | 184.5 | 184.5 | 184.5 | 184.5 |
| ch       | 130.5 <sup>a</sup> | 117.3 | 121.8 | 129.9 | 126.2 | 125.1 | 120.1 | 131.2 | 131.3 | 131.2 | 118.0 | 118.1 | 118.1 | 118.1 | 118.1 | 118.1 | 118.1 |
| n        | 9.1 <sup>a</sup>   | -13.7 | -0.8  | -25.7 | -5.4  | 1.2   | -8.9  | -2.9  | -3.0  | -2.9  | 1.5   | 1.5   | 1.5   | 1.5   | 1.5   | 1.5   | 1.5   |
| c        | 82.7 <sup>a</sup>  | 47.1  | 60.7  | 55.9  | 81.4  | 78.3  | 62.0  | 73.6  | 73.6  | 73.6  | 71.9  | 71.9  | 71.8  | 71.8  | 71.8  | 71.8  | 71.8  |
| hoo      | -10.6 <sup>a</sup> | -25.2 | -9.2  | -7.7  | -2.4  | -2.2  | -17.9 | -19.7 | -19.6 | -19.6 | -15.5 | -15.4 | -15.4 | -15.4 | -15.4 | -15.4 | -15.4 |
| o2       | -41.7 <sup>a</sup> | -68.1 | -67.1 | -63.0 | -69.1 | -50.3 | -62.4 | -44.4 | -44.4 | -44.4 | -56.9 | -56.9 | -56.9 | -56.9 | -56.9 | -56.9 | -56.9 |
| h2o      | -32.2 <sup>a</sup> | -37.4 | -28.7 | -18.3 | -35.0 | -30.2 | -28.1 | -32.9 | -32.8 | -32.8 | -30.3 | -30.1 | -30.2 | -30.2 | -30.2 | -30.2 | -30.2 |

. . . continued on next page . . .

Table S19: . . . continued from previous page . . .

| Species  | Ref.               | MNDO  | AM1   | PM3   | PM6    | PM7    | OM1   |       | OM2   |       | OM3   |       | OM3   |       | D3T   |
|----------|--------------------|-------|-------|-------|--------|--------|-------|-------|-------|-------|-------|-------|-------|-------|-------|
|          |                    |       |       |       |        |        | D2    | D3    | D2    | D3    | D2    | D3    | D2    | D3    |       |
| h2       | 55.2 <sup>a</sup>  | 71.3  | 64.1  | 40.7  | 23.4   | 23.2   | 58.2  | 48.5  | 48.5  | 48.5  | 55.2  | 55.2  | 55.1  | 55.1  | 55.1  |
| nh2      | 15.3 <sup>a</sup>  | 11.6  | 11.7  | 11.3  | 10.4   | 11.9   | 13.5  | 20.3  | 20.3  | 20.4  | 15.8  | 15.8  | 15.9  | 15.9  | 15.9  |
| c2h4     | -30.7 <sup>a</sup> | -23.2 | -26.9 | -34.0 | -44.1  | -39.2  | -42.8 | -37.3 | -37.1 | -37.1 | -38.7 | -38.7 | -38.5 | -38.5 | -38.5 |
| c2h6     | -23.7 <sup>a</sup> | -21.8 | -22.1 | -35.8 | -36.0  | -29.4  | -33.8 | -30.3 | -30.0 | -29.9 | -32.8 | -32.8 | -32.6 | -32.6 | -32.6 |
| ch2ch    | 76.4 <sup>a</sup>  | 101.1 | 81.7  | 62.8  | 65.4   | 72.1   | 81.2  | 76.8  | 77.1  | 77.0  | 78.3  | 78.3  | 78.3  | 78.3  | 78.3  |
| ch3f     | -21.3 <sup>a</sup> | -23.3 | -25.5 | -35.6 | -34.7  | -23.9  | -31.1 | -32.9 | -32.6 | -32.6 | -32.3 | -32.3 | -31.9 | -31.9 | -31.9 |
| ch4      | -28.5 <sup>a</sup> | -23.8 | -23.0 | -41.2 | -41.6  | -34.2  | -34.8 | -36.6 | -36.4 | -36.3 | -39.4 | -39.4 | -39.0 | -39.0 | -39.0 |
| ch3      | -34.0 <sup>a</sup> | -39.8 | -35.7 | -45.9 | -48.0  | -41.2  | -37.6 | -37.3 | -37.1 | -37.1 | -37.3 | -37.3 | -37.0 | -37.0 | -37.0 |
| cf2      | -44.9 <sup>a</sup> | -39.7 | -45.9 | -47.1 | -66.9  | -69.4  | -67.4 | -66.2 | -66.0 | -66.1 | -61.8 | -61.8 | -61.8 | -61.8 | -61.8 |
| cch      | 80.9 <sup>a</sup>  | 148.1 | 128.6 | 111.0 | 80.8   | 88.6   | 102.4 | 88.7  | 88.8  | 88.7  | 80.6  | 80.6  | 80.6  | 80.6  | 80.6  |
| ch2-trip | 42.6 <sup>a</sup>  | 27.3  | 31.7  | 18.2  | 13.0   | 24.1   | 31.6  | 35.6  | 35.7  | 35.7  | 30.3  | 30.3  | 30.4  | 30.4  | 30.4  |
| f2       | 47.5 <sup>a</sup>  | 91.8  | 46.1  | 19.4  | 49.2   | 46.7   | 57.8  | 53.0  | 53.0  | 53.0  | 51.6  | 51.6  | 51.6  | 51.6  | 51.6  |
| cf       | 74.6 <sup>a</sup>  | 100.3 | 83.6  | 70.5  | 79.4   | 89.2   | 87.3  | 83.8  | 83.9  | 83.9  | 86.1  | 86.1  | 86.2  | 86.2  | 86.2  |
| h2       | -91.0 <sup>a</sup> | -71.4 | -83.3 | -98.8 | -122.3 | -125.5 | -95.5 | -97.0 | -97.0 | -97.1 | -95.9 | -95.8 | -96.0 | -96.0 | -96.0 |
| c        | 81.3 <sup>a</sup>  | 129.0 | 110.3 | 83.6  | 89.7   | 100.5  | 97.7  | 93.9  | 93.9  | 93.9  | 96.5  | 96.5  | 96.5  | 96.5  | 96.5  |
| f        | -39.5 <sup>a</sup> | -17.5 | -19.0 | -46.5 | -44.9  | -33.5  | -44.5 | -39.0 | -39.1 | -39.1 | -42.2 | -42.2 | -42.4 | -42.4 | -42.4 |
| f        | -12.4 <sup>a</sup> | -9.0  | 18.5  | 4.6   | -14.7  | 9.0    | -15.1 | -8.2  | -8.3  | -8.3  | -7.6  | -7.6  | -7.7  | -7.7  | -7.7  |
| o        | 52.5 <sup>a</sup>  | 68.7  | 72.9  | 57.8  | 64.5   | 61.4   | 59.9  | 47.6  | 47.5  | 47.5  | 57.2  | 57.2  | 57.1  | 57.1  | 57.1  |
| n        | 129.8 <sup>a</sup> | 111.3 | 107.3 | 109.3 | 87.2   | 92.5   | 122.1 | 125.0 | 125.0 | 125.0 | 106.0 | 106.0 | 105.9 | 105.9 | 105.9 |
| ch3      | 74.4 <sup>a</sup>  | 93.5  | 79.2  | 60.0  | 49.9   | 50.2   | 76.3  | 72.7  | 72.8  | 72.7  | 74.2  | 74.2  | 74.3  | 74.3  | 74.3  |
| fo2      | -23.1 <sup>a</sup> | -24.3 | -24.9 | -26.9 | -34.1  | -32.0  | -25.0 | -14.9 | -14.8 | -14.9 | -22.4 | -22.4 | -22.3 | -22.3 | -22.3 |
| o2       | -26.8 <sup>a</sup> | -54.4 | -47.9 | -44.6 | -45.0  | -39.3  | -46.5 | -44.0 | -44.0 | -44.0 | -45.0 | -45.0 | -45.0 | -45.0 | -45.0 |
| f2       | -26.9 <sup>a</sup> | -1.9  | -40.7 | -22.8 | -43.5  | -49.4  | -17.7 | -11.4 | -11.4 | -11.5 | -16.6 | -16.6 | -16.6 | -16.6 | -16.6 |
| hf       | -64.6 <sup>a</sup> | -40.8 | -53.6 | -40.0 | -84.8  | -75.1  | -66.8 | -51.2 | -51.3 | -51.3 | -58.6 | -58.6 | -58.6 | -58.6 | -58.6 |
| o        | 12.4 <sup>a</sup>  | -14.8 | -35.0 | -45.9 | -54.7  | -50.3  | -38.5 | -44.4 | -44.6 | -44.6 | -40.8 | -40.8 | -41.1 | -41.1 | -41.1 |
| f        | -28.6 <sup>a</sup> | -45.0 | -65.5 | -67.6 | -100.0 | -90.4  | -75.1 | -68.7 | -68.8 | -68.9 | -71.2 | -71.2 | -71.6 | -71.6 | -71.6 |
| no       | -6.5 <sup>a</sup>  | 21.1  | 10.9  | 9.8   | -4.2   | -3.0   | -0.8  | 10.2  | 10.2  | 10.3  | 3.5   | 3.5   | 3.6   | 3.6   | 3.6   |
| n2       | -39.3 <sup>a</sup> | -5.8  | -20.9 | -13.8 | -24.9  | -22.8  | -38.4 | -30.5 | -30.5 | -30.4 | -34.5 | -34.5 | -34.4 | -34.4 | -34.4 |
| hno      | 25.1 <sup>a</sup>  | 58.5  | 37.1  | 26.0  | 8.7    | 15.1   | 24.8  | 29.6  | 29.6  | 29.6  | 23.5  | 23.5  | 23.6  | 23.6  | 23.6  |
| hcn      | 39.7 <sup>a</sup>  | 60.2  | 38.8  | 39.8  | 12.8   | 21.1   | 28.5  | 22.4  | 22.4  | 22.5  | 29.6  | 29.6  | 29.8  | 29.8  | 29.8  |
| n        | 71.1 <sup>a</sup>  | 128.7 | 105.9 | 91.6  | 46.2   | 61.2   | 93.3  | 81.2  | 81.1  | 81.1  | 87.2  | 87.2  | 87.1  | 87.1  | 87.1  |
| c2h2     | -31.1 <sup>a</sup> | 13.9  | -16.9 | -10.1 | -36.3  | -23.6  | -22.0 | -19.4 | -19.3 | -19.3 | -21.3 | -21.3 | -21.1 | -21.1 | -21.1 |
| c2h4     | 5.8 <sup>a</sup>   | 46.4  | 21.8  | 18.1  | -14.0  | -3.6   | 14.3  | 19.0  | 19.3  | 19.1  | 13.0  | 13.0  | 13.2  | 13.2  | 13.2  |
| ch4      | 11.4 <sup>a</sup>  | 62.4  | 45.2  | 32.3  | -3.2   | 5.3    | 23.2  | 20.6  | 20.8  | 20.7  | 19.5  | 19.5  | 19.8  | 19.8  | 19.8  |
| ch2-trip | 50.1 <sup>a</sup>  | 82.3  | 62.9  | 55.9  | 26.4   | 40.5   | 71.3  | 75.7  | 75.6  | 75.7  | 70.0  | 70.0  | 70.0  | 70.0  | 70.0  |
| t-hcoh   | 97.8 <sup>a</sup>  | 122.8 | 109.3 | 104.1 | 65.4   | 76.8   | 86.7  | 88.4  | 88.5  | 88.5  | 86.9  | 86.9  | 87.1  | 87.1  | 87.1  |
| ch2c     | 91.9 <sup>a</sup>  | 146.1 | 115.1 | 112.7 | 76.5   | 84.0   | 83.7  | 83.3  | 83.4  | 83.4  | 86.6  | 86.6  | 86.7  | 86.7  | 86.7  |
| oxirene  | 97.4 <sup>a</sup>  | 138.2 | 121.9 | 112.6 | 61.6   | 75.3   | 110.3 | 118.0 | 118.3 | 118.4 | 117.0 | 117.0 | 117.5 | 117.5 | 117.5 |
| c2h4     | 32.1 <sup>a</sup>  | 74.1  | 53.4  | 55.3  | 15.2   | 25.8   | 43.6  | 49.1  | 49.4  | 49.3  | 50.0  | 50.0  | 50.3  | 50.3  | 50.3  |
| cf2      | 80.2 <sup>a</sup>  | 87.9  | 71.6  | 85.7  | 39.0   | 41.1   | 69.5  | 70.9  | 71.0  | 71.0  | 71.7  | 71.7  | 71.9  | 71.9  | 71.9  |
| hco      | 83.6 <sup>a</sup>  | 97.3  | 78.5  | 55.0  | 51.0   | 56.6   | 64.0  | 61.7  | 61.7  | 61.7  | 63.7  | 63.7  | 63.9  | 63.9  | 63.9  |
| ch2-trip | 102.3 <sup>a</sup> | 131.2 | 111.9 | 106.8 | 65.9   | 84.3   | 114.2 | 117.3 | 117.3 | 117.4 | 113.9 | 113.9 | 114.1 | 114.1 | 114.1 |
| ch       | 113.6 <sup>a</sup> | 157.7 | 139.8 | 149.5 | 103.5  | 110.2  | 130.1 | 132.8 | 132.8 | 132.8 | 132.0 | 132.0 | 132.0 | 132.0 | 132.0 |
| co       | 48.8 <sup>a</sup>  | 86.5  | 71.3  | 58.8  | 33.3   | 38.1   | 46.9  | 52.2  | 52.2  | 52.2  | 55.9  | 55.9  | 56.0  | 56.0  | 56.0  |
| c        | 178.1 <sup>a</sup> | 192.1 | 170.5 | 185.0 | 146.2  | 160.3  | 187.9 | 182.0 | 181.8 | 181.9 | 179.6 | 179.6 | 179.5 | 179.5 | 179.5 |

. . . continued on next page . . .

Table S19: ... continued from previous page ...

| Species                        | Ref.               | MNDO  | AM1   | PM3   | PM6    | PM7   | OM1   |       | OM2   |       | OM3   |       | OM3   |       | D3T   |
|--------------------------------|--------------------|-------|-------|-------|--------|-------|-------|-------|-------|-------|-------|-------|-------|-------|-------|
|                                |                    |       |       |       |        |       | D2    | D3    | D2    | D3    | D2    | D3    | D2    | D3    |       |
| hoo                            | -23.9 <sup>a</sup> | -11.4 | -18.2 | -9.8  | -37.0  | -29.3 | -26.0 | -18.3 | -18.3 | -18.3 | -20.4 | -20.4 | -20.4 | -20.4 | -20.4 |
| o2                             | -55.0 <sup>a</sup> | -54.3 | -76.1 | -65.1 | -103.7 | -77.4 | -70.4 | -43.1 | -43.1 | -43.1 | -61.8 | -61.8 | -61.8 | -61.8 | -61.8 |
| h2o                            | -45.5 <sup>a</sup> | -23.5 | -37.8 | -20.4 | -69.6  | -57.3 | -36.2 | -31.5 | -31.5 | -31.5 | -35.2 | -35.1 | -35.1 | -35.1 | -35.1 |
| h2                             | 41.8 <sup>a</sup>  | 85.1  | 55.1  | 38.6  | -11.2  | -3.9  | 50.2  | 49.8  | 49.7  | 49.8  | 50.2  | 50.2  | 50.2  | 50.1  | 50.1  |
| ch2ch                          | 87.1 <sup>a</sup>  | 110.0 | 89.3  | 70.3  | 63.3   | 67.5  | 82.8  | 77.1  | 77.3  | 77.2  | 79.1  | 79.3  | 79.4  | 79.4  | 79.4  |
| cch                            | 91.6 <sup>a</sup>  | 157.0 | 136.3 | 118.6 | 78.7   | 84.0  | 103.9 | 88.9  | 89.0  | 89.0  | 81.7  | 81.7  | 81.7  | 81.7  | 81.7  |
| cf                             | 85.4 <sup>a</sup>  | 109.2 | 91.3  | 78.1  | 77.3   | 84.6  | 88.8  | 84.1  | 84.1  | 84.1  | 87.2  | 87.2  | 87.3  | 87.3  | 87.3  |
| c                              | 92.0 <sup>a</sup>  | 137.9 | 118.0 | 91.1  | 87.6   | 95.9  | 99.2  | 94.2  | 94.2  | 94.2  | 97.6  | 97.6  | 97.6  | 97.6  | 97.6  |
| f                              | -1.7 <sup>a</sup>  | -0.1  | 26.2  | 12.2  | -16.9  | 4.4   | -13.5 | -7.9  | -8.0  | -8.0  | -6.5  | -6.6  | -6.6  | -6.6  | -6.6  |
| o                              | 39.2 <sup>a</sup>  | 82.6  | 63.9  | 55.7  | 29.9   | 34.3  | 51.9  | 48.9  | 48.8  | 48.8  | 52.3  | 52.2  | 52.2  | 52.2  | 52.2  |
| ISOMER20                       |                    |       |       |       |        |       |       |       |       |       |       |       |       |       |       |
| c-hono                         | 0.4 <sup>a</sup>   | 3.4   | -1.6  | 2.1   | -0.2   | -0.4  | 0.2   | -4.6  | -4.6  | -4.6  | -2.9  | -2.9  | -2.9  | -2.9  | -2.9  |
| hnc                            | 15.2 <sup>a</sup>  | 32.9  | 18.3  | 23.9  | 13.3   | 9.1   | 9.2   | 17.6  | 17.6  | 17.5  | 2.0   | 2.0   | 2.0   | 1.9   | 1.9   |
| hoen                           | 24.7 <sup>a</sup>  | 1.4   | 10.0  | 14.2  | 20.0   | 19.7  | 13.7  | 6.9   | 6.9   | 6.9   | 14.8  | 14.7  | 14.8  | 14.8  | 14.8  |
| honc                           | 84.6 <sup>a</sup>  | 73.7  | 70.2  | 77.5  | 72.0   | 67.8  | 49.5  | 58.8  | 58.8  | 58.8  | 58.6  | 58.6  | 58.6  | 58.6  | 58.6  |
| heno                           | 69.8 <sup>a</sup>  | 60.4  | 52.9  | 43.6  | 42.9   | 46.0  | 60.4  | 50.0  | 50.0  | 50.0  | 55.5  | 55.5  | 55.5  | 55.5  | 55.5  |
| honc                           | 59.9 <sup>a</sup>  | 72.3  | 60.2  | 63.3  | 52.1   | 48.1  | 35.7  | 51.9  | 51.9  | 51.9  | 43.9  | 43.9  | 43.8  | 43.8  | 43.8  |
| heno                           | 45.1 <sup>a</sup>  | 59.0  | 43.0  | 29.4  | 22.9   | 26.3  | 46.7  | 43.1  | 43.1  | 43.1  | 40.7  | 40.8  | 40.7  | 40.7  | 40.7  |
| honc                           | 14.8 <sup>a</sup>  | 13.3  | 17.2  | 33.9  | 29.2   | 21.8  | -10.9 | 8.8   | 8.8   | 8.8   | 3.1   | 3.1   | 3.1   | 3.1   | 3.1   |
| t-hcoh                         | 52.2 <sup>a</sup>  | 48.7  | 48.5  | 51.7  | 38.3   | 42.6  | 42.1  | 40.5  | 40.6  | 40.5  | 43.2  | 43.3  | 43.3  | 43.3  | 43.3  |
| c-hcoh                         | 4.8 <sup>a</sup>   | 0.4   | 1.1   | 2.7   | 0.9    | 2.0   | 4.2   | 1.3   | 1.3   | 1.3   | 6.2   | 6.1   | 6.2   | 6.2   | 6.2   |
| ch2c                           | 45.6 <sup>a</sup>  | 64.2  | 58.7  | 57.8  | 39.1   | 36.3  | 32.9  | 31.3  | 31.2  | 31.2  | 31.1  | 31.1  | 31.0  | 31.0  | 31.0  |
| c-hooo                         | 0.2 <sup>a</sup>   | 1.3   | 2.7   | 3.5   | 0.6    | -1.4  | 0.1   | -5.7  | -5.7  | -5.7  | -0.7  | -0.7  | -0.8  | -0.8  | -0.8  |
| c-n2h2                         | 5.4 <sup>a</sup>   | 3.0   | 3.0   | 5.4   | 5.4    | 5.1   | 1.5   | -3.2  | -3.2  | -3.2  | 2.3   | 2.2   | 2.2   | 2.2   | 2.2   |
| allene                         | 1.5 <sup>a</sup>   | 2.1   | 1.5   | 6.4   | -8.1   | -9.4  | -0.1  | -0.0  | 0.1   | -0.1  | -0.0  | 0.0   | -0.1  | -0.1  | -0.1  |
| dioxirane                      | 91.9 <sup>a</sup>  | 111.9 | 123.6 | 93.8  | 108.0  | 96.2  | 97.4  | 79.0  | 79.0  | 79.1  | 93.4  | 93.4  | 93.5  | 93.5  | 93.5  |
| oxirene                        | 77.4 <sup>a</sup>  | 66.2  | 71.2  | 62.9  | 71.1   | 69.0  | 70.6  | 69.4  | 69.3  | 69.4  | 74.6  | 74.4  | 74.6  | 74.6  | 74.6  |
| oxirane                        | 26.3 <sup>a</sup>  | 28.5  | 32.4  | 36.8  | 29.6   | 30.0  | 29.8  | 30.5  | 30.5  | 30.6  | 37.3  | 37.3  | 37.5  | 37.5  | 37.5  |
| henh                           | 7.5 <sup>a</sup>   | 4.2   | -2.1  | 4.8   | -7.9   | -3.5  | 1.8   | 6.9   | 6.9   | 6.9   | -0.5  | -0.4  | -0.5  | -0.5  | -0.5  |
| ch3nh                          | 7.7 <sup>a</sup>   | 12.5  | 18.3  | 6.9   | 19.2   | 16.6  | 8.7   | 12.2  | 12.2  | 12.2  | 13.3  | 13.2  | 13.3  | 13.3  | 13.3  |
| ISOMER20 (ZPVE-exclusive, 0 K) |                    |       |       |       |        |       |       |       |       |       |       |       |       |       |       |
| c-hono                         | 0.4 <sup>a</sup>   | 3.4   | -1.7  | 2.3   | -0.3   | -0.6  | 0.1   | -4.8  | -4.8  | -4.8  | -3.0  | -3.0  | -3.1  | -3.1  | -3.1  |
| hnc                            | 15.2 <sup>a</sup>  | 33.9  | 18.4  | 24.2  | 14.2   | 9.8   | 10.1  | 18.3  | 18.3  | 18.2  | 2.2   | 2.3   | 2.2   | 2.2   | 2.2   |
| hoen                           | 24.7 <sup>a</sup>  | 0.4   | 9.6   | 13.1  | 20.1   | 19.5  | 13.3  | 6.6   | 6.6   | 6.7   | 14.3  | 14.2  | 14.3  | 14.3  | 14.3  |
| honc                           | 84.6 <sup>a</sup>  | 73.1  | 69.9  | 77.1  | 72.4   | 67.9  | 49.4  | 59.0  | 59.0  | 59.0  | 58.6  | 58.5  | 58.5  | 58.5  | 58.5  |
| heno                           | 69.8 <sup>a</sup>  | 59.9  | 52.7  | 43.0  | 41.9   | 45.0  | 60.4  | 49.7  | 49.7  | 49.7  | 55.4  | 55.4  | 55.5  | 55.5  | 55.5  |
| honc                           | 59.9 <sup>a</sup>  | 72.7  | 60.3  | 63.9  | 52.3   | 48.4  | 36.1  | 52.4  | 52.4  | 52.4  | 44.3  | 44.3  | 44.2  | 44.2  | 44.2  |
| heno                           | 45.1 <sup>a</sup>  | 59.5  | 43.1  | 29.8  | 21.7   | 25.5  | 47.1  | 43.1  | 43.1  | 43.1  | 41.2  | 41.2  | 41.2  | 41.2  | 41.2  |
| honc                           | 14.8 <sup>a</sup>  | 13.2  | 17.2  | 34.1  | 30.6   | 22.8  | -11.0 | 9.3   | 9.3   | 9.3   | 3.1   | 3.1   | 3.1   | 3.1   | 3.1   |
| t-hcoh                         | 52.2 <sup>a</sup>  | 48.9  | 49.0  | 51.0  | 39.6   | 43.8  | 42.9  | 41.6  | 41.7  | 41.6  | 44.0  | 44.1  | 44.0  | 44.0  | 44.0  |
| c-hcoh                         | 4.8 <sup>a</sup>   | 0.7   | 1.3   | 3.3   | 1.0    | 2.1   | 4.5   | 1.5   | 1.4   | 1.5   | 6.5   | 6.4   | 6.5   | 6.5   | 6.5   |
| ch2c                           | 45.6 <sup>a</sup>  | 66.0  | 60.5  | 59.7  | 40.7   | 38.0  | 34.2  | 32.3  | 32.3  | 32.2  | 32.3  | 32.3  | 32.1  | 32.1  | 32.1  |
| c-hooo                         | 0.2 <sup>a</sup>   | 0.8   | 2.4   | 3.8   | 0.6    | -1.4  | 0.1   | -5.7  | -5.7  | -5.7  | -0.8  | -0.8  | -0.8  | -0.8  | -0.8  |
| c-n2h2                         | 5.4 <sup>a</sup>   | 3.2   | 3.2   | 5.7   | 5.6    | 5.3   | 1.6   | -3.1  | -3.1  | -3.1  | 2.5   | 2.4   | 2.5   | 2.5   | 2.5   |
| allene                         | 1.5 <sup>a</sup>   | 2.5   | 1.9   | 7.3   | -7.7   | -9.2  | 0.1   | 0.3   | 0.3   | 0.2   | 0.3   | 0.3   | 0.2   | 0.2   | 0.2   |

... continued on next page ...

Table S19: . . . continued from previous page . . .

| Species                    | Ref.              | MNDO  | AMI   | PM3  | PM6   | PM7  | OM1  |      | OM2  |      | OM3  |      | OM3  |      | D3T  |
|----------------------------|-------------------|-------|-------|------|-------|------|------|------|------|------|------|------|------|------|------|
|                            |                   |       |       |      |       |      | D2   | D3   | D2   | D3   | D2   | D3   | D2   | D3   |      |
| dioxirane                  | 91.9 <sup>a</sup> | 112.3 | 124.1 | 95.3 | 107.6 | 95.9 | 97.8 | 78.5 | 78.6 | 78.5 | 78.6 | 93.7 | 93.7 | 93.8 | 93.8 |
| oxirene                    | 77.4 <sup>a</sup> | 66.3  | 71.5  | 63.1 | 72.0  | 69.6 | 71.5 | 70.5 | 70.5 | 70.4 | 70.5 | 75.6 | 75.4 | 75.6 | 75.6 |
| oxirane                    | 26.3 <sup>a</sup> | 27.7  | 31.6  | 37.1 | 29.2  | 29.5 | 29.3 | 30.1 | 30.2 | 30.1 | 30.2 | 37.0 | 37.0 | 37.1 | 37.1 |
| hcnh                       | 7.5 <sup>a</sup>  | 4.5   | -2.3  | 4.5  | -7.7  | -3.2 | 2.0  | 7.1  | 7.2  | 7.2  | 7.2  | -0.2 | -0.2 | -0.2 | -0.2 |
| ch3nh                      | 7.7 <sup>a</sup>  | 12.9  | 18.8  | 7.3  | 19.7  | 17.0 | 8.7  | 12.1 | 12.1 | 12.0 | 12.1 | 13.4 | 13.3 | 13.4 | 13.4 |
| SN13                       |                   |       |       |      |       |      |      |      |      |      |      |      |      |      |      |
| ch4                        | 2.5 <sup>a</sup>  | 14.6  | 18.8  | 6.9  | 7.8   | 1.4  | 7.3  | 7.3  | 7.3  | 7.4  | 7.3  | 4.8  | 4.9  | 4.9  | 4.9  |
| ch3f                       | 14.7 <sup>a</sup> | 17.5  | 20.1  | 16.4 | 16.4  | 13.7 | 13.9 | 14.7 | 14.7 | 14.8 | 14.7 | 14.3 | 14.3 | 14.4 | 14.4 |
| c2h6                       | 17.8 <sup>a</sup> | 33.5  | 32.0  | 24.4 | 27.6  | 21.0 | 16.8 | 24.3 | 23.7 | 23.6 | 23.7 | 19.6 | 19.2 | 18.7 | 18.7 |
| c2h5f                      | 24.0 <sup>a</sup> | 41.3  | 36.4  | 32.6 | 31.6  | 27.9 | 18.5 | 26.3 | 25.7 | 25.5 | 25.7 | 23.2 | 22.6 | 22.3 | 22.3 |
| propane                    | 21.5 <sup>a</sup> | 31.7  | 30.1  | 25.1 | 30.6  | 25.4 | 22.4 | 26.9 | 26.0 | 25.9 | 26.0 | 23.3 | 22.5 | 22.1 | 22.1 |
| ch3nh2                     | 23.2 <sup>a</sup> | 33.8  | 33.8  | 29.7 | 25.3  | 21.3 | 26.8 | 28.2 | 27.7 | 27.8 | 27.7 | 31.5 | 31.0 | 30.7 | 30.7 |
| ch3nh                      | 31.4 <sup>a</sup> | 34.6  | 36.3  | 25.5 | 27.5  | 22.7 | 32.2 | 36.2 | 35.9 | 36.0 | 35.9 | 35.7 | 35.4 | 35.1 | 35.1 |
| methanol                   | 16.7 <sup>a</sup> | 21.1  | 21.7  | 17.1 | 10.1  | 11.7 | 18.7 | 25.7 | 25.4 | 25.4 | 25.4 | 22.7 | 22.5 | 22.3 | 22.3 |
| acetaldehyde               | 24.5 <sup>a</sup> | 32.7  | 36.0  | 35.5 | 33.5  | 25.7 | 33.2 | 34.2 | 33.7 | 33.7 | 33.7 | 31.9 | 31.5 | 31.0 | 31.0 |
| acetaldehyde               | 33.8 <sup>a</sup> | 37.3  | 36.3  | 31.6 | 35.4  | 33.0 | 22.4 | 24.4 | 23.8 | 23.8 | 23.9 | 23.0 | 22.6 | 22.1 | 22.1 |
| h2co                       | 29.1 <sup>a</sup> | 19.7  | 24.6  | 19.3 | 29.2  | 24.7 | 18.0 | 19.6 | 19.6 | 19.6 | 19.6 | 20.4 | 20.4 | 20.5 | 20.5 |
| hcof                       | 16.9 <sup>a</sup> | 16.1  | 20.2  | 20.4 | 23.3  | 22.0 | 17.1 | 16.9 | 17.0 | 17.0 | 17.0 | 17.6 | 17.5 | 17.6 | 17.6 |
| glyoxal                    | 48.1 <sup>a</sup> | 39.3  | 47.1  | 48.7 | 55.5  | 48.6 | 46.4 | 42.2 | 41.7 | 41.7 | 41.7 | 45.3 | 44.9 | 44.4 | 44.4 |
| SN13 (ZPVE-exclusive, 0 K) |                   |       |       |      |       |      |      |      |      |      |      |      |      |      |      |
| ch4                        | 2.5 <sup>a</sup>  | 11.3  | 15.6  | 2.5  | 5.0   | -1.2 | 3.3  | 3.6  | 3.6  | 3.7  | 3.6  | 1.3  | 1.3  | 1.3  | 1.3  |
| ch3f                       | 14.7 <sup>a</sup> | 13.7  | 16.3  | 12.1 | 13.1  | 10.6 | 9.5  | 10.7 | 10.7 | 10.8 | 10.7 | 10.4 | 10.4 | 10.5 | 10.5 |
| c2h6                       | 17.8 <sup>a</sup> | 31.5  | 29.5  | 21.0 | 24.6  | 18.1 | 13.5 | 21.2 | 20.5 | 20.5 | 20.5 | 16.4 | 16.0 | 15.5 | 15.5 |
| c2h5f                      | 24.0 <sup>a</sup> | 39.0  | 33.8  | 29.3 | 28.8  | 25.0 | 15.2 | 23.1 | 22.5 | 22.3 | 22.5 | 19.9 | 19.3 | 19.0 | 19.0 |
| propane                    | 21.5 <sup>a</sup> | 29.4  | 27.5  | 21.9 | 27.6  | 22.5 | 19.1 | 23.8 | 22.9 | 22.8 | 22.9 | 20.1 | 19.3 | 18.8 | 18.8 |
| ch3nh2                     | 23.2 <sup>a</sup> | 31.2  | 31.3  | 27.4 | 22.1  | 18.2 | 24.1 | 25.4 | 24.9 | 25.0 | 24.9 | 29.2 | 28.8 | 28.5 | 28.5 |
| ch3nh                      | 31.4 <sup>a</sup> | 33.3  | 35.0  | 24.5 | 25.8  | 21.1 | 30.7 | 34.8 | 34.5 | 34.6 | 34.5 | 34.7 | 34.4 | 34.1 | 34.1 |
| methanol                   | 16.7 <sup>a</sup> | 19.4  | 19.7  | 15.5 | 8.4   | 10.2 | 17.2 | 24.3 | 24.0 | 24.0 | 24.0 | 21.2 | 20.9 | 20.8 | 20.8 |
| acetaldehyde               | 24.5 <sup>a</sup> | 31.4  | 34.5  | 33.7 | 31.6  | 23.9 | 31.5 | 32.3 | 31.7 | 31.8 | 31.7 | 30.2 | 29.8 | 29.3 | 29.3 |
| acetaldehyde               | 33.8 <sup>a</sup> | 35.2  | 33.8  | 28.6 | 32.7  | 30.3 | 19.3 | 21.3 | 20.7 | 20.7 | 20.7 | 19.7 | 19.3 | 18.9 | 18.9 |
| h2co                       | 29.1 <sup>a</sup> | 16.2  | 21.0  | 15.7 | 25.9  | 21.7 | 14.1 | 16.1 | 16.1 | 16.2 | 16.1 | 17.0 | 17.0 | 17.1 | 17.1 |
| hcof                       | 16.9 <sup>a</sup> | 11.9  | 16.1  | 17.1 | 20.1  | 18.9 | 12.7 | 13.1 | 13.1 | 13.1 | 13.1 | 13.7 | 13.7 | 13.7 | 13.7 |
| glyoxal                    | 48.1 <sup>a</sup> | 38.4  | 45.5  | 47.0 | 53.7  | 46.9 | 45.5 | 40.4 | 39.9 | 39.9 | 39.9 | 44.4 | 44.0 | 43.5 | 43.5 |

a A.Karton, S.Daon, J.M.Martin, Chem.Phys.Lett. 510, 165 (2011).

Note: SCF calculations of the CCH<sub>3</sub> radical during thermochemical calculations could not be converged with many methods with tight SCF convergence criteria, thus criteria for both energy and density matrix were reduced to 10<sup>-6</sup>.

Table S20: Benchmark Results for the GMTKN30-CHNOF Data Set. Energies (kcal/mol). In the Column "Species" Is Given Only One of the Species, Energy of Which Was Used to Derive Final Energy. The Same Species May Be Involved in Different Relative or Reaction Energies, Thus Check Reference Value to Attribute Each of Entries to Specific Reaction in GMTKN30 Set

| Species                                                                                                                         | Ref.                | MNDO   | AMI    | PM3    | PM6    | PM7    | OM1    | OM2    |        | OM3    |        | D3T    | D3T    |
|---------------------------------------------------------------------------------------------------------------------------------|---------------------|--------|--------|--------|--------|--------|--------|--------|--------|--------|--------|--------|--------|
|                                                                                                                                 |                     |        |        |        |        |        |        | D2     | D3     | D2     | D3     |        |        |
| MB08-165                                                                                                                        |                     |        |        |        |        |        |        |        |        |        |        |        |        |
| 001                                                                                                                             | 129.0 <sup>a</sup>  | 120.7  | 109.0  | 82.1   | 50.5   | 49.8   | 113.5  | 112.3  | 113.2  | 113.4  | 114.1  | 115.1  | 115.5  |
| 069                                                                                                                             | 201.2 <sup>a</sup>  | 151.8  | 106.5  | 87.1   | 77.0   | 18.0   | 166.8  | 152.7  | 154.7  | 154.7  | 190.2  | 192.7  | 193.1  |
| 075                                                                                                                             | 32.6 <sup>a</sup>   | 49.1   | 41.4   | 64.9   | 122.8  | 112.3  | 41.5   | 20.8   | 22.3   | 22.4   | 30.6   | 31.7   | 32.9   |
| 079                                                                                                                             | 139.5 <sup>a</sup>  | 133.0  | 109.3  | 101.5  | 102.1  | 74.9   | 151.0  | 124.7  | 126.1  | 126.0  | 133.7  | 135.6  | 135.5  |
| 082                                                                                                                             | -120.4 <sup>a</sup> | -86.3  | -50.6  | -28.5  | 25.4   | 38.2   | -100.4 | -98.5  | -97.3  | -97.2  | -95.8  | -94.9  | -93.8  |
| 084                                                                                                                             | -18.3 <sup>a</sup>  | -7.7   | 2.5    | 4.5    | 17.2   | 21.7   | -10.6  | -15.9  | -15.3  | -15.4  | -15.9  | -15.6  | -15.2  |
| 085                                                                                                                             | -117.7 <sup>a</sup> | -110.7 | -76.6  | -11.3  | 41.7   | 79.4   | -85.8  | -96.4  | -97.1  | -96.8  | -108.8 | -109.1 | -109.8 |
| 090                                                                                                                             | -109.0 <sup>a</sup> | -101.6 | -107.3 | -116.0 | -129.8 | -135.7 | -101.6 | -106.0 | -105.7 | -105.4 | -103.8 | -103.5 | -103.2 |
| 099                                                                                                                             | 67.9 <sup>a</sup>   | 81.1   | 92.3   | 75.0   | 64.9   | 65.8   | 68.1   | 59.7   | 60.8   | 60.8   | 58.8   | 59.8   | 60.3   |
| 101                                                                                                                             | 20.5 <sup>a</sup>   | 15.7   | 3.0    | -33.0  | -79.1  | -86.1  | 10.3   | 5.2    | 6.2    | 6.4    | 8.9    | 10.4   | 10.6   |
| 103                                                                                                                             | -171.7 <sup>a</sup> | -92.0  | -43.7  | -28.5  | 74.5   | 92.8   | -113.9 | -93.2  | -91.9  | -91.7  | -100.0 | -99.1  | -97.6  |
| 105                                                                                                                             | -107.3 <sup>a</sup> | -82.0  | -37.4  | -29.2  | 42.9   | 47.7   | -104.6 | -107.8 | -106.6 | -106.4 | -97.7  | -97.0  | -95.6  |
| 107                                                                                                                             | -124.8 <sup>a</sup> | -78.4  | -76.6  | -78.1  | -36.0  | -58.8  | -116.5 | -114.6 | -112.7 | -112.4 | -97.4  | -95.7  | -94.0  |
| 109                                                                                                                             | -8.5 <sup>a</sup>   | -5.2   | -14.2  | -31.2  | -29.4  | -49.4  | -16.2  | -25.0  | -24.1  | -23.8  | -9.1   | -8.2   | -7.3   |
| 111                                                                                                                             | -362.4 <sup>a</sup> | -295.5 | -241.0 | -168.0 | -38.2  | -15.2  | -330.2 | -333.9 | -333.3 | -333.2 | -315.3 | -315.4 | -314.4 |
| 115                                                                                                                             | -67.9 <sup>a</sup>  | -86.3  | -45.2  | -24.3  | 11.8   | 14.1   | -89.6  | -62.7  | -61.7  | -61.3  | -59.1  | -58.3  | -57.0  |
| 117                                                                                                                             | -25.5 <sup>a</sup>  | 26.7   | 27.2   | 48.7   | 145.0  | 149.4  | 11.1   | -0.8   | -0.5   | -0.5   | -5.5   | -5.5   | -5.2   |
| 123                                                                                                                             | -125.6 <sup>a</sup> | -113.3 | -109.8 | -133.5 | -142.7 | -163.2 | -132.0 | -140.6 | -138.8 | -138.4 | -122.2 | -120.5 | -118.9 |
| 129                                                                                                                             | -570.6 <sup>a</sup> | -634.4 | -476.9 | -306.9 | -63.0  | 28.4   | -497.9 | -472.6 | -473.0 | -472.8 | -503.9 | -505.4 | -504.5 |
| 139                                                                                                                             | -266.7 <sup>a</sup> | -311.5 | -231.3 | -216.1 | -122.5 | -112.4 | -245.4 | -231.1 | -229.9 | -229.5 | -215.8 | -214.8 | -213.5 |
| 143                                                                                                                             | -192.4 <sup>a</sup> | -183.9 | -125.3 | -114.0 | -36.6  | -33.0  | -166.9 | -163.1 | -161.7 | -161.7 | -147.7 | -146.6 | -145.5 |
| 151                                                                                                                             | -225.2 <sup>a</sup> | -201.7 | -169.2 | -122.0 | -30.3  | -15.6  | -213.7 | -219.4 | -219.0 | -218.7 | -209.9 | -209.7 | -209.1 |
| 152                                                                                                                             | 59.2 <sup>a</sup>   | 47.7   | 64.8   | 43.2   | 41.4   | 48.3   | 43.4   | 42.5   | 43.9   | 44.3   | 62.9   | 64.3   | 65.4   |
| 157                                                                                                                             | -240.7 <sup>a</sup> | -261.6 | -215.1 | -168.4 | -56.6  | -38.0  | -228.2 | -217.8 | -217.7 | -217.7 | -231.3 | -231.6 | -231.2 |
| 164                                                                                                                             | 52.3 <sup>a</sup>   | 55.3   | 66.6   | 49.2   | 39.0   | 35.3   | 46.1   | 41.7   | 43.2   | 43.5   | 64.0   | 65.5   | 66.5   |
| a L.Goerigk and S.Grimme, J.Chem.Theory Comput. 6, 107 (2010) ; M.Korth and S.Grimme, J.Chem.Theory Comput. 5, 993-1003 (2010). |                     |        |        |        |        |        |        |        |        |        |        |        |        |
| MB08-165 (ZPVE-exclusive, 0 K)                                                                                                  |                     |        |        |        |        |        |        |        |        |        |        |        |        |
| 001                                                                                                                             | 129.0 <sup>a</sup>  | 131.1  | 119.3  | 94.8   | 52.5   | 52.2   | 125.7  | 122.7  | 123.8  | 123.9  | 125.5  | 126.5  | 126.9  |
| 069                                                                                                                             | 201.2 <sup>a</sup>  | 176.3  | 131.5  | 114.0  | 89.6   | 29.6   | 191.9  | 177.4  | 179.5  | 180.7  | 212.5  | 217.5  | 217.9  |
| 075                                                                                                                             | 32.6 <sup>a</sup>   | 42.8   | 39.0   | 58.7   | 125.5  | 115.6  | 35.4   | 14.4   | 14.7   | 16.0   | 25.4   | 25.5   | 27.7   |
| 079                                                                                                                             | 139.5 <sup>a</sup>  | 138.8  | 119.9  | 113.4  | 110.6  | 80.7   | 152.6  | 132.9  | 134.4  | 134.3  | 133.4  | 143.8  | 143.6  |
| 082                                                                                                                             | -120.4 <sup>a</sup> | -98.6  | -61.2  | -43.2  | 24.4   | 38.6   | -114.9 | -112.6 | -111.3 | -111.2 | -108.7 | -107.5 | -106.6 |
| 084                                                                                                                             | -18.3 <sup>a</sup>  | -11.3  | -0.2   | 0.5    | 17.7   | 22.6   | -14.9  | -20.1  | -19.5  | -19.6  | -19.6  | -19.2  | -18.9  |
| 085                                                                                                                             | -117.7 <sup>a</sup> | -146.0 | -105.1 | -43.4  | 29.5   | 68.5   | -119.9 | -129.6 | -123.6 | -123.3 | -142.6 | -141.5 | -140.0 |
| 090                                                                                                                             | -109.0 <sup>a</sup> | -109.2 | -109.0 | -112.9 | -134.6 | -139.4 | -106.7 | -110.9 | -108.2 | -107.0 | -110.0 | -105.5 | -106.2 |
| 099                                                                                                                             | 67.9 <sup>a</sup>   | 83.6   | 98.6   | 80.6   | 69.3   | 70.7   | 71.3   | 62.6   | 63.8   | 63.7   | 62.9   | 64.0   | 64.5   |
| 101                                                                                                                             | 20.5 <sup>a</sup>   | 23.8   | 13.0   | -20.6  | -80.4  | -82.7  | 16.8   | 12.9   | 15.0   | 14.8   | 14.7   | 19.2   | 18.3   |
| 103                                                                                                                             | -171.7 <sup>a</sup> | -111.1 | -59.8  | -48.7  | 67.8   | 88.4   | -137.1 | -116.6 | -115.2 | -115.0 | -120.2 | -118.9 | -117.8 |
| 105                                                                                                                             | -107.3 <sup>a</sup> | -92.9  | -46.2  | -41.8  | 42.5   | 48.6   | -118.6 | -122.0 | -120.8 | -120.6 | -110.5 | -109.5 | -108.4 |

... continued on next page ...

Table S20: ... continued from previous page ...

| Species | Ref.                | MNDO   | AMI    | PM3    | PM6    | PM7    | OM1    | OM2    |        |        | OM3    |        |        | D3T    |        |
|---------|---------------------|--------|--------|--------|--------|--------|--------|--------|--------|--------|--------|--------|--------|--------|--------|
|         |                     |        |        |        |        |        |        | D2     | D3     | D3T    | D2     | D3     | D3T    |        |        |
| 107     | -124.8 <sup>a</sup> | -65.4  | -64.7  | -69.0  | -27.8  | -50.7  | -106.0 | -104.8 | -102.8 | -102.5 | -102.5 | -88.4  | -86.6  | -84.9  | -84.9  |
| 109     | -8.5 <sup>a</sup>   | 10.4   | 1.2    | -16.8  | -20.8  | -41.4  | -1.0   | -10.2  | -9.3   | -9.0   | -9.0   | 3.3    | 5.4    | 6.3    | 6.3    |
| 111     | -362.4 <sup>a</sup> | -337.6 | -276.9 | -208.3 | -49.3  | -24.6  | -377.2 | -379.1 | -378.4 | -378.3 | -378.3 | -356.0 | -355.7 | -355.1 | -355.1 |
| 115     | -67.9 <sup>a</sup>  | -90.5  | -42.9  | -23.4  | 17.5   | 20.1   | -93.3  | -63.3  | -62.2  | -61.9  | -61.9  | -64.1  | -58.3  | -57.2  | -57.2  |
| 117     | -25.5 <sup>a</sup>  | 0.4    | 5.9    | 26.3   | 139.8  | 146.1  | -17.8  | -26.8  | -26.5  | -26.5  | -26.5  | -31.0  | -28.3  | -28.3  | -28.2  |
| 123     | -125.6 <sup>a</sup> | -108.5 | -104.9 | -127.6 | -140.8 | -162.7 | -128.3 | -130.6 | -128.7 | -128.4 | -128.4 | -112.3 | -110.6 | -108.9 | -108.9 |
| 129     | -570.6 <sup>a</sup> | -736.5 | -567.2 | -401.3 | -97.1  | 0.3    | -610.0 | -579.7 | -579.9 | -579.8 | -579.8 | -601.6 | -602.3 | -602.3 | -602.3 |
| 139     | -266.7 <sup>a</sup> | -329.6 | -329.6 | -232.7 | -129.7 | -118.4 | -264.4 | -244.5 | -243.2 | -242.9 | -242.9 | -228.8 | -227.5 | -226.5 | -226.5 |
| 143     | -192.4 <sup>a</sup> | -197.3 | -136.0 | -129.2 | -38.5  | -33.4  | -182.9 | -178.1 | -176.6 | -176.7 | -176.7 | -161.0 | -159.7 | -158.8 | -158.8 |
| 151     | -225.2 <sup>a</sup> | -228.3 | -190.9 | -145.1 | -36.7  | -20.3  | -243.4 | -245.5 | -245.1 | -244.9 | -244.9 | -237.2 | -233.1 | -234.0 | -234.0 |
| 152     | 59.2 <sup>a</sup>   | 58.0   | 73.3   | 50.8   | 44.0   | 52.4   | 52.4   | 48.3   | 49.9   | 50.0   | 50.0   | 70.3   | 71.8   | 72.9   | 72.9   |
| 157     | -240.7 <sup>a</sup> | -295.6 | -244.1 | -199.3 | -68.5  | -48.4  | -266.7 | -254.6 | -254.3 | -254.5 | -254.5 | -264.7 | -264.8 | -264.7 | -264.7 |
| 164     | 52.3 <sup>a</sup>   | 64.5   | 76.7   | 56.0   | 48.0   | 41.4   | 54.0   | 48.7   | 50.3   | 50.5   | 50.5   | 70.9   | 72.6   | 73.5   | 73.5   |

  

| a L.Goerigk and S.Grimme, J.Chem.Theory Comput. 6, 107 (2010) ; M.Korth and S.Grimme, J.Chem.Theory Comput. 5, 993-1003 (2010). |                    |       |       |       |       |       |       |       |       |       |       |       |       |       |       |
|---------------------------------------------------------------------------------------------------------------------------------|--------------------|-------|-------|-------|-------|-------|-------|-------|-------|-------|-------|-------|-------|-------|-------|
| W4-08 (ZPVE-exclusive, 0 K)                                                                                                     |                    |       |       |       |       |       |       |       |       |       |       |       |       |       |       |
| Species                                                                                                                         | Ref.               | MNDO  | AMI   | PM3   | PM6   | PM7   | OM1   | OM2   |       |       | OM3   |       |       | D3T   |       |
|                                                                                                                                 |                    |       |       |       |       |       |       | D2    | D3    | D3T   | D2    | D3    | D3T   |       |       |
| c2h6                                                                                                                            | 713.1 <sup>a</sup> | 712.9 | 707.3 | 709.7 | 703.3 | 706.1 | 714.2 | 712.4 | 714.1 | 714.2 | 714.2 | 711.5 | 712.5 | 714.4 | 714.4 |
| h2cn                                                                                                                            | 343.8 <sup>a</sup> | 341.9 | 343.4 | 347.9 | 335.3 | 340.7 | 346.2 | 345.8 | 346.2 | 346.5 | 346.5 | 346.6 | 346.8 | 347.7 | 347.7 |
| ncn                                                                                                                             | 502.0 <sup>a</sup> | 509.7 | 508.4 | 498.3 | 501.3 | 504.4 | 504.2 | 501.2 | 501.7 | 502.1 | 502.1 | 501.3 | 501.5 | 502.9 | 502.9 |
| ch2nh2                                                                                                                          | 482.3 <sup>a</sup> | 498.0 | 499.5 | 494.8 | 494.8 | 494.3 | 488.1 | 485.9 | 486.8 | 487.1 | 487.1 | 488.9 | 489.4 | 490.8 | 490.8 |
| ch3nh                                                                                                                           | 474.6 <sup>a</sup> | 484.5 | 480.7 | 487.5 | 475.1 | 477.3 | 479.4 | 473.9 | 474.7 | 475.0 | 475.0 | 475.5 | 476.1 | 477.4 | 477.4 |
| ch3nh2                                                                                                                          | 582.3 <sup>a</sup> | 585.5 | 582.2 | 581.0 | 574.6 | 575.9 | 582.7 | 578.6 | 579.8 | 580.0 | 580.0 | 578.4 | 579.1 | 580.7 | 580.7 |
| cf2                                                                                                                             | 258.8 <sup>a</sup> | 276.7 | 279.2 | 261.0 | 274.2 | 281.1 | 265.0 | 267.1 | 267.3 | 267.4 | 267.4 | 266.4 | 266.5 | 267.0 | 267.0 |
| n2h                                                                                                                             | 224.9 <sup>a</sup> | 237.0 | 238.9 | 235.0 | 220.0 | 225.0 | 240.3 | 236.7 | 236.9 | 237.1 | 237.1 | 239.3 | 239.3 | 240.0 | 240.0 |
| n2h2                                                                                                                            | 296.5 <sup>a</sup> | 311.5 | 310.2 | 303.4 | 291.1 | 296.2 | 310.5 | 300.0 | 300.3 | 300.7 | 300.7 | 312.1 | 312.2 | 313.1 | 313.1 |
| n2h4                                                                                                                            | 438.3 <sup>a</sup> | 445.4 | 443.7 | 437.6 | 438.7 | 439.1 | 445.4 | 434.7 | 435.5 | 435.9 | 436.2 | 436.2 | 436.7 | 438.0 | 438.0 |
| fo2                                                                                                                             | 134.7 <sup>a</sup> | 88.0  | 116.5 | 124.6 | 139.5 | 135.7 | 119.0 | 118.0 | 118.2 | 118.3 | 118.3 | 119.3 | 119.4 | 119.9 | 119.9 |
| foof                                                                                                                            | 152.4 <sup>a</sup> | 78.5  | 126.6 | 143.6 | 160.1 | 154.0 | 132.4 | 147.5 | 147.9 | 148.0 | 148.0 | 137.7 | 137.9 | 138.6 | 138.6 |
| h2                                                                                                                              | 109.5 <sup>a</sup> | 103.7 | 110.6 | 120.3 | 136.4 | 142.9 | 106.0 | 109.0 | 109.0 | 109.1 | 109.1 | 107.6 | 107.6 | 107.7 | 107.7 |
| oh                                                                                                                              | 107.2 <sup>a</sup> | 115.4 | 114.8 | 112.8 | 100.2 | 107.1 | 112.2 | 109.9 | 109.9 | 110.0 | 110.0 | 110.7 | 110.7 | 110.8 | 110.8 |
| hf                                                                                                                              | 141.6 <sup>a</sup> | 134.9 | 145.5 | 138.7 | 137.7 | 137.5 | 143.9 | 137.2 | 137.2 | 137.2 | 137.2 | 139.9 | 139.9 | 140.0 | 140.0 |
| h2o                                                                                                                             | 233.0 <sup>a</sup> | 236.7 | 233.7 | 228.6 | 225.1 | 229.6 | 232.0 | 229.4 | 229.5 | 229.6 | 229.6 | 230.4 | 230.4 | 230.7 | 230.7 |
| ch                                                                                                                              | 84.2 <sup>a</sup>  | 82.9  | 81.3  | 79.3  | 83.9  | 86.1  | 89.2  | 86.0  | 86.1  | 86.2  | 86.2  | 88.0  | 88.0  | 88.2  | 88.2  |
| ch2                                                                                                                             | 190.7 <sup>a</sup> | 205.4 | 201.7 | 207.1 | 201.2 | 197.3 | 193.5 | 191.5 | 191.7 | 191.8 | 191.8 | 193.6 | 193.7 | 194.0 | 194.0 |
| ch3                                                                                                                             | 307.9 <sup>a</sup> | 318.0 | 311.3 | 312.4 | 311.7 | 311.8 | 306.5 | 308.3 | 308.6 | 308.7 | 308.7 | 305.8 | 306.1 | 306.6 | 306.6 |
| ch4                                                                                                                             | 420.4 <sup>a</sup> | 415.0 | 409.9 | 415.8 | 411.3 | 413.5 | 417.9 | 421.7 | 422.2 | 422.4 | 422.4 | 420.4 | 420.4 | 421.3 | 421.3 |
| c2h                                                                                                                             | 266.2 <sup>a</sup> | 236.3 | 236.2 | 240.0 | 267.0 | 264.3 | 253.8 | 261.0 | 284.2 | 284.3 | 284.3 | 275.2 | 275.3 | 275.9 | 275.9 |
| c2h2                                                                                                                            | 405.5 <sup>a</sup> | 402.9 | 405.2 | 408.8 | 401.3 | 401.1 | 407.3 | 404.7 | 405.1 | 405.3 | 405.3 | 404.4 | 404.5 | 405.4 | 405.4 |
| nh3                                                                                                                             | 298.0 <sup>a</sup> | 294.8 | 294.2 | 290.6 | 287.4 | 287.8 | 291.8 | 291.7 | 291.9 | 292.1 | 292.1 | 296.0 | 296.0 | 296.7 | 296.7 |
| c2                                                                                                                              | 147.0 <sup>a</sup> | 103.5 | 121.7 | 83.0  | 151.3 | 137.9 | 111.6 | 147.7 | 147.8 | 148.0 | 148.0 | 125.7 | 125.7 | 126.2 | 126.2 |
| n2                                                                                                                              | 228.5 <sup>a</sup> | 220.7 | 217.8 | 211.3 | 187.5 | 195.0 | 233.5 | 226.1 | 226.1 | 226.3 | 226.3 | 216.2 | 216.2 | 216.5 | 216.5 |
| co                                                                                                                              | 259.7 <sup>a</sup> | 237.1 | 236.0 | 252.6 | 246.1 | 250.7 | 263.0 | 250.6 | 250.7 | 250.8 | 250.8 | 250.8 | 250.8 | 251.1 | 251.1 |
| cn                                                                                                                              | 181.3 <sup>a</sup> | 156.5 | 171.1 | 157.9 | 181.8 | 180.9 | 173.4 | 174.7 | 174.8 | 175.0 | 175.0 | 182.1 | 182.1 | 182.5 | 182.5 |
| no                                                                                                                              | 152.8 <sup>a</sup> | 174.4 | 172.2 | 159.7 | 146.4 | 151.8 | 168.7 | 149.5 | 149.5 | 149.6 | 149.6 | 157.7 | 157.7 | 158.0 | 158.0 |
| o2                                                                                                                              | 120.8 <sup>a</sup> | 127.3 | 129.1 | 123.2 | 129.6 | 124.5 | 126.9 | 117.7 | 117.7 | 117.8 | 117.8 | 123.5 | 123.5 | 123.7 | 123.7 |
| of                                                                                                                              | 53.1 <sup>a</sup>  | 43.0  | 51.0  | 57.0  | 39.6  | 45.3  | 43.9  | 49.3  | 49.4  | 49.4  | 49.4  | 48.1  | 48.1  | 48.3  | 48.3  |

... continued on next page ...



Table S20: ... continued from previous page ...

| Species | Ref.               | MNDO  | AMI   | PM3   | PM6   | PM7   | OM1   | OM2   |       |       | OM3   |       |       | D3T   |
|---------|--------------------|-------|-------|-------|-------|-------|-------|-------|-------|-------|-------|-------|-------|-------|
|         |                    |       |       |       |       |       |       | D2    | D3    | D3T   | D2    | D3    | D3T   |       |
| f2      | 39.0 <sup>a</sup>  | 16.8  | 60.8  | 58.8  | 37.6  | 54.6  | 25.7  | 37.3  | 37.3  | 37.4  | 35.6  | 35.6  | 37.4  | 35.8  |
| nh      | 83.1 <sup>a</sup>  | 92.1  | 90.2  | 93.6  | 84.7  | 86.0  | 88.9  | 83.4  | 83.4  | 83.5  | 88.8  | 88.8  | 83.5  | 89.0  |
| nh2     | 182.6 <sup>a</sup> | 190.4 | 188.0 | 190.1 | 180.4 | 181.7 | 185.6 | 178.7 | 178.8 | 178.9 | 186.1 | 186.2 | 178.9 | 186.6 |
| hcn     | 313.6 <sup>a</sup> | 309.7 | 313.6 | 311.2 | 310.4 | 313.8 | 320.7 | 318.3 | 318.5 | 318.7 | 316.2 | 316.3 | 318.7 | 316.9 |
| hof     | 158.7 <sup>a</sup> | 139.1 | 157.4 | 166.3 | 152.8 | 152.8 | 152.2 | 154.6 | 154.7 | 154.8 | 152.6 | 152.6 | 154.8 | 153.0 |
| cf      | 132.7 <sup>a</sup> | 152.9 | 153.1 | 137.2 | 142.3 | 146.2 | 137.5 | 138.4 | 138.4 | 138.5 | 138.3 | 138.3 | 138.5 | 138.6 |
| ch2c    | 359.9 <sup>a</sup> | 336.9 | 344.7 | 349.1 | 360.6 | 363.1 | 373.1 | 372.5 | 372.8 | 373.2 | 372.1 | 372.2 | 373.2 | 373.3 |
| ch2ch   | 446.1 <sup>a</sup> | 448.5 | 447.5 | 450.0 | 450.8 | 450.3 | 451.1 | 448.6 | 449.2 | 449.5 | 449.8 | 450.1 | 449.5 | 451.3 |
| c2h4    | 564.1 <sup>a</sup> | 561.4 | 558.7 | 558.1 | 556.8 | 559.0 | 565.4 | 562.8 | 563.6 | 563.9 | 561.3 | 561.8 | 563.9 | 563.3 |
| ch2nh   | 439.4 <sup>a</sup> | 440.8 | 440.3 | 437.1 | 428.8 | 432.8 | 442.6 | 438.0 | 438.5 | 438.9 | 440.8 | 441.1 | 442.3 | 442.3 |
| hco     | 279.4 <sup>a</sup> | 285.7 | 286.7 | 296.4 | 287.4 | 286.7 | 294.4 | 287.5 | 287.7 | 287.9 | 291.2 | 291.3 | 287.9 | 291.8 |
| ch2o    | 374.7 <sup>a</sup> | 381.6 | 379.1 | 381.5 | 367.1 | 372.0 | 382.8 | 377.5 | 377.8 | 378.0 | 378.7 | 378.9 | 378.0 | 379.6 |
| co2     | 390.1 <sup>a</sup> | 368.6 | 372.8 | 379.0 | 379.4 | 379.1 | 385.0 | 371.5 | 371.7 | 371.9 | 377.9 | 378.0 | 371.9 | 378.6 |
| hno     | 205.9 <sup>a</sup> | 224.9 | 225.2 | 214.8 | 200.5 | 209.6 | 223.6 | 211.0 | 211.1 | 211.3 | 220.8 | 220.9 | 221.4 | 221.4 |
| no2     | 227.9 <sup>a</sup> | 239.8 | 247.8 | 236.6 | 241.9 | 238.9 | 242.6 | 228.7 | 228.9 | 229.2 | 233.2 | 233.2 | 229.2 | 233.9 |
| n2o     | 270.9 <sup>a</sup> | 259.9 | 262.4 | 265.1 | 262.5 | 262.6 | 270.2 | 264.3 | 264.5 | 264.8 | 253.0 | 253.0 | 264.8 | 253.8 |
| o3      | 147.4 <sup>a</sup> | 118.3 | 118.9 | 125.8 | 126.0 | 137.6 | 131.6 | 143.2 | 143.3 | 143.5 | 132.9 | 132.9 | 143.5 | 133.5 |
| hoo     | 175.5 <sup>a</sup> | 174.2 | 171.3 | 178.4 | 165.6 | 170.3 | 179.2 | 179.9 | 180.0 | 180.2 | 177.0 | 177.0 | 180.2 | 177.4 |
| h2o2    | 269.1 <sup>a</sup> | 258.2 | 261.5 | 275.8 | 255.5 | 262.7 | 270.8 | 266.5 | 266.8 | 267.0 | 266.4 | 266.6 | 267.0 | 267.2 |
| f2o2    | 93.8 <sup>a</sup>  | 57.8  | 86.0  | 102.9 | 94.2  | 95.6  | 82.3  | 93.7  | 93.9  | 94.0  | 88.9  | 89.0  | 94.0  | 89.3  |

a L.Goerigk and S.Grimme, J.Chem.Theory Comput. 6, 107 (2010) ; A.Karton, A.Tarnopolsky, J.F.Lamere, G.C.Schatz, and J.M.L.Martin, J.Phys.Chem.A 112, 12868 (2008).

| Species | Ref.               | MNDO  | AMI   | PM3   | PM6   | PM7   | OM1   | OM2   |       |       | OM3   |       |       | D3T   |
|---------|--------------------|-------|-------|-------|-------|-------|-------|-------|-------|-------|-------|-------|-------|-------|
|         |                    |       |       |       |       |       |       | D2    | D3    | D3T   | D2    | D3    | D3T   |       |
| h+      | 314.9 <sup>a</sup> | 274.6 | 262.8 | 301.5 | 259.4 | 255.3 | 296.1 | 291.7 | 291.7 | 291.7 | 287.3 | 287.3 | 291.7 | 287.3 |
| c+      | 259.6 <sup>a</sup> | 218.5 | 227.9 | 227.4 | 202.0 | 189.6 | 203.3 | 230.9 | 230.9 | 230.9 | 227.7 | 227.7 | 230.9 | 227.7 |
| n+      | 335.3 <sup>a</sup> | 304.5 | 304.3 | 306.3 | 330.5 | 325.0 | 290.9 | 314.3 | 314.3 | 314.3 | 309.4 | 309.4 | 314.3 | 309.4 |
| o+      | 313.8 <sup>a</sup> | 283.6 | 294.3 | 294.4 | 220.8 | 243.0 | 279.0 | 309.7 | 309.7 | 309.7 | 309.1 | 309.1 | 309.7 | 309.1 |
| f+      | 401.7 <sup>a</sup> | 359.1 | 338.5 | 378.0 | 404.8 | 397.8 | 372.7 | 393.4 | 393.4 | 393.4 | 398.8 | 398.8 | 393.4 | 398.8 |
| IP_59   | 296.3 <sup>a</sup> | 285.3 | 271.2 | 279.2 | 269.7 | 271.8 | 284.5 | 284.9 | 284.9 | 284.9 | 288.2 | 288.2 | 284.9 | 288.2 |
| IP_60   | 235.7 <sup>a</sup> | 228.9 | 216.8 | 206.5 | 214.9 | 215.8 | 222.9 | 221.9 | 221.8 | 221.9 | 225.6 | 225.6 | 221.9 | 225.6 |
| IP_61   | 300.9 <sup>a</sup> | 277.6 | 285.3 | 286.1 | 242.7 | 257.6 | 275.8 | 298.6 | 298.6 | 298.6 | 301.4 | 301.4 | 298.6 | 301.4 |
| IP_62   | 292.6 <sup>a</sup> | 272.3 | 275.5 | 279.2 | 266.7 | 273.8 | 268.5 | 284.0 | 284.0 | 284.0 | 286.2 | 286.2 | 284.0 | 286.2 |
| IP_63   | 371.3 <sup>a</sup> | 329.6 | 319.7 | 351.9 | 351.9 | 355.5 | 350.4 | 362.5 | 362.6 | 362.5 | 374.8 | 374.8 | 362.5 | 374.8 |
| IP_71   | 264.6 <sup>a</sup> | 245.6 | 256.4 | 260.2 | 258.5 | 258.7 | 256.2 | 258.4 | 258.4 | 258.4 | 264.3 | 264.3 | 258.4 | 264.3 |
| IP_72   | 243.7 <sup>a</sup> | 223.4 | 228.9 | 233.6 | 232.8 | 233.7 | 233.3 | 232.9 | 232.9 | 232.9 | 239.1 | 239.1 | 232.9 | 239.2 |
| IP_73   | 323.0 <sup>a</sup> | 307.4 | 302.3 | 299.4 | 271.8 | 279.4 | 304.6 | 314.5 | 314.5 | 314.5 | 313.5 | 313.5 | 314.5 | 313.5 |
| IP_74   | 359.4 <sup>a</sup> | 342.5 | 329.6 | 318.4 | 293.8 | 311.8 | 349.6 | 355.4 | 355.4 | 355.4 | 334.7 | 334.7 | 355.4 | 334.7 |
| IP_75   | 277.7 <sup>a</sup> | 266.5 | 255.2 | 262.4 | 240.4 | 237.4 | 261.0 | 298.1 | 298.1 | 298.1 | 288.9 | 288.9 | 298.1 | 288.9 |

a L.Goerigk and S.Grimme, J.Chem.Theory Comput. 6, 107 (2010) ; L.A.Curtiss, K.Raghavachari, G.W.Trucks, and J.A.Pople, J.Chem.Phys. 94, 7221 (1991).

| Species | Ref.              | MNDO  | AMI   | PM3   | PM6   | PM7   | OM1  | OM2  |      |      | OM3  |      |      | D3T  |
|---------|-------------------|-------|-------|-------|-------|-------|------|------|------|------|------|------|------|------|
|         |                   |       |       |       |       |       |      | D2   | D3   | D3T  | D2   | D3   | D3T  |      |
| EA_c    | 29.2 <sup>a</sup> | 5.9   | 15.3  | 39.1  | -1.9  | -14.6 | -4.3 | 18.3 | 18.3 | 18.3 | 15.1 | 15.1 | 18.3 | 15.1 |
| EA_o    | 33.7 <sup>a</sup> | 2.0   | 12.7  | 22.7  | 20.4  | 22.8  | -2.6 | 28.1 | 28.1 | 28.1 | 27.6 | 27.6 | 28.1 | 27.6 |
| EA_f    | 78.4 <sup>a</sup> | 36.0  | 15.4  | 50.1  | 80.5  | 77.5  | 49.7 | 70.4 | 70.4 | 70.4 | 75.7 | 75.7 | 70.4 | 75.7 |
| EA_8n   | 27.9 <sup>a</sup> | 4.8   | 12.9  | 30.7  | 1.2   | -8.0  | 1.2  | 18.0 | 18.0 | 18.0 | 18.1 | 18.1 | 18.0 | 18.1 |
| EA_9n   | 13.4 <sup>a</sup> | -26.6 | -20.2 | -14.4 | -23.0 | -21.6 | -6.1 | 3.2  | 3.2  | 3.2  | 7.0  | 7.0  | 3.2  | 7.0  |

... continued on next page ...

Table S20: ... continued from previous page ...

| Species                                                                                                                                               | Ref.               | MNDO  | AMI   | PM3   | PM6   | PM7   | OM1   | OM2   |       |       | OM3   |       |       |       |
|-------------------------------------------------------------------------------------------------------------------------------------------------------|--------------------|-------|-------|-------|-------|-------|-------|-------|-------|-------|-------|-------|-------|-------|
|                                                                                                                                                       |                    |       |       |       |       |       |       | D2    | D3    | D3T   | D2    | D3    | D3T   |       |
| EA_10n                                                                                                                                                | 1.2 <sup>a</sup>   | -36.3 | -30.9 | -23.2 | -27.9 | -25.9 | -20.0 | -16.8 | -16.8 | -16.8 | -8.8  | -8.8  | -8.7  | -8.7  |
| EA_11n                                                                                                                                                | 8.3 <sup>a</sup>   | -17.9 | -19.7 | 5.0   | -2.0  | 2.8   | -26.0 | -8.9  | -8.9  | -8.9  | -9.6  | -9.6  | -9.6  | -9.6  |
| EA_12n                                                                                                                                                | 16.8 <sup>a</sup>  | -10.0 | -13.7 | -1.3  | 1.1   | 5.9   | -15.2 | -3.8  | -3.8  | -3.8  | -0.5  | -0.5  | -0.5  | -0.5  |
| EA_13n                                                                                                                                                | 41.7 <sup>a</sup>  | 6.6   | 15.1  | 20.9  | 45.2  | 39.5  | 7.7   | 29.4  | 29.4  | 29.4  | 33.6  | 33.6  | 33.6  | 33.6  |
| EA_20n                                                                                                                                                | 9.5 <sup>a</sup>   | -15.7 | -14.7 | 5.4   | -9.0  | -5.6  | -11.0 | 18.9  | 18.9  | 18.9  | 17.0  | 17.0  | 17.0  | 17.0  |
| EA_21n                                                                                                                                                | -0.2 <sup>a</sup>  | -2.9  | -3.6  | 9.1   | 30.2  | 23.2  | -10.8 | 13.2  | 13.2  | 13.2  | 10.0  | 10.0  | 10.0  | 10.0  |
| EA_22n                                                                                                                                                | 89.5 <sup>a</sup>  | 74.0  | 70.6  | 100.3 | 65.5  | 72.8  | 89.8  | 88.4  | 88.4  | 88.4  | 88.0  | 88.0  | 88.0  | 88.0  |
| a L.Goerigk and S.Grimme, J.Chem.Theory Comput. 6, 107 (2010) ; L.A.Curtiss, K.Raghavachari, G.W.Trucks, and J.A.Pople, J.Chem.Phys. 94, 7221 (1991). |                    |       |       |       |       |       |       |       |       |       |       |       |       |       |
| PA                                                                                                                                                    |                    |       |       |       |       |       |       |       |       |       |       |       |       |       |
| p2p                                                                                                                                                   | 167.8 <sup>a</sup> | 143.2 | 152.1 | 147.9 | 145.9 | 143.6 | 156.0 | 152.6 | 153.0 | 152.8 | 149.4 | 149.4 | 149.8 | 149.8 |
| p4p                                                                                                                                                   | 193.4 <sup>a</sup> | 186.9 | 189.4 | 185.7 | 189.4 | 188.2 | 196.0 | 197.0 | 197.4 | 197.3 | 191.3 | 191.3 | 191.8 | 191.8 |
| p6p                                                                                                                                                   | 209.7 <sup>a</sup> | 200.2 | 202.2 | 199.0 | 202.0 | 200.8 | 211.7 | 212.3 | 212.7 | 212.7 | 206.2 | 206.2 | 206.7 | 206.7 |
| p8p                                                                                                                                                   | 219.7 <sup>a</sup> | 208.2 | 210.0 | 207.2 | 209.9 | 208.6 | 221.3 | 221.6 | 222.0 | 221.9 | 215.3 | 215.3 | 215.8 | 215.8 |
| nb3p                                                                                                                                                  | 211.9 <sup>a</sup> | 196.5 | 209.7 | 209.4 | 212.2 | 208.6 | 214.0 | 221.4 | 221.6 | 221.6 | 213.4 | 213.4 | 213.7 | 213.7 |
| h2op                                                                                                                                                  | 171.6 <sup>a</sup> | 172.0 | 162.7 | 154.0 | 168.4 | 159.8 | 174.8 | 167.6 | 167.8 | 167.8 | 165.7 | 165.7 | 166.0 | 166.0 |
| c2h2p                                                                                                                                                 | 157.4 <sup>a</sup> | 129.7 | 135.2 | 131.6 | 128.5 | 128.4 | 145.9 | 134.0 | 134.2 | 134.2 | 134.0 | 134.0 | 134.4 | 134.4 |
| h2p                                                                                                                                                   | 106.3 <sup>a</sup> | 110.5 | 139.0 | 138.6 | 178.2 | 184.6 | 111.2 | 47.9  | 47.9  | 48.0  | 69.4  | 69.4  | 69.6  | 69.6  |
| a L.Goerigk and S.Grimme, J.Chem.Theory Comput. 6, 107 (2010).                                                                                        |                    |       |       |       |       |       |       |       |       |       |       |       |       |       |
| SIE11                                                                                                                                                 |                    |       |       |       |       |       |       |       |       |       |       |       |       |       |
| nb3                                                                                                                                                   | 35.3 <sup>a</sup>  | 12.2  | 12.5  | 14.6  | 33.6  | 31.2  | 29.9  | 27.3  | 28.2  | 28.1  | 30.9  | 30.9  | 32.1  | 32.1  |
| h2o                                                                                                                                                   | 37.2 <sup>a</sup>  | 0.8   | 33.4  | 36.5  | 37.9  | 30.4  | 29.1  | 31.2  | 31.8  | 31.7  | 30.5  | 30.5  | 31.3  | 31.3  |
| but+                                                                                                                                                  | 35.3 <sup>a</sup>  | 16.0  | 28.7  | 17.9  | 34.2  | 35.8  | 35.2  | 52.7  | 55.3  | 54.6  | 44.0  | 44.0  | 46.7  | 46.7  |
| ch3                                                                                                                                                   | 22.6 <sup>a</sup>  | -0.1  | 10.1  | 3.6   | 6.9   | 10.5  | 15.7  | 28.6  | 30.0  | 29.8  | 22.4  | 22.4  | 24.3  | 24.3  |
| c2h4_f2                                                                                                                                               | 1.1 <sup>a</sup>   | -3.5  | -0.7  | -1.1  | 0.1   | 0.5   | -0.3  | -0.3  | 0.1   | 0.1   | -0.5  | -0.5  | -0.1  | -0.1  |
| a L.Goerigk and S.Grimme, J.Chem.Theory Comput. 6, 107 (2010).                                                                                        |                    |       |       |       |       |       |       |       |       |       |       |       |       |       |
| BHPERI                                                                                                                                                |                    |       |       |       |       |       |       |       |       |       |       |       |       |       |
| TS1                                                                                                                                                   | 35.3 <sup>a</sup>  | 50.5  | 35.2  | 41.1  | 41.0  | 34.3  | 43.5  | 41.9  | 42.0  | 41.7  | 42.2  | 42.2  | 41.9  | 41.9  |
| TS2                                                                                                                                                   | 30.9 <sup>a</sup>  | 41.5  | 33.0  | 34.0  | 34.4  | 32.0  | 36.3  | 38.2  | 37.4  | 37.4  | 36.3  | 36.3  | 35.1  | 35.1  |
| TS3                                                                                                                                                   | 28.3 <sup>a</sup>  | 41.3  | 39.0  | 38.9  | 39.6  | 36.2  | 42.1  | 43.3  | 43.5  | 43.3  | 42.1  | 42.1  | 42.0  | 42.0  |
| TS4                                                                                                                                                   | 39.6 <sup>a</sup>  | 59.0  | 40.5  | 36.6  | 42.2  | 44.8  | 44.4  | 34.3  | 33.7  | 33.8  | 33.7  | 33.7  | 32.8  | 32.8  |
| TS5                                                                                                                                                   | 28.2 <sup>a</sup>  | 51.7  | 42.4  | 41.6  | 43.1  | 43.9  | 39.6  | 42.0  | 42.0  | 42.1  | 37.0  | 37.0  | 37.1  | 37.1  |
| TS6                                                                                                                                                   | 35.6 <sup>a</sup>  | 60.2  | 44.8  | 44.9  | 43.3  | 36.5  | 42.4  | 41.2  | 39.5  | 40.1  | 42.9  | 42.9  | 41.3  | 41.3  |
| TS7                                                                                                                                                   | 22.1 <sup>a</sup>  | 48.6  | 23.7  | 27.4  | 26.2  | 20.2  | 29.9  | 28.5  | 24.9  | 25.3  | 28.6  | 28.6  | 24.2  | 24.2  |
| TS8                                                                                                                                                   | 18.3 <sup>a</sup>  | 55.2  | 29.0  | 32.8  | 30.4  | 24.4  | 31.5  | 27.7  | 23.8  | 24.5  | 28.4  | 28.4  | 23.7  | 23.8  |
| TS11                                                                                                                                                  | 9.8 <sup>a</sup>   | 58.9  | 38.2  | 40.9  | 33.3  | 28.9  | 34.2  | 29.4  | 23.6  | 24.9  | 30.5  | 30.5  | 24.4  | 24.5  |
| TS9                                                                                                                                                   | 23.6 <sup>a</sup>  | 45.3  | 41.7  | 44.4  | 37.9  | 29.7  | 42.5  | 38.2  | 38.5  | 38.3  | 38.4  | 38.4  | 38.6  | 38.6  |
| 13ts_1a                                                                                                                                               | 26.3 <sup>a</sup>  | 48.0  | 41.0  | 43.6  | 26.5  | 25.3  | 35.7  | 23.0  | 21.5  | 21.4  | 15.6  | 15.6  | 13.3  | 13.3  |
| 13ts_2a                                                                                                                                               | 18.1 <sup>a</sup>  | 37.7  | 39.2  | 32.5  | 21.1  | 17.7  | 28.4  | 22.3  | 20.5  | 20.4  | 12.5  | 12.5  | 9.8   | 9.8   |
| 13ts_3a                                                                                                                                               | 12.2 <sup>a</sup>  | 34.3  | 22.8  | 29.5  | 27.2  | 23.6  | 20.7  | 16.4  | 14.3  | 14.4  | 13.1  | 13.1  | 10.2  | 10.2  |
| 13ts_4a                                                                                                                                               | 11.1 <sup>a</sup>  | 36.1  | 17.2  | 35.5  | 25.7  | 21.9  | 18.5  | 11.6  | 9.8   | 9.9   | 10.9  | 10.9  | 8.4   | 8.4   |
| 13ts_5a                                                                                                                                               | 5.3 <sup>a</sup>   | 22.5  | 11.7  | 17.8  | 11.5  | 7.8   | 11.4  | 7.4   | 5.5   | 5.5   | 5.9   | 5.9   | 3.1   | 3.1   |
| 13ts_6a                                                                                                                                               | 4.0 <sup>a</sup>   | 20.4  | 6.0   | 12.4  | 9.6   | 6.6   | 11.7  | 8.3   | 6.1   | 6.2   | 10.3  | 10.3  | 7.3   | 7.4   |
| 13ts_7a                                                                                                                                               | 11.5 <sup>a</sup>  | 41.1  | 19.6  | 31.8  | 18.9  | 16.9  | 19.7  | 18.8  | 16.5  | 16.7  | 19.5  | 19.5  | 16.4  | 16.4  |
| 13ts_8a                                                                                                                                               | 4.0 <sup>a</sup>   | 33.9  | 13.9  | 21.2  | 12.9  | 8.8   | 16.8  | 14.6  | 12.0  | 12.2  | 10.9  | 10.9  | 7.4   | 7.4   |

... continued on next page ...

Table S20: ... continued from previous page ...

| Species                                                        | Ref.               | MNDO  | AMI  | PM3  | PM6   | PM7   | OM1   |      | OM2  |      | OM3   |       | OM3   |       | D3T   | D3T   |
|----------------------------------------------------------------|--------------------|-------|------|------|-------|-------|-------|------|------|------|-------|-------|-------|-------|-------|-------|
|                                                                |                    |       |      |      |       |       | OM1   | OM2  | D2   | D3   | D3T   | D2    | D3    | D3T   |       |       |
| 13ts.9a                                                        | -1.4 <sup>a</sup>  | 25.5  | 7.6  | 15.5 | 14.3  | 10.0  | 9.4   | 11.1 | 8.5  | 8.7  | 11.2  | 8.6   | 7.9   | 7.9   | 7.9   | 7.9   |
| 02ts                                                           | 15.0 <sup>a</sup>  | 56.0  | 29.6 | 33.4 | 31.1  | 24.8  | 32.7  | 28.8 | 24.7 | 25.5 | 29.2  | 25.5  | 24.5  | 24.5  | 24.5  | 24.5  |
| 04ts                                                           | 19.8 <sup>a</sup>  | 53.8  | 29.8 | 33.1 | 30.1  | 22.8  | 29.6  | 24.8 | 21.3 | 22.1 | 26.2  | 23.2  | 22.2  | 22.2  | 22.2  | 22.2  |
| 06ts                                                           | 25.4 <sup>a</sup>  | 54.8  | 35.9 | 37.1 | 36.9  | 32.0  | 36.5  | 34.6 | 30.8 | 31.6 | 34.3  | 30.9  | 30.0  | 30.0  | 30.0  | 30.0  |
| a L.Goerigk and S.Grimme, J.Chem.Theory Comput. 6, 107 (2010). |                    |       |      |      |       |       |       |      |      |      |       |       |       |       |       |       |
| BH76                                                           |                    |       |      |      |       |       |       |      |      |      |       |       |       |       |       |       |
| n2ohts                                                         | 18.1 <sup>a</sup>  | 13.2  | 6.0  | 17.0 | -5.4  | -2.9  | 11.1  | -1.3 | -1.5 | -1.7 | -4.3  | -4.4  | -4.8  | -4.8  | -4.8  | -4.8  |
| n2ohts                                                         | 83.2 <sup>a</sup>  | 86.9  | 74.4 | 73.5 | 19.1  | 35.6  | 84.0  | 68.5 | 68.2 | 67.9 | 68.8  | 68.6  | 67.9  | 67.9  | 67.9  | 67.9  |
| hfhts                                                          | 42.2 <sup>a</sup>  | 26.6  | 34.7 | 21.5 | 16.6  | 36.9  | 24.6  | -1.2 | -1.3 | -1.4 | 1.7   | 1.5   | 1.5   | 1.5   | 1.5   | 1.5   |
| hfhts                                                          | 42.2 <sup>a</sup>  | 26.6  | 34.7 | 21.5 | 16.6  | 36.9  | 24.6  | -1.2 | -1.3 | -1.4 | 1.7   | 1.5   | 1.5   | 1.5   | 1.5   | 1.5   |
| hfch3ts                                                        | 30.4 <sup>a</sup>  | 42.7  | 30.3 | 28.8 | 16.9  | 30.6  | 17.9  | 10.1 | 9.9  | 9.9  | 14.5  | 14.1  | 14.2  | 14.2  | 14.2  | 14.2  |
| hfch3ts                                                        | 57.0 <sup>a</sup>  | 68.2  | 60.5 | 60.3 | 48.6  | 66.8  | 47.3  | 30.1 | 29.7 | 29.7 | 39.5  | 39.1  | 38.9  | 38.9  | 38.9  | 38.9  |
| hf2ts                                                          | 2.3 <sup>a</sup>   | 26.8  | 3.1  | 7.1  | 13.2  | 19.3  | 9.9   | 3.6  | 3.5  | 3.5  | 6.6   | 6.5   | 6.3   | 6.3   | 6.3   | 6.3   |
| hf2ts                                                          | 106.2 <sup>a</sup> | 139.5 | 83.7 | 82.2 | 109.0 | 98.7  | 124.4 | 99.9 | 99.8 | 99.7 | 106.6 | 106.6 | 106.4 | 106.4 | 106.4 | 106.4 |
| fch3fts                                                        | -0.3 <sup>a</sup>  | 46.4  | 32.6 | 39.9 | 13.8  | 24.5  | 9.0   | 13.7 | 13.2 | 13.4 | 18.0  | 17.5  | 17.5  | 17.5  | 17.5  | 17.5  |
| fch3fts                                                        | -0.3 <sup>a</sup>  | 46.4  | 32.6 | 39.9 | 13.8  | 24.5  | 9.0   | 13.7 | 13.2 | 13.4 | 18.0  | 17.5  | 17.5  | 17.5  | 17.5  | 17.5  |
| fch3fts                                                        | 13.4 <sup>a</sup>  | 45.7  | 41.3 | 45.5 | 21.0  | 32.1  | 20.5  | 22.5 | 22.6 | 22.5 | 26.1  | 26.3  | 26.1  | 26.1  | 26.1  | 26.1  |
| fch3fts                                                        | 13.4 <sup>a</sup>  | 45.7  | 41.3 | 45.5 | 21.0  | 32.1  | 20.5  | 22.5 | 22.6 | 22.5 | 26.1  | 26.3  | 26.1  | 26.1  | 26.1  | 26.1  |
| hoch3fts                                                       | -2.8 <sup>a</sup>  | 43.2  | 31.1 | 28.4 | -4.5  | 2.4   | 3.0   | 11.4 | 10.7 | 10.8 | 11.7  | 10.9  | 10.8  | 10.8  | 10.8  | 10.8  |
| hoch3fts                                                       | 17.3 <sup>a</sup>  | 51.7  | 9.8  | 40.6 | 20.4  | 28.5  | 26.0  | 26.6 | 26.1 | 26.2 | 31.1  | 30.5  | 30.5  | 30.5  | 30.5  | 30.5  |
| hoch3fts                                                       | 11.0 <sup>a</sup>  | 43.8  | 40.1 | 33.9 | 7.0   | 14.3  | 13.7  | 20.7 | 20.5 | 20.6 | 20.8  | 20.5  | 20.5  | 20.5  | 20.5  | 20.5  |
| hoch3fts                                                       | 47.2 <sup>a</sup>  | 65.4  | 40.7 | 69.5 | 39.5  | 38.1  | 56.7  | 57.2 | 57.1 | 57.2 | 63.4  | 63.2  | 63.4  | 63.4  | 63.4  | 63.4  |
| hn2ts                                                          | 14.7 <sup>a</sup>  | 11.9  | 5.7  | 3.4  | -4.0  | -2.0  | 14.3  | 2.5  | 2.3  | 2.2  | -7.0  | -7.0  | -7.4  | -7.4  | -7.4  | -7.4  |
| hn2ts                                                          | 10.7 <sup>a</sup>  | 23.9  | 22.7 | 22.8 | 25.1  | 24.7  | 17.1  | 9.5  | 9.5  | 9.4  | 13.4  | 13.3  | 13.2  | 13.2  | 13.2  | 13.2  |
| hcots                                                          | 3.2 <sup>a</sup>   | 3.9   | 0.1  | -0.4 | 7.5   | 7.3   | 4.6   | -1.8 | -1.9 | -2.1 | -0.8  | -0.9  | -1.3  | -1.3  | -1.3  | -1.3  |
| hcots                                                          | 22.7 <sup>a</sup>  | 48.0  | 46.6 | 39.5 | 45.5  | 40.0  | 31.9  | 31.5 | 31.5 | 31.4 | 36.0  | 35.9  | 35.7  | 35.7  | 35.7  | 35.7  |
| c2h5ts                                                         | 1.7 <sup>a</sup>   | 10.8  | 4.9  | 6.5  | 11.9  | 11.5  | 8.9   | 4.2  | 3.8  | 3.7  | 4.8   | 4.3   | 4.0   | 4.0   | 4.0   | 4.0   |
| c2h5ts                                                         | 41.8 <sup>a</sup>  | 65.2  | 54.1 | 57.5 | 62.2  | 60.2  | 47.3  | 43.5 | 43.5 | 43.3 | 45.6  | 45.4  | 45.3  | 45.3  | 45.3  | 45.3  |
| c3h7ts                                                         | 6.8 <sup>a</sup>   | 22.5  | 10.9 | 11.7 | 12.3  | 9.3   | 11.8  | 10.5 | 9.2  | 9.3  | 10.3  | 9.0   | 8.6   | 8.6   | 8.6   | 8.6   |
| c3h7ts                                                         | 33.0 <sup>a</sup>  | 55.4  | 44.4 | 44.4 | 42.8  | 38.0  | 39.7  | 35.0 | 35.1 | 34.9 | 37.7  | 37.4  | 37.6  | 37.6  | 37.6  | 37.6  |
| hcnts                                                          | 48.2 <sup>a</sup>  | 97.6  | 89.0 | 75.1 | 90.4  | 91.0  | 76.4  | 89.8 | 89.9 | 89.8 | 76.9  | 77.0  | 76.9  | 76.9  | 76.9  | 76.9  |
| hcnts                                                          | 33.1 <sup>a</sup>  | 64.6  | 70.8 | 51.2 | 77.1  | 81.8  | 67.2  | 72.1 | 72.2 | 72.2 | 75.1  | 75.1  | 75.1  | 75.1  | 75.1  | 75.1  |
| RKT02                                                          | 5.1 <sup>a</sup>   | 34.3  | 15.7 | 17.0 | 0.1   | 5.0   | 20.8  | 5.2  | 5.0  | 4.9  | 2.7   | 2.4   | 2.2   | 2.2   | 2.2   | 2.2   |
| RKT02                                                          | 21.2 <sup>a</sup>  | 46.9  | 20.3 | 9.1  | -8.9  | -13.2 | 32.2  | 12.6 | 12.4 | 12.4 | 12.2  | 12.0  | 11.9  | 11.9  | 11.9  | 11.9  |
| RKT03                                                          | 12.1 <sup>a</sup>  | 28.2  | 18.1 | 15.2 | 23.1  | 25.8  | 9.0   | 5.2  | 4.8  | 4.7  | 0.7   | 0.2   | -0.1  | -0.1  | -0.1  | -0.1  |
| RKT03                                                          | 15.3 <sup>a</sup>  | 16.2  | 1.5  | -6.7 | -13.3 | -14.9 | 10.1  | 4.2  | 3.9  | 3.8  | 2.1   | 1.7   | 1.5   | 1.5   | 1.5   | 1.5   |
| RKT04                                                          | 6.7 <sup>a</sup>   | 34.5  | 14.3 | 14.6 | 1.4   | 5.7   | 19.1  | 2.9  | 2.3  | 2.3  | 3.7   | 3.2   | 3.0   | 3.0   | 3.0   | 3.0   |
| RKT04                                                          | 19.6 <sup>a</sup>  | 59.1  | 35.6 | 28.6 | 28.9  | 28.3  | 29.3  | 11.3 | 10.6 | 10.7 | 11.9  | 11.3  | 11.0  | 11.0  | 11.0  | 11.0  |
| RKT06                                                          | 9.6 <sup>a</sup>   | 14.1  | 4.4  | -8.0 | -8.2  | -8.2  | 0.9   | 1.3  | 1.2  | 1.0  | -5.1  | -5.2  | -5.6  | -5.6  | -5.6  | -5.6  |
| RKT06                                                          | 9.6 <sup>a</sup>   | 14.1  | 4.4  | -8.0 | -8.2  | -8.2  | 0.9   | 1.3  | 1.2  | 1.0  | -5.1  | -5.2  | -5.6  | -5.6  | -5.6  | -5.6  |
| RKT07                                                          | 3.2 <sup>a</sup>   | 43.3  | 26.4 | 19.2 | 2.2   | 6.0   | 21.7  | 8.9  | 8.4  | 8.4  | 4.3   | 3.7   | 3.5   | 3.5   | 3.5   | 3.5   |
| RKT07                                                          | 12.7 <sup>a</sup>  | 61.4  | 40.5 | 35.8 | 22.8  | 24.4  | 36.8  | 17.3 | 16.7 | 16.7 | 15.3  | 14.7  | 14.5  | 14.5  | 14.5  | 14.5  |
| RKT09                                                          | 3.4 <sup>a</sup>   | 35.3  | 15.1 | 13.4 | -0.6  | 4.0   | 18.8  | 0.7  | 0.1  | 0.1  | 1.9   | 1.3   | 1.0   | 1.0   | 1.0   | 1.0   |
| RKT09                                                          | 19.9 <sup>a</sup>  | 64.8  | 40.2 | 34.3 | 34.4  | 33.8  | 34.2  | 16.2 | 15.2 | 15.4 | 17.9  | 16.9  | 16.7  | 16.7  | 16.7  | 16.7  |
| RKT10                                                          | 1.8 <sup>a</sup>   | 25.1  | 12.4 | 2.1  | 1.1   | 11.4  | 10.0  | 4.8  | 4.6  | 4.6  | 7.0   | 6.9   | 6.8   | 6.8   | 6.8   | 6.8   |

... continued on next page ...

Table S20: ... continued from previous page ...

| Species | Ref.              | MNDO | AMI  | PM3  | PM6   | PM7   | OM1  | OM2  |      | OM3  |      | OM3  | D3   | D3T  | OM3  | D3   | D3T  |
|---------|-------------------|------|------|------|-------|-------|------|------|------|------|------|------|------|------|------|------|------|
|         |                   |      |      |      |       |       |      | D2   | D3   | D2   | D3   |      |      |      |      |      |      |
| RKT10   | 33.4 <sup>a</sup> | 53.0 | 44.7 | 18.5 | 4.3   | 8.1   | 47.7 | 31.0 | 30.9 | 30.9 | 30.9 | 38.2 | 38.1 | 30.9 | 38.0 | 38.0 | 38.0 |
| RKT11   | 13.7 <sup>a</sup> | 28.6 | 10.4 | 12.3 | 13.0  | 12.2  | 18.3 | 2.5  | 2.2  | 2.2  | 2.2  | 2.4  | 2.0  | 2.2  | 1.9  | 1.9  | 1.9  |
| RKT11   | 8.1 <sup>a</sup>  | 49.8 | 29.8 | 25.5 | 17.1  | 20.8  | 23.0 | 3.4  | 2.9  | 2.9  | 2.9  | 3.4  | 2.9  | 2.9  | 2.7  | 2.7  | 2.7  |
| RKT14   | 10.7 <sup>a</sup> | 37.6 | 16.6 | 9.3  | -18.0 | -16.7 | 22.1 | 1.2  | 1.1  | 1.0  | 1.0  | -0.1 | -0.2 | 1.0  | -0.5 | -0.5 | -0.5 |
| RKT14   | 13.1 <sup>a</sup> | 28.4 | 13.9 | 18.0 | 14.4  | 15.5  | 16.2 | 1.4  | 1.3  | 1.2  | 1.2  | -2.6 | -2.6 | 1.2  | -2.9 | -2.9 | -2.9 |
| RKT18   | 8.0 <sup>a</sup>  | 35.7 | 22.4 | 17.6 | 20.0  | 21.7  | 19.0 | 7.8  | 7.1  | 7.2  | 7.2  | 2.9  | 2.1  | 7.2  | 1.9  | 1.9  | 1.9  |
| RKT18   | 22.4 <sup>a</sup> | 33.1 | 21.9 | 22.2 | 22.5  | 26.1  | 31.4 | 23.6 | 23.0 | 22.9 | 22.9 | 16.6 | 15.8 | 22.9 | 15.7 | 15.7 | 15.7 |
| RKT19   | 7.5 <sup>a</sup>  | 40.9 | 26.3 | 22.4 | 24.8  | 26.4  | 22.4 | 11.1 | 10.0 | 10.1 | 10.1 | 6.7  | 5.6  | 10.1 | 5.4  | 5.4  | 5.4  |
| RKT19   | 18.3 <sup>a</sup> | 33.5 | 21.9 | 20.0 | 19.8  | 23.6  | 29.6 | 19.8 | 19.1 | 19.0 | 19.0 | 12.5 | 11.8 | 19.0 | 11.5 | 11.5 | 11.5 |
| RKT20   | 10.4 <sup>a</sup> | 34.9 | 20.9 | 21.2 | 16.9  | 20.7  | 26.5 | 14.7 | 13.8 | 13.8 | 13.8 | 9.5  | 8.5  | 13.9 | 8.2  | 8.2  | 8.2  |
| RKT20   | 17.4 <sup>a</sup> | 46.3 | 31.9 | 25.5 | 31.3  | 32.2  | 26.7 | 21.9 | 20.7 | 20.9 | 20.9 | 14.4 | 13.1 | 20.9 | 13.0 | 13.0 | 13.0 |
| RKT21   | 14.5 <sup>a</sup> | 35.3 | 21.5 | 23.6 | 19.2  | 23.2  | 28.4 | 18.2 | 17.4 | 17.5 | 17.5 | 12.9 | 12.0 | 17.5 | 11.8 | 11.8 | 11.8 |
| RKT21   | 17.8 <sup>a</sup> | 41.8 | 28.7 | 20.9 | 26.1  | 27.4  | 23.4 | 18.3 | 17.5 | 17.6 | 17.6 | 10.0 | 9.1  | 17.6 | 8.9  | 8.9  | 8.9  |
| RKT22   | 38.4 <sup>a</sup> | 59.4 | 40.6 | 36.9 | 42.3  | 44.9  | 44.3 | 34.7 | 34.0 | 34.2 | 34.2 | 33.8 | 33.5 | 34.2 | 32.9 | 32.9 | 33.0 |
| RKT22   | 38.4 <sup>a</sup> | 59.4 | 40.6 | 36.9 | 42.3  | 44.9  | 44.3 | 34.7 | 34.0 | 34.2 | 34.2 | 33.8 | 33.5 | 34.2 | 32.9 | 32.9 | 33.0 |

a L.Goerigk and S.Grimme, J.Chem.Theory Comput. 6, 107 (2010) ; Y.Zhao, B.J.Lynch, D.G.Truhlar, J.Phys.Chem.A 108, 2715 (2004) ;  
Y.Zhao, N.González-García, and D.G.Truhlar, J.Phys.Chem.A 109, 2012 (2005).

---

| Species     | Ref.                | MNDO   | AMI   | PM3   | PM6   | PM7   | OM1    | OM2   |       | OM3   |       | OM3    | D3     | D3T   | OM3    | D3     | D3T    |
|-------------|---------------------|--------|-------|-------|-------|-------|--------|-------|-------|-------|-------|--------|--------|-------|--------|--------|--------|
|             |                     |        |       |       |       |       |        | D2    | D3    | D2    | D3    |        |        |       |        |        |        |
| h           | -65.1 <sup>a</sup>  | -73.7  | -68.4 | -56.5 | -24.5 | -38.4 | -72.9  | -69.8 | -69.7 | -69.6 | -69.6 | -73.0  | -73.0  | -69.6 | -72.7  | -72.7  | -72.7  |
| h           | -26.6 <sup>a</sup>  | -25.5  | -30.2 | -31.4 | -31.7 | -36.2 | -29.3  | -20.0 | -19.7 | -19.8 | -19.8 | -25.0  | -24.9  | -19.8 | -24.7  | -24.7  | -24.7  |
| h           | -103.9 <sup>a</sup> | -112.7 | -80.6 | -75.2 | -95.8 | -79.3 | -114.5 | -96.2 | -96.2 | -96.2 | -96.2 | -100.1 | -100.1 | -96.2 | -100.0 | -100.0 | -100.0 |
| oh-         | -20.1 <sup>a</sup>  | -8.5   | 21.4  | -12.2 | -24.9 | -26.1 | -23.0  | -15.2 | -15.4 | -15.4 | -15.4 | -19.4  | -19.6  | -15.4 | -19.7  | -19.7  | -19.7  |
| hoch3fcomp2 | -36.2 <sup>a</sup>  | -21.6  | -0.5  | -35.7 | -32.4 | -23.8 | -43.0  | -36.5 | -36.6 | -36.6 | -36.6 | -42.6  | -42.7  | -36.6 | -42.9  | -42.9  | -42.9  |
| h           | 4.0 <sup>a</sup>    | -12.0  | -17.0 | -19.4 | -29.1 | -26.7 | -2.8   | -7.1  | -7.1  | -7.1  | -7.1  | -20.3  | -20.3  | -7.1  | -20.6  | -20.6  | -20.6  |
| h           | -19.5 <sup>a</sup>  | -44.2  | -46.6 | -40.0 | -37.9 | -32.7 | -27.3  | -33.3 | -33.4 | -33.4 | -33.4 | -36.7  | -36.8  | -33.4 | -37.0  | -37.0  | -37.0  |
| h           | -40.0 <sup>a</sup>  | -54.4  | -49.2 | -51.0 | -50.3 | -48.7 | -38.4  | -39.3 | -39.7 | -39.6 | -39.6 | -40.8  | -41.1  | -39.6 | -41.2  | -41.2  | -41.2  |
| ch3         | -26.1 <sup>a</sup>  | -32.9  | -33.5 | -32.7 | -30.5 | -28.7 | -27.9  | -24.5 | -25.9 | -25.6 | -25.6 | -27.3  | -28.4  | -25.6 | -29.0  | -29.0  | -29.0  |
| hnc         | -15.1 <sup>a</sup>  | -33.0  | -18.2 | -23.9 | -13.4 | -9.2  | -9.2   | -17.7 | -17.7 | -17.6 | -17.6 | -1.9   | -1.9   | -17.6 | -1.8   | -1.8   | -1.8   |
| OH          | -16.1 <sup>a</sup>  | -12.6  | -4.6  | 7.9   | 9.0   | 18.2  | -11.3  | -7.4  | -7.4  | -7.5  | -7.5  | -9.6   | -9.6   | -7.5  | -9.7   | -9.7   | -9.7   |
| CH3         | -3.2 <sup>a</sup>   | 12.0   | 16.6  | 21.9  | 36.4  | 40.8  | -1.1   | 1.1   | 0.9   | 0.9   | 0.9   | -1.4   | -1.5   | 0.9   | -1.6   | -1.6   | -1.6   |
| OH          | -12.9 <sup>a</sup>  | -24.6  | -21.3 | -14.0 | -27.5 | -22.5 | -10.2  | -8.5  | -8.3  | -8.4  | -8.4  | -8.2   | -8.1   | -8.4  | -8.0   | -8.0   | -8.0   |
| OH          | -9.5 <sup>a</sup>   | -18.1  | -14.1 | -16.6 | -20.6 | -18.4 | -15.2  | -8.3  | -8.3  | -8.3  | -8.3  | -11.0  | -11.0  | -8.3  | -11.0  | -11.0  | -11.0  |
| OH          | -16.5 <sup>a</sup>  | -29.5  | -25.1 | -20.9 | -35.0 | -29.8 | -15.4  | -15.5 | -15.1 | -15.3 | -15.3 | -16.0  | -15.6  | -15.3 | -15.7  | -15.7  | -15.7  |
| F           | -31.6 <sup>a</sup>  | -27.9  | -32.3 | -16.5 | -3.2  | 3.3   | -37.7  | -26.2 | -26.2 | -26.2 | -26.2 | -31.2  | -31.2  | -26.2 | -31.2  | -31.2  | -31.2  |
| O           | 5.6 <sup>a</sup>    | -21.2  | -19.4 | -13.2 | -4.1  | -8.6  | -4.7   | -0.8  | -0.7  | -0.7  | -0.7  | -1.0   | -0.9   | -0.7  | -0.8   | -0.8   | -0.8   |
| H           | -2.4 <sup>a</sup>   | 9.2    | 2.7   | -8.8  | -32.3 | -32.2 | 5.9    | -0.2  | -0.2  | -0.2  | -0.2  | 2.4    | 2.4    | -0.2  | 2.5    | 2.5    | 2.5    |
| NH2         | -14.4 <sup>a</sup>  | 2.6    | 0.6   | -4.6  | -2.5  | -4.4  | -12.4  | -15.7 | -15.8 | -15.8 | -15.8 | -13.7  | -13.8  | -15.8 | -13.8  | -13.8  | -13.8  |
| NH2         | -10.8 <sup>a</sup>  | 7.4    | 4.4   | 2.4   | 5.0   | 2.8   | -7.2   | -8.7  | -9.0  | -8.9  | -8.9  | -6.1   | -6.2   | -8.9  | -6.1   | -6.1   | -6.1   |
| C2H6        | -7.0 <sup>a</sup>   | -11.4  | -11.0 | -4.3  | -14.4 | -11.5 | -0.2   | -7.2  | -6.9  | -7.0  | -7.0  | -4.9   | -4.6   | -7.0  | -4.7   | -4.7   | -4.7   |
| NH2         | -3.3 <sup>a</sup>   | -6.5   | -7.2  | 2.7   | -6.9  | -4.2  | 4.9    | -0.1  | -0.1  | -0.1  | -0.1  | 2.9    | 2.9    | -0.1  | 2.9    | 2.9    | 2.9    |

a L.Goerigk and S.Grimme, J.Chem.Theory Comput. 6, 107 (2010) ; Y.Zhao, B.J.Lynch, D.G.Truhlar, J.Phys.Chem.A 108, 2715 (2004) ;  
Y.Zhao, N.González-García, and D.G.Truhlar, J.Phys.Chem.A 109, 2012 (2005).

---

| Species | Ref.               | MNDO | AMI  | PM3  | PM6  | PM7  | OM1  | OM2  | OM3  | D3   | D3T  | OM3  | D3   | D3T  | OM3  | D3   | D3T  |
|---------|--------------------|------|------|------|------|------|------|------|------|------|------|------|------|------|------|------|------|
| E2      | -15.2 <sup>a</sup> | -2.1 | -2.7 | -4.5 | -3.9 | -5.3 | -6.7 | -8.9 | -8.7 | -8.7 | -8.7 | -8.6 | -8.4 | -8.4 | -8.4 | -8.4 | -8.4 |

... continued on next page ...

Table S20: ... continued from previous page ...

| Species | Ref.               | MNDO  | AMI   | PM3   | PM6   | PM7   | OM2   |       |       | OM3   |       |       |       |
|---------|--------------------|-------|-------|-------|-------|-------|-------|-------|-------|-------|-------|-------|-------|
|         |                    |       |       |       |       |       | OM1   | D2    | D3    | D3T   | OM3   | D2    | D3    |
| E3      | 1.9 <sup>a</sup>   | 7.0   | 8.5   | 4.5   | 2.2   | 1.1   | 6.2   | 1.8   | 2.0   | 2.0   | -1.0  | -0.7  | -0.6  |
| E4      | 6.8 <sup>a</sup>   | 12.6  | 9.4   | 6.6   | 7.1   | 5.4   | 1.6   | -1.3  | -1.1  | -1.2  | -4.6  | -4.5  | -4.5  |
| E6      | 0.1 <sup>a</sup>   | -4.5  | -0.2  | -2.9  | -2.2  | -2.0  | -1.3  | -3.4  | -3.0  | -3.2  | -2.6  | -2.1  | -2.4  |
| E7      | 1.4 <sup>a</sup>   | -4.5  | 1.0   | -2.2  | -2.2  | -1.4  | -0.4  | -2.3  | -2.0  | -2.2  | -1.3  | -0.9  | -1.1  |
| E9      | -1.3 <sup>a</sup>  | -2.7  | -0.2  | -2.7  | -2.9  | -2.3  | -2.3  | -4.1  | -3.8  | -4.0  | -3.6  | -3.3  | -3.5  |
| E10     | -1.8 <sup>a</sup>  | -5.3  | -3.3  | -7.0  | -6.2  | -6.6  | -4.4  | -6.3  | -6.1  | -6.2  | -7.0  | -6.7  | -6.8  |
| E11     | -17.5 <sup>a</sup> | -7.6  | -8.1  | -9.6  | -8.9  | -10.5 | -13.0 | -15.1 | -14.9 | -15.0 | -14.9 | -14.7 | -14.8 |
| E12     | -10.0 <sup>a</sup> | -3.1  | -2.0  | -3.3  | -0.5  | -1.9  | -4.7  | -8.3  | -8.1  | -8.2  | -6.9  | -6.8  | -6.8  |
| E13     | -8.6 <sup>a</sup>  | -3.5  | -2.3  | -4.2  | -3.1  | -4.3  | -5.0  | -7.3  | -7.2  | -7.3  | -8.2  | -8.1  | -8.1  |
| E15     | -6.3 <sup>a</sup>  | -4.2  | -1.2  | -4.4  | -0.8  | -1.6  | -2.5  | -5.3  | -5.1  | -5.1  | -4.5  | -4.3  | -4.3  |
| E16     | -6.3 <sup>a</sup>  | -4.2  | -0.9  | -4.2  | -0.4  | -1.3  | -2.5  | -5.2  | -4.9  | -5.0  | -4.3  | -4.0  | -4.1  |
| E17     | -6.6 <sup>a</sup>  | -3.6  | -0.5  | -3.5  | -0.2  | -1.3  | -2.5  | -5.0  | -4.8  | -4.9  | -4.5  | -4.3  | -4.4  |
| E18     | -6.4 <sup>a</sup>  | -3.8  | -0.5  | -3.5  | -0.1  | -1.2  | -2.5  | -4.9  | -4.8  | -4.8  | -4.5  | -4.3  | -4.3  |
| E19     | -3.0 <sup>a</sup>  | -5.7  | -3.3  | -5.7  | -5.9  | -6.0  | -4.6  | -6.1  | -5.7  | -5.9  | -6.6  | -6.1  | -6.3  |
| E20     | -3.9 <sup>a</sup>  | -9.2  | -8.9  | -9.2  | -6.5  | -9.0  | -6.7  | -6.7  | -6.7  | -6.7  | -9.2  | -9.2  | -9.2  |
| E21     | -12.0 <sup>a</sup> | -9.0  | -15.5 | -15.6 | -19.7 | -20.1 | -15.7 | -20.0 | -19.8 | -19.9 | -22.8 | -22.6 | -22.7 |
| E22     | 4.7 <sup>a</sup>   | -3.6  | -2.8  | -5.6  | -3.1  | -3.0  | -2.8  | -3.7  | -3.4  | -3.6  | -4.9  | -4.6  | -4.7  |
| E23     | -12.6 <sup>a</sup> | -9.5  | -13.8 | -13.9 | -19.6 | -19.7 | -16.5 | -18.7 | -18.5 | -18.6 | -22.3 | -21.9 | -22.1 |
| E24     | -11.1 <sup>a</sup> | -10.4 | -13.6 | -14.8 | -16.6 | -18.0 | -13.5 | -16.2 | -16.0 | -16.1 | -17.2 | -17.0 | -17.1 |
| E25     | -8.6 <sup>a</sup>  | -5.7  | -8.0  | -11.5 | -13.9 | -14.1 | -11.3 | -15.4 | -15.2 | -15.3 | -17.2 | -16.9 | -17.0 |
| E26     | -12.8 <sup>a</sup> | -11.0 | -12.6 | -13.1 | -19.3 | -18.9 | -17.2 | -17.6 | -17.1 | -17.3 | -21.8 | -21.2 | -21.4 |
| E27     | -3.3 <sup>a</sup>  | -0.6  | 1.0   | -3.3  | -0.7  | -3.3  | -2.3  | -6.3  | -6.2  | -6.2  | -4.7  | -4.5  | -4.6  |
| E28     | -3.9 <sup>a</sup>  | -11.4 | -5.8  | -11.1 | 35.0  | 28.7  | -8.4  | -10.0 | -9.8  | -9.9  | -10.7 | -10.4 | -10.5 |
| E29     | -2.7 <sup>a</sup>  | -8.8  | -1.6  | -6.1  | -6.7  | -6.5  | -8.3  | -8.1  | -7.9  | -8.0  | -8.6  | -8.2  | -8.4  |
| E30     | -5.9 <sup>a</sup>  | -9.6  | -5.2  | -10.5 | -9.4  | -10.0 | -8.7  | -10.5 | -10.3 | -10.4 | -10.4 | -10.2 | -10.3 |
| E31     | -6.2 <sup>a</sup>  | -9.1  | -4.9  | -9.9  | -9.3  | -9.8  | -8.5  | -9.9  | -9.6  | -9.7  | -10.2 | -9.8  | -9.9  |
| E32     | -4.2 <sup>a</sup>  | -8.0  | -3.5  | -9.4  | -8.3  | -8.5  | -9.4  | -9.7  | -9.6  | -9.7  | -10.7 | -10.6 | -10.7 |
| E40     | -22.5 <sup>a</sup> | -16.5 | -22.0 | -22.9 | -27.6 | -29.6 | -18.7 | -27.1 | -26.8 | -26.9 | -28.6 | -28.3 | -28.4 |
| E41     | -24.1 <sup>a</sup> | -18.8 | -22.1 | -27.6 | -28.6 | -29.5 | -21.4 | -29.7 | -29.3 | -29.4 | -29.7 | -29.3 | -29.4 |
| E42     | -25.4 <sup>a</sup> | -17.4 | -23.1 | -25.5 | -29.4 | -31.0 | -21.7 | -31.7 | -31.4 | -31.5 | -33.1 | -32.7 | -32.8 |
| E43     | -13.1 <sup>a</sup> | -4.1  | -5.0  | -5.6  | -6.6  | -8.5  | -9.1  | -11.0 | -10.9 | -11.0 | -11.2 | -11.1 | -11.1 |
| E44     | -6.4 <sup>a</sup>  | -18.6 | -12.1 | -18.7 | -18.7 | -18.6 | -12.7 | -17.5 | -16.6 | -17.1 | -19.4 | -18.3 | -18.8 |
| E45     | -2.3 <sup>a</sup>  | -6.1  | -2.4  | -5.2  | -4.9  | -5.3  | -5.0  | -6.4  | -5.8  | -6.1  | -6.7  | -6.0  | -6.3  |

a L.Goerigk and S.Grimme, J.Chem.Theory Comput. 6, 107 (2010) ;  
 F.Neese, T.Schwabe, S.Kossmann, B.Schirmer, and S.Grimme, J.Chem.Theory Comput. 5, 3060 (2009).

O3ADD6

|              |                    |       |       |       |       |       |       |       |       |       |       |       |       |
|--------------|--------------------|-------|-------|-------|-------|-------|-------|-------|-------|-------|-------|-------|-------|
| o3.c2h2.vdwr | -1.9 <sup>a</sup>  | 3.7   | 1.2   | 1.5   | 0.0   | -0.5  | -0.7  | -1.3  | -2.0  | -2.0  | -1.1  | -1.9  | -2.0  |
| o3.c2h2.ts   | 7.7 <sup>a</sup>   | 42.8  | 21.7  | 21.9  | 11.6  | 14.7  | 14.1  | -3.8  | -4.9  | -4.8  | 3.6   | 2.9   | 1.9   |
| o3.c2h2.add  | -63.8 <sup>a</sup> | -62.6 | -39.8 | -73.5 | -65.4 | -65.9 | -64.2 | -35.9 | -36.8 | -36.9 | -19.2 | -19.5 | -20.6 |
| o3.c2h4.vdwr | -1.9 <sup>a</sup>  | 6.4   | 2.1   | 2.4   | 0.3   | 138.3 | -0.2  | -1.6  | -2.5  | -2.5  | -1.0  | -2.1  | -2.2  |
| o3.c2h4.ts   | 3.4 <sup>a</sup>   | 40.3  | 12.9  | 18.0  | 5.1   | 9.1   | 11.3  | -5.0  | -6.5  | -6.4  | 2.0   | 0.7   | -0.0  |
| o3.c2h4.add  | -57.1 <sup>a</sup> | -55.0 | -48.4 | -70.2 | -58.0 | -52.5 | -63.6 | -81.9 | -83.2 | -82.9 | -71.1 | -71.9 | -72.7 |

a L.Goerigk and S.Grimme, J.Chem.Theory Comput. 6, 107 (2010) ;  
 Y.Zhao, O.Tishchenko, J.R.Gour, W.Li, J.J.Lutz, P.Piecuch, and D.J.Truhlar, J.Phys.Chem.A 113, 5786 (2009).

... continued on next page ...

Table S20: ... continued from previous page ...

| Species                                                                                                                                                    | Ref.                | MNDO   | AMI    | PM3    | PM6    | PM7    | OM1    | OM2    |        | OM3    |        | D3T    | D3     | OM3    | D3     | D3T    |
|------------------------------------------------------------------------------------------------------------------------------------------------------------|---------------------|--------|--------|--------|--------|--------|--------|--------|--------|--------|--------|--------|--------|--------|--------|--------|
|                                                                                                                                                            |                     |        |        |        |        |        |        | D2     | D3     | D2     | D3     |        |        |        |        |        |
| 40                                                                                                                                                         | -2.0 <sup>a</sup>   | -18.8  | -13.2  | 4.3    | 24.4   | 28.5   | -3.7   | -5.5   | -5.9   | -5.9   | -1.3   | -5.9   | -1.6   | -2.0   | -2.0   | -2.0   |
| 113                                                                                                                                                        | -2.5 <sup>a</sup>   | 26.1   | 29.4   | 11.2   | 12.0   | 8.1    | 1.4    | 6.7    | 7.5    | 7.5    | 10.2   | 7.5    | 10.6   | 11.4   | 11.4   | 11.4   |
| 30                                                                                                                                                         | -7.0 <sup>a</sup>   | -6.0   | -19.2  | -23.7  | -42.4  | -40.3  | -0.6   | -5.0   | -5.1   | -5.1   | -8.5   | -5.1   | -8.5   | -8.6   | -8.6   | -8.6   |
| 100                                                                                                                                                        | -20.1 <sup>a</sup>  | -3.6   | -9.3   | -17.6  | -20.4  | -16.7  | -7.1   | -11.7  | -12.8  | -12.7  | -17.8  | -12.7  | -18.8  | -19.4  | -19.3  | -19.3  |
| 25                                                                                                                                                         | -25.4 <sup>a</sup>  | -31.7  | -19.4  | -16.2  | -27.3  | -27.5  | -17.5  | -25.0  | -25.6  | -25.6  | -22.8  | -25.6  | -23.2  | -23.7  | -23.7  | -23.7  |
| 32                                                                                                                                                         | -29.2 <sup>a</sup>  | -26.4  | -21.8  | -4.6   | -1.8   | 8.9    | -18.6  | -15.7  | -16.2  | -16.1  | -16.9  | -16.1  | -17.3  | -17.5  | -17.5  | -17.5  |
| 25                                                                                                                                                         | -32.7 <sup>a</sup>  | -41.9  | -24.7  | -29.4  | -38.9  | -34.2  | -26.3  | -26.5  | -28.2  | -27.9  | -28.7  | -27.9  | -30.0  | -30.8  | -30.8  | -30.8  |
| 34                                                                                                                                                         | -38.9 <sup>a</sup>  | -29.9  | -14.8  | 14.7   | 28.5   | 53.5   | 10.6   | -7.2   | -7.5   | -7.7   | -36.2  | -7.7   | -36.3  | -37.0  | -37.0  | -37.0  |
| 25                                                                                                                                                         | -48.4 <sup>a</sup>  | -45.1  | -34.3  | -21.3  | -15.7  | -11.8  | -44.4  | -40.8  | -41.2  | -41.3  | -42.4  | -41.3  | -42.8  | -43.3  | -43.3  | -43.3  |
| 30                                                                                                                                                         | -64.8 <sup>a</sup>  | -77.5  | -54.0  | -8.8   | 23.4   | 41.4   | 48.6   | -52.3  | -52.8  | -52.8  | -58.6  | -52.8  | -59.0  | -59.5  | -59.5  | -59.5  |
| 73                                                                                                                                                         | -68.7 <sup>a</sup>  | -84.8  | -91.5  | -57.2  | -33.4  | -45.7  | -63.7  | -59.0  | -58.9  | -58.9  | -64.9  | -58.9  | -64.9  | -64.9  | -64.9  | -64.9  |
| 68                                                                                                                                                         | -80.7 <sup>a</sup>  | -85.9  | -72.6  | -48.5  | -15.0  | -19.5  | -84.2  | -77.6  | -77.5  | -77.5  | -81.2  | -77.5  | -81.2  | -81.0  | -81.0  | -81.0  |
| 26                                                                                                                                                         | -109.1 <sup>a</sup> | -111.0 | -109.4 | -112.7 | -111.0 | -105.6 | -106.4 | -107.5 | -108.8 | -108.4 | -105.7 | -108.4 | -106.6 | -107.2 | -107.1 | -107.1 |
| 1                                                                                                                                                          | -134.3 <sup>a</sup> | -143.0 | -111.0 | -92.5  | -99.8  | -75.4  | -153.4 | -123.9 | -123.9 | -123.9 | -132.6 | -123.9 | -132.6 | -132.6 | -132.6 | -132.6 |
| 25                                                                                                                                                         | -151.6 <sup>a</sup> | -151.3 | -141.5 | -128.5 | -147.3 | -150.9 | -144.2 | -148.1 | -151.2 | -151.2 | -149.4 | -151.2 | -151.1 | -154.3 | -154.3 | -154.3 |
| a L.Goerigk and S.Grimme, J.Chem.Theory Comput. 6, 107 (2010) ;<br>L.A.Curtiss, K.Raghavachari, P.C.Redfern, and J.A.Pople, J.Chem.Phys. 106, 1063 (1997). |                     |        |        |        |        |        |        |        |        |        |        |        |        |        |        |        |
| ISO34                                                                                                                                                      |                     |        |        |        |        |        |        |        |        |        |        |        |        |        |        |        |
| P1                                                                                                                                                         | 1.6 <sup>a</sup>    | 2.3    | 1.7    | 6.5    | -8.1   | -9.5   | -0.5   | -0.2   | -0.2   | -0.3   | -0.2   | -0.3   | -0.2   | -0.3   | -0.3   | -0.3   |
| P2                                                                                                                                                         | 21.9 <sup>a</sup>   | 28.1   | 31.4   | 28.8   | 16.4   | 18.0   | 18.0   | 22.5   | 22.4   | 22.5   | 20.8   | 22.5   | 20.6   | 20.6   | 20.6   | 20.6   |
| P3                                                                                                                                                         | 7.2 <sup>a</sup>    | 7.2    | 11.1   | 10.6   | 6.0    | 8.1    | 2.5    | 4.8    | 4.5    | 4.8    | 5.0    | 4.8    | 4.9    | 5.0    | 5.0    | 5.0    |
| P4                                                                                                                                                         | 1.0 <sup>a</sup>    | 1.3    | 1.3    | 1.1    | 1.0    | 1.2    | 1.7    | 2.1    | 1.9    | 2.0    | 2.1    | 2.0    | 1.8    | 1.9    | 1.9    | 1.9    |
| E4                                                                                                                                                         | 0.9 <sup>a</sup>    | -3.0   | -1.7   | 0.0    | 1.9    | 0.9    | -1.9   | 1.4    | 1.8    | 1.7    | 0.6    | 1.7    | 1.1    | 1.0    | 1.0    | 1.0    |
| P6                                                                                                                                                         | 2.6 <sup>a</sup>    | 4.7    | 3.2    | 5.2    | 4.7    | 4.8    | 1.9    | 3.8    | 3.6    | 3.7    | 4.4    | 3.7    | 4.1    | 4.2    | 4.2    | 4.2    |
| P7                                                                                                                                                         | 11.2 <sup>a</sup>   | 1.9    | 16.2   | 6.5    | 5.3    | 10.2   | 10.8   | 12.0   | 11.7   | 12.0   | 10.5   | 12.0   | 10.4   | 10.4   | 10.4   | 10.4   |
| P8                                                                                                                                                         | 22.9 <sup>a</sup>   | 29.3   | 30.3   | 30.6   | 21.5   | 22.9   | 23.1   | 22.1   | 22.4   | 22.6   | 23.5   | 22.6   | 23.5   | 24.2   | 24.2   | 24.2   |
| P9                                                                                                                                                         | 6.9 <sup>a</sup>    | 6.0    | 5.3    | 6.3    | 5.4    | 5.9    | 3.6    | 5.5    | 5.3    | 5.3    | 5.6    | 5.3    | 5.5    | 5.5    | 5.5    | 5.5    |
| P10                                                                                                                                                        | 3.6 <sup>a</sup>    | -10.1  | -4.3   | 2.2    | 4.5    | 3.0    | -5.0   | 7.0    | 8.2    | 7.8    | 4.1    | 7.8    | 5.6    | 5.3    | 5.2    | 5.2    |
| P11                                                                                                                                                        | 1.9 <sup>a</sup>    | -37.5  | -18.4  | -4.1   | 0.9    | -0.2   | -17.9  | 8.0    | 12.4   | 11.0   | 10.9   | 10.9   | 6.1    | 5.2    | 5.1    | 5.1    |
| P12                                                                                                                                                        | 47.0 <sup>a</sup>   | 50.6   | 54.5   | 46.0   | 44.3   | 48.1   | 47.4   | 44.2   | 43.2   | 43.7   | 44.1   | 43.7   | 43.5   | 43.4   | 43.4   | 43.4   |
| P13                                                                                                                                                        | 36.0 <sup>a</sup>   | 17.2   | 26.6   | 29.1   | 22.2   | 25.9   | 37.5   | 46.0   | 45.6   | 45.7   | 42.6   | 45.6   | 42.0   | 42.2   | 42.2   | 42.2   |
| P14                                                                                                                                                        | 24.2 <sup>a</sup>   | 42.1   | 31.7   | 31.6   | 25.2   | 20.7   | 11.4   | 22.2   | 22.2   | 22.2   | 12.6   | 22.2   | 12.6   | 12.5   | 12.5   | 12.5   |
| P15                                                                                                                                                        | 7.3 <sup>a</sup>    | 7.1    | 9.7    | 4.5    | 9.0    | 7.3    | 4.3    | 3.2    | 3.3    | 3.2    | 10.0   | 3.2    | 9.9    | 10.0   | 10.0   | 10.0   |
| P16                                                                                                                                                        | 10.8 <sup>a</sup>   | 8.2    | 15.6   | 18.0   | 9.6    | 17.1   | 14.7   | 22.7   | 22.6   | 22.8   | 20.3   | 22.8   | 20.3   | 20.3   | 20.3   | 20.3   |
| P17                                                                                                                                                        | 27.0 <sup>a</sup>   | 24.4   | 37.3   | 24.7   | 22.0   | 20.9   | 16.5   | 15.5   | 16.0   | 15.8   | 27.0   | 15.8   | 27.3   | 27.4   | 27.4   | 27.4   |
| P18                                                                                                                                                        | 11.2 <sup>a</sup>   | 10.3   | 8.9    | 12.2   | 4.9    | 8.3    | 14.5   | 12.2   | 12.2   | 12.4   | 6.7    | 12.4   | 6.6    | 6.9    | 6.9    | 6.9    |
| E20                                                                                                                                                        | 4.6 <sup>a</sup>    | 2.3    | -0.2   | 0.7    | 1.7    | 3.8    | 3.9    | 0.2    | 0.2    | 0.2    | -0.8   | 0.2    | -0.8   | -0.8   | -0.8   | -0.8   |
| P20                                                                                                                                                        | 20.2 <sup>a</sup>   | 7.3    | 12.5   | 16.0   | 7.3    | 9.1    | 7.5    | 7.4    | 7.3    | 7.4    | 9.1    | 7.4    | 9.1    | 9.0    | 9.0    | 9.0    |
| P21                                                                                                                                                        | 0.9 <sup>a</sup>    | 1.0    | -1.5   | 0.1    | -0.1   | -0.2   | 0.9    | -1.0   | -1.1   | -1.1   | -0.1   | -1.1   | -0.2   | -0.1   | -0.1   | -0.1   |
| E21                                                                                                                                                        | 3.2 <sup>a</sup>    | -2.1   | 6.7    | -0.3   | 2.8    | 0.7    | 1.0    | -2.3   | -2.1   | -2.1   | -1.6   | -2.1   | -1.5   | -1.4   | -1.4   | -1.4   |
| P23                                                                                                                                                        | 5.3 <sup>a</sup>    | 4.9    | 7.4    | 0.7    | 1.5    | 1.6    | 5.7    | 3.8    | 4.1    | 3.9    | 7.6    | 3.9    | 7.7    | 7.8    | 7.7    | 7.7    |
| P24                                                                                                                                                        | 12.5 <sup>a</sup>   | 11.8   | 11.2   | 10.2   | 12.2   | 12.7   | 14.4   | 10.7   | 10.9   | 10.8   | 14.1   | 10.8   | 14.0   | 14.2   | 14.2   | 14.2   |
| P25                                                                                                                                                        | 26.5 <sup>a</sup>   | 28.2   | 32.0   | 36.6   | 29.4   | 29.9   | 29.7   | 30.3   | 30.2   | 30.4   | 36.9   | 30.4   | 36.9   | 37.1   | 37.1   | 37.1   |

... continued on next page ...

Table S20: ... continued from previous page ...

| Species | Ref.              | MNDO | AMI  | PM3  | PM6  | PM7  | OM1  | OM2   |       | OM3   |       | OM3   | D3    | D3T   |
|---------|-------------------|------|------|------|------|------|------|-------|-------|-------|-------|-------|-------|-------|
|         |                   |      |      |      |      |      |      | D2    | D3    | D2    | D3    |       |       |       |
| P26     | 18.2 <sup>a</sup> | 16.7 | 12.6 | 14.7 | 15.9 | 17.3 | 18.8 | 21.6  | 21.7  | 21.7  | 24.3  | 24.3  | 24.3  | 24.3  |
| P27     | 64.2 <sup>a</sup> | 92.9 | 92.9 | 64.8 | 71.1 | 66.1 | 71.9 | 58.0  | 58.6  | 58.4  | 62.5  | 63.1  | 63.2  | 63.2  |
| P28     | 31.2 <sup>a</sup> | 12.4 | 22.4 | 26.5 | 26.0 | 30.2 | 31.1 | 41.4  | 41.2  | 41.4  | 44.4  | 44.3  | 44.4  | 44.4  |
| P29     | 11.9 <sup>a</sup> | 24.6 | 24.6 | 18.6 | 13.4 | 12.2 | 20.3 | 19.1  | 19.5  | 19.3  | 19.3  | 19.3  | 19.7  | 19.7  |
| P30     | 9.5 <sup>a</sup>  | 11.5 | 10.2 | 7.6  | 14.5 | 12.7 | 7.2  | 8.9   | 8.6   | 8.7   | 13.2  | 12.9  | 12.9  | 12.9  |
| P31     | 14.1 <sup>a</sup> | 23.7 | 20.7 | 20.2 | 15.0 | 11.8 | 16.3 | 16.8  | 17.4  | 17.4  | 16.7  | 17.3  | 17.6  | 17.6  |
| P32     | 7.1 <sup>a</sup>  | 10.2 | 10.9 | 0.7  | 0.4  | -4.4 | -1.4 | -11.5 | -10.7 | -11.2 | -15.8 | -15.7 | -15.3 | -15.3 |
| P33     | 5.6 <sup>a</sup>  | 24.9 | 19.7 | 13.6 | 6.4  | 7.6  | 17.0 | 1.1   | 0.3   | 0.5   | 7.7   | 6.8   | 6.9   | 7.0   |
| P34     | 7.3 <sup>a</sup>  | 2.6  | -1.8 | 5.1  | 5.0  | 6.5  | 1.2  | 5.2   | 5.4   | 5.3   | 5.1   | 5.3   | 5.3   | 5.3   |

a L.Goerigk and S.Grimme, J.Chem.Theory Comput. 6, 107 (2010) ; S.Grimme, M.Steinmetz, and M.Korth, J.Org.Chem. 72, 2118 (2007) ;  
M.P.Repasky, J.Chandrasekhar, and W.L.Jorgensen, J.Comput.Chem. 23, 1601 (2002) ;  
K.W.Sattelmeyer, J.Tirado-Rives, and W.L.Jorgensen, J.Phys.Chem.A 110, 13551 (2006).

---

ISOL22

|      |                   |       |      |      |      |      |      |      |      |      |      |      |      |      |
|------|-------------------|-------|------|------|------|------|------|------|------|------|------|------|------|------|
| i2p  | 40.6 <sup>a</sup> | 6.0   | 28.5 | 26.1 | 32.0 | 29.2 | 26.5 | 32.6 | 40.3 | 38.2 | 30.5 | 37.3 | 38.1 | 37.9 |
| i3p  | 11.7 <sup>a</sup> | 25.8  | 11.1 | 4.0  | 14.3 | 7.0  | 9.2  | 10.2 | 10.2 | 10.0 | 1.9  | 1.6  | 1.7  | 1.7  |
| i5p  | 34.9 <sup>a</sup> | 43.3  | 40.2 | 39.3 | 39.6 | 34.7 | 37.5 | 33.1 | 36.3 | 34.7 | 37.2 | 38.9 | 39.8 | 39.7 |
| i6p  | 25.9 <sup>a</sup> | 1.5   | -1.4 | 14.6 | 23.5 | 12.7 | 4.7  | 8.7  | 9.3  | 8.5  | -1.9 | -1.2 | -1.9 | -1.8 |
| i7p  | 18.8 <sup>a</sup> | 0.8   | 10.7 | 14.8 | 14.5 | 12.9 | 11.5 | 17.5 | 21.8 | 20.5 | 16.0 | 20.0 | 20.0 | 19.9 |
| i8p  | 18.3 <sup>a</sup> | -12.5 | 24.5 | 14.8 | 4.5  | 17.9 | 13.6 | 26.9 | 19.8 | 21.8 | 19.9 | 12.9 | 13.5 | 14.0 |
| i9p  | 22.3 <sup>a</sup> | 8.6   | 16.9 | 18.3 | 21.0 | 19.1 | 11.0 | 22.3 | 24.6 | 23.6 | 19.3 | 21.2 | 21.2 | 21.1 |
| i10p | 7.9 <sup>a</sup>  | 4.9   | 10.2 | 10.8 | 1.7  | 3.2  | 1.8  | 5.6  | 6.8  | 6.4  | 6.2  | 7.2  | 7.5  | 7.5  |
| i11p | 38.1 <sup>a</sup> | 49.0  | 70.2 | 57.6 | 62.4 | 58.2 | 64.0 | 64.6 | 64.8 | 64.8 | 67.6 | 68.0 | 67.8 | 67.8 |
| i12p | 1.0 <sup>a</sup>  | -1.7  | 2.1  | -1.4 | -2.1 | -2.7 | -1.3 | 2.5  | 2.3  | 2.5  | 3.2  | 3.0  | 3.1  | 3.1  |
| i13p | 35.1 <sup>a</sup> | 33.0  | 44.2 | 36.5 | 30.9 | 33.6 | 15.4 | 27.6 | 28.4 | 28.0 | 37.8 | 38.5 | 38.4 | 38.4 |
| i14p | 5.2 <sup>a</sup>  | -12.8 | 3.2  | 4.9  | 6.1  | 8.4  | -0.6 | 7.6  | 8.6  | 8.4  | 9.2  | 9.9  | 10.4 | 10.3 |
| i15p | 3.9 <sup>a</sup>  | 69.4  | 29.5 | 45.8 | 29.0 | 22.3 | 11.0 | 9.4  | 10.6 | 10.4 | 9.5  | 11.0 | 11.1 | 11.0 |
| i16p | 22.6 <sup>a</sup> | 17.5  | 28.5 | 19.7 | 21.2 | 21.4 | 21.0 | 17.9 | 17.5 | 17.6 | 19.7 | 18.9 | 19.4 | 19.6 |
| i17p | 11.1 <sup>a</sup> | 0.9   | -3.5 | 6.4  | 6.4  | 0.8  | 7.9  | 10.3 | 12.4 | 11.1 | 10.2 | 11.7 | 11.3 | 11.2 |
| i18p | 26.1 <sup>a</sup> | 4.5   | 15.1 | 10.6 | 9.9  | 10.6 | 26.6 | 29.9 | 32.5 | 31.5 | 28.0 | 30.4 | 30.1 | 30.1 |
| i20p | 4.5 <sup>a</sup>  | 10.4  | 10.2 | 10.6 | 5.3  | 4.6  | -1.0 | 3.2  | 2.8  | 2.7  | 4.7  | 4.3  | 4.3  | 4.3  |
| i22p | 0.5 <sup>a</sup>  | -12.4 | -9.7 | 2.3  | -8.5 | 0.0  | -2.1 | -0.4 | 4.1  | 3.0  | 0.4  | 4.8  | 4.8  | 4.5  |

a L.Goerigk and S.Grimme, J.Chem.Theory Comput. 7, 291 (2011) ;  
R.Huenerbein, B.Schirmer, J.Moellmann, and S.Grimme, Phys.Chem.Chem.Phys. 12, 6940 (2010).

---

DC9

|             |                    |        |        |        |        |        |        |        |        |        |        |        |        |        |
|-------------|--------------------|--------|--------|--------|--------|--------|--------|--------|--------|--------|--------|--------|--------|--------|
| ISO_E36     | -1.0 <sup>a</sup>  | -8.3   | -0.0   | -3.0   | 7.9    | 3.6    | -5.3   | -1.7   | -1.5   | -1.6   | 1.0    | 1.3    | 1.2    | 1.2    |
| c20bowl     | -13.3 <sup>a</sup> | -155.5 | -169.5 | -115.4 | -104.0 | -115.0 | -129.5 | -106.9 | -100.2 | -104.2 | -106.9 | -100.6 | -102.3 | -102.2 |
| heptatriyne | -14.3 <sup>a</sup> | -20.6  | -18.3  | -26.7  | -13.8  | -11.5  | -15.4  | -14.3  | -14.4  | -14.2  | -14.1  | -14.2  | -14.1  | -14.1  |
| omcb        | -19.2 <sup>a</sup> | 30.6   | 5.3    | -2.3   | -8.3   | -3.5   | -2.7   | -14.9  | -26.0  | -22.7  | -7.5   | -19.3  | -18.0  | -17.6  |
| ISO_E35     | -19.5 <sup>a</sup> | -13.2  | -4.5   | -18.9  | -15.7  | -3.5   | -20.8  | -34.2  | -38.2  | -35.4  | -32.4  | -34.0  | -34.2  | -34.2  |
| carboxol    | -26.9 <sup>a</sup> | -78.7  | -71.5  | -64.0  | -24.9  | -38.4  | -67.5  | -80.1  | -80.1  | -80.6  | -66.8  | -67.4  | -67.3  | -67.3  |
| 13dip       | -38.1 <sup>a</sup> | -64.5  | -43.1  | -48.9  | -43.0  | -39.4  | -42.6  | -46.7  | -48.7  | -48.4  | -50.5  | -52.0  | -53.2  | -53.2  |

a L.Goerigk and S.Grimme, J.Chem.Theory Comput. 6, 107 (2010).

---

DARC

|    |                    |       |       |       |       |       |       |       |       |       |       |       |       |       |
|----|--------------------|-------|-------|-------|-------|-------|-------|-------|-------|-------|-------|-------|-------|-------|
| P1 | -43.8 <sup>a</sup> | -52.0 | -54.5 | -52.4 | -48.2 | -44.7 | -43.3 | -40.0 | -43.5 | -42.6 | -43.5 | -46.0 | -47.3 | -47.3 |
|----|--------------------|-------|-------|-------|-------|-------|-------|-------|-------|-------|-------|-------|-------|-------|

... continued on next page ...

Table S20: ... continued from previous page ...

| Species | Ref.               | MNDO  | AMI   | PM3   | PM6   | PM7   | OM1   | OM2   |       | OM3   |       | D3T   | D3T   |
|---------|--------------------|-------|-------|-------|-------|-------|-------|-------|-------|-------|-------|-------|-------|
|         |                    |       |       |       |       |       |       | D2    | D3    | D2    | D3    |       |       |
| P2      | -59.3 <sup>a</sup> | -71.9 | -66.0 | -62.0 | -66.8 | -65.0 | -58.8 | -57.1 | -59.5 | -59.2 | -60.2 | -61.5 | -63.4 |
| P3      | -30.0 <sup>a</sup> | -19.6 | -26.4 | -25.4 | -24.4 | -21.4 | -21.5 | -26.3 | -30.5 | -29.2 | -25.9 | -29.2 | -30.1 |
| P4      | -33.1 <sup>a</sup> | -25.1 | -22.1 | -22.1 | -30.7 | -29.0 | -27.3 | -36.0 | -39.0 | -38.4 | -35.3 | -37.3 | -38.9 |
| P5      | -36.5 <sup>a</sup> | -26.8 | -36.7 | -35.5 | -33.7 | -31.2 | -31.1 | -34.6 | -39.3 | -37.9 | -34.8 | -38.5 | -39.5 |
| P6      | -48.2 <sup>a</sup> | -37.5 | -40.4 | -38.6 | -46.1 | -46.4 | -43.6 | -51.3 | -54.8 | -54.1 | -50.3 | -52.7 | -54.5 |
| P7      | -14.4 <sup>a</sup> | -2.9  | -19.7 | -13.2 | -22.5 | -19.7 | -19.0 | -31.6 | -36.9 | -35.6 | -26.7 | -30.9 | -32.3 |
| P7X     | -16.2 <sup>a</sup> | -4.2  | -21.5 | -15.3 | -22.5 | -20.9 | -20.4 | -32.5 | -37.4 | -36.2 | -27.6 | -31.6 | -32.8 |
| P8      | -17.2 <sup>a</sup> | -3.3  | -20.9 | -13.5 | -23.6 | -21.5 | -20.2 | -32.0 | -37.4 | -36.1 | -28.6 | -33.0 | -34.4 |
| P8X     | -19.2 <sup>a</sup> | -4.2  | -23.1 | -15.6 | -24.0 | -23.1 | -22.0 | -33.4 | -38.5 | -37.2 | -30.1 | -34.3 | -35.5 |
| P9      | -31.6 <sup>a</sup> | -15.6 | -30.2 | -25.5 | -32.3 | -28.0 | -28.1 | -37.9 | -43.9 | -42.3 | -34.6 | -39.6 | -40.7 |
| P9X     | -32.1 <sup>a</sup> | -14.9 | -32.0 | -27.1 | -33.2 | -29.1 | -28.6 | -38.9 | -44.7 | -43.1 | -35.6 | -40.5 | -41.5 |
| P10     | -34.1 <sup>a</sup> | -15.6 | -30.7 | -25.3 | -32.6 | -29.4 | -28.7 | -37.9 | -44.0 | -42.4 | -36.2 | -41.4 | -42.5 |
| P10X    | -34.4 <sup>a</sup> | -14.8 | -32.4 | -26.7 | -33.6 | -30.6 | -29.3 | -38.9 | -44.9 | -43.3 | -37.2 | -42.4 | -43.3 |

a L. Goerigk and S. Grimme, J.Chem.Theory Comput. 6, 107 (2010) ;  
 E.R.Johnson, P.Mori-Sánchez, A.J.Cohen, and W.J.Yang, J.Chem.Phys. 129, 204112 (2008).  
 BSR36

|      |                   |       |       |       |      |      |       |      |      |      |      |      |      |      |
|------|-------------------|-------|-------|-------|------|------|-------|------|------|------|------|------|------|------|
| c2h6 | 9.8 <sup>a</sup>  | -25.0 | -11.7 | 0.4   | 5.8  | 4.0  | -9.5  | 13.4 | 16.9 | 15.9 | 9.0  | 13.2 | 12.5 | 12.4 |
| c2h6 | 9.7 <sup>a</sup>  | -18.4 | -8.1  | 1.4   | 6.1  | 4.6  | -6.1  | 12.6 | 15.2 | 14.6 | 9.4  | 12.5 | 12.0 | 12.0 |
| c2h6 | 11.4 <sup>a</sup> | -27.6 | -12.2 | 1.6   | 7.7  | 5.6  | -10.9 | 16.2 | 19.9 | 18.9 | 10.7 | 15.1 | 14.4 | 14.3 |
| c2h6 | 9.0 <sup>a</sup>  | -20.6 | -9.4  | 0.3   | 5.0  | 3.7  | -7.4  | 11.6 | 14.5 | 13.8 | 8.2  | 11.7 | 11.1 | 11.1 |
| c2h6 | 8.7 <sup>a</sup>  | -12.7 | -5.8  | 1.5   | 5.5  | 4.2  | -3.5  | 11.0 | 12.9 | 12.5 | 8.9  | 11.1 | 10.8 | 10.8 |
| c2h6 | 10.9 <sup>a</sup> | -15.9 | -7.3  | 1.9   | 6.8  | 5.3  | -4.4  | 13.7 | 16.1 | 15.6 | 11.1 | 14.0 | 13.5 | 13.5 |
| c2h6 | 13.1 <sup>a</sup> | -27.9 | -12.2 | 1.4   | 8.1  | 6.1  | -9.8  | 16.9 | 20.9 | 19.9 | 11.9 | 16.6 | 15.9 | 15.8 |
| c2h6 | 11.9 <sup>a</sup> | -21.6 | -9.7  | 1.7   | 7.4  | 5.7  | -7.0  | 15.4 | 18.5 | 17.8 | 11.6 | 15.4 | 14.8 | 14.7 |
| c2h6 | 13.5 <sup>a</sup> | -31.2 | -13.7 | 1.9   | 9.1  | 6.9  | -11.8 | 19.1 | 23.3 | 22.2 | 13.0 | 18.1 | 17.3 | 17.2 |
| c2h6 | 11.4 <sup>a</sup> | -30.6 | -14.3 | -0.2  | 6.3  | 4.6  | -11.4 | 15.4 | 19.8 | 18.7 | 10.4 | 15.6 | 14.7 | 14.7 |
| c2h6 | 13.0 <sup>a</sup> | -40.4 | -18.2 | -0.1  | 8.0  | 5.7  | -16.2 | 19.5 | 24.9 | 23.4 | 12.1 | 18.4 | 17.4 | 17.3 |
| c2h6 | 12.8 <sup>a</sup> | -36.2 | -16.1 | 0.0   | 7.2  | 5.5  | -14.0 | 17.3 | 22.4 | 21.1 | 10.8 | 16.8 | 15.8 | 15.7 |
| c2h6 | 11.2 <sup>a</sup> | -23.9 | -10.9 | 0.7   | 6.4  | 4.9  | -8.3  | 14.5 | 17.9 | 17.1 | 10.6 | 14.7 | 14.0 | 14.0 |
| c2h6 | 10.2 <sup>a</sup> | -26.2 | -11.8 | 0.4   | 6.1  | 4.9  | -9.7  | 13.9 | 17.6 | 16.8 | 9.9  | 14.3 | 13.6 | 13.6 |
| c2h6 | 15.1 <sup>a</sup> | -59.0 | -25.7 | -1.9  | 8.6  | 6.3  | -23.9 | 24.7 | 32.3 | 30.2 | 13.9 | 22.7 | 21.3 | 21.1 |
| c2h6 | 2.4 <sup>a</sup>  | -14.0 | -15.0 | -3.1  | 0.4  | -0.5 | -6.6  | 11.2 | 11.8 | 11.5 | 7.4  | 8.1  | 7.8  | 7.8  |
| c2h6 | 10.7 <sup>a</sup> | -15.4 | -10.9 | 1.0   | 5.8  | 4.2  | -4.5  | 16.9 | 18.9 | 18.3 | 13.0 | 15.0 | 14.8 | 14.7 |
| c2h6 | 6.3 <sup>a</sup>  | -19.1 | -17.8 | -1.9  | 3.6  | 2.0  | -8.5  | 16.4 | 17.8 | 17.4 | 11.5 | 13.2 | 12.8 | 12.8 |
| c2h6 | 14.9 <sup>a</sup> | -22.1 | -13.9 | 1.9   | 8.6  | 6.6  | -6.9  | 22.3 | 25.3 | 24.4 | 17.0 | 20.2 | 19.7 | 19.7 |
| c2h6 | 10.7 <sup>a</sup> | -31.4 | -22.9 | -0.8  | 7.0  | 4.8  | -13.6 | 23.3 | 26.5 | 25.6 | 15.6 | 19.3 | 18.6 | 18.6 |
| c2h6 | 10.1 <sup>a</sup> | -24.3 | -20.7 | -0.8  | 6.6  | 4.3  | -10.5 | 21.7 | 24.1 | 23.5 | 15.8 | 18.4 | 18.0 | 18.0 |
| c2h6 | 9.1 <sup>a</sup>  | -29.4 | -22.9 | -2.6  | 4.7  | 2.9  | -12.4 | 20.0 | 23.1 | 22.3 | 13.4 | 16.9 | 16.3 | 16.2 |
| c2h6 | 10.5 <sup>a</sup> | -25.8 | -21.1 | -1.0  | 6.2  | 4.2  | -10.9 | 21.5 | 24.1 | 23.5 | 15.3 | 18.3 | 17.8 | 17.8 |
| c2h6 | 9.8 <sup>a</sup>  | -24.4 | -20.6 | -0.7  | 6.7  | 4.3  | -10.4 | 22.0 | 24.4 | 23.8 | 16.0 | 18.7 | 18.3 | 18.3 |
| c2h6 | 19.3 <sup>a</sup> | -46.7 | -34.3 | -1.6  | 10.2 | 8.1  | -18.3 | 37.0 | 42.6 | 41.0 | 25.6 | 31.8 | 30.9 | 30.7 |
| c2h6 | 9.7 <sup>a</sup>  | -52.1 | -43.3 | -15.0 | -0.3 | -5.6 | -30.5 | 15.0 | 21.8 | 19.7 | 8.2  | 15.7 | 14.4 | 14.2 |
| c2h6 | 15.2 <sup>a</sup> | -42.6 | -35.7 | -5.5  | 6.9  | 3.5  | -19.4 | 29.7 | 34.7 | 33.4 | 21.4 | 27.0 | 26.1 | 25.9 |
| c2h6 | 26.1 <sup>a</sup> | -38.1 | -25.4 | 2.5   | 14.2 | 11.8 | -12.0 | 39.4 | 44.7 | 43.2 | 29.9 | 35.5 | 34.9 | 34.8 |
| c2h6 | 23.4 <sup>a</sup> | -41.2 | -27.9 | 0.8   | 12.7 | 10.2 | -14.2 | 36.8 | 42.8 | 41.0 | 27.0 | 33.4 | 32.6 | 32.4 |

... continued on next page ...



Table S20: ... continued from previous page ...

| Species                                                                                                               | Ref.              | MNDO  | AMI   | PM3   | PM6  | PM7   | OM1   |      |      | OM2  |      |      | OM3  |      |      | D3T |
|-----------------------------------------------------------------------------------------------------------------------|-------------------|-------|-------|-------|------|-------|-------|------|------|------|------|------|------|------|------|-----|
|                                                                                                                       |                   |       |       |       |      |       | D2    | D3   | D3T  | D2   | D3   | D3T  | D2   | D3   | D3T  |     |
| c2h6                                                                                                                  | 28.0 <sup>a</sup> | -50.7 | -31.3 | 0.9   | 14.5 | 11.9  | -16.8 | 42.4 | 49.7 | 47.8 | 47.6 | 31.4 | 39.3 | 38.3 | 38.2 |     |
| c2h6                                                                                                                  | 25.4 <sup>a</sup> | -40.5 | -22.6 | 2.6   | 14.3 | 11.6  | -12.4 | 35.3 | 41.2 | 39.8 | 39.7 | 27.2 | 33.9 | 33.0 | 32.9 |     |
| c2h6                                                                                                                  | 27.6 <sup>a</sup> | -46.1 | -36.7 | 1.5   | 14.4 | 11.6  | -15.9 | 50.6 | 56.2 | 54.1 | 54.0 | 36.8 | 41.9 | 41.5 | 41.4 |     |
| c2h6                                                                                                                  | 39.6 <sup>a</sup> | -66.2 | -45.3 | 4.6   | 23.0 | 19.2  | -24.2 | 66.2 | 74.9 | 72.2 | 71.9 | 47.4 | 56.1 | 55.3 | 55.0 |     |
| c2h6                                                                                                                  | 32.4 <sup>a</sup> | -75.5 | -50.7 | -1.7  | 16.6 | 13.7  | -29.0 | 59.1 | 68.7 | 65.6 | 65.3 | 40.5 | 50.1 | 49.0 | 48.8 |     |
| c2h6                                                                                                                  | 51.4 <sup>a</sup> | -86.2 | -54.1 | 7.5   | 31.3 | 26.7  | -32.6 | 81.5 | 93.3 | 90.0 | 89.7 | 57.9 | 70.3 | 69.0 | 68.6 |     |
| c2h6                                                                                                                  | 47.1 <sup>a</sup> | -74.9 | -62.3 | 1.9   | 23.8 | 20.9  | -26.0 | 85.3 | 95.0 | 91.5 | 91.2 | 62.2 | 70.7 | 70.2 | 69.9 |     |
| a. L.Goerigk and S.Grimme, J.Chem.Theory Comput., 7, 291 (2011) ; H.Krieg, and S.Grimme, Mol.Phys., 108, 2655 (2010). |                   |       |       |       |      |       |       |      |      |      |      |      |      |      |      |     |
| BSR36 (ZPVE-exclusive, 0 K)                                                                                           |                   |       |       |       |      |       |       |      |      |      |      |      |      |      |      |     |
| c2h6                                                                                                                  | 9.8 <sup>a</sup>  | -26.5 | -13.3 | 0.3   | 2.8  | 0.6   | -11.1 | 12.1 | 15.7 | 14.8 | 14.7 | 7.8  | 12.2 | 11.3 | 11.2 |     |
| c2h6                                                                                                                  | 9.7 <sup>a</sup>  | -19.7 | -9.6  | 1.2   | 3.7  | 1.8   | -7.5  | 11.6 | 14.2 | 13.6 | 13.5 | 8.4  | 11.6 | 11.0 | 11.0 |     |
| c2h6                                                                                                                  | 11.4 <sup>a</sup> | -29.3 | -14.1 | 1.6   | 4.4  | 1.7   | -12.7 | 14.9 | 18.7 | 17.7 | 17.6 | 9.3  | 14.0 | 13.0 | 13.0 |     |
| c2h6                                                                                                                  | 9.0 <sup>a</sup>  | -21.9 | -10.9 | 0.0   | 2.4  | 0.8   | -8.8  | 10.6 | 13.5 | 12.7 | 12.7 | 7.2  | 10.8 | 10.1 | 10.0 |     |
| c2h6                                                                                                                  | 8.7 <sup>a</sup>  | -13.8 | -7.1  | 1.2   | 3.6  | 1.9   | -4.7  | 10.1 | 12.0 | 11.6 | 11.6 | 8.0  | 10.4 | 10.0 | 10.0 |     |
| c2h6                                                                                                                  | 10.9 <sup>a</sup> | -17.3 | -8.9  | 1.4   | 4.3  | 2.4   | -5.9  | 12.6 | 15.0 | 14.5 | 14.5 | 10.1 | 13.0 | 12.5 | 12.5 |     |
| c2h6                                                                                                                  | 13.1 <sup>a</sup> | -29.7 | -14.1 | 1.3   | 4.6  | 2.2   | -11.7 | 15.4 | 19.5 | 18.5 | 18.4 | 10.4 | 15.5 | 14.4 | 14.4 |     |
| c2h6                                                                                                                  | 11.9 <sup>a</sup> | -23.2 | -11.4 | 1.4   | 4.5  | 2.3   | -8.7  | 14.1 | 17.3 | 16.5 | 16.5 | 10.4 | 14.3 | 13.5 | 13.5 |     |
| c2h6                                                                                                                  | 13.5 <sup>a</sup> | -33.1 | -15.9 | 2.0   | 5.2  | 2.4   | -13.9 | 17.5 | 21.9 | 20.7 | 20.7 | 11.4 | 16.8 | 15.7 | 15.6 |     |
| c2h6                                                                                                                  | 11.4 <sup>a</sup> | -32.4 | -16.2 | -0.5  | 2.8  | 0.6   | -13.3 | 13.9 | 18.4 | 17.2 | 17.2 | 8.9  | 14.4 | 13.3 | 13.3 |     |
| c2h6                                                                                                                  | 13.0 <sup>a</sup> | -42.6 | -21.1 | 0.2   | 3.6  | 0.7   | -19.0 | 17.9 | 23.3 | 21.8 | 21.7 | 10.3 | 17.0 | 15.6 | 15.5 |     |
| c2h6                                                                                                                  | 12.8 <sup>a</sup> | -38.1 | -18.2 | 0.1   | 3.3  | 1.0   | -16.0 | 15.8 | 21.0 | 19.6 | 19.5 | 9.2  | 15.5 | 14.2 | 14.1 |     |
| c2h6                                                                                                                  | 11.2 <sup>a</sup> | -25.5 | -12.6 | 0.4   | 3.4  | 1.5   | -10.0 | 13.2 | 16.7 | 15.8 | 15.8 | 9.3  | 13.6 | 12.8 | 12.7 |     |
| c2h6                                                                                                                  | 10.2 <sup>a</sup> | -27.8 | -13.5 | 0.1   | 3.0  | 1.5   | -11.4 | 12.6 | 16.4 | 15.5 | 15.4 | 8.6  | 13.3 | 12.4 | 12.3 |     |
| c2h6                                                                                                                  | 15.1 <sup>a</sup> | -61.8 | -28.4 | -1.0  | 2.7  | -0.4  | -26.7 | 22.7 | 30.4 | 28.2 | 28.0 | 11.5 | 20.8 | 19.0 | 18.8 |     |
| c2h6                                                                                                                  | 2.4 <sup>a</sup>  | -16.9 | -18.4 | -5.4  | -3.8 | -5.0  | -10.2 | 8.0  | 8.6  | 8.4  | 8.3  | 4.2  | 5.0  | 4.7  | 4.7  |     |
| c2h6                                                                                                                  | 10.7 <sup>a</sup> | -18.4 | -14.1 | -0.7  | 1.4  | -0.6  | -7.7  | 14.4 | 16.4 | 15.7 | 15.7 | 10.5 | 12.6 | 12.3 | 12.3 |     |
| c2h6                                                                                                                  | 6.3 <sup>a</sup>  | -22.5 | -21.2 | -3.6  | -1.5 | -3.6  | -12.1 | 12.8 | 14.3 | 13.9 | 13.9 | 7.9  | 9.7  | 9.3  | 9.2  |     |
| c2h6                                                                                                                  | 14.9 <sup>a</sup> | -25.7 | -17.6 | 0.2   | 3.4  | 0.8   | -10.6 | 19.4 | 22.4 | 21.5 | 21.4 | 14.1 | 17.4 | 16.9 | 16.8 |     |
| c2h6                                                                                                                  | 10.7 <sup>a</sup> | -35.5 | -27.6 | -2.9  | 0.6  | -2.3  | -17.9 | 19.3 | 22.6 | 21.6 | 21.5 | 11.5 | 15.4 | 14.6 | 14.5 |     |
| c2h6                                                                                                                  | 10.1 <sup>a</sup> | -28.2 | -24.7 | -2.6  | 0.6  | -2.4  | -14.7 | 18.5 | 20.2 | 19.6 | 19.6 | 12.5 | 14.7 | 14.1 | 14.1 |     |
| c2h6                                                                                                                  | 9.1 <sup>a</sup>  | -33.3 | -26.8 | -4.4  | -1.3 | -3.8  | -16.5 | 16.7 | 19.9 | 19.0 | 18.9 | 10.1 | 13.7 | 13.0 | 13.0 |     |
| c2h6                                                                                                                  | 10.5 <sup>a</sup> | -29.7 | -25.1 | -2.8  | 0.2  | -2.4  | -15.0 | 17.6 | 20.3 | 19.6 | 19.5 | 12.0 | 14.6 | 14.6 | 14.5 |     |
| c2h6                                                                                                                  | 9.8 <sup>a</sup>  | -28.3 | -24.6 | -2.4  | 0.6  | -2.4  | -14.6 | 18.8 | 21.2 | 20.6 | 20.5 | 12.8 | 15.6 | 15.0 | 15.0 |     |
| c2h6                                                                                                                  | 19.3 <sup>a</sup> | -53.7 | -41.4 | -4.8  | -0.1 | -3.3  | -25.4 | 31.3 | 37.0 | 35.4 | 35.2 | 19.9 | 26.3 | 25.2 | 25.1 |     |
| c2h6                                                                                                                  | 9.7 <sup>a</sup>  | -58.5 | -50.0 | -19.5 | -9.7 | -15.8 | -37.1 | 9.3  | 16.4 | 14.3 | 14.1 | 2.8  | 10.7 | 9.0  | 8.8  |     |
| c2h6                                                                                                                  | 15.2 <sup>a</sup> | -49.2 | -42.5 | -9.3  | -2.9 | -7.2  | -26.3 | 24.1 | 29.2 | 27.8 | 27.7 | 15.8 | 21.7 | 20.5 | 20.4 |     |
| c2h6                                                                                                                  | 26.1 <sup>a</sup> | -44.8 | -32.3 | -0.9  | 4.7  | 1.1   | -18.9 | 34.0 | 39.3 | 37.8 | 37.7 | 24.6 | 30.4 | 29.6 | 29.5 |     |
| c2h6                                                                                                                  | 23.4 <sup>a</sup> | -47.8 | -34.8 | -2.8  | 3.1  | -0.4  | -21.0 | 31.4 | 37.5 | 35.7 | 35.5 | 21.7 | 28.4 | 27.3 | 27.1 |     |
| c2h6                                                                                                                  | 28.0 <sup>a</sup> | -57.9 | -38.8 | -2.7  | 3.8  | 0.1   | -24.2 | 36.6 | 43.9 | 42.0 | 41.8 | 25.7 | 33.9 | 32.6 | 32.5 |     |
| c2h6                                                                                                                  | 25.4 <sup>a</sup> | -45.4 | -27.9 | 0.5   | 6.6  | 2.9   | -17.7 | 31.2 | 37.2 | 35.7 | 35.7 | 23.3 | 30.2 | 29.1 | 29.0 |     |
| c2h6                                                                                                                  | 27.6 <sup>a</sup> | -55.4 | -46.0 | -2.9  | 1.5  | -2.8  | -25.5 | 43.1 | 48.8 | 46.7 | 46.5 | 29.4 | 34.6 | 34.1 | 34.0 |     |
| c2h6                                                                                                                  | 39.6 <sup>a</sup> | -76.9 | -56.3 | 0.4   | 7.3  | 1.6   | -35.3 | 57.8 | 66.6 | 63.8 | 63.5 | 38.9 | 47.8 | 46.7 | 46.5 |     |
| c2h6                                                                                                                  | 32.4 <sup>a</sup> | -86.0 | -61.1 | -6.7  | 1.1  | -3.6  | -39.8 | 50.9 | 60.5 | 57.4 | 57.1 | 32.0 | 42.1 | 40.6 | 40.4 |     |
| c2h6                                                                                                                  | 51.4 <sup>a</sup> | -98.5 | -66.8 | 3.5   | 13.0 | 6.0   | -45.2 | 72.2 | 84.1 | 80.6 | 80.3 | 48.2 | 61.1 | 59.3 | 59.0 |     |

... continued on next page ...

Table S20: ... continued from previous page ...

| Species                                                                                                                      | Ref.               | MNDO   | AM1   | PM3   | PM6   | PM7   | OM1   |       | OM2   |       | OM3   |       | D3T   | D3T   |
|------------------------------------------------------------------------------------------------------------------------------|--------------------|--------|-------|-------|-------|-------|-------|-------|-------|-------|-------|-------|-------|-------|
|                                                                                                                              |                    |        |       |       |       |       | D2    | D3    | D2    | D3    | D2    | D3    |       |       |
| c2h6                                                                                                                         | 47.1 <sup>a</sup>  | -90.7  | -78.0 | -5.5  | 2.2   | -3.2  | -42.1 | 72.9  | 82.6  | 79.1  | 49.8  | 58.5  | 57.9  | 57.6  |
| a L.Goerigk and S.Grimme, J.Chem.Theory Comput. 7, 291 (2011) ; H.Krieg, and S.Grimme, Mol.Phys. 108, 2655 (2010).           |                    |        |       |       |       |       |       |       |       |       |       |       |       |       |
| antidimer                                                                                                                    | -9.0 <sup>a</sup>  | 11.3   | -1.9  | -6.3  | -17.2 | -23.8 | -12.4 | -18.3 | -30.5 | -29.5 | -17.9 | -29.7 | -32.1 | -31.5 |
| pxylene                                                                                                                      | -58.5 <sup>a</sup> | -69.0  | -43.6 | -28.9 | 6.8   | 20.7  | -55.0 | -52.1 | -44.4 | -45.0 | -54.8 | -47.1 | -45.5 | -45.8 |
| octane1                                                                                                                      | -1.9 <sup>a</sup>  | 39.7   | 16.7  | 4.0   | -0.5  | 0.1   | 18.6  | -8.1  | -12.8 | -11.3 | -0.5  | -5.8  | -4.9  | -4.8  |
| undecan1                                                                                                                     | 8.2 <sup>a</sup>   | 83.3   | 39.0  | 18.5  | 10.0  | 10.0  | 42.1  | -0.5  | -9.5  | -6.8  | 11.8  | 1.5   | 3.0   | 3.4   |
| F14f                                                                                                                         | -3.1 <sup>a</sup>  | -12.6  | -5.0  | -3.5  | -3.5  | -1.5  | -6.6  | -6.4  | -4.0  | -4.0  | -7.0  | -4.0  | -4.1  | -4.3  |
| F22f                                                                                                                         | 0.4 <sup>a</sup>   | -50.0  | -7.4  | -2.3  | -5.2  | 2.1   | -16.9 | -9.8  | 0.3   | -0.1  | -15.2 | -1.8  | -2.9  | -3.5  |
| a L.Goerigk and S.Grimme, J.Chem.Theory Comput. 7, 291 (2011) ; T.Schwabe and S.Grimme, Phys.Chem.Chem.Phys. 9, 3397 (2007). |                    |        |       |       |       |       |       |       |       |       |       |       |       |       |
| IDIS                                                                                                                         |                    |        |       |       |       |       |       |       |       |       |       |       |       |       |
| H2O2                                                                                                                         | 5.0 <sup>a</sup>   | -6.8   | 2.9   | 2.7   | 3.9   | 4.9   | 2.6   | 4.0   | 4.4   | 4.4   | 4.5   | 4.9   | 5.0   | 5.0   |
| H2O3                                                                                                                         | 15.8 <sup>a</sup>  | -27.3  | 7.5   | 7.8   | 11.7  | 14.3  | 5.7   | 12.0  | 13.4  | 13.2  | 13.1  | 14.7  | 14.8  | 14.8  |
| H2O4                                                                                                                         | 27.4 <sup>a</sup>  | -44.6  | 5.8   | 17.8  | 20.6  | 29.1  | 10.5  | 22.9  | 24.9  | 24.8  | 26.6  | 29.0  | 29.3  | 29.3  |
| H2O5                                                                                                                         | 35.9 <sup>a</sup>  | -56.9  | 4.5   | 22.6  | 26.4  | 40.5  | 14.4  | 30.6  | 33.0  | 33.0  | 36.2  | 39.1  | 39.6  | 39.5  |
| H2O6                                                                                                                         | 46.0 <sup>a</sup>  | -75.9  | 21.2  | 21.9  | 34.8  | 47.0  | 20.2  | 36.9  | 41.4  | 41.4  | 41.1  | 46.5  | 47.2  | 47.1  |
| H2O6c                                                                                                                        | 45.8 <sup>a</sup>  | -77.3  | 16.1  | 24.6  | 33.8  | 46.3  | 17.3  | 36.1  | 40.3  | 40.4  | 40.7  | 45.9  | 46.6  | 46.5  |
| H2O6b                                                                                                                        | 45.3 <sup>a</sup>  | -74.1  | 10.2  | 26.9  | 33.4  | 48.5  | 17.6  | 37.3  | 40.8  | 40.8  | 43.2  | 47.4  | 48.1  | 48.1  |
| H2O6c2                                                                                                                       | 44.3 <sup>a</sup>  | -67.9  | 5.0   | 27.6  | 32.7  | 51.9  | 19.5  | 38.8  | 41.7  | 41.7  | 46.2  | 49.5  | 50.1  | 50.1  |
| H2O842d                                                                                                                      | 72.6 <sup>a</sup>  | -120.6 | 22.7  | 39.5  | 53.8  | 75.1  | 27.4  | 58.0  | 64.5  | 65.0  | 66.1  | 74.1  | 75.5  | 75.3  |
| H2O8s4                                                                                                                       | 72.6 <sup>a</sup>  | -121.0 | 22.4  | 39.0  | 53.7  | 75.4  | 27.4  | 58.0  | 64.6  | 65.0  | 66.1  | 74.0  | 75.4  | 75.2  |
| H2O20                                                                                                                        | 200.1 <sup>a</sup> | -322.0 | 33.4  | 106.9 | 143.6 | 224.8 | 73.5  | 160.1 | 175.9 | 177.9 | 188.8 | 207.9 | 212.1 | 211.6 |
| H2O20fc                                                                                                                      | 212.6 <sup>a</sup> | -341.8 | 82.2  | 110.8 | 149.8 | 211.9 | 81.6  | 164.1 | 184.9 | 187.0 | 186.3 | 207.2 | 212.0 | 211.3 |
| H2O20fs                                                                                                                      | 215.0 <sup>a</sup> | -339.7 | 69.1  | 111.5 | 149.8 | 223.9 | 82.1  | 166.6 | 186.5 | 188.7 | 187.4 | 211.6 | 216.6 | 215.9 |
| H2O20es                                                                                                                      | 217.9 <sup>a</sup> | -342.3 | 64.5  | 117.6 | 151.0 | 229.4 | 80.4  | 167.3 | 186.7 | 189.0 | 188.6 | 212.1 | 217.0 | 216.3 |
| ... updated reference values for above four clusters (see main text) ...                                                     |                    |        |       |       |       |       |       |       |       |       |       |       |       |       |
| H2O20                                                                                                                        | 198.6 <sup>b</sup> | -322.0 | 33.4  | 106.9 | 143.6 | 224.8 | 73.5  | 160.1 | 175.9 | 177.9 | 188.8 | 207.9 | 212.1 | 211.6 |
| H2O20fc                                                                                                                      | 208.0 <sup>b</sup> | -341.8 | 82.2  | 110.8 | 149.8 | 211.9 | 81.6  | 164.1 | 184.9 | 187.0 | 186.3 | 207.2 | 212.0 | 211.3 |
| H2O20fs                                                                                                                      | 208.0 <sup>b</sup> | -339.7 | 69.1  | 111.5 | 149.8 | 223.9 | 82.1  | 166.6 | 186.5 | 188.7 | 187.4 | 211.6 | 216.6 | 215.9 |
| H2O20es                                                                                                                      | 209.7 <sup>b</sup> | -342.3 | 64.5  | 117.6 | 151.0 | 229.4 | 80.4  | 167.3 | 186.7 | 189.0 | 188.6 | 212.1 | 217.0 | 216.3 |
| H3OpH2O                                                                                                                      | 33.5 <sup>a</sup>  | 0.4    | 16.8  | 15.0  | 26.4  | 30.8  | 34.9  | 35.2  | 35.7  | 35.7  | 43.0  | 43.7  | 43.8  | 43.8  |
| H3OpH2O2                                                                                                                     | 56.9 <sup>a</sup>  | -1.1   | 25.9  | 31.5  | 42.9  | 52.3  | 53.1  | 56.2  | 57.3  | 57.3  | 65.5  | 66.8  | 67.0  | 67.0  |
| H3OpH2O3                                                                                                                     | 76.5 <sup>a</sup>  | -0.8   | 38.3  | 51.9  | 58.4  | 71.6  | 68.2  | 74.2  | 75.8  | 75.8  | 83.5  | 85.5  | 85.8  | 85.8  |
| H3OpH2O63d                                                                                                                   | 117.8 <sup>a</sup> | -45.3  | 63.3  | 76.9  | 90.7  | 112.9 | 89.2  | 107.3 | 112.0 | 112.3 | 118.5 | 124.2 | 125.3 | 125.1 |
| H3OpH2O62d                                                                                                                   | 114.9 <sup>a</sup> | -27.2  | 59.8  | 77.1  | 90.6  | 113.0 | 94.7  | 110.2 | 113.7 | 113.9 | 124.4 | 128.4 | 129.4 | 129.4 |
| OHmH2O                                                                                                                       | 26.6 <sup>a</sup>  | 1.6    | 19.8  | 20.3  | 33.9  | 35.9  | 27.0  | 34.9  | 35.3  | 35.3  | 41.4  | 41.7  | 41.9  | 41.9  |
| OHmH2O2                                                                                                                      | 48.4 <sup>a</sup>  | 1.3    | 31.9  | 41.7  | 52.2  | 57.8  | 42.9  | 53.6  | 54.4  | 54.4  | 61.0  | 61.9  | 62.3  | 62.3  |
| OHmH2O3                                                                                                                      | 67.6 <sup>a</sup>  | 0.6    | 45.6  | 62.2  | 69.5  | 79.0  | 56.3  | 70.1  | 71.5  | 71.6  | 78.3  | 80.0  | 80.5  | 80.5  |
| OHmH2O4c4                                                                                                                    | 84.8 <sup>a</sup>  | -6.5   | 62.4  | 79.1  | 82.7  | 95.3  | 67.4  | 82.4  | 85.4  | 85.4  | 88.6  | 92.4  | 92.7  | 92.7  |
| OHmH2O4cs                                                                                                                    | 84.8 <sup>a</sup>  | -20.9  | 58.2  | 69.5  | 82.8  | 92.4  | 64.5  | 82.0  | 85.4  | 85.4  | 89.7  | 93.9  | 94.4  | 94.4  |
| OHmH2O5                                                                                                                      | 100.7 <sup>a</sup> | -33.7  | 75.3  | 84.3  | 95.0  | 107.6 | 72.4  | 92.9  | 97.8  | 97.7  | 98.1  | 104.3 | 104.7 | 104.6 |
| OHmH2O6                                                                                                                      | 115.7 <sup>a</sup> | -48.8  | 81.5  | 93.6  | 107.1 | 122.6 | 78.8  | 104.7 | 110.7 | 110.6 | 111.3 | 118.8 | 119.6 | 119.4 |
| H3OpH2O6OHm                                                                                                                  | 28.5 <sup>a</sup>  | 101.9  | 103.0 | 77.8  | 26.9  | 24.9  | 44.2  | 20.3  | 21.3  | 21.1  | -0.0  | 1.3   | 1.0   | 1.0   |
| a L.Goerigk and S.Grimme, J.Chem.Theory Comput. 6, 107 (2010) ;                                                              |                    |        |       |       |       |       |       |       |       |       |       |       |       |       |
| ... continued on next page ...                                                                                               |                    |        |       |       |       |       |       |       |       |       |       |       |       |       |

Table S20: ... continued from previous page ...

| Species                                                                                                  | Ref.              | MNDO  | AMI  | PM3  | PM6  | PM7  | OM1  | OM2  | D2   | OM3  | D3   | D3T  | OM3  | D2   | D3   | D3T  |
|----------------------------------------------------------------------------------------------------------|-------------------|-------|------|------|------|------|------|------|------|------|------|------|------|------|------|------|
| V.S.Bryantsev, M.S.Diallo, A.C.T.van Duin, and W.A.Goddard III, J.Chem.Theory Comput. 5, 1016 (2009).    |                   |       |      |      |      |      |      |      |      |      |      |      |      |      |      |      |
| b T.Anacker and J.Friedrich, J.Comput.Chem. 35, 634 (2014).                                              |                   |       |      |      |      |      |      |      |      |      |      |      |      |      |      |      |
| S22                                                                                                      |                   |       |      |      |      |      |      |      |      |      |      |      |      |      |      |      |
| 01                                                                                                       | 3.2 <sup>a</sup>  | -4.5  | 0.7  | -0.8 | 2.3  | 4.3  | 1.4  | 2.0  | 2.5  | 2.5  | 2.5  | 2.5  | 2.1  | 2.9  | 2.8  | 2.8  |
| 02                                                                                                       | 5.0 <sup>a</sup>  | -7.0  | 2.9  | 2.6  | 3.9  | 4.9  | 2.7  | 4.2  | 4.5  | 4.5  | 4.5  | 4.5  | 4.5  | 5.0  | 5.1  | 5.1  |
| 03                                                                                                       | 18.8 <sup>a</sup> | -25.0 | -1.5 | 9.9  | 11.1 | 18.6 | 6.1  | 13.6 | 14.9 | 14.8 | 14.8 | 14.8 | 11.5 | 12.9 | 13.3 | 13.3 |
| 04                                                                                                       | 16.1 <sup>a</sup> | -16.4 | 5.7  | 8.1  | 12.6 | 16.6 | 7.9  | 13.0 | 14.3 | 14.3 | 14.3 | 14.3 | 11.7 | 13.2 | 13.5 | 13.5 |
| 05                                                                                                       | 20.7 <sup>a</sup> | -16.5 | 5.8  | 11.3 | 13.3 | 19.0 | 11.0 | 17.5 | 19.1 | 19.4 | 19.5 | 19.5 | 16.2 | 18.1 | 18.6 | 18.7 |
| 06                                                                                                       | 17.0 <sup>a</sup> | -15.1 | 4.4  | 7.5  | 10.0 | 17.9 | 7.1  | 11.0 | 12.9 | 13.3 | 13.4 | 13.4 | 11.3 | 13.7 | 14.2 | 14.3 |
| 07                                                                                                       | 16.7 <sup>a</sup> | -15.4 | 4.2  | 6.8  | 9.0  | 17.2 | 6.6  | 11.1 | 13.1 | 13.5 | 13.6 | 13.6 | 11.4 | 13.8 | 14.4 | 14.5 |
| 08                                                                                                       | 0.5 <sup>a</sup>  | -1.2  | -0.2 | 0.2  | 0.1  | 0.4  | -0.1 | -0.1 | 0.3  | 0.5  | 0.5  | 0.5  | -0.1 | 0.4  | 0.5  | 0.5  |
| 09                                                                                                       | 1.5 <sup>a</sup>  | -4.1  | 0.0  | 1.1  | 0.4  | 1.0  | -0.3 | 0.4  | 1.4  | 1.5  | 1.5  | 1.5  | -0.2 | 1.1  | 1.2  | 1.2  |
| 10                                                                                                       | 1.4 <sup>a</sup>  | -3.2  | -0.4 | 0.2  | 0.5  | 1.8  | -0.4 | 0.2  | 1.2  | 1.4  | 1.4  | 1.4  | -0.1 | 1.2  | 1.4  | 1.4  |
| 11                                                                                                       | 2.6 <sup>a</sup>  | -6.4  | -3.3 | -2.2 | -0.1 | 4.2  | -0.8 | -1.1 | 1.6  | 2.5  | 2.4  | 2.4  | -1.0 | 2.4  | 3.4  | 3.2  |
| 12                                                                                                       | 4.2 <sup>a</sup>  | -7.8  | -2.5 | -4.0 | 1.8  | 5.7  | 0.6  | 0.9  | 3.9  | 4.5  | 4.4  | 4.4  | 0.6  | 4.3  | 5.0  | 4.9  |
| 13                                                                                                       | 9.7 <sup>a</sup>  | -13.5 | -0.1 | -5.8 | 4.5  | 8.6  | 2.7  | 4.3  | 8.6  | 9.3  | 9.1  | 9.1  | 3.9  | 9.2  | 10.1 | 9.8  |
| 14                                                                                                       | 4.6 <sup>a</sup>  | -10.3 | -5.5 | -4.2 | -0.1 | 5.9  | -1.5 | -1.6 | 2.5  | 3.4  | 3.2  | 3.2  | -1.4 | 3.6  | 4.7  | 4.5  |
| 15                                                                                                       | 11.7 <sup>a</sup> | -18.7 | -2.9 | -7.4 | 4.9  | 11.4 | 2.1  | 4.0  | 10.3 | 10.9 | 10.6 | 10.6 | 3.3  | 11.0 | 11.8 | 11.5 |
| 16                                                                                                       | 1.5 <sup>a</sup>  | -1.6  | 0.4  | 0.9  | 0.6  | 1.0  | 0.2  | 1.1  | 1.5  | 1.6  | 1.6  | 1.6  | 0.6  | 1.2  | 1.3  | 1.3  |
| 17                                                                                                       | 3.3 <sup>a</sup>  | -4.6  | 0.7  | 1.4  | 2.3  | 2.8  | 0.9  | 2.3  | 3.4  | 3.5  | 3.5  | 3.5  | 1.9  | 3.2  | 3.4  | 3.4  |
| 18                                                                                                       | 2.3 <sup>a</sup>  | -3.5  | 0.4  | 0.6  | 1.6  | 2.9  | 0.3  | 1.3  | 2.3  | 2.5  | 2.5  | 2.5  | 0.8  | 2.1  | 2.4  | 2.3  |
| 19                                                                                                       | 4.5 <sup>a</sup>  | -6.0  | 0.8  | 1.6  | 2.0  | 3.1  | 0.7  | 3.1  | 4.4  | 4.5  | 4.5  | 4.5  | 1.7  | 3.4  | 3.6  | 3.6  |
| 20                                                                                                       | 2.7 <sup>a</sup>  | -5.5  | -0.3 | 0.5  | 0.7  | 3.3  | -0.5 | 0.7  | 2.4  | 2.8  | 2.8  | 2.8  | -0.1 | 2.1  | 2.5  | 2.5  |
| 21                                                                                                       | 5.6 <sup>a</sup>  | -8.7  | 1.0  | 1.2  | 2.4  | 6.0  | 0.1  | 2.4  | 4.8  | 5.3  | 5.2  | 5.2  | 1.2  | 4.2  | 4.7  | 4.6  |
| 22                                                                                                       | 7.1 <sup>a</sup>  | -12.5 | 1.2  | 1.2  | 3.3  | 6.3  | 1.9  | 3.9  | 5.9  | 6.3  | 6.2  | 6.2  | 3.3  | 5.7  | 6.2  | 6.1  |
| a L.Goerigk and S.Grimme, J.Chem.Theory Comput. 7, 291 (2011) ;                                          |                   |       |      |      |      |      |      |      |      |      |      |      |      |      |      |      |
| P.Jurečka, J.Šponer, J.Černý, and P.Hobza, Phys.Chem.Chem.Phys. 8, 1985 (2006) ;                         |                   |       |      |      |      |      |      |      |      |      |      |      |      |      |      |      |
| T.Takatani, E.G.Hohenstein, M.Malagoli, M.S.Marshall, and C.D.Sherrill, J.Chem.Phys. 132, 144104 (2010). |                   |       |      |      |      |      |      |      |      |      |      |      |      |      |      |      |
| ADIM6                                                                                                    |                   |       |      |      |      |      |      |      |      |      |      |      |      |      |      |      |
| AD2                                                                                                      | 1.3 <sup>a</sup>  | -3.1  | -0.0 | 1.0  | 0.3  | 1.2  | -0.2 | 0.0  | 1.0  | 1.2  | 1.2  | 1.2  | -0.3 | 1.0  | 1.2  | 1.2  |
| AD3                                                                                                      | 2.0 <sup>a</sup>  | -4.8  | 0.1  | 1.7  | 0.3  | 2.0  | -0.6 | 0.1  | 1.6  | 1.9  | 1.9  | 1.9  | -0.5 | 1.5  | 1.8  | 1.7  |
| AD4                                                                                                      | 2.8 <sup>a</sup>  | -6.7  | 0.1  | 2.5  | 0.5  | 3.0  | -0.8 | 0.2  | 2.5  | 2.9  | 2.8  | 2.8  | -0.6 | 2.3  | 2.7  | 2.6  |
| AD5                                                                                                      | 3.7 <sup>a</sup>  | -8.7  | 0.3  | 3.3  | 0.7  | 4.0  | -1.0 | 0.3  | 3.2  | 3.8  | 3.7  | 3.7  | -0.8 | 3.0  | 3.5  | 3.3  |
| AD6                                                                                                      | 4.6 <sup>a</sup>  | -10.9 | 0.2  | 4.0  | 0.7  | 4.9  | -1.4 | 0.4  | 4.1  | 4.8  | 4.6  | 4.6  | -1.0 | 3.8  | 4.4  | 4.2  |
| AD7                                                                                                      | 5.6 <sup>a</sup>  | -14.0 | 0.5  | 4.6  | 0.9  | 6.0  | -1.9 | 0.2  | 4.8  | 5.6  | 5.3  | 5.3  | -1.5 | 4.3  | 4.9  | 4.6  |
| a L.Goerigk and S.Grimme, J.Chem.Theory Comput. 7, 291 (2011) ;                                          |                   |       |      |      |      |      |      |      |      |      |      |      |      |      |      |      |
| S.Tsuzuki, K.Honda, T.Uchimaru, and M.Mikami, J.Chem.Phys. 124, 114304 (2006) ;                          |                   |       |      |      |      |      |      |      |      |      |      |      |      |      |      |      |
| H.Krieg and S.Grimme, Mol.Phys. 108, 2655 (2010).                                                        |                   |       |      |      |      |      |      |      |      |      |      |      |      |      |      |      |
| PCONF                                                                                                    |                   |       |      |      |      |      |      |      |      |      |      |      |      |      |      |      |
| 444                                                                                                      | 0.1 <sup>a</sup>  | 12.7  | 5.4  | -3.2 | 2.3  | 3.7  | 5.7  | 0.3  | 1.9  | 2.1  | 2.0  | 2.0  | -0.2 | 2.0  | 2.1  | 2.0  |
| 357                                                                                                      | 0.9 <sup>a</sup>  | 12.2  | 8.6  | 1.3  | 5.0  | 5.5  | 6.2  | 1.4  | 1.9  | 2.1  | 2.0  | 2.0  | 1.4  | 2.1  | 2.2  | 2.1  |
| 366                                                                                                      | 1.1 <sup>a</sup>  | -11.2 | -3.3 | -4.9 | 1.6  | 4.7  | -2.2 | -1.3 | 1.7  | 2.1  | 1.8  | 1.8  | -0.2 | 3.3  | 4.0  | 3.6  |
| 215                                                                                                      | 0.8 <sup>a</sup>  | 12.4  | 6.1  | -1.1 | 3.0  | 3.4  | 5.6  | 1.1  | 2.3  | 2.5  | 2.4  | 2.4  | 0.4  | 1.9  | 2.1  | 2.1  |
| 300                                                                                                      | 1.3 <sup>a</sup>  | -9.9  | -4.4 | -5.6 | -0.9 | 1.7  | -1.7 | -1.8 | 0.9  | 1.2  | 0.9  | 0.9  | -1.5 | 1.6  | 2.1  | 1.9  |

... continued on next page ...

Table S20: ... continued from previous page ...

| Species                                                                                                         | Ref.             | MNDO  | AMI  | PM3  | PM6  | PM7  | OM1  |      | OM2  |      | OM3  |      | OM3  |      | D3T  | D3T |
|-----------------------------------------------------------------------------------------------------------------|------------------|-------|------|------|------|------|------|------|------|------|------|------|------|------|------|-----|
|                                                                                                                 |                  |       |      |      |      |      | OM1  | PM7  | D2   | D3   | D3T  | D2   | D3   | D3T  |      |     |
| 114                                                                                                             | 1.9 <sup>a</sup> | 11.4  | 10.2 | 3.1  | 7.3  | 7.6  | 5.9  | 3.1  | 3.5  | 3.7  | 3.1  | 3.5  | 3.8  | 3.7  | 3.7  |     |
| 412                                                                                                             | 2.4 <sup>a</sup> | -2.8  | 1.0  | -0.4 | 1.3  | 2.8  | 0.3  | 1.2  | 1.7  | 1.7  | 0.0  | 0.6  | 0.7  | 0.6  | 0.6  |     |
| 691                                                                                                             | 2.1 <sup>a</sup> | -8.9  | -2.0 | -4.8 | 0.9  | 5.0  | -0.0 | -0.3 | 2.3  | 2.7  | 2.4  | 3.2  | 3.7  | 3.4  | 3.4  |     |
| 470                                                                                                             | 2.5 <sup>a</sup> | -4.4  | -2.6 | -2.2 | 1.3  | 4.6  | 0.1  | 1.1  | 2.8  | 3.0  | 0.9  | 2.9  | 3.3  | 3.1  | 3.1  |     |
| 224                                                                                                             | 2.0 <sup>a</sup> | 11.1  | 8.3  | -0.5 | 4.8  | 5.8  | 5.4  | 2.2  | 3.4  | 3.5  | 1.5  | 3.0  | 3.2  | 3.0  | 3.1  |     |
| a L.Goerigk and S.Grimme, J.Chem.Theory Comput. 6, 107 (2010) ;                                                 |                  |       |      |      |      |      |      |      |      |      |      |      |      |      |      |     |
| D.Řehača, H.Valdés, J.Vondrášek, P.Hobza, A.Abu-Riziq, B.Creus, and M.S.de Vries, Chem.–Eur.J. 11, 6803 (2005). |                  |       |      |      |      |      |      |      |      |      |      |      |      |      |      |     |
| ACONF                                                                                                           |                  |       |      |      |      |      |      |      |      |      |      |      |      |      |      |     |
| B_G                                                                                                             | 0.6 <sup>a</sup> | 1.3   | 0.9  | 0.6  | 0.7  | 0.7  | 0.8  | 0.9  | 0.7  | 0.7  | 1.0  | 0.7  | 0.8  | 0.7  | 0.8  |     |
| P_TG                                                                                                            | 0.6 <sup>a</sup> | 1.4   | 0.8  | 0.6  | 0.5  | 0.5  | 0.8  | 0.8  | 0.5  | 0.6  | 1.0  | 0.7  | 0.7  | 0.7  | 0.7  |     |
| P_GG                                                                                                            | 1.0 <sup>a</sup> | 3.6   | 2.0  | 1.5  | 1.4  | 1.4  | 1.9  | 2.0  | 1.3  | 1.5  | 2.4  | 1.6  | 1.7  | 1.6  | 1.8  |     |
| P_GX                                                                                                            | 2.8 <sup>a</sup> | 3.8   | 2.6  | 2.1  | 1.9  | 2.0  | 2.9  | 3.3  | 2.7  | 2.8  | 3.3  | 2.6  | 2.7  | 2.7  | 2.7  |     |
| H_gtt                                                                                                           | 0.6 <sup>a</sup> | 1.4   | 0.8  | 0.6  | 0.6  | 0.5  | 0.8  | 0.8  | 0.5  | 0.6  | 1.0  | 0.7  | 0.7  | 0.7  | 0.7  |     |
| H_tgt                                                                                                           | 0.6 <sup>a</sup> | 1.6   | 0.7  | 0.6  | 0.4  | 0.4  | 0.8  | 0.7  | 0.4  | 0.5  | 0.9  | 0.6  | 0.6  | 0.6  | 0.7  |     |
| H_tgg                                                                                                           | 0.9 <sup>a</sup> | 3.9   | 1.8  | 1.4  | 1.3  | 1.1  | 1.9  | 1.9  | 1.1  | 1.3  | 2.4  | 1.5  | 1.6  | 1.6  | 1.6  |     |
| H_gtg                                                                                                           | 1.2 <sup>a</sup> | 3.0   | 1.6  | 1.2  | 1.2  | 1.0  | 1.5  | 1.6  | 1.0  | 1.2  | 1.9  | 1.3  | 1.4  | 1.4  | 1.4  |     |
| H_g+t+g-                                                                                                        | 1.3 <sup>a</sup> | 2.8   | 1.7  | 1.2  | 1.1  | 1.0  | 1.7  | 1.7  | 1.2  | 1.3  | 2.0  | 1.3  | 1.5  | 1.5  | 1.5  |     |
| H_ggg                                                                                                           | 1.2 <sup>a</sup> | 6.1   | 2.9  | 2.1  | 2.1  | 1.8  | 2.9  | 2.9  | 1.8  | 2.1  | 3.7  | 2.3  | 2.5  | 2.6  | 2.6  |     |
| H_g+x+t+                                                                                                        | 2.6 <sup>a</sup> | 4.2   | 2.5  | 2.0  | 1.8  | 1.6  | 2.8  | 3.1  | 2.5  | 2.6  | 3.2  | 2.4  | 2.5  | 2.6  | 2.6  |     |
| H_t+g+x-                                                                                                        | 2.7 <sup>a</sup> | 4.2   | 2.5  | 2.0  | 1.7  | 1.7  | 2.9  | 3.1  | 2.5  | 2.6  | 3.2  | 2.4  | 2.5  | 2.6  | 2.6  |     |
| H_g+x-g-                                                                                                        | 3.3 <sup>a</sup> | 5.6   | 3.1  | 2.4  | 2.3  | 2.0  | 3.6  | 3.8  | 2.9  | 3.1  | 4.0  | 2.9  | 3.1  | 3.1  | 3.1  |     |
| H_x+g-g-                                                                                                        | 3.1 <sup>a</sup> | 6.4   | 3.7  | 2.6  | 2.5  | 2.4  | 4.2  | 4.3  | 3.2  | 3.4  | 4.6  | 3.1  | 3.4  | 3.4  | 3.4  |     |
| H_x+g-x+                                                                                                        | 4.9 <sup>a</sup> | 7.7   | 4.9  | 3.9  | 3.3  | 3.4  | 5.8  | 6.1  | 5.0  | 5.2  | 6.1  | 4.5  | 4.8  | 4.9  | 4.9  |     |
| a L.Goerigk and S.Grimme, J.Chem.Theory Comput. 6, 107 (2010) ;                                                 |                  |       |      |      |      |      |      |      |      |      |      |      |      |      |      |     |
| D.Gruzman, A.Karton, and J.M.L.Martin, J.Phys.Chem.A 113, 11974 (2009).                                         |                  |       |      |      |      |      |      |      |      |      |      |      |      |      |      |     |
| SCONF                                                                                                           |                  |       |      |      |      |      |      |      |      |      |      |      |      |      |      |     |
| C2                                                                                                              | 0.8 <sup>a</sup> | 0.6   | 0.8  | 0.3  | 0.7  | 0.6  | 0.5  | 0.2  | 0.1  | 0.1  | 0.4  | 0.3  | 0.3  | 0.3  | 0.3  |     |
| C3                                                                                                              | 2.6 <sup>a</sup> | -8.7  | 3.0  | 2.7  | 3.9  | 3.8  | -2.5 | 1.3  | 1.8  | 1.7  | 1.8  | 2.4  | 2.4  | 2.4  | 2.4  |     |
| C4                                                                                                              | 3.4 <sup>a</sup> | -8.4  | 3.6  | 2.9  | 4.5  | 4.3  | -2.2 | 1.3  | 1.8  | 1.7  | 2.1  | 2.5  | 2.6  | 2.6  | 2.6  |     |
| C5                                                                                                              | 4.9 <sup>a</sup> | -11.4 | 3.1  | 2.8  | 5.1  | 6.8  | 0.4  | 5.3  | 5.9  | 5.7  | 5.7  | 6.3  | 6.3  | 6.3  | 6.3  |     |
| C6                                                                                                              | 5.2 <sup>a</sup> | -11.4 | 2.7  | 2.8  | 4.4  | 6.3  | 0.7  | 5.0  | 5.6  | 5.4  | 5.2  | 5.9  | 5.9  | 5.9  | 5.9  |     |
| C7                                                                                                              | 4.5 <sup>a</sup> | -13.2 | 3.0  | 2.4  | 4.9  | 5.5  | -2.5 | 2.1  | 2.5  | 2.3  | 3.0  | 3.2  | 3.3  | 3.4  | 3.4  |     |
| C8                                                                                                              | 4.7 <sup>a</sup> | -14.2 | 2.6  | 2.1  | 5.1  | 5.8  | -2.2 | 2.6  | 3.0  | 2.8  | 3.7  | 4.0  | 4.1  | 4.1  | 4.1  |     |
| C9                                                                                                              | 6.7 <sup>a</sup> | -16.9 | 2.4  | 1.5  | 4.8  | 6.7  | 0.5  | 5.7  | 6.5  | 6.2  | 6.3  | 7.0  | 7.2  | 7.2  | 7.2  |     |
| C10                                                                                                             | 6.8 <sup>a</sup> | -18.0 | 2.5  | 2.0  | 5.0  | 7.0  | -0.9 | 4.4  | 5.2  | 5.0  | 5.4  | 6.2  | 6.3  | 6.3  | 6.3  |     |
| C11                                                                                                             | 6.1 <sup>a</sup> | -15.5 | 3.0  | 2.4  | 6.5  | 7.2  | -1.3 | 3.3  | 3.9  | 3.6  | 4.8  | 5.3  | 5.4  | 5.4  | 5.4  |     |
| C12                                                                                                             | 6.0 <sup>a</sup> | -14.6 | 3.4  | 2.7  | 6.5  | 7.0  | -1.6 | 2.8  | 3.4  | 3.2  | 4.2  | 4.7  | 4.8  | 4.8  | 4.8  |     |
| C13                                                                                                             | 6.2 <sup>a</sup> | -8.0  | 4.7  | 4.3  | 4.6  | 6.6  | 1.3  | 5.0  | 5.4  | 5.2  | 6.8  | 6.9  | 7.1  | 7.1  | 7.1  |     |
| C14                                                                                                             | 6.8 <sup>a</sup> | -15.1 | 2.8  | 2.2  | 5.0  | 6.8  | -0.0 | 4.5  | 5.2  | 4.9  | 5.5  | 6.2  | 6.2  | 6.1  | 6.1  |     |
| C15                                                                                                             | 6.7 <sup>a</sup> | -16.1 | 1.7  | 0.6  | 4.1  | 5.8  | -0.7 | 3.6  | 4.2  | 3.9  | 5.0  | 5.5  | 5.5  | 5.5  | 5.5  |     |
| G2                                                                                                              | 0.3 <sup>a</sup> | 4.5   | 0.1  | 0.3  | -0.6 | -0.6 | 0.6  | -0.4 | -0.5 | -0.5 | -0.5 | -0.6 | -0.6 | -0.6 | -0.6 |     |
| G3                                                                                                              | 5.9 <sup>a</sup> | 28.7  | 0.8  | 0.4  | -9.1 | -8.7 | 12.5 | 3.4  | 1.7  | 2.2  | 1.8  | 0.1  | -0.1 | -0.0 | -0.0 |     |
| G4                                                                                                              | 5.3 <sup>a</sup> | 33.8  | 7.5  | -1.3 | -8.3 | -8.3 | 16.5 | 5.0  | 3.3  | 3.6  | 1.9  | 0.2  | 0.1  | 0.1  | 0.1  |     |
| a L.Goerigk and S.Grimme, J.Chem.Theory Comput. 6, 107 (2010) ;                                                 |                  |       |      |      |      |      |      |      |      |      |      |      |      |      |      |     |
| ... continued on next page ...                                                                                  |                  |       |      |      |      |      |      |      |      |      |      |      |      |      |      |     |

Table S20: ... continued from previous page ...

| Species | Ref. | MNDO | AM1 | PM3 | PM6 | PM7 | OM1 | OM2 | OM3 | OM3 | D2 | D3 | D3T |
|---------|------|------|-----|-----|-----|-----|-----|-----|-----|-----|----|----|-----|
|         |      |      |     |     |     |     |     | D2  | D3  | D3T | D2 | D3 | D3T |

G.I.Csonka, A.D.French, G.P.Johnson, and C.A.Stortz, *J.Chem.Theory Comput.* 5, 679 (2009).

Notes: (i) SCF calculations of the  $C_2H$  radical during thermochemical calculations (for correcting the W4-08 and W4-08woMR subsets energies) could not be converged with many methods with tight SCF convergence criteria, thus criteria for both energy and density matrix were reduced to  $10^{-6}$ . Similarly, convergence criteria were reduced for many artificial molecules in the MB08-165 subset. (ii) We were able to converge SCF for  $C_{20}$  isomers to lower electronic energy than in Ref. S3, thus our values are somewhat lower.

Table S21: Benchmark Results for the CE345-CHNOF Data Set. Energies (kcal/mol). In the Column "Species" Is Given Only One of the Species, Energy of Which Was Used to Derive Final Energy. The Same Species May Be Involved in Different Relative or Reaction Energies, Thus Check Reference Value to Attribute Each of Entries to Specific Reaction in CE345 Set

| Species    | Ref.                | MGAE109/11 (ZPVE-exclusive, 0 K) |        |        |        |        |        |        |        |        |        |        |        |        |
|------------|---------------------|----------------------------------|--------|--------|--------|--------|--------|--------|--------|--------|--------|--------|--------|--------|
|            |                     | MNDO                             | AMI    | PM3    | PM6    | PM7    | OM1    | OM2    | OM2    |        | OM3    |        |        |        |
|            |                     |                                  |        |        |        |        |        |        | D2     | D3     | D3T    | D2     | D3     | D3T    |
| C2F4       | 591.1 <sup>a</sup>  | 599.6                            | 594.5  | 592.3  | 593.1  | 592.2  | 581.3  | 578.6  | 580.1  | 580.0  | 580.0  | 580.3  | 581.1  | 582.5  |
| C2H2       | 405.5 <sup>a</sup>  | 403.0                            | 405.3  | 409.0  | 401.4  | 401.1  | 407.3  | 404.5  | 404.9  | 405.2  | 405.2  | 404.1  | 404.3  | 405.2  |
| C2H4       | 563.7 <sup>a</sup>  | 561.4                            | 558.7  | 558.1  | 556.9  | 559.1  | 565.5  | 562.8  | 563.7  | 564.0  | 564.0  | 561.3  | 561.8  | 563.3  |
| C2H4O      | 651.1 <sup>a</sup>  | 652.8                            | 645.9  | 643.8  | 642.5  | 645.7  | 654.9  | 650.5  | 651.9  | 652.0  | 652.0  | 645.4  | 646.1  | 647.9  |
| C2H5       | 603.9 <sup>a</sup>  | 621.1                            | 612.8  | 614.1  | 611.3  | 611.8  | 608.3  | 606.3  | 607.5  | 607.7  | 607.7  | 606.2  | 606.9  | 608.5  |
| C2H5O      | 699.0 <sup>a</sup>  | 699.6                            | 700.5  | 701.7  | 689.7  | 695.7  | 700.6  | 698.0  | 699.8  | 699.9  | 699.9  | 696.1  | 697.2  | 699.2  |
| C2H5OCH3   | 1095.6 <sup>a</sup> | 1098.9                           | 1099.5 | 1093.8 | 1086.7 | 1088.0 | 1097.3 | 1092.9 | 1096.3 | 1096.4 | 1096.4 | 1089.5 | 1092.0 | 1094.9 |
| C2H6       | 713.0 <sup>a</sup>  | 712.8                            | 707.2  | 709.7  | 703.3  | 706.1  | 714.2  | 712.4  | 714.0  | 714.2  | 714.2  | 711.5  | 712.4  | 714.3  |
| C3H4.all   | 703.5 <sup>a</sup>  | 706.0                            | 701.9  | 700.5  | 707.8  | 708.8  | 705.0  | 702.8  | 703.9  | 704.4  | 704.4  | 702.8  | 703.3  | 705.4  |
| C3H4.cyc   | 683.0 <sup>a</sup>  | 681.3                            | 673.8  | 679.9  | 684.1  | 682.1  | 687.0  | 680.2  | 681.6  | 681.9  | 681.9  | 682.0  | 682.7  | 684.7  |
| C3H4.pro   | 705.1 <sup>a</sup>  | 708.6                            | 703.8  | 707.8  | 700.0  | 699.5  | 704.8  | 702.8  | 704.0  | 704.4  | 704.4  | 702.8  | 703.4  | 705.4  |
| C3H6       | 853.7 <sup>a</sup>  | 854.6                            | 846.9  | 847.7  | 849.1  | 849.0  | 861.0  | 855.7  | 858.0  | 858.0  | 858.0  | 854.5  | 855.9  | 858.3  |
| C3H8       | 1007.1 <sup>a</sup> | 1007.5                           | 1003.0 | 1004.0 | 996.3  | 999.1  | 1009.4 | 1005.5 | 1008.7 | 1008.7 | 1008.7 | 1004.7 | 1006.9 | 1009.7 |
| C4H10.anti | 1301.7 <sup>a</sup> | 1301.9                           | 1298.5 | 1298.2 | 1289.2 | 1292.2 | 1304.5 | 1298.7 | 1303.4 | 1303.3 | 1303.3 | 1298.0 | 1301.6 | 1305.3 |
| C4H10.iso  | 1303.4 <sup>a</sup> | 1298.4                           | 1297.0 | 1299.0 | 1290.3 | 1292.5 | 1302.7 | 1300.9 | 1306.0 | 1305.8 | 1305.8 | 1299.3 | 1306.9 | 1306.9 |
| C4H12      | 994.3 <sup>a</sup>  | 994.1                            | 979.1  | 987.0  | 987.4  | 986.9  | 987.9  | 986.6  | 988.8  | 989.5  | 989.5  | 984.9  | 985.9  | 989.6  |
| C4H5N      | 1071.9 <sup>a</sup> | 1065.0                           | 1055.3 | 1067.0 | 1065.3 | 1066.4 | 1061.1 | 1061.9 | 1064.7 | 1065.5 | 1065.5 | 1059.1 | 1060.6 | 1064.9 |
| C4H6.bic   | 987.6 <sup>a</sup>  | 969.7                            | 957.3  | 965.9  | 970.2  | 964.8  | 981.6  | 975.7  | 978.7  | 978.7  | 978.7  | 976.7  | 978.6  | 981.5  |
| C4H6.cyc   | 1002.0 <sup>a</sup> | 1010.2                           | 992.7  | 1000.6 | 1000.5 | 997.3  | 1001.9 | 996.7  | 999.6  | 999.8  | 999.8  | 996.6  | 998.4  | 1001.6 |
| C4H6.tra   | 1012.7 <sup>a</sup> | 1010.9                           | 1008.0 | 1005.8 | 1005.3 | 1007.3 | 1012.6 | 1008.4 | 1011.0 | 1011.5 | 1011.5 | 1006.8 | 1008.5 | 1011.7 |
| C4H6.yne   | 1004.5 <sup>a</sup> | 1014.4                           | 1002.4 | 1006.8 | 997.8  | 997.9  | 1002.3 | 1000.9 | 1003.0 | 1003.6 | 1003.6 | 1001.3 | 1002.3 | 1005.5 |
| C4H8.cyc   | 1149.4 <sup>a</sup> | 1162.6                           | 1148.9 | 1152.3 | 1147.9 | 1146.9 | 1156.3 | 1148.3 | 1152.5 | 1152.4 | 1152.4 | 1147.5 | 1150.4 | 1153.9 |
| C4H8.iso   | 1159.0 <sup>a</sup> | 1157.2                           | 1153.3 | 1156.7 | 1152.7 | 1154.0 | 1157.1 | 1158.0 | 1161.7 | 1161.9 | 1161.9 | 1156.7 | 1159.4 | 1162.9 |
| C4H9.t     | 1199.7 <sup>a</sup> | 1217.9                           | 1208.6 | 1214.4 | 1207.9 | 1207.7 | 1205.2 | 1207.0 | 1211.1 | 1211.3 | 1211.3 | 1207.2 | 1210.2 | 1213.8 |
| C5H5N      | 1238.1 <sup>a</sup> | 1242.1                           | 1237.8 | 1237.4 | 1231.1 | 1235.5 | 1239.6 | 1239.3 | 1242.9 | 1243.8 | 1243.8 | 1238.1 | 1239.8 | 1245.3 |
| C5H8.spi   | 1284.7 <sup>a</sup> | 1294.0                           | 1276.5 | 1282.9 | 1287.6 | 1283.4 | 1292.7 | 1285.1 | 1289.7 | 1289.6 | 1289.5 | 1285.5 | 1288.2 | 1292.3 |
| C6H6       | 1368.1 <sup>a</sup> | 1366.8                           | 1364.8 | 1361.7 | 1357.9 | 1360.7 | 1372.3 | 1367.6 | 1371.8 | 1372.6 | 1372.6 | 1366.7 | 1368.8 | 1374.7 |
| CCH        | 265.3 <sup>a</sup>  | 235.6                            | 253.2  | 239.2  | 267.2  | 264.4  | 252.9  | 283.8  | 284.1  | 284.2  | 284.2  | 275.0  | 275.1  | 275.7  |
| CF3CN      | 641.2 <sup>a</sup>  | 632.3                            | 634.0  | 633.7  | 640.2  | 638.8  | 646.9  | 644.6  | 646.0  | 646.1  | 646.1  | 641.8  | 642.5  | 644.3  |
| CF4        | 477.9 <sup>a</sup>  | 464.1                            | 472.7  | 477.3  | 471.8  | 469.4  | 467.0  | 469.6  | 470.5  | 470.5  | 470.5  | 467.7  | 468.0  | 469.2  |
| CH         | 84.2 <sup>a</sup>   | 83.0                             | 81.3   | 79.3   | 83.9   | 86.2   | 89.2   | 86.0   | 86.0   | 86.1   | 86.1   | 88.0   | 88.0   | 88.2   |
| CH2.1A1    | 181.5 <sup>a</sup>  | 175.8                            | 171.9  | 170.4  | 175.3  | 178.2  | 182.1  | 178.4  | 178.6  | 178.7  | 178.7  | 181.0  | 181.0  | 181.4  |
| CH2.3B1    | 190.8 <sup>a</sup>  | 205.4                            | 201.7  | 207.1  | 201.3  | 197.4  | 193.5  | 191.5  | 191.7  | 191.8  | 191.8  | 193.6  | 193.7  | 194.0  |
| CH2CH      | 446.1 <sup>a</sup>  | 448.5                            | 447.6  | 450.2  | 451.0  | 450.5  | 451.4  | 448.7  | 449.3  | 449.6  | 449.6  | 449.9  | 450.1  | 451.3  |
| CH2OH      | 410.1 <sup>a</sup>  | 436.5                            | 430.6  | 427.0  | 423.0  | 420.6  | 419.9  | 413.5  | 414.3  | 414.3  | 414.3  | 414.3  | 414.6  | 415.5  |
| CH3        | 307.9 <sup>a</sup>  | 318.0                            | 311.3  | 312.4  | 311.7  | 311.9  | 306.5  | 308.3  | 308.6  | 308.7  | 308.7  | 305.8  | 306.1  | 306.6  |
| CH3CH2OH   | 810.8 <sup>a</sup>  | 817.2                            | 814.9  | 809.5  | 802.0  | 804.0  | 814.8  | 806.9  | 809.0  | 809.1  | 809.1  | 806.5  | 808.0  | 810.1  |
| CH3CHCH2   | 860.9 <sup>a</sup>  | 861.3                            | 857.0  | 857.5  | 854.7  | 856.7  | 862.8  | 859.7  | 861.8  | 862.1  | 862.1  | 858.9  | 860.2  | 862.7  |
| CH3CHCH3   | 901.0 <sup>a</sup>  | 921.0                            | 911.7  | 914.9  | 910.3  | 910.6  | 907.8  | 906.0  | 908.5  | 908.7  | 908.7  | 906.7  | 908.3  | 911.0  |

... continued on next page ...

Table S21: ... continued from previous page ...

| Species  | Ref.               | MNDO  | AMI   | PM3   | PM6   | PM7   | OM1   |       | OM2   |       | OM3   |       | OM3   |       | D3T   |
|----------|--------------------|-------|-------|-------|-------|-------|-------|-------|-------|-------|-------|-------|-------|-------|-------|
|          |                    |       |       |       |       |       | D2    | D3    | D2    | D3    | D2    | D3    | D2    | D3    |       |
| CH3CHO   | 677.4 <sup>a</sup> | 680.4 | 677.4 | 681.0 | 672.1 | 675.3 | 684.1 | 680.3 | 681.7 | 681.9 | 682.3 | 683.0 | 684.9 | 684.9 | 684.9 |
| CH3CN    | 616.0 <sup>a</sup> | 614.9 | 612.8 | 609.5 | 610.1 | 612.5 | 618.2 | 615.5 | 616.5 | 616.9 | 613.8 | 614.3 | 616.0 | 616.0 | 616.0 |
| CH3CO    | 582.0 <sup>a</sup> | 589.9 | 586.0 | 595.1 | 592.9 | 591.8 | 599.1 | 594.6 | 595.5 | 595.8 | 597.2 | 598.3 | 599.9 | 599.9 | 599.9 |
| CH3COCH3 | 978.5 <sup>a</sup> | 976.0 | 972.0 | 979.3 | 975.7 | 977.2 | 981.2 | 983.8 | 986.5 | 986.8 | 984.4 | 986.2 | 989.1 | 989.1 | 989.1 |
| CH3COOH  | 803.7 <sup>a</sup> | 797.9 | 799.1 | 799.5 | 793.6 | 795.8 | 802.2 | 797.8 | 799.5 | 799.9 | 797.4 | 798.5 | 800.8 | 800.8 | 800.8 |
| CH3NH2   | 582.3 <sup>a</sup> | 585.4 | 582.3 | 581.1 | 574.6 | 576.0 | 582.6 | 578.7 | 579.9 | 580.2 | 578.4 | 579.2 | 580.8 | 580.8 | 580.8 |
| CH3NO2   | 601.8 <sup>a</sup> | 577.7 | 590.3 | 596.5 | 595.7 | 596.3 | 589.3 | 597.2 | 598.7 | 599.0 | 591.9 | 592.8 | 594.8 | 594.8 | 594.8 |
| CH3OCH3  | 798.5 <sup>a</sup> | 804.1 | 805.1 | 800.2 | 792.6 | 793.2 | 798.6 | 796.9 | 799.1 | 799.1 | 793.6 | 795.1 | 797.1 | 797.1 | 797.1 |
| CH3OH    | 513.5 <sup>a</sup> | 522.4 | 520.5 | 515.7 | 508.1 | 509.3 | 516.1 | 510.9 | 511.8 | 511.9 | 510.8 | 511.3 | 512.4 | 512.4 | 512.4 |
| CH4      | 420.4 <sup>a</sup> | 415.0 | 409.8 | 415.8 | 411.3 | 413.5 | 417.9 | 421.7 | 422.2 | 422.4 | 420.2 | 421.4 | 421.3 | 421.3 | 421.3 |
| CHF3     | 458.7 <sup>a</sup> | 453.1 | 458.1 | 450.9 | 450.1 | 444.5 | 446.8 | 452.4 | 453.1 | 453.2 | 449.2 | 449.5 | 450.5 | 450.5 | 450.5 |
| CN       | 181.4 <sup>a</sup> | 156.8 | 171.4 | 158.0 | 182.2 | 181.3 | 173.6 | 174.6 | 174.7 | 174.8 | 174.8 | 181.6 | 181.9 | 181.9 | 181.9 |
| CO       | 259.7 <sup>a</sup> | 236.9 | 235.7 | 252.6 | 246.1 | 250.7 | 262.9 | 250.4 | 250.4 | 250.5 | 250.5 | 250.5 | 250.8 | 250.8 | 250.8 |
| CO2      | 390.2 <sup>a</sup> | 368.1 | 372.2 | 378.6 | 379.2 | 379.0 | 384.7 | 370.7 | 371.0 | 371.2 | 377.1 | 377.1 | 377.8 | 377.8 | 377.8 |
| F2       | 39.0 <sup>a</sup>  | 18.0  | 60.5  | 59.2  | 37.5  | 54.4  | 26.0  | 37.7  | 37.7  | 37.8  | 36.4  | 36.4  | 36.5  | 36.5  | 36.5  |
| H2       | 109.5 <sup>a</sup> | 106.5 | 113.1 | 122.4 | 136.4 | 143.1 | 106.7 | 110.9 | 110.9 | 111.0 | 108.9 | 108.9 | 109.0 | 109.0 | 109.0 |
| H2CCO    | 532.7 <sup>a</sup> | 527.8 | 525.1 | 529.4 | 537.2 | 537.6 | 531.9 | 524.2 | 524.8 | 525.2 | 529.6 | 529.6 | 531.2 | 531.2 | 531.2 |
| H2CO     | 374.7 <sup>a</sup> | 381.5 | 378.9 | 381.5 | 367.0 | 372.0 | 382.8 | 377.3 | 377.3 | 377.9 | 378.5 | 378.5 | 379.5 | 379.5 | 379.5 |
| H2O      | 233.0 <sup>a</sup> | 236.7 | 233.7 | 228.7 | 225.2 | 229.6 | 232.0 | 229.4 | 229.5 | 229.6 | 230.3 | 230.3 | 230.7 | 230.7 | 230.7 |
| HCN      | 313.4 <sup>a</sup> | 309.7 | 313.5 | 311.2 | 310.4 | 313.8 | 320.7 | 318.2 | 318.4 | 318.6 | 315.7 | 315.7 | 316.4 | 316.4 | 316.4 |
| HCO      | 279.4 <sup>a</sup> | 286.0 | 286.9 | 296.7 | 287.7 | 287.1 | 294.7 | 287.6 | 287.7 | 287.9 | 291.3 | 291.4 | 291.9 | 291.9 | 291.9 |
| HCOCOH   | 634.0 <sup>a</sup> | 644.6 | 640.8 | 646.6 | 626.6 | 633.6 | 645.9 | 640.3 | 641.5 | 641.8 | 642.2 | 642.7 | 644.5 | 644.5 | 644.5 |
| HCOOCH3  | 785.9 <sup>a</sup> | 780.5 | 786.8 | 783.3 | 778.3 | 779.3 | 782.7 | 775.9 | 778.4 | 778.0 | 773.3 | 774.5 | 776.6 | 776.6 | 776.6 |
| HCOOH    | 501.5 <sup>a</sup> | 500.6 | 504.7 | 502.3 | 492.8 | 495.5 | 501.6 | 492.7 | 493.3 | 493.6 | 492.5 | 492.7 | 494.0 | 494.0 | 494.0 |
| HF       | 141.6 <sup>a</sup> | 134.9 | 145.5 | 138.7 | 137.6 | 137.5 | 137.1 | 137.2 | 137.2 | 137.2 | 139.9 | 139.9 | 140.0 | 140.0 | 140.0 |
| HOOH     | 269.0 <sup>a</sup> | 260.0 | 262.9 | 275.8 | 255.6 | 262.8 | 271.6 | 267.1 | 267.4 | 267.5 | 266.9 | 267.3 | 267.7 | 267.7 | 267.7 |
| N2       | 228.5 <sup>a</sup> | 220.6 | 217.7 | 211.3 | 187.3 | 194.7 | 233.5 | 226.1 | 226.2 | 226.3 | 215.2 | 215.2 | 215.6 | 215.6 | 215.6 |
| NF3      | 205.7 <sup>a</sup> | 202.7 | 214.3 | 197.2 | 202.4 | 202.2 | 210.3 | 204.0 | 204.4 | 204.5 | 208.8 | 208.9 | 209.7 | 209.7 | 209.7 |
| NH       | 83.1 <sup>a</sup>  | 92.1  | 90.3  | 93.7  | 84.7  | 86.0  | 88.9  | 83.4  | 83.4  | 83.5  | 88.7  | 88.7  | 88.9  | 88.9  | 88.9  |
| NH2      | 182.6 <sup>a</sup> | 190.5 | 188.1 | 190.3 | 180.5 | 181.8 | 185.6 | 178.7 | 178.8 | 179.0 | 186.1 | 186.1 | 186.5 | 186.5 | 186.5 |
| NH2NH2   | 438.6 <sup>a</sup> | 445.4 | 444.0 | 437.7 | 438.8 | 439.3 | 445.4 | 435.3 | 436.1 | 436.5 | 436.1 | 436.6 | 437.9 | 437.9 | 437.9 |
| NH3      | 298.0 <sup>a</sup> | 294.7 | 294.4 | 290.8 | 287.5 | 288.0 | 291.6 | 292.2 | 292.2 | 292.4 | 296.0 | 296.1 | 296.7 | 296.7 | 296.7 |
| NO       | 152.8 <sup>a</sup> | 173.8 | 171.5 | 159.2 | 146.2 | 151.6 | 168.4 | 149.8 | 149.9 | 150.0 | 158.3 | 158.4 | 158.6 | 158.6 | 158.6 |
| O2       | 120.8 <sup>a</sup> | 129.1 | 131.2 | 123.9 | 130.7 | 125.3 | 127.4 | 117.0 | 117.0 | 117.1 | 123.7 | 123.7 | 123.9 | 123.9 | 123.9 |
| OH       | 107.2 <sup>a</sup> | 115.5 | 114.8 | 112.9 | 100.2 | 107.1 | 112.2 | 109.9 | 109.9 | 109.9 | 110.6 | 110.6 | 110.7 | 110.7 | 110.7 |

a Y. Zhao, N.E. Schultz, and D.G. Truhlar, J.Chem.Theory Comput. 2, 364-382 (2006) ;

R. Peverati and D.G. Truhlar, J.Chem.Phys. 135, 191102 (2011).

MRBE10

|    |                    |       |       |      |       |       |       |       |       |       |       |       |       |       |       |
|----|--------------------|-------|-------|------|-------|-------|-------|-------|-------|-------|-------|-------|-------|-------|-------|
| c2 | 146.9 <sup>a</sup> | 101.5 | 119.5 | 81.1 | 148.6 | 135.3 | 109.3 | 145.4 | 145.4 | 145.6 | 123.5 | 123.5 | 124.0 | 124.0 | 124.0 |
| o3 | 26.6 <sup>a</sup>  | -11.3 | -12.6 | 1.0  | -4.8  | 11.7  | 3.2   | 23.9  | 24.0  | 24.1  | 7.9   | 7.9   | 8.3   | 8.3   | 8.3   |

Isol6/11

|            |                   |      |      |      |      |      |      |      |      |      |      |      |      |      |      |
|------------|-------------------|------|------|------|------|------|------|------|------|------|------|------|------|------|------|
| 10-product | 6.8 <sup>a</sup>  | 4.9  | 10.2 | 10.8 | 1.7  | 3.2  | 1.8  | 5.6  | 6.8  | 6.4  | 6.2  | 6.2  | 7.2  | 7.5  | 7.5  |
| 13-product | 33.5 <sup>a</sup> | 33.0 | 44.2 | 36.5 | 30.9 | 33.6 | 15.4 | 27.6 | 28.4 | 28.0 | 37.8 | 38.5 | 38.4 | 38.4 | 38.4 |

... continued on next page ...

Table S21: ... continued from previous page ...

| Species         | Ref.               | MNDO                                                                                 | AMI   | PM3   | PM6   | PM7   | OM1   |       | OM2   |       | OM3   |       | OM3   |       |  |
|-----------------|--------------------|--------------------------------------------------------------------------------------|-------|-------|-------|-------|-------|-------|-------|-------|-------|-------|-------|-------|--|
|                 |                    |                                                                                      |       |       |       |       | D2    | D3    | D2    | D3    | D2    | D3    | D2    | D3    |  |
| 14-product      | 5.3 <sup>a</sup>   | -12.8                                                                                | 3.2   | 4.9   | 6.1   | 8.4   | -0.6  | 7.6   | 8.6   | 8.4   | 9.2   | 9.9   | 10.4  | 10.3  |  |
| 20-product      | 4.7 <sup>a</sup>   | 10.4                                                                                 | 10.2  | 10.6  | 5.3   | 4.6   | -1.0  | 3.2   | 2.8   | 2.7   | 4.7   | 4.3   | 4.3   | 4.3   |  |
| 3-product       | 9.8 <sup>a</sup>   | 25.8                                                                                 | 11.1  | 4.0   | 14.3  | 7.0   | 9.2   | 10.2  | 10.2  | 10.0  | 1.9   | 1.6   | 1.7   | 1.7   |  |
| 9-product       | 21.8 <sup>a</sup>  | 8.6                                                                                  | 16.9  | 18.3  | 21.0  | 19.1  | 11.0  | 22.3  | 24.6  | 23.6  | 19.3  | 21.2  | 21.2  | 21.1  |  |
|                 |                    | a S. Luo, Y. Zhao, and D.G. Truhlar, Phys.Chem.Chem.Phys. 13, 13683-13689 (2011).    |       |       |       |       |       |       |       |       |       |       |       |       |  |
|                 |                    | IP21                                                                                 |       |       |       |       |       |       |       |       |       |       |       |       |  |
| C+              | 259.7 <sup>a</sup> | 218.5                                                                                | 227.9 | 227.4 | 202.0 | 189.6 | 208.3 | 230.9 | 230.9 | 230.9 | 230.9 | 227.7 | 227.7 | 227.7 |  |
| O+              | 313.7 <sup>a</sup> | 283.6                                                                                | 294.3 | 294.4 | 220.8 | 243.0 | 279.0 | 309.7 | 309.7 | 309.7 | 309.1 | 309.1 | 309.1 | 309.1 |  |
| O2+             | 278.9 <sup>a</sup> | 268.4                                                                                | 257.9 | 263.1 | 241.7 | 238.4 | 261.4 | 296.7 | 296.7 | 296.7 | 288.7 | 288.7 | 288.7 | 288.7 |  |
| OH+             | 298.9 <sup>a</sup> | 279.5                                                                                | 285.5 | 288.4 | 241.2 | 256.6 | 275.1 | 296.6 | 296.6 | 296.6 | 297.7 | 297.7 | 297.7 | 297.7 |  |
|                 |                    | a Y. Zhao, N.E. Schultz, and D.G. Truhlar, J.Chem.Theory Comput. 2, 364-382 (2006);  |       |       |       |       |       |       |       |       |       |       |       |       |  |
|                 |                    | Y. Zhao, N.E. Schultz, and D.G. Truhlar, J.Chem.Phys. 123, 161103 (2005);            |       |       |       |       |       |       |       |       |       |       |       |       |  |
|                 |                    | Y. Zhao and D.G. Truhlar, J.Phys.Chem.A 109, 5656-5667 (2005);                       |       |       |       |       |       |       |       |       |       |       |       |       |  |
|                 |                    | B.J. Lynch, Y. Zhao, and D.G. Truhlar, J.Phys.Chem.A 107, 1384-1388 (2003);          |       |       |       |       |       |       |       |       |       |       |       |       |  |
|                 |                    | R. Peverati and D.G. Truhlar, Phys.Chem.Chem.Phys. 14, 13171-13174 (2012);           |       |       |       |       |       |       |       |       |       |       |       |       |  |
|                 |                    | R. Li, R. Peverati, M. Isegawa, and D.G. Truhlar, J.Phys.Chem.A 117, 169-173 (2012). |       |       |       |       |       |       |       |       |       |       |       |       |  |
|                 |                    | EA13/03                                                                              |       |       |       |       |       |       |       |       |       |       |       |       |  |
| C               | 29.2 <sup>a</sup>  | 5.9                                                                                  | 15.3  | 39.1  | -1.9  | -14.6 | -4.3  | 18.3  | 18.3  | 18.3  | 18.3  | 15.1  | 15.1  | 15.1  |  |
| O               | 33.8 <sup>a</sup>  | 2.0                                                                                  | 12.7  | 22.7  | 20.4  | 22.8  | -2.6  | 28.1  | 28.1  | 28.1  | 27.6  | 27.6  | 27.6  | 27.6  |  |
| O2              | 10.8 <sup>a</sup>  | -12.7                                                                                | -12.5 | 6.3   | -8.2  | -4.8  | -9.5  | 20.6  | 20.6  | 20.6  | 18.5  | 18.5  | 18.5  | 18.5  |  |
| OH              | 42.3 <sup>a</sup>  | 6.6                                                                                  | 15.1  | 20.8  | 45.5  | 39.8  | 7.8   | 29.4  | 29.4  | 29.4  | 33.6  | 33.6  | 33.6  | 33.6  |  |
|                 |                    | a Y. Zhao, N.E. Schultz, and D.G. Truhlar, J.Chem.Theory Comput. 2, 364-382 (2006);  |       |       |       |       |       |       |       |       |       |       |       |       |  |
|                 |                    | Y. Zhao, N.E. Schultz, and D.G. Truhlar, J.Chem.Phys. 123, 161103 (2005);            |       |       |       |       |       |       |       |       |       |       |       |       |  |
|                 |                    | Y. Zhao and D.G. Truhlar, J.Phys.Chem.A 109, 5656-5667 (2005);                       |       |       |       |       |       |       |       |       |       |       |       |       |  |
|                 |                    | B.J. Lynch, Y. Zhao, and D.G. Truhlar, J.Phys.Chem.A 107, 1384-1388 (2003);          |       |       |       |       |       |       |       |       |       |       |       |       |  |
|                 |                    | R. Peverati and D.G. Truhlar, Phys.Chem.Chem.Phys. 14, 13171-13174 (2012);           |       |       |       |       |       |       |       |       |       |       |       |       |  |
|                 |                    | R. Li, R. Peverati, M. Isegawa, and D.G. Truhlar, J.Phys.Chem.A 117, 169-173 (2012). |       |       |       |       |       |       |       |       |       |       |       |       |  |
|                 |                    | PA8/06                                                                               |       |       |       |       |       |       |       |       |       |       |       |       |  |
| C2H3+           | 156.6 <sup>a</sup> | 129.9                                                                                | 135.1 | 131.8 | 127.7 | 127.5 | 146.1 | 133.3 | 133.5 | 133.5 | 133.3 | 133.6 | 133.7 | 133.7 |  |
| H3+             | 105.9 <sup>a</sup> | 110.0                                                                                | 139.4 | 139.2 | 175.3 | 182.8 | 108.8 | 42.8  | 42.8  | 42.9  | 65.1  | 65.1  | 65.3  | 65.3  |  |
| H3O+            | 171.8 <sup>a</sup> | 171.5                                                                                | 163.8 | 154.5 | 169.4 | 160.9 | 175.6 | 167.7 | 167.8 | 167.9 | 165.9 | 166.0 | 166.2 | 166.2 |  |
| NH4+            | 211.9 <sup>a</sup> | 196.4                                                                                | 209.9 | 209.2 | 212.3 | 208.9 | 214.0 | 221.5 | 221.7 | 221.8 | 213.5 | 213.6 | 213.9 | 213.9 |  |
|                 |                    | a Y. Zhao and D.G. Truhlar, J.Phys.Chem.A 110, 10478-10486 (2006).                   |       |       |       |       |       |       |       |       |       |       |       |       |  |
|                 |                    | ABDE12 (ZPVE-exclusive, 0 K)                                                         |       |       |       |       |       |       |       |       |       |       |       |       |  |
| C2H6            | 97.4 <sup>a</sup>  | 77.4                                                                                 | 85.0  | 85.2  | 80.4  | 83.0  | 102.6 | 96.3  | 97.2  | 97.1  | 100.2 | 100.7 | 101.5 | 101.5 |  |
| C2H6O           | 89.8 <sup>a</sup>  | 78.5                                                                                 | 85.4  | 77.5  | 84.0  | 79.2  | 89.9  | 85.5  | 86.7  | 86.4  | 85.0  | 86.1  | 86.4  | 86.4  |  |
| Et-CH3          | 95.9 <sup>a</sup>  | 69.2                                                                                 | 79.0  | 77.7  | 73.9  | 76.0  | 95.4  | 91.2  | 92.8  | 92.5  | 93.1  | 94.4  | 94.9  | 94.9  |  |
| Et-H            | 108.9 <sup>a</sup> | 92.1                                                                                 | 94.7  | 95.7  | 92.2  | 94.5  | 106.0 | 106.2 | 106.6 | 106.5 | 105.4 | 105.7 | 105.9 | 105.9 |  |
| EtOCH3          | 95.3 <sup>a</sup>  | 70.3                                                                                 | 78.3  | 69.6  | 78.4  | 74.1  | 86.1  | 83.4  | 85.0  | 84.6  | 80.6  | 82.2  | 82.4  | 82.4  |  |
| EtOH            | 100.3 <sup>a</sup> | 81.7                                                                                 | 88.1  | 83.2  | 90.8  | 85.5  | 95.0  | 91.2  | 92.1  | 91.9  | 90.4  | 91.2  | 91.5  | 91.5  |  |
| iPr-CH3 C4H10   | 95.0 <sup>a</sup>  | 60.3                                                                                 | 73.9  | 71.9  | 68.8  | 70.4  | 89.4  | 86.9  | 89.2  | 88.6  | 87.3  | 89.5  | 89.8  | 89.8  |  |
| iPr-OCH3 C4H10O | 91.5 <sup>a</sup>  | 60.0                                                                                 | 71.7  | 63.5  | 75.7  | 70.9  | 81.3  | 80.7  | 83.1  | 82.4  | 76.9  | 79.4  | 79.3  | 79.3  |  |
| tBu-CH3         | 93.7 <sup>a</sup>  | 49.5                                                                                 | 70.2  | 69.5  | 65.8  | 67.0  | 82.8  | 83.7  | 86.8  | 85.8  | 82.6  | 85.7  | 85.8  | 85.7  |  |
| tBu-H           | 103.9 <sup>a</sup> | 80.0                                                                                 | 89.4  | 85.9  | 82.3  | 84.6  | 97.5  | 94.3  | 95.3  | 94.9  | 92.7  | 93.7  | 93.6  | 93.6  |  |
| tBu-OCH3        | 89.3 <sup>a</sup>  | 47.2                                                                                 | 65.9  | 59.3  | 74.1  | 68.6  | 75.6  | 78.8  | 81.4  | 80.5  | 73.9  | 77.4  | 77.2  | 77.1  |  |
|                 |                    | ... continued on next page ...                                                       |       |       |       |       |       |       |       |       |       |       |       |       |  |



Table S21: ... continued from previous page ...

| Species                                                                             | Ref.                | MNDO  | AMI   | PM3   | PM6   | PM7   | OM1   |       | OM2   |       | OM3   |       | OM3   |       |       |
|-------------------------------------------------------------------------------------|---------------------|-------|-------|-------|-------|-------|-------|-------|-------|-------|-------|-------|-------|-------|-------|
|                                                                                     |                     |       |       |       |       |       | D2    | D3    | D2    | D3    | D2    | D3    | D2    | D3    |       |
| tBu-OH                                                                              | 1.15.0 <sup>a</sup> | 62.3  | 79.2  | 77.2  | 88.7  | 83.0  | 86.7  | 89.9  | 91.8  | 91.2  | 91.2  | 87.0  | 88.9  | 88.9  |       |
| a Y. Zhao, N.E. Schultz, and D.G. Truhlar, J.Chem.Theory Comput. 2, 364-382 (2006); |                     |       |       |       |       |       |       |       |       |       |       |       |       |       |       |
| Y. Zhao and D.G. Truhlar, J.Chem.Phys. 125, 194101 (2006);                          |                     |       |       |       |       |       |       |       |       |       |       |       |       |       |       |
| E.I. Izgorodina, M.L. Coote, and L.J. Radom, J.Phys.Chem.A 109, 7558-7566 (2005);   |                     |       |       |       |       |       |       |       |       |       |       |       |       |       |       |
| R. Peverati, Y. Zhao, and D.G. Truhlar, J.Phys.Chem.Lett. 2, 1991-1997 (2011).      |                     |       |       |       |       |       |       |       |       |       |       |       |       |       |       |
| HC7/11                                                                              |                     |       |       |       |       |       |       |       |       |       |       |       |       |       |       |
| E1                                                                                  | 14.3 <sup>a</sup>   | 2.4   | -6.6  | 7.1   | 5.3   | -4.3  | 13.8  | 22.3  | 24.6  | 22.3  | 22.3  | 20.6  | 20.9  | 21.0  | 20.9  |
| E1                                                                                  | 25.0 <sup>a</sup>   | 17.1  | 8.0   | 22.5  | 19.7  | 6.4   | 25.4  | 36.1  | 39.5  | 36.6  | 36.6  | 34.6  | 35.5  | 35.7  | 35.7  |
| (CH <sub>3</sub> ) <sub>3</sub> CC(CH <sub>3</sub> ) <sub>3</sub> octane-a          | 1.9 <sup>a</sup>    | -39.2 | -16.8 | -4.1  | 0.2   | -0.5  | -18.3 | 7.8   | 12.4  | 10.9  | 10.8  | 0.2   | 5.5   | 4.6   | 4.5   |
| hexane                                                                              | 9.8 <sup>a</sup>    | -12.3 | -5.9  | 1.3   | 5.4   | 4.1   | -3.5  | 10.8  | 12.6  | 12.2  | 12.2  | 8.6   | 10.9  | 10.5  | 10.5  |
| octane-b                                                                            | 14.8 <sup>a</sup>   | -18.5 | -9.0  | 1.9   | 8.1   | 6.2   | -5.3  | 16.2  | 19.0  | 18.4  | 18.4  | 13.0  | 16.4  | 15.9  | 15.9  |
| adamantane                                                                          | 194.0 <sup>a</sup>  | 186.4 | 201.3 | 188.2 | 196.2 | 187.6 | 172.0 | 175.3 | 189.9 | 185.9 | 185.8 | 178.2 | 189.9 | 193.7 | 193.5 |
| bicycoct                                                                            | 127.2 <sup>a</sup>  | 125.4 | 137.3 | 128.2 | 129.8 | 123.4 | 114.2 | 112.5 | 122.4 | 119.8 | 119.7 | 116.3 | 124.3 | 127.0 | 126.9 |
| a R. Peverati, Y. Zhao, and D.G. Truhlar, J.Phys.Chem.Lett. 2, 1991-1997 (2011).    |                     |       |       |       |       |       |       |       |       |       |       |       |       |       |       |
| πTC13                                                                               |                     |       |       |       |       |       |       |       |       |       |       |       |       |       |       |
| pie2                                                                                | -1.4 <sup>a</sup>   | -1.4  | -1.0  | -5.8  | 8.4   | 9.6   | -0.0  | -0.5  | -0.5  | -0.4  | -0.4  | -0.6  | -0.7  | -0.6  | -0.6  |
| pie4                                                                                | -8.8 <sup>a</sup>   | -10.3 | -8.9  | -15.9 | 12.3  | 14.0  | -8.5  | -8.4  | -8.5  | -8.4  | -8.4  | -8.8  | -8.8  | -8.7  | -8.7  |
| pie6                                                                                | -14.3 <sup>a</sup>  | -18.7 | -16.5 | -24.9 | -7.3  | -5.4  | -16.1 | -15.6 | -15.7 | -15.6 | -15.6 | -16.1 | -16.1 | -16.0 | -16.0 |
| P-10H                                                                               | 225.9 <sup>a</sup>  | 213.1 | 215.4 | 212.9 | 214.9 | 213.7 | 228.3 | 227.9 | 228.4 | 228.3 | 228.3 | 221.3 | 221.7 | 221.8 | 221.8 |
| P-2H                                                                                | 167.8 <sup>a</sup>  | 142.2 | 150.9 | 147.3 | 144.1 | 141.8 | 156.0 | 151.7 | 152.0 | 151.9 | 151.9 | 148.4 | 148.9 | 148.8 | 148.8 |
| P-4H                                                                                | 193.4 <sup>a</sup>  | 186.7 | 189.1 | 185.6 | 188.8 | 187.7 | 196.3 | 197.1 | 197.5 | 197.4 | 197.4 | 191.1 | 191.4 | 191.6 | 191.6 |
| P-6H                                                                                | 209.7 <sup>a</sup>  | 199.9 | 202.0 | 199.0 | 201.6 | 200.4 | 212.1 | 212.4 | 212.8 | 212.7 | 212.7 | 206.0 | 206.4 | 206.6 | 206.6 |
| P-8H                                                                                | 219.7 <sup>a</sup>  | 207.8 | 210.0 | 207.3 | 209.5 | 208.4 | 221.7 | 221.7 | 222.1 | 222.0 | 222.0 | 215.1 | 215.5 | 215.7 | 215.7 |
| SB-10H                                                                              | 241.0 <sup>a</sup>  | 221.8 | 234.2 | 225.1 | 235.2 | 234.0 | 238.7 | 241.8 | 242.2 | 242.2 | 242.2 | 234.3 | 234.7 | 234.9 | 234.9 |
| SB-2H                                                                               | 214.5 <sup>a</sup>  | 199.2 | 209.6 | 202.7 | 210.9 | 209.5 | 211.7 | 213.7 | 214.0 | 214.0 | 214.0 | 208.6 | 208.8 | 209.0 | 209.0 |
| SB-4H                                                                               | 226.2 <sup>a</sup>  | 210.1 | 221.7 | 213.7 | 221.9 | 220.7 | 224.1 | 227.1 | 227.5 | 227.5 | 227.5 | 221.1 | 221.4 | 221.6 | 221.6 |
| SB-6H                                                                               | 233.4 <sup>a</sup>  | 216.0 | 227.9 | 219.3 | 228.4 | 227.3 | 231.2 | 234.3 | 234.7 | 234.7 | 234.7 | 227.6 | 227.9 | 228.1 | 228.1 |
| SB-8H                                                                               | 238.2 <sup>a</sup>  | 219.6 | 231.7 | 222.8 | 232.5 | 231.4 | 235.7 | 238.8 | 239.2 | 239.2 | 239.2 | 231.6 | 232.0 | 232.2 | 232.2 |
| a Y. Zhao, N.E. Schultz, and D.G. Truhlar, J.Chem.Phys. 123, 161103 (2005);         |                     |       |       |       |       |       |       |       |       |       |       |       |       |       |       |
| Y. Zhao and D.G. Truhlar, J.Phys.Chem.A 110, 10478-10486 (2006);                    |                     |       |       |       |       |       |       |       |       |       |       |       |       |       |       |
| Y. Zhao, and D.G. Truhlar, J.Chem.Phys. 125, 194101 (2006).                         |                     |       |       |       |       |       |       |       |       |       |       |       |       |       |       |
| HTBH38/08                                                                           |                     |       |       |       |       |       |       |       |       |       |       |       |       |       |       |
| TS C2H5 + NH2                                                                       | 7.5 <sup>a</sup>    | 40.9  | 26.3  | 22.4  | 24.8  | 26.4  | 22.4  | 11.1  | 10.0  | 10.1  | 10.1  | 6.7   | 5.6   | 5.4   | 5.4   |
| TS C2H5 + NH2                                                                       | 18.3 <sup>a</sup>   | 33.5  | 21.9  | 20.0  | 19.8  | 23.6  | 29.6  | 19.8  | 19.1  | 19.0  | 19.0  | 12.5  | 11.8  | 11.5  | 11.5  |
| TS CH3 + H2                                                                         | 12.1 <sup>a</sup>   | 28.2  | 18.1  | 15.2  | 23.1  | 25.8  | 9.0   | 5.2   | 4.8   | 4.7   | 4.7   | 0.7   | 0.2   | -0.1  | -0.1  |
| TS CH3 + H2                                                                         | 15.3 <sup>a</sup>   | 16.2  | 1.5   | -6.7  | -13.3 | -14.9 | 10.1  | 4.2   | 3.9   | 3.8   | 3.8   | 2.1   | 1.7   | 1.5   | 1.5   |
| TS CH3 + NH2                                                                        | 8.0 <sup>a</sup>    | 35.7  | 22.4  | 17.6  | 20.0  | 21.7  | 19.0  | 7.8   | 7.1   | 7.2   | 7.2   | 2.9   | 2.1   | 1.9   | 1.9   |
| TS CH3 + NH2                                                                        | 22.4 <sup>a</sup>   | 33.1  | 21.9  | 22.2  | 22.5  | 26.1  | 31.4  | 23.6  | 23.0  | 22.9  | 22.9  | 16.6  | 15.8  | 15.7  | 15.7  |
| TS F + H2                                                                           | 1.4 <sup>a</sup>    | 25.1  | 12.4  | 2.1   | 1.1   | 11.4  | 10.0  | 4.8   | 4.6   | 4.6   | 4.6   | 7.0   | 6.9   | 6.8   | 6.8   |
| TS F + H2                                                                           | 33.4 <sup>a</sup>   | 53.0  | 44.7  | 18.5  | 4.3   | 8.1   | 47.7  | 31.0  | 30.9  | 30.9  | 30.9  | 38.2  | 38.1  | 38.0  | 38.0  |
| TS H + HO                                                                           | 10.5 <sup>a</sup>   | 37.6  | 16.6  | 9.3   | -18.0 | -16.7 | 22.1  | 1.2   | 1.1   | 1.0   | 1.0   | -0.1  | -0.2  | -0.5  | -0.5  |
| TS H + HO                                                                           | 12.9 <sup>a</sup>   | 28.4  | 13.9  | 18.0  | 14.4  | 15.5  | 16.2  | 1.4   | 1.3   | 1.2   | 1.2   | -2.6  | -2.6  | -2.9  | -2.9  |
| TS H + H2                                                                           | 9.6 <sup>a</sup>    | 14.1  | 4.4   | -8.0  | -8.2  | -8.2  | 0.9   | 1.3   | 1.2   | 1.0   | 1.0   | -5.1  | -5.2  | -5.6  | -5.6  |
| TS NH2 + CH4                                                                        | 14.5 <sup>a</sup>   | 35.3  | 21.5  | 23.6  | 19.2  | 23.2  | 28.4  | 18.2  | 17.4  | 17.5  | 17.5  | 12.9  | 12.0  | 11.8  | 11.8  |

... continued on next page ...

Table S21: ... continued from previous page ...

| Species               | Ref.              | MNDO | AMI  | PM3  | PM6  | PM7   | OM1  |      | OM2  |      | OM3  |      | OM3  |      |
|-----------------------|-------------------|------|------|------|------|-------|------|------|------|------|------|------|------|------|
|                       |                   |      |      |      |      |       | D2   | D3   | D2   | D3   | D2   | D3   | D2   | D3   |
| TS NH2 + CH4          | 17.8 <sup>a</sup> | 41.8 | 28.7 | 20.9 | 26.1 | 27.4  | 23.4 | 18.3 | 17.5 | 17.6 | 17.6 | 10.0 | 9.1  | 8.9  |
| TS NH2 + C2H6         | 10.4 <sup>a</sup> | 34.9 | 20.9 | 21.2 | 16.9 | 20.7  | 26.5 | 14.7 | 13.8 | 13.9 | 13.9 | 9.5  | 8.5  | 8.2  |
| TS NH2 + C2H6         | 17.4 <sup>a</sup> | 46.3 | 31.9 | 25.5 | 31.3 | 32.2  | 26.7 | 21.9 | 20.7 | 20.9 | 20.9 | 14.4 | 13.1 | 13.0 |
| TS O + CH4            | 13.5 <sup>a</sup> | 28.6 | 10.4 | 12.3 | 13.0 | 12.2  | 18.3 | 2.5  | 2.2  | 2.2  | 2.2  | 2.4  | 2.0  | 1.9  |
| TS O + CH4            | 7.9 <sup>a</sup>  | 49.8 | 29.8 | 25.5 | 17.1 | 20.8  | 23.0 | 3.4  | 2.9  | 2.9  | 2.9  | 3.4  | 2.9  | 2.7  |
| TS OH + H2            | 4.9 <sup>a</sup>  | 34.3 | 15.7 | 17.0 | 0.1  | 5.0   | 20.8 | 5.2  | 5.0  | 4.9  | 4.9  | 2.7  | 2.4  | 2.2  |
| TS OH + H2            | 21.2 <sup>a</sup> | 46.9 | 20.3 | 9.1  | -8.9 | -13.2 | 32.2 | 12.6 | 12.4 | 12.4 | 12.4 | 12.2 | 12.0 | 11.9 |
| TS OH + NH3           | 3.0 <sup>a</sup>  | 43.3 | 26.4 | 19.2 | 2.2  | 6.0   | 21.7 | 8.9  | 8.4  | 8.4  | 8.4  | 4.3  | 3.7  | 3.5  |
| TS OH + NH3           | 12.7 <sup>a</sup> | 61.4 | 40.5 | 35.8 | 22.8 | 24.4  | 36.8 | 17.3 | 16.7 | 16.7 | 16.7 | 15.3 | 14.7 | 14.5 |
| TS OH + CH4           | 6.5 <sup>a</sup>  | 34.5 | 14.3 | 14.6 | 1.4  | 5.7   | 19.1 | 2.9  | 2.3  | 2.3  | 2.3  | 3.7  | 3.2  | 3.0  |
| TS OH + CH4           | 19.6 <sup>a</sup> | 59.1 | 35.6 | 28.6 | 28.9 | 28.3  | 29.3 | 11.3 | 10.6 | 10.7 | 10.7 | 11.9 | 11.3 | 11.0 |
| TS OH + C2H6          | 3.2 <sup>a</sup>  | 35.3 | 15.1 | 13.4 | -0.6 | 4.0   | 18.8 | 0.7  | 0.1  | 0.1  | 0.1  | 1.9  | 1.3  | 1.0  |
| TS OH + C2H6          | 19.9 <sup>a</sup> | 64.8 | 40.2 | 34.3 | 34.4 | 33.8  | 34.2 | 16.2 | 15.2 | 15.4 | 15.4 | 17.9 | 16.9 | 16.7 |
| TS s-t-C5H8 -> c-C5H8 | 38.4 <sup>a</sup> | 59.4 | 40.6 | 36.9 | 42.3 | 44.9  | 44.3 | 34.7 | 34.0 | 34.2 | 34.2 | 33.8 | 33.5 | 33.0 |

a Y. Zhao, N.E. Schultz, and D.G. Truhlar, *J.Chem.Theory Comput.* **2**, 364-382 (2006) ;  
Y. Zhao, B.J. Lynch, and D.G. Truhlar, *Phys.Chem.Chem.Phys.* **7**, 43-52 (2005) ;  
Y. Zhao, N. González-García, and D.G. Truhlar, *J.Phys.Chem.A* **109**, 2012-2018 (2005) ;  
J. Zheng, Y. Zhao, and D.G. Truhlar, *J.Chem.Theory Comput.* **5**, 808-821 (2009).

---

| NHTBH38/08/08 |                    |       |      |      |       |      |       |      |      |      |      |       |       |       |
|---------------|--------------------|-------|------|------|-------|------|-------|------|------|------|------|-------|-------|-------|
| TS CH3 + C2H4 | 6.8 <sup>a</sup>   | 22.5  | 10.9 | 11.7 | 12.3  | 9.3  | 11.8  | 10.5 | 9.2  | 9.3  | 9.3  | 10.3  | 9.0   | 8.6   |
| TS CH3 + C2H4 | 33.0 <sup>a</sup>  | 55.4  | 44.4 | 44.4 | 42.8  | 38.0 | 39.7  | 35.0 | 35.1 | 34.9 | 34.9 | 37.7  | 37.4  | 37.6  |
| TS F- + CH3F  | -0.3 <sup>a</sup>  | 46.4  | 32.6 | 39.9 | 13.8  | 24.5 | 9.0   | 13.7 | 13.2 | 13.4 | 13.4 | 18.0  | 17.5  | 17.5  |
| TS F- + CH3F  | 13.4 <sup>a</sup>  | 45.7  | 41.3 | 45.5 | 21.0  | 32.1 | 20.5  | 22.5 | 22.6 | 22.5 | 22.5 | 26.1  | 26.3  | 26.1  |
| TS H + N2     | 14.4 <sup>a</sup>  | 11.9  | 5.7  | 3.4  | -4.0  | -2.0 | 14.3  | 2.5  | 2.3  | 2.2  | 2.2  | -7.0  | -7.4  | -7.4  |
| TS H + N2     | 10.6 <sup>a</sup>  | 23.9  | 22.7 | 22.8 | 25.1  | 24.7 | 17.1  | 9.5  | 9.5  | 9.4  | 9.4  | 13.4  | 13.3  | 13.2  |
| TS H + CO     | 3.2 <sup>a</sup>   | 3.9   | 0.1  | -0.4 | 7.5   | 7.3  | 4.6   | -1.8 | -1.9 | -2.1 | -2.1 | -0.8  | -0.9  | -1.3  |
| TS H + CO     | 22.7 <sup>a</sup>  | 48.0  | 46.6 | 39.5 | 45.5  | 40.0 | 31.9  | 31.5 | 31.5 | 31.4 | 31.4 | 36.0  | 35.9  | 35.7  |
| TS H + F2     | 2.3 <sup>a</sup>   | 26.8  | 3.1  | 7.1  | 13.2  | 19.3 | 9.9   | 3.6  | 3.5  | 3.5  | 3.5  | 6.6   | 6.5   | 6.3   |
| TS H + F2     | 105.8 <sup>a</sup> | 139.5 | 83.7 | 82.2 | 109.0 | 98.7 | 124.4 | 99.9 | 99.8 | 99.7 | 99.7 | 106.6 | 106.6 | 106.4 |
| TS H + FH     | 42.2 <sup>a</sup>  | 26.6  | 34.7 | 21.5 | 16.6  | 36.9 | 24.6  | -1.2 | -1.3 | -1.4 | -1.4 | 1.7   | 1.5   | 1.5   |
| TS H + N2O    | 17.1 <sup>a</sup>  | 13.2  | 6.0  | 17.0 | -5.4  | -2.9 | 11.1  | -1.3 | -1.5 | -1.7 | -1.7 | -4.3  | -4.4  | -4.8  |
| TS H + N2O    | 82.3 <sup>a</sup>  | 86.9  | 74.4 | 73.5 | 19.1  | 35.6 | 84.0  | 68.5 | 68.2 | 67.9 | 67.9 | 68.8  | 68.6  | 67.9  |
| TS H + C2H4   | 1.7 <sup>a</sup>   | 10.8  | 4.9  | 6.5  | 11.9  | 11.5 | 8.9   | 4.2  | 3.8  | 3.7  | 3.7  | 4.8   | 4.3   | 4.0   |
| TS H + C2H4   | 41.8 <sup>a</sup>  | 65.2  | 54.1 | 57.5 | 62.2  | 60.2 | 47.3  | 43.5 | 43.5 | 43.3 | 43.3 | 45.6  | 45.4  | 45.3  |
| TS H + FCH3   | 30.4 <sup>a</sup>  | 42.7  | 30.3 | 28.8 | 16.9  | 30.6 | 17.9  | 10.1 | 9.9  | 9.9  | 9.9  | 14.5  | 14.1  | 14.2  |
| TS H + FCH3   | 57.0 <sup>a</sup>  | 68.2  | 60.5 | 60.3 | 48.6  | 66.8 | 47.3  | 30.1 | 29.6 | 29.7 | 29.7 | 39.5  | 39.0  | 38.9  |
| TS HCN        | 48.1 <sup>a</sup>  | 97.6  | 89.0 | 75.1 | 90.4  | 91.0 | 76.4  | 89.8 | 89.9 | 89.8 | 89.8 | 76.9  | 77.0  | 76.9  |
| TS HCN        | 32.8 <sup>a</sup>  | 64.6  | 70.8 | 51.2 | 77.1  | 81.8 | 67.2  | 72.1 | 72.2 | 72.2 | 72.2 | 75.1  | 75.1  | 75.1  |
| TS OH- + CH3F | -2.4 <sup>a</sup>  | 43.2  | 31.1 | 28.5 | -4.5  | 2.4  | 3.0   | 11.4 | 10.7 | 10.8 | 10.8 | 11.7  | 10.9  | 10.8  |
| TS OH- + CH3F | 17.7 <sup>a</sup>  | 51.7  | 9.8  | 40.6 | 20.4  | 28.5 | 26.0  | 26.6 | 26.1 | 26.2 | 26.2 | 31.1  | 30.5  | 30.5  |
| TS OH- + CH3F | 11.0 <sup>a</sup>  | 43.8  | 40.1 | 33.9 | 7.0   | 14.3 | 13.7  | 20.7 | 20.5 | 20.6 | 20.6 | 20.8  | 20.5  | 20.5  |
| TS OH- + CH3F | 47.2 <sup>a</sup>  | 65.4  | 40.7 | 69.5 | 39.5  | 38.1 | 56.7  | 57.2 | 57.1 | 57.2 | 57.2 | 63.4  | 63.2  | 63.4  |

a Y. Zhao, N.E. Schultz, and D.G. Truhlar, *J.Chem.Theory Comput.* **2**, 364-382 (2006) ;  
Y. Zhao, B.J. Lynch, and D.G. Truhlar, *Phys.Chem.Chem.Phys.* **7**, 43-52 (2005) ;  
Y. Zhao, N. González-García, and D.G. Truhlar, *J.Phys.Chem.A* **109**, 2012-2018 (2005) ;  
... continued on next page ...

Table S21: . . . continued from previous page . . .

| Species                                                                                                                                 | Ref.              | MNDO  | AMI  | PM3  | PM6  | PM7  | OM2  |      | OM3  |      | D3T  | D3   | D3T  |      |
|-----------------------------------------------------------------------------------------------------------------------------------------|-------------------|-------|------|------|------|------|------|------|------|------|------|------|------|------|
|                                                                                                                                         |                   |       |      |      |      |      | D2   | D3   | D2   | D3   |      |      |      |      |
| J. Zheng, Y. Zhao, and D.G. Truhlar, J.Chem.Theory Comput. 5, 808-821 (2009).                                                           |                   |       |      |      |      |      |      |      |      |      |      |      |      |      |
| NCC/E31/05 <sup>a</sup>                                                                                                                 |                   |       |      |      |      |      |      |      |      |      |      |      |      |      |
| C2H2-C2H2                                                                                                                               | 1.3 <sup>a</sup>  | -1.4  | -0.0 | 0.2  | 0.3  | 0.7  | 0.3  | 1.0  | 1.4  | 1.5  | 1.5  | 0.6  | 1.2  | 1.3  |
| C2H4-C2H4                                                                                                                               | 1.4 <sup>a</sup>  | -4.0  | 0.1  | 1.1  | 0.4  | 1.0  | -0.4 | 0.4  | 1.4  | 1.5  | 1.5  | -0.1 | 1.1  | 1.3  |
| C2H4-F2                                                                                                                                 | 1.1 <sup>a</sup>  | -4.1  | -0.9 | -1.2 | 0.0  | 0.4  | -0.4 | -0.3 | 0.1  | -0.0 | -0.0 | -0.6 | -0.0 | -0.1 |
| CH4-CH4                                                                                                                                 | 0.5 <sup>a</sup>  | -1.6  | -0.2 | 0.3  | 0.1  | 0.3  | -0.1 | -0.1 | 0.4  | 0.5  | 0.5  | -0.2 | 0.4  | 0.5  |
| H2O-H2O                                                                                                                                 | 5.0 <sup>a</sup>  | -6.2  | 2.9  | 2.6  | 4.0  | 4.9  | 2.7  | 4.0  | 4.3  | 4.3  | 4.3  | 4.4  | 4.8  | 4.9  |
| HCONH2-HCONH2                                                                                                                           | 14.9 <sup>a</sup> | -17.1 | 5.9  | 5.5  | 10.2 | 14.3 | 6.1  | 11.9 | 13.2 | 13.3 | 13.3 | 10.7 | 12.2 | 12.5 |
| HCOOH-HCOOH                                                                                                                             | 16.1 <sup>a</sup> | -23.6 | -1.0 | 8.3  | 9.8  | 17.4 | 3.1  | 12.6 | 13.8 | 13.8 | 13.8 | 11.0 | 12.3 | 12.7 |
| HF-HF                                                                                                                                   | 4.6 <sup>a</sup>  | -5.2  | 1.8  | 4.8  | -2.7 | -5.4 | -0.4 | 1.6  | 1.9  | 1.8  | 1.8  | -0.1 | 0.3  | 0.2  |
| NH3-NH3                                                                                                                                 | 3.1 <sup>a</sup>  | -3.3  | 0.5  | -0.2 | 2.3  | 5.4  | 1.6  | 2.0  | 2.4  | 2.5  | 2.5  | 2.3  | 2.9  | 2.9  |
| NH3-H2O                                                                                                                                 | 6.4 <sup>a</sup>  | -5.8  | 0.8  | 2.1  | 4.0  | 6.5  | 2.5  | 4.5  | 4.9  | 5.0  | 5.0  | 5.7  | 6.3  | 6.4  |
| P-C6H6-C6H6                                                                                                                             | 2.8 <sup>a</sup>  | -5.1  | -3.0 | -1.6 | -0.7 | 4.2  | 0.5  | -1.7 | 0.4  | 1.4  | 1.2  | -2.2 | 0.4  | 1.4  |
| S-C6H6-C6H6                                                                                                                             | 1.8 <sup>a</sup>  | -3.7  | -2.5 | -1.2 | -1.0 | 4.5  | 0.4  | -2.1 | -0.4 | 0.6  | 0.4  | -2.4 | -0.3 | 0.6  |
| T-C6H6-C6H6                                                                                                                             | 2.7 <sup>a</sup>  | -5.9  | -1.3 | 0.1  | 0.1  | 3.0  | 0.6  | 0.2  | 1.7  | 2.2  | 2.1  | -1.2 | 0.7  | 1.2  |
| a Y. Zhao and D.G. Truhlar, J.Phys.Chem.A 109, 5656-5667 (2005) ;<br>Y. Zhao and D.G. Truhlar, J.Chem.Theory Comput. 1, 415-432 (2005). |                   |       |      |      |      |      |      |      |      |      |      |      |      |      |

Notes: SCF calculations of the CCH· and CH<sub>3</sub>CO· radicals during thermochemical calculations (for correcting the MGA/E109 subset energies) could not be converged with many methods with tight SCF convergence criteria, thus criteria for both energy and density matrix were reduced to 10<sup>-7</sup>.

Table S22: Benchmark Results for the PDDG Data Set. Heats of Formation (kcal/mol)

| Molecule | Ref.               | MNDO  | AM1   | PM3   | PM6   | PM7   | OM1   |       | OM2   |       | OM3   |       | OM3   |       | D3T   |
|----------|--------------------|-------|-------|-------|-------|-------|-------|-------|-------|-------|-------|-------|-------|-------|-------|
|          |                    |       |       |       |       |       | D2    | D3    | D2    | D3    | D2    | D3    | D2    | D3    |       |
| #01      | 0.0 <sup>a</sup>   | 0.7   | -5.2  | -13.4 | -25.7 | -32.0 | 2.6   | -3.4  | -3.5  | -3.5  | -0.0  | -0.0  | -0.1  | -0.1  | -0.1  |
| #02      | -17.9 <sup>b</sup> | -11.9 | -8.8  | -13.0 | -12.3 | -14.4 | -13.8 | -19.3 | -19.8 | -19.9 | -18.0 | -18.4 | -19.1 | -19.1 | -19.1 |
| #03      | -20.0 <sup>c</sup> | -19.7 | -17.4 | -18.1 | -15.8 | -18.2 | -20.3 | -21.2 | -22.8 | -23.0 | -20.8 | -21.9 | -23.6 | -23.6 | -23.6 |
| #04      | -25.0 <sup>c</sup> | -24.9 | -24.3 | -23.6 | -21.0 | -23.1 | -25.2 | -25.5 | -28.7 | -28.7 | -25.4 | -27.9 | -30.4 | -30.4 | -30.4 |
| #05      | -30.0 <sup>c</sup> | -29.7 | -31.1 | -29.1 | -26.0 | -28.2 | -30.4 | -30.1 | -34.9 | -34.8 | -30.3 | -34.1 | -37.5 | -37.5 | -37.5 |
| #06      | -35.1 <sup>c</sup> | -34.4 | -38.0 | -34.5 | -31.0 | -33.3 | -35.5 | -34.7 | -41.1 | -40.8 | -35.2 | -40.3 | -44.6 | -44.6 | -44.6 |
| #07      | -40.0 <sup>c</sup> | -39.1 | -44.8 | -39.9 | -36.0 | -38.4 | -40.7 | -39.2 | -47.3 | -46.9 | -40.0 | -46.5 | -51.6 | -51.6 | -51.6 |
| #08      | -44.9 <sup>c</sup> | -43.8 | -51.7 | -45.3 | -41.0 | -43.5 | -45.8 | -43.8 | -53.6 | -53.0 | -44.8 | -52.8 | -58.7 | -58.7 | -58.7 |
| #09      | -49.8 <sup>c</sup> | -48.5 | -58.5 | -50.7 | -46.0 | -48.6 | -51.0 | -48.3 | -59.8 | -59.0 | -49.7 | -59.0 | -65.8 | -65.8 | -65.8 |
| #10      | -54.8 <sup>c</sup> | -53.3 | -65.4 | -56.2 | -51.0 | -53.7 | -56.1 | -52.9 | -66.0 | -65.1 | -54.5 | -65.2 | -72.9 | -72.9 | -72.9 |
| #11      | -59.6 <sup>b</sup> | -58.0 | -72.2 | -61.6 | -56.0 | -58.8 | -61.3 | -57.5 | -72.2 | -71.2 | -59.3 | -71.4 | -79.9 | -79.9 | -79.9 |
| #12      | -32.1 <sup>c</sup> | -26.8 | -29.4 | -29.5 | -27.5 | -28.9 | -28.3 | -31.8 | -37.0 | -36.7 | -31.3 | -35.5 | -38.8 | -38.8 | -38.8 |
| #13      | -40.1 <sup>c</sup> | -24.6 | -32.8 | -35.8 | -35.0 | -35.5 | -29.3 | -39.6 | -47.2 | -46.5 | -37.6 | -44.1 | -48.1 | -48.1 | -48.1 |
| #14      | -36.9 <sup>c</sup> | -30.0 | -35.4 | -34.2 | -31.7 | -33.5 | -32.6 | -35.9 | -43.0 | -42.5 | -35.5 | -41.4 | -45.4 | -45.4 | -45.4 |
| #15      | -44.5 <sup>b</sup> | -26.0 | -37.6 | -39.7 | -38.0 | -39.1 | -32.6 | -42.8 | -52.7 | -51.7 | -40.7 | -49.3 | -54.0 | -54.0 | -54.0 |
| #16      | -41.8 <sup>b</sup> | -34.6 | -42.2 | -40.0 | -36.7 | -38.7 | -37.7 | -40.4 | -49.2 | -48.6 | -40.3 | -47.6 | -52.5 | -52.5 | -52.5 |
| #17      | -41.1 <sup>b</sup> | -33.0 | -41.3 | -39.1 | -35.7 | -37.8 | -36.7 | -39.9 | -49.0 | -48.2 | -39.5 | -47.2 | -52.0 | -52.0 | -52.0 |
| #18      | -42.5 <sup>d</sup> | -27.7 | -38.8 | -39.2 | -36.4 | -38.1 | -34.0 | -41.1 | -50.7 | -49.8 | -39.8 | -48.0 | -52.8 | -52.8 | -52.8 |
| #19      | -49.0 <sup>d</sup> | -22.1 | -40.2 | -43.8 | -41.9 | -43.1 | -33.0 | -47.5 | -60.2 | -58.7 | -44.4 | -55.7 | -61.0 | -61.0 | -61.0 |
| #20      | -45.2 <sup>b</sup> | -35.2 | -46.1 | -43.4 | -39.1 | -41.6 | -39.8 | -42.6 | -54.1 | -53.1 | -42.3 | -52.2 | -57.8 | -57.8 | -57.8 |
| #21      | -53.9 <sup>c</sup> | -12.7 | -40.8 | -47.3 | -46.6 | -47.4 | -31.0 | -53.4 | -69.3 | -67.2 | -48.1 | -62.5 | -68.4 | -68.4 | -68.4 |
| #22      | -46.5 <sup>b</sup> | -39.2 | -49.1 | -45.4 | -41.7 | -43.8 | -42.9 | -45.0 | -55.5 | -54.7 | -45.1 | -53.9 | -59.7 | -59.7 | -59.6 |
| #23      | -45.7 <sup>b</sup> | -37.5 | -48.1 | -44.6 | -40.8 | -43.0 | -41.8 | -44.4 | -55.2 | -54.3 | -44.4 | -53.5 | -59.2 | -59.2 | -59.1 |
| #24      | -49.2 <sup>b</sup> | -30.3 | -44.4 | -45.4 | -43.1 | -44.4 | -37.6 | -47.3 | -58.9 | -57.8 | -45.5 | -55.6 | -61.1 | -61.1 | -61.1 |
| #25      | -48.1 <sup>b</sup> | -26.9 | -42.2 | -43.2 | -40.8 | -42.4 | -35.2 | -45.7 | -57.9 | -56.6 | -43.5 | -54.3 | -59.6 | -59.6 | -59.6 |
| #26      | -47.3 <sup>b</sup> | -30.1 | -44.5 | -44.0 | -40.5 | -42.4 | -37.6 | -44.7 | -56.3 | -55.2 | -43.5 | -53.5 | -59.2 | -59.2 | -59.1 |
| #27      | -48.2 <sup>b</sup> | -34.5 | -46.4 | -45.7 | -42.5 | -44.2 | -39.6 | -46.1 | -57.3 | -56.4 | -45.3 | -55.0 | -60.6 | -60.6 | -60.6 |
| #28      | -51.5 <sup>b</sup> | -44.0 | -55.9 | -50.8 | -46.7 | -48.9 | -48.0 | -49.5 | -61.7 | -60.8 | -50.0 | -60.1 | -66.8 | -66.7 | -66.7 |
| #29      | -50.8 <sup>b</sup> | -42.2 | -54.9 | -50.1 | -45.8 | -48.2 | -46.9 | -49.0 | -61.4 | -60.4 | -49.2 | -59.7 | -66.3 | -66.3 | -66.3 |
| #30      | -50.4 <sup>b</sup> | -42.0 | -54.9 | -50.1 | -45.8 | -48.2 | -46.9 | -49.0 | -61.4 | -60.4 | -49.2 | -59.7 | -66.3 | -66.3 | -66.3 |
| #31      | -50.4 <sup>b</sup> | -39.7 | -52.9 | -49.0 | -44.2 | -46.9 | -44.8 | -47.1 | -60.4 | -59.3 | -47.1 | -58.5 | -64.9 | -64.9 | -64.9 |
| #32      | -53.7 <sup>b</sup> | -35.0 | -51.2 | -50.8 | -48.1 | -49.6 | -42.7 | -51.8 | -65.2 | -63.9 | -50.3 | -61.8 | -68.2 | -68.2 | -68.2 |
| #33      | -51.1 <sup>b</sup> | -34.6 | -51.3 | -49.5 | -45.5 | -47.7 | -42.7 | -49.3 | -62.6 | -61.4 | -48.3 | -59.7 | -66.3 | -66.2 | -66.2 |
| #34      | -52.4 <sup>b</sup> | -37.4 | -52.2 | -50.4 | -46.6 | -48.6 | -43.8 | -50.1 | -63.3 | -62.2 | -49.4 | -60.8 | -67.3 | -67.2 | -67.2 |
| #35      | -53.2 <sup>b</sup> | -39.3 | -53.3 | -50.7 | -47.4 | -49.2 | -44.9 | -50.7 | -63.5 | -62.4 | -50.2 | -61.2 | -67.7 | -67.6 | -67.6 |
| #36      | -52.6 <sup>b</sup> | -31.1 | -49.0 | -48.9 | -45.9 | -47.7 | -40.2 | -50.2 | -64.1 | -62.7 | -48.3 | -60.5 | -66.7 | -66.7 | -66.7 |
| #37      | -50.9 <sup>b</sup> | -32.1 | -50.0 | -48.9 | -44.4 | -46.5 | -41.2 | -48.1 | -61.7 | -60.4 | -47.0 | -58.6 | -65.2 | -65.2 | -65.2 |
| #38      | -50.4 <sup>b</sup> | -31.6 | -49.2 | -48.5 | -44.0 | -46.3 | -40.5 | -47.4 | -61.7 | -60.2 | -46.1 | -58.5 | -64.9 | -64.8 | -64.8 |
| #39      | -51.4 <sup>b</sup> | -27.7 | -47.0 | -47.5 | -44.0 | -46.4 | -38.3 | -48.7 | -63.7 | -61.9 | -46.3 | -59.6 | -65.7 | -65.6 | -65.6 |
| #40      | -52.6 <sup>b</sup> | -24.4 | -46.0 | -48.9 | -46.2 | -47.7 | -36.9 | -51.3 | -66.1 | -64.4 | -48.3 | -61.3 | -67.6 | -67.5 | -67.5 |
| #41      | -53.5 <sup>b</sup> | -29.1 | -47.7 | -50.5 | -48.2 | -49.2 | -38.6 | -51.6 | -65.8 | -64.3 | -49.4 | -61.8 | -68.2 | -68.1 | -68.1 |
| #42      | -51.7 <sup>b</sup> | -22.2 | -44.8 | -47.7 | -44.7 | -46.3 | -35.5 | -50.2 | -65.2 | -63.4 | -46.9 | -60.3 | -66.5 | -66.4 | -66.4 |

... continued on next page ...

Table S22: . . . continued from previous page . . .

| Molecule | Ref.               | MNDO  | AMI   | PM3   | PM6   | PM7   | OM1   |       | OM2   |       | OM3   |       | OM3   |       | D3T   |
|----------|--------------------|-------|-------|-------|-------|-------|-------|-------|-------|-------|-------|-------|-------|-------|-------|
|          |                    |       |       |       |       |       | D2    | D3    | D2    | D3    | D2    | D3    | D2    | D3    |       |
| #43      | -51.9 <sup>b</sup> | -28.4 | -47.8 | -48.6 | -45.2 | -47.0 | -38.8 | -49.6 | -64.0 | -62.5 | -62.4 | -47.6 | -60.2 | -66.6 | -66.5 |
| #44      | -55.6 <sup>c</sup> | -28.0 | -51.3 | -50.7 | -47.0 | -50.1 | -40.9 | -51.4 | -69.0 | -67.0 | -66.8 | -48.8 | -64.7 | -71.5 | -71.3 |
| #45      | -56.7 <sup>b</sup> | -12.3 | -45.2 | -52.1 | -49.4 | -50.7 | -33.3 | -55.9 | -74.3 | -71.9 | -71.7 | -50.4 | -67.0 | -73.8 | -73.6 |
| #46      | -56.6 <sup>b</sup> | -20.9 | -45.2 | -50.1 | -49.9 | -48.7 | -33.1 | -53.5 | -69.7 | -67.5 | -67.3 | -50.7 | -63.7 | -70.7 | -70.6 |
| #47      | -57.8 <sup>b</sup> | -19.6 | -46.3 | -52.5 | -51.9 | -51.6 | -34.4 | -54.7 | -72.2 | -70.2 | -70.0 | -50.8 | -66.6 | -73.4 | -73.2 |
| #48      | -56.4 <sup>b</sup> | -13.6 | -44.8 | -48.0 | -45.9 | -47.7 | -33.0 | -51.5 | -69.7 | -67.3 | -67.1 | -47.1 | -63.5 | -70.3 | -70.1 |
| #49      | 12.4 <sup>b</sup>  | 15.4  | 16.5  | 16.6  | 15.7  | 13.9  | 11.9  | 12.9  | 12.0  | 11.7  | 11.7  | 13.9  | 13.4  | 12.0  | 12.0  |
| #50      | 4.9 <sup>b</sup>   | 5.2   | 7.1   | 7.1   | 5.6   | 4.2   | 4.6   | 5.5   | 3.4   | 3.1   | 3.1   | 5.6   | 4.2   | 1.8   | 1.8   |
| #51      | -0.2 <sup>b</sup>  | -0.2  | 0.2   | 1.4   | 1.2   | -0.4  | -0.6  | 0.1   | -3.6  | -3.8  | -3.8  | 0.3   | -2.3  | -5.7  | -5.7  |
| #52      | -5.3 <sup>b</sup>  | -5.0  | -6.7  | -4.0  | -3.9  | -5.6  | -5.9  | -4.6  | -9.9  | -10.0 | -9.9  | -4.6  | -8.6  | -12.8 | -12.8 |
| #53      | -9.9 <sup>b</sup>  | -9.8  | -13.5 | -9.4  | -8.9  | -10.7 | -11.1 | -9.1  | -16.1 | -16.0 | -16.0 | -9.4  | -14.8 | -19.9 | -19.9 |
| #54      | -14.8 <sup>b</sup> | -14.5 | -20.4 | -14.8 | -13.9 | -15.7 | -16.2 | -13.7 | -22.3 | -22.1 | -22.1 | -14.2 | -21.0 | -27.0 | -27.0 |
| #55      | -19.4 <sup>b</sup> | -19.2 | -27.2 | -20.3 | -18.9 | -20.8 | -21.4 | -18.3 | -28.5 | -28.2 | -28.2 | -19.1 | -27.2 | -34.0 | -34.0 |
| #56      | -25.0 <sup>c</sup> | -23.9 | -34.1 | -25.7 | -23.9 | -26.0 | -26.5 | -22.8 | -34.7 | -34.3 | -34.2 | -23.9 | -33.5 | -41.1 | -41.1 |
| #57      | -29.8 <sup>f</sup> | -28.6 | -40.9 | -31.1 | -28.9 | -31.1 | -31.7 | -27.4 | -40.9 | -40.3 | -40.3 | -28.7 | -39.7 | -48.2 | -48.2 |
| #58      | -3.0 <sup>b</sup>  | -5.1  | -3.3  | -3.8  | -3.5  | -5.1  | -3.1  | -3.8  | -7.2  | -7.5  | -7.5  | -4.0  | -6.4  | -9.8  | -9.8  |
| #59      | -1.9 <sup>b</sup>  | -3.9  | -2.2  | -3.6  | -2.5  | -4.1  | -2.2  | -1.9  | -5.5  | -5.8  | -5.8  | -2.2  | -4.8  | -8.3  | -8.2  |
| #60      | -7.0 <sup>b</sup>  | -9.0  | -8.9  | -7.8  | -7.3  | -9.0  | -7.3  | -6.9  | -12.3 | -12.4 | -12.4 | -7.2  | -11.3 | -15.6 | -15.6 |
| #61      | -7.9 <sup>b</sup>  | -9.5  | -9.7  | -8.7  | -8.0  | -9.8  | -8.1  | -8.3  | -13.2 | -13.5 | -13.5 | -8.6  | -12.2 | -16.6 | -16.6 |
| #62      | -12.5 <sup>b</sup> | -14.1 | -15.8 | -14.0 | -12.4 | -14.1 | -12.1 | -11.6 | -18.2 | -18.2 | -18.2 | -12.1 | -17.1 | -22.3 | -22.3 |
| #63      | -12.9 <sup>b</sup> | -15.1 | -16.6 | -14.2 | -13.1 | -14.9 | -13.4 | -13.0 | -19.6 | -19.7 | -19.7 | -13.5 | -18.5 | -23.7 | -23.7 |
| #64      | -11.4 <sup>b</sup> | -14.3 | -15.6 | -13.5 | -11.7 | -13.9 | -11.3 | -11.0 | -18.2 | -18.0 | -17.9 | -11.3 | -16.6 | -21.9 | -21.9 |
| #65      | -13.0 <sup>b</sup> | -15.5 | -16.1 | -13.7 | -12.5 | -14.5 | -13.2 | -12.8 | -19.3 | -19.5 | -19.5 | -13.2 | -18.1 | -23.4 | -23.4 |
| #66      | -4.3 <sup>b</sup>  | -1.4  | -1.1  | -2.1  | -5.0  | -5.6  | 0.2   | -3.1  | -6.8  | -7.0  | -7.0  | -2.9  | -5.7  | -9.0  | -9.0  |
| #67      | -10.1 <sup>b</sup> | -10.5 | -10.0 | -12.1 | -12.3 | -13.6 | -7.0  | -11.6 | -17.1 | -17.2 | -17.2 | -11.4 | -15.6 | -20.0 | -19.9 |
| #68      | -8.6 <sup>b</sup>  | -6.5  | -6.8  | -7.9  | -8.8  | -9.9  | -5.2  | -8.7  | -14.3 | -14.4 | -14.3 | -8.2  | -12.5 | -16.8 | -16.8 |
| #69      | -6.6 <sup>b</sup>  | -2.3  | -4.4  | -3.9  | -4.6  | -6.1  | -4.0  | -6.5  | -12.2 | -12.2 | -12.2 | -5.6  | -10.0 | -14.2 | -14.2 |
| #70      | -16.4 <sup>b</sup> | -13.2 | -16.3 | -20.1 | -19.6 | -21.4 | -9.9  | -19.8 | -27.4 | -27.3 | -27.2 | -18.9 | -25.1 | -30.2 | -30.2 |
| #71      | -15.2 <sup>b</sup> | -7.2  | -10.6 | -12.4 | -13.7 | -14.8 | -7.9  | -14.8 | -22.6 | -22.4 | -22.3 | -13.5 | -19.8 | -25.0 | -25.0 |
| #72      | -14.2 <sup>b</sup> | -11.3 | -13.7 | -13.3 | -14.0 | -15.3 | -10.5 | -13.4 | -20.7 | -20.6 | -20.6 | -13.1 | -18.9 | -24.0 | -23.9 |
| #73      | -11.8 <sup>b</sup> | -4.9  | -9.5  | -7.4  | -7.8  | -9.5  | -7.4  | -9.3  | -17.2 | -16.9 | -16.9 | -8.4  | -14.8 | -19.8 | -19.8 |
| #74      | -12.2 <sup>b</sup> | -5.6  | -10.9 | -9.4  | -9.8  | -11.0 | -8.4  | -10.4 | -18.0 | -17.8 | -17.7 | -9.8  | -15.9 | -20.8 | -20.8 |
| #75      | -16.0 <sup>b</sup> | -15.3 | -16.7 | -16.9 | -17.1 | -18.3 | -11.4 | -15.7 | -23.0 | -23.0 | -22.9 | -15.6 | -21.2 | -26.5 | -26.5 |
| #76      | -14.9 <sup>b</sup> | -14.5 | -15.7 | -16.8 | -16.2 | -18.1 | -11.3 | -15.8 | -23.3 | -23.2 | -23.2 | -15.5 | -21.5 | -26.7 | -26.7 |
| #77      | -15.1 <sup>b</sup> | -14.9 | -15.6 | -16.7 | -16.2 | -18.1 | -11.8 | -16.0 | -23.4 | -23.3 | -23.3 | -15.7 | -21.6 | -26.8 | -26.8 |
| #78      | -13.7 <sup>b</sup> | -11.2 | -13.1 | -12.8 | -13.2 | -14.6 | -10.0 | -13.1 | -20.0 | -19.9 | -19.9 | -12.7 | -18.6 | -23.8 | -23.8 |
| #79      | -14.7 <sup>b</sup> | -11.4 | -12.9 | -12.8 | -12.9 | -14.3 | -10.3 | -13.5 | -20.8 | -20.7 | -20.7 | -13.0 | -18.7 | -23.9 | -23.9 |
| #80      | -13.4 <sup>b</sup> | -11.0 | -12.5 | -12.4 | -12.6 | -14.4 | -10.1 | -13.2 | -20.7 | -20.6 | -20.5 | -12.4 | -18.5 | -23.6 | -23.5 |
| #81      | -14.5 <sup>b</sup> | 1.9   | -6.4  | -8.6  | -10.3 | -11.2 | -3.7  | -13.1 | -21.4 | -21.0 | -20.9 | -10.6 | -17.5 | -22.4 | -22.3 |
| #82      | -15.7 <sup>b</sup> | -9.9  | -17.8 | -15.0 | -14.6 | -16.1 | -13.3 | -14.9 | -24.2 | -23.8 | -23.8 | -14.6 | -22.2 | -28.0 | -27.9 |
| #83      | -18.4 <sup>b</sup> | -19.4 | -22.3 | -21.9 | -20.9 | -23.0 | -16.8 | -20.7 | -29.7 | -29.6 | -29.5 | -20.6 | -27.8 | -33.9 | -33.9 |
| #84      | -19.0 <sup>b</sup> | -18.9 | -22.3 | -22.7 | -21.0 | -23.1 | -16.3 | -20.5 | -29.6 | -29.5 | -29.4 | -20.3 | -27.7 | -33.8 | -33.7 |
| #85      | -20.0 <sup>b</sup> | -11.3 | -17.2 | -19.1 | -19.9 | -20.9 | -13.0 | -19.2 | -29.0 | -28.7 | -28.6 | -18.3 | -26.4 | -32.4 | -32.3 |
| #86      | -19.4 <sup>b</sup> | -1.9  | -13.3 | -15.0 | -16.6 | -17.2 | -8.9  | -17.9 | -28.4 | -27.7 | -27.7 | -15.7 | -24.5 | -30.3 | -30.2 |

. . . continued on next page . . .

Table S22: . . . continued from previous page . . .

| Molecule | Ref.               | MNDO  | AMI   | PM3   | PM6   | PM7   | OM1   |       | OM2   |       | OM3   |       | OM3   |       | OM3   |  | D3T |
|----------|--------------------|-------|-------|-------|-------|-------|-------|-------|-------|-------|-------|-------|-------|-------|-------|--|-----|
|          |                    |       |       |       |       |       | D2    | D3    | D2    | D3T   | D2    | D3    | D2    | D3    |       |  |     |
| #87      | -21.2 <sup>b</sup> | -17.0 | -20.7 | -22.5 | -23.1 | -24.2 | -14.6 | -22.4 | -31.7 | -31.5 | -31.4 | -21.6 | -29.1 | -35.2 | -35.1 |  |     |
| #88      | -21.2 <sup>b</sup> | -8.1  | -16.2 | -18.6 | -19.7 | -20.7 | -11.0 | -21.7 | -31.5 | -31.1 | -31.0 | -19.6 | -27.7 | -33.6 | -33.6 |  |     |
| #89      | -17.4 <sup>b</sup> | -5.0  | -13.5 | -17.7 | -18.3 | -18.5 | -7.7  | -18.0 | -28.3 | -27.8 | -27.7 | -15.9 | -24.7 | -30.5 | -30.4 |  |     |
| #90      | -19.0 <sup>b</sup> | -11.4 | -16.1 | -16.9 | -17.5 | -19.3 | -12.6 | -19.2 | -29.1 | -28.7 | -28.7 | -17.7 | -25.9 | -31.9 | -31.9 |  |     |
| #91      | -20.4 <sup>b</sup> | 0.3   | -11.9 | -16.4 | -18.6 | -19.5 | -6.5  | -21.4 | -32.1 | -31.4 | -31.3 | -18.1 | -27.2 | -33.0 | -32.9 |  |     |
| #92      | -21.3 <sup>b</sup> | -9.6  | -20.1 | -23.6 | -23.0 | -23.5 | -12.6 | -22.7 | -34.7 | -34.1 | -34.0 | -20.6 | -30.8 | -37.6 | -37.5 |  |     |
| #93      | -25.7 <sup>b</sup> | -13.2 | -22.4 | -23.8 | -24.3 | -25.5 | -16.1 | -26.3 | -37.6 | -37.2 | -37.1 | -24.2 | -33.6 | -40.5 | -40.5 |  |     |
| #94      | -24.0 <sup>b</sup> | -13.4 | -22.2 | -22.0 | -22.7 | -24.9 | -16.9 | -23.6 | -35.9 | -35.3 | -35.2 | -22.2 | -32.6 | -39.5 | -39.4 |  |     |
| #95      | -26.4 <sup>b</sup> | -6.3  | -19.6 | -22.5 | -26.2 | -26.5 | -12.6 | -25.8 | -38.8 | -37.8 | -37.7 | -23.2 | -34.3 | -40.8 | -40.7 |  |     |
| #96      | -25.1 <sup>b</sup> | -9.8  | -20.8 | -27.1 | -28.3 | -28.1 | -11.9 | -27.2 | -39.4 | -38.7 | -38.7 | -24.6 | -35.0 | -41.7 | -41.7 |  |     |
| #97      | 45.6 <sup>b</sup>  | 43.9  | 46.1  | 47.1  | 37.5  | 36.9  | 45.4  | 45.9  | 44.7  | 44.3  | 44.3  | 45.5  | 44.9  | 42.9  | 42.9  |  |     |
| #98      | 38.8 <sup>b</sup>  | 33.5  | 37.1  | 38.0  | 30.1  | 29.0  | 38.4  | 38.1  | 35.8  | 35.2  | 35.2  | 37.6  | 36.1  | 33.0  | 33.0  |  |     |
| #99      | 33.6 <sup>b</sup>  | 28.3  | 30.7  | 33.0  | 25.3  | 24.2  | 33.2  | 33.3  | 29.4  | 29.0  | 29.0  | 32.8  | 30.1  | 26.0  | 26.0  |  |     |
| #100     | 31.8 <sup>b</sup>  | 23.2  | 28.1  | 28.9  | 22.1  | 20.7  | 31.6  | 30.4  | 26.8  | 26.2  | 26.2  | 29.5  | 27.2  | 23.0  | 23.0  |  |     |
| #101     | 30.9 <sup>g</sup>  | 26.1  | 30.1  | 29.2  | 21.5  | 20.4  | 33.9  | 29.4  | 25.5  | 24.9  | 24.9  | 29.3  | 26.5  | 22.4  | 22.4  |  |     |
| #102     | 63.3 <sup>h</sup>  | 50.1  | 57.2  | 59.5  | 58.4  | 57.5  | 66.2  | 64.2  | 60.3  | 59.6  | 59.5  | 62.4  | 59.9  | 55.2  | 55.1  |  |     |
| #103     | 26.1 <sup>b</sup>  | 29.0  | 29.9  | 31.0  | 28.5  | 27.2  | 28.2  | 29.4  | 26.8  | 26.3  | 26.3  | 30.3  | 28.6  | 25.5  | 25.5  |  |     |
| #104     | 18.1 <sup>b</sup>  | 18.9  | 19.8  | 20.7  | 18.6  | 17.3  | 20.3  | 20.5  | 16.6  | 16.1  | 16.1  | 20.9  | 18.2  | 14.0  | 14.0  |  |     |
| #105     | 19.1 <sup>b</sup>  | 19.1  | 20.6  | 21.3  | 19.1  | 17.8  | 20.8  | 21.4  | 17.3  | 16.9  | 16.9  | 21.8  | 18.9  | 14.7  | 14.7  |  |     |
| #106     | 25.2 <sup>b</sup>  | 24.6  | 24.7  | 26.5  | 23.6  | 22.5  | 24.1  | 26.0  | 21.9  | 21.4  | 21.4  | 26.3  | 23.4  | 19.3  | 19.3  |  |     |
| #107     | 41.1 <sup>i</sup>  | 42.6  | 42.9  | 45.1  | 41.2  | 40.0  | 43.4  | 44.8  | 40.4  | 39.7  | 39.7  | 45.8  | 42.7  | 37.9  | 37.9  |  |     |
| #108     | 20.1 <sup>b</sup>  | 19.6  | 17.8  | 21.1  | 18.4  | 17.2  | 18.6  | 21.0  | 15.3  | 14.9  | 14.9  | 21.2  | 17.0  | 11.9  | 11.9  |  |     |
| #109     | 18.1 <sup>b</sup>  | 21.9  | 23.3  | 22.7  | 18.9  | 18.0  | 24.5  | 21.4  | 16.9  | 16.6  | 16.6  | 22.6  | 19.3  | 15.2  | 15.2  |  |     |
| #110     | 10.8 <sup>b</sup>  | 15.2  | 17.3  | 13.7  | 9.3   | 8.5   | 19.7  | 12.6  | 6.3   | 6.0   | 6.0   | 13.9  | 9.2   | 4.0   | 4.0   |  |     |
| #111     | 11.4 <sup>l</sup>  | 13.4  | 13.1  | 11.3  | 9.1   | 8.2   | 16.4  | 12.6  | 6.7   | 6.4   | 6.4   | 13.3  | 8.8   | 3.8   | 3.8   |  |     |
| #112     | 54.3 <sup>b</sup>  | 57.9  | 54.8  | 50.7  | 56.7  | 57.1  | 53.6  | 54.2  | 53.9  | 53.6  | 53.6  | 54.7  | 54.6  | 53.7  | 53.7  |  |     |
| #113     | 44.4 <sup>b</sup>  | 41.4  | 43.4  | 40.2  | 45.4  | 46.0  | 45.0  | 44.5  | 43.3  | 42.9  | 42.9  | 44.1  | 43.5  | 41.5  | 41.5  |  |     |
| #114     | 39.5 <sup>b</sup>  | 36.1  | 37.5  | 35.7  | 41.2  | 41.7  | 39.9  | 39.5  | 36.8  | 36.5  | 36.5  | 39.2  | 37.5  | 34.6  | 34.6  |  |     |
| #115     | 34.4 <sup>k</sup>  | 31.3  | 30.6  | 30.2  | 35.9  | 36.4  | 34.4  | 34.6  | 30.3  | 30.1  | 30.1  | 34.2  | 31.1  | 27.4  | 27.4  |  |     |
| #116     | 29.2 <sup>k</sup>  | 26.6  | 23.8  | 24.8  | 30.9  | 31.4  | 29.2  | 30.0  | 24.1  | 24.1  | 24.1  | 29.4  | 25.0  | 20.3  | 20.3  |  |     |
| #117     | 24.8 <sup>k</sup>  | 21.9  | 16.9  | 19.4  | 25.9  | 26.3  | 24.0  | 25.5  | 17.9  | 18.0  | 18.0  | 24.6  | 18.7  | 13.3  | 13.3  |  |     |
| #118     | 19.3 <sup>k</sup>  | 17.1  | 10.1  | 14.0  | 20.9  | 21.2  | 18.9  | 20.9  | 11.7  | 11.9  | 11.9  | 19.8  | 12.5  | 6.2   | 6.2   |  |     |
| #119     | 14.9 <sup>k</sup>  | 12.4  | 3.2   | 8.6   | 15.9  | 16.1  | 13.8  | 16.3  | 5.5   | 5.8   | 5.8   | 14.9  | 6.3   | -0.9  | -0.9  |  |     |
| #120     | 10.0 <sup>f</sup>  | 7.7   | -3.6  | 3.2   | 10.9  | 11.0  | 8.6   | 11.8  | -0.7  | -0.2  | -0.2  | 10.1  | 0.1   | -8.0  | -8.0  |  |     |
| #121     | 34.7 <sup>b</sup>  | 24.9  | 32.0  | 29.8  | 35.1  | 35.3  | 36.5  | 35.1  | 33.0  | 32.4  | 32.4  | 33.8  | 32.6  | 29.6  | 29.6  |  |     |
| #122     | 30.7 <sup>k</sup>  | 19.6  | 26.1  | 25.3  | 30.8  | 30.9  | 31.3  | 30.0  | 26.4  | 26.0  | 26.0  | 28.9  | 26.5  | 22.6  | 22.6  |  |     |
| #123     | 25.7 <sup>k</sup>  | 14.8  | 19.2  | 19.8  | 25.5  | 25.7  | 25.9  | 25.1  | 19.9  | 19.6  | 19.6  | 23.9  | 20.2  | 15.4  | 15.4  |  |     |
| #124     | 25.2 <sup>k</sup>  | 14.4  | 20.2  | 20.7  | 26.4  | 26.4  | 26.2  | 25.0  | 20.0  | 19.5  | 19.5  | 24.0  | 20.5  | 15.6  | 15.6  |  |     |
| #125     | 32.6 <sup>d</sup>  | 33.9  | 33.3  | 30.7  | 35.5  | 36.3  | 36.4  | 32.4  | 27.9  | 27.8  | 27.8  | 32.9  | 29.6  | 25.8  | 25.8  |  |     |
| #126     | 25.6 <sup>l</sup>  | 35.4  | 30.8  | 25.3  | 28.8  | 30.2  | 35.1  | 23.8  | 17.0  | 17.2  | 17.2  | 25.9  | 20.5  | 15.9  | 16.0  |  |     |
| #127     | 20.3 <sup>m</sup>  | 10.1  | 12.4  | 14.4  | 20.5  | 20.7  | 20.7  | 20.6  | 13.8  | 13.6  | 13.6  | 19.1  | 14.0  | 8.3   | 8.3   |  |     |
| #128     | 113.0 <sup>d</sup> | 103.2 | 106.1 | 102.5 | 110.9 | 112.7 | 117.6 | 118.0 | 117.0 | 116.6 | 116.6 | 116.1 | 115.7 | 113.7 | 113.7 |  |     |
| #129     | 19.8 <sup>m</sup>  | 9.6   | 13.3  | 15.3  | 21.1  | 21.2  | 20.7  | 20.1  | 13.4  | 13.1  | 13.1  | 18.9  | 14.1  | 8.3   | 8.3   |  |     |
| #130     | 15.2 <sup>m</sup>  | 5.4   | 5.5   | 9.0   | 15.5  | 15.6  | 15.6  | 16.0  | 7.5   | 7.5   | 7.5   | 14.2  | 7.8   | 1.3   | 1.3   |  |     |

. . . continued on next page . . .

Table S22: . . . continued from previous page . . .

| Molecule | Ref.               | MNDO  | AMI   | PM3   | PM6   | PM7   | OM1   |       | OM2   |       | OM3   |       | OM3   |       | D3T |
|----------|--------------------|-------|-------|-------|-------|-------|-------|-------|-------|-------|-------|-------|-------|-------|-----|
|          |                    |       |       |       |       |       | D2    | D3    | D2    | D3    | D2    | D3    | D2    | D3    |     |
| #131     | 14.9 <sup>m</sup>  | 4.8   | 6.5   | 9.9   | 16.2  | 16.2  | 15.6  | 7.2   | 7.1   | 14.1  | 8.0   | 1.3   | 1.3   | 1.3   |     |
| #132     | 14.4 <sup>m</sup>  | 4.7   | 6.4   | 9.8   | 15.8  | 16.0  | 15.3  | 6.9   | 6.7   | 13.9  | 7.8   | 1.1   | 1.1   | 1.1   |     |
| #133     | 72.8 <sup>d</sup>  | 65.6  | 67.9  | 66.4  | 69.1  | 69.7  | 70.6  | 71.2  | 69.0  | 71.2  | 70.3  | 67.6  | 67.6  | 67.6  |     |
| #134     | 61.1 <sup>n</sup>  | 55.8  | 58.4  | 56.6  | 59.4  | 60.0  | 62.7  | 62.7  | 58.9  | 62.3  | 60.2  | 56.4  | 56.4  | 56.4  |     |
| #135     | 61.4 <sup>n</sup>  | 55.4  | 57.8  | 56.0  | 58.8  | 59.5  | 62.3  | 61.8  | 58.2  | 61.5  | 59.6  | 55.9  | 55.9  | 55.9  |     |
| #136     | 61.8 <sup>o</sup>  | 58.2  | 60.9  | 57.3  | 59.3  | 60.4  | 65.8  | 61.8  | 58.1  | 62.1  | 59.9  | 56.3  | 56.3  | 56.3  |     |
| #137     | 19.8 <sup>b</sup>  | 21.3  | 22.0  | 23.5  | 24.2  | 23.0  | 17.1  | 18.8  | 13.8  | 18.5  | 16.4  | 10.6  | 10.6  | 10.6  |     |
| #138     | 36.0 <sup>b</sup>  | 38.3  | 40.6  | 40.7  | 40.1  | 39.7  | 40.2  | 34.8  | 25.3  | 35.7  | 31.0  | 21.0  | 21.0  | 21.0  |     |
| #139     | 55.2 <sup>b</sup>  | 58.9  | 62.9  | 61.7  | 59.5  | 60.4  | 68.0  | 55.5  | 41.4  | 57.5  | 50.2  | 35.8  | 35.8  | 35.8  |     |
| #140     | 43.5 <sup>b</sup>  | 46.1  | 47.7  | 48.1  | 47.0  | 45.6  | 44.5  | 39.0  | 27.0  | 40.2  | 33.9  | 21.9  | 21.9  | 21.9  |     |
| #141     | 73.5 <sup>b</sup>  | 72.1  | 84.4  | 81.3  | 76.2  | 79.1  | 86.9  | 83.4  | 74.0  | 82.5  | 77.3  | 68.1  | 68.1  | 68.1  |     |
| #142     | 39.1 <sup>b</sup>  | 38.3  | 45.8  | 40.7  | 40.1  | 40.8  | 43.0  | 37.5  | 29.0  | 37.5  | 33.3  | 24.4  | 24.4  | 24.4  |     |
| #143     | 100.5 <sup>f</sup> | 94.8  | 120.4 | 109.8 | 98.3  | 106.3 | 113.6 | 103.7 | 93.3  | 103.2 | 98.1  | 87.1  | 87.1  | 87.1  |     |
| #144     | 12.0 <sup>b</sup>  | 13.6  | 14.4  | 14.1  | 14.2  | 13.2  | 12.2  | 9.5   | 2.9   | 9.6   | 6.1   | -0.6  | -0.6  | -0.6  |     |
| #145     | 7.2 <sup>b</sup>   | 8.8   | 8.6   | 9.9   | 10.2  | 8.5   | 7.1   | 4.8   | -3.5  | 5.0   | -0.0  | -7.7  | -7.7  | -7.7  |     |
| #146     | 35.3 <sup>b</sup>  | 37.6  | 38.7  | 39.2  | 37.9  | 36.7  | 36.6  | 34.7  | 27.3  | 35.6  | 31.6  | 24.1  | 24.1  | 24.1  |     |
| #147     | 78.2 <sup>d</sup>  | 73.9  | 76.5  | 74.7  | 78.4  | 79.3  | 78.7  | 75.3  | 69.0  | 75.6  | 72.8  | 65.7  | 65.7  | 65.7  |     |
| #148     | 0.9 <sup>d</sup>   | 8.2   | 4.7   | 4.8   | 5.0   | 3.2   | 4.5   | -1.5  | -11.8 | -0.5  | -7.6  | -16.1 | -16.1 | -16.1 |     |
| #149     | 1.9 <sup>d</sup>   | 4.0   | 1.7   | 4.3   | 4.9   | 3.2   | 3.3   | 0.1   | -9.3  | 0.1   | -6.4  | -15.0 | -15.0 | -15.0 |     |
| #150     | 27.0 <sup>d</sup>  | 30.6  | 32.4  | 31.4  | 28.2  | 27.0  | 32.2  | 25.8  | 16.5  | 27.1  | 21.5  | 12.9  | 13.0  | 13.0  |     |
| #151     | 29.0 <sup>d</sup>  | 28.1  | 30.3  | 30.9  | 28.7  | 27.1  | 30.4  | 27.7  | 18.4  | 28.1  | 22.7  | 14.0  | 14.0  | 14.0  |     |
| #152     | 28.0 <sup>d</sup>  | 27.5  | 28.6  | 28.7  | 28.0  | 26.8  | 28.8  | 25.9  | 17.1  | 26.4  | 21.3  | 12.8  | 12.8  | 12.8  |     |
| #153     | 4.6 <sup>b</sup>   | 8.3   | 7.4   | 5.5   | 5.7   | 4.3   | 8.2   | 0.3   | -8.2  | 1.3   | -4.1  | -11.7 | -11.7 | -11.7 |     |
| #154     | 4.1 <sup>b</sup>   | 5.9   | 6.9   | 4.8   | 4.0   | 3.4   | 7.3   | 0.2   | -7.3  | 0.7   | -4.2  | -11.9 | -11.9 | -11.9 |     |
| #155     | 4.3 <sup>b</sup>   | 5.7   | 6.8   | 4.7   | 4.7   | 3.7   | 7.3   | 0.3   | -7.2  | 0.8   | -4.1  | -11.8 | -11.8 | -11.8 |     |
| #156     | 0.4 <sup>b</sup>   | 4.4   | 2.1   | 0.7   | 1.8   | -0.3  | 3.9   | -3.7  | -14.1 | -2.5  | -9.8  | -18.3 | -18.3 | -18.3 |     |
| #157     | -0.4 <sup>b</sup>  | 1.1   | 1.1   | 0.1   | 0.0   | -1.3  | 2.2   | -4.5  | -13.9 | -3.9  | -10.4 | -19.0 | -19.0 | -19.0 |     |
| #158     | -0.8 <sup>b</sup>  | 0.9   | 1.0   | 0.1   | 0.5   | -1.0  | 2.3   | -4.4  | -13.7 | -3.8  | -10.2 | -18.9 | -18.9 | -18.9 |     |
| #159     | -3.3 <sup>b</sup>  | 0.6   | -0.1  | -3.8  | -4.1  | -5.2  | 3.3   | -8.8  | -18.9 | -7.5  | -14.3 | -22.9 | -22.9 | -22.9 |     |
| #160     | -2.3 <sup>b</sup>  | 4.7   | 1.2   | -2.8  | -2.3  | -3.9  | 5.3   | -7.6  | -17.7 | -5.8  | -13.1 | -21.6 | -21.6 | -21.6 |     |
| #161     | -3.8 <sup>b</sup>  | -1.6  | -0.7  | -4.5  | -6.4  | -6.5  | 2.4   | -9.0  | -18.2 | -8.1  | -14.5 | -23.1 | -23.1 | -23.1 |     |
| #162     | 14.4 <sup>b</sup>  | 6.5   | 11.5  | 11.2  | 12.2  | 12.8  | 12.1  | 9.7   | 0.8   | 9.2   | 3.8   | -5.2  | -5.2  | -5.2  |     |
| #163     | 12.7 <sup>b</sup>  | 11.2  | 17.8  | 16.3  | 11.2  | 12.0  | 7.2   | 9.9   | 7.6   | 10.1  | 8.7   | 6.3   | 6.3   | 6.3   |     |
| #164     | 6.8 <sup>b</sup>   | -11.9 | -1.0  | -3.8  | -3.5  | -2.3  | -1.9  | 3.0   | -1.1  | 2.9   | -0.0  | -3.3  | -3.3  | -3.3  |     |
| #165     | -18.4 <sup>b</sup> | -30.5 | -28.8 | -23.9 | -20.1 | -20.0 | -24.8 | -19.7 | -25.8 | -20.8 | -25.2 | -29.8 | -29.8 | -29.8 |     |
| #166     | -29.5 <sup>b</sup> | -34.7 | -38.5 | -31.0 | -27.5 | -27.4 | -31.2 | -27.0 | -35.8 | -28.4 | -35.1 | -40.5 | -40.5 | -40.5 |     |
| #167     | -28.2 <sup>b</sup> | -33.6 | -40.7 | -30.9 | -28.5 | -27.9 | -30.0 | -23.7 | -35.1 | -26.4 | -35.5 | -41.5 | -41.5 | -41.5 |     |
| #168     | -29.7 <sup>b</sup> | -34.6 | -45.1 | -34.2 | -31.7 | -31.2 | -31.3 | -23.8 | -37.4 | -27.8 | -39.1 | -45.7 | -45.7 | -45.7 |     |
| #169     | -31.7 <sup>b</sup> | -34.1 | -50.1 | -39.8 | -36.2 | -35.6 | -32.6 | -25.6 | -41.8 | -29.3 | -43.3 | -50.4 | -50.4 | -50.4 |     |
| #170     | 5.5 <sup>e</sup>   | 4.0   | 10.8  | 8.6   | 4.0   | 5.5   | 3.1   | 4.9   | 0.9   | 4.6   | 1.8   | -1.4  | -1.4  | -1.4  |     |
| #171     | -25.3 <sup>b</sup> | -32.8 | -34.1 | -29.9 | -26.9 | -26.4 | -28.8 | -26.7 | -34.9 | -27.5 | -33.7 | -39.1 | -39.1 | -39.1 |     |
| #172     | -35.2 <sup>p</sup> | -35.2 | -42.3 | -35.8 | -32.7 | -32.4 | -33.1 | -32.2 | -43.6 | -33.0 | -42.0 | -48.1 | -48.1 | -48.1 |     |
| #173     | 1.1 <sup>q</sup>   | -0.8  | 4.4   | 3.4   | -0.7  | 0.6   | -2.1  | 0.1   | -5.7  | -0.3  | -4.6  | -8.6  | -8.6  | -8.6  |     |
| #174     | -30.3 <sup>b</sup> | -36.6 | -40.3 | -34.9 | -31.3 | -31.2 | -33.6 | -31.1 | -41.2 | -32.0 | -39.9 | -46.1 | -46.1 | -46.1 |     |

. . . continued on next page . . .

Table S22: . . . continued from previous page . . .

| Molecule | Ref.               | MNDO  | AMI   | PM3   | PM6   | PM7   | OM1   |       | OM2   |       | OM3   |       | OM3   |       | D3T   |
|----------|--------------------|-------|-------|-------|-------|-------|-------|-------|-------|-------|-------|-------|-------|-------|-------|
|          |                    |       |       |       |       |       | D2    | D3    | D2    | D3    | D2    | D3    | D2    | D3    |       |
| #175     | -35.4 <sup>b</sup> | -41.2 | -47.2 | -40.3 | -36.4 | -36.4 | -38.7 | -35.7 | -47.5 | -46.6 | -46.6 | -36.8 | -46.1 | -53.2 | -53.2 |
| #176     | -40.2 <sup>d</sup> | -45.9 | -54.0 | -45.8 | -41.4 | -41.5 | -43.9 | -40.2 | -53.7 | -52.7 | -52.7 | -41.6 | -52.4 | -60.3 | -60.3 |
| #177     | -41.0 <sup>b</sup> | -39.4 | -49.7 | -41.7 | -38.3 | -38.5 | -39.0 | -38.0 | -50.9 | -49.6 | -49.5 | -38.9 | -49.2 | -56.3 | -56.2 |
| #178     | -46.2 <sup>b</sup> | -43.1 | -55.5 | -46.8 | -42.7 | -42.9 | -42.9 | -41.4 | -56.3 | -54.8 | -54.7 | -42.5 | -54.7 | -62.5 | -62.4 |
| #179     | 47.9 <sup>b</sup>  | 37.9  | 47.7  | 44.5  | 35.8  | 38.1  | 42.2  | 45.0  | 42.3  | 42.0  | 42.0  | 43.7  | 42.2  | 39.1  | 39.1  |
| #180     | 29.1 <sup>c</sup>  | 10.9  | 25.1  | 19.7  | 15.1  | 18.4  | 24.2  | 25.4  | 20.9  | 20.7  | 20.8  | 25.6  | 22.4  | 18.3  | 18.3  |
| #181     | 3.0 <sup>c</sup>   | -9.0  | -6.1  | -4.1  | -4.8  | -3.6  | -2.4  | -1.3  | -7.9  | -8.0  | -8.0  | -1.9  | -6.6  | -12.1 | -12.0 |
| #182     | 94.6 <sup>r</sup>  | 90.7  | 105.6 | 100.9 | 87.1  | 90.8  | 109.9 | 112.4 | 109.0 | 108.2 | 108.2 | 109.5 | 107.5 | 102.9 | 102.9 |
| #183     | 48.8 <sup>h</sup>  | 33.6  | 51.2  | 43.7  | 35.9  | 40.5  | 50.3  | 48.2  | 43.2  | 42.8  | 42.8  | 48.9  | 45.5  | 40.5  | 40.5  |
| #184     | 30.9 <sup>h</sup>  | 32.6  | 33.8  | 31.6  | 25.4  | 23.7  | 38.7  | 30.7  | 21.6  | 21.2  | 21.3  | 33.1  | 26.2  | 18.9  | 19.0  |
| #185     | 1.3 <sup>h</sup>   | -2.1  | 4.8   | 1.4   | -2.2  | -0.2  | -0.1  | 0.6   | -5.4  | -5.0  | -5.0  | 0.1   | -4.4  | -8.4  | -8.4  |
| #186     | -6.3 <sup>h</sup>  | -21.1 | -13.4 | -15.8 | -15.3 | -13.7 | -11.5 | -8.8  | -16.7 | -16.2 | -16.1 | -8.8  | -15.0 | -20.0 | -19.9 |
| #187     | -30.9 <sup>b</sup> | -32.3 | -37.3 | -33.9 | -31.4 | -30.8 | -30.8 | -31.7 | -42.7 | -41.6 | -41.6 | -31.9 | -40.5 | -46.6 | -46.6 |
| #188     | -32.7 <sup>b</sup> | -34.5 | -39.2 | -35.9 | -33.3 | -32.7 | -32.6 | -33.7 | -44.1 | -43.3 | -43.3 | -34.0 | -42.2 | -48.4 | -48.3 |
| #189     | -32.5 <sup>b</sup> | -35.2 | -39.3 | -35.9 | -33.5 | -32.6 | -32.6 | -33.7 | -43.9 | -43.1 | -43.1 | -34.1 | -42.1 | -48.3 | -48.2 |
| #190     | -31.9 <sup>b</sup> | -35.1 | -39.2 | -35.9 | -33.4 | -32.5 | -32.5 | -33.8 | -44.0 | -43.2 | -43.2 | -34.1 | -42.1 | -48.4 | -48.3 |
| #191     | -41.1 <sup>b</sup> | -34.4 | -46.3 | -40.4 | -38.1 | -37.9 | -35.5 | -38.2 | -52.1 | -50.4 | -50.3 | -38.1 | -49.6 | -56.4 | -56.3 |
| #192     | -43.0 <sup>b</sup> | -35.2 | -47.7 | -42.0 | -39.6 | -39.4 | -37.1 | -40.0 | -53.4 | -51.9 | -51.8 | -40.0 | -50.9 | -57.8 | -57.7 |
| #193     | -44.1 <sup>b</sup> | -37.6 | -48.8 | -42.7 | -40.7 | -40.3 | -38.3 | -40.7 | -53.8 | -52.4 | -52.4 | -41.1 | -51.5 | -58.5 | -58.5 |
| #194     | -42.2 <sup>b</sup> | -36.4 | -47.4 | -41.6 | -39.4 | -38.9 | -36.6 | -39.0 | -52.6 | -51.0 | -50.9 | -39.2 | -50.3 | -57.1 | -57.0 |
| #195     | -42.2 <sup>b</sup> | -36.6 | -47.4 | -41.6 | -39.3 | -38.9 | -36.6 | -39.0 | -52.6 | -51.1 | -51.0 | -39.3 | -50.3 | -57.2 | -57.1 |
| #196     | -44.1 <sup>b</sup> | -37.7 | -48.9 | -42.7 | -40.8 | -40.3 | -38.3 | -40.8 | -53.8 | -52.5 | -52.4 | -41.1 | -51.6 | -58.6 | -58.5 |
| #197     | -50.7 <sup>b</sup> | -38.8 | -54.0 | -48.5 | -47.2 | -46.7 | -41.8 | -47.5 | -62.7 | -61.1 | -61.0 | -47.3 | -59.7 | -67.5 | -67.4 |
| #198     | -49.4 <sup>d</sup> | -37.6 | -52.5 | -47.3 | -46.0 | -45.4 | -40.1 | -45.8 | -61.5 | -59.8 | -59.6 | -45.4 | -58.5 | -66.1 | -66.0 |
| #199     | -2.0 <sup>s</sup>  | 1.0   | 5.7   | 0.8   | -4.0  | -1.4  | 1.5   | -1.8  | -7.8  | -7.4  | -7.3  | -1.6  | -6.2  | -10.2 | -10.2 |
| #200     | -33.0 <sup>b</sup> | -30.0 | -36.9 | -36.0 | -33.9 | -32.8 | -29.8 | -35.1 | -45.9 | -45.0 | -44.9 | -34.4 | -43.0 | -49.2 | -49.1 |
| #201     | -43.2 <sup>b</sup> | -31.5 | -45.4 | -41.6 | -40.1 | -39.3 | -34.1 | -40.5 | -54.5 | -52.8 | -52.7 | -39.6 | -51.1 | -57.9 | -57.8 |
| #202     | 30.4 <sup>h</sup>  | 28.7  | 34.9  | 33.8  | 26.7  | 28.4  | 27.5  | 29.8  | 25.3  | 25.3  | 25.3  | 30.1  | 27.0  | 23.1  | 23.1  |
| #203     | 22.6 <sup>b</sup>  | 11.3  | 12.9  | 19.2  | 16.3  | 18.0  | 21.5  | 27.0  | 19.0  | 19.8  | 19.1  | 24.8  | 19.2  | 12.8  | 12.8  |
| #204     | 71.1 <sup>b</sup>  | 56.2  | 63.5  | 66.7  | 58.4  | 59.6  | 72.0  | 75.2  | 67.9  | 67.2  | 67.2  | 73.9  | 69.3  | 61.6  | 61.6  |
| #205     | 66.2 <sup>b</sup>  | 68.3  | 74.8  | 68.2  | 60.9  | 63.2  | 62.8  | 67.4  | 65.9  | 65.7  | 65.7  | 65.5  | 64.7  | 62.8  | 62.8  |
| #206     | 37.5 <sup>b</sup>  | 31.0  | 45.8  | 37.7  | 33.8  | 37.2  | 39.0  | 41.3  | 38.4  | 38.2  | 38.2  | 40.8  | 38.9  | 35.8  | 35.8  |
| #207     | 8.2 <sup>b</sup>   | -0.3  | 3.0   | 3.0   | 5.1   | 5.4   | 3.5   | 6.8   | 2.1   | 1.9   | 1.9   | 5.7   | 2.7   | -2.0  | -2.0  |
| #208     | -1.1 <sup>b</sup>  | -9.9  | -10.1 | -4.9  | -4.0  | -3.4  | -3.7  | 0.4   | -6.6  | -6.5  | 74.6  | -1.1  | -5.9  | -11.7 | -11.6 |
| #209     | -6.5 <sup>b</sup>  | -9.2  | -15.1 | -6.7  | -8.1  | -6.2  | -3.2  | 2.0   | -10.3 | -9.3  | -9.2  | -0.8  | -10.4 | -17.7 | -17.6 |
| #210     | 58.2 <sup>b</sup>  | 53.7  | 64.7  | 57.4  | 50.0  | 53.0  | 56.6  | 59.6  | 57.0  | 56.7  | 56.7  | 57.1  | 55.6  | 52.6  | 52.6  |
| #211     | 46.4 <sup>h</sup>  | 39.2  | 54.6  | 46.7  | 40.0  | 43.2  | 50.5  | 51.8  | 48.1  | 47.7  | 47.7  | 48.9  | 46.5  | 42.4  | 42.5  |
| #212     | 24.6 <sup>h</sup>  | 22.4  | 28.9  | 27.1  | 20.2  | 22.4  | 24.0  | 25.4  | 18.9  | 19.1  | 19.1  | 25.4  | 20.7  | 15.8  | 15.9  |
| #213     | 80.4 <sup>h</sup>  | 77.6  | 99.7  | 88.4  | 76.5  | 83.8  | 93.7  | 90.8  | 87.0  | 86.4  | 86.4  | 90.6  | 88.3  | 83.7  | 83.7  |
| #214     | -5.9 <sup>h</sup>  | -6.4  | 0.4   | -11.9 | -11.9 | -11.6 | 6.7   | -10.3 | -23.5 | -23.5 | -23.4 | -8.7  | -19.1 | -28.2 | -28.2 |
| #215     | -0.6 <sup>b</sup>  | -10.2 | -5.6  | -7.0  | -5.5  | -4.8  | -2.6  | -2.9  | -9.1  | -9.3  | -9.3  | -3.7  | -8.1  | -13.7 | -13.7 |
| #216     | 2.0 <sup>b</sup>   | -3.7  | -2.0  | -2.6  | -1.2  | -0.5  | -0.4  | -0.2  | -6.8  | -6.9  | -6.8  | -0.7  | -5.4  | -11.0 | -10.9 |
| #217     | 3.5 <sup>b</sup>   | -3.1  | -2.3  | -3.0  | -1.5  | -0.8  | -0.4  | -0.4  | -7.1  | -7.1  | -7.1  | -1.1  | -5.8  | -11.3 | -11.3 |
| #218     | -15.2 <sup>b</sup> | -21.4 | -23.5 | -18.9 | -17.9 | -17.7 | -13.4 | -13.6 | -24.3 | -23.9 | -23.9 | -14.5 | -22.5 | -30.1 | -30.0 |

. . . continued on next page . . .



Table S22: . . . continued from previous page . . .

| Molecule | Ref.               | MNDO  | AMI   | PM3   | PM6   | PM7   | OM1   |       | OM2   |       | OM3   |       | OM3   |       | D3T   |
|----------|--------------------|-------|-------|-------|-------|-------|-------|-------|-------|-------|-------|-------|-------|-------|-------|
|          |                    |       |       |       |       |       | D2    | D3    | D2    | D3    | D2    | D3    | D2    | D3    |       |
| #219     | 43.9 <sup>b</sup>  | 33.8  | 38.3  | 42.5  | 37.4  | 38.6  | 44.0  | 46.7  | 40.1  | 39.7  | 39.8  | 46.1  | 42.0  | 35.3  | 35.4  |
| #220     | 31.9 <sup>b</sup>  | 32.1  | 37.1  | 31.8  | 32.1  | 32.3  | 33.3  | 33.3  | 29.9  | 29.3  | 29.3  | 32.6  | 30.7  | 26.2  | 26.2  |
| #221     | 53.6 <sup>b</sup>  | 53.7  | 62.7  | 56.2  | 53.7  | 55.1  | 59.6  | 56.9  | 52.9  | 52.1  | 52.1  | 57.4  | 55.1  | 49.9  | 49.9  |
| #222     | 25.4 <sup>b</sup>  | 14.5  | 17.5  | 20.4  | 19.3  | 20.2  | 22.3  | 25.9  | 20.4  | 20.0  | 20.0  | 24.8  | 21.4  | 15.6  | 15.6  |
| #223     | 79.8 <sup>f</sup>  | 63.5  | 75.4  | 76.8  | 62.1  | 70.1  | 82.5  | 84.5  | 72.7  | 73.3  | 73.3  | 83.5  | 75.8  | 66.4  | 66.5  |
| #224     | 51.9 <sup>b</sup>  | 64.1  | 78.1  | 69.2  | 59.5  | 65.5  | 59.0  | 62.0  | 58.9  | 59.0  | 59.0  | 59.9  | 57.9  | 55.2  | 55.2  |
| #225     | 44.2 <sup>b</sup>  | 33.7  | 50.5  | 43.1  | 33.2  | 38.5  | 38.4  | 42.8  | 38.2  | 38.4  | 38.4  | 41.0  | 38.1  | 34.3  | 34.3  |
| #226     | 30.9 <sup>b</sup>  | 28.6  | 39.5  | 36.1  | 25.0  | 29.5  | 26.8  | 30.5  | 23.8  | 24.3  | 24.4  | 30.1  | 25.3  | 20.7  | 20.7  |
| #227     | 37.3 <sup>k</sup>  | 30.2  | 46.1  | 37.8  | 31.5  | 36.9  | 37.3  | 40.1  | 35.1  | 35.4  | 35.4  | 39.0  | 35.5  | 31.6  | 31.6  |
| #228     | -12.4 <sup>g</sup> | -10.4 | -14.4 | -13.7 | -10.6 | -9.3  | -10.8 | -12.5 | -22.5 | -21.6 | -21.5 | -12.4 | -19.7 | -26.3 | -26.3 |
| #229     | 58.6 <sup>c</sup>  | 62.9  | 67.7  | 58.8  | 57.0  | 59.2  | 59.6  | 51.8  | 45.1  | 44.8  | 44.9  | 52.1  | 48.1  | 41.1  | 41.1  |
| #230     | -23.6 <sup>c</sup> | -26.3 | -35.7 | -27.6 | -25.4 | -23.2 | -24.1 | -22.0 | -34.9 | -33.4 | -33.3 | -23.3 | -32.7 | -40.5 | -40.4 |
| #231     | -30.6 <sup>t</sup> | -16.4 | -23.5 | -28.0 | -28.2 | -24.9 | -16.8 | -29.9 | -44.6 | -43.2 | -43.1 | -27.9 | -39.4 | -47.6 | -47.5 |
| #232     | -25.7 <sup>t</sup> | -13.5 | -23.2 | -24.9 | -22.4 | -20.9 | -17.2 | -25.2 | -40.2 | -38.6 | -38.5 | -24.1 | -35.9 | -44.0 | -43.9 |
| #233     | 29.8 <sup>u</sup>  | 2.5   | 21.2  | 12.1  | 10.1  | 15.7  | 21.4  | 24.6  | 17.3  | 17.9  | 17.9  | 24.7  | 19.4  | 14.5  | 14.5  |
| #234     | -6.4 <sup>b</sup>  | -23.6 | -17.2 | -15.8 | -15.9 | -11.3 | -8.9  | -5.0  | -17.2 | -15.9 | -15.8 | -6.1  | -15.5 | -22.4 | -22.4 |
| #235     | -22.2 <sup>c</sup> | -36.4 | -37.5 | -31.6 | -27.8 | -25.1 | -28.6 | -26.1 | -37.7 | -36.8 | -36.8 | -27.1 | -35.9 | -43.3 | -43.2 |
| #236     | -15.9 <sup>c</sup> | -21.6 | -23.4 | -18.8 | -17.1 | -15.0 | -16.4 | -14.1 | -25.8 | -24.8 | -24.8 | -15.5 | -24.3 | -31.6 | -31.6 |
| #237     | -30.4 <sup>b</sup> | -37.9 | -44.4 | -36.0 | -33.2 | -30.9 | -32.0 | -29.1 | -44.0 | -42.4 | -42.3 | -30.4 | -42.0 | -50.2 | -50.1 |
| #238     | -31.4 <sup>b</sup> | -34.0 | -41.5 | -31.9 | -30.5 | -28.1 | -28.6 | -25.3 | -39.7 | -38.3 | -38.2 | -26.8 | -37.9 | -46.2 | -46.1 |
| #239     | -40.4 <sup>c</sup> | -40.4 | -54.1 | -42.7 | -40.3 | -38.4 | -37.1 | -35.9 | -53.9 | -51.6 | -51.5 | -37.0 | -51.5 | -60.3 | -60.2 |
| #240     | -43.5 <sup>c</sup> | -41.8 | -56.3 | -44.5 | -42.3 | -40.4 | -39.7 | -38.5 | -55.7 | -53.7 | -53.6 | -39.8 | -53.4 | -62.4 | -62.3 |
| #241     | 148.7 <sup>b</sup> | 99.1  | 151.2 | 113.8 | 106.5 | 125.6 | 147.6 | 144.6 | 136.6 | 137.2 | 137.2 | 146.4 | 141.3 | 134.8 | 134.8 |
| #242     | -31.9 <sup>c</sup> | -26.4 | -43.2 | -34.6 | -33.2 | -28.6 | -26.2 | -30.4 | -48.4 | -45.8 | -45.6 | -30.2 | -43.7 | -53.3 | -53.1 |
| #243     | -34.9 <sup>v</sup> | -22.6 | -48.7 | -38.5 | -39.9 | -32.1 | -23.4 | -35.3 | -63.0 | -58.6 | -58.3 | -33.5 | -54.2 | -67.9 | -67.6 |
| #244     | 9.1 <sup>b</sup>   | 2.0   | 8.6   | 8.1   | 5.1   | 9.0   | 5.3   | 8.9   | 1.7   | 2.3   | 2.3   | 7.6   | 2.7   | -2.6  | -2.6  |
| #245     | 0.3 <sup>b</sup>   | -5.8  | -1.6  | 1.2   | -2.9  | 1.4   | -0.5  | 4.3   | -5.5  | -4.4  | -4.4  | 2.4   | -4.8  | -10.9 | -10.9 |
| #246     | -3.9 <sup>b</sup>  | -5.5  | -4.6  | -0.0  | -4.9  | -0.4  | -0.3  | 5.5   | -7.1  | -5.5  | -5.4  | 2.9   | -6.9  | -13.5 | -13.4 |
| #247     | -7.4 <sup>b</sup>  | -5.4  | -7.5  | -3.1  | -8.0  | -2.8  | -0.8  | 5.1   | -9.9  | -8.1  | -8.0  | 1.9   | -10.2 | -17.7 | -17.6 |
| #248     | 49.6 <sup>u</sup>  | 58.3  | 83.0  | 68.3  | 58.9  | 68.9  | 64.2  | 63.5  | 58.3  | 58.7  | 58.7  | 61.2  | 57.4  | 53.6  | 53.7  |
| #249     | 15.3 <sup>u</sup>  | 19.3  | 29.0  | 21.2  | 19.6  | 23.8  | 22.5  | 20.5  | 13.0  | 13.6  | 13.6  | 20.1  | 14.6  | 9.4   | 9.4   |
| #250     | -36.9 <sup>c</sup> | -35.0 | -54.9 | -45.0 | -40.8 | -40.2 | -34.6 | -28.5 | -47.0 | -45.2 | -45.0 | -32.2 | -48.4 | -56.7 | -56.5 |
| #251     | -54.6 <sup>c</sup> | -43.4 | -70.8 | -57.4 | -51.4 | -53.1 | -46.4 | -39.8 | -62.8 | -60.7 | -60.5 | -43.4 | -63.5 | -73.5 | -73.3 |
| #252     | -37.0 <sup>c</sup> | -36.2 | -43.7 | -36.9 | -34.2 | -33.9 | -34.7 | -33.9 | -44.8 | -43.7 | -43.7 | -34.8 | -43.3 | -49.6 | -49.5 |
| #253     | -20.5 <sup>c</sup> | -17.7 | -32.5 | -25.1 | -24.2 | -19.9 | -17.9 | -21.1 | -38.9 | -36.4 | -36.3 | -21.2 | -34.7 | -44.1 | -43.9 |
| #254     | -56.2 <sup>w</sup> | 32.6  | -33.3 | -49.9 | -52.2 | -49.5 | -10.0 | -49.7 | -80.6 | -76.3 | -75.9 | -41.3 | -70.1 | -79.7 | -79.2 |
| #b01     | 0.0 <sup>a</sup>   | 8.3   | 11.2  | 17.6  | 40.6  | 33.0  | -4.4  | 2.8   | 2.8   | 2.6   | 2.6   | 2.6   | 2.6   | 2.2   | 2.2   |
| #b02     | -11.0 <sup>x</sup> | -6.4  | -7.3  | -3.1  | -3.1  | -4.3  | -3.8  | -5.9  | -6.1  | -6.3  | -6.3  | -11.2 | -11.3 | -12.0 | -12.0 |
| #b03     | -5.5 <sup>b</sup>  | -7.5  | -7.4  | -5.2  | -2.4  | -3.4  | -4.7  | -4.1  | -5.3  | -5.6  | -5.6  | -5.8  | -6.6  | -8.1  | -8.1  |
| #b04     | -11.3 <sup>b</sup> | -13.6 | -13.5 | -11.2 | -8.4  | -9.0  | -10.3 | -8.6  | -11.2 | -11.3 | -11.3 | -11.1 | -13.1 | -15.5 | -15.5 |
| #b05     | -16.8 <sup>b</sup> | -18.3 | -20.4 | -16.5 | -13.5 | -14.2 | -15.6 | -13.5 | -17.7 | -17.7 | -17.7 | -16.1 | -19.5 | -22.7 | -22.7 |
| #b06     | -22.7 <sup>c</sup> | -23.0 | -27.2 | -21.9 | -18.4 | -19.1 | -20.8 | -18.0 | -23.8 | -23.7 | -23.7 | -20.9 | -25.6 | -29.7 | -29.7 |
| #b07     | -4.4 <sup>b</sup>  | -6.6  | -5.6  | -7.9  | -3.1  | -4.2  | -4.7  | -5.1  | -7.7  | -7.9  | -7.9  | -2.2  | -4.3  | -6.5  | -6.5  |
| #b08     | -5.7 <sup>c</sup>  | -2.8  | -1.7  | -10.9 | -4.4  | -6.2  | -3.5  | -8.0  | -12.4 | -12.4 | -12.4 | -0.1  | -3.8  | -6.7  | -6.7  |

. . . continued on next page . . .

Table S22: . . . continued from previous page . . .

| Molecule | Ref.               | MNDO  | AMI   | PM3   | PM6   | PM7   | OM1   | OM2   |       | OM3   |       | D3T   |
|----------|--------------------|-------|-------|-------|-------|-------|-------|-------|-------|-------|-------|-------|
|          |                    |       |       |       |       |       |       | D2    | D3    | D2    | D3    |       |
| #b09     | -20.0 <sup>c</sup> | -16.4 | -17.5 | -17.3 | -15.5 | -15.3 | -14.2 | -14.5 | -19.0 | -18.9 | -17.4 | -24.2 |
| #b10     | -25.4 <sup>c</sup> | -20.3 | -25.6 | -23.2 | -22.2 | -21.8 | -18.0 | -19.4 | -25.7 | -25.5 | -22.7 | -32.0 |
| #b11     | -28.9 <sup>c</sup> | -15.5 | -21.3 | -25.2 | -26.1 | -24.2 | -14.7 | -22.3 | -29.1 | -28.7 | -24.6 | -34.3 |
| #b12     | -17.8              | -17.8 | -17.9 | -19.6 | -15.8 | -15.8 | -16.2 | -14.7 | -20.2 | -20.3 | -13.8 | -22.3 |
| #b13     | -22.1 <sup>c</sup> | -14.7 | -16.3 | -26.6 | -18.9 | -20.4 | -16.9 | -18.0 | -27.9 | -27.6 | -14.9 | -29.4 |
| #b14     | -34.4 <sup>e</sup> | -20.4 | -25.6 | -32.0 | -32.4 | -30.7 | -20.7 | -25.3 | -35.4 | -34.9 | -25.2 | -39.3 |
| #b15     | 32.3 <sup>y</sup>  | 35.3  | 31.0  | 33.0  | 33.2  | 29.8  | 24.5  | 26.1  | 25.9  | 25.7  | 25.3  | 24.7  |
| #b16     | 17.7 <sup>z</sup>  | 19.2  | 19.3  | 23.3  | 20.5  | 18.2  | 16.5  | 17.5  | 16.5  | 16.2  | 15.3  | 13.2  |
| #b17     | 12.3 <sup>c</sup>  | 13.8  | 13.0  | 18.5  | 16.0  | 13.6  | 10.8  | 12.3  | 9.9   | 9.6   | 10.2  | 8.6   |
| #b18     | 8.1 <sup>c</sup>   | 8.9   | 6.1   | 13.1  | 10.8  | 8.4   | 5.3   | 7.5   | 3.4   | 3.3   | 5.3   | 2.3   |
| #b19     | 5.6 <sup>c</sup>   | 11.3  | 8.5   | 13.4  | 10.0  | 8.0   | 6.9   | 5.1   | 0.9   | 0.7   | 3.5   | 0.4   |
| #b20     | 73.3 <sup>c</sup>  | 66.6  | 67.9  | 77.5  | 74.2  | 71.5  | 72.3  | 74.8  | 74.3  | 73.9  | 68.2  | 66.7  |
| #b21     | 63.6 <sup>a1</sup> | 55.6  | 54.3  | 64.4  | 59.9  | 57.7  | 53.2  | 56.6  | 54.9  | 54.4  | 51.7  | 50.8  |
| #b22     | 43.2 <sup>c</sup>  | 43.8  | 45.0  | 50.2  | 46.0  | 43.8  | 43.3  | 45.6  | 44.2  | 43.6  | 43.7  | 40.5  |
| #b23     | 81.3 <sup>b</sup>  | 74.7  | 76.0  | 86.0  | 79.7  | 77.6  | 76.4  | 79.7  | 77.6  | 76.9  | 75.2  | 74.0  |
| #b24     | 124.4 <sup>b</sup> | 110.5 | 113.3 | 126.9 | 119.3 | 116.8 | 118.7 | 119.1 | 116.1 | 115.1 | 111.4 | 109.7 |
| #b25     | 127.5 <sup>y</sup> | 111.4 | 119.8 | 128.1 | 128.2 | 126.6 | 134.8 | 138.0 | 136.8 | 136.1 | 128.3 | 125.3 |
| #b26     | 22.8 <sup>y</sup>  | 14.2  | 13.7  | 20.7  | 15.2  | 15.3  | 16.1  | 18.5  | 17.7  | 17.4  | 16.5  | 14.7  |
| #b27     | 22.6 <sup>b</sup>  | 14.4  | 17.3  | 17.9  | 14.1  | 14.4  | 15.8  | 18.2  | 16.2  | 15.8  | 20.1  | 18.5  |
| #b28     | 22.0 <sup>c</sup>  | 15.1  | 24.0  | 16.4  | 14.4  | 15.2  | 15.4  | 17.5  | 14.3  | 13.9  | 23.2  | 20.4  |
| #b29     | 20.1 <sup>c</sup>  | 18.1  | 24.0  | 15.1  | 12.5  | 12.8  | 17.7  | 14.8  | 11.1  | 10.8  | 27.0  | 18.2  |
| #b30     | 58.0 <sup>e</sup>  | 46.2  | 57.8  | 57.0  | 56.0  | 50.9  | 51.3  | 55.7  | 54.0  | 53.4  | 55.7  | 54.6  |
| #b31     | 64.7 <sup>c</sup>  | 47.8  | 88.6  | 62.2  | 54.5  | 51.2  | 46.9  | 55.2  | 48.0  | 47.0  | 74.0  | 61.9  |
| #b32     | 99.5 <sup>f</sup>  | 92.9  | 101.8 | 95.9  | 94.3  | 94.7  | 94.2  | 91.3  | 83.9  | 82.6  | 93.0  | 88.2  |
| #b33     | 67.0 <sup>e</sup>  | 67.3  | 77.6  | 70.6  | 69.4  | 68.5  | 68.2  | 67.0  | 65.7  | 65.1  | 67.8  | 66.9  |
| #b34     | 39.1 <sup>c</sup>  | 60.3  | 50.4  | 54.7  | 45.5  | 38.9  | 27.8  | 38.3  | 37.3  | 36.9  | 26.7  | 26.1  |
| #b35     | 36.0 <sup>e</sup>  | 31.8  | 31.5  | 37.8  | 48.2  | 43.5  | 31.2  | 37.2  | 36.9  | 36.6  | 26.4  | 25.4  |
| #b36     | 8.6 <sup>c</sup>   | 2.6   | 14.7  | 5.8   | 8.4   | 6.7   | 6.4   | 4.6   | -4.4  | -4.8  | 6.0   | -1.4  |
| #b37     | -4.1 <sup>f</sup>  | -7.3  | -9.4  | -4.0  | -1.0  | -0.3  | -1.3  | 3.4   | -0.2  | -0.5  | -1.6  | -4.5  |
| #b38     | 16.0 <sup>b1</sup> | 19.7  | 18.7  | 21.1  | 27.0  | 22.8  | 17.9  | 20.9  | 20.4  | 20.0  | 16.1  | 15.7  |
| #b39     | 8.0 <sup>e</sup>   | 12.6  | 18.7  | 13.3  | 16.4  | 12.8  | 19.8  | 31.9  | 29.8  | 29.2  | 20.8  | 19.2  |
| #b40     | 30.2 <sup>c</sup>  | 25.1  | 33.1  | 31.6  | 29.6  | 32.3  | 30.6  | 36.3  | 34.5  | 34.3  | 35.4  | 34.3  |
| #b41     | -0.8 <sup>c</sup>  | -15.8 | -10.4 | -12.0 | -7.9  | -5.6  | -5.1  | 0.0   | -5.3  | -5.3  | 0.4   | -3.5  |
| #b42     | -11.3 <sup>c</sup> | -19.0 | -19.0 | -16.5 | -11.1 | -9.2  | -12.1 | -6.6  | -14.4 | -14.0 | -6.3  | -12.2 |
| #b43     | 52.8 <sup>e</sup>  | 51.5  | 59.0  | 56.4  | 52.5  | 55.9  | 58.0  | 58.2  | 49.7  | 49.7  | 59.3  | 52.7  |
| #b44     | 36.9 <sup>e</sup>  | 47.9  | 49.7  | 50.1  | 45.9  | 49.1  | 52.1  | 51.0  | 40.5  | 40.9  | 52.3  | 44.1  |
| #b45     | 63.9 <sup>c1</sup> | 72.4  | 86.8  | 91.7  | 96.1  | 93.9  | 75.8  | 87.4  | 86.8  | 86.4  | 80.2  | 79.8  |
| #b46     | 25.9 <sup>e</sup>  | 32.5  | 39.9  | 27.1  | 25.8  | 26.5  | 37.2  | 33.7  | 31.0  | 30.2  | 32.0  | 30.5  |
| #b47     | 80.0 <sup>c</sup>  | 53.8  | 109.6 | 86.2  | 80.4  | 75.0  | 75.6  | 70.7  | 69.3  | 68.3  | 73.5  | 72.8  |
| #b48     | 44.1 <sup>f</sup>  | 47.9  | 46.3  | 47.1  | 44.6  | 43.6  | 53.2  | 45.1  | 32.9  | 31.4  | 44.1  | 36.3  |
| #b49     | 12.3 <sup>c</sup>  | 0.4   | 6.3   | 5.5   | 10.4  | 7.6   | 2.5   | 8.0   | -0.4  | -0.7  | 9.3   | 2.2   |
| #b50     | 33.5 <sup>c</sup>  | 28.8  | 32.0  | 30.4  | 33.9  | 31.7  | 33.0  | 30.8  | 27.1  | 26.3  | 29.4  | 27.6  |
| #b51     | 66.5 <sup>c</sup>  | 43.6  | 55.3  | 56.0  | 55.2  | 53.2  | 58.2  | 48.4  | 45.2  | 44.3  | 51.1  | 49.5  |
| #b52     | 46.8 <sup>c</sup>  | 35.0  | 43.9  | 38.0  | 45.1  | 40.2  | 47.3  | 44.5  | 41.4  | 40.4  | 41.9  | 40.4  |
| #b53     | 46.9 <sup>c</sup>  | 37.8  | 44.2  | 39.3  | 47.6  | 44.3  | 51.7  | 44.9  | 41.9  | 40.9  | 42.0  | 40.4  |

. . . continued on next page . . .

Table S22: . . . continued from previous page . . .

| Molecule | Ref.               | MNDO  | AMI   | PM3   | PM6   | PM7   | OM1   |       | OM2   |       | OM3   |       | OM3   |       | D3T |
|----------|--------------------|-------|-------|-------|-------|-------|-------|-------|-------|-------|-------|-------|-------|-------|-----|
|          |                    |       |       |       |       |       | D2    | D3    | D2    | D3    | D2    | D3    | D2    | D3    |     |
| #b54     | 23.7 <sup>c</sup>  | 19.9  | 25.6  | 21.2  | 23.2  | 21.7  | 27.2  | 22.6  | 17.5  | 16.6  | 16.6  | 20.9  | 17.8  | 11.5  |     |
| #b55     | 25.4 <sup>c</sup>  | 20.5  | 24.1  | 20.9  | 24.4  | 22.1  | 27.7  | 21.2  | 16.0  | 15.2  | 15.2  | 20.3  | 17.1  | 10.8  |     |
| #b56     | 24.8 <sup>c</sup>  | 20.9  | 24.2  | 20.8  | 23.0  | 21.3  | 27.7  | 21.2  | 16.0  | 15.1  | 15.1  | 20.4  | 17.2  | 10.9  |     |
| #b57     | 16.3 <sup>b</sup>  | 13.5  | 18.4  | 12.6  | 14.9  | 12.8  | 22.8  | 13.4  | 6.2   | 5.5   | 5.5   | 12.3  | 7.4   | 0.1   |     |
| #b58     | 15.3 <sup>b</sup>  | 12.0  | 17.8  | 11.6  | 12.1  | 11.3  | 21.9  | 13.1  | 6.3   | 5.4   | 5.5   | 11.9  | 7.4   | 0.1   |     |
| #b59     | 15.9 <sup>b</sup>  | 11.4  | 17.7  | 11.7  | 14.1  | 12.3  | 22.0  | 13.3  | 6.5   | 5.6   | 5.7   | 11.9  | 7.5   | 0.2   |     |
| #b60     | 14.0 <sup>b</sup>  | 11.0  | 19.5  | 12.1  | 12.3  | 11.7  | 21.4  | 14.5  | 7.8   | 6.9   | 6.9   | 12.4  | 8.1   | 0.7   |     |
| #b61     | 16.7 <sup>b</sup>  | 14.8  | 16.7  | 12.5  | 14.9  | 12.4  | 23.2  | 11.8  | 4.4   | 3.8   | 3.8   | 11.7  | 6.7   | -0.5  |     |
| #b62     | 17.4 <sup>b</sup>  | 12.2  | 16.2  | 11.3  | 14.6  | 12.3  | 22.5  | 11.7  | 4.8   | 4.0   | 4.0   | 11.1  | 6.6   | -0.7  |     |
| #b63     | 80.2 <sup>f</sup>  | 64.0  | 104.2 | 85.4  | 78.9  | 79.8  | 85.4  | 76.8  | 71.2  | 69.9  | 69.9  | 77.9  | 74.9  | 67.0  |     |
| #b64     | 37.4 <sup>c</sup>  | 44.2  | 55.2  | 42.4  | 41.0  | 42.7  | 54.8  | 48.5  | 41.8  | 40.6  | 40.6  | 47.0  | 43.3  | 34.8  |     |
| #b65     | 20.8 <sup>c</sup>  | 21.7  | 20.5  | 21.3  | 21.4  | 21.2  | 25.6  | 25.2  | 19.9  | 19.0  | 19.0  | 22.3  | 19.2  | 12.7  |     |
| #b66     | 51.5 <sup>c</sup>  | 52.0  | 53.4  | 58.5  | 55.3  | 53.5  | 51.1  | 49.7  | 44.7  | 43.7  | 43.7  | 48.0  | 45.3  | 38.6  |     |
| #b67     | 48.5 <sup>c</sup>  | 45.3  | 46.7  | 47.6  | 41.8  | 43.7  | 46.9  | 47.9  | 41.5  | 40.5  | 40.5  | 48.9  | 44.7  | 37.5  |     |
| #b68     | 9.8 <sup>c</sup>   | -6.4  | 0.2   | -0.9  | -1.4  | 2.4   | 8.1   | 11.9  | 6.5   | 6.6   | 6.7   | 8.4   | 4.3   | 0.4   |     |
| #b69     | -13.1 <sup>c</sup> | -22.5 | -22.7 | -17.8 | -14.9 | -12.8 | -15.0 | -9.9  | -17.3 | -17.0 | -17.0 | -13.8 | -19.3 | -24.6 |     |
| #b70     | -25.1 <sup>c</sup> | -25.7 | -31.9 | -24.6 | -22.3 | -20.4 | -20.8 | -17.3 | -27.4 | -26.6 | -26.5 | -21.2 | -29.1 | -35.1 |     |
| #b71     | 18.4 <sup>f</sup>  | 14.6  | 20.5  | 19.9  | 17.1  | 20.3  | 17.3  | 22.4  | 19.1  | 19.0  | 19.0  | 19.3  | 17.0  | 14.0  |     |
| #b72     | -1.0 <sup>c</sup>  | -3.6  | -8.2  | -13.1 | -11.4 | -7.2  | 3.9   | 2.3   | -9.6  | -8.5  | -8.5  | 7.3   | -1.6  | -9.1  |     |
| #b73     | -20.2 <sup>c</sup> | -21.5 | -23.1 | -22.6 | -18.4 | -16.1 | -16.2 | -13.3 | -23.1 | -22.5 | -22.4 | -13.3 | -21.0 | -27.0 |     |
| #b74     | 47.9 <sup>d1</sup> | 44.7  | 52.2  | 47.5  | 50.7  | 49.7  | 55.7  | 48.7  | 41.0  | 39.7  | 39.7  | 48.0  | 43.8  | 34.1  |     |
| #b75     | 48.9 <sup>d1</sup> | 45.3  | 50.2  | 47.2  | 50.1  | 48.6  | 55.5  | 46.9  | 39.1  | 37.9  | 37.9  | 46.7  | 42.3  | 32.7  |     |
| #b76     | 57.4 <sup>e1</sup> | 52.8  | 65.6  | 56.2  | 64.8  | 63.1  | 73.6  | 64.7  | 57.7  | 56.3  | 56.3  | 61.9  | 58.1  | 48.8  |     |
| #b77     | 65.5 <sup>f1</sup> | 64.8  | 77.2  | 69.4  | 71.1  | 71.7  | 83.9  | 71.7  | 59.9  | 58.2  | 58.2  | 71.6  | 64.9  | 50.9  |     |
| #b78     | 80.9 <sup>g1</sup> | 71.8  | 93.0  | 78.9  | 85.6  | 86.2  | 102.4 | 90.1  | 79.2  | 77.3  | 77.3  | 87.1  | 80.9  | 67.4  |     |
| #b79     | 57.5 <sup>d1</sup> | 60.7  | 68.0  | 61.1  | 64.8  | 64.2  | 74.1  | 60.3  | 48.1  | 46.5  | 46.5  | 61.0  | 53.9  | 39.9  |     |
| #b80     | 55.9 <sup>b1</sup> | 61.6  | 69.2  | 62.1  | 64.7  | 64.6  | 75.6  | 60.6  | 48.4  | 46.8  | 46.8  | 61.2  | 54.0  | 40.0  |     |
| #b81     | 59.9 <sup>f1</sup> | 60.0  | 68.3  | 62.6  | 64.4  | 64.0  | 73.5  | 59.3  | 47.3  | 45.6  | 45.6  | 59.8  | 52.8  | 38.8  |     |
| #b82     | 50.1 <sup>e1</sup> | 53.6  | 67.8  | 53.9  | 53.3  | 56.1  | 68.5  | 58.7  | 47.8  | 46.3  | 46.3  | 57.6  | 51.4  | 38.6  |     |
| #b83     | 43.4 <sup>j1</sup> | 45.9  | 67.1  | 47.7  | 51.1  | 51.5  | 63.8  | 57.5  | 51.4  | 50.2  | 50.2  | 56.6  | 53.2  | 45.1  |     |
| #b84     | 58.1 <sup>j1</sup> | 58.1  | 82.3  | 65.3  | 60.1  | 63.1  | 73.1  | 64.4  | 58.3  | 57.0  | 57.0  | 65.5  | 62.2  | 54.0  |     |
| #b85     | 42.9 <sup>j1</sup> | 45.4  | 65.6  | 48.8  | 42.8  | 44.8  | 53.9  | 47.8  | 45.5  | 44.6  | 44.6  | 49.3  | 48.1  | 44.3  |     |
| #b86     | 31.8 <sup>j1</sup> | 33.3  | 50.8  | 31.3  | 34.0  | 33.2  | 46.1  | 40.0  | 37.7  | 36.9  | 36.9  | 39.7  | 38.4  | 34.6  |     |
| #b87     | 24.6 <sup>f</sup>  | 32.3  | 44.4  | 25.9  | 25.0  | 25.7  | 35.5  | 31.1  | 26.8  | 26.0  | 26.0  | 33.5  | 30.6  | 25.6  |     |
| #b88     | 18.5 <sup>c</sup>  | 16.4  | 17.4  | 14.6  | 20.6  | 16.1  | 16.1  | 14.8  | 13.2  | 12.8  | 12.8  | 15.6  | 14.4  | 12.4  |     |
| #b89     | 60.6 <sup>c</sup>  | 67.9  | 73.7  | 69.3  | 72.7  | 70.2  | 70.6  | 68.3  | 56.8  | 55.0  | 54.9  | 67.7  | 60.8  | 47.4  |     |
| #c01     | -57.8 <sup>d</sup> | -60.9 | -59.2 | -53.4 | -54.3 | -57.8 | -56.7 | -56.5 | -56.6 | -56.7 | -56.7 | -58.5 | -58.5 | -58.8 |     |
| #c02     | -48.1 <sup>b</sup> | -57.4 | -57.0 | -51.9 | -48.3 | -48.9 | -51.0 | -49.3 | -50.2 | -50.3 | -50.3 | -49.8 | -50.4 | -51.4 |     |
| #c03     | -56.2 <sup>b</sup> | -63.0 | -62.7 | -56.9 | -54.9 | -55.9 | -59.5 | -56.9 | -59.0 | -59.1 | -59.1 | -57.2 | -58.8 | -60.8 |     |
| #c04     | -61.2 <sup>b</sup> | -67.7 | -69.5 | -62.2 | -60.1 | -61.1 | -64.9 | -61.9 | -65.6 | -65.6 | -65.6 | -62.2 | -65.1 | -67.9 |     |
| #c05     | -65.8 <sup>b</sup> | -72.4 | -76.3 | -67.6 | -64.9 | -66.0 | -70.1 | -66.4 | -71.8 | -71.6 | -71.6 | -66.9 | -71.2 | -74.8 |     |
| #c06     | -70.7 <sup>b</sup> | -77.1 | -83.2 | -73.0 | -70.0 | -71.1 | -75.2 | -71.0 | -78.0 | -77.6 | -77.6 | -71.8 | -77.4 | -81.9 |     |
| #c07     | -75.7 <sup>b</sup> | -81.8 | -90.0 | -78.4 | -75.0 | -76.2 | -80.4 | -75.5 | -84.2 | -83.7 | -83.7 | -76.6 | -83.6 | -89.0 |     |
| #c08     | -79.1 <sup>b</sup> | -86.6 | -96.9 | -83.8 | -80.0 | -81.3 | -85.5 | -80.1 | -90.4 | -89.8 | -89.8 | -81.5 | -89.8 | -96.1 |     |

. . . continued on next page . . .



Table S22: . . . continued from previous page . . .

| Molecule | Ref.                | MNDO   | AMI    | PM3    | PM6    | PM7    | OM1    |        | OM2    |        | OM3    |        | D3T    |
|----------|---------------------|--------|--------|--------|--------|--------|--------|--------|--------|--------|--------|--------|--------|
|          |                     |        |        |        |        |        | D2     | D3     | D2     | D3     | D2     | D3     |        |
| #c53     | -60.3 <sup>b</sup>  | -62.0  | -64.4  | -57.4  | -58.5  | -58.9  | -61.4  | -61.1  | -65.9  | -65.9  | -58.4  | -62.2  | -65.7  |
| #c54     | -69.8 <sup>b</sup>  | -71.4  | -78.0  | -68.1  | -68.9  | -69.3  | -72.2  | -71.1  | -79.2  | -78.9  | -68.1  | -74.6  | -79.9  |
| #c55     | -79.8 <sup>b</sup>  | -80.9  | -91.6  | -78.8  | -78.6  | -79.1  | -82.5  | -80.1  | -91.4  | -90.9  | -77.7  | -86.9  | -93.9  |
| #c56     | -76.2 <sup>b</sup>  | -64.8  | -72.3  | -69.4  | -76.1  | -75.8  | -70.7  | -77.7  | -86.7  | -86.3  | -74.1  | -81.7  | -86.8  |
| #c57     | -86.3 <sup>b</sup>  | -71.7  | -82.9  | -77.4  | -82.3  | -83.7  | -79.3  | -84.8  | -98.5  | -97.6  | -80.9  | -92.5  | -99.3  |
| #c58     | -86.5 <sup>c</sup>  | -51.6  | -71.4  | -78.0  | -90.9  | -88.5  | -69.7  | -92.3  | -107.2 | -105.9 | -85.1  | -98.5  | -104.9 |
| #c59     | -51.7 <sup>b</sup>  | -56.6  | -58.8  | -52.9  | -52.2  | -51.9  | -52.6  | -53.4  | -56.8  | -56.8  | -50.6  | -53.3  | -56.0  |
| #c60     | -56.8 <sup>b</sup>  | -61.3  | -65.6  | -58.2  | -57.3  | -57.1  | -58.0  | -58.4  | -63.4  | -63.3  | -55.5  | -59.5  | -63.0  |
| #c61     | -60.2 <sup>b</sup>  | -58.2  | -62.8  | -58.7  | -60.9  | -60.2  | -57.4  | -61.7  | -67.1  | -66.9  | -58.6  | -63.1  | -66.5  |
| #c62     | -67.7 <sup>c</sup>  | -54.6  | -64.8  | -64.4  | -69.8  | -68.2  | -59.1  | -70.5  | -78.5  | -77.9  | -66.1  | -73.0  | -77.2  |
| #c63     | -85.6 <sup>d</sup>  | -60.4  | -73.6  | -74.7  | -84.7  | -83.7  | -72.0  | -86.6  | -98.4  | -97.6  | -81.4  | -91.7  | -97.6  |
| #c64     | -83.3 <sup>b</sup>  | -89.9  | -103.3 | -87.4  | -88.6  | -84.0  | -78.2  | -79.9  | -83.7  | -83.7  | -71.4  | -74.6  | -77.3  |
| #c65     | -93.3 <sup>b</sup>  | -91.2  | -103.0 | -94.7  | -98.1  | -93.5  | -89.8  | -91.6  | -98.2  | -97.7  | -83.3  | -88.9  | -92.5  |
| #c66     | -121.1 <sup>c</sup> | -103.8 | -114.9 | -108.9 | -119.2 | -120.8 | -110.0 | -120.7 | -135.0 | -131.4 | -111.0 | -115.5 | -126.9 |
| #c67     | -3.3 <sup>b</sup>   | -3.5   | 2.1    | 0.8    | -5.2   | -5.7   | -0.8   | 4.5    | 1.8    | 1.2    | 4.6    | 2.7    | -0.6   |
| #c68     | -33.6 <sup>b</sup>  | -32.8  | -31.3  | -28.3  | -32.8  | -33.1  | -31.4  | -28.2  | -32.0  | -32.3  | -26.8  | -29.6  | -33.1  |
| #c69     | -12.6 <sup>b</sup>  | -15.5  | -9.0   | -8.1   | -10.1  | -11.3  | -15.7  | -13.3  | -14.6  | -14.8  | -8.8   | -9.7   | -11.2  |
| #c70     | -22.6 <sup>b</sup>  | -23.0  | -15.7  | -16.6  | -19.5  | -20.3  | -22.2  | -21.2  | -24.0  | -24.0  | -17.1  | -19.0  | -21.5  |
| #c71     | -19.2 <sup>c</sup>  | -37.2  | -25.5  | -26.7  | -29.1  | -25.4  | -21.8  | -17.7  | -20.6  | -20.6  | -15.8  | -17.9  | -20.5  |
| #c72     | -44.0 <sup>c</sup>  | -59.3  | -58.4  | -51.3  | -51.4  | -49.0  | -50.1  | -47.9  | -52.6  | -52.5  | -46.3  | -49.5  | -53.5  |
| #c73     | -53.4 <sup>c</sup>  | -62.0  | -67.1  | -57.4  | -58.4  | -56.0  | -54.6  | -53.1  | -60.2  | -59.7  | -51.7  | -57.0  | -61.8  |
| #c74     | -71.2 <sup>c</sup>  | -93.0  | -93.8  | -82.5  | -83.0  | -78.5  | -76.0  | -78.5  | -81.8  | -82.0  | -70.8  | -73.1  | -76.2  |
| #c75     | -75.5 <sup>b</sup>  | -89.2  | -95.0  | -83.1  | -85.6  | -82.1  | -75.1  | -76.5  | -82.1  | -81.8  | -72.4  | -76.4  | -80.5  |
| #c76     | -83.7 <sup>b</sup>  | -94.3  | -101.9 | -87.8  | -91.4  | -86.6  | -80.9  | -82.9  | -88.6  | -88.3  | -75.9  | -80.0  | -84.1  |
| #c77     | -95.4 <sup>b</sup>  | -97.9  | -104.6 | -92.3  | -99.8  | -95.9  | -91.2  | -95.0  | -102.2 | -101.8 | -87.6  | -93.0  | -98.0  |
| #c78     | -90.5 <sup>b</sup>  | -97.0  | -105.9 | -92.9  | -99.2  | -94.5  | -88.1  | -92.6  | -100.1 | -99.6  | -85.0  | -90.6  | -95.6  |
| #c79     | -102.3 <sup>b</sup> | -100.7 | -108.6 | -97.3  | -107.5 | -103.8 | -98.2  | -104.6 | -113.6 | -113.1 | -96.5  | -103.5 | -109.4 |
| #c80     | -98.2 <sup>b</sup>  | -97.9  | -110.7 | -98.4  | -105.0 | -100.7 | -91.9  | -99.7  | -109.4 | -108.7 | -90.8  | -98.7  | -104.3 |
| #c81     | -100.7 <sup>b</sup> | -93.6  | -109.9 | -99.1  | -103.9 | -99.1  | -86.9  | -98.2  | -108.6 | -107.5 | -88.6  | -97.1  | -102.6 |
| #c82     | -106.8 <sup>b</sup> | -102.1 | -112.2 | -102.9 | -116.2 | -112.2 | -102.5 | -112.2 | -123.6 | -122.8 | -103.6 | -112.7 | -119.3 |
| #c83     | -95.5 <sup>c</sup>  | -103.0 | -113.2 | -98.0  | -104.5 | -99.9  | -95.2  | -97.2  | -106.9 | -106.1 | -90.3  | -97.8  | -103.6 |
| #c84     | -82.8 <sup>c</sup>  | -95.0  | -106.7 | -91.0  | -95.6  | -89.5  | -83.8  | -84.1  | -92.1  | -91.4  | -77.6  | -83.8  | -88.6  |
| #c85     | -113.3 <sup>c</sup> | -131.1 | -143.0 | -122.4 | -124.9 | -118.5 | -110.1 | -116.3 | -120.6 | -120.5 | -100.5 | -103.6 | -107.0 |
| #c86     | -17.3 <sup>b</sup>  | -17.7  | -15.8  | -14.6  | -16.9  | -17.1  | -14.0  | -16.0  | -22.4  | -23.0  | -14.1  | -18.1  | -25.0  |
| #c87     | -8.3 <sup>b</sup>   | -8.6   | 3.0    | -4.0   | -8.3   | -5.7   | -1.8   | -2.9   | -5.2   | -5.9   | -2.7   | -3.8   | -7.4   |
| #c88     | -27.0 <sup>f</sup>  | -38.0  | -38.1  | -33.3  | -36.8  | -34.5  | -27.5  | -24.5  | -30.1  | -30.1  | -24.3  | -28.0  | -33.0  |
| #c89     | -25.9 <sup>c</sup>  | -32.9  | -31.5  | -34.1  | -20.7  | -25.5  | -34.3  | -30.3  | -30.7  | -30.9  | -31.9  | -32.1  | -32.8  |
| #c90     | -39.7 <sup>b</sup>  | -42.3  | -41.6  | -44.2  | -38.2  | -41.1  | -45.2  | -44.2  | -45.5  | -45.8  | -46.5  | -47.3  | -49.1  |
| #c91     | -45.5 <sup>b</sup>  | -47.5  | -47.7  | -48.6  | -41.2  | -44.8  | -50.5  | -48.2  | -51.2  | -51.3  | -50.5  | -52.6  | -55.3  |
| #c92     | -48.9 <sup>b</sup>  | -52.2  | -54.6  | -54.1  | -46.7  | -50.2  | -55.7  | -53.0  | -57.5  | -57.5  | -55.4  | -58.8  | -62.4  |
| #c93     | -54.5 <sup>d</sup>  | -56.9  | -61.4  | -59.4  | -51.6  | -55.3  | -60.9  | -57.5  | -63.7  | -63.5  | -60.2  | -64.9  | -69.4  |
| #c94     | -59.4 <sup>d</sup>  | -61.6  | -68.3  | -64.9  | -56.6  | -60.4  | -66.1  | -62.1  | -69.9  | -69.6  | -65.1  | -71.2  | -76.5  |
| #c95     | -63.1 <sup>d</sup>  | -66.3  | -75.1  | -70.3  | -61.6  | -65.5  | -71.2  | -66.7  | -76.1  | -75.7  | -69.9  | -77.4  | -83.6  |
| #c96     | -69.2 <sup>d</sup>  | -71.0  | -82.0  | -75.7  | -66.6  | -70.6  | -76.3  | -71.2  | -82.3  | -81.8  | -74.7  | -83.6  | -90.6  |

. . . continued on next page . . .

Table S22: . . . continued from previous page . . .

| Molecule | Ref.                | MNDO   | AMI    | PM3    | PM6    | PM7    | OM1    |        | OM2    |        | OM3    |        | OM3    |        | D3T    |
|----------|---------------------|--------|--------|--------|--------|--------|--------|--------|--------|--------|--------|--------|--------|--------|--------|
|          |                     |        |        |        |        |        | D2     | D3     | D2     | D3     | D2     | D3     | D2     | D3     |        |
| #c97     | -52.2 <sup>b</sup>  | -50.3  | -53.1  | -54.0  | -47.6  | -51.1  | -54.6  | -55.2  | -60.1  | -60.0  | -60.0  | -57.1  | -60.8  | -64.3  | -64.3  |
| #c98     | -57.0 <sup>b</sup>  | -54.0  | -55.2  | -57.4  | -57.5  | -59.4  | -58.2  | -62.4  | -66.8  | -66.9  | -66.9  | -63.4  | -66.6  | -70.3  | -70.3  |
| #c99     | -24.0 <sup>b</sup>  | -28.3  | -26.9  | -28.7  | -23.6  | -26.4  | -29.8  | -28.5  | -31.6  | -32.1  | -32.1  | -30.1  | -32.2  | -35.8  | -35.8  |
| #c100    | -50.7 <sup>c</sup>  | -62.5  | -58.7  | -64.3  | -45.8  | -52.5  | -64.0  | -59.1  | -60.3  | -60.6  | -60.6  | -62.6  | -63.2  | -65.0  | -65.0  |
| #c101    | -8.8 <sup>c</sup>   | -9.9   | -8.9   | -10.6  | -3.0   | -6.1   | -14.0  | -14.5  | -20.1  | -20.9  | -20.9  | -15.6  | -18.7  | -25.6  | -25.6  |
| #c102    | -137.1 <sup>b</sup> | -132.6 | -131.7 | -135.0 | -138.8 | -140.3 | -136.7 | -139.5 | -143.4 | -143.9 | -143.9 | -138.8 | -141.4 | -145.7 | -145.7 |
| #c103    | -95.2 <sup>c</sup>  | -88.5  | -76.4  | -90.1  | -84.4  | -82.4  | -85.6  | -87.1  | -89.8  | -90.4  | -90.4  | -87.2  | -88.4  | -92.5  | -92.5  |
| #c104    | -51.9 <sup>b</sup>  | -49.4  | -49.2  | -53.3  | -54.4  | -55.5  | -52.4  | -57.4  | -60.1  | -60.4  | -60.4  | -59.3  | -61.2  | -63.9  | -63.9  |
| #c105    | -61.6 <sup>b</sup>  | -58.6  | -61.1  | -61.5  | -60.5  | -63.3  | -63.6  | -67.1  | -73.4  | -73.4  | -73.4  | -67.9  | -72.7  | -77.1  | -77.1  |
| #c106    | -61.9 <sup>b</sup>  | -58.6  | -62.1  | -62.9  | -63.0  | -64.8  | -63.4  | -67.0  | -73.0  | -73.0  | -73.0  | -68.3  | -72.9  | -77.5  | -77.5  |
| #c107    | -62.8 <sup>k1</sup> | -56.6  | -59.4  | -62.5  | -62.4  | -64.6  | -62.3  | -69.2  | -75.6  | -75.6  | -75.5  | -69.8  | -74.8  | -79.4  | -79.3  |
| #c108    | -66.9 <sup>b</sup>  | -63.3  | -68.9  | -68.3  | -67.9  | -69.8  | -68.6  | -71.6  | -79.3  | -79.1  | -79.1  | -73.1  | -79.0  | -84.5  | -84.5  |
| #c109    | -69.5 <sup>k1</sup> | -50.8  | -61.5  | -67.1  | -68.0  | -70.2  | -62.5  | -76.9  | -86.1  | -85.5  | -85.5  | -75.4  | -83.0  | -88.3  | -88.2  |
| #c110    | -66.5 <sup>b</sup>  | -63.2  | -68.0  | -67.0  | -65.9  | -68.7  | -68.9  | -71.7  | -79.6  | -79.4  | -79.4  | -72.8  | -78.9  | -84.4  | -84.4  |
| #c111    | -68.4 <sup>l</sup>  | -61.1  | -65.4  | -66.7  | -65.4  | -68.7  | -67.9  | -73.9  | -82.3  | -82.1  | -82.0  | -73.9  | -80.2  | -85.8  | -85.7  |
| #c112    | -75.0 <sup>l</sup>  | -55.3  | -67.4  | -71.6  | -71.0  | -74.4  | -67.9  | -81.3  | -92.4  | -91.7  | -91.6  | -78.9  | -88.0  | -94.1  | -94.1  |
| #c113    | -74.4 <sup>l</sup>  | -63.0  | -69.4  | -71.4  | -70.3  | -74.2  | -71.8  | -80.7  | -91.0  | -90.6  | -90.5  | -79.8  | -88.2  | -94.6  | -94.5  |
| #c114    | -80.8 <sup>b</sup>  | -56.4  | -71.0  | -76.6  | -75.9  | -79.9  | -71.9  | -88.0  | -101.4 | -100.5 | -100.4 | -85.1  | -96.5  | -103.6 | -103.5 |
| #c115    | -78.2 <sup>b</sup>  | -78.8  | -74.1  | -83.4  | -79.0  | -82.9  | -82.6  | -88.8  | -92.7  | -93.0  | -93.0  | -90.7  | -93.4  | -97.3  | -97.3  |
| #c116    | -90.5 <sup>b</sup>  | -84.3  | -85.6  | -91.6  | -95.0  | -96.0  | -91.0  | -99.2  | -105.0 | -105.2 | -105.2 | -101.8 | -106.2 | -111.0 | -111.0 |
| #c117    | -29.3 <sup>b</sup>  | -32.9  | -25.0  | -31.5  | -27.7  | -28.4  | -26.1  | -32.5  | -37.2  | -37.9  | -37.9  | -32.9  | -35.3  | -41.3  | -41.3  |
| #c118    | -46.0 <sup>b</sup>  | -57.0  | -55.3  | -55.2  | -53.9  | -53.6  | -55.1  | -55.0  | -60.6  | -60.6  | -60.6  | -57.5  | -61.3  | -66.1  | -66.1  |
| #c119    | -54.0 <sup>b</sup>  | -60.1  | -63.3  | -60.2  | -59.8  | -59.5  | -59.5  | -59.9  | -68.1  | -67.6  | -67.6  | -62.1  | -68.0  | -73.8  | -73.7  |
| #c120    | -59.1 <sup>c</sup>  | -59.4  | -65.5  | -60.1  | -61.1  | -60.7  | -60.3  | -59.3  | -70.1  | -69.2  | -69.1  | -61.7  | -70.1  | -76.6  | -76.5  |
| #c121    | -20.7 <sup>c</sup>  | -17.0  | -15.0  | -18.2  | -17.8  | -19.7  | -20.3  | -27.4  | -34.7  | -35.5  | -35.5  | -27.6  | -32.1  | -40.0  | -40.0  |
| #c122    | -37.1 <sup>c</sup>  | -48.4  | -32.7  | -44.9  | -48.1  | -47.4  | -42.9  | -50.7  | -55.6  | -56.4  | -56.4  | -50.8  | -53.8  | -59.6  | -59.6  |
| #c123    | -36.1 <sup>c</sup>  | -38.6  | -32.9  | -31.0  | -35.8  | -34.9  | -29.7  | -32.0  | -38.2  | -39.1  | -39.1  | -34.4  | -38.3  | -45.5  | -45.4  |
| #c124    | -90.6 <sup>b</sup>  | -92.6  | -97.4  | -94.4  | -87.9  | -89.5  | -91.7  | -86.9  | -87.5  | -87.8  | -87.8  | -88.2  | -88.6  | -89.7  | -89.7  |
| #c125    | -103.3 <sup>b</sup> | -101.1 | -103.0 | -102.0 | -101.3 | -102.2 | -101.3 | -101.0 | -102.7 | -103.0 | -103.0 | -102.7 | -103.8 | -106.0 | -106.0 |
| #c126    | -108.4 <sup>c</sup> | -105.6 | -109.0 | -106.3 | -105.2 | -106.7 | -107.0 | -106.3 | -109.7 | -109.8 | -109.8 | -107.5 | -109.8 | -112.9 | -112.9 |
| #c127    | -113.7 <sup>c</sup> | -110.3 | -115.9 | -111.8 | -110.5 | -112.0 | -112.4 | -111.2 | -116.1 | -116.2 | -116.2 | -112.3 | -116.0 | -120.0 | -120.0 |
| #c128    | -117.1 <sup>c</sup> | -115.0 | -122.8 | -117.2 | -115.4 | -117.0 | -117.6 | -115.6 | -122.2 | -122.1 | -122.1 | -117.1 | -122.2 | -127.0 | -127.0 |
| #c129    | -122.5 <sup>c</sup> | -119.7 | -129.6 | -122.6 | -120.4 | -122.1 | -122.7 | -120.3 | -128.5 | -128.3 | -128.3 | -121.9 | -128.4 | -134.1 | -134.1 |
| #c130    | -127.7 <sup>c</sup> | -124.4 | -136.4 | -128.0 | -125.4 | -127.2 | -127.9 | -124.8 | -134.7 | -134.3 | -134.3 | -126.8 | -134.6 | -141.2 | -141.2 |
| #c131    | -173.0 <sup>c</sup> | -170.6 | -169.7 | -174.5 | -156.3 | -159.6 | -167.1 | -162.5 | -164.6 | -165.0 | -165.0 | -164.2 | -165.4 | -168.1 | -168.1 |
| #c132    | -162.4 <sup>c</sup> | -157.6 | -154.6 | -158.2 | -148.6 | -150.8 | -149.3 | -149.1 | -153.4 | -153.9 | -153.9 | -150.5 | -153.3 | -157.9 | -157.9 |
| #c133    | -196.7 <sup>c</sup> | -186.6 | -193.3 | -190.9 | -185.7 | -187.4 | -187.4 | -184.8 | -190.0 | -190.2 | -190.2 | -187.2 | -190.9 | -195.5 | -195.5 |
| #c134    | -80.4 <sup>d</sup>  | -72.7  | -71.4  | -73.0  | -68.0  | -68.8  | -70.2  | -68.9  | -71.3  | -71.7  | -71.7  | -69.2  | -70.7  | -73.6  | -73.6  |
| #c135    | -70.7 <sup>c</sup>  | -67.7  | -68.0  | -66.2  | -64.7  | -66.1  | -69.0  | -71.1  | -77.2  | -78.0  | -78.0  | -71.0  | -74.5  | -81.8  | -81.8  |
| #c136    | -85.0 <sup>c</sup>  | -85.5  | -91.0  | -87.0  | -84.4  | -84.0  | -83.5  | -81.4  | -83.3  | -83.5  | -83.5  | -79.4  | -80.6  | -82.6  | -82.6  |
| #c137    | -106.3 <sup>b</sup> | -98.9  | -102.2 | -98.9  | -105.7 | -104.5 | -102.3 | -103.9 | -108.3 | -108.5 | -108.5 | -102.1 | -105.3 | -109.2 | -109.2 |
| #c138    | -111.1 <sup>c</sup> | -103.4 | -108.2 | -103.1 | -109.5 | -108.9 | -108.1 | -109.1 | -115.1 | -115.2 | -115.2 | -106.8 | -111.2 | -116.1 | -116.1 |
| #c139    | -89.7 <sup>m1</sup> | -83.3  | -89.4  | -82.8  | -88.3  | -88.1  | -87.5  | -86.9  | -95.1  | -95.2  | -95.2  | -83.8  | -90.1  | -96.5  | -96.5  |
| #c140    | -112.7 <sup>c</sup> | -107.4 | -116.1 | -109.2 | -111.5 | -111.4 | -109.4 | -110.4 | -118.0 | -118.1 | -118.1 | -108.2 | -114.3 | -120.0 | -120.0 |

. . . continued on next page . . .







Table S22: . . . continued from previous page . . .

| Molecule | Ref.                | MNDO  | AMI    | PM3   | PM6    | PM7    | OM1    |       | OM2    |        | OM3    |        | OM3    |        | D3T |
|----------|---------------------|-------|--------|-------|--------|--------|--------|-------|--------|--------|--------|--------|--------|--------|-----|
|          |                     |       |        |       |        |        | OM1    | OM2   | D2     | D3     | D3T    | D2     | D3     | D3T    |     |
| #c231    | -62.0 <sup>o1</sup> | -57.6 | -64.4  | -64.4 | -50.1  | -55.8  | -62.6  | -63.1 | -72.2  | -71.7  | -60.9  | -68.3  | -73.9  | -73.9  |     |
| #c232    | -64.0 <sup>o1</sup> | -53.5 | -60.8  | -61.2 | -52.5  | -58.4  | -62.0  | -66.1 | -76.0  | -75.3  | -63.5  | -71.6  | -77.2  | -77.2  |     |
| #c233    | -63.0 <sup>o1</sup> | -52.6 | -61.7  | -62.6 | -53.1  | -59.2  | -60.9  | -66.1 | -76.3  | -75.5  | -63.6  | -71.9  | -77.6  | -77.6  |     |
| #c234    | 10.5 <sup>c</sup>   | 7.5   | 13.9   | 14.2  | 10.3   | 11.4   | 15.9   | 15.2  | 9.4    | 8.6    | 13.5   | 9.9    | 3.3    | 3.4    |     |
| #c235    | -26.0 <sup>c</sup>  | -22.1 | -20.8  | -22.7 | -20.8  | -23.6  | -25.7  | -32.0 | -40.7  | -41.3  | -31.6  | -37.5  | -46.4  | -46.4  |     |
| #c236    | -31.3 <sup>w1</sup> | -33.3 | -31.4  | -37.1 | -23.8  | -28.9  | -32.5  | -36.7 | -38.0  | -38.1  | -33.9  | -34.8  | -36.1  | -36.1  |     |
| #c237    | -47.5 <sup>c</sup>  | -38.4 | -38.0  | -42.8 | -31.6  | -36.7  | -40.2  | -43.8 | -46.6  | -46.6  | -41.5  | -43.6  | -45.8  | -45.8  |     |
| #c238    | -47.1 <sup>w1</sup> | -40.9 | -41.9  | -46.3 | -39.1  | -44.1  | -47.3  | -53.2 | -57.7  | -57.5  | -50.3  | -53.9  | -57.0  | -57.0  |     |
| #d01     | -44.5 <sup>x1</sup> | -40.2 | -44.8  | -41.8 | -40.6  | -44.1  | -41.2  | -39.8 | -40.7  | -41.1  | -46.3  | -46.9  | -48.4  | -48.4  |     |
| #d02     | -45.8 <sup>b</sup>  | -37.2 | -36.9  | -44.6 | -40.9  | -43.9  | -43.2  | -43.5 | -47.3  | -47.6  | -41.4  | -44.5  | -47.8  | -47.7  |     |
| #d03     | -57.0 <sup>f</sup>  | -48.2 | -50.7  | -51.0 | -55.1  | -56.6  | -47.7  | -50.7 | -52.8  | -53.2  | -57.4  | -58.9  | -61.4  | -61.4  |     |
| #d04     | -66.7 <sup>f</sup>  | -57.3 | -63.4  | -61.1 | -63.7  | -65.9  | -58.5  | -60.3 | -65.5  | -65.9  | -66.7  | -70.8  | -75.2  | -75.2  |     |
| #d05     | -69.4 <sup>c</sup>  | -62.8 | -70.2  | -66.5 | -68.5  | -70.9  | -63.6  | -64.8 | -72.0  | -72.0  | -71.6  | -77.3  | -82.4  | -82.4  |     |
| #d06     | -78.4 <sup>c</sup>  | -67.5 | -77.0  | -71.9 | -73.6  | -76.0  | -68.8  | -69.4 | -78.2  | -78.1  | -76.4  | -83.5  | -89.5  | -89.5  |     |
| #d07     | -58.7 <sup>c</sup>  | -44.9 | -45.0  | -47.0 | -49.3  | -51.6  | -43.6  | -39.9 | -41.6  | -42.1  | -49.3  | -50.5  | -52.8  | -52.8  |     |
| #d08     | -96.2 <sup>c</sup>  | -77.0 | -82.0  | -80.9 | -82.5  | -87.2  | -76.9  | -80.4 | -83.3  | -83.9  | -92.8  | -94.7  | -98.2  | -98.1  |     |
| #d09     | -112.7 <sup>c</sup> | -99.1 | -103.8 | -99.8 | -105.6 | -105.2 | -102.1 | -99.1 | -104.7 | -104.9 | -101.8 | -106.0 | -110.6 | -110.6 |     |
| #d10     | -58.8 <sup>c</sup>  | -55.4 | -60.6  | -58.6 | -62.9  | -61.1  | -54.6  | -50.7 | -60.5  | -59.9  | -55.7  | -63.4  | -69.6  | -69.5  |     |
| #d11     | -64.7 <sup>f</sup>  | -50.4 | -54.0  | -61.3 | -62.0  | -64.6  | -58.9  | -62.7 | -71.6  | -71.5  | -60.0  | -67.2  | -73.4  | -73.3  |     |
| #d12     | -17.9 <sup>b</sup>  | 3.3   | -9.9   | -15.9 | -16.3  | -17.2  | -6.9   | -17.3 | -18.8  | -19.1  | -15.7  | -16.7  | -18.5  | -18.5  |     |
| #d13     | -24.4 <sup>b</sup>  | -3.3  | -16.9  | -21.4 | -21.7  | -22.7  | -14.7  | -23.4 | -26.4  | -26.6  | -22.0  | -24.3  | -27.0  | -27.0  |     |
| #d14     | -30.0 <sup>b</sup>  | -8.1  | -23.8  | -26.8 | -26.8  | -27.9  | -20.1  | -28.2 | -32.8  | -32.9  | -26.8  | -30.3  | -34.0  | -34.0  |     |
| #d15     | -33.2 <sup>b</sup>  | -6.3  | -21.6  | -27.1 | -28.8  | -29.2  | -20.6  | -31.2 | -36.1  | -36.1  | -29.9  | -33.8  | -37.4  | -37.4  |     |
| #d16     | -34.4 <sup>b</sup>  | -12.8 | -30.6  | -32.1 | -31.6  | -32.8  | -25.3  | -32.8 | -39.0  | -39.0  | -31.5  | -36.5  | -40.9  | -40.9  |     |
| #d17     | -39.1 <sup>b</sup>  | -10.1 | -28.2  | -31.9 | -33.9  | -34.3  | -25.9  | -36.2 | -43.0  | -42.9  | -34.8  | -40.4  | -44.9  | -44.9  |     |
| #d18     | -32.1 <sup>y</sup>  | -17.5 | -37.5  | -38.0 | -37.1  | -34.3  | -28.2  | -33.6 | -34.3  | -34.6  | -33.7  | -35.1  | -35.1  | -35.1  |     |
| #d19     | -29.1 <sup>b</sup>  | -12.4 | -31.3  | -32.4 | -36.9  | -31.4  | -23.0  | -32.7 | -34.6  | -34.9  | -28.4  | -29.7  | -31.8  | -31.8  |     |
| #d20     | -36.8 <sup>b</sup>  | -17.9 | -37.3  | -36.4 | -43.9  | -38.8  | -32.7  | -41.6 | -44.8  | -45.1  | -36.6  | -38.9  | -42.0  | -42.0  |     |
| #d21     | -41.6 <sup>b</sup>  | -22.6 | -44.0  | -41.6 | -48.9  | -43.8  | -38.2  | -46.7 | -51.5  | -51.7  | -41.5  | -45.2  | -49.1  | -49.1  |     |
| #d22     | -45.6 <sup>b</sup>  | -19.7 | -42.1  | -42.1 | -53.2  | -47.4  | -38.8  | -51.7 | -56.9  | -57.0  | -46.1  | -50.1  | -54.0  | -54.0  |     |
| #d23     | -18.3 <sup>f</sup>  | -40.7 | -39.4  | -14.9 | -18.4  | -23.6  | -30.3  | -19.7 | -20.0  | -20.3  | -26.8  | -26.9  | -27.8  | -27.8  |     |
| #d24     | -15.6 <sup>f</sup>  | -36.7 | -31.8  | -9.1  | -16.5  | -19.2  | -24.4  | -16.8 | -18.0  | -18.4  | -20.0  | -20.9  | -22.6  | -22.6  |     |
| #d25     | -37.7 <sup>f</sup>  | -32.0 | -31.9  | -33.6 | -37.8  | -39.6  | -27.8  | -33.5 | -38.0  | -38.4  | -38.7  | -42.0  | -46.3  | -46.3  |     |
| #d26     | -59.3 <sup>f</sup>  | -47.8 | -47.3  | -51.4 | -55.0  | -56.2  | -49.6  | -51.4 | -54.9  | -55.3  | -54.1  | -56.7  | -60.2  | -60.2  |     |
| #d27     | 3.6 <sup>b</sup>    | 8.2   | 35.3   | 26.1  | 12.3   | 11.4   | 19.1   | 12.6  | 9.5    | 8.7    | 13.0   | 11.1   | 6.8    | 6.8    |     |
| #d28     | 4.8 <sup>b</sup>    | 7.5   | 35.0   | 25.7  | 13.1   | 13.2   | 21.6   | 16.4  | 13.2   | 12.4   | 16.1   | 14.3   | 9.9    | 9.9    |     |
| #d29     | -4.3 <sup>b</sup>   | -3.5  | 27.4   | 16.7  | 2.1    | 1.9    | 12.3   | 5.2   | 0.7    | -0.2   | 5.0    | 2.1    | -3.3   | -3.3   |     |
| #d30     | -4.8 <sup>b</sup>   | -13.2 | 19.5   | 7.4   | -5.6   | -6.6   | 7.0    | -3.4  | -9.9   | -10.6  | -3.1   | -7.7   | -14.1  | -14.1  |     |
| #d31     | -24.3 <sup>f</sup>  | -10.8 | -15.2  | -15.3 | -21.0  | -23.4  | -18.8  | -7.2  | -7.6   | -7.9   | -19.5  | -19.7  | -20.7  | -20.7  |     |
| #d32     | -61.9 <sup>f</sup>  | -53.4 | -56.4  | -55.7 | -58.8  | -60.8  | -53.4  | -55.7 | -59.5  | -59.8  | -62.0  | -64.9  | -68.4  | -68.4  |     |
| #d33     | -48.6 <sup>f</sup>  | -50.1 | -48.5  | -53.5 | -49.2  | -50.5  | -48.0  | -47.2 | -52.2  | -52.2  | -41.1  | -45.2  | -48.5  | -48.5  |     |
| #d34     | -72.8 <sup>b</sup>  | -62.4 | -67.0  | -68.2 | -72.4  | -73.4  | -65.9  | -65.8 | -74.2  | -74.3  | -69.1  | -75.7  | -81.8  | -81.8  |     |
| #d35     | -91.4 <sup>f</sup>  | -53.3 | -53.3  | -55.7 | -60.6  | -63.2  | -47.7  | -57.4 | -66.5  | -67.7  | -67.9  | -74.0  | -83.5  | -83.5  |     |
| #d36     | -93.7 <sup>b</sup>  | -95.2 | -101.5 | -93.8 | -89.7  | -93.2  | -91.1  | -88.2 | -91.0  | -91.3  | -91.3  | -93.2  | -96.1  | -96.1  |     |

. . . continued on next page . . .

Table S22: . . . continued from previous page . . . .

| Molecule | Ref.                | MNDO   | AMI    | PM3    | PM6    | PM7    | OM1    | OM2    |        | OM3    |        | D3T    | D3T    |
|----------|---------------------|--------|--------|--------|--------|--------|--------|--------|--------|--------|--------|--------|--------|
|          |                     |        |        |        |        |        |        | D2     | D3     | D2     | D3     |        |        |
| #d37     | -99.1 <sup>91</sup> | -97.2  | -100.8 | -98.2  | -98.4  | -97.9  | -95.3  | -95.1  | -99.6  | -99.8  | -98.0  | -101.4 | -105.3 |
| #d38     | -108.8 <sup>b</sup> | -99.1  | -114.1 | -107.7 | -108.8 | -108.4 | -102.2 | -109.5 | -118.5 | -118.2 | -111.4 | -117.1 | -124.2 |
| #d39     | -116.3 <sup>b</sup> | -105.1 | -120.5 | -113.8 | -114.1 | -113.7 | -107.1 | -113.6 | -124.3 | -123.9 | -115.7 | -120.9 | -130.9 |
| #d40     | -24.1 <sup>f</sup>  | -16.1  | -16.1  | -16.2  | -18.5  | -20.4  | -15.4  | -20.1  | -26.8  | -27.7  | -25.2  | -29.3  | -36.9  |
| #d41     | -67.5 <sup>f</sup>  | -55.1  | -60.9  | -60.2  | -63.5  | -65.9  | -57.4  | -62.8  | -68.7  | -68.7  | -68.3  | -73.0  | -77.2  |

a M.W.Chase, C.A.Davies, J.R.Downey, D.R.Frurip, R.A.McDonald, and A.N.Syverud, "JANAF Thermochemical Tables", 3rd edition, J.Phys.Chem.Ref.Data 14, Suppl.1 (1985). b J.D.Cox, G.Pilcher, "Thermochemistry of Organic and Organometallic Compounds", Academic Press Inc., New York (1970). c J.B.Pedley, R.D.Naylor, S.P.Kirby, "Thermochemical Data of Organic Compounds", 2 ed., Chapman and Hall, New York (1986). d R.D.Stull, E.F.J.Westrum, G.C.Sinke, "The Chemical Thermodynamics of Organic Compounds", John Wiley & Sons, Inc., New York (1969). e S.G.Lias, J.E.Bartmess, J.F.Liebman, J.L.Holmes, R.D.Levin, W.G.Mallard, J.Phys.Chem.Ref.Data, Suppl. 17 (1998). f H.Y.Afeefy, J.F.Liebman, and S.E.Stein, "Neutral Thermochemical Data", 20899 (<http://webbook.nist.gov>) ed.; P.J.Linstrom, and W.G.Mallard, Ed., National Institute of Standards and Technology, Gaithersburg, MD (2001). g W.V.Steele, R.D.Chirico, A.Nguyen, I.A.Hossenlopp, and N.K.Smith, Am.Inst.Chem.Eng.Symp.Ser. (AIChE Symp.Ser.) 138 (1990). h W.R.Roth, O.Adameczak, R.Breuckmann, H.W.Lennartz, and R.Boese, Chem.Ber. 124. 2499-2521 (1991). i W.Fang and D.W.Rogers, J.Org.Chem. 57, 2294 (1992). j S.W.Benson and H.E.O'Neal, "Kinetic Data on Gas Phase Unimolecular Reactions" (1970). k R.B.Turner, P.Goebel, B.J.Mallon, W.v.E.Doering, J.F.J.Coburn, and M.Pomerantz, J.Am.Chem.Soc. 90, 4315 (1968). l T.V.Siretskaya, V.V.Takhistov, S.M.Pimenova, V.M.Orlov, and V.N.Pustobaev, React.Kinet.Catal.Lett. 31, 15 (1986). m D.w.Rogers, O.A.Dagdagan, and N.L.Allinger, J.Am.Chem.Soc. 101, 671 (1979). n R.Shaw, "The Chemistry of the Carbon-Carbon Triple Bond", John Wiley & Sons, New York, Vol. 1 (1978). o N.D.Lebedeva, V.L.Ryadnenko, N.N.Kiseleva, and L.F.Nazarova, Vses.Konf.Kalorim.Rasshir.Teziy.Dokl.7th. 1, 91 (1977). p value, S.F.N.M. q P.v.R.Schleyer, J.E.Williams, and K.R.Blanchar, J.Am.Chem.Soc. 92, 2377 (1970). r T.Bally, H.Baumgaertel, U.Buechler, E.Haselbach, W.Lohr, J.P.Maier, and J.Vogt, Helv.Chim.Acta. 61, 741 (1978). s W.D.Good, R.T.Moore, A.g.Osborn, and D.R.Douslin, J.Chem.Thermodyn. 6, 303 (1974). t M.P.Kozina, L.P.Timofeeva, S.M.Skuratov, N.A.Belikova, E.M.Milivitskaya, and A.F.Plate, J.Chem.Thermodyn. 3, 563 (1971). u K.B.Wiberg, and J.J.Wendoloski, J.Am.Chem.Soc. 104, 5679 (1982). v T.Clark, T.M.O.Knox, M.A.McKervey, H.Mackie, and J.J.Rooney, J.Am.Chem.Soc. 101, 2404 (1979). w S.P.Verevkin, M.Nolke, H.D.Beckhaus, and C.Ruchardt, J.Org.Chem. 62, 4683 (1997). x J.D.Cox, D.D.Wagnan, V.A.Medvedev, "CODATA Key Values for Thermodynamics", Hemisphere Publishing Corp., New York (1984). y M.W.J.Chase, J.Phys.Chem.Ref.Data Monograph 9, 1 (1998). z X.W.An, and M.Mansson, J.Chem.Thermodyn. 15, 287 (1983). a1 H.D.Beckhaus, B.Dogan, J.Pakusch, S.Verevkin, and C.Ruchardt, Chem.Ber. 123, 2153 (1990). b1 R.A.L.Peerboom, S.Ingenmann, N.M.M.Nibbering, and J.F.Liebman, J.Chem.Soc., Perkin.Trans.2. 1, 1825 (1990). c1 A.H.Laufefer, and H.Okabe, J.Phys.Chem. 76, 3504 (1972). d1 W.V.Steele, D.G.Archer, R.D.Chirico, W.B.Collier, I.A.Hossenlopp, A.Nguyen, N.K.Smith, and B.E.Gammon, J.Chem.Thermodyn. 20, 1233 (1988). e1 M.A.V.Silva, M.A.R.Matos, and V.M.F.Morais, J.Chem.Soc., Faraday.Trans. 91, 1907 (1995). f1 W.V.Steele, R.D.Chirico, I.A.Hossenlopp, A.Nguyen, N.K.Smith, and B.E.Gammon, J.Chem.Thermodyn. 21, 81 (1989). g1 R.Sabbah, and L.Elwatik, Thermochim.Acta. 176, 163 (1991). h1 D.M.McEachern, J.C.Iniguez, and H.C.Ornelas, J.Chem.Eng.Data. 20, 226 (1975). i1 R.Sabbah and I.Antipine, Bull.Soc.Chim.France. 3, 392 (1987). j1 P.Jimenez, M.V.Roux, C.Turron, and F.Gomis, J.Chem.Thermodyn. 19, 985 (1987). k1 A.Harrop, A.J.Head, and G.B.Lewis, J.Chem.Thermodyn. 2, 203 (1970). l1 P.Sellers, J.Chem.Thermodyn. 2, 211 (1970). m1 W.V.Steele, R.D.Chirico, S.E.Knuipmeyer, A.Nguyen, and N.K.Smith, J.Chem.Eng.Data. 41, 1285 (1996). n1 T.P.Melia and R.Merrifield, J.Appl.Chem. 19, 79 (1969). o1 K.S.Chen and N.L.Allinger, J.Comput.Chem. 14, 755 (1993). p1 S.W.S.Wong and E.F.Westrum, J.Am.Chem.Soc. 93, 5317 (1971). q1 J.E.Dubois and H.Herzog, J.Chem.Soc.Chem.Comm. 16, 932 (1972). r1 P.Seller, Acta.Chemica.Scandinava. 25, 2099 (1971). s1 W.V.Steele, J.Chem.Thermodyn. 10, 585 (1978). t1 N.L.Allinger, K.S.Chen, M.Rahman, and A.Pathiaseril, J.Am.Chem.Soc. 113, 4505 (1991). u1 M.Luisa, G.Plicher, M.Y.Yang, J.M.Brown, and A.D.Conn, J.Chem.Thermodyn. 22, 885 (1990). v1 K.B.Wiberg and R.F.Waldron, J.Am.Chem.Soc. 113, 7697 (1991). w1 S.L.Khursan and V.S.Martem'yanov, Russ.J.Phys.Chem.(Engl.Transl). 65, 321 (1991). x1 A.Bauder and H.H.Gunthard, Helv.Chim.Acta. 41, 670 (1958). y1 S.N.Ngaur, R.Sabbah, and M.Laffitte, Thermochim.Acta. 20, 371 (1977).

Table S23: Benchmark Results for the PDDG Data Set. Ionization Potentials (eV)

| Molecule | Ref.               | MNDO  | AM1   | PM3   | PM6   | PM7   | OM1   | OM2   |       | OM3   |       | D3T   | D3T   |
|----------|--------------------|-------|-------|-------|-------|-------|-------|-------|-------|-------|-------|-------|-------|
|          |                    |       |       |       |       |       |       | D2    | D3    | D2    | D3    |       |       |
| #01      | 15.40 <sup>a</sup> | 15.75 | 14.92 | 16.11 | 15.04 | 15.03 | 15.96 | 15.68 | 15.68 | 15.65 | 15.65 | 15.65 | 15.65 |
| #02      | 13.60 <sup>a</sup> | 13.87 | 13.31 | 13.64 | 13.68 | 13.73 | 14.28 | 13.64 | 13.64 | 14.17 | 14.16 | 14.17 | 14.17 |
| #03      | 12.00 <sup>a</sup> | 12.70 | 11.77 | 11.98 | 11.92 | 11.97 | 12.44 | 11.92 | 11.92 | 12.30 | 12.30 | 12.30 | 12.30 |
| #04      | 11.50 <sup>a</sup> | 12.34 | 11.32 | 11.51 | 11.34 | 11.39 | 11.84 | 11.39 | 11.39 | 11.69 | 11.70 | 11.69 | 11.69 |
| #05      | 11.20 <sup>a</sup> | 12.21 | 11.17 | 11.35 | 11.13 | 11.18 | 11.59 | 11.40 | 11.39 | 11.47 | 11.48 | 11.47 | 11.47 |
| #06      | 10.30 <sup>a</sup> | 12.16 | 11.11 | 11.30 | 11.04 | 11.09 | 11.41 | 10.66 | 10.66 | 11.35 | 11.33 | 11.34 | 11.34 |
| #12      | 11.40 <sup>a</sup> | 12.12 | 11.29 | 11.59 | 11.21 | 11.28 | 11.54 | 11.06 | 11.07 | 11.41 | 11.42 | 11.41 | 11.41 |
| #13      | 11.30 <sup>a</sup> | 12.12 | 11.53 | 12.06 | 11.34 | 11.38 | 11.30 | 10.82 | 10.82 | 11.31 | 11.31 | 11.31 | 11.31 |
| #14      | 10.30 <sup>a</sup> | 12.00 | 11.20 | 11.50 | 11.05 | 11.13 | 11.19 | 10.65 | 10.65 | 11.13 | 11.13 | 11.13 | 11.13 |
| #49      | 10.50 <sup>a</sup> | 10.17 | 10.55 | 10.64 | 10.68 | 10.75 | 10.79 | 10.74 | 10.74 | 11.05 | 11.05 | 11.05 | 11.05 |
| #50      | 9.90 <sup>a</sup>  | 9.96  | 9.98  | 10.09 | 10.04 | 10.13 | 10.09 | 9.97  | 9.97  | 10.27 | 10.27 | 10.27 | 10.27 |
| #51      | 9.70 <sup>a</sup>  | 9.97  | 10.01 | 10.15 | 10.02 | 10.11 | 10.04 | 9.93  | 9.93  | 10.26 | 10.26 | 10.26 | 10.26 |
| #52      | 7.90 <sup>a</sup>  | 9.96  | 9.99  | 10.14 | 10.01 | 10.10 | 9.99  | 9.86  | 9.85  | 10.21 | 10.21 | 10.21 | 10.21 |
| #67      | 8.70 <sup>a</sup>  | 9.64  | 9.23  | 9.37  | 9.07  | 9.20  | 9.07  | 8.94  | 8.94  | 9.19  | 9.19  | 9.19  | 9.19  |
| #68      | 7.40 <sup>a</sup>  | 9.81  | 9.70  | 9.85  | 9.64  | 9.73  | 9.58  | 9.47  | 9.47  | 9.78  | 9.79  | 9.78  | 9.78  |
| #69      | 9.60 <sup>a</sup>  | 9.98  | 10.09 | 10.26 | 10.10 | 10.16 | 9.98  | 9.88  | 9.88  | 10.25 | 10.24 | 10.25 | 10.25 |
| #97      | 10.10 <sup>a</sup> | 10.02 | 10.14 | 10.18 | 10.37 | 10.40 | 10.19 | 10.16 | 10.16 | 10.44 | 10.44 | 10.45 | 10.45 |
| #98      | 9.20 <sup>a</sup>  | 9.84  | 9.67  | 9.72  | 9.72  | 9.79  | 9.58  | 9.49  | 9.50  | 9.75  | 9.76  | 9.75  | 9.75  |
| #106     | 9.10 <sup>a</sup>  | 9.92  | 9.94  | 10.05 | 9.98  | 10.12 | 10.02 | 9.89  | 9.90  | 10.16 | 10.17 | 10.18 | 10.17 |
| #112     | 11.40 <sup>a</sup> | 11.01 | 11.50 | 11.61 | 11.59 | 11.62 | 11.49 | 11.55 | 11.55 | 11.79 | 11.79 | 11.79 | 11.79 |
| #113     | 10.40 <sup>a</sup> | 10.72 | 10.74 | 10.89 | 10.73 | 10.76 | 10.66 | 10.64 | 10.64 | 10.88 | 10.88 | 10.88 | 10.88 |
| #114     | 10.20 <sup>a</sup> | 10.68 | 10.62 | 10.77 | 10.62 | 10.63 | 10.55 | 10.51 | 10.51 | 10.76 | 10.76 | 10.76 | 10.76 |
| #121     | 9.60 <sup>a</sup>  | 10.47 | 10.17 | 10.35 | 10.02 | 10.05 | 9.99  | 9.91  | 9.91  | 10.14 | 10.15 | 10.14 | 10.15 |
| #128     | 10.20 <sup>a</sup> | 9.99  | 10.37 | 10.47 | 10.58 | 10.53 | 10.06 | 10.30 | 10.30 | 10.47 | 10.46 | 10.47 | 10.47 |
| #137     | 9.30 <sup>a</sup>  | 9.39  | 9.65  | 9.75  | 9.64  | 9.82  | 9.66  | 9.59  | 9.59  | 9.91  | 9.91  | 9.91  | 9.91  |
| #138     | 8.20 <sup>a</sup>  | 8.57  | 8.71  | 8.84  | 8.88  | 8.95  | 8.48  | 8.51  | 8.51  | 8.79  | 8.79  | 8.79  | 8.79  |
| #139     | 8.20 <sup>a</sup>  | 8.05  | 8.12  | 8.25  | 8.37  | 8.39  | 7.74  | 7.81  | 7.80  | 8.07  | 8.07  | 8.07  | 8.07  |
| #144     | 8.80 <sup>a</sup>  | 9.28  | 9.33  | 9.44  | 9.24  | 9.43  | 9.26  | 9.17  | 9.16  | 9.46  | 9.46  | 9.46  | 9.46  |
| #145     | 8.80 <sup>a</sup>  | 9.28  | 9.37  | 9.44  | 9.28  | 9.45  | 9.24  | 9.14  | 9.13  | 9.47  | 9.47  | 9.47  | 9.47  |
| #163     | 11.00 <sup>a</sup> | 11.43 | 11.48 | 11.78 | 11.42 | 11.59 | 11.61 | 10.88 | 10.88 | 11.47 | 11.46 | 11.47 | 11.47 |
| #164     | 10.70 <sup>a</sup> | 11.81 | 10.99 | 11.02 | 11.02 | 11.07 | 11.06 | 10.38 | 10.37 | 10.98 | 10.97 | 10.98 | 10.98 |
| #165     | 10.50 <sup>a</sup> | 12.06 | 10.97 | 11.07 | 11.00 | 11.03 | 11.46 | 10.91 | 10.91 | 11.28 | 11.29 | 11.29 | 11.29 |
| #166     | 10.30 <sup>a</sup> | 11.74 | 10.93 | 11.29 | 10.76 | 10.80 | 10.85 | 10.15 | 10.14 | 10.70 | 10.69 | 10.69 | 10.69 |
| #205     | 9.90 <sup>a</sup>  | 9.88  | 9.82  | 9.88  | 10.08 | 10.16 | 9.97  | 9.84  | 9.84  | 10.13 | 10.13 | 10.13 | 10.13 |
| #206     | 9.40 <sup>a</sup>  | 9.77  | 9.72  | 9.82  | 9.81  | 9.93  | 9.78  | 9.65  | 9.65  | 9.93  | 9.93  | 9.93  | 9.93  |
| #207     | 9.20 <sup>a</sup>  | 9.72  | 9.44  | 9.52  | 9.43  | 9.50  | 9.41  | 9.22  | 9.22  | 9.51  | 9.51  | 9.51  | 9.51  |
| #208     | 10.30 <sup>a</sup> | 9.75  | 9.49  | 9.59  | 9.40  | 9.49  | 9.44  | 9.29  | 9.29  | 9.59  | 9.59  | 9.59  | 9.59  |
| #219     | 8.50 <sup>a</sup>  | 8.72  | 8.75  | 8.95  | 8.89  | 8.99  | 8.50  | 8.57  | 8.58  | 8.82  | 8.82  | 8.84  | 8.84  |
| #220     | 8.60 <sup>a</sup>  | 9.04  | 9.08  | 9.23  | 9.20  | 9.31  | 8.92  | 8.82  | 8.82  | 9.10  | 9.10  | 9.10  | 9.10  |
| #230     | 9.50 <sup>a</sup>  | 11.41 | 10.60 | 10.97 | 10.36 | 10.39 | 10.33 | 9.77  | 9.77  | 10.25 | 10.25 | 10.25 | 10.25 |
| #242     | 9.60 <sup>a</sup>  | 11.27 | 10.43 | 10.85 | 10.17 | 10.20 | 10.13 | 9.59  | 9.59  | 10.06 | 10.06 | 10.06 | 10.06 |
| #b01     | 15.60 <sup>a</sup> | 14.87 | 14.32 | 13.80 | 12.86 | 13.66 | 15.19 | 15.46 | 15.46 | 14.51 | 14.51 | 14.51 | 14.51 |
| #b02     | 10.90 <sup>a</sup> | 11.19 | 10.42 | 9.70  | 10.10 | 10.15 | 11.08 | 10.67 | 10.67 | 11.23 | 11.23 | 11.23 | 11.23 |
| #b03     | 9.60 <sup>a</sup>  | 10.56 | 9.76  | 9.40  | 9.41  | 9.48  | 10.14 | 9.75  | 9.75  | 10.00 | 10.01 | 10.01 | 10.01 |

... continued on next page ...

Table S23: ... continued from previous page ...

| Molecule | Ref.               | MNDO  | AMI   | PM3   | PM6   | PM7   | OM1   | OM2   |       |       | OM3   |       |       | D3T   |
|----------|--------------------|-------|-------|-------|-------|-------|-------|-------|-------|-------|-------|-------|-------|-------|
|          |                    |       |       |       |       |       |       | D2    | D3    | D3T   | D2    | D3    | D3T   |       |
| #b04     | 9.50 <sup>a</sup>  | 10.54 | 9.68  | 9.37  | 9.29  | 9.36  | 10.05 | 9.60  | 9.60  | 9.60  | 9.84  | 9.85  | 9.84  | 9.84  |
| #b07     | 8.90 <sup>a</sup>  | 10.04 | 9.39  | 9.22  | 8.96  | 9.07  | 9.45  | 9.23  | 9.24  | 9.23  | 9.24  | 9.26  | 9.25  | 9.25  |
| #b08     | 8.50 <sup>a</sup>  | 9.59  | 9.12  | 9.07  | 8.65  | 8.83  | 8.90  | 8.84  | 8.86  | 8.85  | 8.87  | 8.70  | 8.69  | 8.69  |
| #b15     | 13.60 <sup>a</sup> | 13.41 | 13.68 | 12.60 | 13.13 | 13.80 | 13.56 | 13.91 | 13.91 | 13.91 | 13.94 | 13.94 | 13.94 | 13.94 |
| #b16     | 12.20 <sup>a</sup> | 12.79 | 12.46 | 12.33 | 12.77 | 12.77 | 12.45 | 12.50 | 12.50 | 12.50 | 12.63 | 12.63 | 12.63 | 12.63 |
| #b17     | 11.90 <sup>a</sup> | 12.59 | 11.99 | 12.01 | 12.30 | 12.28 | 12.18 | 12.06 | 12.06 | 12.06 | 12.25 | 12.25 | 12.25 | 12.25 |
| #b20     | 13.40 <sup>a</sup> | 13.20 | 13.31 | 12.87 | 13.58 | 13.79 | 12.94 | 13.27 | 13.27 | 13.27 | 13.22 | 13.22 | 13.22 | 13.22 |
| #b22     | 10.90 <sup>a</sup> | 10.61 | 10.86 | 10.89 | 11.25 | 11.28 | 10.85 | 10.88 | 10.88 | 10.88 | 11.09 | 11.09 | 11.09 | 11.09 |
| #b27     | 9.30 <sup>a</sup>  | 9.66  | 8.97  | 8.92  | 8.58  | 8.74  | 9.78  | 9.57  | 9.57  | 9.57  | 9.75  | 9.76  | 9.75  | 9.75  |
| #b34     | 11.30 <sup>a</sup> | 12.24 | 11.99 | 11.70 | 11.49 | 11.60 | 12.29 | 12.14 | 12.14 | 12.14 | 12.20 | 12.20 | 12.20 | 12.20 |
| #b40     | 9.90 <sup>a</sup>  | 10.68 | 10.31 | 9.92  | 9.97  | 10.16 | 10.39 | 10.13 | 10.13 | 10.13 | 10.39 | 10.39 | 10.39 | 10.39 |
| #b46     | 8.20 <sup>a</sup>  | 8.56  | 8.66  | 8.93  | 8.90  | 9.02  | 8.40  | 8.46  | 8.46  | 8.47  | 8.65  | 8.65  | 8.65  | 8.65  |
| #b50     | 9.70 <sup>a</sup>  | 9.69  | 9.93  | 10.10 | 10.10 | 10.24 | 9.99  | 9.96  | 9.96  | 9.96  | 10.13 | 10.13 | 10.13 | 10.13 |
| #b51     | 9.30 <sup>a</sup>  | 10.49 | 10.67 | 9.94  | 10.13 | 10.51 | 9.87  | 9.91  | 9.91  | 9.91  | 9.96  | 9.96  | 9.96  | 9.96  |
| #b52     | 9.70 <sup>a</sup>  | 10.38 | 10.58 | 10.29 | 10.22 | 10.39 | 10.19 | 10.03 | 10.03 | 10.03 | 10.04 | 10.05 | 10.04 | 10.04 |
| #b53     | 9.90 <sup>a</sup>  | 10.02 | 10.25 | 10.16 | 10.04 | 10.24 | 9.87  | 9.68  | 9.68  | 9.68  | 9.76  | 9.76  | 9.76  | 9.76  |
| #b65     | 7.70 <sup>a</sup>  | 8.75  | 8.52  | 8.61  | 8.47  | 8.46  | 8.55  | 8.24  | 8.24  | 8.24  | 8.42  | 8.42  | 8.43  | 8.43  |
| #b66     | 9.70 <sup>a</sup>  | 9.81  | 10.02 | 10.10 | 10.18 | 10.33 | 9.95  | 9.91  | 9.90  | 9.91  | 10.16 | 10.15 | 10.16 | 10.16 |
| #c01     | 12.60 <sup>a</sup> | 12.19 | 12.46 | 12.32 | 11.91 | 12.12 | 12.29 | 12.91 | 12.91 | 12.91 | 13.12 | 13.12 | 13.12 | 13.12 |
| #c02     | 11.00 <sup>a</sup> | 11.42 | 11.13 | 11.14 | 10.53 | 10.73 | 11.22 | 11.22 | 11.22 | 11.22 | 11.60 | 11.60 | 11.60 | 11.60 |
| #c03     | 10.60 <sup>a</sup> | 11.30 | 10.88 | 10.90 | 10.39 | 10.53 | 10.94 | 10.88 | 10.88 | 10.88 | 11.21 | 11.22 | 11.21 | 11.21 |
| #c16     | 10.20 <sup>a</sup> | 11.09 | 10.81 | 10.92 | 10.25 | 10.38 | 10.48 | 10.32 | 10.32 | 10.32 | 10.80 | 10.80 | 10.80 | 10.80 |
| #c52     | 10.00 <sup>a</sup> | 11.04 | 10.61 | 10.69 | 9.76  | 9.95  | 10.67 | 10.51 | 10.52 | 10.51 | 10.94 | 10.94 | 10.94 | 10.94 |
| #c53     | 9.60 <sup>a</sup>  | 10.91 | 10.39 | 10.48 | 9.59  | 9.73  | 10.35 | 10.23 | 10.23 | 10.23 | 10.60 | 10.61 | 10.60 | 10.60 |
| #c69     | 10.60 <sup>a</sup> | 11.49 | 11.33 | 11.34 | 10.27 | 10.55 | 11.40 | 11.31 | 11.31 | 11.31 | 11.79 | 11.79 | 11.79 | 11.79 |
| #c86     | 8.40 <sup>a</sup>  | 8.84  | 9.00  | 9.11  | 8.83  | 8.97  | 8.80  | 8.74  | 8.74  | 8.74  | 9.15  | 9.15  | 9.15  | 9.15  |
| #c87     | 8.90 <sup>a</sup>  | 9.14  | 9.32  | 9.38  | 9.54  | 9.55  | 9.12  | 9.03  | 9.03  | 9.03  | 9.45  | 9.45  | 9.45  | 9.45  |
| #c89     | 10.10 <sup>a</sup> | 11.04 | 10.78 | 10.63 | 10.20 | 10.35 | 10.85 | 11.03 | 11.03 | 11.03 | 11.26 | 11.26 | 11.26 | 11.26 |
| #c90     | 10.20 <sup>a</sup> | 10.88 | 10.72 | 10.71 | 10.24 | 10.30 | 10.51 | 10.62 | 10.62 | 10.62 | 10.94 | 10.94 | 10.94 | 10.94 |
| #c92     | 9.80 <sup>a</sup>  | 10.80 | 10.57 | 10.60 | 10.08 | 10.16 | 10.28 | 10.27 | 10.27 | 10.27 | 10.65 | 10.65 | 10.65 | 10.65 |
| #c99     | 9.90 <sup>a</sup>  | 10.40 | 10.38 | 10.42 | 10.04 | 10.12 | 10.31 | 10.30 | 10.30 | 10.30 | 10.63 | 10.64 | 10.63 | 10.63 |
| #c100    | 10.60 <sup>a</sup> | 10.68 | 10.66 | 10.57 | 10.09 | 10.26 | 10.20 | 10.57 | 10.57 | 10.57 | 10.75 | 10.75 | 10.75 | 10.75 |
| #c101    | 9.70 <sup>a</sup>  | 9.70  | 10.00 | 10.05 | 10.06 | 10.17 | 9.93  | 9.93  | 9.93  | 9.94  | 10.26 | 10.26 | 10.27 | 10.27 |
| #c103    | 10.80 <sup>a</sup> | 11.70 | 12.02 | 11.71 | 11.68 | 11.54 | 11.47 | 11.72 | 11.72 | 11.72 | 12.07 | 12.07 | 12.07 | 12.07 |
| #c104    | 9.70 <sup>a</sup>  | 10.76 | 10.67 | 10.77 | 10.26 | 10.24 | 10.18 | 10.31 | 10.31 | 10.31 | 10.67 | 10.67 | 10.67 | 10.67 |
| #c116    | 8.40 <sup>a</sup>  | 10.78 | 10.74 | 10.89 | 10.44 | 10.42 | 10.18 | 10.30 | 10.31 | 10.31 | 10.68 | 10.69 | 10.69 | 10.69 |
| #c124    | 11.50 <sup>a</sup> | 11.74 | 11.82 | 11.56 | 11.58 | 11.53 | 11.52 | 11.72 | 11.72 | 11.72 | 12.12 | 12.12 | 12.12 | 12.12 |
| #c125    | 10.80 <sup>a</sup> | 11.57 | 11.62 | 11.44 | 11.41 | 11.30 | 11.15 | 11.33 | 11.33 | 11.33 | 11.76 | 11.76 | 11.76 | 11.76 |
| #c126    | 10.50 <sup>a</sup> | 11.52 | 11.50 | 11.35 | 11.26 | 11.18 | 10.98 | 11.07 | 11.07 | 11.07 | 11.49 | 11.49 | 11.49 | 11.49 |
| #c131    | 11.20 <sup>a</sup> | 11.64 | 11.77 | 11.60 | 11.31 | 11.25 | 10.97 | 11.41 | 11.41 | 11.41 | 11.62 | 11.61 | 11.62 | 11.62 |
| #c135    | 9.80 <sup>a</sup>  | 9.77  | 10.08 | 10.13 | 10.19 | 10.26 | 10.01 | 10.08 | 10.08 | 10.08 | 10.34 | 10.34 | 10.34 | 10.34 |
| #c136    | 11.00 <sup>a</sup> | 11.61 | 11.57 | 11.35 | 11.22 | 11.13 | 11.27 | 11.24 | 11.24 | 11.24 | 11.70 | 11.70 | 11.70 | 11.70 |
| #c158    | 10.60 <sup>a</sup> | 11.40 | 11.37 | 11.29 | 11.19 | 11.04 | 10.86 | 10.96 | 10.96 | 10.96 | 11.39 | 11.39 | 11.39 | 11.39 |
| #c162    | 10.60 <sup>a</sup> | 10.68 | 10.89 | 10.77 | 9.64  | 9.77  | 10.57 | 10.73 | 10.73 | 10.72 | 11.16 | 11.20 | 11.19 | 11.19 |
| #c164    | 12.80 <sup>a</sup> | 12.70 | 13.10 | 12.69 | 11.53 | 12.64 | 12.13 | 12.85 | 12.85 | 12.85 | 13.27 | 13.27 | 13.27 | 13.27 |

... continued on next page ...

Table S23: . . . continued from previous page . . .

| Molecule | Ref.               | MNDO  | AM1   | PM3   | PM6   | PM7   | OM1   |       |       | OM2   |       |       | OM3   |       |       |
|----------|--------------------|-------|-------|-------|-------|-------|-------|-------|-------|-------|-------|-------|-------|-------|-------|
|          |                    |       |       |       |       |       | D2    | D3    | D3T   | D2    | D3    | D3T   | D2    | D3    | D3T   |
| #c165    | 14.00 <sup>a</sup> | 13.43 | 13.31 | 13.03 | 12.02 | 12.33 | 13.32 | 13.60 | 13.60 | 13.60 | 13.60 | 13.60 | 13.68 | 13.68 | 13.68 |
| #c166    | 13.80 <sup>a</sup> | 12.79 | 13.21 | 12.73 | 12.99 | 12.76 | 12.67 | 13.27 | 13.27 | 13.27 | 13.27 | 13.27 | 13.57 | 13.57 | 13.57 |
| #c167    | 9.60 <sup>a</sup>  | 9.29  | 9.60  | 9.46  | 9.86  | 9.89  | 9.39  | 9.75  | 9.75  | 9.74  | 9.75  | 9.75  | 9.97  | 9.97  | 9.97  |
| #c205    | 10.60 <sup>a</sup> | 11.46 | 11.41 | 11.27 | 11.07 | 10.94 | 10.94 | 10.90 | 10.90 | 10.90 | 10.90 | 10.90 | 11.39 | 11.39 | 11.39 |
| #d12     | 11.30 <sup>a</sup> | 11.54 | 11.98 | 12.17 | 11.43 | 11.24 | 11.16 | 11.84 | 11.84 | 11.84 | 11.84 | 11.84 | 11.74 | 11.74 | 11.74 |
| #d24     | 11.00 <sup>a</sup> | 11.41 | 11.19 | 10.64 | 10.15 | 10.42 | 10.60 | 10.97 | 10.97 | 10.98 | 10.98 | 10.98 | 11.06 | 11.06 | 11.06 |
| #d31     | 11.60 <sup>a</sup> | 11.10 | 11.24 | 10.59 | 11.23 | 11.19 | 10.93 | 11.34 | 11.34 | 11.34 | 11.34 | 11.34 | 11.43 | 11.43 | 11.43 |
| #d37     | 8.10 <sup>a</sup>  | 10.94 | 10.20 | 9.88  | 10.08 | 10.01 | 10.29 | 9.92  | 9.92  | 9.92  | 9.92  | 9.92  | 10.07 | 10.07 | 10.07 |

<sup>a</sup> Taken from the experimental data quoted in: J.J.P.Stewart, J.Comput.Chem. 10, 221 (1989).

Table S24: Benchmark Results for the PM7-CHNOF Data Set. Heats of Formation (kcal/mol). Numbering of Molecules Is from the Web Database; If Several Entries for the Same Molecule Are Given Under Different Numbers, We Assign the Lowest Number to This Molecule. Molecules #704, 732, 1495, 943 and 1246 from PM7 Database Were Excluded from the Analysis as No References Were Provided on the Web Database for Indicated Heats of Formation of 0.0 kcal/mol. Enthalpy of Formic Acid Dimer #1376 ( $-13.9$  kcal/mol, #1377 in the Web Database) Given in the Web Database Does not Correspond to Its Heat of Formation, but to Dimerization of Formic Acid. Heat of Formation of Formic Acid Dimer Is Thus Calculated as  $\Delta H_f = -13.9 + 2\Delta H_f(\text{formic acid})$ , Where Heat of Formation of Formic Acid  $\Delta H_f(\text{formic acid}) = -90.5$  kcal/mol Is Taken from #1052 Entry of the Same Web Database.

| Molecule | Ref.               | MNDO  | AM1   | PM3   | PM6   | PM7   | OM1   | OM2   |       | OM3   |       | D3T   |
|----------|--------------------|-------|-------|-------|-------|-------|-------|-------|-------|-------|-------|-------|
|          |                    |       |       |       |       |       |       | D2    | D3    | D2    | D3    |       |
| #3       | 0.0 <sup>a</sup>   | 0.7   | -5.2  | -13.4 | -25.7 | -32.0 | 2.6   | -3.4  | -3.5  | -0.0  | -0.1  | -0.1  |
| #588     | 0.0 <sup>a</sup>   | 8.3   | 11.2  | 17.6  | 40.6  | 33.0  | -4.4  | 2.8   | 2.6   | 2.6   | 2.6   | 2.2   |
| #1029    | 0.0 <sup>a</sup>   | -15.3 | -27.0 | -4.2  | -16.8 | -8.5  | -7.1  | 2.0   | 1.9   | -2.6  | -2.6  | -2.8  |
| #1030    | 22.0 <sup>a</sup>  | 12.1  | 0.7   | 18.4  | 41.7  | 25.7  | 22.0  | 29.4  | 29.3  | 25.9  | 25.9  | 25.7  |
| #1532    | 0.0 <sup>a</sup>   | 7.3   | -22.5 | -21.7 | 0.3   | -15.9 | 12.3  | 0.6   | 0.5   | -1.7  | -1.7  | -1.8  |
| #49      | 99.8 <sup>a</sup>  | 107.4 | 110.9 | 113.2 | 105.9 | 102.9 | 103.9 | 103.8 | 103.7 | 101.3 | 101.2 | 100.8 |
| #50      | 99.8 <sup>a</sup>  | 77.3  | 80.8  | 75.6  | 75.2  | 79.6  | 91.3  | 91.9  | 91.6  | 90.3  | 90.1  | 89.8  |
| #54      | -17.9 <sup>a</sup> | -11.9 | -8.8  | -13.0 | -12.3 | -14.4 | -13.8 | -19.3 | -19.9 | -18.0 | -18.4 | -19.1 |
| #60      | 54.3 <sup>a</sup>  | 57.9  | 54.8  | 50.7  | 56.7  | 57.1  | 53.6  | 54.2  | 53.9  | 54.7  | 54.6  | 53.7  |
| #64      | 12.4 <sup>a</sup>  | 15.4  | 16.5  | 16.6  | 15.7  | 13.9  | 11.9  | 12.9  | 11.7  | 13.9  | 13.4  | 12.0  |
| #69      | -20.0 <sup>a</sup> | -19.7 | -17.4 | -18.1 | -15.8 | -18.2 | -20.3 | -21.2 | -22.8 | -20.8 | -21.9 | -23.6 |
| #84      | 45.6 <sup>a</sup>  | 43.9  | 46.1  | 47.1  | 37.5  | 36.9  | 45.4  | 45.9  | 44.3  | 45.5  | 44.9  | 42.9  |
| #85      | 66.2 <sup>a</sup>  | 68.3  | 74.8  | 68.2  | 60.9  | 63.2  | 62.8  | 67.4  | 65.9  | 65.5  | 64.7  | 62.8  |
| #88      | 44.4 <sup>a</sup>  | 41.4  | 43.4  | 40.2  | 45.4  | 46.0  | 45.0  | 44.5  | 43.3  | 44.1  | 43.5  | 41.5  |
| #93      | 12.7 <sup>a</sup>  | 11.2  | 17.8  | 16.3  | 11.2  | 12.0  | 7.2   | 9.9   | 7.6   | 10.1  | 8.7   | 6.3   |
| #96      | 4.9 <sup>a</sup>   | 5.0   | 6.6   | 6.4   | 5.6   | 4.2   | 4.4   | 4.7   | 2.6   | 5.0   | 3.5   | 1.1   |
| #99      | -24.8 <sup>a</sup> | -24.9 | -24.3 | -23.6 | -21.0 | -23.1 | -25.2 | -25.5 | -28.7 | -25.4 | -27.9 | -30.4 |
| #105     | 113.0 <sup>a</sup> | 103.2 | 106.1 | 102.5 | 110.9 | 112.7 | 117.6 | 118.0 | 116.6 | 116.1 | 115.7 | 113.7 |
| #109     | 72.8 <sup>a</sup>  | 65.6  | 67.9  | 66.4  | 69.1  | 69.7  | 70.6  | 71.2  | 69.5  | 71.2  | 70.3  | 67.6  |
| #115     | 51.9 <sup>a</sup>  | 64.1  | 78.1  | 69.2  | 59.5  | 65.5  | 59.0  | 62.0  | 58.9  | 59.9  | 57.9  | 55.2  |
| #117     | 34.7 <sup>a</sup>  | 24.9  | 32.0  | 29.8  | 35.1  | 35.3  | 36.5  | 35.1  | 33.0  | 33.8  | 32.6  | 29.6  |
| #121     | 26.0 <sup>a</sup>  | 29.0  | 29.9  | 31.0  | 28.5  | 27.2  | 28.2  | 29.4  | 26.8  | 30.3  | 28.6  | 25.5  |
| #125     | -0.2 <sup>a</sup>  | -0.2  | 0.2   | 1.4   | 1.2   | -0.3  | -0.7  | 0.1   | -3.6  | 0.3   | -2.4  | -5.7  |
| #127     | 6.8 <sup>a</sup>   | -11.9 | -1.0  | -3.8  | -3.5  | -2.3  | -1.9  | 3.0   | -1.1  | 2.9   | -0.0  | -3.3  |
| #129     | -4.3 <sup>a</sup>  | -2.0  | -1.2  | -3.3  | -5.1  | -5.6  | -0.4  | -4.3  | -8.0  | -3.9  | -6.7  | -10.0 |
| #131     | -3.0 <sup>a</sup>  | -5.1  | -3.3  | -3.8  | -3.5  | -5.1  | -3.1  | -3.8  | -7.2  | -4.0  | -6.4  | -9.8  |
| #135     | -30.4 <sup>a</sup> | -29.7 | -31.1 | -29.1 | -26.0 | -28.2 | -30.4 | -30.1 | -34.9 | -30.3 | -34.1 | -37.5 |
| #136     | -32.4 <sup>a</sup> | -26.8 | -29.4 | -29.5 | -27.5 | -28.9 | -28.3 | -31.8 | -37.0 | -31.3 | -35.5 | -38.8 |
| #146     | 32.1 <sup>a</sup>  | 32.1  | 37.1  | 31.8  | 32.1  | 32.3  | 33.3  | 33.3  | 29.9  | 32.6  | 30.7  | 26.2  |
| #156     | 44.3 <sup>a</sup>  | 33.7  | 50.5  | 43.1  | 33.2  | 38.5  | 38.4  | 42.8  | 38.2  | 41.0  | 38.1  | 34.3  |
| #167     | -40.3 <sup>a</sup> | -24.6 | -32.8 | -35.8 | -35.0 | -35.5 | -29.3 | -39.6 | -47.2 | -37.6 | -44.1 | -48.1 |
| #173     | 19.8 <sup>a</sup>  | 21.3  | 22.0  | 23.5  | 24.2  | 23.0  | 17.1  | 18.8  | 14.6  | 18.5  | 16.4  | 10.6  |
| #175     | 47.5 <sup>a</sup>  | 53.7  | 62.7  | 56.2  | 53.7  | 55.1  | 59.6  | 56.9  | 52.9  | 57.4  | 55.1  | 49.9  |

... continued on next page ...



Table S24: . . . continued from previous page . . .

| Molecule | Ref.               | MNDO  | AMI   | PM3   | PM6   | PM7   | OM1   | OM2   |       | OM3   |       | D3T   |
|----------|--------------------|-------|-------|-------|-------|-------|-------|-------|-------|-------|-------|-------|
|          |                    |       |       |       |       |       |       | D2    | D3    | D2    | D3    |       |
| #165     | -36.8 <sup>a</sup> | -30.0 | -35.4 | -34.2 | -31.7 | -33.5 | -32.6 | -35.9 | -43.0 | -42.5 | -42.4 | -45.4 |
| #166     | -35.1 <sup>a</sup> | -34.4 | -38.0 | -34.5 | -31.0 | -33.3 | -35.5 | -34.7 | -41.1 | -40.8 | -40.8 | -44.6 |
| #171     | 74.3 <sup>a</sup>  | 78.1  | 79.5  | 77.3  | 74.7  | 75.7  | 71.6  | 71.5  | 67.8  | 67.0  | 67.0  | 63.2  |
| #176     | 40.1 <sup>a</sup>  | 42.6  | 42.9  | 45.1  | 41.2  | 40.0  | 43.4  | 44.8  | 40.4  | 39.7  | 39.7  | 37.9  |
| #177     | 41.1 <sup>a</sup>  | 43.9  | 44.0  | 45.6  | 42.1  | 41.1  | 45.4  | 46.7  | 42.1  | 41.5  | 41.5  | 39.5  |
| #178     | 25.4 <sup>a</sup>  | 14.5  | 17.5  | 20.4  | 19.3  | 20.2  | 22.3  | 26.8  | 21.4  | 20.0  | 20.0  | 15.6  |
| #179     | 25.0 <sup>a</sup>  | 14.4  | 17.0  | 19.4  | 18.7  | 20.0  | 22.7  | 26.8  | 21.4  | 21.0  | 21.0  | 15.8  |
| #180     | 19.8 <sup>a</sup>  | 6.4   | 26.9  | 16.2  | 12.1  | 16.5  | 25.4  | 21.4  | 15.5  | 15.3  | 15.3  | 11.7  |
| #181     | 20.1 <sup>a</sup>  | 19.6  | 17.8  | 21.1  | 18.4  | 17.2  | 18.6  | 21.0  | 15.3  | 14.9  | 14.9  | 11.9  |
| #182     | -1.0 <sup>a</sup>  | -10.2 | -5.6  | -7.0  | -5.5  | -4.8  | -2.6  | -2.8  | -9.0  | -9.2  | -9.2  | -13.7 |
| #183     | 2.3 <sup>a</sup>   | -3.7  | -2.0  | -2.6  | -1.2  | -0.5  | -0.4  | -0.2  | -6.8  | -6.9  | -6.8  | -10.9 |
| #184     | 3.5 <sup>a</sup>   | -3.1  | -2.3  | -3.0  | -1.5  | -0.8  | -0.4  | -0.4  | -7.1  | -7.1  | -7.1  | -11.3 |
| #185     | 30.9 <sup>a</sup>  | 28.6  | 39.5  | 36.1  | 25.0  | 29.5  | 26.9  | 30.7  | 24.2  | 24.7  | 24.7  | 21.0  |
| #188     | 177.0 <sup>a</sup> | 186.9 | 174.2 | 186.1 | 175.9 | 178.1 | 173.0 | 171.1 | 163.1 | 163.6 | 163.7 | 168.0 |
| #189     | -10.1 <sup>a</sup> | -9.8  | -13.5 | -9.4  | -8.8  | -10.4 | -10.9 | -9.1  | -16.1 | -16.0 | -16.0 | -19.9 |
| #190     | -15.7 <sup>a</sup> | -7.2  | -10.6 | -12.4 | -13.7 | -14.8 | -7.9  | -14.8 | -22.6 | -22.4 | -22.3 | -25.0 |
| #191     | -16.8 <sup>a</sup> | -13.2 | -16.3 | -21.9 | -19.8 | -21.4 | -9.9  | -19.8 | -27.4 | -27.3 | -27.2 | -30.2 |
| #192     | -14.8 <sup>a</sup> | -14.5 | -15.1 | -15.5 | -16.2 | -18.1 | -10.4 | -15.0 | -22.6 | -22.4 | -22.4 | -25.8 |
| #193     | -11.8 <sup>a</sup> | -5.8  | -11.0 | -9.3  | -9.9  | -11.3 | -8.7  | -10.8 | -18.5 | -18.3 | -18.2 | -21.4 |
| #196     | -44.3 <sup>a</sup> | -26.0 | -37.6 | -39.6 | -38.0 | -39.1 | -32.6 | -42.8 | -52.7 | -51.7 | -51.6 | -54.0 |
| #197     | -42.5 <sup>a</sup> | -27.7 | -38.8 | -39.2 | -36.4 | -38.1 | -34.0 | -41.1 | -50.7 | -49.8 | -49.7 | -52.8 |
| #198     | -41.7 <sup>a</sup> | -34.6 | -42.2 | -40.0 | -36.7 | -38.7 | -37.7 | -40.4 | -49.2 | -48.6 | -48.5 | -52.5 |
| #199     | -41.1 <sup>a</sup> | -33.0 | -41.3 | -39.1 | -35.7 | -37.8 | -36.7 | -39.9 | -49.0 | -48.2 | -48.2 | -52.0 |
| #200     | -39.9 <sup>a</sup> | -39.1 | -44.8 | -39.9 | -36.0 | -38.4 | -40.7 | -39.2 | -47.3 | -46.9 | -46.9 | -51.6 |
| #203     | 212.0 <sup>a</sup> | 218.0 | 222.1 | 227.4 | 224.5 | 225.6 | 215.2 | 214.6 | 209.2 | 208.4 | 208.4 | 212.0 |
| #204     | 209.0 <sup>a</sup> | 207.7 | 210.4 | 221.0 | 215.5 | 218.4 | 200.5 | 206.2 | 200.6 | 200.0 | 200.0 | 201.4 |
| #205     | 43.2 <sup>a</sup>  | 33.8  | 38.3  | 42.5  | 37.4  | 38.6  | 44.0  | 46.7  | 40.1  | 39.7  | 39.8  | 35.4  |
| #206     | 59.7 <sup>a</sup>  | 62.9  | 67.7  | 58.8  | 57.0  | 59.1  | 59.5  | 51.8  | 45.0  | 44.8  | 44.8  | 41.1  |
| #207     | 12.0 <sup>a</sup>  | 13.6  | 14.4  | 14.1  | 14.2  | 13.2  | 12.2  | 9.5   | 3.6   | 2.9   | 2.9   | -0.6  |
| #208     | -9.9 <sup>a</sup>  | -18.6 | -13.6 | -16.9 | -14.8 | -14.1 | -8.1  | -12.1 | -20.3 | -20.3 | -20.3 | -25.0 |
| #209     | -6.0 <sup>a</sup>  | -13.9 | -11.4 | -11.3 | -9.3  | -9.0  | -7.1  | -6.9  | -15.1 | -15.1 | -15.1 | -20.2 |
| #210     | -19.4 <sup>a</sup> | -17.0 | -17.8 | -14.4 | -14.0 | -13.2 | -8.7  | -9.2  | -18.1 | -17.8 | -17.8 | -23.3 |
| #211     | -12.4 <sup>a</sup> | -10.4 | -14.4 | -13.7 | -10.6 | -9.3  | -10.8 | -12.5 | -22.5 | -21.6 | -21.5 | -26.3 |
| #212     | -33.0 <sup>a</sup> | -30.0 | -36.9 | -35.9 | -33.9 | -32.8 | -29.8 | -34.4 | -45.4 | -44.4 | -44.3 | -49.1 |
| #213     | -31.0 <sup>a</sup> | -32.3 | -37.3 | -33.9 | -31.4 | -30.8 | -30.8 | -31.7 | -42.7 | -41.6 | -41.6 | -46.6 |
| #214     | -32.7 <sup>a</sup> | -34.5 | -39.2 | -35.9 | -33.3 | -32.7 | -32.6 | -33.9 | -44.3 | -43.5 | -43.4 | -48.5 |
| #215     | -31.9 <sup>a</sup> | -35.2 | -39.3 | -35.9 | -33.5 | -32.6 | -32.6 | -33.7 | -43.9 | -43.1 | -43.1 | -48.2 |
| #216     | -14.9 <sup>a</sup> | -14.5 | -20.4 | -14.8 | -13.9 | -15.6 | -16.2 | -13.7 | -22.3 | -22.1 | -22.1 | -27.0 |
| #217     | -30.4 <sup>a</sup> | -36.6 | -40.3 | -34.9 | -31.3 | -31.2 | -33.6 | -31.1 | -41.2 | -40.5 | -40.5 | -46.1 |
| #218     | -37.0 <sup>a</sup> | -36.2 | -43.7 | -36.9 | -34.2 | -33.9 | -34.7 | -33.9 | -44.8 | -43.7 | -43.7 | -49.5 |
| #219     | -48.7 <sup>a</sup> | -22.1 | -40.2 | -43.8 | -41.9 | -43.1 | -33.0 | -47.5 | -60.2 | -58.7 | -58.6 | -60.9 |
| #220     | -49.3 <sup>a</sup> | -30.3 | -44.4 | -45.4 | -43.1 | -44.4 | -37.6 | -47.3 | -58.9 | -57.8 | -57.7 | -61.1 |
| #221     | -47.6 <sup>a</sup> | -31.9 | -44.7 | -43.3 | -40.4 | -42.4 | -38.3 | -44.8 | -56.6 | -55.5 | -55.4 | -59.5 |
| #222     | -48.3 <sup>a</sup> | -34.5 | -46.4 | -45.0 | -42.0 | -43.3 | -39.0 | -44.7 | -55.9 | -55.0 | -54.9 | -59.4 |
| #223     | -46.6 <sup>a</sup> | -39.2 | -49.1 | -45.4 | -41.7 | -43.8 | -42.9 | -45.0 | -55.5 | -54.7 | -54.6 | -59.7 |

. . . continued on next page . . .



Table S24: . . . continued from previous page . . .

| Molecule | Ref.               | MNDO  | AMI   | PM3   | PM6   | PM7   | OM1   | OM2   |       | OM3   |       | D3T   |       |
|----------|--------------------|-------|-------|-------|-------|-------|-------|-------|-------|-------|-------|-------|-------|
|          |                    |       |       |       |       |       |       | D2    | D3    | D2    | D3    |       |       |
| #224     | -48.2 <sup>a</sup> | -26.9 | -42.3 | -43.7 | -40.8 | -42.4 | -35.2 | -45.7 | -57.9 | -56.6 | -43.5 | -54.3 | -59.6 |
| #225     | -45.3 <sup>a</sup> | -35.2 | -46.5 | -44.2 | -39.4 | -41.8 | -40.2 | -42.5 | -53.8 | -52.8 | -42.5 | -52.1 | -57.8 |
| #226     | -46.0 <sup>a</sup> | -37.5 | -48.1 | -44.6 | -40.8 | -43.0 | -41.8 | -44.4 | -55.2 | -54.3 | -44.4 | -53.5 | -59.1 |
| #227     | -44.8 <sup>a</sup> | -43.8 | -51.7 | -45.3 | -41.0 | -43.5 | -45.8 | -43.8 | -53.6 | -53.0 | -44.8 | -52.8 | -58.7 |
| #228     | 148.7 <sup>a</sup> | 99.1  | 151.2 | 113.8 | 106.5 | 125.6 | 147.6 | 144.6 | 136.6 | 137.2 | 146.4 | 141.3 | 134.8 |
| #229     | 70.7 <sup>a</sup>  | 56.2  | 63.5  | 66.7  | 58.4  | 59.6  | 72.0  | 75.2  | 67.9  | 67.2  | 73.9  | 69.3  | 61.6  |
| #230     | 35.3 <sup>a</sup>  | 37.6  | 38.7  | 39.2  | 37.9  | 36.7  | 37.1  | 34.7  | 28.2  | 27.3  | 35.6  | 31.6  | 24.1  |
| #231     | 7.2 <sup>a</sup>   | 8.8   | 8.7   | 9.5   | 10.2  | 8.5   | 7.1   | 4.8   | -2.9  | -3.5  | 5.0   | -0.0  | -7.7  |
| #232     | 4.1 <sup>a</sup>   | 5.9   | 6.9   | 4.8   | 4.0   | 3.4   | 7.3   | 0.2   | -7.3  | -8.0  | 0.7   | -4.2  | -11.9 |
| #233     | 4.6 <sup>a</sup>   | 8.3   | 7.4   | 5.5   | 5.7   | 4.3   | 8.2   | 0.3   | -7.7  | -8.2  | 1.3   | -4.1  | -11.7 |
| #234     | 4.3 <sup>a</sup>   | 5.7   | 6.8   | 4.7   | 4.7   | 3.7   | 7.3   | 0.3   | -7.2  | -7.8  | 0.8   | -4.1  | -11.8 |
| #235     | 13.7 <sup>a</sup>  | 11.4  | 10.5  | 16.9  | 12.8  | 13.7  | 20.1  | 24.8  | 14.3  | 14.6  | 23.2  | 15.1  | 7.9   |
| #236     | 16.6 <sup>a</sup>  | 13.2  | 9.8   | 14.9  | 12.2  | 13.0  | 16.9  | 18.7  | 9.1   | 9.2   | 18.3  | 11.4  | 3.9   |
| #237     | 19.3 <sup>a</sup>  | 17.1  | 10.1  | 14.0  | 20.9  | 21.2  | 18.9  | 20.9  | 11.7  | 11.9  | 19.8  | 12.5  | 6.2   |
| #238     | -4.6 <sup>a</sup>  | -2.5  | -3.8  | -8.4  | -9.2  | -10.3 | 5.0   | -3.9  | -13.2 | -13.4 | -3.4  | -10.7 | -17.8 |
| #239     | 15.2 <sup>a</sup>  | 5.4   | 5.5   | 9.0   | 15.5  | 15.6  | 15.5  | 16.0  | 7.5   | 7.5   | 14.2  | 7.8   | 1.2   |
| #240     | -0.5 <sup>a</sup>  | -2.3  | -0.5  | -4.2  | -6.3  | -8.4  | 6.3   | -2.6  | -12.4 | -12.5 | -1.5  | -9.2  | -16.4 |
| #241     | 0.7 <sup>a</sup>   | -2.2  | 0.1   | -5.4  | -6.7  | -9.0  | 6.2   | -3.1  | -12.6 | -12.9 | -1.8  | -9.5  | -16.8 |
| #242     | -0.9 <sup>a</sup>  | -1.9  | -0.4  | -4.7  | -7.0  | -9.5  | 6.4   | -2.7  | -13.2 | -13.6 | -2.1  | -10.1 | -17.4 |
| #243     | 14.9 <sup>a</sup>  | 4.8   | 6.5   | 9.7   | 16.2  | 16.2  | 15.5  | 15.5  | 7.2   | 7.1   | 14.2  | 8.0   | 1.3   |
| #244     | 14.4 <sup>a</sup>  | 4.7   | 6.4   | 9.8   | 15.8  | 16.0  | 15.2  | 15.2  | 6.9   | 6.8   | 14.0  | 7.8   | 1.1   |
| #245     | -24.1 <sup>a</sup> | -26.3 | -36.0 | -27.8 | -25.5 | -23.3 | -24.3 | -22.2 | -35.1 | -33.7 | -23.4 | -32.8 | -40.5 |
| #246     | -23.7 <sup>a</sup> | -26.3 | -36.0 | -27.8 | -25.5 | -23.3 | -24.3 | -22.2 | -35.2 | -33.7 | -23.4 | -32.8 | -40.6 |
| #247     | -19.8 <sup>a</sup> | -19.2 | -27.2 | -19.9 | -18.9 | -20.7 | -21.4 | -18.3 | -28.5 | -28.2 | -19.1 | -27.2 | -34.0 |
| #248     | -41.0 <sup>a</sup> | -39.4 | -49.7 | -41.7 | -38.3 | -38.5 | -39.0 | -38.0 | -50.9 | -49.6 | -38.9 | -49.2 | -56.3 |
| #249     | -54.0 <sup>a</sup> | -12.7 | -40.8 | -48.0 | -46.6 | -47.4 | -31.0 | -53.4 | -69.3 | -67.2 | -48.1 | -62.5 | -68.3 |
| #250     | -53.8 <sup>a</sup> | -12.6 | -40.8 | -47.8 | -46.6 | -47.4 | -30.3 | -53.4 | -69.3 | -67.2 | -48.1 | -62.5 | -68.3 |
| #251     | -52.6 <sup>a</sup> | -24.4 | -46.0 | -48.9 | -46.2 | -47.7 | -36.9 | -51.3 | -66.1 | -64.4 | -48.3 | -61.3 | -67.5 |
| #252     | -53.6 <sup>a</sup> | -29.1 | -47.7 | -50.5 | -48.2 | -49.2 | -38.6 | -51.6 | -65.8 | -64.3 | -49.4 | -61.8 | -68.1 |
| #253     | -53.7 <sup>a</sup> | -35.0 | -51.2 | -50.8 | -48.1 | -49.6 | -42.7 | -51.8 | -65.2 | -63.9 | -50.3 | -61.8 | -68.2 |
| #254     | -51.7 <sup>a</sup> | -22.2 | -44.8 | -47.7 | -44.7 | -46.3 | -35.5 | -50.2 | -65.2 | -63.4 | -46.9 | -60.3 | -66.4 |
| #255     | -52.0 <sup>a</sup> | -28.8 | -46.6 | -47.5 | -44.5 | -45.7 | -38.2 | -48.3 | -62.8 | -61.3 | -46.7 | -59.4 | -65.6 |
| #256     | -51.1 <sup>a</sup> | -36.4 | -51.5 | -48.7 | -45.4 | -47.6 | -43.4 | -49.4 | -62.9 | -61.6 | -48.6 | -60.3 | -66.6 |
| #257     | -52.4 <sup>a</sup> | -37.4 | -52.2 | -50.4 | -46.6 | -48.6 | -43.8 | -50.1 | -63.3 | -62.2 | -49.4 | -60.8 | -67.3 |
| #258     | -53.2 <sup>a</sup> | -39.3 | -53.3 | -50.7 | -47.4 | -49.2 | -44.9 | -50.7 | -63.5 | -62.4 | -50.2 | -61.2 | -67.6 |
| #259     | -51.5 <sup>a</sup> | -44.0 | -55.9 | -50.8 | -46.7 | -48.9 | -48.0 | -49.5 | -61.7 | -60.8 | -50.0 | -60.1 | -66.8 |
| #260     | -52.6 <sup>a</sup> | -31.1 | -49.0 | -48.9 | -45.9 | -47.7 | -40.2 | -50.2 | -64.1 | -62.7 | -48.3 | -60.5 | -66.7 |
| #261     | -50.9 <sup>a</sup> | -31.5 | -49.4 | -48.9 | -44.4 | -46.5 | -41.2 | -48.1 | -61.7 | -60.4 | -47.0 | -58.6 | -65.2 |
| #262     | -50.4 <sup>a</sup> | -39.7 | -53.3 | -49.7 | -44.6 | -47.1 | -45.3 | -47.0 | -60.0 | -59.0 | -47.3 | -58.4 | -64.9 |
| #263     | -50.5 <sup>a</sup> | -31.5 | -49.3 | -47.7 | -43.9 | -46.4 | -40.7 | -47.3 | -61.1 | -59.8 | -46.4 | -58.3 | -64.8 |
| #264     | -51.4 <sup>a</sup> | -25.6 | -45.7 | -46.9 | -42.8 | -44.5 | -36.5 | -46.7 | -61.5 | -59.8 | -44.5 | -57.5 | -63.7 |
| #265     | -50.8 <sup>a</sup> | -42.2 | -54.9 | -50.1 | -45.8 | -48.2 | -46.9 | -49.0 | -61.4 | -60.4 | -49.2 | -59.7 | -66.3 |
| #266     | -50.7 <sup>a</sup> | -42.0 | -54.9 | -50.1 | -45.8 | -48.2 | -46.9 | -49.0 | -61.4 | -60.4 | -49.2 | -59.7 | -66.3 |
| #267     | -49.9 <sup>a</sup> | -48.5 | -58.5 | -50.7 | -46.0 | -48.6 | -51.0 | -48.3 | -59.8 | -59.0 | -49.7 | -59.0 | -65.8 |
| #270     | 28.3 <sup>a</sup>  | 30.6  | 32.4  | 31.0  | 28.2  | 27.0  | 32.2  | 25.8  | 17.3  | 16.5  | 27.1  | 21.5  | 13.0  |

. . . continued on next page . . .

Table S24: . . . continued from previous page . . .

| Molecule | Ref.               | MNDO  | AMI   | PM3   | PM6   | PM7   | OM1   | OM2   |       | OM3   |       | D3T   |
|----------|--------------------|-------|-------|-------|-------|-------|-------|-------|-------|-------|-------|-------|
|          |                    |       |       |       |       |       |       | D2    | D3    | D2    | D3    |       |
| #271     | 36.0 <sup>a</sup>  | 37.7  | 44.3  | 42.4  | 35.9  | 37.5  | 35.8  | 34.8  | 26.2  | 25.7  | 25.8  | 21.2  |
| #272     | -51.5 <sup>a</sup> | -38.8 | -54.0 | -48.5 | -47.2 | -46.7 | -41.8 | -47.5 | -62.7 | -61.1 | -61.0 | -67.5 |
| #273     | -49.4 <sup>a</sup> | -37.6 | -52.5 | -47.3 | -46.0 | -45.4 | -40.1 | -45.8 | -61.5 | -59.8 | -59.6 | -66.0 |
| #274     | -55.4 <sup>a</sup> | -51.5 | -51.5 | -51.6 | -47.3 | -50.3 | -41.0 | -51.5 | -69.0 | -66.9 | -66.7 | -71.2 |
| #275     | -54.7 <sup>a</sup> | -53.3 | -65.4 | -56.2 | -51.0 | -53.7 | -56.1 | -52.9 | -66.0 | -65.1 | -65.1 | -72.9 |
| #278     | 73.5 <sup>a</sup>  | 72.1  | 84.4  | 81.3  | 76.2  | 79.1  | 86.9  | 83.4  | 75.1  | 74.0  | 74.0  | 68.1  |
| #281     | 134.3 <sup>a</sup> | 117.8 | 141.3 | 138.4 | 131.5 | 139.5 | 148.3 | 148.8 | 141.6 | 141.1 | 141.1 | 133.4 |
| #282     | 59.4 <sup>a</sup>  | 52.1  | 59.0  | 59.5  | 62.7  | 63.4  | 64.6  | 60.3  | 52.5  | 51.4  | 51.4  | 46.1  |
| #283     | 53.1 <sup>a</sup>  | 47.7  | 56.2  | 48.6  | 47.2  | 52.2  | 56.8  | 52.0  | 41.0  | 40.8  | 40.9  | 35.7  |
| #284     | 79.8 <sup>a</sup>  | 63.5  | 75.4  | 76.8  | 62.1  | 70.1  | 82.5  | 84.5  | 72.7  | 73.3  | 73.3  | 66.5  |
| #285     | 118.1 <sup>a</sup> | 103.1 | 117.4 | 114.9 | 115.1 | 117.7 | 139.5 | 129.8 | 123.1 | 121.9 | 121.9 | 115.4 |
| #286     | 74.0 <sup>a</sup>  | 54.2  | 89.0  | 71.5  | 62.2  | 71.5  | 81.8  | 73.7  | 64.5  | 64.2  | 64.2  | 59.6  |
| #287     | 85.1 <sup>a</sup>  | 67.9  | 71.6  | 79.8  | 61.3  | 61.8  | 85.5  | 87.9  | 76.7  | 76.3  | 76.4  | 67.7  |
| #288     | 72.3 <sup>a</sup>  | 65.2  | 77.5  | 71.3  | 56.2  | 64.1  | 75.6  | 71.3  | 60.1  | 60.4  | 60.5  | 55.5  |
| #289     | 6.2 <sup>a</sup>   | 1.4   | 0.2   | 4.1   | 4.2   | 4.7   | 6.4   | 3.2   | -8.2  | -8.4  | -8.3  | -14.7 |
| #290     | -4.2 <sup>a</sup>  | 4.8   | -1.3  | -0.0  | 0.6   | -1.5  | -0.1  | -5.7  | -17.7 | -17.9 | -17.8 | -22.9 |
| #291     | -5.2 <sup>a</sup>  | 3.8   | -2.4  | -1.2  | -1.2  | -2.8  | -0.8  | -6.1  | -18.1 | -18.3 | -18.3 | -23.7 |
| #292     | -8.6 <sup>a</sup>  | 1.0   | -5.0  | -11.2 | -9.9  | -11.9 | 2.7   | -15.3 | -27.5 | -27.6 | -27.6 | -31.3 |
| #293     | 19.9 <sup>a</sup>  | 20.2  | 30.3  | 17.4  | 14.8  | 16.1  | 37.5  | 18.9  | 7.4   | 6.9   | 7.0   | 2.9   |
| #294     | -10.3 <sup>a</sup> | -3.0  | -6.4  | -12.1 | -12.3 | -13.6 | 0.5   | -16.7 | -28.5 | -28.7 | -28.7 | -32.8 |
| #295     | -11.3 <sup>a</sup> | -4.6  | -7.1  | -12.5 | -12.3 | -13.9 | -0.6  | -17.8 | -29.7 | -29.9 | -29.9 | -33.9 |
| #296     | -5.4 <sup>a</sup>  | 15.5  | 3.6   | 0.3   | 0.1   | -1.4  | 5.9   | -7.8  | -20.7 | -20.5 | -20.5 | -23.8 |
| #297     | 3.0 <sup>a</sup>   | -10.6 | -8.5  | -7.4  | -5.5  | -0.6  | -1.0  | -2.0  | -16.4 | -15.4 | -15.3 | -22.2 |
| #298     | -5.9 <sup>a</sup>  | -6.4  | 0.4   | -11.9 | -11.9 | -11.6 | 6.7   | -10.3 | -23.5 | -23.5 | -23.4 | -28.2 |
| #299     | -31.9 <sup>a</sup> | -26.4 | -43.2 | -34.6 | -33.2 | -28.6 | -26.2 | -30.4 | -48.4 | -45.8 | -45.6 | -53.1 |
| #300     | -6.8 <sup>a</sup>  | 14.7  | 5.5   | -1.7  | -3.7  | -1.7  | 10.3  | -6.1  | -22.2 | -20.8 | -20.7 | -24.2 |
| #301     | -24.5 <sup>a</sup> | -38.7 | -40.4 | -35.0 | -31.3 | -26.5 | -29.1 | -28.5 | -44.8 | -43.1 | -43.0 | -50.6 |
| #302     | -26.5 <sup>a</sup> | -18.3 | -28.6 | -27.5 | -27.0 | -25.9 | -14.4 | -20.9 | -37.5 | -36.2 | -36.0 | -43.6 |
| #303     | -26.6 <sup>a</sup> | -23.7 | -32.3 | -29.4 | -29.6 | -29.2 | -19.7 | -26.5 | -41.6 | -40.8 | -40.7 | -47.3 |
| #304     | -40.5 <sup>a</sup> | -37.2 | -50.4 | -37.1 | -36.1 | -33.9 | -33.1 | -29.4 | -46.7 | -44.7 | -44.6 | -53.8 |
| #305     | -34.7 <sup>a</sup> | -37.1 | -49.7 | -42.3 | -39.3 | -37.1 | -35.0 | -36.5 | -53.8 | -51.9 | -51.7 | -59.4 |
| #306     | -43.5 <sup>a</sup> | -41.8 | -56.3 | -44.5 | -42.3 | -40.4 | -39.7 | -38.5 | -55.7 | -53.7 | -53.6 | -62.3 |
| #307     | -39.9 <sup>a</sup> | -10.8 | -29.0 | -34.0 | -35.9 | -36.8 | -19.2 | -39.7 | -56.0 | -54.9 | -54.8 | -57.6 |
| #308     | -30.3 <sup>a</sup> | -0.2  | -20.8 | -29.2 | -30.2 | -29.5 | -8.1  | -29.6 | -47.0 | -45.8 | -45.6 | -49.0 |
| #309     | -29.8 <sup>a</sup> | -28.6 | -40.9 | -31.1 | -28.9 | -30.9 | -31.5 | -27.4 | -40.9 | -40.3 | -40.3 | -48.2 |
| #310     | -51.0 <sup>a</sup> | -48.6 | -63.4 | -52.7 | -48.4 | -48.8 | -49.3 | -47.1 | -63.4 | -61.8 | -61.7 | -70.4 |
| #311     | -45.2 <sup>a</sup> | -50.6 | -60.9 | -51.2 | -46.4 | -46.6 | -44.6 | -44.8 | -59.9 | -58.8 | -58.8 | -67.4 |
| #312     | -68.0 <sup>a</sup> | -30.5 | -57.6 | -61.6 | -60.1 | -61.0 | -44.6 | -64.3 | -82.9 | -80.9 | -80.8 | -84.7 |
| #313     | -63.5 <sup>a</sup> | -11.7 | -49.5 | -55.8 | -52.2 | -53.9 | -35.5 | -58.3 | -79.2 | -76.4 | -76.2 | -78.9 |
| #314     | -59.7 <sup>a</sup> | -58.0 | -72.2 | -61.6 | -56.0 | -58.8 | -61.3 | -57.5 | -72.2 | -71.2 | -71.2 | -79.9 |
| #315     | -16.1 <sup>a</sup> | -2.4  | -11.1 | -19.2 | -18.2 | -19.9 | 0.2   | -23.2 | -37.5 | -37.5 | -37.4 | -41.3 |
| #316     | -50.3 <sup>a</sup> | -26.3 | -54.5 | -49.6 | -48.7 | -47.8 | -34.7 | -42.5 | -63.7 | -61.2 | -61.0 | -70.4 |
| #317     | -50.1 <sup>a</sup> | -55.3 | -67.7 | -56.6 | -51.4 | -51.7 | -54.2 | -49.3 | -66.1 | -64.9 | -64.8 | -74.4 |
| #318     | -55.9 <sup>a</sup> | -53.3 | -70.2 | -58.2 | -53.4 | -53.9 | -54.4 | -51.6 | -69.6 | -67.9 | -67.8 | -77.5 |
| #319     | -64.6 <sup>a</sup> | -62.7 | -79.1 | -67.0 | -61.1 | -63.9 | -66.4 | -62.0 | -78.4 | -77.3 | -77.3 | -87.0 |

. . . continued on next page . . .

Table S24: . . . continued from previous page . . .

| Molecule | Ref.               | MNDO  | AMI    | PM3   | PM6   | PM7   | OM1   | OM2   |        | OM3   |        | D3T    |
|----------|--------------------|-------|--------|-------|-------|-------|-------|-------|--------|-------|--------|--------|
|          |                    |       |        |       |       |       |       | D2    | D3     | D2    | D3     |        |
| #320     | 61.6 <sup>a</sup>  | 67.1  | 80.7   | 73.1  | 70.4  | 72.2  | 79.8  | 56.9  | 55.6   | 67.9  | 62.3   | 50.3   |
| #321     | 100.5 <sup>a</sup> | 94.8  | 120.4  | 109.8 | 98.3  | 106.3 | 113.6 | 94.3  | 93.3   | 103.2 | 98.1   | 87.1   |
| #322     | 37.4 <sup>a</sup>  | 33.1  | 42.6   | 38.8  | 36.9  | 38.5  | 44.4  | 33.9  | 21.5   | 34.3  | 27.5   | 15.3   |
| #325     | -18.5 <sup>a</sup> | 0.2   | -14.6  | -26.2 | -23.9 | -25.2 | 1.9   | -28.0 | -44.6  | -23.7 | -36.9  | -48.4  |
| #326     | -60.8 <sup>a</sup> | -58.0 | -77.1  | -63.6 | -58.4 | -59.0 | -59.5 | -56.2 | -74.0  | -58.2 | -74.2  | -84.6  |
| #327     | -69.2 <sup>a</sup> | -67.4 | -85.9  | -72.4 | -66.1 | -69.0 | -71.6 | -66.6 | -83.4  | -69.0 | -83.9  | -94.1  |
| #331     | 41.8 <sup>a</sup>  | 45.0  | 54.4   | 49.0  | 47.8  | 49.0  | 51.8  | 40.7  | 27.6   | 41.3  | 34.5   | 21.3   |
| #333     | -56.2 <sup>a</sup> | 32.6  | -33.3  | -49.9 | -52.2 | -49.5 | -10.0 | -49.7 | -76.3  | -41.3 | -70.1  | -79.2  |
| #334     | -74.4 <sup>a</sup> | -72.1 | -92.8  | -77.9 | -71.1 | -74.1 | -76.7 | -90.8 | -89.4  | -73.8 | -90.1  | -101.2 |
| #335     | 55.2 <sup>a</sup>  | 58.9  | 62.9   | 61.7  | 59.5  | 60.4  | 68.0  | 42.8  | 41.4   | 57.5  | 50.2   | 35.8   |
| #336     | 92.0 <sup>a</sup>  | 89.6  | 97.8   | 98.3  | 99.7  | 100.6 | 102.9 | 95.6  | 83.3   | 95.7  | 89.9   | 76.6   |
| #337     | 49.5 <sup>a</sup>  | 55.7  | 57.4   | 55.0  | 54.3  | 54.6  | 60.0  | 46.8  | 32.4   | 49.1  | 41.5   | 27.0   |
| #338     | 37.1 <sup>a</sup>  | 38.3  | 38.6   | 38.2  | 36.7  | 37.1  | 43.6  | 31.6  | 16.1   | 33.2  | 24.0   | 9.6    |
| #339     | 35.4 <sup>a</sup>  | 42.4  | 50.5   | 44.3  | 42.7  | 43.3  | 47.9  | 33.8  | 18.5   | 35.4  | 26.5   | 12.3   |
| #340     | 131.8 <sup>a</sup> | 106.3 | 118.0  | 120.8 | 103.3 | 105.4 | 136.8 | 119.1 | 117.7  | 133.3 | 122.8  | 108.9  |
| #341     | 53.4 <sup>a</sup>  | 60.1  | 60.7   | 61.1  | 60.2  | 58.8  | 60.8  | 55.8  | 41.8   | 56.9  | 49.1   | 35.4   |
| #342     | 22.1 <sup>a</sup>  | 22.0  | 20.1   | 22.3  | 21.5  | 22.7  | 31.0  | 20.2  | 4.1    | 21.4  | 10.7   | -3.6   |
| #343     | 30.5               | 30.5  | 32.3   | 29.3  | 27.2  | 26.1  | 34.6  | 6.5   | 5.3    | 22.4  | 13.2   | -0.7   |
| #344     | 32.4 <sup>a</sup>  | 37.7  | 34.7   | 37.0  | 36.0  | 34.4  | 30.3  | 16.3  | 15.1   | 30.6  | 21.4   | 7.5    |
| #346     | 19.5 <sup>a</sup>  | 31.5  | 25.2   | 17.1  | 14.9  | 14.3  | 37.3  | 11.2  | -6.3   | 15.5  | 2.6    | -11.1  |
| #347     | -8.9 <sup>a</sup>  | -18.5 | -21.5  | -15.2 | -15.4 | -12.9 | -4.2  | -12.0 | -30.8  | -12.5 | -25.8  | -39.9  |
| #348     | -34.9 <sup>a</sup> | -23.4 | -48.8  | -38.5 | -40.0 | -32.1 | -23.5 | -35.4 | -63.0  | -33.6 | -54.3  | -67.7  |
| #349     | -68.0 <sup>a</sup> | -22.6 | -57.8  | -59.9 | -65.2 | -59.2 | -33.8 | -64.8 | -93.4  | -58.6 | -82.3  | -94.2  |
| #350     | -40.2 <sup>a</sup> | 19.4  | -31.4  | -47.0 | -46.4 | -47.3 | -5.4  | -43.6 | -72.9  | -35.2 | -61.7  | -73.2  |
| #351     | -57.2 <sup>a</sup> | -53.9 | -86.5  | -71.1 | -64.5 | -65.3 | -58.9 | -50.8 | -74.8  | -55.0 | -77.0  | -89.1  |
| #352     | -64.8 <sup>a</sup> | -69.4 | -88.3  | -72.9 | -66.4 | -67.1 | -69.6 | -63.0 | -84.7  | -65.8 | -83.5  | -95.7  |
| #353     | -70.7 <sup>a</sup> | -67.5 | -90.8  | -74.4 | -68.4 | -69.2 | -69.8 | -65.3 | -88.2  | -67.9 | -86.6  | -98.8  |
| #354     | -63.5 <sup>a</sup> | 6.3   | -53.2  | -64.0 | -56.4 | -57.7 | -30.0 | -54.0 | -86.7  | -48.4 | -78.5  | -88.7  |
| #355     | -59.3 <sup>a</sup> | 46.9  | -33.3  | -54.4 | -54.8 | -54.3 | -8.9  | -58.8 | -93.6  | -46.4 | -79.0  | -88.6  |
| #356     | -79.4 <sup>a</sup> | -76.8 | -99.6  | -83.3 | -76.1 | -79.2 | -81.8 | -75.7 | -97.0  | -78.7 | -96.3  | -108.3 |
| #357     | 46.8 <sup>a</sup>  | 57.0  | 56.4   | 52.4  | 49.9  | 50.2  | 61.8  | 43.3  | 26.7   | 46.5  | 36.7   | 21.3   |
| #358     | -39.8 <sup>a</sup> | -17.9 | -49.8  | -42.8 | -45.8 | -38.0 | -22.7 | -42.3 | -68.3  | -38.4 | -62.5  | -76.7  |
| #359     | -37.6 <sup>a</sup> | -22.5 | -52.0  | -42.8 | -44.9 | -37.3 | -25.2 | -40.9 | -66.5  | -38.2 | -61.7  | -75.6  |
| #360     | -43.5 <sup>a</sup> | -22.8 | -52.5  | -44.9 | -48.1 | -39.6 | -25.4 | -44.0 | -69.6  | -40.7 | -63.9  | -78.0  |
| #361     | -24.9 <sup>a</sup> | 0.7   | -13.8  | -22.9 | -24.3 | -24.1 | -4.1  | -32.1 | -54.8  | -27.0 | -45.0  | -59.0  |
| #362     | -75.6 <sup>a</sup> | -72.2 | -97.6  | -79.8 | -73.4 | -74.3 | -75.0 | -69.9 | -94.4  | -72.8 | -92.9  | -105.8 |
| #363     | -84.8 <sup>a</sup> | -81.5 | -106.5 | -88.7 | -81.1 | -84.3 | -87.0 | -80.3 | -101.6 | -83.5 | -102.5 | -115.3 |
| #364     | 69.8 <sup>a</sup>  | 72.8  | 87.9   | 80.0  | 76.7  | 79.0  | 87.4  | 68.7  | 54.3   | 70.4  | 62.1   | 45.7   |
| #365     | 53.9 <sup>a</sup>  | 60.7  | 67.3   | 64.1  | 61.5  | 62.6  | 74.4  | 54.4  | 39.2   | 57.7  | 48.9   | 32.1   |
| #366     | 34.2 <sup>a</sup>  | 40.1  | 42.1   | 36.2  | 34.2  | 35.0  | 50.1  | 28.2  | 11.9   | 31.2  | 20.7   | 4.4    |
| #367     | 21.6 <sup>a</sup>  | 25.6  | 29.0   | 28.7  | 25.1  | 27.3  | 41.3  | 23.8  | 5.5    | 25.4  | 13.7   | -3.1   |
| #368     | 40.0 <sup>a</sup>  | 52.9  | 47.8   | 39.3  | 39.6  | 39.9  | 57.3  | 32.9  | 14.3   | 36.8  | 25.3   | 8.7    |
| #369     | 52.2 <sup>a</sup>  | 62.8  | 53.8   | 55.1  | 46.5  | 43.3  | 58.3  | 43.9  | 20.5   | 45.5  | 28.1   | 11.1   |
| #370     | 40.7 <sup>a</sup>  | 58.8  | 49.7   | 52.7  | 45.0  | 41.6  | 57.1  | 45.1  | 22.6   | 45.8  | 29.3   | 12.2   |
| #371     | 58.5 <sup>a</sup>  | 66.7  | 60.0   | 60.6  | 51.0  | 47.6  | 63.0  | 49.6  | 25.8   | 50.6  | 32.8   | 15.5   |

. . . continued on next page . . .

Table S24: . . . continued from previous page . . .

| Molecule | Ref.                | MNDO   | AMI    | PM3    | PM6    | PM7    | OM1    | OM2    |        |        | OM3    |        |        | D3T    |        |
|----------|---------------------|--------|--------|--------|--------|--------|--------|--------|--------|--------|--------|--------|--------|--------|--------|
|          |                     |        |        |        |        |        |        | D2     | D3     | D3T    | D2     | D3     | D3T    |        |        |
| #372     | 9.7 <sup>a</sup>    | 9.4    | 4.6    | 9.6    | 5.7    | 9.6    | 24.5   | 11.6   | -10.5  | -9.9   | -9.8   | 12.3   | -3.2   | -19.8  | -19.7  |
| #373     | -36.4 <sup>a</sup>  | -15.6  | -51.9  | -39.4  | -38.8  | -32.8  | -11.1  | -9.7   | -44.3  | -40.3  | -39.7  | -14.7  | -44.4  | -58.5  | -57.9  |
| #374     | -59.4 <sup>a</sup>  | -56.9  | -82.0  | -63.6  | -58.8  | -61.5  | -62.5  | -54.7  | -78.1  | -76.8  | -76.8  | -57.8  | -77.0  | -90.7  | -90.7  |
| #375     | -80.5 <sup>a</sup>  | -78.9  | -104.5 | -85.3  | -78.4  | -79.4  | -80.1  | -74.4  | -100.6 | -98.3  | -98.2  | -77.6  | -99.1  | -113.0 | -112.9 |
| #376     | -74.7 <sup>a</sup>  | -78.8  | -102.0 | -83.7  | -76.4  | -77.3  | -79.9  | -72.1  | -97.2  | -95.3  | -95.2  | -75.5  | -95.9  | -109.9 | -109.8 |
| #377     | -79.6 <sup>a</sup>  | -83.6  | -108.8 | -89.1  | -81.4  | -82.4  | -85.0  | -76.7  | -103.4 | -101.3 | -101.3 | -80.3  | -102.1 | -116.9 | -116.9 |
| #378     | -85.4 <sup>a</sup>  | -81.6  | -111.3 | -90.7  | -83.4  | -84.5  | -85.3  | -79.0  | -106.8 | -104.4 | -104.3 | -82.4  | -105.3 | -120.1 | -120.0 |
| #379     | -94.2 <sup>a</sup>  | -90.9  | -120.1 | -99.5  | -91.1  | -94.5  | -97.3  | -89.4  | -115.6 | -113.7 | -113.7 | -93.2  | -115.0 | -129.5 | -129.5 |
| #380     | 66.6 <sup>a</sup>   | 70.8   | 73.1   | 72.6   | 69.9   | 68.0   | 71.8   | 59.2   | 42.1   | 40.1   | 40.1   | 61.8   | 51.2   | 32.9   | 32.8   |
| #381     | 68.0 <sup>a</sup>   | 72.7   | 71.5   | 70.8   | 64.2   | 58.6   | 74.3   | 62.7   | 42.1   | 40.3   | 40.4   | 65.7   | 51.1   | 33.0   | 33.1   |
| #382     | 38.3 <sup>a</sup>   | 49.1   | 42.8   | 35.4   | 30.6   | 28.3   | 57.1   | 22.9   | 0.2    | -0.5   | -0.4   | 28.8   | 12.4   | -6.0   | -5.9   |
| #383     | 30.9 <sup>a</sup>   | 37.1   | 26.7   | 29.8   | 23.6   | 18.8   | 34.7   | 24.0   | -4.3   | -4.4   | -3.9   | 24.0   | 1.7    | -16.9  | -16.5  |
| #384     | 13.7 <sup>a</sup>   | 70.4   | 35.3   | 27.9   | 22.8   | 18.3   | 39.3   | 9.4    | -18.6  | -18.0  | -17.7  | 17.3   | -5.3   | -22.7  | -22.4  |
| #385     | -90.4 <sup>a</sup>  | -86.3  | -118.2 | -96.1  | -88.4  | -89.6  | -90.4  | -83.6  | -113.0 | -110.4 | -110.4 | -87.3  | -111.5 | -127.1 | -127.1 |
| #386     | -84.6 <sup>a</sup>  | -88.3  | -115.7 | -94.6  | -86.4  | -87.5  | -90.2  | -81.3  | -109.6 | -107.4 | -107.4 | -85.1  | -108.3 | -124.0 | -124.0 |
| #387     | -59.9 <sup>a</sup>  | 70.5   | -27.4  | -61.1  | -59.7  | -55.5  | 7.5    | -50.3  | -96.0  | -90.8  | -89.9  | -40.0  | -83.6  | -97.5  | -96.5  |
| #388     | -99.1 <sup>a</sup>  | -95.6  | -127.0 | -105.0 | -96.1  | -99.6  | -102.4 | -93.9  | -121.8 | -119.8 | -119.8 | -98.0  | -121.2 | -136.6 | -136.6 |
| #392     | 61.9 <sup>a</sup>   | 68.0   | 64.8   | 67.3   | 59.9   | 53.6   | 69.4   | 58.7   | 37.1   | 35.4   | 35.6   | 61.3   | 45.8   | 27.1   | 27.3   |
| #393     | -89.5 <sup>a</sup>  | -93.0  | -122.5 | -100.0 | -91.4  | -92.6  | -95.3  | -85.8  | -115.8 | -113.5 | -113.5 | -90.0  | -114.6 | -131.1 | -131.1 |
| #394     | -95.3 <sup>a</sup>  | -91.0  | -125.0 | -101.5 | -93.4  | -94.7  | -95.6  | -88.1  | -119.2 | -116.5 | -116.5 | -92.1  | -117.7 | -134.2 | -134.2 |
| #395     | -104.0 <sup>a</sup> | -100.3 | -133.8 | -110.4 | -101.1 | -104.7 | -107.6 | -98.5  | -128.0 | -125.9 | -125.9 | -102.9 | -127.4 | -143.7 | -143.7 |
| #396     | 76.9 <sup>a</sup>   | 87.3   | 91.9   | 85.1   | 80.1   | 79.6   | 90.3   | 65.3   | 43.8   | 42.2   | 42.3   | 68.6   | 55.5   | 33.9   | 34.1   |
| #397     | 45.1 <sup>a</sup>   | 59.4   | 62.8   | 55.6   | 52.1   | 53.7   | 75.8   | 46.7   | 26.1   | 24.4   | 24.3   | 50.9   | 37.7   | 17.0   | 17.0   |
| #398     | 62.7 <sup>a</sup>   | 76.5   | 71.4   | 62.1   | 60.3   | 60.3   | 84.4   | 52.2   | 29.6   | 28.2   | 28.3   | 57.8   | 42.9   | 21.8   | 21.8   |
| #399     | 66.3 <sup>a</sup>   | 79.9   | 75.2   | 67.0   | 63.7   | 63.7   | 89.7   | 57.8   | 35.2   | 33.8   | 33.8   | 63.4   | 48.4   | 27.4   | 27.4   |
| #400     | 3.4 <sup>a</sup>    | 54.9   | 44.3   | 20.4   | 10.0   | 12.1   | 57.8   | 9.2    | -22.6  | -21.3  | -21.0  | 18.1   | -8.4   | -26.2  | -26.0  |
| #401     | 111.5 <sup>a</sup>  | 182.2  | 168.7  | 142.2  | 100.6  | 114.9  | 137.2  | 121.5  | 80.3   | 85.9   | 86.6   | 128.3  | 92.6   | 77.9   | 78.6   |
| #402     | 6.2 <sup>a</sup>    | 81.1   | 79.6   | 40.6   | 16.2   | 25.2   | 89.5   | 45.7   | 5.9    | 8.6    | 9.3    | 47.2   | 10.3   | -4.8   | -4.1   |
| #403     | -71.6 <sup>a</sup>  | -35.7  | -94.8  | -86.0  | -80.5  | -81.5  | -56.6  | -70.4  | -114.0 | -109.4 | -108.8 | -69.2  | -107.9 | -124.7 | -124.1 |
| #404     | -100.2 <sup>a</sup> | -95.7  | -131.9 | -106.9 | -98.4  | -99.8  | -100.7 | -92.7  | -125.4 | -122.6 | -122.5 | -96.9  | -124.0 | -141.3 | -141.2 |
| #405     | -108.9 <sup>a</sup> | -105.1 | -140.7 | -115.8 | -106.1 | -109.8 | -112.7 | -103.1 | -134.2 | -132.0 | -132.0 | -107.7 | -133.6 | -150.7 | -150.7 |
| #406     | 6.9 <sup>a</sup>    | 23.3   | 4.7    | 11.9   | 9.2    | 3.9    | 20.6   | 11.0   | -20.6  | -21.0  | -20.5  | 11.0   | -13.7  | -34.9  | -34.4  |
| #407     | -99.3 <sup>a</sup>  | -100.8 | -134.5 | -111.0 | -100.5 | -101.6 | -103.3 | -93.5  | -127.4 | -124.7 | -124.7 | -98.1  | -126.1 | -144.3 | -144.3 |
| #408     | -105.1 <sup>a</sup> | -99.5  | -137.7 | -111.8 | -102.7 | -104.2 | -104.7 | -96.1  | -130.9 | -127.8 | -127.8 | -100.6 | -129.4 | -147.5 | -147.4 |
| #410     | 26.6 <sup>a</sup>   | 65.1   | 31.2   | 28.7   | 26.6   | 23.0   | 40.5   | 20.3   | -16.6  | -15.4  | -14.8  | 26.3   | -3.0   | -25.0  | -24.5  |
| #411     | -50.4 <sup>a</sup>  | 18.1   | -43.7  | -47.8  | -52.8  | -54.4  | -7.8   | -42.0  | -89.3  | -85.6  | -84.8  | -34.5  | -76.1  | -96.4  | -95.6  |
| #412     | -58.4 <sup>a</sup>  | 19.1   | -43.1  | -46.8  | -51.9  | -53.9  | -6.5   | -41.0  | -88.5  | -84.7  | -83.8  | -33.6  | -75.5  | -94.7  | -94.7  |
| #413     | -110.1 <sup>a</sup> | -105.1 | -145.5 | -117.8 | -108.4 | -110.1 | -111.0 | -101.8 | -137.8 | -134.7 | -134.7 | -106.6 | -136.4 | -155.4 | -155.4 |
| #414     | 91.4 <sup>a</sup>   | 95.5   | 98.6   | 97.2   | 92.7   | 90.3   | 99.1   | 79.4   | 55.9   | 53.2   | 53.2   | 83.4   | 68.6   | 43.9   | 43.9   |
| #415     | 10.4 <sup>a</sup>   | 64.0   | 13.1   | 17.6   | 13.3   | 8.1    | 31.7   | 7.7    | -35.5  | -33.2  | -32.5  | 14.5   | -20.4  | -44.3  | -43.6  |
| #416     | -18.5 <sup>a</sup>  | 2.8    | -21.6  | -10.5  | -10.4  | -15.6  | 1.6    | -5.2   | -41.1  | -41.2  | -40.7  | -6.2   | -34.8  | -58.4  | -57.9  |
| #418     | 93.9 <sup>a</sup>   | 135.4  | 117.7  | 114.9  | 105.0  | 96.8   | 107.9  | 82.9   | 53.2   | 49.1   | 49.4   | 90.6   | 69.2   | 41.4   | 42.5   |
| #419     | 95.4 <sup>a</sup>   | 109.3  | 122.7  | 110.2  | 103.2  | 101.4  | 117.2  | 89.3   | 59.0   | 56.3   | 56.7   | 92.9   | 72.4   | 44.9   | 45.3   |
| #420     | 87.3 <sup>a</sup>   | 131.8  | 110.7  | 108.1  | 98.8   | 89.8   | 104.5  | 80.6   | 46.7   | 44.1   | 44.6   | 87.4   | 62.6   | 34.6   | 35.0   |
| #421     | 85.4 <sup>a</sup>   | 113.7  | 101.8  | 100.8  | 94.4   | 85.9   | 96.9   | 80.7   | 48.1   | 45.3   | 45.7   | 84.5   | 61.2   | 33.5   | 33.9   |

. . . continued on next page . . .

Table S24: . . . continued from previous page . . .

| Molecule | Ref.                | MNDO   | AMI    | PM3    | PM6    | PM7    | OM1    | OM2    |        | OM3    |        | D3T    |        |        |        |
|----------|---------------------|--------|--------|--------|--------|--------|--------|--------|--------|--------|--------|--------|--------|--------|--------|
|          |                     |        |        |        |        |        |        | D2     | D3     | D2     | D3     |        |        |        |        |
| #422     | 78.0 <sup>a</sup>   | 106.6  | 90.5   | 89.9   | 72.2   | 63.9   | 105.0  | 74.6   | 29.8   | 29.8   | 78.0   | 30.7   | 14.1   | 15.0   |        |
| #423     | -33.3 <sup>a</sup>  | 57.9   | -1.7   | -18.4  | -25.2  | -30.8  | 16.9   | -43.5  | -89.2  | -86.9  | -29.2  | -86.4  | -67.6  | -92.0  | -91.6  |
| #424     | -141.8 <sup>a</sup> | -124.0 | -176.5 | -147.5 | -134.9 | -139.8 | -137.8 | -129.1 | -172.1 | -168.9 | -134.4 | -168.8 | -170.7 | -192.9 | -192.8 |
| #425     | -140.4 <sup>a</sup> | -124.0 | -176.5 | -147.5 | -134.9 | -139.7 | -137.8 | -129.1 | -172.1 | -168.8 | -134.3 | -168.8 | -170.7 | -192.8 | -192.8 |
| #426     | 94.3 <sup>a</sup>   | 130.2  | 128.7  | 110.3  | 97.2   | 93.9   | 120.3  | 75.6   | 37.5   | 36.0   | 84.8   | 36.4   | 56.8   | 27.5   | 27.9   |
| #427     | 16.6 <sup>a</sup>   | 90.0   | 15.3   | 23.5   | 15.2   | 10.6   | 47.9   | 27.4   | -28.0  | -24.8  | 30.4   | -23.8  | -16.6  | -43.7  | -42.6  |
| #428     | -167.3 <sup>a</sup> | -148.3 | -211.5 | -175.4 | -160.5 | -166.1 | -163.9 | -153.2 | -204.2 | -200.3 | -159.6 | -200.3 | -202.6 | -229.1 | -229.0 |
| #429     | -60.6 <sup>a</sup>  | 61.1   | -26.4  | -42.8  | -48.7  | -59.7  | 3.9    | -63.5  | -125.6 | -122.4 | -47.6  | -121.4 | -101.6 | -131.6 | -130.7 |
| #430     | -166.5 <sup>a</sup> | -161.6 | -222.9 | -180.9 | -166.1 | -171.0 | -174.4 | -157.8 | -208.7 | -204.9 | -165.7 | -204.9 | -208.2 | -235.7 | -235.7 |
| #431     | -50.8 <sup>a</sup>  | 56.9   | -36.6  | -47.8  | -52.7  | -66.1  | -4.3   | -65.5  | -132.2 | -129.0 | -50.8  | -127.9 | -108.2 | -140.9 | -139.9 |
| #432     | -58.6 <sup>a</sup>  | 45.5   | -56.3  | -67.9  | -69.2  | -83.0  | -17.1  | -77.5  | -150.8 | -147.9 | -63.8  | -147.6 | -127.8 | -164.4 | -163.1 |
| #433     | -58.6 <sup>a</sup>  | 38.6   | -50.7  | -61.0  | -64.3  | -79.8  | -10.5  | -70.2  | -147.4 | -143.9 | -70.0  | -142.5 | -124.0 | -160.6 | -159.3 |
| #447     | 32.3 <sup>a</sup>   | 35.3   | 31.0   | 33.0   | 33.2   | 29.8   | 24.5   | 26.1   | 25.9   | 25.7   | 25.3   | 25.7   | 25.2   | 24.7   | 24.7   |
| #454     | -5.5 <sup>a</sup>   | -7.5   | -7.4   | -5.2   | -2.4   | -3.4   | -4.7   | -4.1   | -5.3   | -5.6   | -5.8   | -5.6   | -6.6   | -8.1   | -8.1   |
| #459     | 17.7 <sup>a</sup>   | 19.2   | 19.3   | 23.3   | 20.5   | 18.2   | 16.5   | 17.5   | 16.5   | 16.2   | 15.3   | 16.2   | 14.8   | 13.2   | 13.2   |
| #460     | 39.1 <sup>a</sup>   | 60.3   | 50.4   | 54.7   | 45.5   | 38.9   | 27.8   | 38.3   | 37.3   | 36.9   | 26.7   | 36.9   | 26.1   | 24.4   | 24.4   |
| #462     | 30.2 <sup>a</sup>   | 25.1   | 33.1   | 31.6   | 29.6   | 32.3   | 30.6   | 36.3   | 34.5   | 34.3   | 35.4   | 34.3   | 34.3   | 32.2   | 32.3   |
| #467     | -4.4 <sup>a</sup>   | -6.6   | -5.6   | -7.9   | -3.1   | -4.2   | -4.7   | -5.1   | -7.7   | -7.9   | -2.2   | -7.9   | -4.3   | -6.5   | -6.5   |
| #472     | 44.1 <sup>a</sup>   | 43.8   | 45.0   | 50.2   | 46.0   | 43.8   | 43.3   | 45.6   | 44.2   | 43.6   | 43.7   | 43.6   | 42.9   | 40.5   | 40.5   |
| #476     | -5.7 <sup>a</sup>   | -2.8   | -1.7   | -10.9  | -4.4   | -6.2   | -3.5   | -8.0   | -12.4  | -12.4  | -0.1   | -12.4  | -3.8   | -6.7   | -6.7   |
| #484     | 25.9 <sup>a</sup>   | 32.5   | 39.9   | 27.1   | 25.8   | 26.5   | 37.2   | 33.7   | 31.0   | 30.2   | 32.0   | 30.2   | 30.5   | 26.3   | 26.3   |
| #493     | 34.6 <sup>a</sup>   | 28.8   | 32.0   | 30.4   | 33.9   | 31.7   | 33.0   | 30.8   | 27.1   | 26.3   | 29.4   | 26.3   | 27.6   | 22.2   | 22.3   |
| #689     | 54.0 <sup>a</sup>   | 40.0   | 58.0   | 46.2   | 59.1   | 49.5   | 59.4   | 59.7   | 57.3   | 56.1   | 55.6   | 56.1   | 54.3   | 49.8   | 49.8   |
| #449     | 43.5 <sup>a</sup>   | 67.9   | 48.8   | 56.6   | 46.6   | 38.7   | 33.8   | 42.9   | 42.7   | 42.5   | 26.8   | 42.5   | 26.8   | 26.1   | 26.1   |
| #470     | 178.0 <sup>a</sup>  | 186.8  | 176.3  | 185.3  | 183.0  | 181.1  | 173.9  | 174.9  | 174.0  | 173.7  | 173.4  | 173.7  | 172.9  | 171.6  | 171.6  |
| #451     | 0.0 <sup>a</sup>    | 19.3   | 15.7   | 20.8   | 17.2   | 16.8   | 30.1   | 29.3   | 28.5   | 28.2   | 25.2   | 28.2   | 24.7   | 23.3   | 23.3   |
| #452     | 37.0 <sup>a</sup>   | 32.7   | 34.1   | 27.3   | 37.5   | 35.2   | 39.2   | 41.9   | 41.0   | 40.8   | 39.0   | 40.8   | 38.4   | 37.1   | 37.1   |
| #453     | 30.5 <sup>a</sup>   | 23.5   | 33.1   | 21.7   | 37.4   | 30.9   | 38.4   | 31.9   | 31.1   | 30.8   | 25.6   | 30.8   | 25.0   | 23.8   | 23.8   |
| #464     | 24.7 <sup>a</sup>   | 8.5    | 22.4   | 7.8    | 30.9   | 24.2   | 27.6   | 17.4   | 15.3   | 15.1   | 17.1   | 15.1   | 15.4   | 13.4   | 13.4   |
| #466     | -11.4 <sup>a</sup>  | -13.2  | -15.1  | -12.5  | -11.2  | -11.3  | -9.3   | -8.9   | -11.5  | -11.7  | -12.1  | -11.7  | -14.1  | -16.5  | -16.5  |
| #473     | 12.1 <sup>a</sup>   | 13.8   | 13.0   | 18.5   | 16.0   | 13.6   | 10.8   | 12.3   | 9.9    | 9.6    | 10.2   | 9.6    | 8.6    | 6.0    | 6.0    |
| #474     | 18.4 <sup>a</sup>   | 15.4   | 18.6   | 18.7   | 14.4   | 18.1   | 19.9   | 22.1   | 18.7   | 18.6   | 19.5   | 18.6   | 17.1   | 14.1   | 14.1   |
| #475     | -20.0 <sup>a</sup>  | -16.3  | -19.3  | -18.7  | -18.3  | -17.6  | -13.1  | -15.0  | -19.6  | -19.5  | -18.3  | -19.5  | -21.9  | -25.1  | -25.1  |
| #477     | -16.8 <sup>a</sup>  | -18.2  | -22.1  | -17.9  | -15.7  | -16.2  | -14.6  | -13.5  | -17.8  | -17.8  | -16.9  | -17.8  | -20.3  | -23.5  | -23.5  |
| #481     | 33.6 <sup>a</sup>   | 33.9   | 34.6   | 39.5   | 34.9   | 32.8   | 34.5   | 35.7   | 33.0   | 32.5   | 33.6   | 32.5   | 31.8   | 28.5   | 28.5   |
| #482     | 32.0 <sup>a</sup>   | 34.1   | 35.1   | 40.2   | 35.1   | 33.0   | 35.4   | 36.4   | 33.5   | 33.0   | 34.2   | 33.0   | 32.3   | 28.8   | 28.8   |
| #483     | 37.7 <sup>a</sup>   | 38.7   | 38.0   | 43.9   | 39.4   | 37.6   | 36.3   | 39.0   | 36.1   | 35.6   | 37.0   | 35.6   | 35.1   | 31.8   | 31.8   |
| #486     | 7.4 <sup>a</sup>    | 8.9    | 6.1    | 13.1   | 10.8   | 8.4    | 5.3    | 7.5    | 3.4    | 3.3    | 5.3    | 3.3    | 2.3    | -1.1   | -1.1   |
| #487     | 5.6 <sup>a</sup>    | 11.3   | 8.5    | 13.4   | 10.0   | 8.0    | 6.9    | 5.1    | 0.9    | 0.7    | 3.5    | 0.8    | 0.4    | -3.1   | -3.1   |
| #488     | -0.8 <sup>a</sup>   | -15.8  | -10.4  | -12.0  | -7.9   | -5.6   | -5.1   | 0.0    | -5.3   | -5.3   | 0.4    | -5.3   | -3.5   | -7.9   | -7.8   |
| #489     | -25.4 <sup>a</sup>  | -20.3  | -25.6  | -23.2  | -22.2  | -21.8  | -18.0  | -19.4  | -25.7  | -25.5  | -22.7  | -25.5  | -28.0  | -32.0  | -32.0  |
| #490     | -23.6 <sup>a</sup>  | -19.2  | -24.9  | -21.5  | -19.0  | -19.3  | -18.5  | -19.5  | -25.9  | -25.7  | -21.7  | -25.7  | -27.1  | -31.0  | -31.0  |
| #491     | -22.7 <sup>a</sup>  | -23.0  | -27.2  | -21.9  | -18.4  | -19.1  | -20.8  | -18.0  | -23.8  | -23.7  | -20.9  | -23.7  | -25.6  | -29.7  | -29.7  |
| #492     | -28.9 <sup>a</sup>  | -15.5  | -21.3  | -25.2  | -26.1  | -24.2  | -14.7  | -22.3  | -29.1  | -28.7  | -24.6  | -28.7  | -30.4  | -34.3  | -34.3  |
| #495     | 24.6 <sup>a</sup>   | 32.3   | 44.4   | 25.9   | 25.0   | 25.7   | 35.5   | 31.1   | 26.8   | 26.0   | 33.5   | 26.0   | 30.6   | 25.6   | 25.6   |

. . . continued on next page . . .

Table S24: . . . continued from previous page . . .

| Molecule | Ref.               | MNDO  | AMI   | PM3   | PM6   | PM7   | OM1   | OM2   |       | OM3   |       | D3T   |       |
|----------|--------------------|-------|-------|-------|-------|-------|-------|-------|-------|-------|-------|-------|-------|
|          |                    |       |       |       |       |       |       | D2    | D3    | D2    | D3    |       |       |
| #496     | 7.1 <sup>a</sup>   | 6.2   | 6.9   | 7.0   | 7.9   | 10.8  | 17.7  | 20.8  | 14.6  | 14.4  | 20.6  | 16.2  | 10.8  |
| #497     | 0.6 <sup>a</sup>   | 7.8   | 2.4   | 8.6   | 5.6   | 3.4   | 2.1   | 0.6   | -5.5  | -5.4  | -0.8  | -5.6  | -9.9  |
| #498     | 2.7 <sup>a</sup>   | 4.2   | -0.7  | 7.7   | 5.8   | 3.5   | 0.1   | 2.9   | -2.7  | -2.8  | 0.5   | -3.8  | -8.1  |
| #499     | -0.8 <sup>a</sup>  | 12.5  | 5.6   | 7.8   | 2.8   | 1.5   | 5.1   | -3.7  | -10.2 | -10.0 | -3.9  | -9.0  | -13.4 |
| #500     | -13.1 <sup>a</sup> | -22.5 | -22.7 | -17.8 | -14.9 | -12.8 | -15.0 | -9.9  | -17.3 | -17.0 | -13.8 | -19.3 | -24.6 |
| #501     | -11.3 <sup>a</sup> | -18.5 | -21.8 | -18.8 | -16.1 | -13.8 | -9.8  | -6.7  | -14.6 | -14.1 | -7.2  | -13.3 | -18.5 |
| #502     | -25.9 <sup>a</sup> | -21.7 | -25.4 | -24.5 | -19.0 | -20.1 | -20.9 | -19.2 | -26.6 | -26.4 | -17.7 | -23.7 | -28.6 |
| #503     | 37.4 <sup>a</sup>  | 28.6  | 32.8  | 37.3  | 34.6  | 34.4  | 36.1  | 37.3  | 31.7  | 31.3  | 34.7  | 31.1  | 25.6  |
| #504     | 33.9 <sup>a</sup>  | 35.0  | 36.0  | 40.4  | 37.2  | 37.3  | 35.7  | 37.4  | 31.7  | 31.2  | 35.0  | 31.3  | 25.6  |
| #505     | 23.6 <sup>a</sup>  | 19.7  | 25.7  | 21.2  | 23.2  | 21.7  | 27.2  | 22.8  | 17.7  | 16.8  | 20.9  | 17.9  | 11.5  |
| #506     | 24.8 <sup>a</sup>  | 20.5  | 24.1  | 20.9  | 24.4  | 22.1  | 27.7  | 21.2  | 16.0  | 15.2  | 20.3  | 17.1  | 10.8  |
| #507     | 24.8 <sup>a</sup>  | 20.9  | 24.2  | 20.8  | 23.0  | 21.3  | 27.7  | 21.2  | 16.0  | 15.1  | 20.4  | 17.2  | 10.9  |
| #508     | 20.8 <sup>a</sup>  | 21.7  | 20.5  | 21.3  | 21.4  | 21.2  | 25.6  | 25.2  | 19.9  | 19.0  | 22.3  | 19.2  | 12.7  |
| #509     | 9.5 <sup>a</sup>   | 10.2  | 23.4  | 6.9   | 5.5   | 7.5   | 25.5  | 18.3  | 12.6  | 11.8  | 14.8  | 11.0  | 4.7   |
| #510     | 11.7 <sup>a</sup>  | 5.5   | 3.6   | 13.1  | 10.6  | 10.7  | 6.5   | 9.8   | 2.6   | 3.3   | 8.0   | 2.9   | -2.7  |
| #511     | -20.2 <sup>a</sup> | -21.5 | -23.1 | -22.6 | -18.4 | -16.1 | -16.2 | -13.3 | -23.1 | -22.5 | -13.3 | -21.0 | -27.1 |
| #512     | -10.8 <sup>a</sup> | -17.6 | -25.8 | -19.6 | -18.1 | -15.3 | -10.2 | -5.0  | -15.5 | -14.6 | -7.0  | -15.5 | -21.3 |
| #513     | -25.1 <sup>a</sup> | -25.7 | -31.9 | -24.6 | -22.3 | -20.4 | -20.8 | -17.3 | -27.4 | -26.6 | -21.2 | -29.1 | -35.1 |
| #514     | -27.8 <sup>a</sup> | -27.2 | -31.6 | -30.2 | -25.0 | -26.1 | -26.8 | -24.3 | -33.1 | -32.9 | -23.6 | -30.9 | -36.6 |
| #515     | -32.6 <sup>a</sup> | -20.4 | -26.1 | -33.1 | -32.4 | -30.7 | -20.7 | -25.1 | -35.1 | -34.7 | -25.6 | -34.1 | -39.8 |
| #516     | -22.1 <sup>a</sup> | -14.7 | -18.3 | -28.6 | -23.0 | -22.3 | -16.7 | -17.3 | -27.6 | -27.3 | -14.9 | -24.1 | -29.4 |
| #518     | 51.5 <sup>a</sup>  | 52.0  | 53.4  | 58.5  | 55.3  | 53.5  | 51.1  | 49.7  | 44.7  | 43.7  | 48.0  | 45.3  | 38.6  |
| #519     | 24.3 <sup>a</sup>  | 21.1  | 20.4  | 29.4  | 25.1  | 25.1  | 28.4  | 29.5  | 21.5  | 21.4  | 26.8  | 21.3  | 14.6  |
| #520     | 13.4 <sup>a</sup>  | 10.7  | 19.5  | 12.0  | 12.3  | 11.7  | 21.5  | 14.5  | 7.8   | 6.9   | 12.5  | 8.1   | 0.8   |
| #521     | 26.2 <sup>a</sup>  | 26.6  | 24.0  | 33.1  | 28.2  | 28.5  | 29.0  | 31.1  | 22.8  | 22.8  | 28.6  | 22.8  | 16.1  |
| #522     | 21.0 <sup>a</sup>  | 19.5  | 17.1  | 19.9  | 20.9  | 21.1  | 22.7  | 21.7  | 14.5  | 13.8  | 18.7  | 14.1  | 6.6   |
| #523     | 14.6 <sup>a</sup>  | 14.2  | 13.0  | 12.0  | 10.7  | 11.2  | 20.7  | 15.8  | 8.8   | 8.0   | 13.3  | 8.8   | 1.3   |
| #524     | 20.1 <sup>a</sup>  | 24.3  | 24.2  | 20.7  | 22.4  | 22.0  | 26.3  | 25.5  | 18.5  | 17.7  | 26.5  | 21.9  | 14.6  |
| #525     | 12.7 <sup>a</sup>  | 16.2  | 13.2  | 13.2  | 13.5  | 13.1  | 21.6  | 16.6  | 9.3   | 8.6   | 14.3  | 9.5   | 2.1   |
| #526     | 10.0 <sup>a</sup>  | 13.8  | 12.9  | 12.0  | 12.5  | 12.3  | 20.9  | 16.3  | 9.4   | 8.6   | 13.8  | 9.3   | 1.9   |
| #527     | -0.9 <sup>a</sup>  | 1.8   | -5.9  | 6.0   | 3.0   | 3.0   | -0.1  | 2.5   | -7.4  | -6.7  | 0.1   | -7.4  | -13.8 |
| #528     | -0.9 <sup>a</sup>  | 1.8   | -5.9  | 6.0   | 3.0   | 3.0   | -0.1  | 2.5   | -7.4  | -6.7  | 0.1   | -7.4  | -13.8 |
| #529     | -0.9 <sup>a</sup>  | -20.0 | -10.5 | -19.7 | -14.0 | -8.7  | -4.9  | -2.6  | -13.5 | -13.0 | 1.5   | -6.7  | -13.8 |
| #530     | -7.4 <sup>a</sup>  | -5.2  | -14.4 | -3.1  | -4.1  | -6.7  | -10.2 | -6.2  | -15.2 | -14.9 | -9.1  | -16.2 | -22.3 |
| #531     | -39.4 <sup>a</sup> | -28.9 | -36.0 | -36.9 | -33.9 | -33.8 | -28.5 | -29.5 | -40.6 | -40.1 | -29.6 | -38.8 | -45.3 |
| #532     | 18.0 <sup>a</sup>  | 24.4  | 18.6  | 22.8  | 19.1  | 20.6  | 21.5  | 15.6  | 4.2   | 5.0   | 15.5  | 7.2   | -0.3  |
| #533     | 39.6 <sup>a</sup>  | 63.2  | 48.4  | 50.8  | 37.8  | 36.2  | 30.9  | 36.1  | 24.8  | 25.4  | 24.8  | 16.4  | 8.8   |
| #534     | 8.3 <sup>a</sup>   | 6.5   | 11.9  | 7.5   | 9.7   | 7.5   | 18.3  | 8.5   | -0.1  | -0.8  | 7.3   | 1.3   | -6.9  |
| #535     | 24.0 <sup>a</sup>  | 28.9  | 31.1  | 20.0  | 24.0  | 23.2  | 29.2  | 24.9  | 15.8  | 15.2  | 30.5  | 23.9  | 15.7  |
| #536     | 13.4 <sup>a</sup>  | 19.3  | 17.7  | 13.9  | 14.1  | 14.3  | 21.9  | 20.7  | 11.8  | 11.1  | 20.4  | 14.3  | 6.0   |
| #537     | -10.4 <sup>a</sup> | -13.7 | -26.4 | -18.2 | -17.8 | -12.5 | -5.2  | -2.3  | -17.4 | -15.6 | -3.7  | -15.6 | -23.4 |
| #538     | -12.1 <sup>a</sup> | -9.9  | -21.2 | -8.5  | -9.1  | -11.8 | -15.3 | -10.8 | -21.4 | -21.0 | -14.0 | -22.5 | -29.4 |
| #539     | -21.8 <sup>a</sup> | -17.4 | -22.3 | -21.8 | -17.1 | -21.1 | -18.0 | -16.7 | -29.9 | -29.8 | -18.3 | -27.5 | -35.1 |
| #540     | -43.2 <sup>a</sup> | -28.3 | -41.0 | -40.5 | -36.5 | -37.1 | -32.3 | -36.5 | -49.9 | -49.2 | -34.8 | -46.3 | -53.5 |
| #541     | -43.9 <sup>a</sup> | -26.5 | -37.6 | -42.4 | -41.1 | -40.3 | -29.6 | -34.0 | -47.9 | -47.2 | -34.4 | -46.3 | -53.5 |

. . . continued on next page . . .

Table S24: . . . continued from previous page . . .

| Molecule | Ref.               | MNDO  | AMI    | PM3   | PM6   | PM7   | OM1   |       | OM2   |       | OM3   |       | OM3    |        | D3T |
|----------|--------------------|-------|--------|-------|-------|-------|-------|-------|-------|-------|-------|-------|--------|--------|-----|
|          |                    |       |        |       |       |       | D2    | D3    | D2    | D3    | D2    | D3    | D2     | D3     |     |
| #542     | -40.9 <sup>a</sup> | -36.6 | -45.2  | -41.0 | -34.9 | -36.1 | -37.0 | -33.4 | -45.5 | -45.0 | -33.2 | -43.2 | -50.7  | -50.7  |     |
| #543     | -41.8 <sup>a</sup> | -32.7 | -43.0  | -40.6 | -35.5 | -36.4 | -34.8 | -34.9 | -47.6 | -47.0 | -34.1 | -44.8 | -52.2  | -52.2  |     |
| #544     | -41.5 <sup>a</sup> | -41.9 | -54.6  | -43.6 | -38.4 | -39.5 | -41.4 | -36.2 | -48.7 | -48.0 | -40.2 | -50.5 | -58.0  | -58.0  |     |
| #545     | 48.9 <sup>a</sup>  | 45.3  | 50.2   | 47.2  | 50.1  | 48.6  | 55.5  | 46.9  | 39.1  | 37.9  | 46.7  | 42.3  | 32.7   | 32.7   |     |
| #546     | 47.9 <sup>a</sup>  | 44.7  | 52.2   | 47.5  | 50.7  | 49.7  | 55.7  | 48.7  | 41.0  | 39.7  | 48.0  | 43.8  | 34.1   | 34.1   |     |
| #547     | 34.9 <sup>a</sup>  | 40.0  | 39.8   | 41.8  | 34.5  | 33.1  | 41.2  | 30.1  | 21.1  | 20.3  | 29.8  | 23.9  | 15.0   | 15.0   |     |
| #548     | 36.2 <sup>a</sup>  | 39.8  | 30.5   | 39.4  | 32.8  | 34.3  | 35.2  | 32.6  | 20.1  | 20.7  | 31.1  | 22.6  | 13.2   | 13.3   |     |
| #549     | 36.6 <sup>a</sup>  | 40.2  | 30.6   | 39.6  | 32.6  | 34.1  | 35.3  | 32.4  | 19.8  | 20.4  | 31.2  | 22.5  | 13.2   | 13.3   |     |
| #550     | 19.6 <sup>a</sup>  | 14.2  | 15.3   | 13.7  | 14.7  | 16.8  | 23.5  | 22.4  | 11.9  | 11.4  | 22.5  | 15.6  | 5.9    | 5.9    |     |
| #551     | 17.0 <sup>a</sup>  | 7.1   | 11.2   | 10.8  | 13.1  | 12.8  | 20.9  | 15.7  | 5.0   | 4.7   | 13.6  | 6.5   | -3.1   | -3.0   |     |
| #552     | 17.4 <sup>a</sup>  | 21.3  | 23.6   | 10.7  | 13.5  | 13.3  | 24.5  | 15.6  | 4.8   | 4.2   | 21.6  | 13.5  | 4.4    | 4.4    |     |
| #553     | 16.5 <sup>a</sup>  | 21.1  | 23.5   | 10.7  | 15.1  | 14.3  | 24.5  | 16.0  | 5.3   | 4.7   | 22.1  | 14.1  | 5.0    | 5.0    |     |
| #554     | 7.3 <sup>a</sup>   | 11.8  | 10.2   | 4.6   | 3.6   | 4.2   | 16.9  | 11.4  | 0.8   | 0.1   | 11.4  | 3.9   | -5.4   | -5.4   |     |
| #555     | -15.9 <sup>a</sup> | -25.8 | -17.8  | -31.6 | -26.8 | -20.9 | -13.3 | -16.3 | -31.2 | -30.5 | -12.8 | -24.8 | -33.6  | -33.5  |     |
| #556     | -27.0 <sup>a</sup> | -26.7 | -38.9  | -32.6 | -31.5 | -27.4 | -19.0 | -18.1 | -34.3 | -32.8 | -18.9 | -31.7 | -40.6  | -40.5  |     |
| #557     | -38.2 <sup>a</sup> | -13.9 | -29.5  | -40.4 | -42.1 | -36.4 | -15.5 | -30.1 | -47.9 | -46.2 | -30.7 | -44.2 | -52.4  | -52.3  |     |
| #558     | 38.0 <sup>a</sup>  | 35.8  | 46.0   | 38.4  | 39.8  | 39.7  | 49.9  | 40.5  | 31.3  | 30.0  | 39.4  | 33.9  | 23.2   | 23.2   |     |
| #559     | 38.7 <sup>a</sup>  | 39.1  | 45.2   | 39.0  | 40.7  | 39.8  | 51.2  | 39.5  | 29.8  | 28.7  | 39.7  | 33.7  | 23.1   | 23.1   |     |
| #560     | 38.5 <sup>a</sup>  | 37.1  | 44.4   | 38.1  | 40.6  | 40.0  | 50.6  | 39.1  | 29.8  | 28.5  | 38.8  | 33.2  | 22.6   | 22.6   |     |
| #561     | 40.1 <sup>a</sup>  | 38.2  | 45.1   | 39.5  | 41.6  | 40.5  | 50.6  | 39.3  | 29.8  | 28.6  | 39.1  | 33.3  | 22.6   | 22.6   |     |
| #562     | 25.4 <sup>a</sup>  | 32.5  | 31.8   | 32.3  | 23.5  | 22.8  | 36.4  | 20.6  | 9.9   | 9.1   | 20.7  | 13.0  | 3.1    | 3.1    |     |
| #563     | 56.6 <sup>a</sup>  | 71.0  | 61.8   | 60.9  | 45.8  | 41.1  | 45.5  | 42.1  | 31.6  | 30.5  | 31.5  | 23.7  | 14.1   | 14.1   |     |
| #564     | 14.8 <sup>a</sup>  | 20.9  | 19.7   | 8.7   | 9.4   | 9.3   | 20.2  | 16.6  | 2.9   | 2.6   | 19.8  | 9.1   | -0.7   | -0.7   |     |
| #565     | -21.9 <sup>a</sup> | -19.3 | -34.9  | -19.3 | -19.1 | -22.0 | -25.6 | -19.9 | -33.8 | -33.2 | -23.6 | -34.9 | -43.5  | -43.5  |     |
| #566     | 28.9 <sup>a</sup>  | 28.1  | 38.3   | 28.9  | 29.9  | 30.0  | 44.8  | 31.0  | 20.0  | 18.8  | 30.3  | 23.4  | 11.8   | 11.8   |     |
| #567     | 29.1 <sup>a</sup>  | 28.2  | 38.4   | 28.9  | 29.5  | 29.8  | 44.7  | 30.9  | 20.1  | 18.8  | 30.4  | 23.4  | 11.8   | 11.8   |     |
| #568     | -1.8 <sup>a</sup>  | 11.5  | -8.8   | 2.5   | -3.8  | 0.8   | 5.7   | -3.7  | -23.1 | -20.7 | -3.3  | -17.9 | -28.6  | -28.4  |     |
| #569     | 17.5 <sup>a</sup>  | 50.2  | 24.3   | 31.2  | 14.8  | 16.7  | 16.2  | 16.7  | -2.6  | -0.4  | 6.1   | -8.6  | -19.4  | -19.2  |     |
| #570     | -10.7 <sup>a</sup> | 21.5  | 0.3    | -4.0  | -6.5  | -6.4  | 16.0  | -5.0  | -21.7 | -21.5 | -3.5  | -16.9 | -28.0  | -27.8  |     |
| #571     | -27.1 <sup>a</sup> | -24.1 | -41.8  | -24.8 | -24.1 | -27.1 | -30.8 | -24.5 | -40.0 | -39.3 | -28.5 | -41.1 | -50.6  | -50.6  |     |
| #572     | 50.1 <sup>a</sup>  | 53.6  | 67.8   | 53.9  | 53.3  | 56.1  | 68.5  | 58.7  | 47.8  | 46.3  | 57.6  | 51.4  | 38.6   | 38.6   |     |
| #573     | 44.1 <sup>a</sup>  | 47.9  | 46.3   | 47.1  | 44.6  | 43.6  | 53.2  | 45.1  | 32.9  | 31.4  | 44.1  | 36.3  | 23.4   | 23.4   |     |
| #574     | 48.2 <sup>a</sup>  | 55.8  | 56.5   | 51.2  | 49.6  | 50.3  | 58.1  | 56.0  | 44.3  | 42.8  | 55.7  | 48.3  | 35.6   | 35.6   |     |
| #575     | -31.8 <sup>a</sup> | -7.1  | -36.4  | -26.1 | -28.2 | -31.5 | -24.2 | -30.7 | -51.6 | -50.0 | -31.5 | -49.3 | -59.4  | -59.4  |     |
| #576     | 58.2 <sup>a</sup>  | 60.7  | 68.0   | 61.1  | 64.8  | 64.2  | 74.1  | 60.3  | 48.1  | 46.5  | 61.0  | 53.9  | 39.9   | 39.9   |     |
| #577     | 59.8 <sup>a</sup>  | 60.0  | 68.3   | 62.6  | 64.4  | 64.0  | 73.5  | 59.3  | 47.3  | 45.6  | 59.8  | 52.8  | 38.8   | 38.8   |     |
| #578     | 65.5 <sup>a</sup>  | 64.4  | 77.2   | 69.4  | 70.9  | 71.7  | 83.9  | 71.7  | 59.9  | 58.2  | 71.5  | 64.8  | 50.8   | 50.8   |     |
| #579     | 55.9 <sup>a</sup>  | 61.6  | 69.2   | 62.1  | 64.7  | 64.6  | 75.6  | 60.6  | 48.4  | 46.8  | 61.2  | 54.0  | 40.0   | 40.0   |     |
| #580     | 57.5 <sup>a</sup>  | 60.7  | 68.0   | 61.1  | 64.8  | 64.2  | 74.1  | 60.3  | 48.1  | 46.5  | 61.0  | 53.9  | 39.9   | 39.9   |     |
| #581     | 47.6 <sup>a</sup>  | 56.2  | 72.8   | 52.9  | 53.8  | 55.7  | 67.6  | 55.8  | 42.8  | 41.4  | 59.3  | 51.1  | 37.5   | 37.5   |     |
| #582     | 22.3 <sup>a</sup>  | 23.0  | 38.6   | 22.3  | 22.5  | 25.7  | 42.0  | 31.9  | 15.9  | 15.4  | 34.0  | 22.7  | 9.2    | 9.3    |     |
| #583     | 40.6 <sup>a</sup>  | 51.2  | 66.6   | 46.8  | 45.9  | 47.9  | 62.1  | 50.7  | 35.6  | 34.2  | 53.3  | 43.2  | 28.6   | 28.6   |     |
| #584     | -41.8 <sup>a</sup> | -38.2 | -62.3  | -41.0 | -39.1 | -42.4 | -46.2 | -38.2 | -58.6 | -57.5 | -43.0 | -59.8 | -71.8  | -71.8  |     |
| #585     | -76.5 <sup>a</sup> | -74.2 | -100.0 | -84.4 | -74.9 | -76.9 | -78.2 | -69.9 | -95.1 | -93.6 | -71.9 | -93.0 | -107.3 | -107.3 |     |
| #586     | 78.1 <sup>a</sup>  | 94.0  | 98.4   | 84.5  | 80.0  | 79.4  | 91.4  | 83.6  | 63.9  | 61.6  | 88.3  | 75.4  | 55.8   | 55.9   |     |

. . . continued on next page . . .

Table S24: . . . continued from previous page . . . .

| Molecule | Ref.                | MNDO  | AMI    | PM3    | PM6    | PM7    | OM1    | OM2    |        | OM3    |        | OM3    |        | D3T    |
|----------|---------------------|-------|--------|--------|--------|--------|--------|--------|--------|--------|--------|--------|--------|--------|
|          |                     |       |        |        |        |        |        | D2     | D3     | D2     | D3     | D2     | D3     |        |
| #587     | -114.0 <sup>a</sup> | -99.1 | -139.3 | -124.4 | -109.7 | -113.7 | -110.1 | -101.1 | -141.0 | -138.5 | -102.6 | -137.2 | -158.2 | -158.1 |
| #593     | 71.0 <sup>a</sup>   | 67.3  | 62.6   | 61.0   | 58.0   | 56.0   | 64.8   | 60.5   | 59.8   | 59.4   | 57.2   | 56.9   | 55.5   | 55.5   |
| #594     | 79.0 <sup>a</sup>   | 72.4  | 86.8   | 91.7   | 96.1   | 93.9   | 75.8   | 87.4   | 86.8   | 86.4   | 80.2   | 79.8   | 78.5   | 78.5   |
| #595     | 22.6 <sup>a</sup>   | 14.4  | 17.3   | 17.9   | 14.1   | 14.4   | 15.8   | 17.0   | 14.9   | 14.6   | 18.6   | 16.9   | 14.9   | 14.9   |
| #599     | 20.0 <sup>a</sup>   | 18.1  | 24.0   | 15.1   | 12.5   | 12.8   | 17.7   | 14.8   | 11.1   | 10.8   | 21.4   | 18.2   | 15.4   | 15.4   |
| #600     | 22.0 <sup>a</sup>   | 15.0  | 21.5   | 15.6   | 13.2   | 13.5   | 16.4   | 17.1   | 13.5   | 13.2   | 28.4   | 25.6   | 22.8   | 22.8   |
| #601     | -4.1 <sup>a</sup>   | -5.8  | -13.2  | -6.2   | -4.6   | -3.1   | 2.6    | 4.1    | 0.2    | 0.0    | -2.7   | -5.9   | -8.9   | -8.9   |
| #602     | 42.9 <sup>a</sup>   | 45.4  | 65.6   | 48.8   | 42.8   | 44.8   | 53.9   | 47.8   | 45.5   | 44.6   | 49.3   | 48.1   | 44.3   | 44.3   |
| #603     | 31.8 <sup>a</sup>   | 33.3  | 50.8   | 31.3   | 34.0   | 33.2   | 46.1   | 40.0   | 37.7   | 36.9   | 39.7   | 38.4   | 34.6   | 34.6   |
| #604     | -12.8 <sup>a</sup>  | -10.6 | -19.1  | -13.3  | -13.1  | -11.3  | -4.7   | -4.1   | -9.8   | -9.8   | -10.5  | -15.3  | -19.2  | -19.2  |
| #606     | 81.3 <sup>a</sup>   | 74.7  | 76.0   | 86.0   | 79.7   | 77.6   | 76.4   | 79.7   | 77.6   | 76.9   | 75.2   | 74.0   | 70.8   | 70.8   |
| #607     | 47.0 <sup>a</sup>   | 35.0  | 43.9   | 38.0   | 45.1   | 40.2   | 47.3   | 44.5   | 41.4   | 40.4   | 41.9   | 40.4   | 35.4   | 35.4   |
| #608     | 46.9 <sup>a</sup>   | 37.8  | 44.2   | 39.3   | 47.6   | 44.3   | 51.7   | 44.9   | 41.9   | 40.9   | 42.0   | 40.4   | 35.5   | 35.5   |
| #609     | 66.5 <sup>a</sup>   | 43.6  | 55.3   | 56.0   | 55.2   | 53.2   | 58.2   | 48.4   | 45.2   | 44.3   | 51.1   | 49.5   | 44.6   | 44.6   |
| #610     | 50.1 <sup>a</sup>   | 48.9  | 45.3   | 57.3   | 50.9   | 48.7   | 43.8   | 47.7   | 44.5   | 44.0   | 43.4   | 41.2   | 37.7   | 37.7   |
| #611     | 21.5 <sup>a</sup>   | 21.6  | 42.8   | 21.3   | 23.5   | 23.8   | 39.7   | 33.5   | 29.9   | 28.9   | 31.4   | 29.1   | 24.3   | 24.3   |
| #612     | 27.3 <sup>a</sup>   | 31.6  | 32.3   | 27.0   | 29.6   | 28.2   | 28.5   | 27.5   | 22.3   | 22.0   | 29.6   | 25.2   | 21.2   | 21.3   |
| #613     | 13.2 <sup>a</sup>   | 9.0   | 12.5   | 9.7    | 13.3   | 12.4   | 21.1   | 26.3   | 20.7   | 20.4   | 26.1   | 22.3   | 17.2   | 17.2   |
| #614     | 6.0 <sup>a</sup>    | -2.8  | -2.4   | -3.9   | 1.4    | 5.2    | 9.4    | 13.5   | 6.5    | 6.6    | 15.3   | 9.8    | 4.8    | 4.9    |
| #615     | 28.2 <sup>a</sup>   | 25.8  | 33.0   | 26.4   | 30.2   | 28.2   | 35.9   | 36.6   | 32.1   | 31.0   | 32.6   | 30.0   | 23.9   | 23.9   |
| #616     | 34.5 <sup>a</sup>   | 29.3  | 30.1   | 28.2   | 32.7   | 31.4   | 41.6   | 36.5   | 31.8   | 30.8   | 32.8   | 30.0   | 23.9   | 23.9   |
| #617     | 31.0 <sup>a</sup>   | 28.3  | 29.1   | 27.5   | 29.2   | 27.8   | 40.6   | 36.0   | 31.3   | 30.4   | 32.6   | 29.9   | 23.8   | 23.8   |
| #618     | 47.1 <sup>a</sup>   | 52.8  | 47.5   | 54.7   | 46.8   | 45.2   | 45.8   | 38.0   | 32.7   | 32.4   | 35.5   | 31.5   | 26.9   | 27.0   |
| #619     | 16.3 <sup>a</sup>   | 16.6  | 36.5   | 16.5   | 18.9   | 18.8   | 34.3   | 28.4   | 23.1   | 22.3   | 26.5   | 22.8   | 17.1   | 17.1   |
| #620     | 15.2 <sup>a</sup>   | 29.4  | 25.5   | 23.0   | 21.0   | 19.1   | 23.8   | 23.7   | 16.7   | 16.5   | 27.6   | 22.1   | 16.9   | 16.9   |
| #621     | 18.9 <sup>a</sup>   | 5.7   | 13.8   | 10.8   | 17.4   | 13.6   | 9.0    | 13.1   | 6.3    | 5.9    | 14.1   | 8.6    | 3.2    | 3.2    |
| #622     | 18.9 <sup>a</sup>   | 5.7   | 13.8   | 10.8   | 17.4   | 13.6   | 9.0    | 13.1   | 6.3    | 5.9    | 14.1   | 8.6    | 3.2    | 3.2    |
| #623     | -8.3 <sup>a</sup>   | -4.9  | -9.2   | -14.0  | -6.3   | -6.6   | -3.4   | -4.1   | -12.9  | -12.7  | 0.2    | -7.4   | -12.7  | -12.7  |
| #624     | 67.1 <sup>a</sup>   | 60.3  | 67.9   | 67.0   | 69.2   | 67.5   | 69.4   | 67.0   | 62.6   | 61.5   | 62.3   | 60.0   | 53.7   | 53.7   |
| #625     | 66.4 <sup>a</sup>   | 59.7  | 63.9   | 66.3   | 66.7   | 63.9   | 68.2   | 63.2   | 58.8   | 57.7   | 60.3   | 57.8   | 51.5   | 51.5   |
| #626     | 67.8 <sup>a</sup>   | 60.9  | 64.9   | 66.7   | 67.2   | 64.9   | 69.0   | 63.6   | 59.2   | 58.1   | 60.7   | 58.3   | 52.0   | 52.0   |
| #627     | 30.1 <sup>a</sup>   | 20.3  | 31.2   | 20.8   | 27.6   | 24.7   | 40.1   | 28.6   | 22.2   | 21.2   | 24.8   | 20.5   | 13.5   | 13.6   |
| #628     | 35.7 <sup>a</sup>   | 38.6  | 30.5   | 45.3   | 38.9   | 36.1   | 31.7   | 36.9   | 30.4   | 30.2   | 32.3   | 27.4   | 22.1   | 22.1   |
| #629     | 48.5 <sup>a</sup>   | 45.3  | 46.7   | 47.6   | 41.8   | 43.7   | 47.4   | 47.9   | 41.5   | 40.5   | 48.9   | 44.7   | 37.5   | 37.5   |
| #630     | 21.6 <sup>a</sup>   | 22.2  | 17.3   | 15.6   | 17.8   | 15.9   | 17.5   | 16.9   | 8.3    | 8.3    | 21.6   | 14.4   | 8.8    | 8.8    |
| #631     | 35.9 <sup>a</sup>   | 33.8  | 57.4   | 34.5   | 39.5   | 45.1   | 57.3   | 38.6   | 28.5   | 28.9   | 47.3   | 38.7   | 32.8   | 32.8   |
| #632     | 11.5 <sup>a</sup>   | 19.5  | 20.9   | 2.8    | 5.1    | 10.8   | 32.6   | 28.3   | 17.4   | 18.0   | 38.9   | 30.5   | 23.3   | 23.4   |
| #633     | 8.6 <sup>a</sup>    | 3.8   | 12.9   | 5.9    | 8.0    | 6.7    | 8.1    | 4.7    | -4.6   | -4.9   | 6.2    | -1.4   | -8.0   | -8.0   |
| #634     | 12.4 <sup>a</sup>   | -0.8  | 6.3    | 5.7    | 11.8   | 8.2    | 2.5    | 8.0    | -0.3   | -0.6   | 8.7    | 2.2    | -4.2   | -4.2   |
| #635     | 43.4 <sup>a</sup>   | 45.9  | 67.1   | 47.7   | 51.1   | 51.5   | 63.8   | 57.5   | 51.4   | 50.2   | 56.6   | 53.2   | 45.1   | 45.1   |
| #636     | 58.1 <sup>a</sup>   | 58.1  | 82.3   | 65.3   | 60.1   | 63.1   | 73.1   | 64.4   | 58.3   | 57.0   | 65.5   | 62.2   | 54.0   | 54.0   |
| #637     | 50.4 <sup>a</sup>   | 49.1  | 57.5   | 47.8   | 43.7   | 43.8   | 50.3   | 47.2   | 39.0   | 38.0   | 52.8   | 47.2   | 39.0   | 39.0   |
| #638     | 30.3 <sup>a</sup>   | 52.6  | 37.6   | 45.6   | 35.1   | 33.7   | 38.5   | 27.4   | 17.0   | 17.4   | 26.0   | 17.6   | 11.3   | 11.3   |
| #639     | 17.8 <sup>a</sup>   | 10.7  | 24.4   | 11.5   | 17.4   | 14.8   | 34.0   | 20.4   | 12.4   | 11.5   | 16.2   | 10.6   | 2.7    | 2.7    |
| #640     | 19.8 <sup>a</sup>   | 19.7  | 18.9   | 18.6   | 21.5   | 22.9   | 20.7   | 25.3   | 14.6   | 14.9   | 24.9   | 15.5   | 8.5    | 8.6    |

. . . continued on next page . . .



Table S24: . . . continued from previous page . . .

| Molecule | Ref.               | MNDO  | AMI   | PM3   | PM6   | PM7   | OM1   | OM2   |       | OM3   |       | D3T   |
|----------|--------------------|-------|-------|-------|-------|-------|-------|-------|-------|-------|-------|-------|
|          |                    |       |       |       |       |       |       | D2    | D3    | D2    | D3    |       |
| #641     | 9.4 <sup>a</sup>   | 5.3   | 17.9  | 3.5   | 2.7   | 5.3   | 16.7  | -5.8  | -17.7 | -17.4 | 1.0   | -16.3 |
| #642     | 86.7 <sup>a</sup>  | 83.9  | 86.1  | 95.0  | 88.5  | 86.2  | 86.8  | 82.6  | 76.7  | 75.5  | 79.2  | 68.2  |
| #643     | 87.8 <sup>a</sup>  | 85.4  | 87.7  | 96.7  | 90.1  | 87.8  | 88.4  | 83.8  | 77.7  | 76.5  | 80.2  | 69.0  |
| #644     | 85.6 <sup>a</sup>  | 84.0  | 86.1  | 94.8  | 88.4  | 86.0  | 86.6  | 82.3  | 76.3  | 75.1  | 78.9  | 67.8  |
| #645     | 78.8 <sup>a</sup>  | 59.1  | 72.8  | 72.3  | 71.1  | 69.4  | 79.6  | 65.0  | 57.8  | 56.5  | 68.2  | 54.9  |
| #646     | 58.1 <sup>a</sup>  | 50.4  | 63.2  | 54.5  | 61.8  | 58.0  | 69.2  | 62.3  | 55.2  | 53.8  | 60.4  | 47.3  |
| #647     | 57.4 <sup>a</sup>  | 52.8  | 65.6  | 56.2  | 64.8  | 63.1  | 73.6  | 64.7  | 57.7  | 56.3  | 61.9  | 48.8  |
| #648     | 32.5 <sup>a</sup>  | 34.3  | 23.2  | 38.8  | 34.0  | 31.4  | 27.3  | 29.1  | 19.0  | 19.0  | 24.7  | 9.6   |
| #649     | 24.0 <sup>a</sup>  | 56.9  | 35.6  | 40.4  | 27.6  | 25.4  | 34.6  | 2.1   | 2.1   | 2.8   | 16.3  | -1.9  |
| #650     | 13.1 <sup>a</sup>  | 2.7   | 18.6  | 2.7   | 8.4   | 5.5   | 28.8  | 12.7  | 2.9   | 2.0   | 8.1   | -8.0  |
| #651     | 22.1 <sup>a</sup>  | 13.9  | 20.3  | 14.3  | 11.0  | 14.7  | 26.8  | 7.0   | -7.1  | -6.3  | 13.6  | -6.2  |
| #652     | 10.0 <sup>a</sup>  | 6.9   | 7.0   | 0.7   | -3.8  | -2.1  | 18.4  | -3.6  | -18.4 | -17.6 | 3.4   | -17.2 |
| #653     | 2.2 <sup>a</sup>   | -10.2 | -7.3  | -5.1  | 2.0   | -1.6  | -7.8  | -1.1  | -12.7 | -12.7 | -0.9  | -18.2 |
| #654     | -8.7 <sup>a</sup>  | 5.1   | 10.2  | -5.0  | -6.4  | -6.1  | 4.2   | -10.7 | -24.5 | -24.4 | -7.2  | -27.3 |
| #655     | -14.2 <sup>a</sup> | -14.3 | -20.1 | -18.4 | -20.2 | -19.0 | -14.6 | -10.3 | -23.6 | -23.3 | -7.5  | -25.3 |
| #656     | 49.8 <sup>a</sup>  | 45.3  | 50.3  | 45.3  | 49.3  | 49.4  | 64.1  | 54.6  | 45.8  | 44.4  | 51.4  | 35.8  |
| #657     | 50.3 <sup>a</sup>  | 47.3  | 51.9  | 46.5  | 48.8  | 48.7  | 64.9  | 55.5  | 46.5  | 45.1  | 52.3  | 36.4  |
| #658     | 49.3 <sup>a</sup>  | 45.3  | 50.6  | 45.3  | 48.0  | 48.1  | 64.1  | 54.5  | 45.7  | 44.4  | 51.2  | 35.6  |
| #659     | 44.8 <sup>a</sup>  | 45.3  | 49.5  | 45.5  | 47.7  | 46.7  | 61.9  | 52.8  | 43.9  | 42.5  | 49.2  | 33.4  |
| #660     | -1.1 <sup>a</sup>  | 14.2  | 5.7   | 0.8   | 2.3   | 0.5   | 6.3   | 4.4   | -10.7 | -10.3 | 3.5   | -18.6 |
| #661     | 69.1 <sup>a</sup>  | 60.8  | 71.9  | 62.7  | 68.2  | 66.4  | 74.0  | 65.1  | 56.2  | 54.4  | 62.4  | 45.9  |
| #662     | 67.9 <sup>a</sup>  | 60.1  | 69.8  | 62.4  | 68.1  | 65.8  | 76.3  | 65.3  | 56.1  | 54.5  | 63.4  | 46.7  |
| #663     | 70.1 <sup>a</sup>  | 61.2  | 68.1  | 62.2  | 67.1  | 64.0  | 76.7  | 63.6  | 54.3  | 52.6  | 62.7  | 45.9  |
| #664     | 41.3 <sup>a</sup>  | 35.8  | 53.1  | 38.2  | 44.5  | 43.3  | 61.9  | 48.2  | 37.8  | 36.4  | 44.8  | 26.8  |
| #665     | 52.7 <sup>a</sup>  | 55.2  | 55.2  | 48.3  | 48.4  | 46.9  | 55.7  | 49.6  | 37.9  | 36.6  | 53.2  | 34.4  |
| #666     | 14.6 <sup>a</sup>  | 56.7  | 27.9  | 34.4  | 23.6  | 20.4  | 30.4  | 10.5  | -7.4  | -6.2  | 12.0  | -12.3 |
| #667     | 15.3 <sup>a</sup>  | 55.1  | 26.7  | 33.0  | 21.7  | 18.2  | 28.2  | 8.4   | -9.4  | -8.3  | 10.0  | -14.3 |
| #668     | 19.0 <sup>a</sup>  | 66.4  | 33.3  | 37.3  | 25.1  | 22.5  | 36.1  | 11.4  | -7.6  | -6.0  | 13.7  | -11.5 |
| #669     | 80.9 <sup>a</sup>  | 71.8  | 93.0  | 78.9  | 85.6  | 86.2  | 102.4 | 90.1  | 79.2  | 77.3  | 87.1  | 67.4  |
| #670     | 89.9 <sup>a</sup>  | 72.7  | 90.2  | 84.7  | 86.1  | 86.2  | 97.2  | 77.4  | 65.9  | 64.2  | 83.3  | 63.1  |
| #671     | 107.7 <sup>a</sup> | 83.6  | 95.4  | 92.9  | 91.9  | 90.0  | 96.5  | 86.4  | 74.1  | 72.2  | 91.8  | 70.6  |
| #672     | 96.9 <sup>a</sup>  | 81.5  | 100.1 | 90.7  | 95.9  | 95.3  | 90.3  | 91.0  | 80.4  | 78.3  | 91.7  | 72.3  |
| #673     | 50.0 <sup>a</sup>  | 43.1  | 55.6  | 43.4  | 46.6  | 45.8  | 63.3  | 46.1  | 33.9  | 32.1  | 44.5  | 23.2  |
| #674     | 0.8 <sup>a</sup>   | 17.8  | 1.9   | 2.6   | 0.9   | 0.9   | 12.0  | 8.2   | -13.8 | -12.2 | 10.4  | -19.4 |
| #677     | 45.4 <sup>a</sup>  | 53.7  | 49.3  | 48.0  | 47.1  | 48.5  | 50.3  | 47.2  | 28.9  | 28.6  | 49.9  | 22.8  |
| #680     | 101.8 <sup>a</sup> | 91.2  | 112.8 | 97.7  | 102.2 | 102.6 | 119.7 | 101.2 | 84.0  | 81.3  | 99.8  | 69.6  |
| #681     | -26.7 <sup>a</sup> | 49.7  | -20.4 | -13.2 | -25.4 | -33.2 | -0.8  | -33.3 | -76.5 | -73.5 | -28.9 | -84.8 |
| #690     | 124.4 <sup>a</sup> | 110.5 | 113.3 | 126.9 | 119.3 | 116.8 | 118.7 | 116.1 | 115.1 | 115.1 | 111.4 | 105.4 |
| #691     | 101.0 <sup>a</sup> | 96.2  | 92.8  | 104.4 | 96.3  | 94.8  | 92.2  | 85.6  | 81.3  | 80.5  | 80.1  | 72.5  |
| #693     | 121.8 <sup>a</sup> | 116.9 | 120.2 | 132.7 | 123.6 | 120.8 | 124.0 | 117.3 | 110.5 | 109.0 | 111.9 | 99.3  |
| #694     | 129.2 <sup>a</sup> | 126.8 | 123.4 | 134.7 | 124.1 | 122.0 | 119.2 | 111.3 | 99.7  | 98.4  | 106.4 | 87.2  |
| #695     | 94.3 <sup>a</sup>  | 88.7  | 110.8 | 94.9  | 102.6 | 100.8 | 115.4 | 99.9  | 85.6  | 82.7  | 95.8  | 69.7  |
| #698     | 76.6 <sup>a</sup>  | 53.8  | 109.6 | 86.2  | 80.4  | 75.0  | 75.6  | 70.7  | 69.3  | 68.3  | 73.5  | 69.6  |
| #699     | 79.9 <sup>a</sup>  | 58.1  | 113.3 | 88.4  | 79.9  | 76.4  | 76.9  | 72.0  | 70.6  | 69.6  | 74.1  | 70.3  |
| #701     | 47.6 <sup>a</sup>  | 51.5  | 67.2  | 24.2  | 28.0  | 31.4  | 68.0  | 63.9  | 50.1  | 50.9  | 84.4  | 64.7  |

. . . continued on next page . . .

Table S24: . . . continued from previous page . . .

| Molecule | Ref.                | MNDO   | AMI    | PM3    | PM6    | PM7    | OM1    | OM2    |        | OM3    |        | D3T    |        |
|----------|---------------------|--------|--------|--------|--------|--------|--------|--------|--------|--------|--------|--------|--------|
|          |                     |        |        |        |        |        |        | D2     | D3     | D2     | D3     |        |        |
| #705     | 12.4 <sup>a</sup>   | 21.5   | 64.4   | 24.8   | 42.4   | 32.5   | 48.6   | 68.5   | 63.5   | 61.8   | 60.1   | 56.7   | 49.7   |
| #729     | -26.0 <sup>a</sup>  | -32.9  | -31.5  | -34.1  | -20.7  | -25.5  | -34.3  | -30.3  | -30.7  | -30.9  | -31.9  | -32.1  | -32.8  |
| #735     | -48.1 <sup>a</sup>  | -57.4  | -57.0  | -51.9  | -48.3  | -48.9  | -51.0  | -49.3  | -50.2  | -50.3  | -49.8  | -50.4  | -51.4  |
| #741     | -11.4 <sup>a</sup>  | -6.8   | -5.7   | -9.2   | -18.5  | -18.8  | -9.9   | -5.1   | -5.7   | -6.1   | -11.0  | -11.3  | -12.6  |
| #744     | -39.7 <sup>a</sup>  | -42.3  | -41.6  | -44.2  | -38.2  | -41.1  | -45.2  | -44.2  | -45.5  | -45.8  | -46.5  | -47.3  | -49.1  |
| #747     | -44.0 <sup>a</sup>  | -51.2  | -53.2  | -48.3  | -45.8  | -45.0  | -43.8  | -45.6  | -47.7  | -47.7  | -42.8  | -44.5  | -46.2  |
| #754     | -52.0 <sup>a</sup>  | -49.4  | -49.2  | -53.3  | -54.4  | -55.5  | -52.5  | -57.6  | -60.3  | -60.5  | -59.4  | -61.3  | -64.0  |
| #762     | -8.3 <sup>a</sup>   | -8.6   | 3.0    | -4.0   | -8.3   | -5.7   | -1.8   | -2.9   | -5.2   | -5.9   | -2.7   | -3.8   | -7.4   |
| #1053    | -90.5 <sup>a</sup>  | -92.6  | -97.4  | -94.4  | -87.9  | -89.5  | -91.7  | -86.9  | -87.5  | -87.8  | -88.2  | -88.6  | -89.7  |
| #1054    | -50.7 <sup>a</sup>  | -61.4  | -58.7  | -64.3  | -45.9  | -52.5  | -62.9  | -59.1  | -60.3  | -60.6  | -61.8  | -62.5  | -64.2  |
| #1059    | -83.6 <sup>a</sup>  | -85.5  | -91.0  | -87.0  | -84.4  | -84.0  | -83.5  | -81.4  | -83.3  | -83.5  | -79.4  | -80.6  | -82.6  |
| #1096    | -29.3 <sup>a</sup>  | -32.9  | -25.1  | -31.5  | -27.7  | -28.4  | -26.1  | -32.5  | -37.2  | -37.9  | -32.9  | -35.3  | -41.3  |
| #1376    | -194.9 <sup>a</sup> | -186.8 | -201.2 | -197.5 | -185.9 | -196.3 | -190.2 | -188.3 | -190.9 | -191.4 | -193.2 | -195.3 | -198.0 |
| #727     | 199.0 <sup>a</sup>  | 184.9  | 187.5  | 176.9  | 182.5  | 182.4  | 174.8  | 194.8  | 194.6  | 194.5  | 192.6  | 192.5  | 192.0  |
| #728     | 10.4 <sup>a</sup>   | -0.3   | -1.0   | -9.3   | -3.6   | -2.5   | -6.3   | 0.1    | -0.1   | -0.3   | -4.4   | -4.4   | -4.9   |
| #731     | 168.0 <sup>a</sup>  | 155.6  | 161.3  | 166.3  | 167.6  | 167.7  | 157.4  | 166.4  | 165.9  | 165.7  | 172.4  | 172.1  | 171.2  |
| #733     | -0.5 <sup>a</sup>   | -0.2   | -3.7   | -6.8   | 5.2    | 0.2    | 2.7    | 0.4    | -0.2   | -0.4   | 1.3    | 0.9    | -0.0   |
| #734     | -36.0 <sup>a</sup>  | -39.7  | -38.5  | -37.9  | -34.0  | -32.0  | -34.1  | -46.1  | -46.7  | -46.9  | -51.1  | -51.6  | -52.4  |
| #745     | -12.6 <sup>a</sup>  | -15.5  | -9.0   | -8.1   | -10.1  | -11.3  | -15.7  | -13.3  | -14.6  | -14.8  | -8.8   | -9.7   | -11.2  |
| #746     | -47.5 <sup>a</sup>  | -45.3  | -45.5  | -44.8  | -46.3  | -44.2  | -38.9  | -52.7  | -54.5  | -54.6  | -58.1  | -59.4  | -61.2  |
| #749     | -56.2 <sup>a</sup>  | -63.0  | -62.7  | -56.9  | -54.9  | -55.9  | -59.5  | -56.9  | -59.0  | -59.1  | -57.2  | -58.8  | -60.8  |
| #755     | -45.5 <sup>a</sup>  | -48.0  | -48.3  | -49.3  | -42.5  | -46.0  | -50.7  | -49.1  | -52.0  | -52.1  | -51.2  | -53.3  | -55.9  |
| #756     | -19.2 <sup>a</sup>  | -37.2  | -25.5  | -26.7  | -29.1  | -25.4  | -21.8  | -17.7  | -20.6  | -20.6  | -15.8  | -17.9  | -20.5  |
| #757     | -65.1 <sup>a</sup>  | -65.1  | -69.5  | -65.8  | -67.2  | -67.2  | -63.8  | -66.7  | -70.6  | -70.5  | -67.2  | -70.3  | -73.1  |
| #758     | -51.7 <sup>a</sup>  | -56.6  | -58.8  | -52.9  | -52.2  | -51.9  | -52.6  | -53.4  | -56.8  | -56.8  | -50.6  | -53.3  | -56.0  |
| #759     | -61.2 <sup>a</sup>  | -67.5  | -70.6  | -63.6  | -61.4  | -62.2  | -63.6  | -61.5  | -65.4  | -65.3  | -62.5  | -65.6  | -68.4  |
| #760     | 15.6 <sup>a</sup>   | 12.4   | 16.3   | 8.9    | 16.0   | 16.5   | 15.0   | 11.2   | 8.9    | 8.5    | 9.8    | 8.5    | 5.5    |
| #763     | -17.3 <sup>a</sup>  | -29.8  | -24.7  | -24.8  | -27.3  | -25.1  | -21.2  | -19.1  | -22.5  | -22.9  | -19.0  | -21.1  | -25.0  |
| #764     | -24.0 <sup>a</sup>  | -28.0  | -27.0  | -28.9  | -23.1  | -25.7  | -28.8  | -27.9  | -31.0  | -31.5  | -29.5  | -31.6  | -35.1  |
| #765     | -3.3 <sup>a</sup>   | -2.8   | 0.9    | -0.7   | -7.3   | -7.1   | 0.7    | 4.0    | 0.9    | 0.4    | 4.8    | 2.7    | -0.7   |
| #766     | -48.9 <sup>a</sup>  | -52.8  | -55.1  | -54.7  | -47.4  | -50.8  | -55.9  | -53.7  | -58.1  | -58.1  | -56.0  | -59.4  | -62.9  |
| #767     | -51.6 <sup>a</sup>  | -50.5  | -53.1  | -54.8  | -47.6  | -51.1  | -54.8  | -56.0  | -60.8  | -60.7  | -57.1  | -60.8  | -64.3  |
| #768     | -57.1 <sup>a</sup>  | -54.0  | -55.2  | -57.4  | -57.5  | -59.4  | -58.2  | -62.4  | -66.8  | -66.9  | -63.7  | -67.0  | -70.7  |
| #769     | -44.0 <sup>a</sup>  | -59.3  | -58.4  | -51.3  | -51.4  | -49.0  | -50.1  | -47.9  | -52.6  | -52.5  | -46.1  | -49.3  | -53.5  |
| #770     | -60.3 <sup>a</sup>  | -62.0  | -64.4  | -57.4  | -58.5  | -58.9  | -61.4  | -61.1  | -65.9  | -65.9  | -58.4  | -62.2  | -65.7  |
| #771     | -74.7 <sup>a</sup>  | -64.3  | -71.6  | -71.3  | -75.1  | -74.8  | -68.2  | -76.8  | -82.9  | -82.5  | -75.9  | -80.9  | -84.5  |
| #773     | -31.1 <sup>a</sup>  | -39.8  | -31.5  | -33.6  | -38.0  | -35.9  | -29.6  | -30.2  | -35.0  | -35.4  | -30.2  | -33.4  | -38.2  |
| #774     | -31.4 <sup>a</sup>  | -30.6  | -29.9  | -31.5  | -24.4  | -28.1  | -30.2  | -32.1  | -37.3  | -37.6  | -32.9  | -36.8  | -41.2  |
| #775     | -27.0 <sup>a</sup>  | -39.3  | -38.1  | -33.3  | -36.8  | -34.5  | -27.5  | -24.5  | -30.1  | -30.1  | -24.3  | -28.0  | -33.0  |
| #776     | -32.6 <sup>a</sup>  | -35.4  | -34.6  | -37.8  | -39.5  | -40.7  | -37.1  | -42.0  | -46.5  | -47.0  | -43.1  | -46.2  | -50.8  |
| #777     | -46.0 <sup>a</sup>  | -57.0  | -55.3  | -55.2  | -53.9  | -53.6  | -55.1  | -55.0  | -60.6  | -60.6  | -57.5  | -61.3  | -66.1  |
| #778     | -61.6 <sup>a</sup>  | -58.6  | -61.1  | -61.5  | -60.5  | -63.4  | -63.3  | -67.1  | -73.4  | -73.4  | -67.9  | -72.0  | -76.7  |
| #779     | -53.4 <sup>a</sup>  | -62.0  | -67.1  | -57.4  | -58.4  | -56.0  | -54.6  | -53.1  | -60.2  | -59.7  | -51.7  | -57.0  | -61.8  |
| #780     | -67.8 <sup>a</sup>  | -54.6  | -64.8  | -64.4  | -69.8  | -68.2  | -59.1  | -70.5  | -78.5  | -77.9  | -66.1  | -73.0  | -77.2  |
| #781     | -40.5 <sup>a</sup>  | -42.2  | -41.0  | -44.1  | -51.1  | -50.9  | -29.6  | -39.2  | -43.6  | -44.3  | -46.2  | -48.5  | -54.4  |

. . . continued on next page . . .

Table S24: . . . continued from previous page . . .

| Molecule | Ref.               | MNDO  | AMI   | PM3   | PM6   | PM7   | OM1   | OM2   |       | OM3   |       | D3T   |       |
|----------|--------------------|-------|-------|-------|-------|-------|-------|-------|-------|-------|-------|-------|-------|
|          |                    |       |       |       |       |       |       | D2    | D3    | D2    | D3    |       |       |
| #782     | -23.0 <sup>a</sup> | -26.7 | -22.2 | -21.7 | -21.2 | -22.2 | -23.1 | -21.7 | -26.5 | -27.2 | -23.6 | -26.2 | -32.3 |
| #783     | -42.6 <sup>a</sup> | -40.8 | -41.4 | -44.5 | -51.3 | -51.2 | -41.7 | -51.2 | -57.8 | -58.0 | -51.7 | -56.7 | -62.3 |
| #784     | -54.0 <sup>a</sup> | -60.1 | -63.3 | -60.2 | -59.8 | -59.5 | -59.5 | -59.9 | -68.1 | -67.6 | -62.1 | -68.0 | -73.8 |
| #785     | -76.6 <sup>a</sup> | -50.8 | -61.5 | -67.4 | -68.0 | -70.2 | -67.5 | -76.9 | -86.1 | -85.5 | -75.4 | -83.0 | -88.2 |
| #786     | -76.3 <sup>a</sup> | -62.4 | -72.0 | -69.7 | -77.1 | -76.1 | -67.7 | -76.1 | -85.8 | -85.2 | -72.6 | -80.7 | -85.9 |
| #787     | -8.8 <sup>a</sup>  | -9.9  | -8.9  | -10.6 | -3.0  | -6.1  | -14.0 | -14.5 | -20.1 | -20.9 | -15.6 | -18.7 | -25.6 |
| #788     | -17.3 <sup>a</sup> | -17.7 | -15.8 | -14.6 | -16.9 | -17.1 | -14.0 | -16.0 | -22.4 | -23.0 | -14.1 | -18.1 | -25.0 |
| #789     | -30.7 <sup>a</sup> | -34.2 | -29.8 | -31.0 | -32.0 | -32.3 | -28.2 | -31.1 | -37.6 | -38.3 | -32.6 | -36.7 | -43.7 |
| #790     | -30.9 <sup>a</sup> | -33.2 | -29.0 | -29.6 | -29.3 | -30.8 | -27.9 | -30.5 | -37.1 | -37.7 | -32.0 | -36.0 | -43.1 |
| #791     | -29.9 <sup>a</sup> | -34.5 | -29.8 | -30.9 | -30.2 | -31.3 | -27.9 | -30.6 | -37.0 | -37.7 | -32.2 | -36.2 | -43.3 |
| #792     | 11.0 <sup>a</sup>  | 5.3   | 8.3   | 7.0   | 5.3   | 7.0   | 15.9  | 6.8   | 0.1   | -0.4  | 7.6   | 2.7   | -3.3  |
| #793     | -40.8 <sup>a</sup> | -37.3 | -39.0 | -43.1 | -41.7 | -40.3 | -39.6 | -45.8 | -55.3 | -54.7 | -46.7 | -53.4 | -60.3 |
| #794     | -12.9 <sup>a</sup> | 2.9   | 4.7   | 0.9   | -3.8  | -2.1  | -1.5  | -6.8  | -16.3 | -15.5 | -1.8  | -8.3  | -15.1 |
| #795     | -32.0 <sup>a</sup> | -37.6 | -36.5 | -40.7 | -38.9 | -37.4 | -37.8 | -41.2 | -50.6 | -50.0 | -42.4 | -49.1 | -55.9 |
| #796     | -38.5 <sup>a</sup> | -49.0 | -49.7 | -43.6 | -47.2 | -45.3 | -37.0 | -37.0 | -46.2 | -45.9 | -35.9 | -42.7 | -49.5 |
| #797     | -52.0 <sup>a</sup> | -51.0 | -59.7 | -55.8 | -54.5 | -52.5 | -49.8 | -52.9 | -64.1 | -62.9 | -52.6 | -61.0 | -67.7 |
| #798     | -36.4 <sup>a</sup> | -35.6 | -33.7 | -28.7 | -33.6 | -31.9 | -32.0 | -27.6 | -38.3 | -37.1 | -25.1 | -33.4 | -39.4 |
| #799     | -59.3 <sup>a</sup> | -59.4 | -65.5 | -60.1 | -61.1 | -60.7 | -60.3 | -59.3 | -70.1 | -69.2 | -61.7 | -70.1 | -76.5 |
| #800     | -74.4 <sup>a</sup> | -63.0 | -69.4 | -71.4 | -70.3 | -74.2 | -71.8 | -80.7 | -91.0 | -90.6 | -79.8 | -88.2 | -94.6 |
| #801     | -71.9 <sup>a</sup> | -73.7 | -87.1 | -77.4 | -77.7 | -76.3 | -72.2 | -73.9 | -86.3 | -84.9 | -74.1 | -84.3 | -90.6 |
| #802     | -72.6 <sup>a</sup> | -52.2 | -66.3 | -71.3 | -71.4 | -74.0 | -65.7 | -80.2 | -91.7 | -90.8 | -78.4 | -88.1 | -94.1 |
| #803     | -71.3 <sup>a</sup> | -69.2 | -75.0 | -72.5 | -71.4 | -74.1 | -74.1 | -76.3 | -86.0 | -85.7 | -77.6 | -85.1 | -91.2 |
| #804     | -63.1 <sup>a</sup> | -66.9 | -75.7 | -70.9 | -62.4 | -66.1 | -71.3 | -67.4 | -76.8 | -76.4 | -70.5 | -78.0 | -84.1 |
| #805     | -75.0 <sup>a</sup> | -55.3 | -67.4 | -71.6 | -71.0 | -74.4 | -67.9 | -81.3 | -92.4 | -91.7 | -79.3 | -88.6 | -94.7 |
| #806     | -81.2 <sup>a</sup> | -86.6 | -96.9 | -83.8 | -80.0 | -81.3 | -85.5 | -80.1 | -90.4 | -89.8 | -81.5 | -89.8 | -96.1 |
| #807     | -85.5 <sup>a</sup> | -60.4 | -73.6 | -74.7 | -84.7 | -83.7 | -72.0 | -86.6 | -98.4 | -97.6 | -81.4 | -91.7 | -97.6 |
| #808     | 3.3 <sup>a</sup>   | 3.9   | 20.8  | 12.0  | 8.1   | 9.8   | 14.1  | 9.2   | 3.1   | 2.1   | 9.3   | 6.1   | -1.8  |
| #809     | -7.2 <sup>a</sup>  | -20.3 | -14.6 | -13.1 | -14.8 | -12.2 | -11.1 | -16.2 | -23.5 | -24.3 | -13.8 | -18.1 | -26.3 |
| #810     | -11.0 <sup>a</sup> | -9.4  | -4.8  | -4.5  | -8.3  | -9.4  | -4.9  | -7.3  | -14.5 | -15.4 | -7.9  | -12.3 | -20.4 |
| #811     | -11.1 <sup>a</sup> | -22.0 | -11.8 | -13.7 | -16.3 | -14.9 | -12.2 | -14.8 | -22.1 | -22.8 | -14.2 | -18.5 | -26.6 |
| #812     | -20.7 <sup>a</sup> | -17.0 | -15.0 | -17.7 | -17.8 | -19.7 | -20.3 | -27.4 | -34.7 | -35.5 | -27.6 | -32.1 | -40.0 |
| #813     | -37.6 <sup>a</sup> | -35.9 | -35.7 | -39.3 | -38.9 | -39.7 | -30.4 | -39.5 | -48.3 | -48.7 | -39.8 | -45.8 | -53.8 |
| #814     | -39.0 <sup>a</sup> | -40.2 | -37.0 | -40.1 | -38.7 | -40.0 | -32.0 | -39.5 | -47.8 | -48.4 | -40.3 | -46.0 | -54.0 |
| #815     | -38.7 <sup>a</sup> | -40.0 | -37.0 | -40.2 | -39.8 | -40.7 | -32.3 | -39.9 | -48.2 | -48.8 | -40.6 | -46.3 | -54.3 |
| #816     | -38.7 <sup>a</sup> | -38.5 | -36.1 | -38.7 | -37.7 | -39.5 | -32.0 | -39.0 | -47.9 | -48.0 | -40.0 | -45.3 | -53.8 |
| #817     | -34.7 <sup>a</sup> | -35.2 | -34.5 | -33.0 | -33.5 | -34.9 | -31.8 | -35.1 | -43.7 | -44.2 | -36.4 | -42.2 | -50.2 |
| #818     | -37.4 <sup>a</sup> | -39.5 | -36.7 | -39.6 | -39.5 | -40.5 | -31.9 | -39.9 | -48.5 | -49.0 | -40.6 | -46.6 | -54.5 |
| #819     | -38.6 <sup>a</sup> | -41.6 | -37.4 | -40.3 | -43.0 | -42.4 | -33.3 | -40.5 | -48.7 | -49.3 | -41.6 | -47.1 | -55.1 |
| #820     | -34.9 <sup>a</sup> | -39.0 | -35.6 | -35.6 | -35.8 | -36.9 | -33.3 | -35.8 | -44.2 | -44.8 | -37.2 | -42.8 | -50.8 |
| #821     | -34.5 <sup>a</sup> | -39.3 | -35.6 | -35.6 | -34.5 | -36.1 | -32.9 | -35.3 | -43.6 | -44.2 | -36.8 | -42.4 | -50.4 |
| #822     | -22.6 <sup>a</sup> | -34.0 | -38.2 | -30.9 | -30.8 | -30.9 | -31.5 | -31.5 | -39.8 | -40.4 | -32.1 | -37.7 | -45.7 |
| #823     | -24.3 <sup>a</sup> | -23.6 | -21.5 | -19.1 | -23.8 | -24.4 | -23.2 | -24.0 | -31.8 | -32.4 | -22.1 | -27.2 | -35.0 |
| #824     | -26.3 <sup>a</sup> | -23.6 | -21.3 | -20.4 | -24.9 | -25.3 | -22.6 | -23.5 | -31.8 | -32.4 | -21.7 | -27.2 | -35.1 |
| #825     | -48.9 <sup>a</sup> | -40.7 | -43.4 | -49.8 | -49.7 | -47.8 | -43.8 | -54.8 | -66.6 | -65.7 | -54.8 | -63.4 | -71.2 |
| #826     | -52.2 <sup>a</sup> | -53.2 | -61.5 | -57.8 | -58.4 | -56.4 | -54.2 | -57.3 | -69.6 | -68.5 | -58.8 | -67.5 | -75.6 |

. . . continued on next page . . .

Table S24: . . . continued from previous page . . .

| Molecule | Ref.               | MNDO  | AMI1   | PM3   | PM6   | PM7   | OM1   | OM2   |        | OM3    |        | D3T    |
|----------|--------------------|-------|--------|-------|-------|-------|-------|-------|--------|--------|--------|--------|
|          |                    |       |        |       |       |       |       | D2    | D3     | D2     | D3     |        |
| #827     | -52.0 <sup>a</sup> | -51.9 | -58.1  | -56.4 | -56.2 | -54.5 | -53.0 | -57.0 | -69.4  | -68.2  | -68.1  | -74.7  |
| #828     | -52.9 <sup>a</sup> | -51.9 | -59.1  | -57.4 | -58.9 | -56.4 | -53.5 | -58.1 | -70.4  | -69.3  | -69.2  | -76.1  |
| #829     | -46.2 <sup>a</sup> | -52.5 | -56.4  | -54.7 | -54.0 | -52.4 | -52.0 | -54.6 | -67.0  | -65.8  | -65.7  | -72.7  |
| #830     | -55.0 <sup>a</sup> | -63.9 | -63.6  | -62.0 | -60.3 | -58.0 | -59.3 | -60.3 | -71.6  | -70.9  | -70.9  | -78.3  |
| #831     | -49.4 <sup>a</sup> | -48.0 | -47.9  | -48.4 | -47.3 | -45.2 | -44.7 | -46.3 | -57.4  | -56.8  | -56.7  | -65.0  |
| #832     | -53.2 <sup>a</sup> | -57.9 | -70.2  | -57.1 | -59.9 | -55.2 | -51.1 | -50.1 | -64.2  | -62.5  | -62.4  | -67.3  |
| #833     | -60.1 <sup>a</sup> | -49.3 | -54.4  | -56.8 | -59.3 | -60.6 | -50.3 | -57.8 | -67.8  | -67.8  | -67.8  | -74.4  |
| #834     | 6.4 <sup>a</sup>   | 50.4  | 43.3   | 49.8  | 27.9  | 30.2  | 37.1  | 28.7  | 16.0   | 17.1   | 17.2   | 16.7   |
| #835     | -68.0 <sup>a</sup> | -65.9 | -81.4  | -70.0 | -71.4 | -68.1 | -63.5 | -64.5 | -78.5  | -76.9  | -76.8  | -83.7  |
| #836     | -39.5 <sup>a</sup> | -34.2 | -35.6  | -29.1 | -34.5 | -32.6 | -30.6 | -24.6 | -37.8  | -36.3  | -36.2  | -40.3  |
| #837     | -65.1 <sup>a</sup> | -61.4 | -71.1  | -64.4 | -65.7 | -65.7 | -63.9 | -62.8 | -76.0  | -74.8  | -74.7  | -83.6  |
| #838     | -80.9 <sup>a</sup> | -56.4 | -71.0  | -76.6 | -75.9 | -79.9 | -71.9 | -88.0 | -101.4 | -100.5 | -100.4 | -103.5 |
| #839     | -82.5 <sup>a</sup> | -73.5 | -82.6  | -79.2 | -77.9 | -80.1 | -78.9 | -80.7 | -91.7  | -91.3  | -91.3  | -98.9  |
| #840     | -78.5 <sup>a</sup> | -48.4 | -69.1  | -74.6 | -75.9 | -78.7 | -67.3 | -86.2 | -100.6 | -99.3  | -99.2  | -102.4 |
| #841     | -80.9 <sup>a</sup> | -73.9 | -81.7  | -77.8 | -75.9 | -78.9 | -79.2 | -80.9 | -92.1  | -91.7  | -91.6  | -98.5  |
| #842     | -83.5 <sup>a</sup> | -73.9 | -81.8  | -77.9 | -76.3 | -79.2 | -79.2 | -80.9 | -92.3  | -91.9  | -91.8  | -98.3  |
| #843     | -69.8 <sup>a</sup> | -71.6 | -82.5  | -76.4 | -67.4 | -71.2 | -76.5 | -72.0 | -83.0  | -82.5  | -82.5  | -91.2  |
| #844     | -85.3 <sup>a</sup> | -91.3 | -103.7 | -89.3 | -85.0 | -86.4 | -90.7 | -84.7 | -96.6  | -95.9  | -95.9  | -103.1 |
| #845     | -86.3 <sup>a</sup> | -69.0 | -83.8  | -79.7 | -86.3 | -85.6 | -82.6 | -87.8 | -100.5 | -99.7  | -99.6  | -101.1 |
| #846     | -90.8 <sup>a</sup> | -63.1 | -79.7  | -79.5 | -88.9 | -88.4 | -76.6 | -90.9 | -105.2 | -104.0 | -103.9 | -104.5 |
| #847     | -79.8 <sup>a</sup> | -80.9 | -91.6  | -78.8 | -78.6 | -79.1 | -82.5 | -80.1 | -91.4  | -90.9  | -90.9  | -93.9  |
| #848     | -86.3 <sup>a</sup> | -68.9 | -84.7  | -79.5 | -85.8 | -86.0 | -77.3 | -85.2 | -98.8  | -97.8  | -97.8  | -99.6  |
| #849     | -88.0 <sup>a</sup> | -65.2 | -81.5  | -79.2 | -87.1 | -86.4 | -76.2 | -89.6 | -103.1 | -102.2 | -102.1 | -102.7 |
| #850     | -86.3 <sup>a</sup> | -51.6 | -71.4  | -78.0 | -90.9 | -88.5 | -69.7 | -92.3 | -107.2 | -105.9 | -105.7 | -104.9 |
| #851     | -88.0 <sup>a</sup> | -65.2 | -81.5  | -79.6 | -87.1 | -86.4 | -76.2 | -89.6 | -103.1 | -102.2 | -102.1 | -102.7 |
| #852     | -15.1 <sup>a</sup> | -26.7 | -27.8  | -22.5 | -25.1 | -23.0 | -17.1 | -22.2 | -32.0  | -32.4  | -32.3  | -35.0  |
| #853     | -19.7 <sup>a</sup> | -28.7 | -24.6  | -22.2 | -25.9 | -25.0 | -18.7 | -21.8 | -31.5  | -31.9  | -31.8  | -36.0  |
| #854     | -22.6 <sup>a</sup> | -20.7 | -22.0  | -24.7 | -26.9 | -28.2 | -26.0 | -32.3 | -41.5  | -42.3  | -42.2  | -48.4  |
| #855     | -41.9 <sup>a</sup> | -37.1 | -38.4  | -38.0 | -39.2 | -40.9 | -35.1 | -41.4 | -52.2  | -52.5  | -52.4  | -58.3  |
| #856     | -42.3 <sup>a</sup> | -46.1 | -43.6  | -47.9 | -47.2 | -48.8 | -36.7 | -48.4 | -58.5  | -59.1  | -59.0  | -64.8  |
| #857     | -41.9 <sup>a</sup> | -39.5 | -39.5  | -40.3 | -40.9 | -42.1 | -36.0 | -42.1 | -52.8  | -53.1  | -53.1  | -59.3  |
| #858     | -41.9 <sup>a</sup> | -39.9 | -39.5  | -40.3 | -39.8 | -41.3 | -35.5 | -41.6 | -52.2  | -52.5  | -52.5  | -58.8  |
| #859     | -55.6 <sup>a</sup> | -39.8 | -47.3  | -50.8 | -52.8 | -53.8 | -42.7 | -57.7 | -70.9  | -70.3  | -70.2  | -74.4  |
| #860     | -57.3 <sup>a</sup> | -58.3 | -67.5  | -61.1 | -62.2 | -60.6 | -57.6 | -60.4 | -75.5  | -73.9  | -73.8  | -81.6  |
| #861     | -59.7 <sup>a</sup> | -64.1 | -70.7  | -65.6 | -66.3 | -63.1 | -61.4 | -62.3 | -76.3  | -75.2  | -75.1  | -84.4  |
| #862     | -59.6 <sup>a</sup> | -61.9 | -69.1  | -65.7 | -65.9 | -63.1 | -61.0 | -64.1 | -78.0  | -76.8  | -76.8  | -85.7  |
| #863     | -66.9 <sup>a</sup> | -61.6 | -76.6  | -68.8 | -70.1 | -70.2 | -65.8 | -64.1 | -79.9  | -78.5  | -78.4  | -88.4  |
| #864     | -85.5 <sup>a</sup> | -69.6 | -83.7  | -83.1 | -84.1 | -85.7 | -79.8 | -89.1 | -103.4 | -102.6 | -102.5 | -108.7 |
| #865     | -81.4 <sup>a</sup> | -78.2 | -89.5  | -84.6 | -82.9 | -85.2 | -84.0 | -85.3 | -97.9  | -97.4  | -97.4  | -106.0 |
| #866     | -83.1 <sup>a</sup> | -37.4 | -69.5  | -77.9 | -81.0 | -83.2 | -65.1 | -92.4 | -110.3 | -108.3 | -108.1 | -110.0 |
| #867     | -82.4 <sup>a</sup> | -78.6 | -88.6  | -83.2 | -81.2 | -84.2 | -84.5 | -84.5 | -98.5  | -96.5  | -96.5  | -105.0 |
| #868     | -82.7 <sup>a</sup> | -43.5 | -68.7  | -78.7 | -79.0 | -82.4 | -67.4 | -89.3 | -108.8 | -107.4 | -107.2 | -108.7 |
| #869     | -89.8 <sup>a</sup> | -96.0 | -110.6 | -94.7 | -90.0 | -91.5 | -95.8 | -92.2 | -102.8 | -101.9 | -101.9 | -110.2 |
| #870     | -91.0 <sup>a</sup> | -73.7 | -90.4  | -85.8 | -91.8 | -91.0 | -83.4 | -92.4 | -106.8 | -105.8 | -105.7 | -108.2 |
| #871     | -91.3 <sup>a</sup> | -71.4 | -88.6  | -84.1 | -89.6 | -89.7 | -82.6 | -91.7 | -106.7 | -105.6 | -105.6 | -107.5 |

. . . continued on next page . . .

Table S24: . . . continued from previous page . . .

| Molecule | Ref.                | MNDO   | AMI    | PM3    | PM6    | PM7    | OM1    | OM2    |        | OM3    |        | D3T    | D3T    |
|----------|---------------------|--------|--------|--------|--------|--------|--------|--------|--------|--------|--------|--------|--------|
|          |                     |        |        |        |        |        |        | D2     | D3     | D2     | D3     |        |        |
| #872     | -11.5 <sup>a</sup>  | -2.7   | -2.1   | -5.0   | -6.1   | -7.6   | -4.9   | -11.7  | -20.8  | -21.8  | -12.1  | -18.0  | -27.7  |
| #873     | -55.1 <sup>a</sup>  | -53.5  | -67.3  | -63.0  | -63.6  | -60.0  | -55.8  | -64.0  | -81.3  | -79.1  | -63.9  | -76.5  | -86.4  |
| #874     | -47.4 <sup>a</sup>  | -42.4  | -45.2  | -48.9  | -49.2  | -50.1  | -39.5  | -49.5  | -62.3  | -62.5  | -49.1  | -58.8  | -68.5  |
| #875     | -44.1 <sup>a</sup>  | -44.7  | -46.0  | -47.4  | -49.8  | -50.8  | -40.0  | -50.7  | -63.1  | -63.4  | -50.6  | -59.7  | -69.6  |
| #876     | -45.4 <sup>a</sup>  | -40.4  | -44.2  | -47.4  | -48.2  | -49.7  | -38.8  | -49.4  | -62.3  | -62.5  | -48.7  | -58.4  | -68.2  |
| #877     | -46.4 <sup>a</sup>  | -45.4  | -46.7  | -49.0  | -48.7  | -50.6  | -40.1  | -50.9  | -63.4  | -63.6  | -50.7  | -60.1  | -69.9  |
| #878     | -43.6 <sup>a</sup>  | -39.0  | -43.9  | -48.6  | -47.2  | -49.1  | -37.9  | -48.9  | -61.9  | -62.1  | -48.3  | -58.0  | -68.0  |
| #879     | -41.0 <sup>a</sup>  | -38.7  | -43.1  | -47.6  | -49.2  | -49.6  | -37.4  | -48.0  | -61.4  | -61.5  | -47.0  | -57.2  | -67.0  |
| #880     | -50.2 <sup>a</sup>  | -46.8  | -47.0  | -49.6  | -51.8  | -52.2  | -41.0  | -51.5  | -63.8  | -64.1  | -51.7  | -60.8  | -70.7  |
| #881     | -49.4 <sup>a</sup>  | -45.5  | -46.7  | -48.9  | -48.0  | -50.2  | -39.6  | -50.5  | -63.0  | -63.2  | -50.3  | -59.7  | -69.5  |
| #882     | -44.0 <sup>a</sup>  | -40.5  | -43.4  | -47.5  | -48.0  | -48.2  | -35.7  | -47.2  | -60.4  | -60.5  | -47.2  | -57.3  | -66.9  |
| #883     | -44.2 <sup>a</sup>  | -40.5  | -43.3  | -47.4  | -47.2  | -47.9  | -35.7  | -47.2  | -60.3  | -60.5  | -47.2  | -57.3  | -66.9  |
| #884     | -44.3 <sup>a</sup>  | -32.0  | -40.6  | -44.8  | -45.8  | -46.8  | -34.7  | -48.5  | -62.0  | -61.9  | -47.1  | -57.6  | -67.1  |
| #885     | -45.8 <sup>a</sup>  | -38.1  | -44.0  | -44.6  | -44.5  | -45.8  | -39.5  | -45.0  | -58.1  | -58.1  | -45.0  | -55.0  | -64.6  |
| #886     | -47.6 <sup>a</sup>  | -26.6  | -38.3  | -39.3  | -44.0  | -45.0  | -32.9  | -47.8  | -61.6  | -61.4  | -45.9  | -56.4  | -66.2  |
| #887     | -45.6 <sup>a</sup>  | -43.3  | -45.5  | -45.1  | -44.2  | -46.2  | -40.1  | -45.8  | -58.5  | -58.6  | -46.6  | -56.0  | -65.7  |
| #888     | -44.5 <sup>a</sup>  | -32.5  | -40.6  | -44.7  | -44.9  | -46.0  | -34.1  | -47.9  | -61.4  | -61.2  | -46.6  | -57.0  | -66.6  |
| #889     | -74.3 <sup>a</sup>  | -65.8  | -85.7  | -76.4  | -80.9  | -75.3  | -67.3  | -76.5  | -95.5  | -92.7  | -75.1  | -89.4  | -99.1  |
| #890     | -71.5 <sup>a</sup>  | -65.0  | -87.9  | -76.0  | -77.9  | -72.7  | -64.9  | -71.9  | -91.3  | -88.4  | -71.1  | -85.9  | -95.6  |
| #891     | -63.9 <sup>a</sup>  | -33.7  | -47.7  | -57.1  | -59.9  | -58.0  | -45.8  | -67.2  | -85.1  | -83.2  | -64.5  | -78.7  | -88.1  |
| #892     | -68.6 <sup>a</sup>  | -60.5  | -73.3  | -72.9  | -74.0  | -70.9  | -63.1  | -72.7  | -90.1  | -88.3  | -73.6  | -87.6  | -96.5  |
| #893     | -65.8 <sup>a</sup>  | -54.0  | -68.3  | -68.4  | -70.1  | -67.0  | -58.2  | -69.2  | -86.6  | -84.7  | -69.8  | -83.8  | -92.8  |
| #894     | -61.9 <sup>a</sup>  | -46.7  | -55.5  | -57.2  | -67.4  | -61.3  | -44.9  | -57.3  | -74.8  | -72.9  | -56.7  | -70.8  | -79.5  |
| #895     | -63.1 <sup>a</sup>  | -63.1  | -82.1  | -73.2  | -73.4  | -74.3  | -70.0  | -66.5  | -84.5  | -83.0  | -70.1  | -85.2  | -93.9  |
| #896     | -94.1 <sup>a</sup>  | -54.4  | -79.9  | -86.2  | -89.7  | -91.6  | -75.5  | -99.3  | -117.8 | -116.2 | -95.0  | -111.0 | -119.5 |
| #897     | -94.5 <sup>a</sup>  | -100.7 | -117.4 | -100.1 | -95.0  | -96.6  | -101.0 | -93.8  | -109.0 | -108.0 | -96.0  | -108.5 | -117.3 |
| #898     | -93.1 <sup>a</sup>  | -89.3  | -105.2 | -90.4  | -89.3  | -89.9  | -92.5  | -87.5  | -102.6 | -101.7 | -86.0  | -98.5  | -107.2 |
| #899     | -45.2 <sup>a</sup>  | -35.3  | -35.5  | -44.4  | -46.5  | -48.1  | -33.4  | -54.3  | -67.7  | -68.0  | -52.6  | -62.4  | -73.2  |
| #900     | -49.0 <sup>a</sup>  | -34.6  | -34.5  | -43.9  | -48.5  | -49.2  | -33.3  | -53.3  | -66.7  | -67.2  | -52.3  | -62.0  | -73.0  |
| #901     | -49.5 <sup>a</sup>  | -34.2  | -44.6  | -51.6  | -53.9  | -54.2  | -37.5  | -56.7  | -71.2  | -71.0  | -54.4  | -65.0  | -75.5  |
| #902     | -50.5 <sup>a</sup>  | -25.5  | -43.9  | -42.0  | -48.6  | -50.7  | -42.3  | -57.6  | -73.7  | -73.4  | -53.4  | -66.1  | -76.6  |
| #903     | -77.0 <sup>a</sup>  | -66.2  | -88.1  | -81.3  | -78.3  | -79.3  | -71.9  | -69.7  | -89.9  | -88.3  | -73.2  | -90.7  | -100.0 |
| #904     | -100.7 <sup>a</sup> | -60.2  | -87.6  | -92.4  | -98.3  | -98.1  | -79.9  | -104.0 | -124.3 | -122.4 | -100.3 | -117.9 | -127.2 |
| #905     | -92.6 <sup>a</sup>  | -88.0  | -102.3 | -94.1  | -91.2  | -94.5  | -94.7  | -94.6  | -110.8 | -110.0 | -96.9  | -109.6 | -119.5 |
| #906     | -91.1 <sup>a</sup>  | -94.3  | -113.5 | -96.1  | -92.2  | -92.6  | -94.1  | -90.3  | -106.8 | -105.8 | -89.3  | -103.0 | -112.5 |
| #907     | 11.3 <sup>a</sup>   | 14.4   | 36.3   | 25.5   | 22.1   | 23.0   | 26.4   | 17.2   | 7.0    | 5.7    | 17.5   | 12.0   | -0.2   |
| #908     | 5.1 <sup>a</sup>    | -1.7   | 3.5    | 3.0    | 1.5    | 0.4    | 4.2    | -1.5   | -12.7  | -14.1  | -2.0   | -8.8   | -21.2  |
| #909     | 4.0 <sup>a</sup>    | -0.6   | 5.7    | 5.6    | 4.1    | 1.9    | 5.2    | -0.2   | -11.6  | -13.0  | -0.4   | -7.4   | -19.9  |
| #910     | 0.0 <sup>a</sup>    | -2.0   | 3.3    | 2.9    | 2.0    | 0.5    | 4.3    | -1.3   | -12.5  | -13.8  | -1.8   | -8.6   | -21.0  |
| #911     | -38.4 <sup>a</sup>  | -31.8  | -38.0  | -41.6  | -42.7  | -45.0  | -37.9  | -51.6  | -67.3  | -67.5  | -50.0  | -61.8  | -73.4  |
| #912     | -60.7 <sup>a</sup>  | -44.6  | -53.4  | -55.8  | -58.0  | -59.7  | -45.6  | -60.3  | -77.5  | -77.3  | -58.3  | -71.7  | -83.4  |
| #913     | 11.9 <sup>a</sup>   | 16.1   | 20.4   | 17.3   | 18.6   | 15.3   | 11.8   | 3.0    | -9.1   | -10.6  | 4.4    | -3.1   | -16.4  |
| #914     | 5.6 <sup>a</sup>    | 11.4   | 14.9   | 11.4   | 9.3    | 9.8    | 13.6   | -1.2   | -14.9  | -16.1  | 0.0    | -8.1   | -22.8  |
| #915     | -87.9 <sup>a</sup>  | -45.0  | -96.6  | -83.2  | -90.6  | -84.8  | -65.0  | -89.9  | -132.5 | -127.0 | -84.1  | -117.5 | -137.8 |
| #1051    | -106.6 <sup>a</sup> | -101.6 | -109.4 | -110.9 | -115.2 | -112.9 | -102.4 | -111.8 | -112.2 | -112.4 | -118.7 | -118.8 | -119.8 |

. . . continued on next page . . .

Table S24: . . . continued from previous page . . .

| Molecule | Ref.                | MNDO   | AMI1   | PM3    | PM6    | PM7    | OM1    | OM2    |        | OM3    |        | D3T    |
|----------|---------------------|--------|--------|--------|--------|--------|--------|--------|--------|--------|--------|--------|
|          |                     |        |        |        |        |        |        | D2     | D3     | D2     | D3     |        |
| #1056    | -122.5 <sup>a</sup> | -110.0 | -115.4 | -119.6 | -130.2 | -126.7 | -106.3 | -123.4 | -123.6 | -127.6 | -128.5 | -130.5 |
| #1057    | -103.3 <sup>a</sup> | -101.1 | -103.0 | -102.0 | -101.3 | -102.2 | -101.3 | -101.0 | -103.0 | -102.7 | -103.8 | -106.0 |
| #1058    | -103.3 <sup>a</sup> | -101.1 | -103.0 | -102.0 | -101.3 | -102.2 | -101.3 | -101.0 | -103.0 | -102.7 | -103.8 | -106.0 |
| #1061    | -30.1 <sup>a</sup>  | -28.3  | -27.0  | -34.1  | -23.6  | -27.9  | -28.6  | -37.3  | -39.9  | -30.7  | -32.6  | -34.6  |
| #1062    | -93.9 <sup>a</sup>  | -106.0 | -111.5 | -98.6  | -96.1  | -95.5  | -99.4  | -91.7  | -94.6  | -93.6  | -95.8  | -98.1  |
| #1067    | -64.8 <sup>a</sup>  | -70.9  | -66.9  | -74.0  | -62.4  | -67.7  | -73.2  | -74.0  | -76.8  | -77.0  | -78.6  | -81.4  |
| #1068    | -79.0 <sup>a</sup>  | -76.1  | -76.7  | -75.3  | -74.3  | -75.7  | -75.9  | -74.4  | -77.2  | -74.8  | -76.3  | -79.2  |
| #1069    | -67.6 <sup>a</sup>  | -68.9  | -54.2  | -62.2  | -66.0  | -60.8  | -56.9  | -54.2  | -56.9  | -54.0  | -55.6  | -58.3  |
| #1070    | -72.1 <sup>a</sup>  | -93.0  | -93.8  | -82.5  | -83.0  | -78.5  | -76.0  | -78.5  | -82.0  | -70.8  | -73.1  | -76.2  |
| #1071    | -95.2 <sup>a</sup>  | -90.1  | -97.0  | -92.4  | -92.6  | -92.1  | -91.5  | -89.8  | -93.3  | -87.7  | -90.2  | -93.2  |
| #1072    | -97.9 <sup>a</sup>  | -93.7  | -96.4  | -94.1  | -97.5  | -96.8  | -93.1  | -95.7  | -99.0  | -93.8  | -96.0  | -99.0  |
| #1073    | -108.4 <sup>a</sup> | -106.3 | -109.0 | -106.3 | -105.2 | -106.7 | -107.0 | -106.3 | -109.8 | -107.5 | -109.8 | -113.0 |
| #1074    | -97.6 <sup>a</sup>  | -110.2 | -114.1 | -100.4 | -102.3 | -97.9  | -104.1 | -97.5  | -101.7 | -98.1  | -101.5 | -104.5 |
| #1075    | -90.1 <sup>a</sup>  | -99.7  | -103.5 | -91.2  | -92.6  | -91.6  | -92.2  | -89.2  | -93.1  | -86.3  | -89.5  | -92.4  |
| #1076    | -83.2 <sup>a</sup>  | -94.4  | -103.3 | -90.2  | -91.7  | -87.5  | -83.0  | -85.6  | -89.8  | -78.3  | -81.7  | -84.5  |
| #1077    | -102.7 <sup>a</sup> | -107.6 | -114.1 | -103.7 | -105.7 | -104.4 | -102.6 | -101.4 | -105.9 | -102.1 | -105.9 | -108.9 |
| #1078    | -88.1 <sup>a</sup>  | -86.1  | -87.3  | -86.2  | -86.3  | -87.0  | -84.8  | -84.7  | -88.8  | -85.6  | -87.9  | -91.9  |
| #1079    | -78.2 <sup>a</sup>  | -78.8  | -83.3  | -83.4  | -82.8  | -84.5  | -80.6  | -83.7  | -88.0  | -83.5  | -86.2  | -90.2  |
| #1080    | -87.0 <sup>a</sup>  | -93.9  | -91.4  | -83.4  | -79.0  | -82.9  | -82.8  | -89.2  | -93.1  | -91.6  | -94.3  | -98.2  |
| #1081    | -79.6 <sup>a</sup>  | -68.7  | -70.0  | -67.4  | -70.5  | -70.4  | -67.6  | -69.2  | -72.6  | -66.0  | -68.5  | -72.2  |
| #1082    | -67.1 <sup>a</sup>  | -70.9  | -67.0  | -68.1  | -67.3  | -63.9  | -54.2  | -59.4  | -61.8  | -51.3  | -55.0  | -58.7  |
| #1083    | -80.9 <sup>a</sup>  | -94.3  | -101.9 | -87.8  | -91.4  | -86.6  | -80.9  | -82.9  | -88.3  | -75.9  | -80.0  | -84.1  |
| #1084    | -75.5 <sup>a</sup>  | -89.2  | -95.0  | -83.1  | -85.6  | -82.1  | -75.1  | -76.5  | -82.1  | -72.4  | -76.4  | -80.5  |
| #1085    | -106.5 <sup>a</sup> | -98.9  | -102.2 | -98.9  | -105.7 | -104.5 | -102.3 | -103.9 | -108.6 | -102.1 | -105.3 | -109.2 |
| #1087    | -81.9 <sup>a</sup>  | -93.3  | -99.4  | -87.1  | -87.2  | -84.9  | -85.1  | -85.5  | -90.8  | -79.5  | -83.8  | -87.4  |
| #1088    | -46.1 <sup>a</sup>  | -115.2 | -121.5 | -106.1 | -103.8 | -103.9 | -109.9 | -102.7 | -108.6 | -103.6 | -108.3 | -112.2 |
| #1089    | -93.1 <sup>a</sup>  | -95.1  | -103.1 | -94.0  | -96.1  | -92.9  | -89.8  | -95.1  | -100.9 | -44.4  | -49.1  | -53.0  |
| #1090    | -91.9 <sup>a</sup>  | -84.3  | -85.6  | -91.6  | -95.0  | -96.0  | -91.0  | -99.2  | -105.0 | -86.5  | -91.6  | -95.2  |
| #1091    | -111.5 <sup>a</sup> | -103.4 | -108.2 | -103.1 | -109.5 | -108.9 | -108.1 | -109.1 | -115.2 | -101.8 | -106.2 | -111.0 |
| #1092    | -115.1 <sup>a</sup> | -100.5 | -106.3 | -104.3 | -113.9 | -113.2 | -108.1 | -113.7 | -120.2 | -111.3 | -116.3 | -121.2 |
| #1093    | -105.6 <sup>a</sup> | -119.8 | -128.2 | -111.4 | -108.6 | -108.8 | -114.8 | -107.2 | -114.3 | -108.3 | -114.4 | -119.1 |
| #1094    | -65.7 <sup>a</sup>  | -72.7  | -62.8  | -63.2  | -58.3  | -60.5  | -58.8  | -56.6  | -62.8  | -60.3  | -63.4  | -69.9  |
| #1098    | -66.2 <sup>a</sup>  | -73.9  | -65.7  | -66.0  | -63.7  | -65.2  | -62.1  | -60.6  | -66.7  | -64.5  | -67.6  | -74.0  |
| #1099    | -68.0 <sup>a</sup>  | -74.9  | -66.8  | -67.3  | -68.3  | -68.4  | -64.1  | -62.6  | -68.0  | -66.1  | -69.2  | -75.7  |
| #1100    | -80.2 <sup>a</sup>  | -83.6  | -86.5  | -87.6  | -90.4  | -89.9  | -86.0  | -90.8  | -98.1  | -93.5  | -99.5  | -105.6 |
| #1101    | -79.5 <sup>a</sup>  | -84.5  | -86.6  | -87.9  | -88.8  | -89.0  | -86.1  | -90.4  | -97.8  | -94.4  | -98.7  | -104.8 |
| #1102    | -105.1 <sup>a</sup> | -88.9  | -91.7  | -95.8  | -98.2  | -100.2 | -96.6  | -104.4 | -112.3 | -106.1 | -112.5 | -118.1 |
| #1103    | -94.7 <sup>a</sup>  | -94.3  | -98.8  | -100.0 | -95.3  | -94.2  | -91.9  | -91.6  | -100.8 | -89.5  | -96.4  | -102.4 |
| #1104    | -102.5 <sup>a</sup> | -84.3  | -89.1  | -95.0  | -98.1  | -100.4 | -95.0  | -106.1 | -114.1 | -107.2 | -113.5 | -119.2 |
| #1105    | -89.8 <sup>a</sup>  | -84.0  | -86.3  | -83.0  | -90.3  | -89.2  | -85.8  | -87.6  | -93.8  | -84.9  | -89.4  | -95.1  |
| #1106    | -72.4 <sup>a</sup>  | -79.7  | -85.5  | -77.8  | -79.8  | -77.1  | -71.8  | -76.2  | -84.0  | -67.9  | -73.7  | -79.1  |
| #1107    | -116.2 <sup>a</sup> | -96.3  | -109.5 | -109.7 | -117.8 | -118.4 | -107.5 | -120.3 | -129.8 | -119.9 | -127.6 | -133.4 |
| #1108    | -100.7 <sup>a</sup> | -93.6  | -109.9 | -99.1  | -103.9 | -99.1  | -86.9  | -98.2  | -108.6 | -88.6  | -97.1  | -102.7 |

. . . continued on next page . . .



Table S24: . . . continued from previous page . . .

| Molecule | Ref.                | MNDO   | AMI1   | PM3    | PM6    | PM7    | OM1    | OM2    |        | OM3    |        | D3T    |        |
|----------|---------------------|--------|--------|--------|--------|--------|--------|--------|--------|--------|--------|--------|--------|
|          |                     |        |        |        |        |        |        | D2     | D3     | D2     | D3     |        |        |
| #1155    | -78.4 <sup>a</sup>  | -75.3  | -75.6  | -75.5  | -74.5  | -75.8  | -74.1  | -80.4  | -88.1  | -89.0  | -79.9  | -84.8  | -93.1  |
| #1156    | -66.8 <sup>a</sup>  | -60.3  | -61.2  | -58.1  | -60.7  | -60.7  | -60.7  | -65.7  | -73.1  | -74.0  | -62.1  | -66.7  | -74.9  |
| #1157    | -76.6 <sup>a</sup>  | -73.3  | -73.6  | -73.7  | -74.4  | -75.1  | -72.1  | -79.6  | -87.8  | -88.5  | -78.6  | -83.8  | -92.3  |
| #1158    | -79.0 <sup>a</sup>  | -75.4  | -75.8  | -75.8  | -75.8  | -76.5  | -74.3  | -80.8  | -88.6  | -89.4  | -80.4  | -85.3  | -93.6  |
| #1159    | -49.1 <sup>a</sup>  | -61.8  | -62.8  | -53.7  | -58.8  | -55.7  | -52.7  | -60.2  | -70.1  | -70.7  | -51.0  | -57.4  | -66.9  |
| #1160    | -82.7 <sup>a</sup>  | -77.4  | -80.4  | -82.3  | -82.7  | -84.0  | -75.8  | -88.9  | -98.5  | -99.8  | -86.4  | -93.4  | -102.8 |
| #1161    | -84.8 <sup>a</sup>  | -80.9  | -82.1  | -83.1  | -86.5  | -86.4  | -78.3  | -90.1  | -99.9  | -100.6 | -88.8  | -95.4  | -104.8 |
| #1162    | -83.9 <sup>a</sup>  | -81.0  | -81.9  | -83.0  | -84.5  | -85.3  | -77.9  | -89.5  | -99.3  | -100.0 | -88.1  | -94.8  | -104.2 |
| #1163    | -81.6 <sup>a</sup>  | -78.1  | -79.2  | -81.6  | -84.6  | -84.7  | -76.3  | -88.1  | -98.4  | -99.0  | -86.4  | -93.5  | -102.9 |
| #1164    | -81.4 <sup>a</sup>  | -77.4  | -78.2  | -78.1  | -77.9  | -79.4  | -76.3  | -83.8  | -94.1  | -94.7  | -82.3  | -89.4  | -98.8  |
| #1165    | -86.6 <sup>a</sup>  | -80.5  | -82.8  | -84.4  | -84.0  | -85.3  | -78.4  | -90.0  | -99.9  | -100.5 | -88.7  | -95.5  | -104.7 |
| #1166    | -87.1 <sup>a</sup>  | -82.9  | -83.1  | -84.9  | -84.5  | -85.6  | -79.1  | -89.7  | -99.1  | -99.9  | -88.8  | -95.1  | -104.4 |
| #1167    | -80.1               | -80.1  | -81.4  | -80.2  | -78.7  | -80.6  | -79.1  | -85.1  | -94.8  | -95.5  | -84.5  | -91.0  | -100.3 |
| #1168    | -85.0 <sup>a</sup>  | -80.2  | -81.6  | -80.3  | -79.7  | -81.2  | -79.4  | -85.6  | -95.2  | -95.9  | -85.0  | -91.4  | -100.7 |
| #1169    | -74.7 <sup>a</sup>  | -68.0  | -69.0  | -67.6  | -71.6  | -71.0  | -66.0  | -75.3  | -84.4  | -85.2  | -71.4  | -77.4  | -86.6  |
| #1170    | -47.9 <sup>a</sup>  | -54.6  | -46.6  | -47.5  | -45.0  | -46.1  | -40.0  | -44.9  | -54.7  | -55.7  | -47.0  | -52.9  | -63.7  |
| #1171    | -50.5 <sup>a</sup>  | -56.4  | -47.6  | -48.6  | -52.1  | -51.5  | -41.8  | -47.4  | -57.1  | -58.2  | -49.3  | -55.0  | -65.8  |
| #1172    | -47.1 <sup>a</sup>  | -53.8  | -45.7  | -45.8  | -46.7  | -48.1  | -40.2  | -45.7  | -55.4  | -56.5  | -47.7  | -53.4  | -64.3  |
| #1173    | -46.1 <sup>a</sup>  | -55.7  | -44.6  | -46.3  | -43.3  | -44.3  | -36.5  | -41.4  | -51.1  | -52.2  | -43.7  | -49.4  | -60.2  |
| #1174    | -58.3 <sup>a</sup>  | -51.8  | -50.7  | -56.0  | -57.9  | -59.9  | -58.0  | -69.4  | -80.1  | -80.9  | -69.0  | -75.9  | -86.1  |
| #1175    | -90.2 <sup>a</sup>  | -80.9  | -86.0  | -90.5  | -91.2  | -91.8  | -78.1  | -95.8  | -108.2 | -108.6 | -93.2  | -102.1 | -112.5 |
| #1176    | -91.3 <sup>a</sup>  | -85.0  | -88.0  | -91.4  | -92.4  | -93.5  | -80.7  | -98.0  | -109.3 | -110.5 | -95.1  | -103.6 | -114.0 |
| #1177    | -88.7 <sup>a</sup>  | -82.1  | -85.8  | -89.9  | -92.0  | -92.7  | -79.3  | -96.3  | -108.7 | -109.2 | -93.8  | -102.5 | -113.1 |
| #1178    | -92.3 <sup>a</sup>  | -86.1  | -89.1  | -91.7  | -94.3  | -94.9  | -82.2  | -99.0  | -111.1 | -111.5 | -96.9  | -105.5 | -115.8 |
| #1179    | -89.4 <sup>a</sup>  | -85.6  | -87.1  | -91.1  | -95.9  | -95.1  | -81.4  | -97.8  | -109.8 | -110.3 | -95.6  | -104.2 | -114.5 |
| #1180    | -85.8 <sup>a</sup>  | -77.5  | -82.5  | -82.6  | -83.4  | -84.7  | -79.1  | -90.5  | -102.9 | -103.4 | -87.7  | -96.8  | -107.1 |
| #1181    | -62.6 <sup>a</sup>  | -62.1  | -63.6  | -58.8  | -67.7  | -65.6  | -60.0  | -73.3  | -85.4  | -85.9  | -63.2  | -71.6  | -82.0  |
| #1182    | -93.2 <sup>a</sup>  | -84.1  | -89.1  | -92.7  | -91.7  | -93.4  | -81.3  | -97.8  | -109.9 | -110.3 | -95.8  | -104.5 | -114.6 |
| #1183    | -89.8 <sup>a</sup>  | -80.7  | -85.4  | -84.9  | -84.1  | -86.1  | -81.8  | -91.6  | -103.5 | -104.0 | -90.2  | -98.7  | -108.8 |
| #1184    | -91.5 <sup>a</sup>  | -80.8  | -85.5  | -85.1  | -84.8  | -86.5  | -82.1  | -91.8  | -103.8 | -104.2 | -90.5  | -99.0  | -109.1 |
| #1185    | -90.6 <sup>a</sup>  | -89.6  | -89.3  | -91.2  | -90.1  | -92.0  | -80.1  | -89.9  | -103.2 | -103.4 | -91.4  | -101.3 | -111.7 |
| #1186    | -130.4 <sup>a</sup> | -119.8 | -133.4 | -121.1 | -129.5 | -128.0 | -126.2 | -126.3 | -141.7 | -140.8 | -124.1 | -136.0 | -145.6 |
| #1187    | -136.2 <sup>a</sup> | -126.8 | -142.5 | -130.2 | -134.7 | -134.5 | -134.1 | -132.2 | -146.3 | -146.0 | -130.9 | -142.3 | -151.5 |
| #1188    | -125.0 <sup>a</sup> | -143.4 | -162.6 | -138.6 | -133.9 | -134.4 | -140.7 | -130.1 | -145.9 | -144.8 | -132.6 | -145.6 | -154.7 |
| #1189    | -53.3 <sup>a</sup>  | -48.3  | -47.2  | -45.5  | -47.8  | -47.9  | -44.2  | -55.2  | -65.8  | -67.0  | -52.8  | -59.0  | -71.0  |
| #1190    | -55.6 <sup>a</sup>  | -50.5  | -49.3  | -48.9  | -48.7  | -49.3  | -46.1  | -55.1  | -65.4  | -66.7  | -53.9  | -60.0  | -71.7  |
| #1191    | -95.3 <sup>a</sup>  | -84.3  | -92.5  | -99.0  | -99.6  | -100.2 | -80.8  | -105.0 | -119.5 | -119.7 | -101.1 | -111.7 | -123.2 |
| #1192    | -95.2 <sup>a</sup>  | -85.4  | -92.2  | -98.4  | -101.3 | -101.3 | -82.2  | -104.3 | -118.9 | -119.1 | -101.2 | -112.0 | -123.3 |
| #1193    | -95.6 <sup>a</sup>  | -85.8  | -92.5  | -98.7  | -99.5  | -100.8 | -82.4  | -104.5 | -119.1 | -119.3 | -101.3 | -112.1 | -123.4 |
| #1194    | -95.2 <sup>a</sup>  | -73.5  | -86.7  | -89.6  | -89.7  | -91.3  | -80.8  | -98.2  | -113.0 | -112.9 | -94.8  | -106.1 | -116.9 |
| #1195    | -123.6 <sup>a</sup> | -111.7 | -137.5 | -122.5 | -128.4 | -127.6 | -118.5 | -115.8 | -136.5 | -135.0 | -115.5 | -133.1 | -142.9 |
| #1196    | -141.1 <sup>a</sup> | -131.5 | -149.3 | -135.6 | -139.7 | -139.6 | -139.2 | -136.8 | -152.1 | -152.1 | -135.7 | -148.5 | -158.5 |
| #1197    | -132.1 <sup>a</sup> | -128.7 | -148.4 | -130.6 | -135.4 | -134.2 | -134.0 | -152.3 | -151.5 | -151.5 | -126.4 | -140.8 | -150.6 |
| #1198    | -74.4 <sup>a</sup>  | -61.8  | -75.6  | -67.7  | -75.6  | -73.2  | -63.1  | -78.1  | -94.9  | -94.5  | -66.8  | -79.5  | -91.2  |
| #1199    | -101.1 <sup>a</sup> | -83.1  | -96.4  | -105.0 | -106.3 | -106.9 | -81.3  | -109.8 | -126.8 | -126.9 | -105.6 | -118.6 | -130.9 |

. . . continued on next page . . .







Table S24: . . . continued from previous page . . . .

| Molecule | Ref.                | MNDO   | AMI    | PM3    | PM6    | PM7    | OM1    | OM2    |        | OM3    |        | D3T    | D3     | OM3    | D3     | D3T    |
|----------|---------------------|--------|--------|--------|--------|--------|--------|--------|--------|--------|--------|--------|--------|--------|--------|--------|
|          |                     |        |        |        |        |        |        | D2     | D3     | D2     | D3     |        |        |        |        |        |
| #1626    | -201.6 <sup>a</sup> | -206.5 | -198.3 | -196.9 | -206.0 | -205.6 | -198.8 | -200.9 | -208.2 | -207.7 | -207.7 | -200.6 | -205.3 | -211.3 | -211.3 | -211.3 |
| #921     | -24.3 <sup>a</sup>  | -10.8  | -15.2  | -15.3  | -21.0  | -23.4  | -18.8  | -7.2   | -7.6   | -7.9   | -7.9   | -19.5  | -19.7  | -20.7  | -20.7  | -20.7  |
| #924     | -44.5 <sup>a</sup>  | -40.2  | -44.8  | -41.8  | -40.6  | -44.1  | -41.2  | -39.8  | -40.7  | -41.1  | -41.1  | -46.3  | -46.9  | -48.4  | -48.4  | -48.4  |
| #1358    | -131.4 <sup>a</sup> | -135.9 | -129.9 | -142.0 | -141.0 | -136.2 | -128.5 | -126.2 | -143.9 | -143.8 | -143.7 | -124.4 | -138.2 | -150.8 | -149.8 | -149.8 |
| #1360    | -160.6 <sup>a</sup> | -140.0 | -164.1 | -162.0 | -169.0 | -169.5 | -153.0 | -163.6 | -183.3 | -182.8 | -182.8 | -167.4 | -184.0 | -195.2 | -195.2 | -195.2 |
| #1362    | -176.5 <sup>a</sup> | -144.7 | -175.7 | -171.8 | -178.2 | -179.0 | -161.1 | -171.8 | -196.0 | -195.0 | -194.8 | -175.4 | -196.0 | -208.7 | -208.6 | -208.6 |
| #1456    | -3.2 <sup>a</sup>   | 58.7   | 25.0   | -4.7   | 9.3    | 7.8    | 25.6   | 6.1    | 1.8    | 1.1    | 1.1    | 9.0    | 5.8    | 1.5    | 1.6    | 1.6    |
| #1473    | -92.5 <sup>a</sup>  | 1.5    | -96.0  | -97.7  | -131.7 | -109.6 | -76.3  | -117.4 | -134.3 | -134.4 | -134.2 | -96.9  | -110.5 | -121.8 | -121.6 | -121.6 |
| #925     | -5.4 <sup>a</sup>   | -18.2  | -8.4   | -2.9   | -7.4   | -11.9  | -13.5  | -2.7   | -4.6   | -5.1   | -5.1   | -8.4   | -9.7   | -12.2  | -12.2  | -12.2  |
| #926     | -57.0 <sup>a</sup>  | -48.2  | -50.7  | -51.0  | -55.1  | -56.6  | -47.7  | -50.7  | -52.8  | -53.2  | -53.2  | -57.4  | -58.9  | -61.4  | -61.4  | -61.4  |
| #927     | 19.6 <sup>a</sup>   | 19.2   | 42.9   | 35.1   | 23.3   | 22.7   | 28.4   | 23.9   | 22.0   | 21.3   | 21.3   | 24.2   | 23.4   | 20.0   | 20.0   | 20.0   |
| #928     | -3.7 <sup>a</sup>   | -8.2   | 12.5   | -1.5   | -1.7   | 0.4    | 8.0    | 2.8    | 1.0    | 0.3    | 0.3    | 5.2    | 4.3    | 1.1    | 1.1    | 1.1    |
| #929     | -31.1 <sup>a</sup>  | -24.4  | -24.6  | -24.8  | -28.1  | -30.2  | -22.7  | -24.4  | -27.1  | -27.6  | -27.6  | -29.9  | -31.7  | -35.0  | -35.0  | -35.0  |
| #930     | -8.5 <sup>a</sup>   | -15.6  | -17.2  | -8.1   | -8.8   | -9.8   | -12.6  | -10.7  | -13.4  | -13.7  | -13.7  | -10.0  | -12.0  | -14.7  | -14.7  | -14.7  |
| #931     | -45.8 <sup>a</sup>  | -37.4  | -36.9  | -44.6  | -40.9  | -43.9  | -43.2  | -43.5  | -47.3  | -47.6  | -47.6  | -41.4  | -44.5  | -47.8  | -47.7  | -47.7  |
| #932     | -59.3 <sup>a</sup>  | -46.9  | -47.1  | -51.7  | -54.5  | -55.4  | -49.3  | -50.6  | -54.4  | -54.7  | -54.7  | -53.2  | -56.3  | -59.6  | -59.6  | -59.6  |
| #933     | -61.9 <sup>a</sup>  | -53.4  | -56.4  | -55.7  | -58.8  | -60.4  | -53.4  | -55.3  | -59.1  | -59.3  | -59.3  | -61.7  | -64.5  | -68.0  | -68.0  | -68.0  |
| #934     | -48.6 <sup>a</sup>  | -50.1  | -49.9  | -53.8  | -50.8  | -52.1  | -46.3  | -47.0  | -52.1  | -52.1  | -52.1  | -41.3  | -45.6  | -48.8  | -48.8  | -48.8  |
| #935     | 8.5 <sup>a</sup>    | 7.5    | 35.0   | 25.7   | 13.1   | 13.2   | 21.6   | 16.4   | 13.2   | 12.4   | 12.4   | 16.1   | 14.3   | 9.9    | 9.9    | 9.9    |
| #936     | 8.1 <sup>a</sup>    | 8.2    | 35.3   | 26.1   | 12.3   | 11.3   | 19.1   | 12.6   | 9.5    | 8.7    | 8.7    | 13.0   | 11.1   | 6.8    | 6.8    | 6.8    |
| #937     | -47.2 <sup>a</sup>  | -51.9  | -44.4  | -50.2  | -51.2  | -49.7  | -45.5  | -42.5  | -47.3  | -47.6  | -47.6  | -46.9  | -50.1  | -54.8  | -54.7  | -54.7  |
| #938     | -31.2 <sup>a</sup>  | -39.6  | -22.9  | -32.1  | -32.8  | -32.2  | -23.9  | -25.6  | -29.7  | -30.2  | -30.2  | -23.9  | -26.7  | -31.1  | -31.1  | -31.1  |
| #939     | -37.7 <sup>a</sup>  | -32.0  | -31.9  | -33.6  | -37.8  | -39.6  | -27.6  | -32.8  | -38.0  | -38.4  | -38.4  | -38.7  | -42.0  | -46.3  | -46.3  | -46.3  |
| #940     | -67.5 <sup>a</sup>  | -55.1  | -60.9  | -60.2  | -63.5  | -65.9  | -57.4  | -62.8  | -68.7  | -68.7  | -68.7  | -68.3  | -73.0  | -77.3  | -77.3  | -77.3  |
| #941     | -66.7 <sup>a</sup>  | -58.1  | -63.4  | -61.1  | -63.7  | -65.9  | -58.5  | -60.1  | -65.5  | -65.7  | -65.7  | -66.7  | -70.8  | -75.2  | -75.2  | -75.2  |
| #942     | -67.5 <sup>a</sup>  | -55.1  | -60.9  | -60.2  | -63.5  | -65.9  | -57.4  | -62.8  | -68.7  | -68.7  | -68.7  | -68.3  | -73.0  | -77.3  | -77.3  | -77.3  |
| #944     | -29.1 <sup>a</sup>  | -28.2  | -25.6  | -27.7  | -32.4  | -35.1  | -32.5  | -24.5  | -30.9  | -30.9  | -30.9  | -23.1  | -28.4  | -32.8  | -32.8  | -32.8  |
| #945     | -19.0 <sup>a</sup>  | -25.0  | -11.8  | -18.1  | -14.8  | -17.1  | -14.8  | -11.5  | -15.6  | -16.5  | -16.5  | -14.9  | -17.1  | -22.8  | -22.8  | -22.8  |
| #946     | -10.4 <sup>a</sup>  | -18.6  | -11.6  | -14.0  | -8.5   | -10.8  | -6.1   | -9.0   | -13.2  | -14.1  | -14.1  | -11.8  | -14.1  | -19.8  | -19.8  | -19.8  |
| #947     | -7.2 <sup>a</sup>   | -20.0  | -12.7  | -15.2  | -12.2  | -14.0  | -7.8   | -9.9   | -14.1  | -15.0  | -15.0  | -12.5  | -14.8  | -20.5  | -20.5  | -20.5  |
| #948     | 21.0 <sup>a</sup>   | 44.5   | 39.6   | 27.3   | 24.1   | 24.0   | 38.8   | 25.6   | 21.3   | 20.5   | 20.5   | 26.8   | 24.4   | 18.7   | 18.7   | 18.7   |
| #949     | -4.3 <sup>a</sup>   | -3.5   | 27.4   | 16.7   | 2.1    | 1.8    | 12.3   | 5.2    | 0.7    | -0.2   | -0.2   | 5.0    | 2.1    | -3.3   | -3.3   | -3.3   |
| #950     | -50.4 <sup>a</sup>  | -51.2  | -40.3  | -51.9  | -51.1  | -50.1  | -47.0  | -46.2  | -52.6  | -52.9  | -52.8  | -45.8  | -50.5  | -56.0  | -56.0  | -56.0  |
| #951     | -35.6 <sup>a</sup>  | -44.0  | -29.1  | -36.1  | -36.9  | -36.8  | -29.4  | -30.6  | -36.4  | -36.8  | -36.8  | -28.6  | -32.7  | -38.1  | -38.1  | -38.1  |
| #952     | -24.9 <sup>a</sup>  | -14.5  | -16.6  | -25.5  | -18.8  | -21.3  | -18.4  | -20.0  | -25.9  | -26.3  | -26.3  | -17.2  | -22.0  | -26.8  | -26.8  | -26.8  |
| #953     | -43.0 <sup>a</sup>  | -37.2  | -37.8  | -49.9  | -46.3  | -47.5  | -41.2  | -48.7  | -56.2  | -56.3  | -56.3  | -42.6  | -48.9  | -54.0  | -53.9  | -53.9  |
| #954     | -74.8 <sup>a</sup>  | -50.0  | -63.8  | -64.8  | -69.5  | -71.5  | -58.3  | -70.8  | -79.3  | -78.9  | -78.9  | -74.5  | -81.6  | -86.7  | -86.6  | -86.6  |
| #955     | -59.8 <sup>a</sup>  | -45.5  | -47.0  | -55.8  | -56.5  | -59.2  | -53.6  | -57.8  | -65.1  | -65.2  | -65.2  | -55.0  | -60.8  | -66.1  | -66.1  | -66.1  |
| #956     | -28.8 <sup>a</sup>  | -33.9  | -17.9  | -27.2  | -26.2  | -27.4  | -20.8  | -19.6  | -25.2  | -26.2  | -26.2  | -23.5  | -26.9  | -33.7  | -33.7  | -33.7  |
| #957     | -20.2 <sup>a</sup>  | -26.0  | -17.6  | -23.4  | -17.8  | -20.1  | -11.3  | -16.9  | -22.8  | -23.7  | -23.6  | -20.0  | -23.8  | -30.5  | -30.5  | -30.5  |
| #958     | -20.2 <sup>a</sup>  | -26.6  | -17.2  | -22.0  | -17.7  | -20.0  | -11.6  | -16.6  | -22.4  | -23.3  | -23.3  | -19.9  | -23.5  | -30.3  | -30.3  | -30.3  |
| #959     | -16.7 <sup>a</sup>  | -27.7  | -17.8  | -23.3  | -18.4  | -20.0  | -11.8  | -16.7  | -22.4  | -23.3  | -23.3  | -20.2  | -23.7  | -30.5  | -30.4  | -30.4  |
| #960     | -17.1 <sup>a</sup>  | -28.8  | -19.1  | -24.4  | -23.6  | -24.3  | -13.7  | -18.1  | -23.8  | -24.7  | -24.7  | -21.2  | -24.7  | -31.4  | -31.4  | -31.4  |
| #961     | -28.8 <sup>a</sup>  | -23.0  | -18.4  | -25.8  | -34.2  | -31.7  | -15.7  | -19.8  | -25.7  | -26.5  | -26.5  | -25.3  | -29.0  | -35.7  | -35.7  | -35.7  |
| #962     | -23.6 <sup>a</sup>  | -26.4  | -24.1  | -24.1  | -26.1  | -25.5  | -15.2  | -16.0  | -21.9  | -22.7  | -22.7  | -20.6  | -24.1  | -31.0  | -31.0  | -31.0  |

. . . continued on next page . . .

Table S24: . . . continued from previous page . . .

| Molecule | Ref.               | MNDO  | AMI   | PM3   | PM6   | PM7   | OM1   | OM2   |        | OM3    |       | OM3   |        | D3T |
|----------|--------------------|-------|-------|-------|-------|-------|-------|-------|--------|--------|-------|-------|--------|-----|
|          |                    |       |       |       |       |       |       | D2    | D3     | D2     | D3    | D2    | D3     |     |
| #963     | -25.0 <sup>a</sup> | -26.1 | -22.9 | -21.6 | -20.6 | -20.4 | -15.7 | -14.6 | -20.5  | -21.5  | -19.6 | -23.0 | -30.2  |     |
| #964     | -21.6 <sup>a</sup> | -25.8 | -22.9 | -23.3 | -21.4 | -21.6 | -13.7 | -13.9 | -19.8  | -20.6  | -18.6 | -22.1 | -29.0  |     |
| #965     | -4.8 <sup>a</sup>  | -13.2 | 19.5  | 7.4   | -5.6  | -6.6  | 7.0   | -3.4  | -9.9   | -10.6  | -3.1  | -7.7  | -14.1  |     |
| #966     | -57.3 <sup>a</sup> | -52.8 | -58.1 | -55.3 | -60.2 | -58.3 | -51.0 | -47.5 | -57.4  | -56.9  | -52.1 | -59.7 | -66.1  |     |
| #967     | -17.9 <sup>a</sup> | -35.2 | -29.2 | -18.1 | -25.0 | -26.5 | -23.5 | -13.3 | -22.4  | -22.2  | -19.8 | -26.4 | -33.0  |     |
| #968     | -68.6 <sup>a</sup> | -49.0 | -52.8 | -64.7 | -68.0 | -68.5 | -57.5 | -61.8 | -71.7  | -71.5  | -61.2 | -69.7 | -75.5  |     |
| #969     | -64.7 <sup>a</sup> | -50.4 | -54.0 | -61.3 | -62.0 | -64.6 | -58.9 | -62.7 | -71.6  | -71.5  | -60.0 | -67.2 | -73.3  |     |
| #970     | 10.8 <sup>a</sup>  | 5.3   | 31.3  | 15.9  | 16.5  | 18.0  | 23.5  | 17.1  | 11.5   | 10.5   | 18.4  | 15.5  | 8.1    |     |
| #971     | -3.5 <sup>a</sup>  | 14.1  | 18.2  | 11.8  | 5.1   | 5.0   | 7.2   | 17.1  | 11.6   | 10.5   | 7.8   | 4.8   | -2.3   |     |
| #972     | -24.1 <sup>a</sup> | -16.1 | -16.1 | -16.0 | -18.5 | -20.4 | -15.4 | -20.1 | -26.7  | -27.7  | -25.2 | -29.3 | -36.9  |     |
| #973     | -6.9 <sup>a</sup>  | -0.0  | -2.6  | -10.9 | -4.4  | -7.6  | -1.8  | -3.1  | -10.9  | -11.5  | 0.1   | -6.0  | -12.7  |     |
| #974     | -39.4 <sup>a</sup> | -18.8 | -35.1 | -27.8 | -36.3 | -37.0 | -30.4 | -43.6 | -55.1  | -54.4  | -38.7 | -48.2 | -54.5  |     |
| #975     | -55.8 <sup>a</sup> | -43.8 | -47.1 | -58.9 | -56.2 | -57.2 | -50.1 | -55.7 | -67.6  | -67.4  | -52.5 | -63.0 | -69.8  |     |
| #976     | -68.4 <sup>a</sup> | -41.2 | -50.1 | -64.3 | -65.8 | -67.8 | -54.2 | -70.0 | -82.4  | -81.9  | -64.0 | -74.7 | -81.5  |     |
| #977     | 28.1 <sup>a</sup>  | 27.7  | 29.2  | 29.4  | 31.8  | 29.0  | 21.3  | 17.4  | 10.9   | 9.8    | 15.0  | 11.3  | 3.3    |     |
| #978     | 33.4 <sup>a</sup>  | 16.8  | 16.7  | 24.7  | 26.4  | 22.1  | 25.0  | 19.7  | 10.8   | 10.1   | 17.3  | 11.3  | 2.7    |     |
| #979     | -18.1 <sup>a</sup> | -6.7  | -4.2  | -13.5 | -13.0 | -14.9 | -10.8 | -11.6 | -20.2  | -21.1  | -9.8  | -15.7 | -24.2  |     |
| #980     | -35.7 <sup>a</sup> | -47.1 | -49.0 | -35.0 | -37.2 | -42.2 | -44.6 | -30.5 | -42.1  | -41.9  | -37.4 | -46.8 | -54.6  |     |
| #981     | -43.2 <sup>a</sup> | -48.0 | -48.6 | -36.7 | -42.3 | -46.1 | -42.8 | -33.6 | -45.5  | -45.3  | -40.1 | -49.7 | -57.7  |     |
| #982     | -41.3 <sup>a</sup> | -48.8 | -47.7 | -36.8 | -41.9 | -46.5 | -43.2 | -34.0 | -46.4  | -46.2  | -39.9 | -50.0 | -57.9  |     |
| #983     | -43.3 <sup>a</sup> | -48.8 | -47.7 | -36.8 | -41.4 | -45.8 | -43.3 | -34.1 | -46.5  | -46.3  | -39.9 | -50.0 | -57.9  |     |
| #984     | -6.1 <sup>a</sup>  | -3.3  | 3.0   | -4.2  | -9.4  | -7.1  | 5.3   | 0.1   | -8.4   | -9.6   | -3.5  | -8.4  | -18.4  |     |
| #985     | 33.3 <sup>a</sup>  | 40.7  | 68.5  | 60.0  | 47.3  | 47.5  | 54.9  | 47.0  | 39.2   | 37.9   | 48.0  | 43.3  | 33.8   |     |
| #986     | 5.0 <sup>a</sup>   | -3.0  | 8.0   | 3.2   | 4.9   | 3.9   | 13.9  | 7.1   | -1.3   | -2.5   | 5.7   | 0.9   | -9.2   |     |
| #987     | 38.3 <sup>a</sup>  | 41.7  | 68.9  | 60.8  | 46.9  | 45.2  | 51.6  | 42.5  | 34.8   | 33.5   | 44.1  | 39.6  | 30.1   |     |
| #988     | 1.6 <sup>a</sup>   | -4.6  | 7.0   | 1.7   | 4.5   | 2.7   | 11.6  | 5.8   | -2.5   | -3.9   | 3.3   | -1.4  | -11.5  |     |
| #989     | 16.8 <sup>a</sup>  | 18.0  | 19.4  | 21.9  | 20.3  | 17.1  | 13.6  | 10.5  | 2.3    | 1.3    | 7.7   | 2.7   | -6.3   |     |
| #990     | 25.7 <sup>a</sup>  | 9.3   | 8.8   | 15.4  | 14.9  | 11.5  | 19.6  | 9.7   | -0.9   | -1.6   | 7.7   | 0.3   | -9.3   |     |
| #991     | -20.6 <sup>a</sup> | -9.6  | -5.2  | -16.9 | -17.2 | -19.7 | -15.1 | -21.9 | -32.2  | -33.2  | -18.2 | -25.4 | -35.1  |     |
| #992     | 5.2 <sup>a</sup>   | 13.9  | 10.7  | 3.3   | 8.9   | 5.7   | 13.9  | 12.7  | 3.2    | 2.3    | 16.2  | 8.7   | 0.4    |     |
| #993     | -65.4 <sup>a</sup> | -39.5 | -54.3 | -69.1 | -75.4 | -68.6 | -44.7 | -64.7 | -82.0  | -80.7  | -64.2 | -78.7 | -87.4  |     |
| #994     | -5.6 <sup>a</sup>  | -11.7 | 1.9   | -5.9  | -6.4  | -6.3  | 8.1   | -1.2  | -11.1  | -12.4  | -3.0  | -9.0  | -20.1  |     |
| #995     | -9.4 <sup>a</sup>  | -13.5 | 0.8   | -7.4  | -6.2  | -7.3  | 5.7   | -2.5  | -12.3  | -13.7  | -5.3  | -11.3 | -22.5  |     |
| #996     | 24.5 <sup>a</sup>  | 29.9  | 61.0  | 51.4  | 36.6  | 35.8  | 44.8  | 35.0  | 26.0   | 24.6   | 36.1  | 30.5  | 19.9   |     |
| #997     | -14.6 <sup>a</sup> | -14.7 | 1.4   | -9.6  | -8.8  | -9.4  | 2.2   | -3.6  | -13.8  | -15.0  | -5.0  | -11.4 | -22.4  |     |
| #998     | 23.6 <sup>a</sup>  | 29.6  | 60.9  | 51.1  | 36.3  | 36.1  | 45.7  | 35.7  | 26.6   | 25.2   | 36.7  | 31.1  | 20.5   |     |
| #999     | 7.2 <sup>a</sup>   | 12.5  | 9.9   | 14.5  | 11.6  | 8.3   | 5.1   | 1.6   | -8.2   | -9.1   | -0.5  | -6.9  | -16.8  |     |
| #1000    | 32.7 <sup>a</sup>  | 48.7  | 42.7  | 29.7  | 18.5  | 20.6  | 51.2  | 35.9  | 24.9   | 24.0   | 30.2  | 22.5  | 12.3   |     |
| #1001    | -11.1 <sup>a</sup> | -4.6  | -2.4  | -14.3 | -9.7  | -11.9 | -8.7  | -18.4 | -31.0  | -31.7  | -10.4 | -19.7 | -30.2  |     |
| #1002    | -26.9 <sup>a</sup> | -17.3 | -12.9 | -26.4 | -27.5 | -29.7 | -20.1 | -31.4 | -43.4  | -44.3  | -27.3 | -35.9 | -46.6  |     |
| #1003    | -12.8 <sup>a</sup> | 2.8   | 0.4   | -4.2  | -11.0 | -11.8 | 1.2   | -9.6  | -21.9  | -23.0  | -9.2  | -17.4 | -29.4  |     |
| #1004    | -16.7 <sup>a</sup> | -4.7  | -6.6  | -18.8 | -16.0 | -18.3 | -11.5 | -23.9 | -39.0  | -39.5  | -16.0 | -27.5 | -38.8  |     |
| #1005    | 7.4 <sup>a</sup>   | 50.5  | 33.0  | 21.2  | 8.7   | 9.0   | 33.0  | 8.8   | -5.8   | -6.2   | 12.8  | 1.7   | -9.6   |     |
| #1006    | -76.2 <sup>a</sup> | -52.1 | -78.1 | -69.1 | -75.6 | -71.6 | -57.4 | -67.6 | -89.4  | -86.7  | -72.1 | -88.9 | -100.3 |     |
| #1007    | -89.4 <sup>a</sup> | -73.9 | -88.2 | -89.2 | -86.9 | -90.1 | -84.7 | -85.4 | -102.6 | -101.9 | -84.1 | -98.2 | -108.7 |     |

. . . continued on next page . . .

Table S24: . . . continued from previous page . . .

| Molecule | Ref.                | MNDO   | AMI    | PM3    | PM6    | PM7    | OM1    | OM2    |        | OM3    |        | D3T    | D3     | D3T    |
|----------|---------------------|--------|--------|--------|--------|--------|--------|--------|--------|--------|--------|--------|--------|--------|
|          |                     |        |        |        |        |        |        | D2     | D3     | D2     | D3     |        |        |        |
| #1008    | 22.5 <sup>a</sup>   | 16.8   | 32.9   | 20.0   | 20.8   | 21.2   | 37.4   | 32.0   | 20.5   | 18.9   | 33.7   | 27.1   | 13.8   | 13.8   |
| #1009    | -23.0 <sup>a</sup>  | -11.8  | -10.8  | -25.6  | -19.2  | -22.1  | -16.7  | -25.1  | -42.6  | -43.0  | -19.0  | -32.6  | -44.8  | -44.7  |
| #1010    | 8.3 <sup>a</sup>    | 17.8   | 22.4   | 13.8   | 10.4   | 12.9   | 24.7   | 11.6   | -1.2   | -2.8   | 11.4   | 3.9    | -10.5  | -10.5  |
| #1011    | 62.9 <sup>a</sup>   | 86.2   | 84.2   | 69.6   | 63.4   | 61.1   | 80.5   | 63.4   | 49.5   | 47.7   | 65.8   | 56.8   | 42.5   | 42.6   |
| #1012    | -29.7 <sup>a</sup>  | -11.6  | -15.3  | -28.9  | -25.6  | -28.5  | -19.9  | -30.3  | -50.3  | -50.5  | -25.1  | -41.2  | -54.3  | -54.1  |
| #1013    | -68.4 <sup>a</sup>  | -43.6  | -67.1  | -69.2  | -73.4  | -69.8  | -56.5  | -69.3  | -95.0  | -92.2  | -64.5  | -84.6  | -98.0  | -97.7  |
| #1014    | -12.2 <sup>a</sup>  | 37.3   | 15.7   | 2.5    | -10.4  | -10.5  | 20.4   | -11.5  | -32.0  | -32.0  | -6.2   | -22.3  | -36.4  | -36.4  |
| #1017    | -58.7 <sup>a</sup>  | -44.9  | -45.0  | -47.0  | -49.3  | -51.6  | -43.6  | -39.9  | -41.6  | -42.1  | -49.3  | -50.5  | -52.8  | -52.8  |
| #1018    | -56.3 <sup>a</sup>  | -43.9  | -41.3  | -47.5  | -48.8  | -51.4  | -44.6  | -40.9  | -43.9  | -44.5  | -46.3  | -48.6  | -51.8  | -51.8  |
| #1019    | 25.6 <sup>a</sup>   | 21.0   | 68.8   | 55.3   | 34.2   | 28.7   | 40.6   | 33.2   | 28.8   | 27.9   | 31.5   | 28.5   | 23.4   | 23.4   |
| #1020    | -69.3 <sup>a</sup>  | -51.3  | -52.0  | -60.2  | -65.2  | -66.1  | -53.8  | -52.8  | -59.3  | -59.6  | -59.5  | -64.7  | -69.8  | -69.7  |
| #1021    | 1.2 <sup>a</sup>    | -4.7   | 25.7   | 14.5   | 4.4    | 4.0    | 19.3   | 13.7   | 7.8    | 6.9    | 10.9   | 6.7    | 0.6    | 0.6    |
| #1022    | -73.4 <sup>a</sup>  | -55.3  | -58.3  | -64.6  | -69.2  | -70.6  | -58.9  | -57.3  | -66.1  | -66.2  | -64.1  | -71.3  | -77.1  | -77.1  |
| #1023    | -65.1 <sup>a</sup>  | -45.4  | -47.7  | -59.9  | -63.1  | -64.3  | -52.2  | -51.6  | -60.8  | -60.8  | -54.0  | -61.9  | -67.6  | -67.5  |
| #1024    | -49.1 <sup>a</sup>  | -31.4  | -23.8  | -48.1  | -44.8  | -49.3  | -40.0  | -42.5  | -51.2  | -51.4  | -33.5  | -40.9  | -46.8  | -46.7  |
| #1027    | -14.2 <sup>a</sup>  | -22.9  | 4.5    | -15.9  | -6.4   | -10.5  | 0.7    | 9.5    | 5.1    | 3.8    | 2.9    | 0.3    | -5.9   | -5.9   |
| #1213    | -15.8 <sup>a</sup>  | -36.7  | -31.8  | -9.1   | -16.5  | -19.2  | -24.4  | -16.8  | -18.0  | -18.4  | -20.0  | -20.9  | -22.6  | -22.6  |
| #1214    | 3.3                 | 3.3    | -9.9   | -15.9  | -16.3  | -17.2  | -6.9   | -17.3  | -18.8  | -19.1  | -15.7  | -16.7  | -18.5  | -18.5  |
| #1215    | -25.9 <sup>a</sup>  | -42.0  | -38.7  | -15.0  | -24.6  | -27.2  | -33.6  | -24.9  | -27.6  | -27.9  | -28.1  | -30.2  | -32.8  | -32.8  |
| #1216    | -93.7 <sup>a</sup>  | -95.7  | -101.5 | -96.0  | -93.2  | -93.2  | -91.8  | -90.8  | -93.5  | -93.9  | -94.1  | -96.1  | -99.0  | -99.0  |
| #1217    | -101.6 <sup>a</sup> | -89.0  | -91.2  | -89.7  | -92.3  | -92.3  | -87.3  | -85.9  | -88.3  | -88.9  | -88.7  | -90.5  | -93.3  | -93.3  |
| #1218    | -23.5 <sup>a</sup>  | -3.3   | -16.9  | -21.4  | -21.7  | -22.6  | -14.7  | -23.4  | -26.4  | -26.6  | -22.1  | -24.0  | -26.8  | -26.8  |
| #1219    | -99.1 <sup>a</sup>  | -98.7  | -105.0 | -101.1 | -99.4  | -99.1  | -96.6  | -98.4  | -103.0 | -103.2 | -101.2 | -104.7 | -108.6 | -108.5 |
| #1220    | -101.0 <sup>a</sup> | -99.0  | -104.9 | -99.2  | -97.4  | -97.6  | -97.6  | -94.1  | -98.4  | -98.6  | -97.7  | -100.9 | -104.7 | -104.7 |
| #1221    | -31.9 <sup>a</sup>  | -44.7  | -42.8  | -19.6  | -32.8  | -35.2  | -39.5  | -35.0  | -39.4  | -39.5  | -37.4  | -40.8  | -44.3  | -44.3  |
| #1222    | -87.8 <sup>a</sup>  | -94.0  | -98.7  | -96.4  | -93.9  | -94.0  | -91.7  | -89.6  | -93.7  | -94.1  | -88.4  | -91.6  | -95.3  | -95.3  |
| #1223    | -28.4 <sup>a</sup>  | -46.9  | -44.6  | -18.8  | -29.5  | -32.2  | -39.1  | -30.3  | -34.5  | -34.7  | -33.1  | -36.3  | -39.7  | -39.7  |
| #1224    | -106.7 <sup>a</sup> | -94.3  | -97.0  | -94.6  | -100.8 | -100.1 | -96.6  | -94.2  | -98.1  | -98.5  | -97.0  | -99.9  | -103.6 | -103.6 |
| #1225    | -58.2 <sup>a</sup>  | -57.7  | -61.2  | -53.5  | -58.5  | -59.3  | -57.7  | -57.7  | -61.5  | -62.0  | -57.8  | -60.4  | -64.4  | -64.4  |
| #1226    | -89.8 <sup>a</sup>  | -87.7  | -77.4  | -87.8  | -91.8  | -91.1  | -82.5  | -79.7  | -84.1  | -84.6  | -88.3  | -91.0  | -95.9  | -95.9  |
| #1227    | -39.1 <sup>a</sup>  | -10.1  | -28.2  | -31.9  | -33.9  | -34.3  | -25.9  | -36.2  | -43.0  | -42.9  | -34.8  | -40.4  | -44.9  | -44.9  |
| #1228    | -42.2 <sup>a</sup>  | -3.6   | -24.0  | -32.3  | -36.1  | -35.7  | -23.7  | -39.8  | -47.0  | -46.7  | -37.8  | -43.7  | -48.2  | -48.2  |
| #1229    | -105.0 <sup>a</sup> | -104.2 | -111.7 | -104.4 | -102.2 | -102.4 | -102.5 | -98.8  | -104.8 | -104.9 | -102.6 | -107.2 | -111.9 | -111.9 |
| #1230    | -36.1 <sup>a</sup>  | -47.9  | -49.6  | -24.9  | -35.3  | -37.6  | -42.4  | -36.8  | -43.1  | -43.0  | -38.9  | -44.0  | -48.2  | -48.2  |
| #1231    | -34.8 <sup>a</sup>  | -51.5  | -52.4  | -25.6  | -34.4  | -37.1  | -44.3  | -34.2  | -40.1  | -40.1  | -37.6  | -42.3  | -46.7  | -46.6  |
| #1232    | -36.5 <sup>a</sup>  | -48.2  | -48.8  | -24.5  | -37.3  | -39.9  | -44.5  | -39.8  | -46.1  | -46.1  | -41.9  | -47.0  | -51.3  | -51.3  |
| #1233    | -41.0 <sup>a</sup>  | -42.5  | -45.8  | -25.1  | -41.8  | -43.0  | -42.5  | -45.6  | -52.3  | -52.2  | -46.6  | -52.2  | -56.5  | -56.5  |
| #1234    | -94.9 <sup>a</sup>  | -103.3 | -111.0 | -99.9  | -95.6  | -93.6  | -93.0  | -86.5  | -93.2  | -93.2  | -86.7  | -92.2  | -96.8  | -96.8  |
| #1235    | -61.2 <sup>a</sup>  | -51.1  | -28.9  | -52.6  | -51.8  | -50.8  | -44.2  | -44.4  | -49.2  | -50.0  | -46.5  | -49.6  | -55.2  | -55.2  |
| #1236    | -94.1 <sup>a</sup>  | -92.0  | -90.0  | -94.4  | -100.9 | -99.7  | -90.9  | -87.4  | -94.0  | -94.2  | -94.8  | -99.3  | -105.3 | -105.2 |
| #1237    | -93.1 <sup>a</sup>  | -86.0  | -72.3  | -88.2  | -91.8  | -91.5  | -83.5  | -82.8  | -88.8  | -89.3  | -86.3  | -90.4  | -96.2  | -96.2  |
| #1238    | -87.5 <sup>a</sup>  | -100.9 | -98.1  | -99.7  | -95.8  | -92.2  | -92.0  | -87.9  | -95.2  | -95.4  | -88.9  | -94.9  | -100.9 | -100.8 |
| #1239    | -110.0 <sup>a</sup> | -109.0 | -118.7 | -110.0 | -107.6 | -108.0 | -108.0 | -103.5 | -111.1 | -111.1 | -107.6 | -113.6 | -119.1 | -119.1 |
| #1240    | -88.5 <sup>a</sup>  | -81.8  | -84.7  | -90.3  | -88.6  | -87.3  | -81.6  | -86.7  | -94.2  | -94.4  | -77.2  | -83.3  | -88.6  | -88.6  |
| #1241    | -45.8 <sup>a</sup>  | -44.1  | -51.0  | -29.0  | -45.2  | -47.0  | -46.7  | -49.6  | -58.6  | -58.1  | -50.1  | -57.7  | -62.8  | -62.8  |

. . . continued on next page . . .





Table S24: . . . continued from previous page . . .

| Molecule | Ref.                | MNDO   | AMI    | PM3    | PM6    | PM7    | OM1    |        |        | OM2    |        |        | OM3    |        |     | OM3 |    |     |
|----------|---------------------|--------|--------|--------|--------|--------|--------|--------|--------|--------|--------|--------|--------|--------|-----|-----|----|-----|
|          |                     |        |        |        |        |        | D2     | D3     | D3T    | D2     | D3     | D3T    | D2     | D3     | D3T | D2  | D3 | D3T |
| #1438    | -211.6 <sup>a</sup> | -220.4 | -237.5 | -223.1 | -227.1 | -226.8 | -219.3 | -214.2 | -226.0 | -226.4 | -226.3 | -220.9 | -230.4 | -238.9 |     |     |    |     |
| #1439    | -230.2 <sup>a</sup> | -217.5 | -242.4 | -233.4 | -242.9 | -242.3 | -228.9 | -232.7 | -249.6 | -249.6 | -249.4 | -236.7 | -250.4 | -260.9 |     |     |    |     |
| #1458    | -12.4 <sup>a</sup>  | 56.4   | 21.1   | -10.0  | 1.8    | -0.8   | 15.4   | -6.9   | -13.4  | -13.9  | -13.9  | -4.2   | -9.3   | -14.6  |     |     |    |     |
| #1459    | 12.9 <sup>a</sup>   | 74.7   | 41.2   | 3.4    | 8.9    | 10.8   | 46.0   | 4.9    | -6.0   | -7.2   | -7.1   | 10.9   | 3.5    | -7.4   |     |     |    |     |
| #1460    | -184.4 <sup>a</sup> | -161.3 | -155.0 | -182.1 | -182.1 | -183.7 | -165.9 | -186.4 | -197.9 | -199.2 | -199.1 | -175.3 | -183.1 | -194.2 |     |     |    |     |
| #1461    | -269.0 <sup>a</sup> | -258.1 | -273.1 | -276.0 | -273.5 | -276.3 | -261.3 | -256.5 | -271.8 | -272.5 | -272.4 | -265.3 | -277.1 | -288.4 |     |     |    |     |
| #1462    | -5.8 <sup>a</sup>   | 39.9   | 12.5   | -25.5  | -18.3  | -15.9  | 21.4   | -16.3  | -27.7  | -28.9  | -28.9  | -6.8   | -14.6  | -25.7  |     |     |    |     |
| #1463    | -20.1 <sup>a</sup>  | 36.8   | 7.9    | -30.0  | -27.0  | -24.8  | 13.7   | -25.7  | -39.5  | -40.6  | -40.5  | -16.7  | -26.6  | -38.7  |     |     |    |     |
| #1471    | -64.7 <sup>a</sup>  | -6.6   | -73.7  | -77.9  | -99.4  | -82.4  | -56.9  | -84.9  | -94.4  | -94.9  | -94.8  | -72.0  | -79.5  | -86.5  |     |     |    |     |
| #1475    | 11.3 <sup>a</sup>   | 142.6  | 60.7   | 5.5    | 29.5   | 23.8   | 56.8   | 15.2   | -3.8   | -4.8   | -4.6   | 22.9   | 6.7    | -5.7   |     |     |    |     |

<sup>a</sup> Taken from the experimental and high-level ab initio data quoted in: [http://openmopac.net/PM7\\_accuracy/molecules.html](http://openmopac.net/PM7_accuracy/molecules.html) ; J.J.P.Stewart, J.Mol.Model. 19, 1 (2013).



Table S25: Benchmark Results for the PM7-CHNOF Data Set. Ionization Potentials (eV)

| Molecule | Ref.               | MNDO  | AM1   | PM3   | PM6   | PM7   | OM1   | OM2   |       | OM3   |       | D3T   |
|----------|--------------------|-------|-------|-------|-------|-------|-------|-------|-------|-------|-------|-------|
|          |                    |       |       |       |       |       |       | D2    | D3    | D2    | D3    |       |
| #3       | 15.40 <sup>a</sup> | 15.75 | 14.92 | 16.11 | 15.04 | 15.03 | 15.96 | 15.68 | 15.68 | 15.65 | 15.65 | 15.65 |
| #588     | 15.60 <sup>a</sup> | 14.87 | 14.32 | 13.80 | 12.86 | 13.66 | 15.19 | 15.46 | 15.46 | 15.46 | 15.46 | 15.46 |
| #54      | 13.60 <sup>a</sup> | 13.87 | 13.31 | 13.64 | 13.68 | 13.73 | 14.28 | 13.64 | 13.64 | 13.64 | 13.64 | 13.64 |
| #60      | 11.40 <sup>a</sup> | 11.01 | 11.50 | 11.61 | 11.59 | 11.62 | 11.49 | 11.55 | 11.55 | 11.55 | 11.55 | 11.55 |
| #64      | 10.50 <sup>a</sup> | 10.17 | 10.55 | 10.64 | 10.68 | 10.75 | 10.79 | 10.74 | 10.74 | 10.74 | 10.74 | 10.74 |
| #69      | 12.00 <sup>a</sup> | 12.70 | 11.77 | 11.98 | 11.92 | 11.97 | 12.44 | 11.92 | 11.92 | 11.92 | 11.92 | 11.92 |
| #84      | 10.10 <sup>a</sup> | 10.02 | 10.14 | 10.18 | 10.37 | 10.40 | 10.19 | 10.16 | 10.16 | 10.16 | 10.16 | 10.16 |
| #85      | 9.90 <sup>a</sup>  | 9.88  | 9.82  | 9.88  | 10.08 | 10.16 | 9.97  | 9.84  | 9.84  | 9.84  | 9.84  | 9.84  |
| #88      | 10.40 <sup>a</sup> | 10.72 | 10.74 | 10.89 | 10.73 | 10.76 | 10.66 | 10.64 | 10.64 | 10.64 | 10.64 | 10.64 |
| #93      | 11.00 <sup>a</sup> | 11.43 | 11.48 | 11.78 | 11.41 | 11.59 | 11.61 | 10.88 | 10.88 | 10.88 | 10.88 | 10.88 |
| #96      | 9.90 <sup>a</sup>  | 9.96  | 9.99  | 10.10 | 10.04 | 10.12 | 10.08 | 9.99  | 9.99  | 9.99  | 9.99  | 9.99  |
| #99      | 11.50 <sup>a</sup> | 12.34 | 11.32 | 11.51 | 11.34 | 11.39 | 11.84 | 11.39 | 11.40 | 11.39 | 11.39 | 11.39 |
| #105     | 10.20 <sup>a</sup> | 9.99  | 10.37 | 10.47 | 10.58 | 10.53 | 10.06 | 10.30 | 10.30 | 10.30 | 10.30 | 10.30 |
| #107     | 9.10 <sup>a</sup>  | 9.01  | 9.34  | 9.34  | 9.62  | 9.65  | 9.19  | 9.35  | 9.35  | 9.35  | 9.35  | 9.35  |
| #117     | 9.60 <sup>a</sup>  | 10.47 | 10.17 | 10.34 | 10.02 | 10.05 | 9.98  | 9.91  | 9.91  | 9.91  | 9.91  | 9.91  |
| #121     | 9.10 <sup>a</sup>  | 9.14  | 9.33  | 9.47  | 9.58  | 9.61  | 9.29  | 9.32  | 9.32  | 9.32  | 9.32  | 9.32  |
| #125     | 9.70 <sup>a</sup>  | 9.97  | 10.00 | 10.15 | 9.96  | 10.03 | 10.04 | 9.93  | 9.93  | 9.93  | 9.93  | 9.93  |
| #127     | 10.70 <sup>a</sup> | 11.81 | 10.99 | 11.02 | 11.02 | 11.07 | 11.06 | 10.38 | 10.37 | 10.38 | 10.38 | 10.38 |
| #135     | 11.20 <sup>a</sup> | 12.21 | 11.17 | 11.35 | 11.13 | 11.18 | 11.59 | 10.95 | 10.94 | 10.94 | 10.94 | 10.94 |
| #136     | 11.40 <sup>a</sup> | 12.12 | 11.29 | 11.59 | 11.21 | 11.28 | 11.54 | 11.06 | 11.07 | 11.07 | 11.07 | 11.07 |
| #146     | 8.60 <sup>a</sup>  | 9.04  | 9.08  | 9.23  | 9.20  | 9.31  | 8.92  | 8.82  | 8.82  | 8.82  | 8.82  | 8.82  |
| #167     | 11.30 <sup>a</sup> | 12.12 | 11.53 | 12.06 | 11.34 | 11.38 | 11.30 | 10.82 | 10.82 | 10.82 | 10.82 | 10.82 |
| #173     | 9.20 <sup>a</sup>  | 9.39  | 9.65  | 9.75  | 9.64  | 9.82  | 9.66  | 9.59  | 9.59  | 9.59  | 9.59  | 9.59  |
| #186     | 10.30 <sup>a</sup> | 9.75  | 9.49  | 9.59  | 9.40  | 9.49  | 9.44  | 9.29  | 9.29  | 9.29  | 9.29  | 9.29  |
| #194     | 10.30 <sup>a</sup> | 11.74 | 10.94 | 11.29 | 10.78 | 10.81 | 10.85 | 10.16 | 10.16 | 10.16 | 10.16 | 10.16 |
| #279     | 8.10 <sup>a</sup>  | 8.57  | 8.71  | 8.84  | 8.88  | 8.95  | 8.48  | 8.51  | 8.51  | 8.51  | 8.51  | 8.51  |
| #111     | 9.10 <sup>a</sup>  | 9.84  | 9.67  | 9.72  | 9.72  | 9.79  | 9.58  | 9.49  | 9.50  | 9.49  | 9.49  | 9.49  |
| #113     | 10.20 <sup>a</sup> | 10.68 | 10.62 | 10.77 | 10.62 | 10.63 | 10.55 | 10.51 | 10.51 | 10.51 | 10.51 | 10.51 |
| #118     | 9.40 <sup>a</sup>  | 9.77  | 9.72  | 9.82  | 9.81  | 9.93  | 9.78  | 9.65  | 9.65  | 9.64  | 9.64  | 9.64  |
| #153     | 9.20 <sup>a</sup>  | 9.72  | 9.44  | 9.52  | 9.43  | 9.50  | 9.41  | 9.22  | 9.22  | 9.22  | 9.22  | 9.22  |
| #162     | 10.50 <sup>a</sup> | 12.06 | 10.97 | 11.07 | 11.00 | 11.03 | 11.46 | 10.91 | 10.91 | 10.91 | 10.91 | 10.91 |
| #166     | 10.30 <sup>a</sup> | 12.16 | 11.11 | 11.30 | 11.04 | 11.09 | 11.41 | 10.66 | 10.65 | 10.66 | 10.66 | 10.66 |
| #205     | 8.50 <sup>a</sup>  | 8.72  | 8.75  | 8.95  | 8.89  | 9.01  | 8.50  | 8.57  | 8.58  | 8.58  | 8.58  | 8.58  |
| #207     | 8.80 <sup>a</sup>  | 9.28  | 9.33  | 9.44  | 9.24  | 9.43  | 9.26  | 9.16  | 9.16  | 9.16  | 9.16  | 9.16  |
| #231     | 8.80 <sup>a</sup>  | 9.28  | 9.38  | 9.52  | 9.28  | 9.45  | 9.24  | 9.14  | 9.13  | 9.14  | 9.14  | 9.14  |
| #245     | 9.40 <sup>a</sup>  | 11.40 | 10.56 | 10.94 | 10.34 | 10.38 | 10.30 | 9.76  | 9.75  | 9.75  | 9.75  | 9.75  |
| #299     | 9.60 <sup>a</sup>  | 11.27 | 10.43 | 10.85 | 10.17 | 10.20 | 10.13 | 9.59  | 9.59  | 9.59  | 9.59  | 9.59  |
| #335     | 8.20 <sup>a</sup>  | 8.05  | 8.12  | 8.25  | 8.37  | 8.39  | 7.74  | 7.81  | 7.80  | 7.80  | 7.81  | 7.81  |
| #447     | 13.60 <sup>a</sup> | 13.41 | 13.68 | 12.60 | 13.13 | 13.80 | 13.56 | 13.91 | 13.91 | 13.91 | 13.91 | 13.91 |
| #454     | 9.60 <sup>a</sup>  | 10.56 | 9.76  | 9.40  | 9.42  | 9.48  | 10.14 | 9.75  | 9.75  | 9.75  | 9.75  | 9.75  |
| #459     | 12.20 <sup>a</sup> | 12.79 | 12.46 | 12.33 | 12.77 | 12.77 | 12.45 | 12.50 | 12.50 | 12.50 | 12.50 | 12.50 |
| #460     | 11.30 <sup>a</sup> | 12.24 | 11.99 | 11.70 | 11.49 | 11.60 | 12.29 | 12.14 | 12.14 | 12.14 | 12.14 | 12.14 |
| #462     | 9.90 <sup>a</sup>  | 10.68 | 10.31 | 9.92  | 9.97  | 10.16 | 10.39 | 10.13 | 10.13 | 10.13 | 10.13 | 10.13 |
| #467     | 8.90 <sup>a</sup>  | 10.04 | 9.39  | 9.22  | 8.96  | 9.07  | 9.45  | 9.23  | 9.24  | 9.24  | 9.23  | 9.23  |

... continued on next page ...

Table S25: . . . continued from previous page . . .

| Molecule | Ref.               | MNDO  | AMI   | PM3   | PM6   | PM7   | OM1   | OM2   |       |       | OM3   |       |       | D3T   |
|----------|--------------------|-------|-------|-------|-------|-------|-------|-------|-------|-------|-------|-------|-------|-------|
|          |                    |       |       |       |       |       |       | D2    | D3    | D3T   | D2    | D3    | D3T   |       |
| #470     | 11.80 <sup>a</sup> | 11.35 | 11.65 | 11.58 | 11.99 | 11.95 | 11.37 | 11.58 | 11.58 | 11.58 | 11.67 | 11.67 | 11.67 | 11.67 |
| #472     | 10.90 <sup>a</sup> | 10.61 | 10.86 | 10.89 | 11.25 | 11.28 | 10.85 | 10.88 | 10.88 | 10.88 | 10.88 | 10.88 | 10.88 | 11.09 |
| #476     | 8.50 <sup>a</sup>  | 9.59  | 9.12  | 9.07  | 8.65  | 8.83  | 8.90  | 8.84  | 8.86  | 8.85  | 8.85  | 8.85  | 8.85  | 8.69  |
| #484     | 8.20 <sup>a</sup>  | 8.56  | 8.66  | 8.93  | 8.90  | 9.02  | 8.40  | 8.46  | 8.46  | 8.47  | 8.47  | 8.47  | 8.47  | 8.65  |
| #493     | 9.70 <sup>a</sup>  | 9.69  | 9.93  | 10.10 | 10.10 | 10.24 | 9.99  | 9.96  | 9.96  | 9.96  | 9.96  | 9.96  | 9.96  | 8.65  |
| #466     | 9.50 <sup>a</sup>  | 10.51 | 9.89  | 9.50  | 9.46  | 9.52  | 9.96  | 9.60  | 9.60  | 9.60  | 9.60  | 9.60  | 9.60  | 10.13 |
| #473     | 11.90 <sup>a</sup> | 12.59 | 11.99 | 12.01 | 12.30 | 12.28 | 12.18 | 12.06 | 12.06 | 12.06 | 12.06 | 12.06 | 12.06 | 12.25 |
| #508     | 7.70 <sup>a</sup>  | 8.75  | 8.52  | 8.61  | 8.47  | 8.46  | 8.55  | 8.24  | 8.24  | 8.24  | 8.24  | 8.24  | 8.24  | 8.43  |
| #518     | 9.70 <sup>a</sup>  | 9.81  | 10.02 | 10.10 | 10.18 | 10.33 | 9.95  | 9.91  | 9.90  | 9.91  | 9.91  | 9.91  | 9.91  | 10.16 |
| #593     | 9.00 <sup>a</sup>  | 8.67  | 8.82  | 9.22  | 9.53  | 9.54  | 8.30  | 8.84  | 8.84  | 8.84  | 8.84  | 8.84  | 8.84  | 10.16 |
| #595     | 9.30 <sup>a</sup>  | 9.66  | 8.97  | 8.92  | 8.58  | 8.74  | 8.96  | 9.73  | 9.74  | 9.73  | 9.73  | 9.73  | 9.73  | 8.75  |
| #687     | 9.80 <sup>a</sup>  | 9.91  | 9.59  | 9.96  | 9.94  | 9.92  | 9.19  | 9.63  | 9.64  | 9.64  | 9.64  | 9.64  | 9.64  | 9.91  |
| #729     | 10.10 <sup>a</sup> | 11.04 | 10.78 | 10.63 | 10.20 | 10.35 | 10.85 | 11.03 | 11.03 | 11.03 | 11.03 | 11.03 | 11.03 | 9.91  |
| #735     | 11.00 <sup>a</sup> | 11.42 | 11.13 | 11.14 | 10.53 | 10.73 | 11.22 | 11.22 | 11.22 | 11.22 | 11.22 | 11.22 | 11.22 | 11.26 |
| #741     | 9.60 <sup>a</sup>  | 9.29  | 9.60  | 9.46  | 9.86  | 9.89  | 9.39  | 9.75  | 9.74  | 9.75  | 9.75  | 9.75  | 9.75  | 11.60 |
| #744     | 10.20 <sup>a</sup> | 10.88 | 10.72 | 10.71 | 10.24 | 10.30 | 10.51 | 10.62 | 10.62 | 10.62 | 10.62 | 10.62 | 10.62 | 9.97  |
| #747     | 10.00 <sup>a</sup> | 11.04 | 10.61 | 10.69 | 9.76  | 9.95  | 10.67 | 10.51 | 10.52 | 10.51 | 10.51 | 10.51 | 10.51 | 10.94 |
| #752     | 10.10 <sup>a</sup> | 10.64 | 10.69 | 10.68 | 10.19 | 10.27 | 10.47 | 10.55 | 10.55 | 10.55 | 10.55 | 10.55 | 10.55 | 10.94 |
| #754     | 9.70 <sup>a</sup>  | 10.75 | 10.67 | 10.77 | 10.26 | 10.24 | 10.17 | 10.29 | 10.29 | 10.29 | 10.29 | 10.29 | 10.29 | 10.86 |
| #762     | 8.90 <sup>a</sup>  | 9.14  | 9.32  | 9.38  | 9.54  | 9.55  | 9.12  | 9.03  | 9.03  | 9.03  | 9.03  | 9.03  | 9.03  | 10.65 |
| #1053    | 11.50 <sup>a</sup> | 11.74 | 11.82 | 11.56 | 11.58 | 11.53 | 11.52 | 11.72 | 11.72 | 11.72 | 11.72 | 11.72 | 11.72 | 9.45  |
| #1054    | 10.60 <sup>a</sup> | 10.75 | 10.66 | 10.57 | 10.05 | 10.26 | 10.22 | 10.57 | 10.57 | 10.57 | 10.57 | 10.57 | 10.57 | 10.65 |
| #1059    | 11.00 <sup>a</sup> | 11.61 | 11.57 | 11.35 | 11.23 | 11.13 | 11.27 | 11.24 | 11.24 | 11.24 | 11.24 | 11.24 | 11.24 | 12.12 |
| #745     | 10.60 <sup>a</sup> | 11.49 | 11.33 | 11.34 | 10.27 | 10.55 | 11.40 | 11.31 | 11.31 | 11.31 | 11.31 | 11.31 | 11.31 | 10.77 |
| #749     | 10.60 <sup>a</sup> | 11.30 | 10.88 | 10.90 | 10.39 | 10.53 | 10.94 | 10.88 | 10.88 | 10.88 | 10.88 | 10.88 | 10.88 | 11.79 |
| #755     | 10.00 <sup>a</sup> | 10.81 | 10.59 | 10.62 | 10.10 | 10.19 | 10.31 | 10.38 | 10.38 | 10.38 | 10.38 | 10.38 | 10.38 | 11.21 |
| #766     | 9.80 <sup>a</sup>  | 10.80 | 10.59 | 10.63 | 10.10 | 10.18 | 10.28 | 10.33 | 10.32 | 10.32 | 10.32 | 10.32 | 10.32 | 10.71 |
| #770     | 9.60 <sup>a</sup>  | 10.91 | 10.39 | 10.48 | 9.59  | 9.73  | 10.35 | 10.23 | 10.23 | 10.23 | 10.23 | 10.23 | 10.23 | 10.70 |
| #787     | 9.70 <sup>a</sup>  | 9.70  | 10.00 | 10.05 | 10.06 | 10.17 | 9.93  | 9.93  | 9.93  | 9.94  | 9.94  | 9.94  | 9.94  | 10.60 |
| #788     | 8.40 <sup>a</sup>  | 8.84  | 9.00  | 9.11  | 8.83  | 8.97  | 8.80  | 8.74  | 8.74  | 8.74  | 8.74  | 8.74  | 8.74  | 10.27 |
| #1057    | 10.80 <sup>a</sup> | 11.57 | 11.62 | 11.44 | 11.41 | 11.30 | 11.15 | 11.33 | 11.33 | 11.33 | 11.33 | 11.33 | 11.33 | 9.15  |
| #1058    | 10.80 <sup>a</sup> | 11.57 | 11.62 | 11.44 | 11.41 | 11.30 | 11.15 | 11.33 | 11.33 | 11.33 | 11.33 | 11.33 | 11.33 | 11.76 |
| #1061    | 10.60 <sup>a</sup> | 10.68 | 10.89 | 10.77 | 9.64  | 9.78  | 10.57 | 10.71 | 10.73 | 10.72 | 10.72 | 10.72 | 10.72 | 11.76 |
| #1069    | 10.60 <sup>a</sup> | 11.40 | 11.37 | 11.29 | 11.19 | 11.04 | 10.86 | 10.96 | 10.96 | 10.96 | 10.96 | 10.96 | 10.96 | 11.19 |
| #1072    | 10.60 <sup>a</sup> | 11.46 | 11.41 | 11.27 | 11.07 | 10.94 | 10.94 | 11.04 | 11.04 | 11.04 | 11.04 | 11.04 | 11.04 | 11.39 |
| #1073    | 10.50 <sup>a</sup> | 11.50 | 11.50 | 11.35 | 11.26 | 11.18 | 10.98 | 11.07 | 11.07 | 11.07 | 11.07 | 11.07 | 11.07 | 11.39 |
| #1091    | 9.10 <sup>a</sup>  | 10.78 | 10.74 | 10.89 | 10.43 | 10.41 | 10.18 | 10.30 | 10.31 | 10.31 | 10.31 | 10.31 | 10.31 | 11.48 |
| #1125    | 9.80 <sup>a</sup>  | 9.77  | 10.08 | 10.13 | 10.19 | 10.26 | 10.01 | 10.08 | 10.08 | 10.08 | 10.08 | 10.08 | 10.08 | 10.69 |
| #1323    | 10.80 <sup>a</sup> | 11.70 | 12.02 | 11.71 | 11.68 | 11.54 | 11.47 | 11.72 | 11.72 | 11.72 | 11.72 | 11.72 | 11.72 | 10.34 |
| #1329    | 9.80 <sup>a</sup>  | 9.26  | 9.47  | 9.45  | 9.59  | 9.61  | 9.09  | 9.23  | 9.23  | 9.23  | 9.23  | 9.23  | 9.23  | 12.07 |
| #1375    | 11.20 <sup>a</sup> | 11.64 | 11.77 | 11.60 | 11.31 | 11.25 | 10.97 | 11.41 | 11.41 | 11.41 | 11.41 | 11.41 | 11.41 | 12.07 |
| #1496    | 13.30 <sup>a</sup> | 13.05 | 12.10 | 12.92 | 13.27 | 13.17 | 13.40 | 13.07 | 13.07 | 13.07 | 13.07 | 13.07 | 13.07 | 11.62 |
| #1498    | 11.30 <sup>a</sup> | 11.06 | 11.15 | 11.56 | 11.59 | 11.65 | 11.31 | 11.33 | 11.33 | 11.33 | 11.33 | 11.33 | 11.33 | 13.41 |
| #1500    | 10.60 <sup>a</sup> | 10.17 | 10.24 | 10.60 | 10.81 | 10.84 | 10.66 | 10.59 | 10.59 | 10.59 | 10.59 | 10.59 | 10.59 | 11.52 |
| #1586    | 14.80 <sup>a</sup> | 14.57 | 13.31 | 14.36 | 14.54 | 14.46 | 14.43 | 14.17 | 14.17 | 14.17 | 14.17 | 14.17 | 14.17 | 10.85 |
|          |                    |       |       |       |       |       |       |       |       |       |       |       |       | 14.45 |

. . . continued on next page . . .

Table S25: . . . continued from previous page . . .

| Molecule | Ref.               | MNDO  | AMI   | PM3   | PM6   | PM7   | OM1   |       | OM2   |       | OM3   |       | OM3   |       | D3T   |
|----------|--------------------|-------|-------|-------|-------|-------|-------|-------|-------|-------|-------|-------|-------|-------|-------|
|          |                    |       |       |       |       |       | OM1   | OM2   | D2    | D3    | D3T   | D2    | D3    | D3T   |       |
| #1503    | 12.40 <sup>a</sup> | 12.61 | 11.58 | 12.07 | 12.16 | 12.11 | 12.46 | 12.01 | 12.02 | 12.01 | 12.28 | 12.29 | 12.28 | 12.28 | 12.28 |
| #1505    | 11.10 <sup>a</sup> | 12.33 | 11.52 | 12.10 | 11.97 | 11.94 | 12.12 | 11.59 | 11.59 | 11.59 | 11.92 | 11.93 | 11.92 | 11.92 | 11.92 |
| #1506    | 9.20 <sup>a</sup>  | 9.47  | 9.54  | 9.81  | 9.78  | 9.94  | 9.68  | 9.58  | 9.58  | 9.58  | 9.85  | 9.85  | 9.85  | 9.85  | 9.85  |
| #1546    | 13.20 <sup>a</sup> | 13.09 | 12.02 | 12.86 | 13.36 | 13.19 | 13.30 | 12.98 | 12.98 | 12.98 | 13.23 | 13.23 | 13.23 | 13.23 | 13.23 |
| #1550    | 10.70 <sup>a</sup> | 10.18 | 9.99  | 10.54 | 10.79 | 10.80 | 10.46 | 10.38 | 10.38 | 10.38 | 10.56 | 10.56 | 10.56 | 10.56 | 10.56 |
| #1552    | 12.80 <sup>a</sup> | 12.73 | 11.93 | 12.82 | 12.95 | 12.85 | 12.91 | 12.30 | 12.30 | 12.30 | 12.69 | 12.69 | 12.69 | 12.69 | 12.69 |
| #1588    | 10.50 <sup>a</sup> | 10.46 | 10.09 | 10.68 | 10.95 | 10.98 | 10.51 | 10.40 | 10.40 | 10.40 | 10.53 | 10.53 | 10.53 | 10.53 | 10.53 |
| #1592    | 13.80 <sup>a</sup> | 14.01 | 13.12 | 14.38 | 14.13 | 14.06 | 13.96 | 13.23 | 13.22 | 13.23 | 13.78 | 13.77 | 13.78 | 13.78 | 13.78 |
| #1594    | 9.70 <sup>a</sup>  | 10.07 | 10.25 | 10.34 | 10.30 | 10.46 | 10.25 | 10.20 | 10.20 | 10.20 | 10.47 | 10.47 | 10.48 | 10.48 | 10.48 |
| #1625    | 9.80 <sup>a</sup>  | 10.40 | 10.07 | 10.55 | 10.59 | 10.74 | 10.36 | 10.19 | 10.19 | 10.19 | 10.30 | 10.30 | 10.30 | 10.30 | 10.30 |
| #921     | 11.60 <sup>a</sup> | 11.10 | 11.24 | 10.59 | 11.23 | 11.19 | 10.93 | 11.34 | 11.34 | 11.34 | 11.43 | 11.43 | 11.43 | 11.43 | 11.43 |
| #1213    | 11.00 <sup>a</sup> | 11.41 | 11.19 | 10.64 | 10.15 | 10.42 | 10.60 | 10.97 | 10.98 | 10.98 | 11.06 | 11.07 | 11.06 | 11.06 | 11.06 |
| #1214    | 11.30 <sup>a</sup> | 11.54 | 11.98 | 12.17 | 11.43 | 11.24 | 11.16 | 11.84 | 11.84 | 11.84 | 11.74 | 11.73 | 11.74 | 11.74 | 11.74 |
| #1219    | 8.90 <sup>a</sup>  | 10.81 | 10.37 | 9.88  | 10.03 | 9.97  | 10.02 | 9.84  | 9.84  | 9.84  | 10.06 | 10.07 | 10.07 | 10.07 | 10.07 |
| #1245    | 9.90 <sup>a</sup>  | 10.31 | 10.56 | 10.60 | 10.62 | 10.73 | 10.51 | 10.50 | 10.50 | 10.50 | 10.81 | 10.81 | 10.81 | 10.81 | 10.81 |

<sup>a</sup> Taken from the experimental and high-level ab initio data quoted in: [http://openmopac.net/PM7\\_accuracy/molecules.html](http://openmopac.net/PM7_accuracy/molecules.html) ; J.J.P.Stewart, J.Mol.Model. 19, 1 (2013).

Table S26: Benchmark Results for the C7H10O2 Data Set. Atomization Energies (kcal/mol)

| Molecule | Ref.                | MNDO   | AM1    | PM3    | PM6    | PM7    | OM1    | OM2    |        | OM3    |        | D3T    |
|----------|---------------------|--------|--------|--------|--------|--------|--------|--------|--------|--------|--------|--------|
|          |                     |        |        |        |        |        |        | D2     | D3     | D2     | D3     |        |
| gdb 1    | 1909.1 <sup>a</sup> | 1897.5 | 1889.1 | 1897.6 | 1906.8 | 1904.9 | 1894.2 | 1905.9 | 1905.9 | 1903.6 | 1903.6 | 1903.6 |
| gdb 2    | 1908.3 <sup>a</sup> | 1899.0 | 1892.2 | 1900.2 | 1909.3 | 1905.9 | 1892.7 | 1904.9 | 1904.9 | 1902.3 | 1902.2 | 1902.2 |
| gdb 3    | 1904.5 <sup>a</sup> | 1909.6 | 1891.0 | 1900.4 | 1902.6 | 1901.0 | 1891.4 | 1896.8 | 1896.8 | 1897.4 | 1897.4 | 1897.4 |
| gdb 4    | 1906.2 <sup>a</sup> | 1911.1 | 1897.0 | 1903.6 | 1910.0 | 1907.5 | 1896.0 | 1904.5 | 1904.5 | 1903.3 | 1903.2 | 1903.2 |
| gdb 5    | 1907.7 <sup>a</sup> | 1910.1 | 1897.9 | 1904.5 | 1912.6 | 1909.4 | 1896.8 | 1905.2 | 1905.2 | 1904.2 | 1904.2 | 1904.2 |
| gdb 6    | 1904.3 <sup>a</sup> | 1910.2 | 1891.4 | 1901.0 | 1903.8 | 1901.8 | 1891.5 | 1896.8 | 1896.8 | 1897.3 | 1897.3 | 1897.3 |
| gdb 7    | 1907.7 <sup>a</sup> | 1912.4 | 1898.1 | 1903.7 | 1909.5 | 1907.0 | 1896.4 | 1904.4 | 1904.4 | 1903.4 | 1903.4 | 1903.4 |
| gdb 8    | 1910.1 <sup>a</sup> | 1912.0 | 1897.0 | 1903.1 | 1910.6 | 1908.9 | 1899.2 | 1906.7 | 1906.7 | 1906.2 | 1906.2 | 1906.2 |
| gdb 9    | 1907.9 <sup>a</sup> | 1911.6 | 1897.8 | 1904.6 | 1911.7 | 1908.5 | 1896.8 | 1904.8 | 1904.8 | 1904.1 | 1904.1 | 1904.1 |
| gdb 10   | 1906.5 <sup>a</sup> | 1911.5 | 1897.6 | 1903.4 | 1909.2 | 1906.0 | 1895.2 | 1902.4 | 1902.4 | 1900.9 | 1900.8 | 1900.8 |
| gdb 11   | 1899.8 <sup>a</sup> | 1894.4 | 1881.0 | 1890.0 | 1898.6 | 1895.3 | 1886.1 | 1891.4 | 1891.4 | 1887.9 | 1887.9 | 1887.9 |
| gdb 12   | 1908.0 <sup>a</sup> | 1905.5 | 1897.3 | 1899.5 | 1907.9 | 1905.8 | 1898.4 | 1901.6 | 1901.6 | 1901.4 | 1901.4 | 1901.4 |
| gdb 13   | 1895.5 <sup>a</sup> | 1892.7 | 1878.5 | 1887.0 | 1896.3 | 1893.0 | 1880.0 | 1886.6 | 1886.6 | 1884.1 | 1884.1 | 1884.1 |
| gdb 14   | 1905.8 <sup>a</sup> | 1906.0 | 1898.1 | 1900.6 | 1907.3 | 1903.8 | 1895.0 | 1899.2 | 1899.2 | 1898.5 | 1898.4 | 1898.4 |
| gdb 15   | 1911.0 <sup>a</sup> | 1922.9 | 1895.8 | 1909.0 | 1910.6 | 1909.4 | 1896.9 | 1904.2 | 1904.2 | 1905.9 | 1905.9 | 1905.9 |
| gdb 16   | 1903.9 <sup>a</sup> | 1904.2 | 1895.4 | 1897.5 | 1904.2 | 1901.0 | 1893.1 | 1896.8 | 1896.8 | 1896.6 | 1896.6 | 1896.6 |
| gdb 17   | 1905.0 <sup>a</sup> | 1905.7 | 1896.3 | 1899.1 | 1904.4 | 1902.6 | 1896.2 | 1900.8 | 1900.8 | 1899.8 | 1899.8 | 1899.8 |
| gdb 18   | 1894.1 <sup>a</sup> | 1894.0 | 1881.4 | 1886.9 | 1893.9 | 1891.0 | 1884.2 | 1890.0 | 1890.0 | 1885.7 | 1885.7 | 1885.7 |
| gdb 19   | 1903.7 <sup>a</sup> | 1904.9 | 1898.2 | 1900.2 | 1904.7 | 1901.6 | 1891.5 | 1896.7 | 1896.7 | 1895.6 | 1895.6 | 1895.6 |
| gdb 20   | 1902.6 <sup>a</sup> | 1905.8 | 1894.8 | 1898.3 | 1903.0 | 1900.3 | 1893.1 | 1897.4 | 1897.4 | 1896.3 | 1896.3 | 1896.3 |
| gdb 21   | 1892.5 <sup>a</sup> | 1894.2 | 1882.9 | 1887.7 | 1894.4 | 1890.4 | 1881.6 | 1887.8 | 1887.8 | 1883.6 | 1883.6 | 1883.6 |
| gdb 22   | 1906.0 <sup>a</sup> | 1918.6 | 1900.9 | 1906.9 | 1910.3 | 1907.5 | 1896.0 | 1903.0 | 1903.0 | 1902.4 | 1902.4 | 1902.4 |
| gdb 23   | 1906.0 <sup>a</sup> | 1918.3 | 1895.0 | 1905.1 | 1905.5 | 1903.9 | 1893.9 | 1898.4 | 1898.4 | 1899.7 | 1899.7 | 1899.7 |
| gdb 24   | 1898.1 <sup>a</sup> | 1907.6 | 1886.4 | 1897.5 | 1908.6 | 1895.5 | 1881.9 | 1890.5 | 1890.5 | 1886.7 | 1886.6 | 1886.6 |
| gdb 25   | 1908.9 <sup>a</sup> | 1919.6 | 1900.6 | 1906.5 | 1911.3 | 1909.1 | 1897.8 | 1904.3 | 1904.3 | 1904.3 | 1904.2 | 1904.2 |
| gdb 26   | 1907.8 <sup>a</sup> | 1918.3 | 1894.4 | 1905.2 | 1907.7 | 1906.3 | 1896.4 | 1900.6 | 1900.5 | 1902.3 | 1902.3 | 1902.3 |
| gdb 27   | 1899.8 <sup>a</sup> | 1908.5 | 1885.6 | 1897.1 | 1899.5 | 1897.0 | 1884.8 | 1892.5 | 1892.5 | 1889.4 | 1889.4 | 1889.4 |
| gdb 28   | 1909.0 <sup>a</sup> | 1919.5 | 1901.0 | 1907.1 | 1914.1 | 1911.5 | 1900.3 | 1906.1 | 1906.1 | 1906.4 | 1906.3 | 1906.3 |
| gdb 29   | 1897.9 <sup>a</sup> | 1906.5 | 1882.2 | 1893.6 | 1899.2 | 1897.1 | 1883.0 | 1891.1 | 1891.1 | 1889.4 | 1889.4 | 1889.4 |
| gdb 30   | 1908.1 <sup>a</sup> | 1918.0 | 1901.3 | 1907.1 | 1912.8 | 1909.3 | 1896.4 | 1903.4 | 1903.4 | 1903.0 | 1903.0 | 1903.0 |
| gdb 31   | 1895.5 <sup>a</sup> | 1906.0 | 1882.7 | 1893.6 | 1896.6 | 1894.4 | 1880.3 | 1888.9 | 1888.9 | 1886.6 | 1886.6 | 1886.6 |
| gdb 32   | 1903.8 <sup>a</sup> | 1913.5 | 1899.6 | 1902.8 | 1907.8 | 1905.5 | 1897.1 | 1900.4 | 1900.4 | 1900.1 | 1900.0 | 1900.0 |
| gdb 33   | 1902.8 <sup>a</sup> | 1913.6 | 1898.9 | 1902.2 | 1905.8 | 1903.5 | 1895.5 | 1899.0 | 1899.0 | 1898.7 | 1898.7 | 1898.7 |
| gdb 34   | 1892.7 <sup>a</sup> | 1900.7 | 1880.9 | 1889.2 | 1893.2 | 1891.1 | 1879.7 | 1885.3 | 1885.3 | 1883.0 | 1883.0 | 1883.0 |
| gdb 35   | 1894.8 <sup>a</sup> | 1902.6 | 1884.4 | 1893.0 | 1894.0 | 1891.4 | 1881.3 | 1886.5 | 1886.5 | 1883.0 | 1882.9 | 1882.9 |
| gdb 36   | 1908.9 <sup>a</sup> | 1919.8 | 1900.5 | 1906.4 | 1910.8 | 1908.8 | 1898.9 | 1904.8 | 1904.8 | 1904.8 | 1904.8 | 1904.8 |
| gdb 37   | 1907.8 <sup>a</sup> | 1919.0 | 1894.2 | 1904.8 | 1907.6 | 1906.2 | 1896.5 | 1900.5 | 1900.5 | 1902.3 | 1902.3 | 1902.3 |
| gdb 38   | 1899.4 <sup>a</sup> | 1907.9 | 1885.8 | 1897.1 | 1900.5 | 1897.8 | 1884.6 | 1892.4 | 1892.4 | 1889.1 | 1889.1 | 1889.1 |
| gdb 39   | 1904.7 <sup>a</sup> | 1914.7 | 1899.5 | 1902.6 | 1907.1 | 1904.5 | 1896.6 | 1899.8 | 1899.8 | 1899.7 | 1899.7 | 1899.7 |
| gdb 40   | 1892.5 <sup>a</sup> | 1901.2 | 1881.3 | 1889.8 | 1894.8 | 1891.9 | 1879.5 | 1885.4 | 1885.4 | 1883.0 | 1882.9 | 1882.9 |
| gdb 41   | 1903.7 <sup>a</sup> | 1915.0 | 1899.5 | 1902.3 | 1905.4 | 1902.9 | 1898.6 | 1898.7 | 1898.7 | 1898.6 | 1898.6 | 1898.6 |
| gdb 42   | 1894.7 <sup>a</sup> | 1903.1 | 1884.8 | 1893.0 | 1895.5 | 1892.1 | 1881.4 | 1886.5 | 1886.5 | 1882.9 | 1882.9 | 1882.9 |
| gdb 43   | 1906.1 <sup>a</sup> | 1914.7 | 1898.4 | 1901.6 | 1906.4 | 1904.7 | 1898.7 | 1901.3 | 1901.3 | 1901.5 | 1901.5 | 1901.5 |
| gdb 44   | 1896.6 <sup>a</sup> | 1902.8 | 1883.7 | 1892.3 | 1895.8 | 1893.7 | 1884.3 | 1889.0 | 1889.0 | 1885.8 | 1885.7 | 1885.7 |

*... continued on next page ...*

Table S26: ... continued from previous page. ...

| Molecule | Ref.                | MNDO   | AMI    | PM3    | PM6    | PM7    | OM1    |        | OM2    |        | OM3    |        | D3T    |
|----------|---------------------|--------|--------|--------|--------|--------|--------|--------|--------|--------|--------|--------|--------|
|          |                     |        |        |        |        |        | D2     | D3     | D2     | D3     | D2     | D3     |        |
| gdb 45   | 1908.0 <sup>a</sup> | 1918.2 | 1901.3 | 1907.0 | 1911.8 | 1908.7 | 1896.4 | 1903.2 | 1903.2 | 1903.2 | 1902.9 | 1902.9 | 1902.9 |
| gdb 46   | 1905.9 <sup>a</sup> | 1918.5 | 1895.5 | 1905.6 | 1906.1 | 1904.4 | 1893.6 | 1898.3 | 1898.3 | 1898.3 | 1899.7 | 1899.6 | 1899.7 |
| gdb 47   | 1897.7 <sup>a</sup> | 1905.4 | 1883.1 | 1893.9 | 1898.5 | 1895.9 | 1879.4 | 1888.0 | 1888.0 | 1888.0 | 1885.9 | 1885.9 | 1885.9 |
| gdb 48   | 1901.8 <sup>a</sup> | 1913.5 | 1900.4 | 1903.3 | 1906.4 | 1903.1 | 1893.3 | 1897.5 | 1897.4 | 1897.4 | 1896.7 | 1896.6 | 1896.7 |
| gdb 49   | 1892.4 <sup>a</sup> | 1900.4 | 1882.0 | 1889.5 | 1893.0 | 1890.2 | 1876.0 | 1882.7 | 1882.7 | 1882.7 | 1879.6 | 1879.6 | 1879.6 |
| gdb 50   | 1905.4 <sup>a</sup> | 1913.4 | 1899.2 | 1901.8 | 1908.7 | 1904.1 | 1897.2 | 1899.5 | 1899.5 | 1899.5 | 1899.3 | 1899.3 | 1899.3 |
| gdb 51   | 1902.9 <sup>a</sup> | 1912.5 | 1894.3 | 1901.8 | 1902.4 | 1900.7 | 1893.3 | 1894.6 | 1894.6 | 1894.6 | 1896.2 | 1896.2 | 1896.2 |
| gdb 52   | 1898.2 <sup>a</sup> | 1903.2 | 1884.4 | 1893.3 | 1896.9 | 1894.3 | 1885.9 | 1890.2 | 1890.2 | 1890.2 | 1886.8 | 1886.7 | 1886.7 |
| gdb 53   | 1893.9 <sup>a</sup> | 1901.5 | 1885.7 | 1891.0 | 1895.2 | 1892.0 | 1882.9 | 1888.8 | 1888.8 | 1888.8 | 1885.2 | 1885.2 | 1885.2 |
| gdb 54   | 1905.8 <sup>a</sup> | 1913.3 | 1899.5 | 1902.0 | 1909.2 | 1904.5 | 1897.1 | 1899.6 | 1899.6 | 1899.6 | 1899.5 | 1899.5 | 1899.5 |
| gdb 55   | 1896.1 <sup>a</sup> | 1901.3 | 1880.9 | 1889.4 | 1895.6 | 1893.7 | 1883.7 | 1888.5 | 1888.5 | 1888.5 | 1886.6 | 1886.5 | 1886.5 |
| gdb 56   | 1894.2 <sup>a</sup> | 1901.7 | 1887.1 | 1891.5 | 1897.6 | 1894.0 | 1884.4 | 1890.3 | 1890.3 | 1890.3 | 1886.7 | 1886.7 | 1886.7 |
| gdb 57   | 1905.4 <sup>a</sup> | 1914.5 | 1899.4 | 1901.8 | 1909.1 | 1904.0 | 1897.4 | 1899.5 | 1899.5 | 1899.5 | 1899.4 | 1899.4 | 1899.4 |
| gdb 58   | 1902.8 <sup>a</sup> | 1913.5 | 1894.3 | 1901.9 | 1904.1 | 1901.6 | 1893.4 | 1894.6 | 1894.6 | 1894.6 | 1896.2 | 1896.2 | 1896.2 |
| gdb 59   | 1898.1 <sup>a</sup> | 1903.6 | 1884.9 | 1894.2 | 1899.0 | 1895.4 | 1885.9 | 1890.2 | 1890.2 | 1890.2 | 1886.7 | 1886.7 | 1886.7 |
| gdb 60   | 1893.6 <sup>a</sup> | 1902.7 | 1886.1 | 1891.1 | 1895.1 | 1891.6 | 1883.3 | 1889.1 | 1889.1 | 1889.1 | 1885.3 | 1885.3 | 1885.3 |
| gdb 61   | 1907.6 <sup>a</sup> | 1914.1 | 1899.9 | 1902.9 | 1909.9 | 1907.3 | 1899.0 | 1901.5 | 1901.5 | 1901.5 | 1902.5 | 1902.5 | 1902.5 |
| gdb 62   | 1900.2 <sup>a</sup> | 1903.3 | 1883.8 | 1892.6 | 1899.0 | 1896.6 | 1888.6 | 1892.3 | 1892.3 | 1892.3 | 1889.4 | 1889.4 | 1889.4 |
| gdb 63   | 1896.2 <sup>a</sup> | 1902.3 | 1884.9 | 1890.5 | 1896.1 | 1893.3 | 1886.1 | 1891.3 | 1891.3 | 1891.3 | 1888.0 | 1888.0 | 1888.0 |
| gdb 64   | 1905.7 <sup>a</sup> | 1914.7 | 1899.7 | 1902.1 | 1907.8 | 1904.5 | 1897.3 | 1899.5 | 1899.5 | 1899.5 | 1899.5 | 1899.5 | 1899.5 |
| gdb 65   | 1895.9 <sup>a</sup> | 1901.6 | 1881.2 | 1890.0 | 1897.8 | 1894.7 | 1883.3 | 1888.4 | 1888.4 | 1888.4 | 1886.4 | 1886.4 | 1886.4 |
| gdb 66   | 1894.9 <sup>a</sup> | 1903.0 | 1886.7 | 1891.8 | 1897.7 | 1892.7 | 1883.9 | 1889.5 | 1889.5 | 1889.5 | 1886.2 | 1886.2 | 1886.2 |
| gdb 67   | 1903.3 <sup>a</sup> | 1913.4 | 1901.9 | 1904.3 | 1908.0 | 1904.2 | 1892.7 | 1897.0 | 1897.0 | 1897.0 | 1896.9 | 1896.8 | 1896.8 |
| gdb 68   | 1895.7 <sup>a</sup> | 1900.7 | 1882.0 | 1889.9 | 1895.5 | 1892.8 | 1880.2 | 1885.3 | 1885.3 | 1885.3 | 1883.1 | 1883.1 | 1883.1 |
| gdb 69   | 1893.1 <sup>a</sup> | 1901.8 | 1887.2 | 1892.1 | 1895.7 | 1891.2 | 1880.5 | 1887.1 | 1887.0 | 1887.0 | 1883.2 | 1883.2 | 1883.2 |
| gdb 70   | 1894.8 <sup>a</sup> | 1897.4 | 1883.5 | 1890.3 | 1894.1 | 1891.3 | 1885.5 | 1886.7 | 1886.7 | 1886.7 | 1882.6 | 1882.6 | 1883.2 |
| gdb 71   | 1893.7 <sup>a</sup> | 1896.4 | 1883.5 | 1886.2 | 1892.2 | 1889.6 | 1886.6 | 1888.6 | 1888.6 | 1888.6 | 1885.0 | 1885.0 | 1885.0 |
| gdb 72   | 1893.7 <sup>a</sup> | 1897.1 | 1887.4 | 1888.3 | 1895.0 | 1890.9 | 1884.8 | 1887.5 | 1887.5 | 1887.5 | 1884.4 | 1884.4 | 1884.4 |
| gdb 73   | 1902.3 <sup>a</sup> | 1907.9 | 1899.6 | 1899.4 | 1904.5 | 1901.6 | 1895.4 | 1895.5 | 1895.5 | 1895.5 | 1896.4 | 1896.4 | 1896.4 |
| gdb 74   | 1890.4 <sup>a</sup> | 1895.7 | 1881.0 | 1886.3 | 1892.0 | 1888.9 | 1880.2 | 1882.6 | 1882.6 | 1882.6 | 1879.6 | 1879.6 | 1879.6 |
| gdb 75   | 1892.8 <sup>a</sup> | 1897.6 | 1886.1 | 1887.4 | 1893.7 | 1890.2 | 1885.3 | 1887.6 | 1887.6 | 1887.6 | 1883.8 | 1883.8 | 1883.8 |
| gdb 76   | 1891.5 <sup>a</sup> | 1897.6 | 1888.7 | 1889.2 | 1894.6 | 1889.7 | 1881.8 | 1885.3 | 1885.3 | 1885.3 | 1881.8 | 1881.8 | 1881.8 |
| gdb 77   | 1900.1 <sup>a</sup> | 1908.3 | 1901.0 | 1900.3 | 1904.1 | 1900.3 | 1892.5 | 1893.1 | 1893.1 | 1893.1 | 1893.8 | 1893.8 | 1893.8 |
| gdb 78   | 1863.7 <sup>a</sup> | 1871.7 | 1881.9 | 1869.7 | 1874.2 | 1867.6 | 1863.1 | 1865.6 | 1865.6 | 1865.6 | 1857.9 | 1857.8 | 1857.8 |
| gdb 79   | 1856.9 <sup>a</sup> | 1866.3 | 1875.8 | 1866.8 | 1870.2 | 1863.7 | 1856.0 | 1859.9 | 1859.9 | 1859.9 | 1854.6 | 1854.6 | 1854.6 |
| gdb 80   | 1865.3 <sup>a</sup> | 1872.5 | 1885.7 | 1871.7 | 1876.0 | 1868.8 | 1862.0 | 1865.1 | 1865.1 | 1865.1 | 1857.5 | 1857.5 | 1857.5 |
| gdb 81   | 1855.6 <sup>a</sup> | 1866.6 | 1874.3 | 1865.1 | 1868.0 | 1862.1 | 1856.6 | 1858.6 | 1858.6 | 1858.6 | 1853.1 | 1853.1 | 1853.1 |
| gdb 82   | 1855.7 <sup>a</sup> | 1866.9 | 1875.6 | 1865.5 | 1867.2 | 1861.7 | 1855.0 | 1856.0 | 1856.0 | 1856.0 | 1851.5 | 1851.5 | 1851.5 |
| gdb 83   | 1859.4 <sup>a</sup> | 1869.9 | 1876.6 | 1866.3 | 1870.6 | 1865.0 | 1860.6 | 1862.7 | 1862.7 | 1862.7 | 1854.7 | 1854.7 | 1854.7 |
| gdb 84   | 1868.4 <sup>a</sup> | 1876.5 | 1885.9 | 1874.2 | 1877.8 | 1870.2 | 1863.9 | 1867.7 | 1867.7 | 1867.7 | 1860.2 | 1860.2 | 1860.2 |
| gdb 85   | 1862.5 <sup>a</sup> | 1871.5 | 1879.6 | 1869.5 | 1871.7 | 1865.5 | 1858.2 | 1861.0 | 1861.0 | 1861.0 | 1856.4 | 1856.4 | 1856.4 |
| gdb 86   | 1866.5 <sup>a</sup> | 1875.8 | 1887.0 | 1875.3 | 1875.9 | 1868.8 | 1861.3 | 1865.8 | 1865.8 | 1865.8 | 1857.9 | 1857.9 | 1857.9 |
| gdb 87   | 1869.8 <sup>a</sup> | 1877.6 | 1885.0 | 1873.7 | 1878.0 | 1871.9 | 1867.3 | 1870.5 | 1870.5 | 1870.5 | 1862.8 | 1862.8 | 1862.8 |
| gdb 88   | 1864.3 <sup>a</sup> | 1881.3 | 1886.3 | 1876.2 | 1875.4 | 1868.7 | 1865.5 | 1869.3 | 1869.3 | 1869.3 | 1861.4 | 1861.4 | 1861.4 |
| gdb 89   | 1866.1 <sup>a</sup> | 1881.6 | 1885.7 | 1876.6 | 1877.2 | 1870.8 | 1868.2 | 1871.7 | 1871.7 | 1871.7 | 1863.9 | 1863.9 | 1863.9 |

... continued on next page ...

Table S26: . . . continued from previous page . . .

| Molecule | Ref.                | MNDO   | AMI    | PM3    | PM6    | PM7    | OM1    | OM2    |        | OM3    |        | D3T    |
|----------|---------------------|--------|--------|--------|--------|--------|--------|--------|--------|--------|--------|--------|
|          |                     |        |        |        |        |        |        | D2     | D3     | D2     | D3     |        |
| gdb 90   | 1865.3 <sup>a</sup> | 1880.0 | 1883.9 | 1875.1 | 1877.0 | 1870.2 | 1869.2 | 1871.5 | 1871.5 | 1863.6 | 1863.6 | 1863.6 |
| gdb 91   | 1855.1 <sup>a</sup> | 1872.5 | 1873.5 | 1866.2 | 1865.8 | 1860.6 | 1859.6 | 1860.0 | 1860.0 | 1854.8 | 1854.8 | 1854.8 |
| gdb 92   | 1840.0 <sup>a</sup> | 1860.6 | 1852.1 | 1850.1 | 1850.8 | 1844.3 | 1839.7 | 1837.5 | 1837.5 | 1832.2 | 1832.2 | 1832.2 |
| gdb 93   | 1837.5 <sup>a</sup> | 1858.2 | 1847.9 | 1847.6 | 1848.8 | 1841.5 | 1838.5 | 1835.0 | 1835.0 | 1829.8 | 1829.8 | 1829.8 |
| gdb 94   | 1835.6 <sup>a</sup> | 1858.3 | 1848.7 | 1847.3 | 1846.8 | 1839.4 | 1836.7 | 1832.7 | 1832.7 | 1827.8 | 1827.8 | 1827.8 |
| gdb 95   | 1838.9 <sup>a</sup> | 1844.7 | 1842.3 | 1836.9 | 1838.4 | 1835.8 | 1839.0 | 1836.6 | 1836.6 | 1829.0 | 1829.0 | 1829.0 |
| gdb 96   | 1836.4 <sup>a</sup> | 1843.5 | 1839.8 | 1835.8 | 1835.8 | 1833.4 | 1837.8 | 1834.3 | 1834.3 | 1827.4 | 1827.4 | 1827.4 |
| gdb 97   | 1831.6 <sup>a</sup> | 1816.8 | 1785.7 | 1802.2 | 1823.9 | 1810.3 | 1808.0 | 1813.5 | 1813.5 | 1807.5 | 1807.5 | 1807.5 |
| gdb 98   | 1842.0 <sup>a</sup> | 1844.4 | 1819.4 | 1829.8 | 1845.2 | 1836.6 | 1828.0 | 1827.0 | 1827.0 | 1823.0 | 1823.0 | 1823.0 |
| gdb 99   | 1840.1 <sup>a</sup> | 1845.2 | 1820.6 | 1830.2 | 1844.3 | 1835.2 | 1826.5 | 1824.9 | 1824.9 | 1820.7 | 1820.7 | 1820.7 |
| gdb 100  | 1847.8 <sup>a</sup> | 1847.4 | 1822.5 | 1833.6 | 1845.1 | 1841.1 | 1837.1 | 1837.7 | 1837.7 | 1829.4 | 1829.4 | 1829.4 |
| gdb 101  | 1832.3 <sup>a</sup> | 1843.1 | 1813.6 | 1826.8 | 1841.8 | 1831.4 | 1822.6 | 1820.8 | 1820.8 | 1819.6 | 1819.6 | 1819.6 |
| gdb 102  | 1870.0 <sup>a</sup> | 1881.1 | 1871.7 | 1870.4 | 1877.0 | 1873.4 | 1869.5 | 1870.9 | 1870.9 | 1864.5 | 1864.5 | 1864.5 |
| gdb 103  | 1826.4 <sup>a</sup> | 1813.6 | 1786.7 | 1799.9 | 1820.3 | 1807.5 | 1807.6 | 1810.2 | 1810.2 | 1804.4 | 1804.4 | 1804.4 |
| gdb 104  | 1820.2 <sup>a</sup> | 1814.2 | 1781.9 | 1797.7 | 1817.8 | 1804.4 | 1804.4 | 1806.5 | 1806.5 | 1802.4 | 1802.4 | 1802.4 |
| gdb 105  | 1838.1 <sup>a</sup> | 1842.4 | 1821.0 | 1829.0 | 1842.5 | 1833.9 | 1827.4 | 1823.7 | 1823.7 | 1819.4 | 1819.4 | 1819.4 |
| gdb 106  | 1831.0 <sup>a</sup> | 1841.2 | 1815.6 | 1826.3 | 1841.9 | 1831.7 | 1824.5 | 1819.0 | 1819.0 | 1817.9 | 1817.9 | 1817.9 |
| gdb 107  | 1844.5 <sup>a</sup> | 1842.8 | 1823.4 | 1831.9 | 1842.7 | 1838.6 | 1836.7 | 1836.1 | 1836.1 | 1827.5 | 1827.5 | 1827.5 |
| gdb 108  | 1841.9 <sup>a</sup> | 1840.8 | 1820.2 | 1829.1 | 1844.8 | 1836.4 | 1830.2 | 1828.0 | 1828.0 | 1823.6 | 1823.6 | 1823.6 |
| gdb 109  | 1839.2 <sup>a</sup> | 1843.1 | 1819.9 | 1830.4 | 1844.7 | 1838.6 | 1836.5 | 1835.0 | 1835.0 | 1828.8 | 1828.8 | 1828.8 |
| gdb 110  | 1870.4 <sup>a</sup> | 1874.8 | 1868.5 | 1866.9 | 1875.6 | 1872.5 | 1870.8 | 1871.6 | 1871.6 | 1864.9 | 1864.9 | 1864.9 |
| gdb 111  | 1871.1 <sup>a</sup> | 1879.6 | 1870.7 | 1870.0 | 1881.7 | 1875.5 | 1873.8 | 1874.9 | 1874.9 | 1868.2 | 1868.2 | 1868.2 |
| gdb 112  | 1841.0 <sup>a</sup> | 1873.7 | 1832.7 | 1852.4 | 1861.4 | 1849.5 | 1831.5 | 1829.1 | 1829.1 | 1827.4 | 1827.4 | 1827.4 |
| gdb 113  | 1841.7 <sup>a</sup> | 1876.1 | 1837.6 | 1854.3 | 1865.4 | 1851.5 | 1835.5 | 1833.2 | 1833.2 | 1830.3 | 1830.3 | 1830.3 |
| gdb 114  | 1839.0 <sup>a</sup> | 1877.0 | 1841.1 | 1855.0 | 1865.5 | 1850.7 | 1836.3 | 1834.9 | 1834.9 | 1830.4 | 1830.4 | 1830.4 |
| gdb 115  | 1850.3 <sup>a</sup> | 1879.7 | 1841.4 | 1858.6 | 1864.7 | 1856.4 | 1844.3 | 1844.8 | 1844.8 | 1837.1 | 1837.1 | 1837.1 |
| gdb 116  | 1856.3 <sup>a</sup> | 1868.0 | 1847.4 | 1856.3 | 1866.1 | 1857.0 | 1841.4 | 1846.8 | 1846.8 | 1845.3 | 1845.3 | 1845.3 |
| gdb 117  | 1864.4 <sup>a</sup> | 1874.6 | 1859.9 | 1863.4 | 1876.6 | 1864.9 | 1850.9 | 1857.5 | 1857.5 | 1851.8 | 1851.8 | 1851.8 |
| gdb 118  | 1858.5 <sup>a</sup> | 1864.3 | 1843.4 | 1852.7 | 1864.8 | 1854.3 | 1839.4 | 1843.1 | 1843.1 | 1842.4 | 1842.4 | 1842.4 |
| gdb 119  | 1860.0 <sup>a</sup> | 1865.8 | 1849.0 | 1855.6 | 1870.8 | 1858.7 | 1843.2 | 1846.4 | 1846.4 | 1844.8 | 1844.8 | 1844.8 |
| gdb 120  | 1859.1 <sup>a</sup> | 1865.7 | 1848.7 | 1855.2 | 1869.4 | 1857.6 | 1842.4 | 1845.8 | 1845.8 | 1844.0 | 1844.0 | 1844.0 |
| gdb 121  | 1866.1 <sup>a</sup> | 1868.3 | 1849.8 | 1858.1 | 1868.5 | 1862.5 | 1851.3 | 1857.3 | 1857.3 | 1851.0 | 1851.0 | 1851.0 |
| gdb 122  | 1881.1 <sup>a</sup> | 1890.0 | 1877.9 | 1879.6 | 1888.2 | 1879.2 | 1871.4 | 1879.7 | 1879.7 | 1874.9 | 1874.6 | 1874.6 |
| gdb 123  | 1877.0 <sup>a</sup> | 1885.9 | 1873.0 | 1877.0 | 1886.1 | 1877.4 | 1869.1 | 1876.3 | 1876.3 | 1874.3 | 1874.3 | 1874.3 |
| gdb 124  | 1879.9 <sup>a</sup> | 1887.4 | 1878.0 | 1879.1 | 1888.4 | 1878.8 | 1871.8 | 1879.4 | 1879.4 | 1876.0 | 1876.0 | 1876.0 |
| gdb 125  | 1882.7 <sup>a</sup> | 1888.5 | 1883.1 | 1881.3 | 1891.3 | 1880.4 | 1874.9 | 1882.5 | 1882.5 | 1878.1 | 1878.1 | 1878.1 |
| gdb 126  | 1888.6 <sup>a</sup> | 1886.8 | 1875.3 | 1878.8 | 1884.4 | 1880.8 | 1876.4 | 1882.9 | 1882.9 | 1876.4 | 1876.4 | 1876.4 |
| gdb 127  | 1886.4 <sup>a</sup> | 1881.3 | 1887.3 | 1881.1 | 1897.9 | 1888.5 | 1878.1 | 1888.2 | 1888.2 | 1879.6 | 1879.6 | 1879.6 |
| gdb 128  | 1886.2 <sup>a</sup> | 1882.7 | 1883.3 | 1879.5 | 1893.7 | 1886.5 | 1877.7 | 1885.8 | 1885.8 | 1880.3 | 1880.3 | 1880.3 |
| gdb 129  | 1892.7 <sup>a</sup> | 1888.7 | 1890.8 | 1885.9 | 1901.9 | 1892.8 | 1884.4 | 1894.0 | 1894.0 | 1885.5 | 1885.5 | 1885.5 |
| gdb 130  | 1886.3 <sup>a</sup> | 1877.8 | 1879.4 | 1876.9 | 1887.0 | 1883.0 | 1876.7 | 1883.1 | 1883.1 | 1875.1 | 1875.1 | 1875.1 |
| gdb 131  | 1886.2 <sup>a</sup> | 1877.5 | 1879.9 | 1877.1 | 1885.3 | 1881.9 | 1876.5 | 1882.2 | 1882.2 | 1874.4 | 1874.4 | 1874.4 |
| gdb 132  | 1889.5 <sup>a</sup> | 1882.1 | 1879.0 | 1877.8 | 1887.1 | 1884.6 | 1878.8 | 1885.4 | 1885.4 | 1877.2 | 1877.2 | 1877.2 |
| gdb 133  | 1880.8 <sup>a</sup> | 1879.9 | 1885.9 | 1879.1 | 1894.3 | 1887.1 | 1876.4 | 1885.2 | 1885.2 | 1879.1 | 1879.1 | 1879.1 |
| gdb 134  | 1885.7 <sup>a</sup> | 1885.6 | 1893.6 | 1885.1 | 1899.9 | 1891.3 | 1881.9 | 1891.2 | 1891.2 | 1882.7 | 1882.7 | 1882.7 |

. . . continued on next page . . .

Table S26: ... continued from previous page. ...

| Molecule | Ref.                | MNDO   | AMI    | PM3    | PM6    | PM7    | OM1    | OM2    |        | OM3    |        | D3T    |
|----------|---------------------|--------|--------|--------|--------|--------|--------|--------|--------|--------|--------|--------|
|          |                     |        |        |        |        |        |        | D2     | D3     | D2     | D3     |        |
| gdb 135  | 1885.7 <sup>a</sup> | 1880.1 | 1883.6 | 1878.3 | 1888.9 | 1885.9 | 1880.9 | 1886.0 | 1886.0 | 1878.3 | 1878.3 | 1878.3 |
| gdb 136  | 1859.0 <sup>a</sup> | 1875.1 | 1861.4 | 1864.5 | 1876.1 | 1866.2 | 1856.4 | 1859.6 | 1859.6 | 1854.7 | 1854.7 | 1854.7 |
| gdb 137  | 1863.1 <sup>a</sup> | 1879.6 | 1870.6 | 1870.1 | 1882.3 | 1870.0 | 1859.8 | 1863.3 | 1863.3 | 1856.0 | 1856.0 | 1856.0 |
| gdb 138  | 1861.8 <sup>a</sup> | 1870.7 | 1858.2 | 1861.0 | 1870.7 | 1863.1 | 1855.8 | 1856.9 | 1856.9 | 1850.8 | 1850.8 | 1850.8 |
| gdb 139  | 1862.4 <sup>a</sup> | 1871.8 | 1856.6 | 1860.9 | 1870.5 | 1863.7 | 1858.4 | 1859.7 | 1859.7 | 1852.8 | 1852.8 | 1852.8 |
| gdb 140  | 1886.7 <sup>a</sup> | 1893.9 | 1895.4 | 1889.6 | 1902.0 | 1891.8 | 1881.2 | 1885.5 | 1885.5 | 1879.3 | 1879.3 | 1879.3 |
| gdb 141  | 1888.4 <sup>a</sup> | 1897.1 | 1896.6 | 1890.7 | 1904.8 | 1894.8 | 1885.1 | 1888.8 | 1888.8 | 1883.4 | 1883.4 | 1883.4 |
| gdb 142  | 1882.8 <sup>a</sup> | 1891.4 | 1889.6 | 1885.4 | 1897.8 | 1888.5 | 1879.1 | 1881.9 | 1881.9 | 1878.6 | 1878.6 | 1878.6 |
| gdb 143  | 1880.3 <sup>a</sup> | 1890.3 | 1886.6 | 1884.2 | 1895.2 | 1886.9 | 1877.5 | 1879.9 | 1879.9 | 1876.6 | 1876.6 | 1876.6 |
| gdb 144  | 1884.8 <sup>a</sup> | 1896.4 | 1891.8 | 1887.7 | 1899.5 | 1890.2 | 1880.6 | 1884.3 | 1884.3 | 1879.2 | 1879.1 | 1879.1 |
| gdb 145  | 1865.6 <sup>a</sup> | 1877.9 | 1868.8 | 1867.0 | 1882.1 | 1868.6 | 1858.5 | 1860.6 | 1860.6 | 1853.9 | 1853.9 | 1853.9 |
| gdb 146  | 1862.4 <sup>a</sup> | 1872.4 | 1860.1 | 1863.3 | 1876.2 | 1864.8 | 1853.6 | 1855.3 | 1855.3 | 1851.8 | 1851.8 | 1851.8 |
| gdb 147  | 1866.6 <sup>a</sup> | 1878.1 | 1868.2 | 1867.3 | 1879.9 | 1867.3 | 1857.7 | 1859.1 | 1859.1 | 1853.0 | 1853.0 | 1853.0 |
| gdb 148  | 1856.9 <sup>a</sup> | 1865.6 | 1852.3 | 1854.6 | 1870.0 | 1858.3 | 1845.4 | 1844.4 | 1844.4 | 1842.3 | 1842.3 | 1842.3 |
| gdb 149  | 1860.2 <sup>a</sup> | 1868.4 | 1853.2 | 1856.2 | 1871.1 | 1858.5 | 1848.1 | 1845.7 | 1845.7 | 1844.3 | 1844.3 | 1844.3 |
| gdb 150  | 1859.8 <sup>a</sup> | 1867.8 | 1850.6 | 1855.3 | 1868.0 | 1856.9 | 1845.7 | 1843.8 | 1843.8 | 1842.3 | 1842.3 | 1842.3 |
| gdb 151  | 1852.1 <sup>a</sup> | 1849.4 | 1829.5 | 1833.8 | 1852.5 | 1837.0 | 1832.5 | 1836.9 | 1836.9 | 1831.2 | 1831.2 | 1831.2 |
| gdb 152  | 1846.5 <sup>a</sup> | 1844.8 | 1820.6 | 1829.9 | 1844.3 | 1830.5 | 1825.9 | 1830.1 | 1830.1 | 1826.1 | 1826.1 | 1826.1 |
| gdb 153  | 1838.6 <sup>a</sup> | 1838.3 | 1818.5 | 1824.7 | 1846.8 | 1829.4 | 1823.5 | 1827.2 | 1827.2 | 1823.8 | 1823.8 | 1823.8 |
| gdb 154  | 1841.8 <sup>a</sup> | 1839.7 | 1817.9 | 1825.2 | 1846.0 | 1830.0 | 1825.6 | 1829.5 | 1829.5 | 1825.2 | 1825.2 | 1825.2 |
| gdb 155  | 1842.9 <sup>a</sup> | 1855.3 | 1827.7 | 1840.4 | 1856.2 | 1843.8 | 1830.3 | 1828.0 | 1828.0 | 1825.1 | 1825.1 | 1825.0 |
| gdb 156  | 1840.6 <sup>a</sup> | 1855.3 | 1828.8 | 1840.4 | 1855.2 | 1842.4 | 1828.8 | 1826.1 | 1826.0 | 1823.4 | 1823.4 | 1823.4 |
| gdb 157  | 1846.1 <sup>a</sup> | 1857.3 | 1831.5 | 1843.6 | 1855.3 | 1846.9 | 1837.7 | 1836.9 | 1836.9 | 1830.1 | 1830.1 | 1830.1 |
| gdb 158  | 1842.8 <sup>a</sup> | 1857.4 | 1832.5 | 1843.3 | 1853.6 | 1845.0 | 1835.5 | 1834.3 | 1834.3 | 1827.8 | 1827.8 | 1827.8 |
| gdb 159  | 1875.5 <sup>a</sup> | 1866.9 | 1854.4 | 1861.0 | 1875.5 | 1864.2 | 1857.2 | 1868.1 | 1868.1 | 1861.9 | 1861.9 | 1861.9 |
| gdb 160  | 1869.7 <sup>a</sup> | 1864.6 | 1853.4 | 1859.2 | 1874.0 | 1861.9 | 1852.9 | 1864.5 | 1864.5 | 1859.8 | 1859.8 | 1859.8 |
| gdb 161  | 1872.3 <sup>a</sup> | 1864.6 | 1848.9 | 1858.5 | 1872.4 | 1861.0 | 1854.0 | 1865.1 | 1865.1 | 1860.7 | 1860.7 | 1860.7 |
| gdb 162  | 1877.2 <sup>a</sup> | 1872.4 | 1857.4 | 1864.0 | 1873.7 | 1863.0 | 1858.9 | 1870.1 | 1870.1 | 1862.9 | 1862.9 | 1862.9 |
| gdb 163  | 1876.9 <sup>a</sup> | 1871.5 | 1857.3 | 1863.7 | 1878.5 | 1867.8 | 1860.3 | 1872.2 | 1872.2 | 1866.1 | 1866.0 | 1866.0 |
| gdb 164  | 1877.6 <sup>a</sup> | 1871.9 | 1855.5 | 1863.5 | 1877.7 | 1867.9 | 1861.7 | 1872.9 | 1872.9 | 1866.9 | 1866.9 | 1866.9 |
| gdb 165  | 1854.0 <sup>a</sup> | 1844.4 | 1823.7 | 1829.8 | 1848.3 | 1832.2 | 1826.3 | 1834.4 | 1834.4 | 1828.4 | 1828.4 | 1828.4 |
| gdb 166  | 1852.3 <sup>a</sup> | 1839.7 | 1813.3 | 1825.1 | 1839.7 | 1825.7 | 1821.6 | 1828.1 | 1828.1 | 1825.6 | 1825.5 | 1825.5 |
| gdb 167  | 1853.3 <sup>a</sup> | 1842.8 | 1821.0 | 1829.5 | 1846.7 | 1829.6 | 1823.0 | 1831.9 | 1831.9 | 1826.1 | 1826.1 | 1826.1 |
| gdb 168  | 1847.2 <sup>a</sup> | 1833.5 | 1810.2 | 1822.0 | 1842.7 | 1827.2 | 1821.2 | 1828.6 | 1828.6 | 1825.1 | 1825.1 | 1825.1 |
| gdb 169  | 1843.5 <sup>a</sup> | 1831.6 | 1811.7 | 1822.9 | 1845.4 | 1827.8 | 1818.5 | 1827.6 | 1827.6 | 1823.7 | 1823.7 | 1823.7 |
| gdb 170  | 1842.4 <sup>a</sup> | 1831.7 | 1811.4 | 1822.7 | 1843.5 | 1826.4 | 1817.9 | 1826.6 | 1826.6 | 1822.7 | 1822.7 | 1822.7 |
| gdb 171  | 1870.7 <sup>a</sup> | 1859.0 | 1850.0 | 1863.8 | 1885.2 | 1873.9 | 1860.3 | 1865.6 | 1865.6 | 1859.6 | 1859.6 | 1859.6 |
| gdb 172  | 1879.7 <sup>a</sup> | 1869.9 | 1857.7 | 1874.1 | 1889.3 | 1879.5 | 1869.5 | 1885.0 | 1885.0 | 1874.7 | 1874.7 | 1874.7 |
| gdb 173  | 1873.4 <sup>a</sup> | 1861.0 | 1863.7 | 1864.8 | 1880.3 | 1871.7 | 1860.1 | 1873.0 | 1873.0 | 1865.4 | 1865.4 | 1865.4 |
| gdb 174  | 1882.2 <sup>a</sup> | 1868.5 | 1868.4 | 1868.5 | 1887.6 | 1881.1 | 1870.6 | 1882.2 | 1882.2 | 1874.8 | 1874.8 | 1874.8 |
| gdb 175  | 1886.5 <sup>a</sup> | 1885.8 | 1877.4 | 1879.5 | 1886.9 | 1877.4 | 1873.7 | 1883.8 | 1883.8 | 1874.7 | 1874.7 | 1874.7 |
| gdb 176  | 1879.5 <sup>a</sup> | 1878.7 | 1867.8 | 1871.8 | 1883.8 | 1873.4 | 1867.6 | 1876.4 | 1876.4 | 1870.5 | 1870.4 | 1870.4 |
| gdb 177  | 1881.7 <sup>a</sup> | 1880.3 | 1867.2 | 1884.3 | 1875.0 | 1869.9 | 1878.4 | 1878.4 | 1878.4 | 1872.3 | 1872.3 | 1872.3 |
| gdb 178  | 1856.1 <sup>a</sup> | 1855.1 | 1829.8 | 1839.1 | 1853.6 | 1838.4 | 1835.7 | 1845.4 | 1845.4 | 1838.6 | 1838.5 | 1838.5 |
| gdb 179  | 1845.7 <sup>a</sup> | 1844.8 | 1817.5 | 1830.6 | 1847.0 | 1832.8 | 1830.1 | 1838.1 | 1838.1 | 1832.8 | 1832.8 | 1832.8 |

... continued on next page ...

Table S26: ... continued from previous page ...

| Molecule | Ref.                | MNDO   | AMI    | PM3    | PM6    | PM7    | OM1    |        | OM2    |        | OM3    |        | D3T    |
|----------|---------------------|--------|--------|--------|--------|--------|--------|--------|--------|--------|--------|--------|--------|
|          |                     |        |        |        |        |        | OM1    | OM2    | D2     | D3     | D3T    | D2     |        |
| gdb 180  | 1844.2 <sup>a</sup> | 1842.7 | 1819.9 | 1831.0 | 1849.2 | 1832.9 | 1828.9 | 1836.5 | 1836.5 | 1836.5 | 1832.0 | 1832.0 | 1832.0 |
| gdb 181  | 1865.2 <sup>a</sup> | 1885.8 | 1876.5 | 1875.5 | 1883.7 | 1876.4 | 1863.2 | 1862.4 | 1862.3 | 1862.3 | 1857.5 | 1857.5 | 1857.5 |
| gdb 182  | 1865.0 <sup>a</sup> | 1883.0 | 1863.7 | 1871.3 | 1882.0 | 1871.9 | 1862.0 | 1866.0 | 1866.0 | 1866.0 | 1861.5 | 1861.5 | 1861.5 |
| gdb 183  | 1872.8 <sup>a</sup> | 1879.8 | 1862.9 | 1871.6 | 1881.7 | 1874.9 | 1866.6 | 1869.6 | 1869.6 | 1869.6 | 1862.8 | 1862.8 | 1862.8 |
| gdb 184  | 1870.7 <sup>a</sup> | 1879.8 | 1864.3 | 1871.0 | 1877.4 | 1870.1 | 1863.1 | 1865.5 | 1865.5 | 1865.5 | 1858.8 | 1858.8 | 1858.8 |
| gdb 185  | 1868.1 <sup>a</sup> | 1883.8 | 1867.8 | 1871.2 | 1881.7 | 1870.6 | 1863.9 | 1871.2 | 1871.2 | 1871.2 | 1863.2 | 1863.0 | 1863.0 |
| gdb 186  | 1865.5 <sup>a</sup> | 1873.4 | 1854.1 | 1862.8 | 1870.4 | 1864.9 | 1860.2 | 1864.8 | 1864.8 | 1864.8 | 1857.4 | 1857.4 | 1857.4 |
| gdb 187  | 1863.3 <sup>a</sup> | 1871.7 | 1856.7 | 1863.4 | 1871.6 | 1864.0 | 1857.8 | 1862.7 | 1862.7 | 1862.7 | 1855.7 | 1855.7 | 1855.7 |
| gdb 188  | 1870.1 <sup>a</sup> | 1852.8 | 1861.1 | 1854.9 | 1874.9 | 1863.7 | 1852.1 | 1856.2 | 1856.2 | 1856.2 | 1853.1 | 1853.1 | 1853.1 |
| gdb 189  | 1875.3 <sup>a</sup> | 1880.2 | 1864.1 | 1867.1 | 1881.9 | 1873.8 | 1866.4 | 1864.8 | 1864.8 | 1864.8 | 1859.5 | 1859.4 | 1859.4 |
| gdb 190  | 1855.0 <sup>a</sup> | 1873.7 | 1862.1 | 1869.0 | 1884.1 | 1872.6 | 1857.2 | 1860.2 | 1860.2 | 1860.2 | 1856.3 | 1856.3 | 1856.3 |
| gdb 191  | 1911.8 <sup>a</sup> | 1902.3 | 1909.3 | 1906.2 | 1920.2 | 1913.8 | 1903.0 | 1917.1 | 1917.1 | 1917.1 | 1910.2 | 1910.2 | 1910.2 |
| gdb 192  | 1915.6 <sup>a</sup> | 1908.2 | 1917.0 | 1912.6 | 1923.2 | 1915.7 | 1906.3 | 1921.4 | 1921.4 | 1921.4 | 1911.7 | 1911.7 | 1911.7 |
| gdb 193  | 1914.3 <sup>a</sup> | 1909.8 | 1919.0 | 1914.4 | 1923.2 | 1915.7 | 1906.6 | 1922.1 | 1922.1 | 1922.1 | 1912.0 | 1912.0 | 1912.0 |
| gdb 194  | 1911.3 <sup>a</sup> | 1902.0 | 1912.5 | 1907.6 | 1920.8 | 1913.6 | 1902.3 | 1917.5 | 1917.5 | 1917.5 | 1908.2 | 1908.2 | 1908.2 |
| gdb 195  | 1868.2 <sup>a</sup> | 1867.3 | 1865.2 | 1863.5 | 1879.9 | 1870.9 | 1858.3 | 1868.1 | 1868.1 | 1868.1 | 1862.5 | 1862.5 | 1862.5 |
| gdb 196  | 1872.6 <sup>a</sup> | 1873.6 | 1867.0 | 1866.2 | 1881.4 | 1873.7 | 1863.2 | 1872.7 | 1872.7 | 1872.7 | 1868.0 | 1867.9 | 1867.9 |
| gdb 197  | 1878.8 <sup>a</sup> | 1879.7 | 1875.0 | 1873.4 | 1890.2 | 1881.0 | 1869.4 | 1880.4 | 1880.4 | 1880.4 | 1873.2 | 1873.2 | 1873.2 |
| gdb 198  | 1864.5 <sup>a</sup> | 1858.9 | 1856.4 | 1858.3 | 1868.5 | 1863.3 | 1855.4 | 1862.4 | 1862.4 | 1862.4 | 1856.9 | 1856.9 | 1856.9 |
| gdb 199  | 1866.6 <sup>a</sup> | 1859.7 | 1856.7 | 1859.6 | 1872.9 | 1867.1 | 1856.8 | 1864.3 | 1864.3 | 1864.3 | 1859.1 | 1859.0 | 1859.0 |
| gdb 200  | 1871.2 <sup>a</sup> | 1869.1 | 1869.2 | 1867.1 | 1884.0 | 1873.3 | 1860.6 | 1870.2 | 1870.2 | 1870.2 | 1864.7 | 1864.7 | 1864.7 |
| gdb 201  | 1865.3 <sup>a</sup> | 1863.5 | 1862.6 | 1861.5 | 1876.1 | 1866.7 | 1855.0 | 1864.4 | 1864.4 | 1864.4 | 1860.9 | 1860.9 | 1860.9 |
| gdb 202  | 1864.4 <sup>a</sup> | 1862.3 | 1858.1 | 1859.6 | 1874.5 | 1865.6 | 1853.5 | 1861.4 | 1861.4 | 1861.4 | 1859.7 | 1859.7 | 1859.7 |
| gdb 203  | 1877.3 <sup>a</sup> | 1878.8 | 1870.9 | 1871.0 | 1885.8 | 1876.7 | 1865.4 | 1876.6 | 1876.6 | 1876.6 | 1870.1 | 1870.1 | 1870.1 |
| gdb 204  | 1887.3 <sup>a</sup> | 1903.6 | 1898.3 | 1898.7 | 1907.0 | 1898.7 | 1885.9 | 1893.7 | 1893.7 | 1893.7 | 1887.5 | 1887.5 | 1887.5 |
| gdb 205  | 1895.1 <sup>a</sup> | 1909.2 | 1905.9 | 1903.8 | 1914.4 | 1905.2 | 1894.2 | 1902.2 | 1902.2 | 1902.2 | 1893.8 | 1893.8 | 1893.8 |
| gdb 206  | 1896.2 <sup>a</sup> | 1910.2 | 1906.1 | 1904.8 | 1915.0 | 1905.5 | 1894.7 | 1904.2 | 1904.2 | 1904.2 | 1895.4 | 1895.4 | 1895.4 |
| gdb 207  | 1895.8 <sup>a</sup> | 1904.3 | 1904.0 | 1901.7 | 1913.8 | 1903.6 | 1891.4 | 1901.2 | 1901.2 | 1901.2 | 1892.7 | 1892.7 | 1892.7 |
| gdb 208  | 1890.0 <sup>a</sup> | 1899.3 | 1897.4 | 1897.2 | 1909.3 | 1900.3 | 1886.9 | 1895.8 | 1895.8 | 1895.8 | 1890.0 | 1890.0 | 1890.0 |
| gdb 209  | 1896.6 <sup>a</sup> | 1904.4 | 1895.6 | 1897.0 | 1907.7 | 1899.4 | 1888.5 | 1894.1 | 1894.1 | 1894.1 | 1888.9 | 1888.9 | 1888.9 |
| gdb 210  | 1891.9 <sup>a</sup> | 1899.5 | 1894.5 | 1895.1 | 1905.8 | 1896.7 | 1884.4 | 1890.4 | 1890.4 | 1890.4 | 1885.4 | 1885.4 | 1885.4 |
| gdb 211  | 1891.5 <sup>a</sup> | 1897.5 | 1897.0 | 1892.0 | 1905.8 | 1896.3 | 1889.4 | 1897.4 | 1897.4 | 1897.4 | 1889.0 | 1889.0 | 1889.0 |
| gdb 212  | 1892.0 <sup>a</sup> | 1897.5 | 1897.2 | 1892.0 | 1906.1 | 1896.8 | 1889.5 | 1897.1 | 1897.1 | 1897.1 | 1889.1 | 1889.1 | 1889.1 |
| gdb 213  | 1886.4 <sup>a</sup> | 1888.1 | 1890.8 | 1887.3 | 1901.5 | 1891.8 | 1880.7 | 1888.4 | 1888.4 | 1888.4 | 1881.7 | 1881.7 | 1881.7 |
| gdb 214  | 1890.2 <sup>a</sup> | 1894.0 | 1893.6 | 1890.0 | 1905.9 | 1897.7 | 1887.5 | 1894.4 | 1894.4 | 1894.4 | 1887.2 | 1887.2 | 1887.2 |
| gdb 215  | 1882.7 <sup>a</sup> | 1883.5 | 1884.2 | 1883.0 | 1897.8 | 1889.2 | 1877.4 | 1884.9 | 1884.9 | 1884.9 | 1880.4 | 1880.4 | 1880.4 |
| gdb 216  | 1890.9 <sup>a</sup> | 1890.5 | 1886.3 | 1884.8 | 1893.7 | 1890.9 | 1885.6 | 1889.9 | 1889.9 | 1889.9 | 1882.3 | 1882.3 | 1882.3 |
| gdb 217  | 1892.1 <sup>a</sup> | 1887.0 | 1887.0 | 1883.6 | 1894.7 | 1890.0 | 1885.3 | 1889.9 | 1889.9 | 1889.9 | 1882.8 | 1882.8 | 1882.8 |
| gdb 218  | 1890.5 <sup>a</sup> | 1886.9 | 1886.5 | 1883.1 | 1893.7 | 1888.9 | 1884.5 | 1889.4 | 1889.4 | 1889.4 | 1881.9 | 1881.9 | 1881.9 |
| gdb 219  | 1887.7 <sup>a</sup> | 1893.9 | 1891.9 | 1891.5 | 1901.5 | 1893.7 | 1880.7 | 1889.9 | 1889.9 | 1889.9 | 1883.7 | 1883.7 | 1883.7 |
| gdb 220  | 1891.9 <sup>a</sup> | 1899.4 | 1900.1 | 1897.2 | 1909.6 | 1899.5 | 1886.8 | 1897.2 | 1897.2 | 1897.2 | 1888.6 | 1888.6 | 1888.6 |
| gdb 221  | 1891.3 <sup>a</sup> | 1897.2 | 1895.2 | 1893.0 | 1908.4 | 1899.3 | 1886.4 | 1896.4 | 1896.4 | 1896.4 | 1888.1 | 1888.1 | 1888.1 |
| gdb 222  | 1891.9 <sup>a</sup> | 1895.0 | 1891.5 | 1901.8 | 1901.8 | 1892.9 | 1881.3 | 1889.2 | 1889.2 | 1889.2 | 1883.1 | 1883.1 | 1883.1 |
| gdb 223  | 1891.2 <sup>a</sup> | 1894.5 | 1890.5 | 1890.5 | 1905.5 | 1895.6 | 1882.6 | 1890.5 | 1890.5 | 1890.5 | 1884.9 | 1884.9 | 1884.9 |
| gdb 224  | 1900.2 <sup>a</sup> | 1887.1 | 1898.7 | 1893.6 | 1904.7 | 1898.2 | 1889.2 | 1904.5 | 1904.5 | 1904.5 | 1894.5 | 1894.5 | 1894.5 |

... continued on next page ...



Table S26: ... continued from previous page. ...

| Molecule | Ref.                | MNDO   | AMI    | PM3    | PM6    | PM7    | OM1    |        | OM2    |        | OM3    |        | D3T    |
|----------|---------------------|--------|--------|--------|--------|--------|--------|--------|--------|--------|--------|--------|--------|
|          |                     |        |        |        |        |        | D2     | D3     | D2     | D3     | D2     | D3     |        |
| gdb 225  | 1892.6 <sup>a</sup> | 1881.2 | 1890.0 | 1886.5 | 1897.7 | 1892.2 | 1881.0 | 1895.9 | 1895.9 | 1888.3 | 1888.3 | 1888.3 | 1888.3 |
| gdb 226  | 1902.4 <sup>a</sup> | 1892.0 | 1900.4 | 1897.6 | 1907.2 | 1899.9 | 1892.1 | 1909.0 | 1909.0 | 1897.8 | 1897.8 | 1897.8 | 1897.8 |
| gdb 227  | 1894.9 <sup>a</sup> | 1880.3 | 1889.6 | 1886.3 | 1900.9 | 1894.7 | 1883.9 | 1899.0 | 1899.0 | 1891.7 | 1891.7 | 1891.7 | 1891.7 |
| gdb 228  | 1900.3 <sup>a</sup> | 1884.8 | 1890.1 | 1887.7 | 1902.8 | 1888.2 | 1888.2 | 1902.6 | 1902.6 | 1895.2 | 1895.2 | 1895.2 | 1895.2 |
| gdb 229  | 1865.8 <sup>a</sup> | 1886.5 | 1867.1 | 1870.3 | 1885.1 | 1873.2 | 1865.5 | 1863.3 | 1863.3 | 1859.6 | 1859.6 | 1859.6 | 1859.5 |
| gdb 230  | 1859.9 <sup>a</sup> | 1887.6 | 1868.8 | 1874.8 | 1885.1 | 1876.9 | 1864.2 | 1865.0 | 1865.0 | 1861.3 | 1861.3 | 1861.3 | 1861.3 |
| gdb 231  | 1864.9 <sup>a</sup> | 1867.5 | 1853.5 | 1856.1 | 1868.5 | 1860.9 | 1854.8 | 1854.0 | 1854.0 | 1848.4 | 1848.4 | 1848.3 | 1848.3 |
| gdb 232  | 1870.5 <sup>a</sup> | 1901.9 | 1889.2 | 1892.1 | 1902.3 | 1889.7 | 1871.6 | 1876.8 | 1876.8 | 1868.1 | 1868.1 | 1868.1 | 1868.1 |
| gdb 233  | 1871.3 <sup>a</sup> | 1894.4 | 1876.9 | 1882.1 | 1891.1 | 1880.2 | 1865.3 | 1867.0 | 1867.0 | 1862.2 | 1862.2 | 1862.2 | 1862.2 |
| gdb 234  | 1872.8 <sup>a</sup> | 1894.6 | 1877.2 | 1883.7 | 1895.8 | 1883.7 | 1867.3 | 1869.9 | 1869.9 | 1864.9 | 1864.9 | 1864.9 | 1864.9 |
| gdb 235  | 1885.5 <sup>a</sup> | 1883.3 | 1878.1 | 1878.1 | 1889.7 | 1880.5 | 1872.1 | 1881.5 | 1881.5 | 1873.0 | 1873.0 | 1873.0 | 1873.0 |
| gdb 236  | 1878.8 <sup>a</sup> | 1877.3 | 1868.0 | 1871.3 | 1886.5 | 1875.8 | 1866.4 | 1875.0 | 1875.0 | 1869.4 | 1869.4 | 1869.4 | 1869.4 |
| gdb 237  | 1880.4 <sup>a</sup> | 1876.4 | 1868.2 | 1870.4 | 1885.3 | 1874.2 | 1865.4 | 1874.2 | 1874.2 | 1868.6 | 1868.6 | 1868.6 | 1868.6 |
| gdb 238  | 1881.0 <sup>a</sup> | 1878.0 | 1867.4 | 1871.8 | 1885.1 | 1873.9 | 1867.2 | 1873.5 | 1873.5 | 1867.5 | 1867.5 | 1867.5 | 1867.5 |
| gdb 239  | 1881.2 <sup>a</sup> | 1877.4 | 1867.2 | 1870.8 | 1884.1 | 1874.6 | 1866.3 | 1875.3 | 1875.2 | 1870.0 | 1870.0 | 1870.0 | 1870.0 |
| gdb 240  | 1878.3 <sup>a</sup> | 1876.5 | 1867.1 | 1869.9 | 1881.9 | 1872.1 | 1862.9 | 1872.4 | 1872.4 | 1867.4 | 1867.4 | 1867.4 | 1867.4 |
| gdb 241  | 1886.5 <sup>a</sup> | 1882.3 | 1874.4 | 1875.7 | 1890.9 | 1879.7 | 1871.3 | 1880.8 | 1880.8 | 1873.8 | 1873.7 | 1873.7 | 1873.7 |
| gdb 242  | 1889.0 <sup>a</sup> | 1906.0 | 1900.7 | 1895.9 | 1906.1 | 1896.1 | 1892.8 | 1898.4 | 1898.4 | 1890.5 | 1890.5 | 1890.5 | 1890.5 |
| gdb 243  | 1885.1 <sup>a</sup> | 1897.8 | 1890.1 | 1889.2 | 1900.7 | 1892.3 | 1886.8 | 1890.7 | 1890.7 | 1886.7 | 1886.7 | 1886.7 | 1886.7 |
| gdb 244  | 1881.3 <sup>a</sup> | 1897.2 | 1890.7 | 1888.5 | 1898.5 | 1889.7 | 1883.9 | 1887.3 | 1887.3 | 1883.3 | 1883.3 | 1883.3 | 1883.3 |
| gdb 245  | 1888.9 <sup>a</sup> | 1901.9 | 1895.9 | 1894.2 | 1903.7 | 1894.1 | 1889.2 | 1893.9 | 1893.9 | 1887.6 | 1887.6 | 1887.6 | 1887.6 |
| gdb 246  | 1889.6 <sup>a</sup> | 1897.5 | 1890.0 | 1888.3 | 1895.8 | 1891.2 | 1890.2 | 1892.3 | 1892.3 | 1885.5 | 1885.5 | 1885.5 | 1885.5 |
| gdb 247  | 1890.0 <sup>a</sup> | 1897.4 | 1889.7 | 1888.6 | 1894.7 | 1890.0 | 1889.2 | 1891.3 | 1891.3 | 1884.3 | 1884.3 | 1884.3 | 1884.3 |
| gdb 248  | 1888.8 <sup>a</sup> | 1896.4 | 1890.7 | 1888.3 | 1893.2 | 1888.1 | 1887.2 | 1889.1 | 1889.1 | 1882.6 | 1882.5 | 1882.5 | 1882.5 |
| gdb 249  | 1867.5 <sup>a</sup> | 1881.0 | 1866.5 | 1868.6 | 1879.3 | 1868.0 | 1856.0 | 1860.5 | 1860.5 | 1854.3 | 1854.3 | 1854.3 | 1854.3 |
| gdb 250  | 1864.0 <sup>a</sup> | 1877.2 | 1858.4 | 1863.8 | 1873.7 | 1864.6 | 1853.9 | 1857.3 | 1857.3 | 1853.9 | 1853.9 | 1853.9 | 1853.9 |
| gdb 251  | 1868.3 <sup>a</sup> | 1883.4 | 1870.1 | 1870.5 | 1882.9 | 1871.0 | 1860.4 | 1864.9 | 1864.9 | 1857.6 | 1857.6 | 1857.6 | 1857.6 |
| gdb 252  | 1869.5 <sup>a</sup> | 1875.3 | 1857.1 | 1863.4 | 1873.5 | 1867.3 | 1859.4 | 1862.3 | 1862.3 | 1855.9 | 1855.9 | 1855.9 | 1855.9 |
| gdb 253  | 1863.7 <sup>a</sup> | 1873.3 | 1857.1 | 1862.4 | 1873.1 | 1865.8 | 1855.8 | 1858.7 | 1858.7 | 1852.5 | 1852.5 | 1852.5 | 1852.5 |
| gdb 254  | 1862.7 <sup>a</sup> | 1872.9 | 1856.5 | 1861.7 | 1871.4 | 1864.3 | 1854.5 | 1857.6 | 1857.6 | 1851.2 | 1851.2 | 1851.2 | 1851.2 |
| gdb 255  | 1862.4 <sup>a</sup> | 1871.8 | 1852.2 | 1859.2 | 1871.4 | 1860.8 | 1847.8 | 1849.7 | 1849.7 | 1848.0 | 1848.0 | 1848.0 | 1848.0 |
| gdb 256  | 1862.6 <sup>a</sup> | 1872.6 | 1856.3 | 1861.1 | 1875.7 | 1863.7 | 1849.2 | 1851.2 | 1851.2 | 1848.7 | 1848.7 | 1848.7 | 1848.7 |
| gdb 257  | 1862.7 <sup>a</sup> | 1872.6 | 1856.5 | 1861.1 | 1875.3 | 1863.4 | 1848.5 | 1850.6 | 1850.6 | 1848.0 | 1848.0 | 1848.0 | 1848.0 |
| gdb 258  | 1876.2 <sup>a</sup> | 1872.9 | 1860.1 | 1865.7 | 1875.1 | 1865.3 | 1860.2 | 1871.6 | 1871.6 | 1863.7 | 1863.7 | 1863.7 | 1863.7 |
| gdb 259  | 1869.2 <sup>a</sup> | 1864.2 | 1851.2 | 1858.4 | 1871.8 | 1861.6 | 1854.8 | 1865.2 | 1865.2 | 1860.7 | 1860.7 | 1860.7 | 1860.7 |
| gdb 260  | 1867.4 <sup>a</sup> | 1864.1 | 1853.1 | 1858.5 | 1872.4 | 1861.1 | 1852.9 | 1864.1 | 1864.1 | 1859.4 | 1859.4 | 1859.4 | 1859.4 |
| gdb 261  | 1870.1 <sup>a</sup> | 1865.6 | 1855.6 | 1860.3 | 1875.1 | 1863.7 | 1855.7 | 1866.6 | 1866.6 | 1861.3 | 1861.3 | 1861.3 | 1861.3 |
| gdb 262  | 1869.0 <sup>a</sup> | 1865.3 | 1857.5 | 1860.6 | 1876.3 | 1863.7 | 1854.4 | 1865.5 | 1865.5 | 1860.9 | 1860.9 | 1860.9 | 1860.9 |
| gdb 263  | 1869.4 <sup>a</sup> | 1865.4 | 1853.0 | 1859.6 | 1874.0 | 1862.3 | 1854.6 | 1865.6 | 1865.6 | 1860.5 | 1860.5 | 1860.5 | 1860.5 |
| gdb 264  | 1877.6 <sup>a</sup> | 1872.7 | 1856.5 | 1864.4 | 1877.0 | 1868.2 | 1861.5 | 1872.5 | 1872.5 | 1865.8 | 1865.8 | 1865.8 | 1865.8 |
| gdb 265  | 1876.3 <sup>a</sup> | 1871.8 | 1857.9 | 1864.2 | 1878.3 | 1868.4 | 1860.9 | 1872.4 | 1872.4 | 1866.0 | 1865.9 | 1865.9 | 1865.9 |
| gdb 266  | 1843.2 <sup>a</sup> | 1858.5 | 1826.8 | 1840.9 | 1855.9 | 1843.8 | 1828.7 | 1827.9 | 1827.9 | 1825.1 | 1825.1 | 1825.1 | 1825.1 |
| gdb 267  | 1841.3 <sup>a</sup> | 1858.1 | 1828.0 | 1840.2 | 1854.8 | 1842.2 | 1826.2 | 1825.0 | 1825.0 | 1822.6 | 1822.6 | 1822.6 | 1822.6 |
| gdb 268  | 1841.4 <sup>a</sup> | 1859.1 | 1828.6 | 1841.6 | 1856.3 | 1843.4 | 1828.2 | 1826.8 | 1826.8 | 1824.0 | 1824.0 | 1824.0 | 1824.0 |
| gdb 269  | 1838.5 <sup>a</sup> | 1858.7 | 1829.7 | 1841.5 | 1855.0 | 1841.7 | 1824.8 | 1823.8 | 1823.8 | 1821.1 | 1821.1 | 1821.1 | 1821.1 |

... continued on next page ...

Table S26: ... continued from previous page. ...

| Molecule | Ref.                | MNDO   | AMI    | PM3    | PM6    | PM7    | OM1    |        | OM2    |        | OM3    |        | D3T    |
|----------|---------------------|--------|--------|--------|--------|--------|--------|--------|--------|--------|--------|--------|--------|
|          |                     |        |        |        |        |        | D2     | D3     | D2     | D3     | D2     | D3     |        |
| gdb 270  | 1848.6 <sup>a</sup> | 1861.8 | 1829.9 | 1844.5 | 1855.7 | 1848.1 | 1838.1 | 1839.1 | 1839.0 | 1839.1 | 1832.1 | 1832.1 | 1832.1 |
| gdb 271  | 1846.8 <sup>a</sup> | 1861.4 | 1831.2 | 1844.6 | 1855.4 | 1847.3 | 1835.6 | 1836.3 | 1836.3 | 1836.3 | 1829.5 | 1829.5 | 1829.5 |
| gdb 272  | 1868.2 <sup>a</sup> | 1884.2 | 1865.4 | 1871.0 | 1882.4 | 1871.9 | 1864.3 | 1869.0 | 1869.0 | 1869.0 | 1863.5 | 1863.5 | 1863.5 |
| gdb 273  | 1865.3 <sup>a</sup> | 1881.2 | 1862.3 | 1870.4 | 1882.8 | 1872.5 | 1860.9 | 1865.0 | 1865.0 | 1865.0 | 1860.6 | 1860.6 | 1860.6 |
| gdb 274  | 1861.3 <sup>a</sup> | 1881.2 | 1862.3 | 1870.2 | 1880.7 | 1869.3 | 1858.0 | 1861.6 | 1861.5 | 1861.5 | 1857.1 | 1857.1 | 1857.1 |
| gdb 275  | 1871.5 <sup>a</sup> | 1882.5 | 1863.7 | 1871.7 | 1879.3 | 1874.8 | 1868.4 | 1873.2 | 1873.2 | 1873.2 | 1864.9 | 1864.9 | 1864.9 |
| gdb 276  | 1874.6 <sup>a</sup> | 1881.5 | 1861.9 | 1870.7 | 1879.6 | 1873.4 | 1866.5 | 1868.9 | 1868.9 | 1868.9 | 1861.5 | 1861.5 | 1861.5 |
| gdb 277  | 1870.0 <sup>a</sup> | 1880.9 | 1863.4 | 1869.9 | 1876.0 | 1869.4 | 1863.0 | 1864.6 | 1864.6 | 1864.6 | 1857.4 | 1857.4 | 1857.4 |
| gdb 278  | 1863.1 <sup>a</sup> | 1873.6 | 1862.7 | 1864.8 | 1876.7 | 1869.7 | 1860.7 | 1862.7 | 1862.7 | 1862.7 | 1855.6 | 1855.6 | 1855.6 |
| gdb 279  | 1868.8 <sup>a</sup> | 1876.5 | 1859.5 | 1863.2 | 1873.9 | 1868.1 | 1860.9 | 1860.8 | 1860.8 | 1860.8 | 1854.3 | 1854.3 | 1854.3 |
| gdb 280  | 1862.4 <sup>a</sup> | 1875.7 | 1860.6 | 1863.8 | 1877.9 | 1868.7 | 1858.8 | 1859.7 | 1859.7 | 1859.7 | 1855.3 | 1855.3 | 1855.3 |
| gdb 281  | 1859.6 <sup>a</sup> | 1871.3 | 1856.6 | 1856.5 | 1870.6 | 1863.9 | 1859.1 | 1856.3 | 1856.3 | 1856.3 | 1850.8 | 1850.8 | 1850.8 |
| gdb 282  | 1855.0 <sup>a</sup> | 1870.1 | 1853.6 | 1854.7 | 1867.6 | 1860.6 | 1857.0 | 1852.3 | 1852.3 | 1852.3 | 1850.8 | 1850.8 | 1850.8 |
| gdb 283  | 1870.0 <sup>a</sup> | 1870.5 | 1855.7 | 1854.6 | 1866.9 | 1864.7 | 1862.9 | 1859.9 | 1859.9 | 1859.9 | 1852.9 | 1852.9 | 1852.9 |
| gdb 284  | 1880.8 <sup>a</sup> | 1882.7 | 1877.6 | 1874.8 | 1882.7 | 1875.9 | 1882.0 | 1882.4 | 1882.4 | 1882.4 | 1875.5 | 1875.5 | 1875.5 |
| gdb 285  | 1877.0 <sup>a</sup> | 1872.8 | 1874.8 | 1870.6 | 1888.6 | 1877.0 | 1866.3 | 1876.9 | 1876.9 | 1876.9 | 1870.0 | 1870.0 | 1870.0 |
| gdb 286  | 1881.2 <sup>a</sup> | 1881.8 | 1877.1 | 1875.3 | 1892.8 | 1884.4 | 1874.8 | 1883.7 | 1883.7 | 1883.7 | 1876.9 | 1876.9 | 1876.9 |
| gdb 287  | 1869.2 <sup>a</sup> | 1866.7 | 1863.5 | 1866.1 | 1880.5 | 1871.4 | 1859.4 | 1868.6 | 1868.6 | 1868.6 | 1865.4 | 1865.4 | 1865.4 |
| gdb 288  | 1871.0 <sup>a</sup> | 1867.0 | 1866.1 | 1864.5 | 1879.6 | 1870.7 | 1860.8 | 1868.6 | 1868.6 | 1868.6 | 1865.3 | 1865.3 | 1865.3 |
| gdb 289  | 1872.4 <sup>a</sup> | 1875.1 | 1866.4 | 1867.8 | 1880.5 | 1874.1 | 1863.7 | 1871.4 | 1871.4 | 1871.4 | 1867.5 | 1867.5 | 1867.5 |
| gdb 290  | 1867.4 <sup>a</sup> | 1864.8 | 1860.2 | 1861.4 | 1874.2 | 1866.4 | 1856.8 | 1863.8 | 1863.8 | 1863.8 | 1861.9 | 1861.9 | 1861.9 |
| gdb 291  | 1871.0 <sup>a</sup> | 1862.1 | 1859.9 | 1862.5 | 1874.6 | 1869.5 | 1860.4 | 1867.6 | 1867.6 | 1867.6 | 1861.8 | 1861.8 | 1861.8 |
| gdb 292  | 1871.3 <sup>a</sup> | 1861.7 | 1858.6 | 1861.2 | 1873.3 | 1867.8 | 1859.8 | 1866.6 | 1866.6 | 1866.6 | 1860.9 | 1860.9 | 1860.9 |
| gdb 293  | 1886.9 <sup>a</sup> | 1914.7 | 1905.1 | 1905.1 | 1912.7 | 1902.9 | 1895.0 | 1899.9 | 1899.9 | 1899.9 | 1894.3 | 1894.3 | 1894.3 |
| gdb 294  | 1892.0 <sup>a</sup> | 1919.0 | 1911.1 | 1910.0 | 1916.3 | 1905.3 | 1898.1 | 1903.9 | 1903.9 | 1903.9 | 1896.0 | 1896.0 | 1896.0 |
| gdb 295  | 1888.8 <sup>a</sup> | 1914.5 | 1904.5 | 1904.9 | 1911.6 | 1901.6 | 1894.6 | 1899.6 | 1899.6 | 1899.6 | 1893.7 | 1893.6 | 1893.6 |
| gdb 296  | 1893.2 <sup>a</sup> | 1911.0 | 1899.9 | 1901.4 | 1910.2 | 1900.6 | 1892.1 | 1895.0 | 1894.9 | 1894.9 | 1890.4 | 1890.4 | 1890.4 |
| gdb 297  | 1887.1 <sup>a</sup> | 1891.3 | 1888.9 | 1887.5 | 1899.1 | 1890.5 | 1880.4 | 1889.5 | 1889.5 | 1889.5 | 1883.4 | 1883.4 | 1883.4 |
| gdb 298  | 1891.7 <sup>a</sup> | 1896.4 | 1896.4 | 1893.1 | 1904.6 | 1894.2 | 1884.5 | 1894.9 | 1894.9 | 1894.9 | 1886.3 | 1886.3 | 1886.3 |
| gdb 299  | 1883.5 <sup>a</sup> | 1890.6 | 1886.7 | 1886.6 | 1895.0 | 1886.4 | 1877.1 | 1885.7 | 1885.7 | 1885.7 | 1879.6 | 1879.6 | 1879.6 |
| gdb 300  | 1884.7 <sup>a</sup> | 1890.8 | 1888.4 | 1887.2 | 1899.3 | 1890.1 | 1879.2 | 1888.3 | 1888.3 | 1888.3 | 1882.4 | 1882.4 | 1882.4 |
| gdb 301  | 1883.9 <sup>a</sup> | 1890.9 | 1884.9 | 1885.1 | 1895.5 | 1886.9 | 1876.5 | 1883.6 | 1883.6 | 1883.6 | 1877.8 | 1877.8 | 1877.8 |
| gdb 302  | 1888.9 <sup>a</sup> | 1893.1 | 1886.1 | 1886.4 | 1897.0 | 1888.7 | 1880.7 | 1887.6 | 1887.6 | 1887.6 | 1881.5 | 1881.5 | 1881.5 |
| gdb 303  | 1887.8 <sup>a</sup> | 1892.3 | 1885.8 | 1886.3 | 1898.8 | 1889.9 | 1880.4 | 1887.3 | 1887.3 | 1887.3 | 1881.6 | 1881.6 | 1881.6 |
| gdb 304  | 1868.0 <sup>a</sup> | 1887.7 | 1871.5 | 1874.2 | 1887.0 | 1876.1 | 1864.7 | 1865.3 | 1865.3 | 1865.3 | 1860.6 | 1860.6 | 1860.6 |
| gdb 305  | 1866.0 <sup>a</sup> | 1885.3 | 1867.7 | 1870.2 | 1883.3 | 1873.2 | 1863.8 | 1862.4 | 1862.4 | 1862.4 | 1858.6 | 1858.6 | 1858.6 |
| gdb 306  | 1864.3 <sup>a</sup> | 1886.0 | 1869.2 | 1871.6 | 1884.2 | 1873.2 | 1863.6 | 1861.9 | 1861.9 | 1861.9 | 1858.2 | 1858.2 | 1858.2 |
| gdb 307  | 1870.5 <sup>a</sup> | 1888.2 | 1872.0 | 1875.8 | 1882.9 | 1877.5 | 1868.3 | 1868.4 | 1868.4 | 1868.4 | 1861.1 | 1861.1 | 1861.1 |
| gdb 308  | 1872.1 <sup>a</sup> | 1886.4 | 1869.3 | 1871.9 | 1881.3 | 1874.6 | 1867.8 | 1866.0 | 1866.0 | 1866.0 | 1859.5 | 1859.5 | 1859.5 |
| gdb 309  | 1872.1 <sup>a</sup> | 1886.5 | 1869.9 | 1872.3 | 1883.0 | 1876.0 | 1868.9 | 1866.7 | 1866.7 | 1866.7 | 1860.6 | 1860.5 | 1860.5 |
| gdb 310  | 1884.7 <sup>a</sup> | 1904.3 | 1892.5 | 1891.6 | 1899.0 | 1889.9 | 1885.3 | 1889.6 | 1889.6 | 1889.6 | 1883.9 | 1883.9 | 1883.9 |
| gdb 311  | 1882.2 <sup>a</sup> | 1898.1 | 1886.0 | 1886.9 | 1896.5 | 1888.0 | 1883.1 | 1886.7 | 1886.7 | 1886.7 | 1883.7 | 1883.7 | 1883.7 |
| gdb 312  | 1881.8 <sup>a</sup> | 1899.2 | 1890.0 | 1888.2 | 1898.0 | 1888.1 | 1883.7 | 1888.4 | 1888.4 | 1888.4 | 1883.9 | 1883.9 | 1883.9 |
| gdb 313  | 1890.3 <sup>a</sup> | 1903.1 | 1893.8 | 1892.6 | 1902.1 | 1891.5 | 1887.9 | 1893.0 | 1893.0 | 1893.0 | 1886.4 | 1886.4 | 1886.4 |
| gdb 314  | 1879.3 <sup>a</sup> | 1896.8 | 1884.2 | 1885.9 | 1893.3 | 1884.6 | 1877.9 | 1881.2 | 1881.2 | 1881.2 | 1878.9 | 1878.9 | 1878.9 |

... continued on next page ...

Table S26: ... continued from previous page. ...

| Molecule | Ref.                | MNDO   | AMI    | PM3    | PM6    | PM7    | OM1    |        | OM2    |        | OM3    |        | D3T    |
|----------|---------------------|--------|--------|--------|--------|--------|--------|--------|--------|--------|--------|--------|--------|
|          |                     |        |        |        |        |        | D2     | D3     | D2     | D3     | D2     | D3     |        |
| gdb 315  | 1878.5 <sup>a</sup> | 1897.8 | 1888.6 | 1887.5 | 1896.0 | 1885.9 | 1879.3 | 1883.8 | 1883.8 | 1879.8 | 1879.8 | 1883.8 | 1879.8 |
| gdb 316  | 1880.4 <sup>a</sup> | 1898.7 | 1888.0 | 1887.8 | 1897.4 | 1887.9 | 1881.8 | 1885.8 | 1885.6 | 1881.9 | 1881.9 | 1885.6 | 1881.9 |
| gdb 317  | 1887.6 <sup>a</sup> | 1897.4 | 1885.2 | 1887.1 | 1893.3 | 1889.0 | 1886.5 | 1889.0 | 1889.0 | 1882.7 | 1882.6 | 1889.0 | 1882.6 |
| gdb 318  | 1885.0 <sup>a</sup> | 1896.7 | 1885.9 | 1886.9 | 1891.5 | 1886.8 | 1883.6 | 1886.8 | 1886.8 | 1880.3 | 1880.3 | 1886.8 | 1880.3 |
| gdb 319  | 1886.7 <sup>a</sup> | 1896.0 | 1884.2 | 1885.9 | 1891.3 | 1887.7 | 1885.0 | 1888.1 | 1888.1 | 1881.7 | 1881.7 | 1888.1 | 1881.7 |
| gdb 320  | 1857.6 <sup>a</sup> | 1873.9 | 1869.1 | 1864.3 | 1876.8 | 1870.2 | 1860.3 | 1857.7 | 1857.7 | 1854.9 | 1854.9 | 1857.7 | 1854.9 |
| gdb 321  | 1848.2 <sup>a</sup> | 1846.3 | 1831.2 | 1841.0 | 1855.9 | 1846.2 | 1834.4 | 1839.0 | 1839.0 | 1834.2 | 1834.1 | 1839.0 | 1834.1 |
| gdb 322  | 1848.4 <sup>a</sup> | 1845.3 | 1831.2 | 1839.6 | 1853.4 | 1843.6 | 1834.2 | 1838.5 | 1838.5 | 1833.0 | 1833.0 | 1838.5 | 1833.0 |
| gdb 323  | 1847.8 <sup>a</sup> | 1849.7 | 1836.5 | 1840.8 | 1862.1 | 1849.4 | 1836.3 | 1841.1 | 1841.1 | 1838.4 | 1838.4 | 1841.1 | 1838.4 |
| gdb 324  | 1846.6 <sup>a</sup> | 1848.7 | 1832.0 | 1838.9 | 1857.1 | 1845.2 | 1833.4 | 1836.1 | 1836.1 | 1835.1 | 1835.1 | 1836.1 | 1835.1 |
| gdb 325  | 1851.3 <sup>a</sup> | 1855.3 | 1844.6 | 1845.8 | 1865.7 | 1853.6 | 1842.1 | 1847.5 | 1847.5 | 1842.1 | 1842.1 | 1847.5 | 1842.1 |
| gdb 326  | 1865.0 <sup>a</sup> | 1881.1 | 1867.6 | 1870.6 | 1884.5 | 1873.4 | 1859.0 | 1862.3 | 1862.3 | 1857.1 | 1857.0 | 1862.3 | 1857.0 |
| gdb 327  | 1861.4 <sup>a</sup> | 1881.6 | 1864.6 | 1870.4 | 1881.5 | 1870.5 | 1856.0 | 1858.7 | 1858.7 | 1853.8 | 1853.8 | 1858.7 | 1853.8 |
| gdb 328  | 1861.7 <sup>a</sup> | 1883.6 | 1873.3 | 1875.3 | 1890.3 | 1878.7 | 1861.9 | 1868.4 | 1868.4 | 1859.6 | 1859.6 | 1868.4 | 1859.6 |
| gdb 329  | 1870.1 <sup>a</sup> | 1883.2 | 1863.3 | 1868.6 | 1881.9 | 1871.8 | 1859.5 | 1861.5 | 1861.5 | 1856.6 | 1856.6 | 1861.5 | 1856.6 |
| gdb 330  | 1859.9 <sup>a</sup> | 1871.2 | 1857.7 | 1855.0 | 1868.9 | 1862.5 | 1858.2 | 1857.1 | 1857.1 | 1850.6 | 1850.6 | 1857.1 | 1850.6 |
| gdb 331  | 1860.6 <sup>a</sup> | 1868.8 | 1854.9 | 1854.1 | 1866.3 | 1862.2 | 1859.2 | 1856.0 | 1856.0 | 1850.7 | 1850.7 | 1856.0 | 1850.7 |
| gdb 332  | 1859.1 <sup>a</sup> | 1871.0 | 1862.7 | 1858.7 | 1878.1 | 1867.9 | 1858.4 | 1857.7 | 1857.7 | 1852.3 | 1852.3 | 1857.7 | 1852.3 |
| gdb 333  | 1870.1 <sup>a</sup> | 1869.8 | 1858.2 | 1857.7 | 1868.5 | 1866.5 | 1864.7 | 1862.5 | 1862.5 | 1854.0 | 1854.0 | 1862.5 | 1854.0 |
| gdb 334  | 1864.1 <sup>a</sup> | 1884.6 | 1863.2 | 1870.1 | 1881.3 | 1870.3 | 1857.1 | 1858.1 | 1858.1 | 1855.5 | 1855.5 | 1858.1 | 1855.5 |
| gdb 335  | 1864.1 <sup>a</sup> | 1884.2 | 1864.1 | 1870.0 | 1882.1 | 1870.3 | 1857.0 | 1857.1 | 1857.1 | 1854.4 | 1854.4 | 1857.1 | 1854.4 |
| gdb 336  | 1864.1 <sup>a</sup> | 1885.8 | 1867.2 | 1871.1 | 1884.1 | 1871.6 | 1860.3 | 1861.2 | 1861.2 | 1856.7 | 1856.7 | 1861.2 | 1856.7 |
| gdb 337  | 1862.9 <sup>a</sup> | 1883.4 | 1860.3 | 1867.5 | 1877.9 | 1867.2 | 1855.2 | 1854.1 | 1854.2 | 1852.7 | 1852.7 | 1854.2 | 1852.7 |
| gdb 338  | 1847.1 <sup>a</sup> | 1860.7 | 1846.0 | 1850.8 | 1867.2 | 1854.5 | 1840.1 | 1841.9 | 1841.9 | 1838.5 | 1838.5 | 1841.9 | 1838.5 |
| gdb 339  | 1865.7 <sup>a</sup> | 1891.2 | 1874.4 | 1877.2 | 1889.4 | 1878.0 | 1865.1 | 1867.2 | 1867.2 | 1860.7 | 1860.7 | 1867.2 | 1860.7 |
| gdb 340  | 1861.1 <sup>a</sup> | 1871.7 | 1852.5 | 1857.4 | 1866.7 | 1861.7 | 1854.6 | 1857.0 | 1857.0 | 1849.8 | 1849.8 | 1857.0 | 1849.8 |
| gdb 341  | 1870.1 <sup>a</sup> | 1886.1 | 1867.0 | 1873.1 | 1880.4 | 1873.7 | 1864.1 | 1865.9 | 1865.9 | 1859.0 | 1859.0 | 1865.9 | 1859.0 |
| gdb 342  | 1871.5 <sup>a</sup> | 1883.6 | 1861.8 | 1868.8 | 1876.9 | 1869.7 | 1862.2 | 1862.2 | 1862.2 | 1856.0 | 1856.0 | 1862.2 | 1856.0 |
| gdb 343  | 1865.8 <sup>a</sup> | 1876.2 | 1870.7 | 1863.9 | 1875.1 | 1870.7 | 1862.4 | 1860.9 | 1860.9 | 1854.9 | 1854.9 | 1860.9 | 1854.9 |
| gdb 344  | 1891.7 <sup>a</sup> | 1894.9 | 1903.2 | 1894.6 | 1903.3 | 1896.5 | 1887.1 | 1893.0 | 1893.0 | 1885.2 | 1885.2 | 1893.0 | 1885.2 |
| gdb 345  | 1886.8 <sup>a</sup> | 1889.1 | 1896.6 | 1890.7 | 1901.3 | 1894.7 | 1881.9 | 1889.2 | 1889.2 | 1884.1 | 1884.1 | 1889.2 | 1884.1 |
| gdb 346  | 1887.9 <sup>a</sup> | 1893.5 | 1896.9 | 1891.2 | 1899.6 | 1894.4 | 1885.4 | 1891.5 | 1891.5 | 1885.9 | 1885.9 | 1891.5 | 1885.9 |
| gdb 347  | 1896.2 <sup>a</sup> | 1898.8 | 1903.6 | 1896.1 | 1908.2 | 1902.0 | 1893.7 | 1899.7 | 1899.7 | 1892.4 | 1892.4 | 1899.7 | 1892.4 |
| gdb 348  | 1869.6 <sup>a</sup> | 1883.3 | 1880.2 | 1871.5 | 1884.0 | 1876.7 | 1868.6 | 1865.5 | 1865.5 | 1860.6 | 1860.6 | 1865.5 | 1860.6 |
| gdb 349  | 1869.8 <sup>a</sup> | 1876.6 | 1872.0 | 1866.6 | 1877.0 | 1873.9 | 1866.9 | 1864.7 | 1864.7 | 1858.7 | 1858.7 | 1864.7 | 1858.7 |
| gdb 350  | 1866.3 <sup>a</sup> | 1875.8 | 1871.7 | 1864.7 | 1874.6 | 1871.5 | 1865.2 | 1863.5 | 1863.5 | 1856.9 | 1856.9 | 1863.5 | 1856.9 |
| gdb 351  | 1896.0 <sup>a</sup> | 1908.0 | 1911.5 | 1902.0 | 1907.3 | 1900.9 | 1893.3 | 1897.3 | 1897.3 | 1889.7 | 1889.7 | 1897.3 | 1889.7 |
| gdb 352  | 1890.6 <sup>a</sup> | 1902.9 | 1902.2 | 1896.8 | 1902.7 | 1898.1 | 1888.9 | 1892.5 | 1892.5 | 1887.3 | 1887.2 | 1892.5 | 1887.2 |
| gdb 353  | 1895.8 <sup>a</sup> | 1907.3 | 1909.8 | 1900.9 | 1905.6 | 1899.5 | 1892.8 | 1896.7 | 1896.7 | 1888.7 | 1888.7 | 1896.7 | 1888.7 |
| gdb 354  | 1866.6 <sup>a</sup> | 1902.3 | 1884.7 | 1885.1 | 1891.3 | 1882.8 | 1869.6 | 1871.1 | 1871.1 | 1866.6 | 1866.6 | 1871.1 | 1866.6 |
| gdb 355  | 1831.3 <sup>a</sup> | 1831.1 | 1792.7 | 1813.2 | 1833.7 | 1816.7 | 1808.0 | 1813.0 | 1813.5 | 1808.8 | 1808.8 | 1813.5 | 1808.8 |
| gdb 356  | 1829.9 <sup>a</sup> | 1831.0 | 1794.3 | 1812.8 | 1833.4 | 1815.8 | 1806.1 | 1811.3 | 1811.3 | 1807.0 | 1806.9 | 1811.3 | 1807.0 |
| gdb 357  | 1870.4 <sup>a</sup> | 1895.1 | 1879.4 | 1881.5 | 1888.9 | 1881.6 | 1871.0 | 1872.1 | 1872.1 | 1867.3 | 1867.3 | 1872.1 | 1867.3 |
| gdb 358  | 1868.1 <sup>a</sup> | 1894.4 | 1881.0 | 1887.4 | 1887.4 | 1879.5 | 1867.8 | 1869.3 | 1869.3 | 1864.4 | 1864.4 | 1869.3 | 1864.4 |
| gdb 359  | 1827.4 <sup>a</sup> | 1827.5 | 1794.9 | 1811.5 | 1833.3 | 1816.0 | 1808.5 | 1811.2 | 1811.2 | 1806.9 | 1806.9 | 1811.2 | 1806.9 |

... continued on next page ...

Table S26: ... continued from previous page. ...

| Molecule | Ref.                | MNDO   | AMI    | PM3    | PM6    | PM7    | OM1    |        | OM2    |        | OM3    |        | D3T    |
|----------|---------------------|--------|--------|--------|--------|--------|--------|--------|--------|--------|--------|--------|--------|
|          |                     |        |        |        |        |        | D2     | D3     | D2     | D3     | D2     | D3     |        |
| gdb 360  | 1824.9 <sup>a</sup> | 1827.8 | 1796.1 | 1811.3 | 1831.3 | 1814.0 | 1806.5 | 1809.0 | 1809.0 | 1809.0 | 1804.9 | 1804.9 | 1804.9 |
| gdb 361  | 1839.8 <sup>a</sup> | 1856.4 | 1829.1 | 1840.6 | 1855.0 | 1842.0 | 1827.9 | 1825.7 | 1825.6 | 1824.5 | 1823.5 | 1821.9 | 1821.9 |
| gdb 362  | 1837.1 <sup>a</sup> | 1856.9 | 1830.7 | 1840.7 | 1853.7 | 1840.6 | 1826.5 | 1822.5 | 1822.5 | 1822.5 | 1820.2 | 1820.1 | 1820.2 |
| gdb 363  | 1872.5 <sup>a</sup> | 1889.7 | 1876.4 | 1878.6 | 1887.7 | 1880.5 | 1871.9 | 1872.7 | 1872.7 | 1872.7 | 1867.6 | 1867.5 | 1867.5 |
| gdb 364  | 1869.7 <sup>a</sup> | 1889.4 | 1877.1 | 1878.4 | 1886.2 | 1878.5 | 1869.6 | 1870.0 | 1870.0 | 1870.0 | 1865.2 | 1865.1 | 1865.2 |
| gdb 365  | 1861.1 <sup>a</sup> | 1873.6 | 1859.0 | 1862.2 | 1880.8 | 1869.2 | 1858.3 | 1866.5 | 1866.5 | 1866.5 | 1858.3 | 1858.3 | 1858.3 |
| gdb 366  | 1860.8 <sup>a</sup> | 1871.1 | 1852.4 | 1858.5 | 1873.9 | 1863.3 | 1852.8 | 1858.9 | 1858.9 | 1858.9 | 1853.6 | 1853.6 | 1853.6 |
| gdb 367  | 1863.2 <sup>a</sup> | 1870.6 | 1854.3 | 1859.7 | 1869.7 | 1862.6 | 1855.7 | 1860.8 | 1860.8 | 1860.8 | 1853.6 | 1853.5 | 1853.5 |
| gdb 368  | 1861.5 <sup>a</sup> | 1871.4 | 1853.9 | 1860.4 | 1870.8 | 1863.6 | 1856.5 | 1861.4 | 1861.4 | 1861.4 | 1853.9 | 1853.8 | 1853.8 |
| gdb 369  | 1865.3 <sup>a</sup> | 1872.9 | 1850.9 | 1858.7 | 1868.1 | 1862.3 | 1856.8 | 1860.8 | 1860.8 | 1860.8 | 1852.7 | 1852.7 | 1852.7 |
| gdb 370  | 1876.1 <sup>a</sup> | 1876.9 | 1868.1 | 1871.1 | 1885.5 | 1877.1 | 1868.2 | 1878.5 | 1878.5 | 1878.5 | 1872.8 | 1872.8 | 1872.8 |
| gdb 371  | 1882.0 <sup>a</sup> | 1882.0 | 1875.6 | 1877.0 | 1890.8 | 1880.9 | 1873.5 | 1884.7 | 1884.7 | 1884.7 | 1876.3 | 1876.3 | 1876.3 |
| gdb 372  | 1880.4 <sup>a</sup> | 1877.7 | 1867.7 | 1872.1 | 1879.6 | 1875.8 | 1871.1 | 1878.1 | 1878.1 | 1878.1 | 1870.2 | 1870.2 | 1870.2 |
| gdb 373  | 1848.3 <sup>a</sup> | 1875.5 | 1837.0 | 1855.9 | 1868.0 | 1855.0 | 1839.4 | 1840.7 | 1840.7 | 1840.7 | 1837.5 | 1837.4 | 1837.4 |
| gdb 374  | 1852.5 <sup>a</sup> | 1877.3 | 1842.2 | 1859.7 | 1870.3 | 1860.1 | 1848.3 | 1850.8 | 1850.8 | 1850.8 | 1843.7 | 1843.7 | 1843.7 |
| gdb 375  | 1848.0 <sup>a</sup> | 1877.0 | 1843.3 | 1858.7 | 1866.8 | 1856.1 | 1844.8 | 1846.5 | 1846.5 | 1846.5 | 1839.3 | 1839.3 | 1839.3 |
| gdb 376  | 1872.3 <sup>a</sup> | 1870.2 | 1856.5 | 1862.7 | 1877.0 | 1869.8 | 1860.6 | 1866.4 | 1866.4 | 1866.4 | 1858.6 | 1858.6 | 1858.6 |
| gdb 377  | 1885.0 <sup>a</sup> | 1885.8 | 1880.0 | 1882.3 | 1895.1 | 1885.3 | 1878.5 | 1891.5 | 1891.5 | 1891.5 | 1882.0 | 1882.0 | 1882.0 |
| gdb 378  | 1885.2 <sup>a</sup> | 1885.6 | 1880.6 | 1882.6 | 1896.2 | 1886.2 | 1878.4 | 1891.6 | 1891.6 | 1891.6 | 1882.4 | 1882.3 | 1882.3 |
| gdb 379  | 1885.1 <sup>a</sup> | 1879.8 | 1874.3 | 1877.7 | 1892.1 | 1883.6 | 1873.4 | 1884.8 | 1884.8 | 1884.8 | 1878.0 | 1878.0 | 1878.0 |
| gdb 380  | 1885.8 <sup>a</sup> | 1884.9 | 1876.2 | 1881.3 | 1894.3 | 1886.0 | 1878.0 | 1889.4 | 1889.4 | 1889.4 | 1881.8 | 1881.8 | 1881.8 |
| gdb 381  | 1879.0 <sup>a</sup> | 1874.8 | 1866.4 | 1871.5 | 1886.0 | 1879.1 | 1868.7 | 1879.1 | 1879.1 | 1879.1 | 1874.6 | 1874.6 | 1874.6 |
| gdb 382  | 1884.1 <sup>a</sup> | 1876.9 | 1871.2 | 1874.5 | 1883.9 | 1879.6 | 1873.3 | 1882.4 | 1882.4 | 1882.4 | 1874.5 | 1874.5 | 1874.5 |
| gdb 383  | 1886.3 <sup>a</sup> | 1881.0 | 1871.6 | 1876.3 | 1886.7 | 1882.7 | 1877.8 | 1887.0 | 1887.0 | 1887.0 | 1878.2 | 1878.2 | 1878.2 |
| gdb 384  | 1882.3 <sup>a</sup> | 1876.9 | 1869.8 | 1873.8 | 1880.3 | 1876.9 | 1871.7 | 1880.5 | 1880.5 | 1880.5 | 1872.3 | 1872.3 | 1872.3 |
| gdb 385  | 1869.0 <sup>a</sup> | 1886.2 | 1864.6 | 1873.4 | 1885.2 | 1875.8 | 1865.5 | 1867.4 | 1867.3 | 1867.3 | 1864.0 | 1864.0 | 1864.0 |
| gdb 386  | 1871.8 <sup>a</sup> | 1885.8 | 1867.2 | 1873.7 | 1882.2 | 1875.0 | 1868.0 | 1868.9 | 1868.9 | 1868.9 | 1862.2 | 1862.2 | 1862.2 |
| gdb 387  | 1869.6 <sup>a</sup> | 1896.1 | 1876.9 | 1881.0 | 1892.6 | 1880.5 | 1872.5 | 1878.7 | 1878.6 | 1878.7 | 1870.2 | 1870.2 | 1870.2 |
| gdb 388  | 1869.9 <sup>a</sup> | 1887.6 | 1863.0 | 1872.6 | 1883.7 | 1874.0 | 1864.7 | 1866.7 | 1866.7 | 1866.7 | 1863.4 | 1863.3 | 1863.3 |
| gdb 389  | 1863.7 <sup>a</sup> | 1885.8 | 1863.1 | 1871.7 | 1882.6 | 1872.1 | 1861.0 | 1862.6 | 1862.6 | 1862.6 | 1859.8 | 1859.8 | 1859.8 |
| gdb 390  | 1868.6 <sup>a</sup> | 1890.2 | 1867.3 | 1874.7 | 1879.9 | 1873.6 | 1869.0 | 1871.8 | 1871.8 | 1871.8 | 1864.0 | 1864.0 | 1864.0 |
| gdb 391  | 1869.0 <sup>a</sup> | 1889.0 | 1868.8 | 1874.4 | 1881.1 | 1873.4 | 1867.7 | 1870.1 | 1870.1 | 1870.1 | 1862.9 | 1862.9 | 1862.9 |
| gdb 392  | 1869.8 <sup>a</sup> | 1890.1 | 1868.9 | 1876.0 | 1883.7 | 1876.4 | 1870.5 | 1873.2 | 1873.2 | 1873.2 | 1865.8 | 1865.8 | 1865.8 |
| gdb 393  | 1847.1 <sup>a</sup> | 1875.7 | 1839.9 | 1855.9 | 1867.6 | 1854.2 | 1840.7 | 1843.4 | 1843.4 | 1843.4 | 1837.9 | 1837.9 | 1837.9 |
| gdb 394  | 1849.3 <sup>a</sup> | 1874.3 | 1835.7 | 1854.7 | 1866.4 | 1854.4 | 1840.0 | 1841.7 | 1841.7 | 1841.7 | 1837.8 | 1837.8 | 1837.8 |
| gdb 395  | 1844.4 <sup>a</sup> | 1873.4 | 1837.3 | 1854.4 | 1865.9 | 1852.5 | 1836.7 | 1837.3 | 1837.3 | 1837.3 | 1834.0 | 1834.0 | 1834.0 |
| gdb 396  | 1854.8 <sup>a</sup> | 1877.0 | 1840.7 | 1858.1 | 1867.5 | 1858.7 | 1849.0 | 1851.4 | 1851.4 | 1851.4 | 1843.4 | 1843.4 | 1843.4 |
| gdb 397  | 1848.4 <sup>a</sup> | 1875.8 | 1842.1 | 1857.2 | 1865.3 | 1855.7 | 1844.7 | 1846.5 | 1846.5 | 1846.5 | 1838.8 | 1838.8 | 1838.8 |
| gdb 398  | 1852.6 <sup>a</sup> | 1876.6 | 1840.3 | 1857.6 | 1865.4 | 1857.3 | 1846.9 | 1850.0 | 1850.0 | 1850.0 | 1841.4 | 1841.4 | 1841.4 |
| gdb 399  | 1864.2 <sup>a</sup> | 1874.4 | 1855.5 | 1863.0 | 1873.4 | 1868.0 | 1862.8 | 1865.3 | 1865.3 | 1865.3 | 1859.6 | 1859.6 | 1859.6 |
| gdb 400  | 1869.4 <sup>a</sup> | 1873.7 | 1857.7 | 1863.6 | 1871.4 | 1868.7 | 1866.6 | 1868.8 | 1868.8 | 1868.8 | 1860.0 | 1860.0 | 1860.0 |
| gdb 401  | 1865.5 <sup>a</sup> | 1867.8 | 1851.2 | 1858.4 | 1874.2 | 1865.8 | 1854.1 | 1860.2 | 1860.2 | 1860.2 | 1855.7 | 1855.7 | 1855.7 |
| gdb 402  | 1870.7 <sup>a</sup> | 1854.7 | 1861.2 | 1873.8 | 1867.5 | 1859.9 | 1864.6 | 1864.6 | 1864.6 | 1864.6 | 1856.5 | 1856.5 | 1856.5 |
| gdb 403  | 1865.2 <sup>a</sup> | 1868.9 | 1857.2 | 1862.3 | 1874.1 | 1867.7 | 1857.9 | 1864.5 | 1864.5 | 1864.5 | 1856.4 | 1856.3 | 1856.3 |
| gdb 404  | 1868.0 <sup>a</sup> | 1870.7 | 1856.8 | 1860.3 | 1872.2 | 1867.8 | 1861.6 | 1862.2 | 1862.2 | 1862.2 | 1856.8 | 1856.8 | 1856.8 |

... continued on next page ...

Table S26: ... continued from previous page. ...

| Molecule | Ref.                | MNDO   | AMI    | PM3    | PM6    | PM7    | OM1    |        | OM2    |        | OM3    |        | D3T    |
|----------|---------------------|--------|--------|--------|--------|--------|--------|--------|--------|--------|--------|--------|--------|
|          |                     |        |        |        |        |        | OM1    | OM2    | OM3    | OM3    | D2     | D3     |        |
| gdb 405  | 1856.0 <sup>a</sup> | 1869.1 | 1854.3 | 1859.6 | 1873.1 | 1865.4 | 1855.2 | 1854.0 | 1854.0 | 1854.0 | 1851.8 | 1851.8 | 1851.8 |
| gdb 406  | 1876.2 <sup>a</sup> | 1871.9 | 1859.7 | 1861.7 | 1871.5 | 1869.2 | 1867.0 | 1867.3 | 1867.3 | 1867.3 | 1859.2 | 1859.2 | 1859.2 |
| gdb 407  | 1864.1 <sup>a</sup> | 1870.9 | 1857.9 | 1860.3 | 1871.3 | 1866.0 | 1860.6 | 1860.4 | 1860.4 | 1860.4 | 1854.7 | 1854.6 | 1854.6 |
| gdb 408  | 1867.6 <sup>a</sup> | 1887.0 | 1867.2 | 1873.5 | 1884.2 | 1874.1 | 1865.2 | 1868.1 | 1868.1 | 1868.1 | 1862.9 | 1862.9 | 1862.9 |
| gdb 409  | 1867.4 <sup>a</sup> | 1885.0 | 1863.2 | 1871.0 | 1881.4 | 1872.3 | 1862.8 | 1863.7 | 1863.7 | 1863.7 | 1860.4 | 1860.4 | 1860.4 |
| gdb 410  | 1867.7 <sup>a</sup> | 1884.9 | 1864.0 | 1871.6 | 1883.1 | 1873.5 | 1862.6 | 1863.9 | 1863.9 | 1863.9 | 1860.7 | 1860.7 | 1860.7 |
| gdb 411  | 1871.7 <sup>a</sup> | 1886.4 | 1865.6 | 1872.3 | 1879.3 | 1872.9 | 1867.1 | 1867.5 | 1867.5 | 1867.5 | 1860.5 | 1860.5 | 1860.5 |
| gdb 412  | 1872.9 <sup>a</sup> | 1885.9 | 1866.3 | 1872.8 | 1881.3 | 1874.4 | 1867.6 | 1868.1 | 1868.1 | 1868.1 | 1861.4 | 1861.4 | 1861.4 |
| gdb 413  | 1867.5 <sup>a</sup> | 1888.9 | 1869.4 | 1876.0 | 1883.3 | 1877.4 | 1870.7 | 1873.4 | 1873.4 | 1873.4 | 1865.5 | 1865.5 | 1865.5 |
| gdb 414  | 1863.2 <sup>a</sup> | 1872.9 | 1857.3 | 1862.1 | 1871.9 | 1866.1 | 1861.4 | 1865.8 | 1865.8 | 1865.8 | 1858.1 | 1858.1 | 1858.1 |
| gdb 415  | 1864.6 <sup>a</sup> | 1872.3 | 1853.5 | 1860.8 | 1871.2 | 1866.8 | 1861.2 | 1864.3 | 1864.3 | 1864.3 | 1858.4 | 1858.4 | 1858.4 |
| gdb 416  | 1862.2 <sup>a</sup> | 1878.4 | 1859.1 | 1865.6 | 1877.7 | 1869.3 | 1860.2 | 1865.2 | 1865.2 | 1865.2 | 1859.7 | 1859.7 | 1859.7 |
| gdb 417  | 1869.9 <sup>a</sup> | 1872.9 | 1855.4 | 1861.2 | 1867.8 | 1866.7 | 1865.9 | 1868.1 | 1868.1 | 1868.1 | 1858.7 | 1858.7 | 1858.7 |
| gdb 418  | 1867.0 <sup>a</sup> | 1871.0 | 1859.9 | 1861.4 | 1871.3 | 1866.2 | 1860.5 | 1862.5 | 1862.5 | 1862.5 | 1855.4 | 1855.4 | 1855.4 |
| gdb 419  | 1868.1 <sup>a</sup> | 1870.7 | 1856.3 | 1859.6 | 1871.1 | 1867.2 | 1861.0 | 1861.7 | 1861.7 | 1861.7 | 1856.2 | 1856.2 | 1856.2 |
| gdb 420  | 1865.1 <sup>a</sup> | 1875.3 | 1863.9 | 1864.4 | 1880.6 | 1871.6 | 1861.2 | 1863.9 | 1863.9 | 1863.9 | 1858.3 | 1858.3 | 1858.3 |
| gdb 421  | 1874.7 <sup>a</sup> | 1871.7 | 1858.6 | 1860.6 | 1869.4 | 1867.7 | 1865.8 | 1866.3 | 1866.3 | 1866.3 | 1857.5 | 1857.5 | 1857.5 |
| gdb 422  | 1865.9 <sup>a</sup> | 1871.0 | 1859.0 | 1860.9 | 1874.1 | 1868.2 | 1861.4 | 1862.9 | 1862.9 | 1862.9 | 1856.9 | 1856.9 | 1856.9 |
| gdb 423  | 1866.7 <sup>a</sup> | 1872.0 | 1860.6 | 1861.3 | 1872.8 | 1867.2 | 1861.5 | 1863.6 | 1863.6 | 1863.6 | 1856.5 | 1856.5 | 1856.5 |
| gdb 424  | 1869.8 <sup>a</sup> | 1877.2 | 1872.9 | 1869.4 | 1878.4 | 1874.7 | 1866.4 | 1868.0 | 1868.0 | 1868.0 | 1860.7 | 1860.7 | 1860.7 |
| gdb 425  | 1872.4 <sup>a</sup> | 1881.9 | 1878.6 | 1872.9 | 1886.7 | 1880.2 | 1869.0 | 1871.4 | 1871.4 | 1871.4 | 1864.8 | 1864.8 | 1864.8 |
| gdb 426  | 1871.3 <sup>a</sup> | 1876.6 | 1872.5 | 1868.6 | 1878.7 | 1875.5 | 1866.6 | 1868.1 | 1868.1 | 1868.1 | 1861.0 | 1861.0 | 1861.0 |
| gdb 427  | 1870.3 <sup>a</sup> | 1875.7 | 1872.8 | 1868.0 | 1878.3 | 1874.9 | 1865.2 | 1867.7 | 1867.7 | 1867.7 | 1860.4 | 1860.4 | 1860.4 |
| gdb 428  | 1846.2 <sup>a</sup> | 1840.6 | 1822.7 | 1827.7 | 1841.5 | 1839.2 | 1840.0 | 1840.3 | 1840.3 | 1840.3 | 1830.4 | 1830.4 | 1830.4 |
| gdb 429  | 1847.2 <sup>a</sup> | 1841.9 | 1822.0 | 1827.6 | 1841.6 | 1840.1 | 1841.3 | 1842.2 | 1842.2 | 1842.2 | 1832.1 | 1832.1 | 1832.1 |
| gdb 430  | 1860.6 <sup>a</sup> | 1850.3 | 1830.7 | 1840.9 | 1854.8 | 1847.6 | 1843.8 | 1851.9 | 1851.9 | 1851.9 | 1844.2 | 1844.2 | 1844.2 |
| gdb 431  | 1859.5 <sup>a</sup> | 1850.6 | 1832.9 | 1841.7 | 1855.7 | 1847.7 | 1842.2 | 1850.5 | 1850.5 | 1850.5 | 1843.0 | 1843.0 | 1843.0 |
| gdb 432  | 1863.2 <sup>a</sup> | 1852.0 | 1831.2 | 1842.2 | 1856.3 | 1849.8 | 1846.3 | 1854.6 | 1854.6 | 1854.6 | 1845.9 | 1845.9 | 1845.9 |
| gdb 433  | 1859.5 <sup>a</sup> | 1872.6 | 1858.0 | 1859.2 | 1874.8 | 1865.3 | 1856.8 | 1862.4 | 1862.4 | 1862.4 | 1855.8 | 1855.7 | 1855.7 |
| gdb 434  | 1867.4 <sup>a</sup> | 1869.4 | 1854.2 | 1857.5 | 1868.9 | 1864.4 | 1860.9 | 1864.7 | 1864.7 | 1864.7 | 1857.4 | 1857.4 | 1857.4 |
| gdb 435  | 1864.1 <sup>a</sup> | 1869.7 | 1852.8 | 1856.6 | 1867.7 | 1862.3 | 1859.2 | 1861.0 | 1861.0 | 1861.0 | 1854.8 | 1854.8 | 1854.8 |
| gdb 436  | 1865.6 <sup>a</sup> | 1870.1 | 1857.1 | 1858.2 | 1869.1 | 1862.8 | 1860.7 | 1863.3 | 1863.3 | 1863.3 | 1856.4 | 1856.3 | 1856.3 |
| gdb 437  | 1862.9 <sup>a</sup> | 1869.6 | 1855.2 | 1858.0 | 1869.1 | 1862.9 | 1858.2 | 1860.2 | 1860.2 | 1860.2 | 1853.9 | 1853.9 | 1853.9 |
| gdb 438  | 1872.1 <sup>a</sup> | 1869.9 | 1853.2 | 1857.3 | 1863.9 | 1863.4 | 1864.1 | 1864.8 | 1864.8 | 1864.8 | 1855.6 | 1855.6 | 1855.6 |
| gdb 439  | 1849.1 <sup>a</sup> | 1865.3 | 1836.2 | 1848.1 | 1862.7 | 1851.8 | 1838.9 | 1841.9 | 1841.8 | 1841.8 | 1836.3 | 1836.3 | 1836.3 |
| gdb 440  | 1849.8 <sup>a</sup> | 1867.0 | 1838.4 | 1850.4 | 1860.6 | 1853.3 | 1843.9 | 1845.4 | 1845.4 | 1845.4 | 1837.4 | 1837.4 | 1837.4 |
| gdb 441  | 1848.1 <sup>a</sup> | 1866.3 | 1840.1 | 1850.9 | 1861.3 | 1853.2 | 1842.6 | 1843.7 | 1843.7 | 1843.7 | 1835.9 | 1835.9 | 1835.9 |
| gdb 442  | 1873.1 <sup>a</sup> | 1884.0 | 1878.1 | 1873.3 | 1880.4 | 1878.1 | 1870.6 | 1871.3 | 1871.3 | 1871.3 | 1864.2 | 1864.2 | 1864.2 |
| gdb 443  | 1874.0 <sup>a</sup> | 1883.7 | 1878.3 | 1873.3 | 1880.8 | 1878.2 | 1870.4 | 1871.7 | 1871.7 | 1871.7 | 1864.7 | 1864.7 | 1864.7 |
| gdb 444  | 1857.5 <sup>a</sup> | 1847.1 | 1833.4 | 1839.4 | 1854.8 | 1847.0 | 1843.0 | 1848.8 | 1848.8 | 1848.8 | 1841.8 | 1841.8 | 1841.8 |
| gdb 445  | 1859.5 <sup>a</sup> | 1848.4 | 1832.4 | 1840.6 | 1855.5 | 1848.0 | 1844.9 | 1850.4 | 1850.3 | 1850.3 | 1842.3 | 1842.3 | 1842.3 |
| gdb 446  | 1855.9 <sup>a</sup> | 1873.2 | 1862.3 | 1861.3 | 1874.5 | 1864.2 | 1856.8 | 1859.8 | 1859.8 | 1859.8 | 1852.9 | 1852.9 | 1852.9 |
| gdb 447  | 1860.4 <sup>a</sup> | 1869.5 | 1857.3 | 1858.1 | 1868.4 | 1862.1 | 1859.3 | 1858.3 | 1858.3 | 1858.3 | 1852.7 | 1852.7 | 1852.7 |
| gdb 448  | 1864.1 <sup>a</sup> | 1870.0 | 1859.4 | 1858.6 | 1869.1 | 1862.4 | 1861.6 | 1861.2 | 1861.2 | 1861.2 | 1855.1 | 1855.1 | 1855.1 |
| gdb 449  | 1845.8 <sup>a</sup> | 1861.5 | 1832.3 | 1843.0 | 1854.1 | 1846.7 | 1840.4 | 1839.0 | 1839.0 | 1839.0 | 1831.7 | 1831.7 | 1831.7 |

... continued on next page ...

Table S26: ... continued from previous page. ...

| Molecule | Ref.                | MNDO   | AMI    | PM3    | PM6    | PM7    | OM1    | OM2    | OM3    | OM3    | OM3    | D3     | D3T    |
|----------|---------------------|--------|--------|--------|--------|--------|--------|--------|--------|--------|--------|--------|--------|
| gdb 450  | 1843.6 <sup>a</sup> | 1859.7 | 1830.5 | 1841.6 | 1854.5 | 1846.1 | 1837.9 | 1834.5 | 1834.5 | 1829.7 | 1829.7 | 1829.7 | 1829.7 |
| gdb 451  | 1841.2 <sup>a</sup> | 1860.7 | 1833.7 | 1842.2 | 1854.3 | 1845.3 | 1838.8 | 1836.5 | 1836.4 | 1829.9 | 1829.8 | 1829.8 | 1829.8 |
| gdb 452  | 1849.3 <sup>a</sup> | 1862.6 | 1834.4 | 1845.4 | 1853.9 | 1850.7 | 1846.7 | 1845.4 | 1845.3 | 1835.8 | 1835.7 | 1835.7 | 1835.7 |
| gdb 453  | 1845.5 <sup>a</sup> | 1845.2 | 1825.5 | 1829.6 | 1842.7 | 1840.6 | 1843.4 | 1840.6 | 1840.6 | 1831.3 | 1831.3 | 1831.3 | 1831.3 |
| gdb 454  | 1845.3 <sup>a</sup> | 1844.9 | 1826.5 | 1829.7 | 1842.8 | 1839.9 | 1842.8 | 1839.5 | 1839.5 | 1831.0 | 1830.9 | 1830.9 | 1830.9 |
| gdb 455  | 1846.0 <sup>a</sup> | 1857.5 | 1828.9 | 1841.7 | 1855.1 | 1847.5 | 1840.0 | 1838.5 | 1838.5 | 1833.0 | 1833.0 | 1833.0 | 1833.0 |
| gdb 456  | 1848.5 <sup>a</sup> | 1860.9 | 1835.1 | 1845.0 | 1853.8 | 1849.4 | 1846.1 | 1845.5 | 1845.5 | 1836.2 | 1836.1 | 1836.1 | 1836.1 |
| gdb 457  | 1860.9 <sup>a</sup> | 1849.6 | 1833.8 | 1842.1 | 1856.8 | 1849.4 | 1846.1 | 1852.4 | 1852.4 | 1844.3 | 1844.3 | 1844.3 | 1844.3 |
| gdb 458  | 1858.6 <sup>a</sup> | 1846.8 | 1831.5 | 1838.8 | 1854.2 | 1846.8 | 1843.7 | 1850.7 | 1850.7 | 1843.6 | 1843.6 | 1843.6 | 1843.6 |
| gdb 459  | 1860.8 <sup>a</sup> | 1870.5 | 1857.4 | 1859.5 | 1876.1 | 1866.8 | 1860.7 | 1865.1 | 1865.1 | 1858.5 | 1858.5 | 1858.5 | 1858.5 |
| gdb 460  | 1862.3 <sup>a</sup> | 1867.1 | 1854.4 | 1856.7 | 1869.0 | 1863.2 | 1861.5 | 1862.3 | 1862.3 | 1855.8 | 1855.8 | 1855.8 | 1855.8 |
| gdb 461  | 1869.8 <sup>a</sup> | 1865.7 | 1854.9 | 1856.7 | 1864.3 | 1862.6 | 1864.2 | 1863.3 | 1863.3 | 1854.8 | 1854.8 | 1854.8 | 1854.8 |
| gdb 462  | 1847.2 <sup>a</sup> | 1863.9 | 1837.0 | 1848.1 | 1862.3 | 1851.2 | 1839.2 | 1839.5 | 1839.4 | 1834.3 | 1834.3 | 1834.3 | 1834.3 |
| gdb 463  | 1845.6 <sup>a</sup> | 1865.8 | 1840.6 | 1849.9 | 1860.2 | 1852.1 | 1843.4 | 1841.5 | 1841.5 | 1834.1 | 1834.1 | 1834.1 | 1834.1 |
| gdb 464  | 1846.1 <sup>a</sup> | 1865.5 | 1841.3 | 1850.7 | 1860.8 | 1852.4 | 1842.9 | 1841.5 | 1841.5 | 1834.6 | 1834.6 | 1834.6 | 1834.6 |
| gdb 465  | 1847.8 <sup>a</sup> | 1866.3 | 1839.9 | 1850.9 | 1861.3 | 1853.7 | 1845.0 | 1843.6 | 1843.9 | 1836.5 | 1836.5 | 1836.5 | 1836.5 |
| gdb 466  | 1844.5 <sup>a</sup> | 1859.5 | 1831.7 | 1841.7 | 1854.9 | 1846.5 | 1841.8 | 1841.2 | 1841.1 | 1833.6 | 1833.5 | 1833.5 | 1833.5 |
| gdb 467  | 1844.5 <sup>a</sup> | 1857.7 | 1829.6 | 1840.9 | 1853.7 | 1846.1 | 1838.7 | 1836.9 | 1836.9 | 1831.5 | 1831.5 | 1831.5 | 1831.5 |
| gdb 468  | 1846.3 <sup>a</sup> | 1859.3 | 1830.1 | 1841.1 | 1852.7 | 1845.7 | 1841.2 | 1841.3 | 1841.2 | 1833.3 | 1833.3 | 1833.3 | 1833.3 |
| gdb 469  | 1847.8 <sup>a</sup> | 1860.7 | 1833.9 | 1843.9 | 1852.8 | 1848.9 | 1846.2 | 1845.4 | 1845.4 | 1835.7 | 1835.6 | 1835.6 | 1835.6 |
| gdb 470  | 1865.5 <sup>a</sup> | 1865.8 | 1853.5 | 1856.1 | 1867.7 | 1863.5 | 1863.0 | 1865.1 | 1865.1 | 1857.4 | 1857.4 | 1857.4 | 1857.4 |
| gdb 471  | 1869.2 <sup>a</sup> | 1866.0 | 1854.7 | 1856.3 | 1863.5 | 1862.2 | 1864.2 | 1863.2 | 1863.2 | 1854.3 | 1854.3 | 1854.3 | 1854.3 |
| gdb 472  | 1861.2 <sup>a</sup> | 1866.1 | 1855.6 | 1856.7 | 1868.0 | 1862.0 | 1859.2 | 1859.8 | 1859.8 | 1853.8 | 1853.8 | 1853.8 | 1853.8 |
| gdb 473  | 1865.1 <sup>a</sup> | 1865.9 | 1856.6 | 1856.0 | 1869.8 | 1863.9 | 1864.1 | 1865.7 | 1865.7 | 1858.4 | 1858.4 | 1858.4 | 1858.4 |
| gdb 474  | 1873.0 <sup>a</sup> | 1878.9 | 1874.0 | 1869.5 | 1878.0 | 1875.7 | 1872.2 | 1871.5 | 1871.5 | 1864.2 | 1864.2 | 1864.2 | 1864.2 |
| gdb 475  | 1872.0 <sup>a</sup> | 1878.3 | 1875.8 | 1870.1 | 1878.1 | 1875.2 | 1869.4 | 1869.5 | 1869.5 | 1862.4 | 1862.4 | 1862.4 | 1862.4 |
| gdb 476  | 1872.9 <sup>a</sup> | 1879.4 | 1873.7 | 1869.1 | 1877.5 | 1875.2 | 1871.9 | 1871.5 | 1871.5 | 1864.0 | 1864.0 | 1864.0 | 1864.0 |
| gdb 477  | 1861.7 <sup>a</sup> | 1864.9 | 1839.0 | 1853.7 | 1868.3 | 1855.9 | 1845.5 | 1852.6 | 1852.5 | 1847.4 | 1847.4 | 1847.4 | 1847.4 |
| gdb 478  | 1862.7 <sup>a</sup> | 1867.5 | 1838.2 | 1854.9 | 1867.0 | 1855.9 | 1845.5 | 1853.1 | 1853.1 | 1846.7 | 1846.7 | 1846.7 | 1846.7 |
| gdb 479  | 1857.9 <sup>a</sup> | 1865.2 | 1840.5 | 1853.2 | 1866.9 | 1853.2 | 1841.9 | 1849.2 | 1849.2 | 1844.3 | 1844.3 | 1844.3 | 1844.3 |
| gdb 480  | 1860.2 <sup>a</sup> | 1867.4 | 1840.2 | 1854.7 | 1868.0 | 1854.8 | 1844.8 | 1851.4 | 1851.4 | 1845.5 | 1845.5 | 1845.5 | 1845.5 |
| gdb 481  | 1858.8 <sup>a</sup> | 1890.8 | 1870.1 | 1875.0 | 1883.2 | 1871.7 | 1860.2 | 1863.7 | 1863.6 | 1856.7 | 1856.7 | 1856.7 | 1856.7 |
| gdb 482  | 1860.0 <sup>a</sup> | 1885.1 | 1859.8 | 1868.4 | 1876.3 | 1866.3 | 1854.8 | 1853.7 | 1853.7 | 1851.4 | 1851.4 | 1851.4 | 1851.4 |
| gdb 483  | 1862.4 <sup>a</sup> | 1885.2 | 1862.0 | 1868.9 | 1878.9 | 1867.6 | 1857.7 | 1857.6 | 1857.6 | 1854.9 | 1854.9 | 1854.9 | 1854.9 |
| gdb 484  | 1858.7 <sup>a</sup> | 1886.2 | 1863.6 | 1870.1 | 1879.2 | 1867.2 | 1856.9 | 1856.7 | 1856.7 | 1853.0 | 1853.0 | 1853.0 | 1853.0 |
| gdb 485  | 1862.3 <sup>a</sup> | 1886.3 | 1865.8 | 1870.6 | 1880.4 | 1867.8 | 1859.1 | 1859.8 | 1859.8 | 1855.7 | 1855.7 | 1855.7 | 1855.7 |
| gdb 486  | 1865.4 <sup>a</sup> | 1865.9 | 1840.1 | 1856.1 | 1871.9 | 1859.5 | 1847.8 | 1856.5 | 1856.5 | 1850.4 | 1850.4 | 1850.4 | 1850.4 |
| gdb 487  | 1860.9 <sup>a</sup> | 1865.3 | 1841.2 | 1855.3 | 1868.8 | 1855.6 | 1844.3 | 1852.6 | 1852.6 | 1846.6 | 1846.6 | 1846.6 | 1846.6 |
| gdb 488  | 1862.4 <sup>a</sup> | 1864.7 | 1840.4 | 1854.6 | 1868.2 | 1856.1 | 1844.3 | 1854.3 | 1854.3 | 1849.0 | 1849.0 | 1849.0 | 1849.0 |
| gdb 489  | 1853.5 <sup>a</sup> | 1881.4 | 1846.0 | 1863.7 | 1873.5 | 1861.6 | 1844.7 | 1847.3 | 1847.3 | 1841.7 | 1841.7 | 1841.7 | 1841.7 |
| gdb 490  | 1849.1 <sup>a</sup> | 1881.8 | 1845.9 | 1863.3 | 1871.5 | 1859.1 | 1842.6 | 1843.9 | 1843.9 | 1838.4 | 1838.4 | 1838.4 | 1838.4 |
| gdb 491  | 1851.3 <sup>a</sup> | 1881.8 | 1847.8 | 1864.4 | 1876.4 | 1862.6 | 1845.0 | 1846.7 | 1846.7 | 1841.4 | 1841.4 | 1841.4 | 1841.4 |
| gdb 492  | 1850.4 <sup>a</sup> | 1882.9 | 1847.7 | 1864.7 | 1873.9 | 1861.1 | 1843.9 | 1845.8 | 1845.8 | 1840.4 | 1840.4 | 1840.4 | 1840.4 |
| gdb 493  | 1846.2 <sup>a</sup> | 1881.9 | 1848.7 | 1863.6 | 1872.7 | 1858.7 | 1842.0 | 1842.4 | 1842.4 | 1837.2 | 1837.2 | 1837.2 | 1837.2 |
| gdb 494  | 1845.8 <sup>a</sup> | 1881.3 | 1849.0 | 1863.9 | 1873.5 | 1859.1 | 1841.4 | 1842.5 | 1842.5 | 1837.4 | 1837.3 | 1837.3 | 1837.3 |

... continued on next page ...

Table S26: ... continued from previous page. ...

| Molecule | Ref.                | MNDO   | AMI    | PM3    | PM6    | PM7    | OM1    | OM2    |        | OM3    |        | D3     | D3T    |
|----------|---------------------|--------|--------|--------|--------|--------|--------|--------|--------|--------|--------|--------|--------|
|          |                     |        |        |        |        |        |        | D2     | D3     | D2     | D3     |        |        |
| gdb 495  | 1875.3 <sup>a</sup> | 1894.1 | 1883.5 | 1883.9 | 1891.7 | 1884.9 | 1871.3 | 1874.0 | 1874.0 | 1868.7 | 1868.6 | 1868.7 | 1868.7 |
| gdb 496  | 1875.4 <sup>a</sup> | 1891.8 | 1881.8 | 1883.0 | 1891.0 | 1884.1 | 1868.7 | 1872.5 | 1872.5 | 1866.7 | 1866.7 | 1866.7 | 1866.7 |
| gdb 497  | 1872.9 <sup>a</sup> | 1892.8 | 1885.2 | 1883.7 | 1890.3 | 1882.5 | 1867.9 | 1870.4 | 1870.4 | 1864.9 | 1864.9 | 1864.9 | 1864.9 |
| gdb 498  | 1875.3 <sup>a</sup> | 1895.0 | 1883.7 | 1883.5 | 1891.4 | 1884.7 | 1871.4 | 1874.5 | 1874.5 | 1868.7 | 1868.7 | 1868.7 | 1868.7 |
| gdb 499  | 1864.5 <sup>a</sup> | 1864.5 | 1855.0 | 1855.0 | 1870.1 | 1858.8 | 1847.8 | 1855.6 | 1855.6 | 1850.8 | 1850.8 | 1850.8 | 1850.8 |
| gdb 500  | 1863.2 <sup>a</sup> | 1864.1 | 1844.2 | 1853.9 | 1866.6 | 1854.3 | 1844.8 | 1852.1 | 1852.1 | 1847.0 | 1847.0 | 1847.0 | 1847.0 |
| gdb 501  | 1860.4 <sup>a</sup> | 1863.7 | 1845.4 | 1854.8 | 1871.4 | 1857.1 | 1843.5 | 1851.9 | 1851.9 | 1846.8 | 1846.8 | 1846.8 | 1846.8 |
| gdb 502  | 1866.1 <sup>a</sup> | 1871.0 | 1848.8 | 1858.4 | 1872.9 | 1862.0 | 1850.1 | 1857.0 | 1857.0 | 1851.0 | 1851.0 | 1851.0 | 1851.0 |
| gdb 503  | 1857.3 <sup>a</sup> | 1863.3 | 1847.4 | 1855.0 | 1870.5 | 1856.6 | 1842.9 | 1851.0 | 1851.0 | 1845.7 | 1845.7 | 1845.7 | 1845.7 |
| gdb 504  | 1855.5 <sup>a</sup> | 1866.6 | 1852.5 | 1857.7 | 1875.0 | 1863.1 | 1847.2 | 1857.9 | 1857.9 | 1849.5 | 1849.5 | 1849.5 | 1849.5 |
| gdb 505  | 1861.3 <sup>a</sup> | 1869.7 | 1851.5 | 1858.3 | 1873.9 | 1863.6 | 1847.9 | 1856.6 | 1856.6 | 1850.4 | 1850.4 | 1850.4 | 1850.4 |
| gdb 506  | 1853.3 <sup>a</sup> | 1860.6 | 1845.1 | 1852.1 | 1866.3 | 1853.9 | 1839.2 | 1846.6 | 1846.6 | 1841.7 | 1841.7 | 1841.7 | 1841.7 |
| gdb 507  | 1853.4 <sup>a</sup> | 1861.2 | 1845.6 | 1853.6 | 1871.2 | 1857.9 | 1841.4 | 1849.1 | 1849.1 | 1844.1 | 1844.1 | 1844.1 | 1844.1 |
| gdb 508  | 1853.7 <sup>a</sup> | 1861.4 | 1847.6 | 1854.0 | 1869.4 | 1856.5 | 1840.6 | 1847.9 | 1847.9 | 1842.6 | 1842.6 | 1842.6 | 1842.6 |
| gdb 509  | 1854.0 <sup>a</sup> | 1861.0 | 1844.0 | 1853.1 | 1866.6 | 1854.2 | 1839.8 | 1846.8 | 1846.8 | 1841.8 | 1841.8 | 1841.8 | 1841.8 |
| gdb 510  | 1854.2 <sup>a</sup> | 1861.1 | 1844.0 | 1852.7 | 1864.5 | 1853.0 | 1840.7 | 1846.7 | 1846.7 | 1842.1 | 1842.1 | 1842.1 | 1842.1 |
| gdb 511  | 1861.8 <sup>a</sup> | 1868.2 | 1846.6 | 1855.5 | 1868.8 | 1858.3 | 1844.3 | 1850.5 | 1850.5 | 1844.7 | 1844.7 | 1844.7 | 1844.7 |
| gdb 512  | 1876.0 <sup>a</sup> | 1871.7 | 1860.8 | 1868.5 | 1881.5 | 1872.5 | 1861.5 | 1873.5 | 1873.5 | 1868.3 | 1868.3 | 1868.3 | 1868.3 |
| gdb 513  | 1887.4 <sup>a</sup> | 1887.9 | 1877.0 | 1882.9 | 1895.7 | 1886.1 | 1876.2 | 1891.0 | 1891.0 | 1881.2 | 1881.2 | 1881.2 | 1881.2 |
| gdb 514  | 1881.2 <sup>a</sup> | 1877.2 | 1871.3 | 1874.7 | 1889.2 | 1878.2 | 1866.0 | 1879.4 | 1879.4 | 1871.3 | 1871.3 | 1871.3 | 1871.3 |
| gdb 515  | 1864.8 <sup>a</sup> | 1861.7 | 1851.4 | 1857.3 | 1872.0 | 1860.4 | 1850.7 | 1866.3 | 1866.3 | 1857.5 | 1857.5 | 1857.5 | 1857.5 |
| gdb 516  | 1853.0 <sup>a</sup> | 1842.6 | 1831.2 | 1840.7 | 1855.2 | 1844.6 | 1834.0 | 1844.4 | 1844.4 | 1839.9 | 1839.9 | 1839.9 | 1839.9 |
| gdb 517  | 1872.9 <sup>a</sup> | 1870.5 | 1859.6 | 1866.6 | 1879.2 | 1868.4 | 1856.7 | 1866.6 | 1866.6 | 1861.2 | 1861.2 | 1861.2 | 1861.2 |
| gdb 518  | 1874.2 <sup>a</sup> | 1870.6 | 1862.5 | 1867.8 | 1880.6 | 1869.8 | 1858.3 | 1867.9 | 1867.9 | 1862.6 | 1862.6 | 1862.6 | 1862.6 |
| gdb 519  | 1881.0 <sup>a</sup> | 1880.2 | 1865.5 | 1872.9 | 1885.2 | 1877.1 | 1866.9 | 1877.7 | 1877.7 | 1870.9 | 1870.9 | 1870.9 | 1870.9 |
| gdb 520  | 1873.3 <sup>a</sup> | 1870.1 | 1858.5 | 1866.1 | 1876.4 | 1866.8 | 1857.7 | 1867.2 | 1867.2 | 1862.1 | 1862.1 | 1862.1 | 1862.1 |
| gdb 521  | 1860.7 <sup>a</sup> | 1856.8 | 1847.5 | 1852.9 | 1866.8 | 1857.6 | 1846.0 | 1858.2 | 1858.2 | 1853.2 | 1853.2 | 1853.2 | 1853.2 |
| gdb 522  | 1867.9 <sup>a</sup> | 1863.4 | 1860.4 | 1860.9 | 1876.4 | 1864.7 | 1852.5 | 1866.4 | 1866.4 | 1858.1 | 1858.1 | 1858.1 | 1858.1 |
| gdb 523  | 1859.6 <sup>a</sup> | 1855.2 | 1845.7 | 1851.9 | 1865.8 | 1855.8 | 1843.4 | 1853.2 | 1853.2 | 1848.6 | 1848.6 | 1848.6 | 1848.6 |
| gdb 524  | 1860.6 <sup>a</sup> | 1854.8 | 1846.8 | 1852.0 | 1863.3 | 1854.1 | 1842.8 | 1852.3 | 1852.3 | 1847.2 | 1847.2 | 1847.2 | 1847.2 |
| gdb 525  | 1863.5 <sup>a</sup> | 1856.2 | 1846.5 | 1851.8 | 1864.7 | 1856.5 | 1846.0 | 1856.5 | 1856.5 | 1850.2 | 1850.2 | 1850.2 | 1850.2 |
| gdb 526  | 1866.0 <sup>a</sup> | 1892.6 | 1868.8 | 1878.6 | 1888.2 | 1877.0 | 1863.7 | 1873.6 | 1873.6 | 1865.4 | 1865.4 | 1865.4 | 1865.4 |
| gdb 527  | 1865.0 <sup>a</sup> | 1884.8 | 1859.8 | 1872.2 | 1881.8 | 1870.7 | 1856.7 | 1862.9 | 1862.9 | 1858.5 | 1858.5 | 1858.5 | 1858.5 |
| gdb 528  | 1861.8 <sup>a</sup> | 1884.1 | 1862.9 | 1872.8 | 1882.6 | 1870.7 | 1855.5 | 1861.6 | 1861.6 | 1856.8 | 1856.8 | 1856.8 | 1856.8 |
| gdb 529  | 1865.0 <sup>a</sup> | 1881.1 | 1855.5 | 1868.2 | 1877.3 | 1866.4 | 1851.6 | 1855.6 | 1855.6 | 1852.0 | 1852.0 | 1852.0 | 1852.0 |
| gdb 530  | 1845.6 <sup>a</sup> | 1856.2 | 1833.1 | 1842.9 | 1855.8 | 1843.8 | 1832.7 | 1838.9 | 1838.9 | 1834.6 | 1834.6 | 1834.6 | 1834.6 |
| gdb 531  | 1873.4 <sup>a</sup> | 1900.4 | 1873.8 | 1884.2 | 1892.5 | 1880.9 | 1869.7 | 1873.5 | 1873.5 | 1867.9 | 1867.9 | 1867.9 | 1867.9 |
| gdb 532  | 1873.7 <sup>a</sup> | 1900.8 | 1874.3 | 1884.5 | 1892.5 | 1880.9 | 1869.6 | 1873.7 | 1873.7 | 1868.1 | 1868.1 | 1868.1 | 1868.1 |
| gdb 533  | 1870.4 <sup>a</sup> | 1898.3 | 1870.5 | 1881.2 | 1888.5 | 1876.5 | 1865.3 | 1867.0 | 1867.0 | 1862.1 | 1862.1 | 1862.1 | 1862.1 |
| gdb 534  | 1843.4 <sup>a</sup> | 1852.8 | 1830.3 | 1840.8 | 1854.4 | 1841.3 | 1828.8 | 1833.5 | 1833.5 | 1829.3 | 1829.3 | 1829.3 | 1829.3 |
| gdb 535  | 1868.9 <sup>a</sup> | 1895.7 | 1872.8 | 1881.3 | 1890.1 | 1878.4 | 1864.9 | 1868.6 | 1868.6 | 1863.7 | 1863.7 | 1863.7 | 1863.7 |
| gdb 536  | 1873.4 <sup>a</sup> | 1897.0 | 1871.3 | 1881.7 | 1890.6 | 1879.8 | 1868.3 | 1872.4 | 1872.4 | 1867.3 | 1867.3 | 1867.3 | 1867.3 |
| gdb 537  | 1872.7 <sup>a</sup> | 1905.4 | 1882.0 | 1889.0 | 1896.7 | 1885.0 | 1873.9 | 1881.0 | 1881.0 | 1872.1 | 1872.1 | 1872.1 | 1872.1 |
| gdb 538  | 1869.9 <sup>a</sup> | 1893.0 | 1866.9 | 1877.4 | 1885.9 | 1875.2 | 1862.5 | 1865.4 | 1865.4 | 1861.0 | 1861.0 | 1861.0 | 1861.0 |
| gdb 539  | 1869.1 <sup>a</sup> | 1896.4 | 1871.6 | 1881.3 | 1890.5 | 1879.0 | 1866.7 | 1870.4 | 1870.4 | 1865.3 | 1865.3 | 1865.3 | 1865.3 |

... continued on next page ...

Table S26: . . . continued from previous page. . . .

| Molecule | Ref.                | MNDO   | AMI    | PM3    | PM6    | PM7    | OM1    | OM2    |        | OM3    |        | D3T    |
|----------|---------------------|--------|--------|--------|--------|--------|--------|--------|--------|--------|--------|--------|
|          |                     |        |        |        |        |        |        | D2     | D3     | D2     | D3     |        |
| gdb 540  | 1867.3 <sup>a</sup> | 1895.5 | 1872.2 | 1880.7 | 1888.9 | 1877.1 | 1863.9 | 1868.0 | 1868.0 | 1862.9 | 1862.9 | 1862.9 |
| gdb 541  | 1869.9 <sup>a</sup> | 1897.2 | 1872.1 | 1881.4 | 1888.7 | 1877.2 | 1866.4 | 1870.4 | 1870.4 | 1864.9 | 1864.8 | 1864.8 |
| gdb 542  | 1866.8 <sup>a</sup> | 1895.9 | 1873.8 | 1881.2 | 1889.4 | 1876.8 | 1863.9 | 1867.4 | 1867.4 | 1862.4 | 1862.3 | 1862.3 |
| gdb 543  | 1868.6 <sup>a</sup> | 1896.8 | 1873.2 | 1881.9 | 1891.2 | 1878.9 | 1866.5 | 1869.7 | 1869.7 | 1864.7 | 1864.6 | 1864.6 |
| gdb 544  | 1891.2 <sup>a</sup> | 1912.7 | 1908.8 | 1903.0 | 1907.5 | 1901.1 | 1891.1 | 1896.2 | 1896.2 | 1891.7 | 1891.7 | 1891.7 |
| gdb 545  | 1874.4 <sup>a</sup> | 1898.5 | 1889.8 | 1884.6 | 1896.3 | 1888.0 | 1875.7 | 1877.8 | 1877.8 | 1869.9 | 1869.9 | 1869.9 |
| gdb 546  | 1868.1 <sup>a</sup> | 1890.3 | 1879.8 | 1877.6 | 1889.0 | 1880.4 | 1866.7 | 1867.0 | 1867.0 | 1862.3 | 1862.3 | 1862.3 |
| gdb 547  | 1866.5 <sup>a</sup> | 1890.0 | 1879.3 | 1876.9 | 1886.8 | 1878.3 | 1864.4 | 1864.7 | 1864.7 | 1860.1 | 1860.1 | 1860.1 |
| gdb 548  | 1889.5 <sup>a</sup> | 1896.7 | 1891.7 | 1893.1 | 1903.0 | 1893.7 | 1883.5 | 1895.1 | 1895.1 | 1885.2 | 1885.2 | 1885.2 |
| gdb 549  | 1885.5 <sup>a</sup> | 1883.7 | 1879.2 | 1881.9 | 1892.4 | 1883.7 | 1872.3 | 1880.1 | 1880.1 | 1874.1 | 1874.1 | 1874.1 |
| gdb 550  | 1888.9 <sup>a</sup> | 1889.8 | 1880.3 | 1884.5 | 1894.5 | 1887.1 | 1876.6 | 1884.1 | 1884.1 | 1877.8 | 1877.8 | 1877.8 |
| gdb 551  | 1885.2 <sup>a</sup> | 1883.8 | 1879.0 | 1881.6 | 1891.7 | 1883.0 | 1871.5 | 1879.4 | 1879.3 | 1873.2 | 1873.2 | 1873.2 |
| gdb 552  | 1869.7 <sup>a</sup> | 1904.5 | 1887.0 | 1890.7 | 1898.1 | 1886.4 | 1875.0 | 1880.3 | 1880.3 | 1871.2 | 1871.2 | 1871.2 |
| gdb 553  | 1868.4 <sup>a</sup> | 1895.6 | 1875.5 | 1882.1 | 1890.0 | 1878.8 | 1867.2 | 1869.0 | 1869.0 | 1863.7 | 1863.7 | 1863.7 |
| gdb 554  | 1867.8 <sup>a</sup> | 1894.7 | 1876.3 | 1881.7 | 1889.5 | 1877.7 | 1865.9 | 1867.6 | 1867.6 | 1862.8 | 1862.8 | 1862.8 |
| gdb 555  | 1868.7 <sup>a</sup> | 1895.7 | 1875.8 | 1882.5 | 1891.2 | 1879.7 | 1868.2 | 1869.9 | 1869.9 | 1864.8 | 1864.8 | 1864.8 |
| gdb 556  | 1863.1 <sup>a</sup> | 1884.8 | 1865.5 | 1869.0 | 1877.0 | 1866.8 | 1858.3 | 1861.3 | 1861.3 | 1855.1 | 1855.0 | 1855.0 |
| gdb 557  | 1856.9 <sup>a</sup> | 1873.1 | 1850.5 | 1858.3 | 1867.1 | 1857.6 | 1847.0 | 1846.0 | 1846.0 | 1844.2 | 1844.2 | 1844.2 |
| gdb 558  | 1856.2 <sup>a</sup> | 1872.4 | 1854.5 | 1860.3 | 1870.8 | 1858.8 | 1847.9 | 1848.6 | 1848.6 | 1845.8 | 1845.8 | 1845.8 |
| gdb 559  | 1870.3 <sup>a</sup> | 1899.7 | 1877.9 | 1885.1 | 1894.2 | 1883.9 | 1872.8 | 1874.9 | 1874.9 | 1868.9 | 1868.8 | 1868.8 |
| gdb 560  | 1865.0 <sup>a</sup> | 1896.8 | 1872.7 | 1880.2 | 1885.2 | 1874.9 | 1864.1 | 1862.8 | 1862.8 | 1857.8 | 1857.8 | 1857.8 |
| gdb 561  | 1871.5 <sup>a</sup> | 1898.3 | 1876.7 | 1883.8 | 1892.7 | 1880.9 | 1869.2 | 1868.3 | 1868.3 | 1863.8 | 1863.8 | 1863.8 |
| gdb 562  | 1870.1 <sup>a</sup> | 1898.3 | 1877.0 | 1884.0 | 1893.3 | 1881.5 | 1869.4 | 1868.7 | 1868.7 | 1864.3 | 1864.3 | 1864.3 |
| gdb 563  | 1872.7 <sup>a</sup> | 1884.9 | 1865.4 | 1872.5 | 1884.1 | 1873.8 | 1861.5 | 1864.1 | 1864.1 | 1858.5 | 1858.5 | 1858.5 |
| gdb 564  | 1868.4 <sup>a</sup> | 1882.1 | 1867.6 | 1873.9 | 1886.0 | 1875.5 | 1861.7 | 1866.9 | 1866.9 | 1860.9 | 1860.9 | 1860.9 |
| gdb 565  | 1872.8 <sup>a</sup> | 1884.6 | 1866.6 | 1873.2 | 1887.6 | 1876.2 | 1862.8 | 1865.6 | 1865.6 | 1860.1 | 1860.1 | 1860.1 |
| gdb 566  | 1899.5 <sup>a</sup> | 1894.0 | 1894.5 | 1893.4 | 1903.0 | 1897.2 | 1888.2 | 1900.2 | 1900.2 | 1893.5 | 1893.5 | 1893.5 |
| gdb 567  | 1906.6 <sup>a</sup> | 1899.3 | 1902.7 | 1900.0 | 1909.8 | 1902.1 | 1894.6 | 1907.9 | 1907.9 | 1898.6 | 1898.5 | 1898.5 |
| gdb 568  | 1898.2 <sup>a</sup> | 1892.6 | 1895.8 | 1893.8 | 1902.9 | 1896.1 | 1887.2 | 1898.9 | 1898.9 | 1892.6 | 1892.6 | 1892.6 |
| gdb 569  | 1897.1 <sup>a</sup> | 1892.2 | 1894.8 | 1893.4 | 1900.6 | 1894.4 | 1885.9 | 1897.4 | 1897.3 | 1891.0 | 1891.0 | 1891.0 |
| gdb 570  | 1899.2 <sup>a</sup> | 1892.9 | 1896.8 | 1894.3 | 1905.6 | 1898.1 | 1889.1 | 1901.2 | 1901.2 | 1895.0 | 1895.0 | 1895.0 |
| gdb 571  | 1877.5 <sup>a</sup> | 1896.3 | 1885.5 | 1885.7 | 1893.5 | 1884.0 | 1876.1 | 1880.2 | 1880.2 | 1876.8 | 1876.7 | 1876.7 |
| gdb 572  | 1881.0 <sup>a</sup> | 1896.8 | 1887.9 | 1886.4 | 1895.3 | 1885.1 | 1878.8 | 1883.0 | 1883.0 | 1879.4 | 1879.4 | 1879.4 |
| gdb 573  | 1881.4 <sup>a</sup> | 1896.0 | 1885.3 | 1884.9 | 1893.2 | 1884.0 | 1878.2 | 1882.3 | 1882.3 | 1879.0 | 1879.0 | 1879.0 |
| gdb 574  | 1878.6 <sup>a</sup> | 1895.6 | 1883.4 | 1884.6 | 1892.6 | 1883.7 | 1876.6 | 1880.3 | 1880.3 | 1877.7 | 1877.6 | 1877.6 |
| gdb 575  | 1881.8 <sup>a</sup> | 1900.0 | 1888.6 | 1887.5 | 1894.3 | 1885.2 | 1878.2 | 1883.0 | 1883.0 | 1877.3 | 1877.3 | 1877.3 |
| gdb 576  | 1883.7 <sup>a</sup> | 1897.0 | 1889.7 | 1886.6 | 1895.5 | 1884.9 | 1880.6 | 1885.3 | 1885.3 | 1881.3 | 1881.3 | 1881.3 |
| gdb 577  | 1881.0 <sup>a</sup> | 1886.3 | 1878.7 | 1879.5 | 1889.7 | 1880.5 | 1870.6 | 1879.6 | 1879.6 | 1871.4 | 1871.4 | 1871.4 |
| gdb 578  | 1875.7 <sup>a</sup> | 1879.2 | 1869.8 | 1872.4 | 1885.1 | 1874.5 | 1864.9 | 1873.4 | 1873.4 | 1868.6 | 1868.5 | 1868.5 |
| gdb 579  | 1876.6 <sup>a</sup> | 1878.9 | 1870.2 | 1871.8 | 1884.5 | 1873.6 | 1865.0 | 1873.6 | 1873.6 | 1869.1 | 1869.1 | 1869.1 |
| gdb 580  | 1867.5 <sup>a</sup> | 1879.8 | 1872.4 | 1880.4 | 1880.4 | 1872.8 | 1861.9 | 1862.2 | 1862.2 | 1858.0 | 1858.0 | 1858.0 |
| gdb 581  | 1864.9 <sup>a</sup> | 1879.8 | 1874.3 | 1870.8 | 1882.8 | 1874.2 | 1861.8 | 1861.6 | 1861.6 | 1857.1 | 1857.1 | 1857.1 |
| gdb 582  | 1864.2 <sup>a</sup> | 1879.2 | 1873.5 | 1870.6 | 1881.8 | 1872.6 | 1859.9 | 1860.7 | 1860.7 | 1855.9 | 1855.9 | 1855.9 |
| gdb 583  | 1897.5 <sup>a</sup> | 1911.1 | 1913.1 | 1903.3 | 1912.9 | 1906.3 | 1897.0 | 1902.2 | 1902.2 | 1895.0 | 1895.0 | 1895.0 |
| gdb 584  | 1896.8 <sup>a</sup> | 1907.3 | 1911.2 | 1900.9 | 1913.0 | 1907.5 | 1899.1 | 1902.8 | 1902.8 | 1895.3 | 1895.3 | 1895.3 |

. . . continued on next page . . .



Table S26: ... continued from previous page. ...

| Molecule | Ref.                | MNDO   | AMI    | PM3    | PM6    | PM7    | OM1    | OM2    |        | OM3    |        | D3T    |
|----------|---------------------|--------|--------|--------|--------|--------|--------|--------|--------|--------|--------|--------|
|          |                     |        |        |        |        |        |        | D2     | D3     | D2     | D3     |        |
| gdb 585  | 1891.8 <sup>a</sup> | 1904.8 | 1909.3 | 1900.0 | 1908.7 | 1900.9 | 1890.7 | 1896.2 | 1896.2 | 1888.6 | 1888.6 | 1888.6 |
| gdb 586  | 1886.0 <sup>a</sup> | 1898.0 | 1902.3 | 1894.7 | 1905.1 | 1898.6 | 1887.4 | 1892.1 | 1892.1 | 1887.3 | 1887.3 | 1887.3 |
| gdb 587  | 1894.9 <sup>a</sup> | 1908.8 | 1912.5 | 1902.0 | 1912.3 | 1906.1 | 1896.8 | 1902.6 | 1902.6 | 1894.5 | 1894.5 | 1894.5 |
| gdb 588  | 1894.0 <sup>a</sup> | 1908.1 | 1910.9 | 1900.8 | 1910.5 | 1904.1 | 1895.3 | 1901.7 | 1901.7 | 1893.2 | 1893.2 | 1893.2 |
| gdb 589  | 1910.5 <sup>a</sup> | 1910.5 | 1913.2 | 1910.5 | 1919.4 | 1911.3 | 1905.1 | 1918.0 | 1918.0 | 1908.8 | 1908.8 | 1908.8 |
| gdb 590  | 1912.2 <sup>a</sup> | 1904.9 | 1909.4 | 1906.1 | 1918.4 | 1910.7 | 1903.2 | 1916.4 | 1916.4 | 1907.8 | 1907.8 | 1907.8 |
| gdb 591  | 1906.1 <sup>a</sup> | 1906.1 | 1907.0 | 1905.3 | 1915.2 | 1908.3 | 1900.8 | 1912.2 | 1912.2 | 1905.7 | 1905.7 | 1905.7 |
| gdb 592  | 1905.7 <sup>a</sup> | 1901.5 | 1905.1 | 1903.1 | 1913.6 | 1906.8 | 1898.0 | 1909.9 | 1909.9 | 1903.9 | 1903.9 | 1903.9 |
| gdb 593  | 1911.3 <sup>a</sup> | 1905.8 | 1910.8 | 1907.7 | 1916.3 | 1908.3 | 1901.2 | 1913.6 | 1913.6 | 1905.2 | 1905.2 | 1905.2 |
| gdb 594  | 1899.2 <sup>a</sup> | 1908.4 | 1914.8 | 1904.9 | 1916.0 | 1909.7 | 1895.8 | 1902.3 | 1902.3 | 1894.4 | 1894.4 | 1894.4 |
| gdb 595  | 1899.8 <sup>a</sup> | 1909.0 | 1916.0 | 1905.8 | 1917.4 | 1911.4 | 1896.9 | 1903.3 | 1903.3 | 1895.6 | 1895.6 | 1895.6 |
| gdb 596  | 1898.7 <sup>a</sup> | 1904.5 | 1914.7 | 1902.6 | 1915.3 | 1908.0 | 1893.8 | 1900.7 | 1900.7 | 1892.7 | 1892.7 | 1892.7 |
| gdb 597  | 1893.9 <sup>a</sup> | 1903.5 | 1908.4 | 1899.7 | 1907.5 | 1903.2 | 1890.2 | 1894.3 | 1894.3 | 1889.5 | 1889.5 | 1889.5 |
| gdb 598  | 1896.9 <sup>a</sup> | 1904.9 | 1908.6 | 1897.8 | 1906.0 | 1900.2 | 1893.8 | 1897.9 | 1897.9 | 1890.9 | 1890.9 | 1890.9 |
| gdb 599  | 1868.1 <sup>a</sup> | 1882.3 | 1873.2 | 1870.3 | 1880.4 | 1872.4 | 1861.6 | 1860.3 | 1860.3 | 1856.7 | 1856.7 | 1856.7 |
| gdb 600  | 1893.7 <sup>a</sup> | 1906.8 | 1913.7 | 1901.6 | 1912.1 | 1905.7 | 1893.3 | 1897.5 | 1897.5 | 1890.5 | 1890.4 | 1890.4 |
| gdb 601  | 1888.5 <sup>a</sup> | 1900.8 | 1906.0 | 1896.1 | 1905.3 | 1899.7 | 1887.1 | 1891.1 | 1891.1 | 1886.2 | 1886.2 | 1886.2 |
| gdb 602  | 1892.5 <sup>a</sup> | 1905.9 | 1913.0 | 1901.2 | 1910.5 | 1903.8 | 1892.0 | 1896.6 | 1896.6 | 1889.2 | 1889.2 | 1889.2 |
| gdb 603  | 1879.1 <sup>a</sup> | 1896.5 | 1891.8 | 1888.3 | 1897.7 | 1889.9 | 1875.0 | 1877.1 | 1877.1 | 1874.4 | 1874.4 | 1874.4 |
| gdb 604  | 1885.6 <sup>a</sup> | 1902.9 | 1894.9 | 1894.9 | 1907.5 | 1897.7 | 1884.1 | 1886.6 | 1886.6 | 1881.1 | 1881.1 | 1881.1 |
| gdb 605  | 1876.1 <sup>a</sup> | 1895.0 | 1891.5 | 1887.9 | 1895.1 | 1886.5 | 1873.6 | 1874.8 | 1874.8 | 1871.8 | 1871.8 | 1871.8 |
| gdb 606  | 1888.5 <sup>a</sup> | 1903.4 | 1903.2 | 1895.5 | 1909.6 | 1898.6 | 1887.8 | 1891.6 | 1891.6 | 1885.0 | 1885.0 | 1885.0 |
| gdb 607  | 1880.4 <sup>a</sup> | 1896.5 | 1894.1 | 1889.2 | 1900.9 | 1891.5 | 1878.5 | 1880.7 | 1880.7 | 1877.5 | 1877.5 | 1877.5 |
| gdb 608  | 1897.7 <sup>a</sup> | 1913.6 | 1914.4 | 1906.7 | 1910.5 | 1904.0 | 1898.3 | 1901.0 | 1901.0 | 1893.2 | 1893.2 | 1893.2 |
| gdb 609  | 1886.4 <sup>a</sup> | 1896.3 | 1898.0 | 1890.2 | 1898.4 | 1893.7 | 1886.3 | 1888.7 | 1888.7 | 1884.3 | 1884.3 | 1884.3 |
| gdb 610  | 1892.1 <sup>a</sup> | 1902.1 | 1904.6 | 1894.4 | 1902.4 | 1896.6 | 1890.2 | 1893.7 | 1893.7 | 1887.2 | 1887.1 | 1887.1 |
| gdb 611  | 1891.8 <sup>a</sup> | 1909.4 | 1909.7 | 1900.3 | 1906.8 | 1901.6 | 1893.9 | 1896.1 | 1896.1 | 1890.9 | 1890.9 | 1890.9 |
| gdb 612  | 1891.7 <sup>a</sup> | 1898.3 | 1907.8 | 1895.6 | 1907.8 | 1901.2 | 1889.6 | 1896.0 | 1896.0 | 1887.6 | 1887.6 | 1887.6 |
| gdb 613  | 1885.1 <sup>a</sup> | 1894.3 | 1901.4 | 1892.0 | 1902.9 | 1897.5 | 1884.7 | 1890.1 | 1890.1 | 1884.6 | 1884.6 | 1884.6 |
| gdb 614  | 1884.3 <sup>a</sup> | 1895.3 | 1903.2 | 1892.9 | 1901.2 | 1896.4 | 1884.7 | 1889.4 | 1889.4 | 1883.7 | 1883.7 | 1883.7 |
| gdb 615  | 1890.6 <sup>a</sup> | 1900.3 | 1909.1 | 1897.0 | 1908.4 | 1902.0 | 1890.4 | 1895.9 | 1895.9 | 1888.1 | 1888.1 | 1888.1 |
| gdb 616  | 1885.4 <sup>a</sup> | 1898.6 | 1894.9 | 1888.8 | 1900.1 | 1891.3 | 1885.9 | 1888.5 | 1888.5 | 1882.3 | 1882.3 | 1882.3 |
| gdb 617  | 1879.6 <sup>a</sup> | 1894.0 | 1889.8 | 1885.6 | 1897.6 | 1888.3 | 1880.2 | 1883.5 | 1883.5 | 1880.0 | 1880.0 | 1880.0 |
| gdb 618  | 1878.9 <sup>a</sup> | 1893.9 | 1889.6 | 1885.1 | 1895.0 | 1885.5 | 1878.0 | 1880.2 | 1880.2 | 1876.6 | 1876.6 | 1876.6 |
| gdb 619  | 1875.6 <sup>a</sup> | 1893.1 | 1885.9 | 1882.9 | 1890.2 | 1882.5 | 1875.9 | 1876.9 | 1876.8 | 1874.0 | 1874.0 | 1874.0 |
| gdb 620  | 1881.4 <sup>a</sup> | 1894.5 | 1888.7 | 1884.6 | 1896.9 | 1887.7 | 1882.6 | 1884.6 | 1884.6 | 1881.1 | 1881.1 | 1881.1 |
| gdb 621  | 1882.4 <sup>a</sup> | 1894.9 | 1891.2 | 1886.1 | 1897.2 | 1887.9 | 1881.6 | 1885.2 | 1885.2 | 1880.9 | 1880.9 | 1880.8 |
| gdb 622  | 1887.8 <sup>a</sup> | 1900.2 | 1897.4 | 1892.3 | 1904.0 | 1892.7 | 1886.9 | 1891.9 | 1891.9 | 1885.2 | 1885.2 | 1885.2 |
| gdb 623  | 1893.1 <sup>a</sup> | 1912.8 | 1910.5 | 1903.9 | 1909.5 | 1903.1 | 1895.5 | 1899.3 | 1899.3 | 1892.3 | 1892.3 | 1892.3 |
| gdb 624  | 1886.9 <sup>a</sup> | 1910.2 | 1907.6 | 1899.9 | 1907.0 | 1901.3 | 1892.3 | 1896.2 | 1896.2 | 1891.1 | 1891.1 | 1891.1 |
| gdb 625  | 1889.7 <sup>a</sup> | 1910.4 | 1908.1 | 1900.3 | 1906.0 | 1900.7 | 1892.6 | 1895.0 | 1895.0 | 1890.3 | 1890.3 | 1890.3 |
| gdb 626  | 1889.1 <sup>a</sup> | 1910.0 | 1910.5 | 1901.7 | 1908.1 | 1901.6 | 1891.1 | 1895.6 | 1895.6 | 1890.7 | 1890.7 | 1890.7 |
| gdb 627  | 1895.6 <sup>a</sup> | 1911.7 | 1912.4 | 1903.6 | 1909.1 | 1903.0 | 1894.0 | 1899.0 | 1899.0 | 1891.3 | 1891.3 | 1891.3 |
| gdb 628  | 1891.9 <sup>a</sup> | 1906.4 | 1905.4 | 1899.4 | 1906.4 | 1900.2 | 1891.0 | 1896.3 | 1896.3 | 1891.3 | 1891.3 | 1891.3 |
| gdb 629  | 1893.0 <sup>a</sup> | 1907.0 | 1906.3 | 1899.8 | 1907.3 | 1901.1 | 1891.6 | 1897.0 | 1897.0 | 1891.8 | 1891.7 | 1891.7 |

... continued on next page ...

Table S26: ... continued from previous page. ...

| Molecule | Ref.                | MNDO   | AMI    | PM3    | PM6    | PM7    | OM1    | OM2    |        | OM3    |        | D3T    |
|----------|---------------------|--------|--------|--------|--------|--------|--------|--------|--------|--------|--------|--------|
|          |                     |        |        |        |        |        |        | D2     | D3     | D2     | D3     |        |
| gdb 630  | 1897.1 <sup>a</sup> | 1909.6 | 1907.3 | 1902.4 | 1906.1 | 1899.9 | 1893.7 | 1898.7 | 1898.7 | 1891.7 | 1891.7 | 1891.7 |
| gdb 631  | 1896.9 <sup>a</sup> | 1912.0 | 1909.7 | 1906.1 | 1913.0 | 1907.9 | 1900.7 | 1909.0 | 1909.0 | 1900.9 | 1900.9 | 1900.9 |
| gdb 632  | 1894.9 <sup>a</sup> | 1909.7 | 1910.5 | 1905.4 | 1910.4 | 1904.0 | 1896.5 | 1905.4 | 1905.4 | 1896.8 | 1896.8 | 1896.8 |
| gdb 633  | 1891.1 <sup>a</sup> | 1903.6 | 1901.2 | 1898.3 | 1905.8 | 1899.9 | 1892.7 | 1900.2 | 1900.2 | 1894.6 | 1894.6 | 1894.6 |
| gdb 634  | 1895.2 <sup>a</sup> | 1910.8 | 1909.1 | 1904.2 | 1908.4 | 1902.2 | 1895.8 | 1904.1 | 1904.1 | 1895.3 | 1895.3 | 1895.3 |
| gdb 635  | 1899.4 <sup>a</sup> | 1909.9 | 1904.5 | 1903.4 | 1909.8 | 1904.0 | 1900.0 | 1907.4 | 1907.4 | 1899.6 | 1899.6 | 1899.5 |
| gdb 636  | 1897.0 <sup>a</sup> | 1912.1 | 1907.1 | 1904.1 | 1910.0 | 1904.8 | 1898.9 | 1906.8 | 1906.8 | 1898.5 | 1898.5 | 1898.5 |
| gdb 637  | 1873.3 <sup>a</sup> | 1887.1 | 1894.0 | 1880.2 | 1890.0 | 1883.8 | 1872.8 | 1873.2 | 1873.2 | 1865.6 | 1865.6 | 1865.6 |
| gdb 638  | 1860.4 <sup>a</sup> | 1871.4 | 1877.3 | 1863.9 | 1867.0 | 1861.4 | 1858.1 | 1857.7 | 1857.7 | 1852.0 | 1852.0 | 1852.0 |
| gdb 639  | 1848.7 <sup>a</sup> | 1861.4 | 1866.5 | 1855.9 | 1864.9 | 1852.1 | 1847.7 | 1848.1 | 1848.1 | 1843.9 | 1843.9 | 1843.9 |
| gdb 640  | 1846.7 <sup>a</sup> | 1862.1 | 1871.1 | 1859.5 | 1864.4 | 1857.1 | 1849.6 | 1851.8 | 1851.7 | 1847.1 | 1847.1 | 1847.1 |
| gdb 641  | 1856.2 <sup>a</sup> | 1870.3 | 1877.6 | 1865.0 | 1867.2 | 1859.8 | 1856.7 | 1858.3 | 1858.3 | 1851.2 | 1851.2 | 1851.2 |
| gdb 642  | 1871.5 <sup>a</sup> | 1884.4 | 1865.4 | 1873.2 | 1879.3 | 1875.4 | 1876.3 | 1876.8 | 1876.8 | 1874.5 | 1874.5 | 1874.5 |
| gdb 643  | 1871.8 <sup>a</sup> | 1884.5 | 1868.5 | 1874.4 | 1883.2 | 1877.6 | 1874.4 | 1874.2 | 1874.2 | 1872.3 | 1872.3 | 1872.3 |
| gdb 644  | 1871.4 <sup>a</sup> | 1885.4 | 1868.1 | 1875.4 | 1878.1 | 1877.8 | 1877.0 | 1876.5 | 1876.5 | 1871.8 | 1871.7 | 1871.7 |
| gdb 645  | 1867.8 <sup>a</sup> | 1869.9 | 1856.8 | 1862.3 | 1869.6 | 1869.3 | 1872.4 | 1872.5 | 1872.5 | 1868.3 | 1868.0 | 1868.1 |
| gdb 646  | 1873.1 <sup>a</sup> | 1870.5 | 1860.0 | 1863.5 | 1873.9 | 1872.4 | 1875.7 | 1876.5 | 1876.5 | 1872.6 | 1872.6 | 1872.6 |
| gdb 647  | 1885.2 <sup>a</sup> | 1881.3 | 1869.1 | 1872.1 | 1887.9 | 1883.5 | 1886.2 | 1883.4 | 1883.4 | 1881.9 | 1881.9 | 1881.9 |
| gdb 648  | 1892.2 <sup>a</sup> | 1902.9 | 1898.7 | 1900.5 | 1906.2 | 1899.3 | 1893.0 | 1894.8 | 1894.8 | 1894.3 | 1894.2 | 1894.2 |
| gdb 649  | 1888.9 <sup>a</sup> | 1901.5 | 1897.3 | 1899.9 | 1904.7 | 1898.0 | 1890.7 | 1894.6 | 1894.6 | 1893.6 | 1893.6 | 1893.6 |
| gdb 650  | 1897.5 <sup>a</sup> | 1903.9 | 1895.5 | 1898.3 | 1903.2 | 1897.6 | 1893.3 | 1895.3 | 1895.3 | 1894.8 | 1894.8 | 1894.8 |
| gdb 651  | 1910.0 <sup>a</sup> | 1914.9 | 1919.7 | 1916.2 | 1918.6 | 1915.7 | 1911.2 | 1916.8 | 1916.8 | 1914.7 | 1914.7 | 1914.7 |
| gdb 652  | 1907.1 <sup>a</sup> | 1913.9 | 1917.7 | 1915.4 | 1918.0 | 1915.1 | 1909.0 | 1914.5 | 1914.5 | 1912.8 | 1912.8 | 1912.8 |
| gdb 653  | 1910.5 <sup>a</sup> | 1915.3 | 1917.8 | 1915.1 | 1918.0 | 1915.3 | 1911.8 | 1917.7 | 1917.7 | 1916.1 | 1916.1 | 1916.1 |
| gdb 654  | 1876.8 <sup>a</sup> | 1899.7 | 1879.2 | 1890.3 | 1897.2 | 1888.3 | 1877.5 | 1876.7 | 1876.7 | 1876.6 | 1876.6 | 1876.6 |
| gdb 655  | 1873.4 <sup>a</sup> | 1899.9 | 1880.1 | 1890.0 | 1895.5 | 1886.4 | 1875.2 | 1874.1 | 1874.1 | 1874.2 | 1874.2 | 1874.2 |
| gdb 656  | 1897.6 <sup>a</sup> | 1907.0 | 1884.9 | 1897.6 | 1905.3 | 1896.4 | 1887.7 | 1884.5 | 1884.5 | 1883.6 | 1883.6 | 1883.6 |
| gdb 657  | 1870.8 <sup>a</sup> | 1885.4 | 1868.0 | 1877.3 | 1887.9 | 1881.0 | 1876.9 | 1875.7 | 1875.7 | 1876.2 | 1876.2 | 1876.2 |
| gdb 658  | 1895.8 <sup>a</sup> | 1891.3 | 1874.1 | 1884.1 | 1896.3 | 1887.6 | 1883.4 | 1880.5 | 1880.4 | 1880.4 | 1880.4 | 1880.4 |
| gdb 659  | 1874.9 <sup>a</sup> | 1885.2 | 1870.9 | 1878.4 | 1884.6 | 1879.9 | 1876.2 | 1875.5 | 1875.5 | 1873.6 | 1873.6 | 1873.6 |
| gdb 660  | 1897.1 <sup>a</sup> | 1915.6 | 1903.6 | 1910.9 | 1917.0 | 1909.1 | 1902.0 | 1907.3 | 1907.3 | 1906.8 | 1906.8 | 1906.8 |
| gdb 661  | 1893.1 <sup>a</sup> | 1913.0 | 1904.4 | 1910.2 | 1913.6 | 1904.9 | 1896.4 | 1902.0 | 1902.0 | 1901.5 | 1901.5 | 1901.5 |
| gdb 662  | 1919.7 <sup>a</sup> | 1918.9 | 1905.3 | 1914.8 | 1921.6 | 1913.4 | 1907.7 | 1909.2 | 1909.2 | 1908.7 | 1908.7 | 1908.7 |
| gdb 663  | 1913.5 <sup>a</sup> | 1915.0 | 1921.6 | 1919.0 | 1924.7 | 1920.8 | 1913.5 | 1921.1 | 1921.1 | 1919.7 | 1919.7 | 1919.7 |
| gdb 664  | 1913.2 <sup>a</sup> | 1915.0 | 1921.7 | 1918.6 | 1921.6 | 1918.5 | 1913.1 | 1919.8 | 1919.8 | 1918.2 | 1918.2 | 1918.2 |
| gdb 665  | 1910.0 <sup>a</sup> | 1914.0 | 1919.2 | 1917.2 | 1919.9 | 1916.8 | 1910.2 | 1917.5 | 1917.5 | 1915.8 | 1915.8 | 1915.8 |
| gdb 666  | 1916.7 <sup>a</sup> | 1918.7 | 1921.0 | 1919.5 | 1925.3 | 1922.5 | 1917.0 | 1924.7 | 1924.7 | 1922.9 | 1922.9 | 1922.9 |
| gdb 667  | 1933.5 <sup>a</sup> | 1924.4 | 1928.2 | 1927.3 | 1931.7 | 1927.3 | 1925.5 | 1930.7 | 1930.7 | 1928.1 | 1928.1 | 1928.1 |
| gdb 668  | 1918.0 <sup>a</sup> | 1919.3 | 1923.5 | 1921.7 | 1930.6 | 1926.7 | 1919.1 | 1927.4 | 1927.4 | 1925.4 | 1925.3 | 1925.3 |
| gdb 669  | 1929.0 <sup>a</sup> | 1924.5 | 1931.1 | 1931.0 | 1934.4 | 1929.1 | 1924.6 | 1929.9 | 1929.9 | 1927.3 | 1927.3 | 1927.3 |
| gdb 670  | 1915.7 <sup>a</sup> | 1916.0 | 1922.5 | 1919.6 | 1926.9 | 1922.6 | 1915.8 | 1923.4 | 1923.4 | 1922.1 | 1922.1 | 1922.1 |
| gdb 671  | 1913.4 <sup>a</sup> | 1916.7 | 1925.0 | 1920.3 | 1926.4 | 1923.4 | 1915.3 | 1922.0 | 1922.0 | 1920.5 | 1920.5 | 1920.5 |
| gdb 672  | 1912.1 <sup>a</sup> | 1916.0 | 1923.8 | 1919.3 | 1922.8 | 1920.4 | 1913.6 | 1920.1 | 1920.1 | 1918.3 | 1918.3 | 1918.3 |
| gdb 673  | 1931.9 <sup>a</sup> | 1925.7 | 1933.2 | 1930.4 | 1934.2 | 1930.2 | 1926.6 | 1930.6 | 1930.6 | 1928.0 | 1928.0 | 1928.0 |
| gdb 674  | 1932.8 <sup>a</sup> | 1938.2 | 1936.7 | 1936.6 | 1938.1 | 1933.0 | 1933.7 | 1935.3 | 1935.3 | 1933.9 | 1933.9 | 1933.9 |

... continued on next page ...

Table S26: ... continued from previous page. ...

| Molecule | Ref.                | MNDO   | AMI    | PM3    | PM6    | PM7    | OM1    |        | OM2    |        | OM3    |        | D3T    |
|----------|---------------------|--------|--------|--------|--------|--------|--------|--------|--------|--------|--------|--------|--------|
|          |                     |        |        |        |        |        | OM1    | OM2    | D2     | D3     | D3T    | D2     |        |
| gdb 675  | 1914.3 <sup>a</sup> | 1929.4 | 1929.4 | 1927.0 | 1931.0 | 1926.3 | 1923.5 | 1927.0 | 1927.0 | 1927.0 | 1926.9 | 1926.9 | 1926.9 |
| gdb 676  | 1911.3 <sup>a</sup> | 1928.5 | 1929.5 | 1926.1 | 1927.9 | 1923.0 | 1920.1 | 1924.1 | 1924.1 | 1924.1 | 1923.9 | 1923.9 | 1923.9 |
| gdb 677  | 1892.2 <sup>a</sup> | 1913.7 | 1902.4 | 1905.8 | 1907.9 | 1901.7 | 1896.9 | 1897.5 | 1897.5 | 1897.5 | 1897.0 | 1896.9 | 1896.9 |
| gdb 678  | 1893.5 <sup>a</sup> | 1913.2 | 1905.3 | 1907.0 | 1911.8 | 1903.9 | 1895.4 | 1896.6 | 1896.6 | 1896.6 | 1896.4 | 1896.4 | 1896.4 |
| gdb 679  | 1894.2 <sup>a</sup> | 1913.5 | 1905.5 | 1906.9 | 1911.2 | 1903.7 | 1895.9 | 1897.0 | 1897.0 | 1897.0 | 1897.1 | 1897.1 | 1897.1 |
| gdb 680  | 1897.4 <sup>a</sup> | 1914.5 | 1904.7 | 1907.4 | 1912.8 | 1905.7 | 1899.5 | 1900.6 | 1900.6 | 1900.6 | 1900.4 | 1900.4 | 1900.4 |
| gdb 681  | 1918.3 <sup>a</sup> | 1919.6 | 1908.0 | 1911.9 | 1918.9 | 1910.9 | 1906.6 | 1904.2 | 1904.2 | 1904.2 | 1904.2 | 1904.2 | 1904.2 |
| gdb 682  | 1908.0 <sup>a</sup> | 1908.9 | 1903.9 | 1906.4 | 1913.4 | 1907.0 | 1907.0 | 1907.6 | 1907.6 | 1907.6 | 1906.2 | 1906.2 | 1906.2 |
| gdb 683  | 1894.0 <sup>a</sup> | 1898.3 | 1893.8 | 1894.7 | 1898.5 | 1897.4 | 1897.6 | 1898.8 | 1898.8 | 1898.8 | 1896.4 | 1896.4 | 1896.4 |
| gdb 684  | 1909.9 <sup>a</sup> | 1909.4 | 1902.4 | 1906.2 | 1914.4 | 1908.6 | 1909.6 | 1910.2 | 1910.2 | 1910.2 | 1908.4 | 1908.4 | 1908.4 |
| gdb 685  | 1889.8 <sup>a</sup> | 1899.5 | 1893.3 | 1895.3 | 1903.7 | 1899.3 | 1897.3 | 1900.4 | 1900.3 | 1900.3 | 1899.8 | 1899.7 | 1899.7 |
| gdb 686  | 1895.5 <sup>a</sup> | 1916.8 | 1901.7 | 1908.8 | 1911.2 | 1905.6 | 1902.3 | 1906.3 | 1906.3 | 1906.3 | 1904.6 | 1904.6 | 1904.6 |
| gdb 687  | 1893.3 <sup>a</sup> | 1914.5 | 1903.6 | 1908.9 | 1910.9 | 1903.9 | 1897.9 | 1902.4 | 1902.4 | 1902.4 | 1901.1 | 1901.1 | 1901.1 |
| gdb 688  | 1896.3 <sup>a</sup> | 1911.8 | 1897.5 | 1904.6 | 1905.8 | 1900.1 | 1896.1 | 1899.5 | 1899.5 | 1899.5 | 1898.8 | 1898.8 | 1898.8 |
| gdb 689  | 1915.1 <sup>a</sup> | 1919.7 | 1905.8 | 1912.8 | 1915.4 | 1907.5 | 1904.7 | 1905.3 | 1905.3 | 1905.3 | 1904.0 | 1904.0 | 1904.0 |
| gdb 690  | 1874.2 <sup>a</sup> | 1899.6 | 1877.7 | 1888.7 | 1894.8 | 1886.5 | 1876.5 | 1875.1 | 1875.1 | 1875.1 | 1874.6 | 1874.6 | 1874.6 |
| gdb 691  | 1873.4 <sup>a</sup> | 1900.6 | 1879.5 | 1889.2 | 1890.6 | 1885.6 | 1876.0 | 1874.2 | 1874.2 | 1874.2 | 1873.8 | 1873.8 | 1873.8 |
| gdb 692  | 1873.0 <sup>a</sup> | 1899.2 | 1877.0 | 1887.7 | 1890.6 | 1883.4 | 1875.3 | 1874.4 | 1874.4 | 1874.4 | 1873.5 | 1873.5 | 1873.5 |
| gdb 693  | 1894.5 <sup>a</sup> | 1907.6 | 1885.5 | 1896.8 | 1902.8 | 1893.8 | 1886.3 | 1882.5 | 1882.5 | 1882.5 | 1881.3 | 1881.3 | 1881.3 |
| gdb 694  | 1874.9 <sup>a</sup> | 1885.9 | 1870.5 | 1877.8 | 1883.0 | 1879.3 | 1877.0 | 1875.8 | 1875.7 | 1875.7 | 1873.5 | 1873.4 | 1873.4 |
| gdb 695  | 1868.6 <sup>a</sup> | 1885.7 | 1866.4 | 1875.3 | 1883.3 | 1877.8 | 1876.1 | 1874.6 | 1874.5 | 1874.6 | 1874.1 | 1874.1 | 1874.1 |
| gdb 696  | 1871.0 <sup>a</sup> | 1883.5 | 1865.9 | 1874.1 | 1881.8 | 1874.1 | 1870.6 | 1869.7 | 1869.7 | 1869.7 | 1869.9 | 1869.8 | 1869.8 |
| gdb 697  | 1892.7 <sup>a</sup> | 1892.0 | 1874.5 | 1883.3 | 1893.2 | 1884.6 | 1881.9 | 1878.3 | 1878.2 | 1878.2 | 1877.8 | 1877.8 | 1877.8 |
| gdb 698  | 1906.9 <sup>a</sup> | 1907.1 | 1903.6 | 1907.2 | 1913.2 | 1906.0 | 1901.3 | 1904.3 | 1904.3 | 1904.3 | 1901.8 | 1901.7 | 1901.7 |
| gdb 699  | 1892.0 <sup>a</sup> | 1897.5 | 1891.4 | 1894.6 | 1902.3 | 1899.1 | 1891.7 | 1896.2 | 1896.2 | 1896.2 | 1896.1 | 1896.1 | 1896.1 |
| gdb 700  | 1900.3 <sup>a</sup> | 1898.6 | 1894.6 | 1896.5 | 1901.8 | 1900.7 | 1896.9 | 1901.1 | 1901.1 | 1901.1 | 1898.1 | 1898.1 | 1898.1 |
| gdb 701  | 1910.9 <sup>a</sup> | 1923.6 | 1914.8 | 1922.4 | 1924.6 | 1916.9 | 1910.8 | 1914.5 | 1914.5 | 1914.5 | 1912.1 | 1912.1 | 1912.1 |
| gdb 702  | 1915.7 <sup>a</sup> | 1925.7 | 1913.5 | 1922.8 | 1926.9 | 1920.6 | 1915.8 | 1919.5 | 1919.5 | 1919.5 | 1917.0 | 1917.0 | 1917.0 |
| gdb 703  | 1899.4 <sup>a</sup> | 1913.0 | 1902.5 | 1910.0 | 1916.9 | 1910.2 | 1900.9 | 1905.4 | 1905.4 | 1905.4 | 1904.9 | 1904.9 | 1904.9 |
| gdb 704  | 1893.9 <sup>a</sup> | 1912.5 | 1903.3 | 1908.8 | 1911.7 | 1905.0 | 1896.3 | 1900.4 | 1900.4 | 1900.4 | 1899.9 | 1899.9 | 1899.9 |
| gdb 705  | 1896.0 <sup>a</sup> | 1915.7 | 1904.4 | 1911.7 | 1916.1 | 1911.1 | 1903.3 | 1909.6 | 1909.6 | 1909.6 | 1908.3 | 1908.3 | 1908.3 |
| gdb 706  | 1901.1 <sup>a</sup> | 1909.9 | 1906.4 | 1910.1 | 1914.8 | 1908.0 | 1901.1 | 1904.1 | 1904.1 | 1904.1 | 1900.4 | 1900.4 | 1900.4 |
| gdb 707  | 1899.6 <sup>a</sup> | 1904.0 | 1898.9 | 1901.8 | 1912.5 | 1906.7 | 1897.4 | 1901.4 | 1901.4 | 1901.4 | 1899.8 | 1899.8 | 1899.8 |
| gdb 708  | 1904.1 <sup>a</sup> | 1910.2 | 1907.2 | 1912.8 | 1917.8 | 1910.0 | 1902.1 | 1906.0 | 1906.0 | 1906.0 | 1903.1 | 1903.1 | 1903.1 |
| gdb 709  | 1887.8 <sup>a</sup> | 1900.5 | 1899.0 | 1901.8 | 1908.3 | 1902.5 | 1891.3 | 1897.4 | 1897.4 | 1897.4 | 1895.5 | 1895.5 | 1895.5 |
| gdb 710  | 1901.4 <sup>a</sup> | 1904.1 | 1901.1 | 1902.5 | 1909.3 | 1901.5 | 1899.1 | 1899.4 | 1899.4 | 1899.4 | 1897.1 | 1897.1 | 1897.1 |
| gdb 711  | 1887.5 <sup>a</sup> | 1896.0 | 1891.6 | 1891.5 | 1898.4 | 1894.8 | 1891.2 | 1891.4 | 1891.4 | 1891.4 | 1891.7 | 1891.7 | 1891.7 |
| gdb 712  | 1895.2 <sup>a</sup> | 1896.8 | 1893.9 | 1893.4 | 1900.4 | 1899.4 | 1896.8 | 1897.2 | 1897.2 | 1897.2 | 1894.8 | 1894.7 | 1894.7 |
| gdb 713  | 1915.4 <sup>a</sup> | 1915.9 | 1921.4 | 1918.2 | 1923.6 | 1920.2 | 1915.0 | 1922.3 | 1922.3 | 1922.3 | 1920.4 | 1920.4 | 1920.4 |
| gdb 714  | 1915.0 <sup>a</sup> | 1918.8 | 1921.0 | 1919.3 | 1924.2 | 1922.1 | 1916.6 | 1923.6 | 1923.6 | 1923.6 | 1921.2 | 1921.2 | 1921.2 |
| gdb 715  | 1913.8 <sup>a</sup> | 1914.5 | 1920.3 | 1917.5 | 1921.0 | 1918.3 | 1913.6 | 1920.9 | 1920.9 | 1920.9 | 1918.7 | 1918.7 | 1918.7 |
| gdb 716  | 1910.6 <sup>a</sup> | 1914.5 | 1920.7 | 1918.0 | 1921.5 | 1919.0 | 1912.5 | 1919.5 | 1919.5 | 1919.5 | 1917.7 | 1917.7 | 1917.7 |
| gdb 717  | 1926.3 <sup>a</sup> | 1923.9 | 1929.5 | 1928.7 | 1929.0 | 1924.2 | 1921.9 | 1926.2 | 1926.2 | 1926.2 | 1923.0 | 1922.9 | 1922.9 |
| gdb 718  | 1899.5 <sup>a</sup> | 1905.1 | 1899.4 | 1903.2 | 1908.8 | 1900.3 | 1894.1 | 1897.0 | 1897.0 | 1897.0 | 1894.2 | 1894.2 | 1894.2 |
| gdb 719  | 1910.1 <sup>a</sup> | 1924.2 | 1915.9 | 1921.5 | 1924.5 | 1917.6 | 1910.5 | 1912.0 | 1912.0 | 1912.0 | 1909.1 | 1909.1 | 1909.1 |

... continued on next page ...

Table S26: ... continued from previous page ...

| Molecule | Ref.                | MNDO   | AMI    | PM3    | PM6    | PM7    | OM1    | OM2    |        | OM3    |        | D3T    | OM3    | D3     | D3T    |
|----------|---------------------|--------|--------|--------|--------|--------|--------|--------|--------|--------|--------|--------|--------|--------|--------|
|          |                     |        |        |        |        |        |        | D2     | D3     | D2     | D3     |        |        |        |        |
| gdb 720  | 1899.2 <sup>a</sup> | 1912.3 | 1903.8 | 1906.1 | 1913.4 | 1906.8 | 1898.1 | 1899.6 | 1899.6 | 1899.6 | 1899.3 | 1899.6 | 1899.3 | 1899.3 | 1899.3 |
| gdb 721  | 1897.0 <sup>a</sup> | 1911.9 | 1904.2 | 1906.3 | 1913.0 | 1907.0 | 1898.3 | 1899.9 | 1899.9 | 1899.9 | 1899.9 | 1899.9 | 1899.2 | 1899.2 | 1899.2 |
| gdb 722  | 1894.2 <sup>a</sup> | 1914.1 | 1906.4 | 1908.3 | 1912.5 | 1908.6 | 1901.2 | 1903.8 | 1903.8 | 1903.8 | 1903.8 | 1903.8 | 1902.1 | 1902.1 | 1902.1 |
| gdb 723  | 1909.4 <sup>a</sup> | 1929.1 | 1925.6 | 1924.0 | 1923.3 | 1920.3 | 1919.5 | 1922.2 | 1922.2 | 1922.2 | 1922.2 | 1922.2 | 1921.4 | 1921.3 | 1921.4 |
| gdb 724  | 1912.6 <sup>a</sup> | 1929.2 | 1928.7 | 1925.3 | 1926.1 | 1922.0 | 1920.3 | 1924.0 | 1924.0 | 1924.0 | 1923.2 | 1924.0 | 1923.1 | 1923.1 | 1923.2 |
| gdb 725  | 1915.2 <sup>a</sup> | 1930.1 | 1928.7 | 1926.0 | 1929.2 | 1925.3 | 1923.6 | 1927.2 | 1927.2 | 1927.2 | 1926.4 | 1927.1 | 1926.4 | 1926.4 | 1926.4 |
| gdb 726  | 1913.3 <sup>a</sup> | 1929.0 | 1927.0 | 1924.8 | 1925.8 | 1922.8 | 1921.7 | 1925.4 | 1925.4 | 1925.4 | 1924.7 | 1925.4 | 1924.7 | 1924.7 | 1924.7 |
| gdb 727  | 1930.2 <sup>a</sup> | 1937.8 | 1936.4 | 1935.3 | 1934.4 | 1929.3 | 1930.9 | 1932.4 | 1932.4 | 1932.4 | 1930.5 | 1932.4 | 1930.4 | 1930.4 | 1930.4 |
| gdb 728  | 1919.2 <sup>a</sup> | 1920.6 | 1926.8 | 1926.0 | 1929.0 | 1929.3 | 1925.5 | 1929.8 | 1929.8 | 1929.8 | 1932.6 | 1929.8 | 1932.6 | 1932.6 | 1932.6 |
| gdb 729  | 1896.4 <sup>a</sup> | 1913.3 | 1898.5 | 1906.3 | 1908.5 | 1904.1 | 1898.2 | 1901.0 | 1901.0 | 1901.0 | 1899.6 | 1901.0 | 1899.6 | 1899.6 | 1899.6 |
| gdb 730  | 1893.7 <sup>a</sup> | 1912.9 | 1901.1 | 1906.3 | 1907.5 | 1902.3 | 1895.9 | 1898.6 | 1898.6 | 1898.6 | 1897.2 | 1898.6 | 1897.1 | 1897.1 | 1897.1 |
| gdb 731  | 1896.4 <sup>a</sup> | 1916.8 | 1903.2 | 1909.8 | 1913.0 | 1909.2 | 1903.9 | 1908.6 | 1908.6 | 1908.6 | 1906.5 | 1908.6 | 1906.5 | 1906.5 | 1906.5 |
| gdb 732  | 1891.7 <sup>a</sup> | 1914.9 | 1904.4 | 1909.4 | 1909.9 | 1905.5 | 1899.2 | 1903.9 | 1903.9 | 1903.9 | 1902.0 | 1903.9 | 1902.0 | 1902.0 | 1902.0 |
| gdb 733  | 1911.3 <sup>a</sup> | 1924.5 | 1913.5 | 1920.6 | 1922.0 | 1915.4 | 1911.4 | 1914.1 | 1914.1 | 1914.1 | 1910.9 | 1914.1 | 1910.9 | 1910.9 | 1910.9 |
| gdb 734  | 1892.4 <sup>a</sup> | 1899.1 | 1892.6 | 1893.6 | 1896.8 | 1896.4 | 1897.9 | 1898.6 | 1898.5 | 1898.5 | 1895.5 | 1898.5 | 1895.5 | 1895.5 | 1895.5 |
| gdb 735  | 1889.0 <sup>a</sup> | 1900.1 | 1892.5 | 1894.3 | 1902.5 | 1898.5 | 1897.5 | 1900.3 | 1900.3 | 1900.3 | 1899.0 | 1900.3 | 1899.0 | 1899.0 | 1899.0 |
| gdb 736  | 1887.4 <sup>a</sup> | 1899.7 | 1893.6 | 1894.1 | 1900.1 | 1896.0 | 1894.8 | 1897.1 | 1897.3 | 1897.3 | 1896.7 | 1897.3 | 1896.6 | 1896.6 | 1896.6 |
| gdb 737  | 1906.9 <sup>a</sup> | 1909.3 | 1902.7 | 1905.3 | 1911.7 | 1905.8 | 1907.1 | 1907.2 | 1907.2 | 1907.2 | 1905.2 | 1907.2 | 1905.3 | 1905.3 | 1905.3 |
| gdb 738  | 1907.0 <sup>a</sup> | 1906.8 | 1904.2 | 1907.6 | 1914.5 | 1906.9 | 1901.2 | 1904.5 | 1904.5 | 1904.5 | 1902.3 | 1904.5 | 1902.3 | 1902.3 | 1902.3 |
| gdb 739  | 1907.4 <sup>a</sup> | 1906.9 | 1900.1 | 1906.1 | 1912.5 | 1906.8 | 1902.5 | 1904.5 | 1904.5 | 1904.5 | 1903.5 | 1904.5 | 1903.4 | 1903.4 | 1903.4 |
| gdb 740  | 1899.8 <sup>a</sup> | 1898.1 | 1894.2 | 1896.2 | 1902.0 | 1900.6 | 1896.3 | 1900.4 | 1900.3 | 1900.3 | 1897.7 | 1900.3 | 1897.6 | 1897.6 | 1897.6 |
| gdb 741  | 1894.5 <sup>a</sup> | 1898.0 | 1893.0 | 1896.0 | 1906.4 | 1901.9 | 1893.5 | 1898.4 | 1898.4 | 1898.4 | 1898.3 | 1898.4 | 1898.3 | 1898.3 | 1898.3 |
| gdb 742  | 1890.7 <sup>a</sup> | 1897.3 | 1895.3 | 1896.3 | 1903.2 | 1898.4 | 1890.6 | 1896.1 | 1896.1 | 1896.1 | 1894.7 | 1896.1 | 1894.7 | 1894.7 | 1894.7 |
| gdb 743  | 1895.3 <sup>a</sup> | 1902.8 | 1895.9 | 1899.2 | 1906.0 | 1903.2 | 1894.1 | 1897.0 | 1897.0 | 1897.0 | 1895.3 | 1897.0 | 1895.3 | 1895.3 | 1895.3 |
| gdb 744  | 1891.0 <sup>a</sup> | 1901.2 | 1900.0 | 1902.6 | 1910.6 | 1904.3 | 1893.4 | 1899.2 | 1899.2 | 1899.2 | 1897.4 | 1899.2 | 1897.3 | 1897.3 | 1897.3 |
| gdb 745  | 1889.8 <sup>a</sup> | 1901.4 | 1900.2 | 1901.2 | 1906.1 | 1901.2 | 1893.2 | 1897.6 | 1897.6 | 1897.6 | 1895.3 | 1897.6 | 1895.3 | 1895.3 | 1895.3 |
| gdb 746  | 1903.0 <sup>a</sup> | 1909.8 | 1906.3 | 1910.9 | 1914.1 | 1906.6 | 1900.8 | 1903.0 | 1903.0 | 1903.0 | 1899.8 | 1903.0 | 1899.8 | 1899.8 | 1899.8 |
| gdb 747  | 1899.6 <sup>a</sup> | 1904.2 | 1901.3 | 1902.2 | 1909.4 | 1902.6 | 1899.3 | 1898.8 | 1898.7 | 1898.7 | 1896.7 | 1898.7 | 1896.7 | 1896.7 | 1896.7 |
| gdb 748  | 1899.3 <sup>a</sup> | 1903.7 | 1897.1 | 1899.1 | 1906.8 | 1900.7 | 1899.5 | 1897.6 | 1897.6 | 1897.6 | 1896.4 | 1897.6 | 1896.4 | 1896.4 | 1896.4 |
| gdb 749  | 1895.1 <sup>a</sup> | 1896.5 | 1891.5 | 1891.4 | 1897.8 | 1896.8 | 1895.5 | 1894.4 | 1894.4 | 1894.4 | 1892.7 | 1894.4 | 1892.6 | 1892.6 | 1892.6 |
| gdb 750  | 1890.4 <sup>a</sup> | 1897.0 | 1893.5 | 1893.1 | 1902.3 | 1897.8 | 1894.0 | 1894.1 | 1894.1 | 1894.1 | 1894.3 | 1894.1 | 1894.3 | 1894.3 | 1894.3 |
| gdb 751  | 1888.0 <sup>a</sup> | 1896.2 | 1894.7 | 1892.4 | 1901.7 | 1896.6 | 1892.3 | 1893.5 | 1893.4 | 1893.4 | 1892.8 | 1893.4 | 1892.8 | 1892.8 | 1892.8 |
| gdb 752  | 1894.5 <sup>a</sup> | 1912.5 | 1900.9 | 1904.2 | 1906.3 | 1901.6 | 1894.9 | 1895.8 | 1895.8 | 1895.8 | 1894.5 | 1895.8 | 1894.5 | 1894.5 | 1894.5 |
| gdb 753  | 1896.1 <sup>a</sup> | 1913.0 | 1903.3 | 1905.5 | 1911.9 | 1906.2 | 1898.1 | 1899.2 | 1899.2 | 1899.2 | 1898.2 | 1899.2 | 1898.2 | 1898.2 | 1898.2 |
| gdb 754  | 1895.4 <sup>a</sup> | 1915.5 | 1906.5 | 1908.5 | 1914.6 | 1909.7 | 1901.8 | 1904.3 | 1904.3 | 1904.3 | 1902.3 | 1904.3 | 1902.3 | 1902.3 | 1902.3 |
| gdb 755  | 1892.2 <sup>a</sup> | 1914.5 | 1906.7 | 1908.2 | 1910.9 | 1906.6 | 1898.2 | 1900.8 | 1900.8 | 1900.8 | 1898.9 | 1900.8 | 1898.9 | 1898.9 | 1898.9 |
| gdb 756  | 1908.2 <sup>a</sup> | 1923.8 | 1915.9 | 1920.0 | 1922.4 | 1915.1 | 1908.7 | 1909.6 | 1909.6 | 1909.6 | 1906.4 | 1909.6 | 1906.4 | 1906.4 | 1906.4 |
| gdb 757  | 1910.6 <sup>a</sup> | 1910.4 | 1914.7 | 1908.7 | 1915.4 | 1914.1 | 1908.7 | 1909.1 | 1909.1 | 1909.1 | 1906.4 | 1909.1 | 1906.4 | 1906.4 | 1906.4 |
| gdb 758  | 1889.2 <sup>a</sup> | 1900.1 | 1904.5 | 1898.2 | 1903.4 | 1902.1 | 1895.7 | 1896.4 | 1896.4 | 1896.4 | 1895.3 | 1896.4 | 1895.3 | 1895.3 | 1895.3 |
| gdb 759  | 1906.2 <sup>a</sup> | 1908.5 | 1912.3 | 1905.6 | 1912.9 | 1911.4 | 1905.4 | 1904.6 | 1904.6 | 1904.6 | 1902.2 | 1904.6 | 1902.2 | 1902.2 | 1902.2 |
| gdb 760  | 1920.3 <sup>a</sup> | 1921.4 | 1927.4 | 1926.8 | 1930.6 | 1930.1 | 1926.4 | 1930.8 | 1930.8 | 1930.8 | 1933.8 | 1930.8 | 1933.8 | 1933.8 | 1933.8 |
| gdb 761  | 1896.7 <sup>a</sup> | 1898.6 | 1891.9 | 1894.3 | 1896.1 | 1896.7 | 1895.6 | 1899.1 | 1899.1 | 1899.1 | 1895.3 | 1899.1 | 1895.3 | 1895.3 | 1895.3 |
| gdb 762  | 1893.7 <sup>a</sup> | 1897.9 | 1891.1 | 1893.8 | 1900.4 | 1898.2 | 1894.1 | 1898.1 | 1898.1 | 1898.1 | 1897.7 | 1898.1 | 1897.7 | 1897.7 | 1897.7 |
| gdb 763  | 1894.4 <sup>a</sup> | 1898.5 | 1896.0 | 1896.2 | 1904.3 | 1899.7 | 1894.2 | 1900.1 | 1900.1 | 1900.1 | 1897.9 | 1900.1 | 1897.9 | 1897.9 | 1897.9 |
| gdb 764  | 1893.2 <sup>a</sup> | 1897.7 | 1895.1 | 1895.3 | 1901.6 | 1897.9 | 1892.8 | 1898.7 | 1898.7 | 1898.7 | 1896.7 | 1898.7 | 1896.7 | 1896.7 | 1896.7 |

... continued on next page ...

Table S26: ... continued from previous page. ...

| Molecule | Ref.                | MNDO   | AMI    | PM3    | PM6    | PM7    | OM1    |        | OM2    |        | OM3    |        | D3T    |
|----------|---------------------|--------|--------|--------|--------|--------|--------|--------|--------|--------|--------|--------|--------|
|          |                     |        |        |        |        |        | D2     | D3     | D2     | D3     | D2     | D3     |        |
| gdb 765  | 1909.0 <sup>a</sup> | 1906.7 | 1903.4 | 1906.2 | 1911.4 | 1905.4 | 1903.0 | 1907.0 | 1907.0 | 1907.0 | 1903.6 | 1903.6 | 1903.6 |
| gdb 766  | 1896.4 <sup>a</sup> | 1895.7 | 1891.9 | 1891.1 | 1895.9 | 1895.8 | 1896.1 | 1896.4 | 1896.4 | 1896.4 | 1893.7 | 1893.6 | 1893.6 |
| gdb 767  | 1890.0 <sup>a</sup> | 1897.6 | 1892.5 | 1892.6 | 1900.9 | 1896.7 | 1893.0 | 1892.9 | 1892.9 | 1892.9 | 1893.3 | 1893.3 | 1893.3 |
| gdb 768  | 1887.7 <sup>a</sup> | 1897.0 | 1893.9 | 1892.3 | 1902.0 | 1896.7 | 1892.6 | 1893.8 | 1893.8 | 1893.8 | 1892.9 | 1892.9 | 1892.9 |
| gdb 769  | 1887.8 <sup>a</sup> | 1895.8 | 1891.8 | 1891.8 | 1899.8 | 1895.5 | 1890.2 | 1892.4 | 1892.4 | 1892.4 | 1891.6 | 1891.5 | 1891.5 |
| gdb 770  | 1899.4 <sup>a</sup> | 1904.5 | 1899.1 | 1900.2 | 1908.2 | 1900.8 | 1897.6 | 1897.8 | 1897.8 | 1897.8 | 1895.6 | 1895.6 | 1895.6 |
| gdb 771  | 1907.5 <sup>a</sup> | 1910.0 | 1915.5 | 1912.6 | 1916.2 | 1912.2 | 1905.9 | 1905.9 | 1905.9 | 1905.9 | 1904.1 | 1904.1 | 1904.1 |
| gdb 772  | 1888.3 <sup>a</sup> | 1900.7 | 1903.8 | 1898.4 | 1904.8 | 1902.5 | 1896.6 | 1896.6 | 1896.6 | 1896.6 | 1895.4 | 1895.4 | 1895.4 |
| gdb 773  | 1894.4 <sup>a</sup> | 1901.6 | 1907.5 | 1901.5 | 1906.9 | 1905.3 | 1898.8 | 1900.4 | 1900.4 | 1900.4 | 1899.2 | 1899.2 | 1899.2 |
| gdb 774  | 1909.4 <sup>a</sup> | 1919.2 | 1920.2 | 1920.8 | 1916.5 | 1918.7 | 1919.8 | 1920.5 | 1920.5 | 1920.5 | 1923.6 | 1923.6 | 1923.6 |
| gdb 775  | 1892.7 <sup>a</sup> | 1902.2 | 1905.0 | 1899.3 | 1904.5 | 1903.1 | 1898.4 | 1898.6 | 1898.6 | 1898.6 | 1897.5 | 1897.4 | 1897.4 |
| gdb 776  | 1891.6 <sup>a</sup> | 1902.4 | 1906.2 | 1900.7 | 1906.8 | 1904.7 | 1897.4 | 1898.7 | 1898.7 | 1898.7 | 1897.5 | 1897.5 | 1897.5 |
| gdb 777  | 1892.7 <sup>a</sup> | 1900.5 | 1905.0 | 1898.9 | 1903.2 | 1901.9 | 1894.1 | 1896.1 | 1896.1 | 1896.1 | 1895.7 | 1895.6 | 1895.6 |
| gdb 778  | 1905.8 <sup>a</sup> | 1906.9 | 1910.4 | 1906.3 | 1909.8 | 1907.9 | 1902.8 | 1903.2 | 1903.2 | 1903.2 | 1900.2 | 1900.2 | 1900.2 |
| gdb 779  | 1908.7 <sup>a</sup> | 1920.0 | 1918.3 | 1919.7 | 1907.1 | 1910.9 | 1919.5 | 1917.4 | 1917.4 | 1917.4 | 1919.9 | 1919.9 | 1919.9 |
| gdb 780  | 1889.9 <sup>a</sup> | 1908.6 | 1898.4 | 1906.9 | 1897.3 | 1899.2 | 1902.0 | 1899.0 | 1899.0 | 1899.0 | 1901.3 | 1901.2 | 1901.2 |
| gdb 781  | 1887.7 <sup>a</sup> | 1893.1 | 1887.3 | 1893.1 | 1887.1 | 1889.6 | 1897.7 | 1894.4 | 1894.4 | 1894.4 | 1897.4 | 1897.4 | 1897.4 |
| gdb 782  | 1865.1 <sup>a</sup> | 1864.8 | 1855.6 | 1859.7 | 1864.2 | 1864.2 | 1870.0 | 1866.7 | 1866.6 | 1866.6 | 1863.9 | 1863.8 | 1863.8 |
| gdb 783  | 1887.2 <sup>a</sup> | 1904.7 | 1899.7 | 1906.3 | 1895.9 | 1897.6 | 1902.6 | 1898.0 | 1898.0 | 1898.0 | 1900.5 | 1900.5 | 1900.5 |
| gdb 784  | 1885.9 <sup>a</sup> | 1889.6 | 1889.7 | 1892.7 | 1887.7 | 1889.9 | 1898.3 | 1893.7 | 1893.7 | 1893.7 | 1896.6 | 1896.6 | 1896.6 |
| gdb 785  | 1873.3 <sup>a</sup> | 1880.1 | 1865.4 | 1873.3 | 1878.5 | 1873.8 | 1872.6 | 1871.5 | 1871.4 | 1871.4 | 1869.7 | 1869.7 | 1869.7 |
| gdb 786  | 1868.1 <sup>a</sup> | 1879.1 | 1866.5 | 1872.7 | 1876.3 | 1871.3 | 1868.2 | 1868.1 | 1868.1 | 1868.1 | 1866.2 | 1866.2 | 1866.2 |
| gdb 787  | 1871.2 <sup>a</sup> | 1881.6 | 1865.2 | 1874.2 | 1872.3 | 1872.8 | 1873.5 | 1872.1 | 1872.1 | 1872.1 | 1867.6 | 1867.6 | 1867.6 |
| gdb 788  | 1863.0 <sup>a</sup> | 1865.1 | 1851.5 | 1859.6 | 1865.7 | 1864.2 | 1868.0 | 1866.2 | 1866.2 | 1866.2 | 1866.4 | 1866.4 | 1866.4 |
| gdb 789  | 1868.4 <sup>a</sup> | 1866.9 | 1854.7 | 1861.3 | 1863.5 | 1864.2 | 1869.2 | 1867.9 | 1867.9 | 1867.9 | 1864.1 | 1864.1 | 1864.1 |
| gdb 790  | 1871.4 <sup>a</sup> | 1866.2 | 1857.6 | 1862.1 | 1866.0 | 1865.4 | 1870.2 | 1869.6 | 1869.6 | 1869.6 | 1866.2 | 1866.2 | 1866.2 |
| gdb 791  | 1869.6 <sup>a</sup> | 1878.5 | 1865.8 | 1873.9 | 1873.1 | 1873.0 | 1873.4 | 1873.4 | 1873.4 | 1873.4 | 1868.5 | 1868.5 | 1868.5 |
| gdb 792  | 1870.7 <sup>a</sup> | 1879.3 | 1862.8 | 1872.8 | 1877.7 | 1874.0 | 1872.3 | 1872.5 | 1872.5 | 1872.5 | 1870.2 | 1870.1 | 1870.1 |
| gdb 793  | 1864.4 <sup>a</sup> | 1876.9 | 1864.2 | 1871.5 | 1875.0 | 1870.1 | 1867.0 | 1867.4 | 1867.4 | 1867.4 | 1865.0 | 1865.0 | 1865.0 |
| gdb 794  | 1909.0 <sup>a</sup> | 1913.1 | 1918.8 | 1920.3 | 1907.7 | 1911.6 | 1919.2 | 1919.5 | 1919.5 | 1919.5 | 1921.1 | 1921.1 | 1921.1 |
| gdb 795  | 1886.9 <sup>a</sup> | 1893.5 | 1887.9 | 1892.4 | 1894.0 | 1890.1 | 1888.0 | 1893.0 | 1893.0 | 1893.0 | 1890.4 | 1890.4 | 1890.4 |
| gdb 796  | 1886.8 <sup>a</sup> | 1893.2 | 1890.1 | 1892.6 | 1892.6 | 1888.3 | 1885.1 | 1890.5 | 1890.5 | 1890.5 | 1888.0 | 1888.0 | 1888.0 |
| gdb 797  | 1886.9 <sup>a</sup> | 1893.5 | 1890.1 | 1893.7 | 1895.5 | 1890.7 | 1885.6 | 1891.2 | 1891.2 | 1891.2 | 1889.0 | 1889.0 | 1889.0 |
| gdb 798  | 1890.9 <sup>a</sup> | 1895.4 | 1885.5 | 1892.3 | 1893.3 | 1890.2 | 1888.2 | 1892.0 | 1892.0 | 1892.0 | 1889.6 | 1889.6 | 1889.6 |
| gdb 799  | 1889.4 <sup>a</sup> | 1897.0 | 1891.0 | 1892.5 | 1893.9 | 1891.3 | 1891.3 | 1891.8 | 1891.8 | 1891.8 | 1891.9 | 1891.9 | 1891.9 |
| gdb 800  | 1890.1 <sup>a</sup> | 1896.8 | 1894.9 | 1893.5 | 1895.8 | 1891.6 | 1891.0 | 1891.2 | 1891.1 | 1891.1 | 1890.4 | 1890.4 | 1890.4 |
| gdb 801  | 1891.2 <sup>a</sup> | 1896.6 | 1895.1 | 1893.7 | 1895.8 | 1891.5 | 1890.5 | 1891.7 | 1891.7 | 1891.7 | 1891.2 | 1891.2 | 1891.2 |
| gdb 802  | 1888.4 <sup>a</sup> | 1895.8 | 1892.1 | 1892.7 | 1894.0 | 1890.5 | 1889.0 | 1889.4 | 1889.4 | 1889.4 | 1889.3 | 1889.3 | 1889.3 |
| gdb 803  | 1896.8 <sup>a</sup> | 1897.6 | 1890.9 | 1892.6 | 1889.8 | 1891.4 | 1894.8 | 1893.9 | 1893.9 | 1893.9 | 1891.0 | 1891.0 | 1891.0 |
| gdb 804  | 1904.8 <sup>a</sup> | 1899.9 | 1904.1 | 1905.5 | 1903.9 | 1902.3 | 1901.0 | 1908.6 | 1908.6 | 1908.6 | 1905.9 | 1905.9 | 1905.9 |
| gdb 805  | 1905.4 <sup>a</sup> | 1903.2 | 1901.1 | 1905.5 | 1906.6 | 1902.6 | 1904.1 | 1915.2 | 1915.2 | 1915.2 | 1908.3 | 1908.3 | 1908.3 |
| gdb 806  | 1905.5 <sup>a</sup> | 1900.1 | 1902.5 | 1905.0 | 1903.0 | 1902.4 | 1903.1 | 1910.8 | 1910.8 | 1910.8 | 1907.9 | 1907.9 | 1907.9 |
| gdb 807  | 1892.6 <sup>a</sup> | 1912.0 | 1900.7 | 1906.4 | 1904.4 | 1901.2 | 1900.3 | 1903.0 | 1903.0 | 1903.0 | 1900.2 | 1900.2 | 1900.2 |
| gdb 808  | 1889.5 <sup>a</sup> | 1910.1 | 1902.4 | 1906.4 | 1902.7 | 1898.6 | 1896.1 | 1898.7 | 1898.7 | 1898.7 | 1896.4 | 1896.3 | 1896.3 |
| gdb 809  | 1890.5 <sup>a</sup> | 1911.1 | 1902.1 | 1907.2 | 1904.7 | 1900.9 | 1898.2 | 1901.4 | 1901.4 | 1901.4 | 1898.9 | 1898.8 | 1898.8 |

... continued on next page ...

Table S26: ... continued from previous page. ...

| Molecule | Ref.                | MNDO   | AMI    | PM3    | PM6    | PM7    | OM1    | OM2    |        | OM3    |        | D3T    |
|----------|---------------------|--------|--------|--------|--------|--------|--------|--------|--------|--------|--------|--------|
|          |                     |        |        |        |        |        |        | D2     | D3     | D2     | D3     |        |
| gdb 810  | 1894.8 <sup>a</sup> | 1909.0 | 1896.9 | 1903.3 | 1900.1 | 1896.8 | 1895.4 | 1896.3 | 1896.3 | 1894.5 | 1894.5 | 1894.5 |
| gdb 811  | 1892.8 <sup>a</sup> | 1908.8 | 1897.7 | 1903.4 | 1899.9 | 1896.1 | 1894.2 | 1894.7 | 1894.7 | 1893.1 | 1893.1 | 1893.1 |
| gdb 812  | 1895.2 <sup>a</sup> | 1904.4 | 1908.5 | 1902.3 | 1900.2 | 1899.7 | 1896.8 | 1896.4 | 1896.4 | 1895.4 | 1895.4 | 1895.4 |
| gdb 813  | 1895.3 <sup>a</sup> | 1903.2 | 1909.3 | 1902.3 | 1901.6 | 1900.3 | 1895.0 | 1895.7 | 1895.7 | 1895.4 | 1895.4 | 1895.4 |
| gdb 814  | 1895.3 <sup>a</sup> | 1903.9 | 1908.2 | 1902.0 | 1899.6 | 1899.2 | 1895.0 | 1896.0 | 1896.0 | 1895.3 | 1895.4 | 1895.4 |
| gdb 815  | 1885.3 <sup>a</sup> | 1891.5 | 1889.2 | 1889.8 | 1892.2 | 1887.7 | 1885.9 | 1888.6 | 1888.6 | 1887.0 | 1887.0 | 1887.0 |
| gdb 816  | 1883.7 <sup>a</sup> | 1892.7 | 1889.9 | 1891.4 | 1895.9 | 1890.7 | 1886.8 | 1889.6 | 1889.6 | 1888.0 | 1888.0 | 1888.0 |
| gdb 817  | 1889.3 <sup>a</sup> | 1895.9 | 1888.5 | 1891.8 | 1894.2 | 1890.3 | 1888.7 | 1889.6 | 1889.6 | 1888.0 | 1888.0 | 1888.0 |
| gdb 818  | 1903.0 <sup>a</sup> | 1899.5 | 1905.0 | 1904.5 | 1904.2 | 1902.4 | 1901.9 | 1907.4 | 1907.4 | 1905.5 | 1905.5 | 1905.5 |
| gdb 819  | 1886.6 <sup>a</sup> | 1898.6 | 1894.5 | 1893.8 | 1894.8 | 1890.5 | 1891.1 | 1888.3 | 1888.3 | 1889.2 | 1889.2 | 1889.2 |
| gdb 820  | 1888.7 <sup>a</sup> | 1899.0 | 1897.0 | 1894.5 | 1896.2 | 1891.4 | 1892.3 | 1889.9 | 1889.9 | 1890.4 | 1890.3 | 1890.3 |
| gdb 821  | 1868.8 <sup>a</sup> | 1883.6 | 1870.2 | 1876.1 | 1875.2 | 1874.3 | 1875.5 | 1871.9 | 1871.9 | 1868.5 | 1868.5 | 1868.5 |
| gdb 822  | 1869.1 <sup>a</sup> | 1882.5 | 1865.9 | 1874.3 | 1878.8 | 1874.4 | 1873.1 | 1870.4 | 1870.4 | 1869.2 | 1869.2 | 1869.2 |
| gdb 823  | 1887.5 <sup>a</sup> | 1901.2 | 1891.4 | 1894.7 | 1896.7 | 1893.0 | 1894.1 | 1892.9 | 1892.8 | 1893.6 | 1893.6 | 1893.6 |
| gdb 824  | 1886.0 <sup>a</sup> | 1900.3 | 1893.5 | 1894.9 | 1895.9 | 1890.9 | 1892.9 | 1893.5 | 1893.5 | 1892.8 | 1892.8 | 1892.8 |
| gdb 825  | 1890.9 <sup>a</sup> | 1899.5 | 1889.9 | 1893.9 | 1890.4 | 1891.2 | 1895.2 | 1894.4 | 1894.4 | 1891.3 | 1891.3 | 1891.3 |
| gdb 826  | 1871.0 <sup>a</sup> | 1884.3 | 1868.6 | 1875.5 | 1879.7 | 1873.9 | 1873.0 | 1869.5 | 1869.5 | 1868.9 | 1868.9 | 1868.9 |
| gdb 827  | 1867.8 <sup>a</sup> | 1884.6 | 1869.9 | 1875.3 | 1877.7 | 1871.9 | 1871.0 | 1866.8 | 1866.8 | 1866.5 | 1866.5 | 1866.5 |
| gdb 828  | 1869.5 <sup>a</sup> | 1885.6 | 1869.4 | 1876.7 | 1874.5 | 1874.5 | 1875.8 | 1871.9 | 1871.9 | 1868.2 | 1868.2 | 1868.2 |
| gdb 829  | 1869.2 <sup>a</sup> | 1870.0 | 1860.5 | 1863.9 | 1866.8 | 1865.6 | 1872.1 | 1868.1 | 1868.1 | 1865.9 | 1865.9 | 1865.9 |
| gdb 830  | 1862.6 <sup>a</sup> | 1869.2 | 1855.6 | 1861.4 | 1867.4 | 1864.4 | 1870.0 | 1864.5 | 1864.5 | 1865.6 | 1865.6 | 1865.6 |
| gdb 831  | 1867.5 <sup>a</sup> | 1870.1 | 1858.4 | 1863.2 | 1865.5 | 1865.6 | 1871.6 | 1867.6 | 1867.6 | 1864.7 | 1864.7 | 1864.7 |
| gdb 832  | 1874.7 <sup>a</sup> | 1900.4 | 1876.1 | 1891.0 | 1891.5 | 1885.9 | 1878.6 | 1878.8 | 1878.8 | 1877.2 | 1877.2 | 1877.2 |
| gdb 833  | 1874.9 <sup>a</sup> | 1899.9 | 1878.5 | 1891.0 | 1891.8 | 1885.1 | 1877.7 | 1877.6 | 1877.5 | 1876.4 | 1876.3 | 1876.3 |
| gdb 834  | 1868.4 <sup>a</sup> | 1899.7 | 1878.5 | 1890.0 | 1888.3 | 1881.1 | 1874.2 | 1873.1 | 1873.1 | 1872.0 | 1871.9 | 1871.9 |
| gdb 835  | 1888.9 <sup>a</sup> | 1892.6 | 1888.0 | 1892.0 | 1895.8 | 1891.6 | 1887.7 | 1890.3 | 1890.3 | 1888.5 | 1888.5 | 1888.5 |
| gdb 836  | 1885.2 <sup>a</sup> | 1891.5 | 1889.5 | 1892.6 | 1896.1 | 1892.1 | 1888.4 | 1892.4 | 1892.4 | 1890.5 | 1890.4 | 1890.4 |
| gdb 837  | 1904.5 <sup>a</sup> | 1898.2 | 1905.2 | 1905.0 | 1904.3 | 1902.5 | 1901.5 | 1908.5 | 1908.5 | 1906.8 | 1906.8 | 1906.8 |
| gdb 838  | 1907.2 <sup>a</sup> | 1903.1 | 1906.6 | 1907.7 | 1908.5 | 1907.0 | 1906.9 | 1913.7 | 1913.7 | 1911.1 | 1911.1 | 1911.1 |
| gdb 839  | 1903.8 <sup>a</sup> | 1899.1 | 1905.5 | 1905.1 | 1905.0 | 1903.2 | 1902.6 | 1908.5 | 1908.5 | 1906.4 | 1906.4 | 1906.4 |
| gdb 840  | 1904.9 <sup>a</sup> | 1899.2 | 1904.5 | 1905.3 | 1905.0 | 1904.0 | 1903.7 | 1910.5 | 1910.5 | 1908.3 | 1908.3 | 1908.3 |
| gdb 841  | 1889.9 <sup>a</sup> | 1911.8 | 1902.5 | 1906.4 | 1905.3 | 1902.0 | 1901.1 | 1901.7 | 1901.7 | 1899.8 | 1899.8 | 1899.8 |
| gdb 842  | 1892.6 <sup>a</sup> | 1907.8 | 1899.5 | 1903.2 | 1900.5 | 1896.3 | 1894.9 | 1893.4 | 1893.4 | 1892.7 | 1892.7 | 1892.7 |
| gdb 843  | 1890.8 <sup>a</sup> | 1913.1 | 1904.8 | 1907.9 | 1905.9 | 1901.4 | 1900.3 | 1900.0 | 1900.0 | 1898.7 | 1898.7 | 1898.7 |
| gdb 844  | 1889.5 <sup>a</sup> | 1911.7 | 1904.8 | 1906.8 | 1903.8 | 1899.1 | 1897.7 | 1897.5 | 1897.5 | 1896.5 | 1896.5 | 1896.5 |
| gdb 845  | 1890.5 <sup>a</sup> | 1912.5 | 1904.4 | 1907.6 | 1905.7 | 1901.3 | 1899.8 | 1899.7 | 1899.7 | 1898.5 | 1898.5 | 1898.5 |
| gdb 846  | 1893.6 <sup>a</sup> | 1910.2 | 1898.9 | 1903.8 | 1901.1 | 1897.6 | 1896.7 | 1894.9 | 1894.9 | 1894.2 | 1894.2 | 1894.2 |
| gdb 847  | 1917.8 <sup>a</sup> | 1921.1 | 1927.7 | 1926.9 | 1921.1 | 1897.0 | 1923.0 | 1926.1 | 1926.1 | 1929.2 | 1929.2 | 1929.2 |
| gdb 848  | 1908.7 <sup>a</sup> | 1917.8 | 1922.5 | 1922.4 | 1908.5 | 1911.7 | 1920.8 | 1917.6 | 1917.6 | 1921.0 | 1921.0 | 1921.0 |
| gdb 849  | 1873.5 <sup>a</sup> | 1899.6 | 1876.9 | 1890.1 | 1892.1 | 1885.5 | 1878.6 | 1877.9 | 1877.9 | 1876.1 | 1876.1 | 1876.1 |
| gdb 850  | 1868.4 <sup>a</sup> | 1897.8 | 1876.9 | 1888.5 | 1887.3 | 1879.9 | 1873.4 | 1872.5 | 1872.5 | 1870.8 | 1870.7 | 1870.7 |
| gdb 851  | 1872.3 <sup>a</sup> | 1898.7 | 1876.1 | 1889.7 | 1890.3 | 1884.1 | 1876.8 | 1876.9 | 1876.9 | 1875.0 | 1875.0 | 1875.0 |
| gdb 852  | 1869.1 <sup>a</sup> | 1898.6 | 1876.7 | 1888.9 | 1888.3 | 1882.1 | 1875.2 | 1875.0 | 1875.0 | 1873.0 | 1873.0 | 1873.0 |
| gdb 853  | 1869.2 <sup>a</sup> | 1883.3 | 1870.2 | 1876.2 | 1875.2 | 1874.2 | 1875.5 | 1872.1 | 1872.1 | 1868.7 | 1868.7 | 1868.7 |
| gdb 854  | 1867.7 <sup>a</sup> | 1882.3 | 1866.7 | 1874.0 | 1878.2 | 1873.4 | 1872.0 | 1868.9 | 1868.9 | 1867.7 | 1867.7 | 1867.7 |

... continued on next page ...

Table S26: . . . continued from previous page. . . .

| Molecule | Ref.                | MNDO   | AMI    | PM3    | PM6    | PM7    | OM1    | OM2    |        | OM3    |        | D3T    |
|----------|---------------------|--------|--------|--------|--------|--------|--------|--------|--------|--------|--------|--------|
|          |                     |        |        |        |        |        |        | D2     | D3     | D2     | D3     |        |
| gdb 855  | 1866.4 <sup>a</sup> | 1882.7 | 1867.3 | 1874.1 | 1877.2 | 1872.8 | 1871.6 | 1868.5 | 1868.5 | 1867.4 | 1867.4 | 1867.4 |
| gdb 856  | 1884.7 <sup>a</sup> | 1898.0 | 1892.1 | 1894.4 | 1896.1 | 1892.5 | 1893.6 | 1895.0 | 1895.0 | 1893.7 | 1893.6 | 1893.6 |
| gdb 857  | 1885.7 <sup>a</sup> | 1897.3 | 1888.2 | 1893.0 | 1895.2 | 1893.0 | 1893.4 | 1893.4 | 1893.4 | 1893.7 | 1893.7 | 1893.7 |
| gdb 858  | 1889.6 <sup>a</sup> | 1895.9 | 1890.2 | 1893.0 | 1890.0 | 1890.3 | 1894.1 | 1894.0 | 1894.0 | 1891.0 | 1891.0 | 1891.0 |
| gdb 859  | 1884.7 <sup>a</sup> | 1896.6 | 1888.9 | 1893.2 | 1894.2 | 1891.2 | 1890.7 | 1890.9 | 1890.9 | 1891.4 | 1891.3 | 1891.3 |
| gdb 860  | 1889.0 <sup>a</sup> | 1893.2 | 1887.9 | 1891.4 | 1895.6 | 1890.3 | 1888.1 | 1890.1 | 1890.1 | 1888.4 | 1888.3 | 1888.4 |
| gdb 861  | 1883.3 <sup>a</sup> | 1890.3 | 1890.0 | 1892.3 | 1894.6 | 1889.8 | 1885.7 | 1889.5 | 1889.5 | 1887.9 | 1887.9 | 1887.9 |
| gdb 862  | 1885.8 <sup>a</sup> | 1891.3 | 1889.2 | 1891.4 | 1893.0 | 1889.1 | 1888.1 | 1891.7 | 1891.7 | 1889.6 | 1889.5 | 1889.5 |
| gdb 863  | 1885.9 <sup>a</sup> | 1895.3 | 1892.8 | 1891.1 | 1894.4 | 1891.3 | 1893.2 | 1891.4 | 1891.4 | 1890.6 | 1890.6 | 1890.6 |
| gdb 864  | 1884.7 <sup>a</sup> | 1894.4 | 1890.3 | 1890.3 | 1893.0 | 1890.5 | 1891.9 | 1889.8 | 1889.8 | 1889.7 | 1889.6 | 1889.6 |
| gdb 865  | 1893.7 <sup>a</sup> | 1894.6 | 1892.8 | 1891.9 | 1890.4 | 1891.1 | 1895.1 | 1892.4 | 1892.4 | 1890.2 | 1890.2 | 1890.2 |
| gdb 866  | 1882.8 <sup>a</sup> | 1893.4 | 1891.8 | 1891.3 | 1892.5 | 1889.2 | 1889.0 | 1887.2 | 1887.2 | 1887.2 | 1887.2 | 1887.2 |
| gdb 867  | 1892.4 <sup>a</sup> | 1907.5 | 1899.3 | 1902.5 | 1900.6 | 1896.5 | 1895.1 | 1893.5 | 1893.4 | 1892.6 | 1892.5 | 1892.5 |
| gdb 868  | 1891.2 <sup>a</sup> | 1907.4 | 1899.2 | 1902.7 | 1900.4 | 1896.3 | 1894.5 | 1893.4 | 1893.3 | 1892.4 | 1892.4 | 1892.4 |
| gdb 869  | 1888.8 <sup>a</sup> | 1910.8 | 1903.3 | 1906.7 | 1905.0 | 1900.9 | 1898.7 | 1899.2 | 1899.2 | 1897.8 | 1897.7 | 1897.7 |
| gdb 870  | 1888.3 <sup>a</sup> | 1910.8 | 1903.1 | 1905.9 | 1904.0 | 1900.4 | 1899.0 | 1899.5 | 1899.5 | 1897.8 | 1897.8 | 1897.8 |
| gdb 871  | 1890.4 <sup>a</sup> | 1899.4 | 1903.7 | 1897.6 | 1897.5 | 1897.6 | 1896.9 | 1894.8 | 1894.8 | 1893.9 | 1893.8 | 1893.8 |
| gdb 872  | 1918.4 <sup>a</sup> | 1920.7 | 1927.3 | 1926.2 | 1921.0 | 1922.8 | 1925.1 | 1925.9 | 1925.9 | 1929.1 | 1929.1 | 1929.1 |
| gdb 873  | 1889.4 <sup>a</sup> | 1895.7 | 1889.1 | 1891.8 | 1890.4 | 1890.7 | 1894.3 | 1894.4 | 1894.4 | 1890.8 | 1890.8 | 1890.8 |
| gdb 874  | 1885.6 <sup>a</sup> | 1895.6 | 1887.9 | 1891.9 | 1893.8 | 1891.0 | 1890.7 | 1891.4 | 1891.4 | 1891.5 | 1891.4 | 1891.4 |
| gdb 875  | 1883.7 <sup>a</sup> | 1896.1 | 1891.7 | 1893.2 | 1894.9 | 1890.6 | 1890.9 | 1893.2 | 1893.2 | 1891.5 | 1891.5 | 1891.5 |
| gdb 876  | 1884.6 <sup>a</sup> | 1896.6 | 1891.0 | 1893.1 | 1895.8 | 1892.0 | 1893.1 | 1895.5 | 1895.5 | 1893.5 | 1893.3 | 1893.3 |
| gdb 877  | 1908.2 <sup>a</sup> | 1917.3 | 1922.0 | 1922.0 | 1907.9 | 1911.4 | 1920.6 | 1918.1 | 1918.1 | 1921.0 | 1921.4 | 1921.4 |
| gdb 878  | 1892.6 <sup>a</sup> | 1894.0 | 1891.5 | 1890.9 | 1895.5 | 1890.3 | 1893.9 | 1891.6 | 1891.6 | 1889.3 | 1889.3 | 1889.3 |
| gdb 879  | 1884.1 <sup>a</sup> | 1893.7 | 1891.8 | 1891.3 | 1893.6 | 1890.1 | 1889.2 | 1887.9 | 1887.9 | 1887.9 | 1887.9 | 1887.9 |
| gdb 880  | 1884.9 <sup>a</sup> | 1893.8 | 1894.4 | 1891.7 | 1894.6 | 1890.8 | 1890.7 | 1889.6 | 1889.6 | 1889.1 | 1889.1 | 1889.1 |
| gdb 881  | 1885.9 <sup>a</sup> | 1895.6 | 1892.2 | 1890.8 | 1894.2 | 1891.0 | 1893.1 | 1891.2 | 1891.2 | 1890.5 | 1890.4 | 1890.4 |
| gdb 882  | 1891.8 <sup>a</sup> | 1901.0 | 1905.8 | 1899.5 | 1900.3 | 1900.2 | 1898.6 | 1897.4 | 1897.4 | 1896.4 | 1896.3 | 1896.3 |
| gdb 883  | 1888.4 <sup>a</sup> | 1899.5 | 1906.4 | 1899.6 | 1898.7 | 1897.7 | 1895.2 | 1893.5 | 1893.5 | 1892.8 | 1892.8 | 1892.8 |
| gdb 884  | 1917.5 <sup>a</sup> | 1920.6 | 1927.0 | 1925.2 | 1921.0 | 1923.0 | 1925.1 | 1926.2 | 1926.2 | 1928.7 | 1928.7 | 1928.7 |
| gdb 885  | 1888.6 <sup>a</sup> | 1898.9 | 1904.9 | 1897.7 | 1898.8 | 1897.6 | 1895.1 | 1893.5 | 1893.5 | 1892.2 | 1892.2 | 1892.2 |
| gdb 886  | 1887.6 <sup>a</sup> | 1898.9 | 1905.2 | 1897.9 | 1899.0 | 1897.6 | 1893.0 | 1891.5 | 1891.5 | 1890.8 | 1890.8 | 1890.8 |
| gdb 887  | 1890.0 <sup>a</sup> | 1900.0 | 1904.0 | 1897.6 | 1897.3 | 1897.8 | 1897.1 | 1895.3 | 1895.3 | 1894.1 | 1894.1 | 1894.1 |
| gdb 888  | 1893.6 <sup>a</sup> | 1910.0 | 1903.6 | 1909.9 | 1907.2 | 1907.5 | 1906.7 | 1905.4 | 1905.3 | 1907.5 | 1907.3 | 1907.4 |
| gdb 889  | 1891.2 <sup>a</sup> | 1894.4 | 1892.6 | 1896.9 | 1899.1 | 1899.2 | 1902.2 | 1901.2 | 1901.2 | 1904.0 | 1903.6 | 1903.6 |
| gdb 890  | 1886.9 <sup>a</sup> | 1889.0 | 1889.4 | 1893.3 | 1888.2 | 1890.2 | 1898.3 | 1894.7 | 1894.7 | 1898.0 | 1897.7 | 1897.7 |
| gdb 891  | 1867.9 <sup>a</sup> | 1864.7 | 1856.3 | 1861.6 | 1866.6 | 1865.9 | 1867.9 | 1867.5 | 1867.4 | 1864.4 | 1864.3 | 1864.3 |
| gdb 892  | 1869.6 <sup>a</sup> | 1865.8 | 1855.9 | 1862.1 | 1868.3 | 1867.7 | 1869.7 | 1869.7 | 1869.7 | 1866.4 | 1866.3 | 1866.3 |
| gdb 893  | 1880.2 <sup>a</sup> | 1875.4 | 1865.9 | 1872.7 | 1884.8 | 1879.5 | 1878.7 | 1876.1 | 1876.1 | 1875.2 | 1874.2 | 1874.2 |
| gdb 894  | 1887.9 <sup>a</sup> | 1888.1 | 1889.6 | 1895.3 | 1891.4 | 1892.1 | 1894.9 | 1894.2 | 1894.2 | 1897.7 | 1897.7 | 1897.7 |
| gdb 895  | 1892.6 <sup>a</sup> | 1902.7 | 1898.5 | 1907.0 | 1898.3 | 1899.8 | 1902.6 | 1901.1 | 1901.1 | 1903.1 | 1903.0 | 1903.0 |
| gdb 896  | 1883.5 <sup>a</sup> | 1875.5 | 1865.8 | 1875.4 | 1882.8 | 1876.6 | 1873.9 | 1881.3 | 1881.3 | 1880.5 | 1880.5 | 1880.5 |
| gdb 897  | 1880.9 <sup>a</sup> | 1875.0 | 1866.5 | 1875.6 | 1881.5 | 1874.7 | 1870.6 | 1878.1 | 1878.1 | 1877.4 | 1877.4 | 1877.4 |
| gdb 898  | 1886.1 <sup>a</sup> | 1876.9 | 1865.7 | 1877.1 | 1884.5 | 1878.5 | 1876.0 | 1883.5 | 1883.5 | 1881.6 | 1881.5 | 1881.5 |
| gdb 899  | 1903.7 <sup>a</sup> | 1889.2 | 1880.1 | 1889.7 | 1893.8 | 1887.9 | 1886.8 | 1890.8 | 1890.8 | 1887.8 | 1887.7 | 1887.7 |

. . . continued on next page . . .

Table S26: ... continued from previous page. ...

| Molecule | Ref.                | MNDO   | AMI    | PM3    | PM6    | PM7    | OM1    | OM2    |        | OM3    |        | D3T    |
|----------|---------------------|--------|--------|--------|--------|--------|--------|--------|--------|--------|--------|--------|
|          |                     |        |        |        |        |        |        | D2     | D3     | D2     | D3     |        |
| gdb 900  | 1886.1 <sup>a</sup> | 1894.7 | 1887.8 | 1891.1 | 1895.1 | 1891.1 | 1889.0 | 1889.5 | 1889.5 | 1890.3 | 1890.2 | 1890.2 |
| gdb 901  | 1886.9 <sup>a</sup> | 1893.8 | 1890.7 | 1891.8 | 1894.3 | 1889.3 | 1888.4 | 1890.3 | 1890.2 | 1890.1 | 1890.1 | 1890.1 |
| gdb 902  | 1883.9 <sup>a</sup> | 1893.3 | 1888.7 | 1891.6 | 1894.1 | 1889.5 | 1885.9 | 1887.2 | 1887.2 | 1887.8 | 1887.8 | 1887.8 |
| gdb 903  | 1894.6 <sup>a</sup> | 1894.7 | 1887.4 | 1891.9 | 1891.0 | 1891.3 | 1893.1 | 1892.8 | 1892.8 | 1890.5 | 1890.5 | 1890.5 |
| gdb 904  | 1901.6 <sup>a</sup> | 1902.3 | 1896.1 | 1901.8 | 1900.7 | 1895.3 | 1898.0 | 1895.0 | 1895.0 | 1894.2 | 1894.2 | 1894.2 |
| gdb 905  | 1871.7 <sup>a</sup> | 1892.2 | 1873.0 | 1885.2 | 1888.6 | 1882.0 | 1873.6 | 1874.1 | 1874.1 | 1872.9 | 1872.9 | 1872.9 |
| gdb 906  | 1869.0 <sup>a</sup> | 1891.6 | 1873.4 | 1885.0 | 1886.4 | 1879.8 | 1871.2 | 1871.3 | 1871.3 | 1870.3 | 1870.3 | 1870.3 |
| gdb 907  | 1887.9 <sup>a</sup> | 1905.3 | 1888.3 | 1899.3 | 1903.3 | 1896.4 | 1888.8 | 1885.5 | 1885.5 | 1885.0 | 1885.0 | 1885.0 |
| gdb 908  | 1895.0 <sup>a</sup> | 1908.5 | 1911.8 | 1907.4 | 1905.4 | 1904.6 | 1899.0 | 1899.1 | 1899.0 | 1898.8 | 1898.8 | 1898.8 |
| gdb 909  | 1895.3 <sup>a</sup> | 1908.4 | 1911.7 | 1907.4 | 1906.0 | 1904.9 | 1899.0 | 1899.3 | 1899.3 | 1899.0 | 1898.8 | 1898.8 |
| gdb 910  | 1879.7 <sup>a</sup> | 1871.8 | 1866.3 | 1872.8 | 1878.3 | 1872.4 | 1870.9 | 1875.7 | 1875.7 | 1875.5 | 1875.5 | 1875.5 |
| gdb 911  | 1881.8 <sup>a</sup> | 1873.2 | 1865.3 | 1874.0 | 1879.3 | 1873.8 | 1873.2 | 1877.9 | 1877.8 | 1876.7 | 1876.6 | 1876.6 |
| gdb 912  | 1903.5 <sup>a</sup> | 1887.1 | 1882.9 | 1887.8 | 1892.1 | 1887.4 | 1888.1 | 1889.2 | 1889.0 | 1886.4 | 1886.3 | 1886.3 |
| gdb 913  | 1882.6 <sup>a</sup> | 1895.0 | 1890.9 | 1891.8 | 1893.1 | 1888.9 | 1888.4 | 1886.5 | 1886.5 | 1887.6 | 1887.6 | 1887.6 |
| gdb 914  | 1885.8 <sup>a</sup> | 1895.5 | 1892.7 | 1892.2 | 1893.7 | 1889.1 | 1890.7 | 1889.2 | 1889.1 | 1890.0 | 1890.0 | 1890.0 |
| gdb 915  | 1902.5 <sup>a</sup> | 1905.9 | 1903.5 | 1902.9 | 1905.4 | 1900.5 | 1901.8 | 1895.6 | 1895.6 | 1895.5 | 1895.4 | 1895.4 |
| gdb 916  | 1890.0 <sup>a</sup> | 1908.2 | 1903.0 | 1909.2 | 1899.2 | 1900.1 | 1903.9 | 1899.2 | 1899.1 | 1902.5 | 1902.4 | 1902.4 |
| gdb 917  | 1866.5 <sup>a</sup> | 1885.1 | 1864.0 | 1875.1 | 1879.1 | 1872.9 | 1867.4 | 1863.2 | 1863.1 | 1864.8 | 1864.7 | 1864.7 |
| gdb 918  | 1863.1 <sup>a</sup> | 1886.0 | 1867.0 | 1875.9 | 1878.6 | 1871.5 | 1867.6 | 1864.2 | 1864.2 | 1864.4 | 1864.4 | 1864.4 |
| gdb 919  | 1872.0 <sup>a</sup> | 1888.3 | 1868.3 | 1879.4 | 1879.5 | 1877.9 | 1876.3 | 1874.2 | 1874.2 | 1871.3 | 1871.3 | 1871.3 |
| gdb 920  | 1880.5 <sup>a</sup> | 1897.1 | 1881.1 | 1888.9 | 1894.7 | 1887.5 | 1883.0 | 1877.7 | 1877.7 | 1876.7 | 1876.6 | 1876.6 |
| gdb 921  | 1865.9 <sup>a</sup> | 1869.7 | 1860.2 | 1863.6 | 1867.1 | 1866.1 | 1870.1 | 1865.6 | 1865.6 | 1863.8 | 1863.7 | 1863.7 |
| gdb 922  | 1867.7 <sup>a</sup> | 1870.2 | 1859.7 | 1864.1 | 1868.9 | 1868.3 | 1872.3 | 1868.5 | 1868.5 | 1866.0 | 1866.0 | 1866.0 |
| gdb 923  | 1879.0 <sup>a</sup> | 1879.7 | 1872.7 | 1875.0 | 1885.2 | 1879.4 | 1879.9 | 1873.7 | 1873.7 | 1872.9 | 1872.9 | 1872.9 |
| gdb 924  | 1887.3 <sup>a</sup> | 1895.1 | 1893.3 | 1897.1 | 1891.5 | 1892.5 | 1899.1 | 1893.5 | 1893.5 | 1898.3 | 1898.3 | 1898.3 |
| gdb 925  | 1868.2 <sup>a</sup> | 1883.6 | 1863.1 | 1875.5 | 1881.4 | 1875.4 | 1869.7 | 1867.1 | 1867.1 | 1868.4 | 1868.4 | 1868.4 |
| gdb 926  | 1869.8 <sup>a</sup> | 1885.6 | 1868.0 | 1878.1 | 1878.1 | 1875.6 | 1874.5 | 1872.7 | 1872.7 | 1870.2 | 1870.1 | 1870.1 |
| gdb 927  | 1885.3 <sup>a</sup> | 1896.8 | 1883.5 | 1890.5 | 1899.3 | 1891.2 | 1886.9 | 1884.4 | 1884.4 | 1881.9 | 1881.8 | 1881.8 |
| gdb 928  | 1881.5 <sup>a</sup> | 1873.8 | 1866.5 | 1875.0 | 1880.2 | 1874.8 | 1874.6 | 1879.4 | 1879.4 | 1877.8 | 1877.8 | 1877.8 |
| gdb 929  | 1880.9 <sup>a</sup> | 1872.0 | 1866.0 | 1874.4 | 1881.1 | 1875.2 | 1873.1 | 1879.3 | 1879.3 | 1878.7 | 1878.7 | 1878.7 |
| gdb 930  | 1902.3 <sup>a</sup> | 1886.6 | 1883.9 | 1889.1 | 1894.3 | 1888.9 | 1888.2 | 1890.4 | 1890.4 | 1887.7 | 1887.7 | 1887.7 |
| gdb 931  | 1884.8 <sup>a</sup> | 1891.8 | 1888.6 | 1890.1 | 1894.9 | 1890.9 | 1891.1 | 1890.5 | 1890.5 | 1890.9 | 1890.9 | 1890.9 |
| gdb 932  | 1891.4 <sup>a</sup> | 1889.7 | 1887.7 | 1889.7 | 1888.0 | 1888.4 | 1892.3 | 1890.6 | 1890.6 | 1888.7 | 1888.6 | 1888.6 |
| gdb 933  | 1905.7 <sup>a</sup> | 1902.8 | 1904.7 | 1902.4 | 1910.6 | 1904.6 | 1905.2 | 1902.4 | 1902.4 | 1900.7 | 1900.7 | 1900.7 |
| gdb 934  | 1868.1 <sup>a</sup> | 1890.7 | 1873.9 | 1883.1 | 1884.6 | 1878.3 | 1872.2 | 1869.5 | 1869.5 | 1868.7 | 1868.6 | 1868.6 |
| gdb 935  | 1868.0 <sup>a</sup> | 1890.2 | 1874.2 | 1884.0 | 1885.0 | 1878.7 | 1871.5 | 1869.1 | 1869.1 | 1868.9 | 1868.8 | 1868.8 |
| gdb 936  | 1870.1 <sup>a</sup> | 1891.5 | 1874.2 | 1884.7 | 1887.6 | 1881.4 | 1874.6 | 1872.5 | 1872.5 | 1871.9 | 1871.9 | 1871.9 |
| gdb 937  | 1884.9 <sup>a</sup> | 1904.6 | 1892.4 | 1899.3 | 1903.7 | 1896.4 | 1889.2 | 1886.2 | 1886.2 | 1883.1 | 1883.0 | 1883.0 |
| gdb 938  | 1915.3 <sup>a</sup> | 1922.3 | 1926.5 | 1927.6 | 1922.2 | 1923.1 | 1925.5 | 1925.8 | 1925.8 | 1930.1 | 1930.1 | 1930.1 |
| gdb 939  | 1870.3 <sup>a</sup> | 1885.1 | 1867.2 | 1877.2 | 1877.1 | 1875.2 | 1875.0 | 1873.2 | 1873.2 | 1870.4 | 1870.4 | 1870.4 |
| gdb 940  | 1865.3 <sup>a</sup> | 1882.3 | 1862.4 | 1874.2 | 1877.6 | 1872.1 | 1867.3 | 1864.0 | 1864.0 | 1865.5 | 1865.5 | 1865.5 |
| gdb 941  | 1866.3 <sup>a</sup> | 1884.6 | 1865.9 | 1875.7 | 1881.1 | 1874.2 | 1871.5 | 1869.6 | 1869.6 | 1869.0 | 1868.9 | 1868.9 |
| gdb 942  | 1866.3 <sup>a</sup> | 1896.0 | 1882.2 | 1889.4 | 1897.7 | 1890.6 | 1887.5 | 1885.0 | 1884.9 | 1882.1 | 1882.0 | 1882.0 |
| gdb 943  | 1891.4 <sup>a</sup> | 1907.9 | 1903.3 | 1909.5 | 1900.3 | 1901.1 | 1904.5 | 1900.2 | 1900.1 | 1903.3 | 1903.3 | 1903.3 |
| gdb 944  | 1890.9 <sup>a</sup> | 1890.7 | 1887.4 | 1889.2 | 1887.2 | 1887.7 | 1893.1 | 1891.0 | 1891.0 | 1888.2 | 1888.2 | 1888.2 |

... continued on next page ...



Table S26: ... continued from previous page. ...

| Molecule | Ref.                | MNDO   | AMI    | PM3    | PM6    | PM7    | OM1    | OM2    |        | OM3    |        | D3T    | OM3    | D3     | D3T    |
|----------|---------------------|--------|--------|--------|--------|--------|--------|--------|--------|--------|--------|--------|--------|--------|--------|
|          |                     |        |        |        |        |        |        | D2     | D3     | D2     | D3     |        |        |        |        |
| gdb 945  | 1883.5 <sup>a</sup> | 1890.1 | 1887.7 | 1888.7 | 1890.9 | 1887.1 | 1887.2 | 1887.2 | 1887.2 | 1887.2 | 1886.8 | 1887.2 | 1886.8 | 1886.8 | 1886.8 |
| gdb 946  | 1887.7 <sup>a</sup> | 1892.7 | 1890.8 | 1890.7 | 1895.9 | 1891.6 | 1893.9 | 1894.0 | 1894.0 | 1894.0 | 1893.6 | 1894.0 | 1893.6 | 1893.6 | 1893.6 |
| gdb 947  | 1907.1 <sup>a</sup> | 1902.6 | 1903.9 | 1902.0 | 1909.2 | 1903.4 | 1905.0 | 1902.1 | 1901.9 | 1901.9 | 1900.1 | 1901.9 | 1900.1 | 1900.0 | 1900.0 |
| gdb 948  | 1895.9 <sup>a</sup> | 1903.7 | 1908.6 | 1903.1 | 1904.3 | 1903.7 | 1902.0 | 1900.0 | 1900.0 | 1900.0 | 1899.6 | 1900.0 | 1899.6 | 1899.6 | 1899.6 |
| gdb 949  | 1917.1 <sup>a</sup> | 1913.6 | 1923.0 | 1914.7 | 1919.9 | 1917.4 | 1914.5 | 1911.1 | 1911.1 | 1911.1 | 1909.1 | 1911.1 | 1909.1 | 1909.1 | 1909.1 |
| gdb 950  | 1915.8 <sup>a</sup> | 1922.8 | 1926.0 | 1926.8 | 1920.7 | 1922.4 | 1926.3 | 1926.1 | 1926.1 | 1926.1 | 1930.0 | 1926.1 | 1930.0 | 1930.0 | 1930.0 |
| gdb 951  | 1892.9 <sup>a</sup> | 1901.9 | 1908.9 | 1903.2 | 1901.5 | 1900.7 | 1897.1 | 1896.4 | 1896.4 | 1896.4 | 1896.1 | 1896.4 | 1896.1 | 1896.1 | 1896.1 |
| gdb 952  | 1895.2 <sup>a</sup> | 1904.1 | 1908.3 | 1902.7 | 1903.8 | 1903.3 | 1901.7 | 1900.0 | 1900.0 | 1900.0 | 1899.4 | 1900.0 | 1899.4 | 1899.4 | 1899.4 |
| gdb 953  | 1915.8 <sup>a</sup> | 1913.5 | 1921.6 | 1913.9 | 1918.2 | 1915.8 | 1913.3 | 1910.2 | 1910.2 | 1910.2 | 1908.1 | 1910.2 | 1908.1 | 1908.1 | 1908.1 |
| gdb 954  | 1895.4 <sup>a</sup> | 1894.9 | 1892.8 | 1896.1 | 1896.2 | 1897.8 | 1905.0 | 1903.5 | 1903.5 | 1903.5 | 1906.5 | 1903.5 | 1906.5 | 1906.5 | 1906.5 |
| gdb 955  | 1892.5 <sup>a</sup> | 1890.8 | 1890.5 | 1895.3 | 1888.9 | 1890.6 | 1898.2 | 1896.5 | 1896.5 | 1896.5 | 1899.6 | 1896.5 | 1899.6 | 1899.5 | 1899.5 |
| gdb 956  | 1853.1 <sup>a</sup> | 1841.5 | 1818.7 | 1835.3 | 1847.0 | 1835.9 | 1836.5 | 1841.0 | 1841.0 | 1841.0 | 1841.4 | 1841.0 | 1841.4 | 1841.4 | 1841.4 |
| gdb 957  | 1855.7 <sup>a</sup> | 1846.5 | 1819.0 | 1835.6 | 1841.2 | 1831.4 | 1836.8 | 1839.8 | 1839.8 | 1839.8 | 1840.0 | 1839.8 | 1840.0 | 1840.0 | 1840.0 |
| gdb 958  | 1873.8 <sup>a</sup> | 1857.5 | 1836.7 | 1849.3 | 1860.6 | 1847.8 | 1847.8 | 1849.6 | 1849.4 | 1849.4 | 1848.8 | 1849.4 | 1848.8 | 1848.7 | 1848.7 |
| gdb 959  | 1864.0 <sup>a</sup> | 1869.2 | 1852.4 | 1862.9 | 1868.2 | 1862.3 | 1856.8 | 1854.3 | 1854.3 | 1854.3 | 1856.8 | 1854.3 | 1856.7 | 1856.7 | 1856.7 |
| gdb 960  | 1860.9 <sup>a</sup> | 1869.8 | 1853.5 | 1863.3 | 1867.3 | 1861.0 | 1854.8 | 1852.2 | 1852.2 | 1852.2 | 1854.5 | 1852.2 | 1854.5 | 1854.5 | 1854.5 |
| gdb 961  | 1869.4 <sup>a</sup> | 1872.1 | 1855.5 | 1866.7 | 1868.1 | 1866.7 | 1865.7 | 1865.2 | 1865.2 | 1865.2 | 1863.3 | 1865.2 | 1863.3 | 1863.3 | 1863.3 |
| gdb 962  | 1861.3 <sup>a</sup> | 1873.0 | 1854.5 | 1864.6 | 1866.3 | 1862.0 | 1861.5 | 1860.2 | 1860.2 | 1860.2 | 1860.8 | 1860.2 | 1860.8 | 1860.8 | 1860.8 |
| gdb 963  | 1883.8 <sup>a</sup> | 1884.7 | 1874.4 | 1880.0 | 1888.1 | 1880.0 | 1874.5 | 1873.0 | 1873.0 | 1873.0 | 1871.3 | 1873.0 | 1871.3 | 1871.3 | 1871.3 |
| gdb 964  | 1890.6 <sup>a</sup> | 1905.9 | 1904.7 | 1903.6 | 1899.9 | 1899.1 | 1897.9 | 1898.0 | 1898.0 | 1898.0 | 1898.2 | 1898.0 | 1898.2 | 1898.2 | 1898.2 |
| gdb 965  | 1910.9 <sup>a</sup> | 1916.9 | 1918.9 | 1915.7 | 1915.4 | 1912.6 | 1911.1 | 1907.0 | 1906.9 | 1906.9 | 1905.2 | 1906.9 | 1905.2 | 1905.2 | 1905.2 |
| gdb 966  | 1847.5 <sup>a</sup> | 1838.1 | 1819.6 | 1832.8 | 1843.3 | 1833.1 | 1835.6 | 1837.5 | 1837.5 | 1837.5 | 1838.0 | 1837.5 | 1838.0 | 1838.0 | 1838.0 |
| gdb 967  | 1851.8 <sup>a</sup> | 1842.6 | 1820.5 | 1833.0 | 1839.9 | 1831.8 | 1838.6 | 1839.0 | 1839.0 | 1839.0 | 1839.5 | 1839.0 | 1839.5 | 1839.5 | 1839.5 |
| gdb 968  | 1870.1 <sup>a</sup> | 1851.4 | 1837.0 | 1847.2 | 1858.9 | 1846.4 | 1848.0 | 1846.9 | 1846.5 | 1846.5 | 1846.7 | 1846.5 | 1846.6 | 1846.6 | 1846.6 |
| gdb 969  | 1859.4 <sup>a</sup> | 1867.1 | 1854.1 | 1862.1 | 1865.7 | 1859.8 | 1855.9 | 1850.7 | 1850.7 | 1850.7 | 1853.1 | 1850.7 | 1853.1 | 1853.1 | 1853.1 |
| gdb 970  | 1858.1 <sup>a</sup> | 1871.5 | 1856.8 | 1864.1 | 1865.8 | 1861.8 | 1862.7 | 1858.3 | 1858.3 | 1858.3 | 1858.8 | 1858.3 | 1858.7 | 1858.7 | 1858.7 |
| gdb 971  | 1881.9 <sup>a</sup> | 1882.7 | 1875.5 | 1879.3 | 1887.2 | 1879.4 | 1875.6 | 1871.7 | 1871.7 | 1871.7 | 1870.3 | 1871.7 | 1870.3 | 1870.3 | 1870.3 |
| gdb 972  | 1896.0 <sup>a</sup> | 1909.8 | 1903.7 | 1911.5 | 1907.4 | 1905.4 | 1904.1 | 1902.5 | 1902.4 | 1902.4 | 1907.2 | 1902.4 | 1907.2 | 1907.2 | 1907.2 |
| gdb 973  | 1890.3 <sup>a</sup> | 1894.8 | 1893.2 | 1896.7 | 1889.8 | 1890.9 | 1900.3 | 1895.1 | 1895.0 | 1895.0 | 1899.5 | 1895.1 | 1899.5 | 1899.5 | 1899.5 |
| gdb 974  | 1865.2 <sup>a</sup> | 1867.4 | 1856.2 | 1865.0 | 1865.6 | 1864.2 | 1864.6 | 1862.7 | 1862.7 | 1862.7 | 1860.9 | 1862.7 | 1860.9 | 1860.9 | 1860.9 |
| gdb 975  | 1863.7 <sup>a</sup> | 1865.6 | 1853.1 | 1862.1 | 1867.8 | 1862.1 | 1858.7 | 1855.4 | 1855.4 | 1855.4 | 1857.5 | 1855.4 | 1857.5 | 1857.5 | 1857.5 |
| gdb 976  | 1861.3 <sup>a</sup> | 1870.3 | 1857.6 | 1864.3 | 1867.8 | 1863.4 | 1865.1 | 1863.2 | 1863.2 | 1863.2 | 1862.5 | 1863.2 | 1862.5 | 1862.5 | 1862.5 |
| gdb 977  | 1882.4 <sup>a</sup> | 1881.3 | 1875.0 | 1878.5 | 1887.4 | 1879.5 | 1875.4 | 1872.7 | 1872.7 | 1872.7 | 1871.1 | 1872.7 | 1871.1 | 1871.1 | 1871.1 |
| gdb 978  | 1889.5 <sup>a</sup> | 1899.1 | 1901.3 | 1898.7 | 1896.5 | 1897.0 | 1899.0 | 1897.6 | 1897.6 | 1897.6 | 1896.7 | 1897.6 | 1896.7 | 1896.7 | 1896.7 |
| gdb 979  | 1910.1 <sup>a</sup> | 1909.6 | 1917.4 | 1912.1 | 1913.7 | 1910.8 | 1909.9 | 1905.9 | 1905.8 | 1905.8 | 1904.0 | 1905.8 | 1903.9 | 1903.9 | 1903.9 |
| gdb 980  | 1895.9 <sup>a</sup> | 1910.5 | 1903.3 | 1910.9 | 1905.9 | 1904.8 | 1905.0 | 1902.8 | 1902.7 | 1902.7 | 1907.0 | 1902.8 | 1907.0 | 1907.0 | 1907.0 |
| gdb 981  | 1892.6 <sup>a</sup> | 1899.5 | 1901.6 | 1900.0 | 1898.8 | 1898.2 | 1899.3 | 1899.2 | 1899.2 | 1899.2 | 1899.1 | 1899.2 | 1899.1 | 1899.1 | 1899.1 |
| gdb 982  | 1889.3 <sup>a</sup> | 1899.1 | 1899.4 | 1897.5 | 1894.3 | 1894.9 | 1898.0 | 1896.2 | 1896.2 | 1896.2 | 1895.2 | 1896.2 | 1895.2 | 1895.2 | 1895.2 |
| gdb 983  | 1910.1 <sup>a</sup> | 1910.3 | 1917.2 | 1912.0 | 1913.5 | 1910.8 | 1910.0 | 1905.8 | 1905.7 | 1905.7 | 1903.8 | 1905.7 | 1903.7 | 1903.7 | 1903.7 |
| gdb 984  | 1857.6 <sup>a</sup> | 1868.0 | 1872.7 | 1868.7 | 1859.2 | 1859.1 | 1865.8 | 1861.6 | 1861.6 | 1861.6 | 1861.2 | 1861.6 | 1861.2 | 1861.2 | 1861.2 |
| gdb 985  | 1860.9 <sup>a</sup> | 1869.7 | 1875.7 | 1870.3 | 1863.9 | 1862.2 | 1869.1 | 1864.9 | 1864.9 | 1864.9 | 1864.2 | 1864.9 | 1864.2 | 1864.2 | 1864.2 |
| gdb 986  | 1859.6 <sup>a</sup> | 1869.1 | 1875.2 | 1870.0 | 1861.2 | 1861.1 | 1867.2 | 1864.2 | 1864.2 | 1864.2 | 1863.2 | 1864.2 | 1863.2 | 1863.2 | 1863.2 |
| gdb 987  | 1882.0 <sup>a</sup> | 1880.4 | 1891.7 | 1884.9 | 1881.3 | 1878.2 | 1880.1 | 1875.3 | 1875.3 | 1875.3 | 1873.6 | 1875.3 | 1873.6 | 1873.6 | 1873.6 |
| gdb 988  | 1883.6 <sup>a</sup> | 1883.6 | 1881.8 | 1887.1 | 1884.2 | 1884.8 | 1880.6 | 1893.2 | 1893.2 | 1893.2 | 1892.4 | 1893.2 | 1892.4 | 1892.4 | 1892.4 |
| gdb 989  | 1883.0 <sup>a</sup> | 1890.5 | 1889.7 | 1888.3 | 1887.0 | 1886.1 | 1883.6 | 1888.5 | 1888.5 | 1888.5 | 1889.9 | 1888.5 | 1889.9 | 1889.8 | 1889.8 |

... continued on next page ...

Table S26: . . . continued from previous page. . . .

| Molecule | Ref.                | MNDO   | AMI    | PM3    | PM6    | PM7    | OM1    |        | OM2    |        | OM3    |        | D3T    |
|----------|---------------------|--------|--------|--------|--------|--------|--------|--------|--------|--------|--------|--------|--------|
|          |                     |        |        |        |        |        | OM1    | OM2    | D2     | D3     | D3T    | D2     |        |
| gdb 990  | 1886.8 <sup>a</sup> | 1885.8 | 1881.7 | 1887.6 | 1886.0 | 1882.4 | 1878.5 | 1886.1 | 1886.1 | 1886.1 | 1883.1 | 1883.1 | 1883.1 |
| gdb 991  | 1883.4 <sup>a</sup> | 1884.7 | 1882.1 | 1887.0 | 1886.9 | 1887.5 | 1881.5 | 1894.7 | 1894.7 | 1894.7 | 1894.0 | 1894.0 | 1894.0 |
| gdb 992  | 1857.4 <sup>a</sup> | 1860.0 | 1851.0 | 1852.8 | 1855.5 | 1854.3 | 1851.7 | 1859.9 | 1859.8 | 1859.9 | 1853.7 | 1853.7 | 1853.7 |
| gdb 993  | 1888.9 <sup>a</sup> | 1881.6 | 1883.5 | 1886.4 | 1889.9 | 1887.1 | 1879.8 | 1889.5 | 1889.5 | 1889.5 | 1886.0 | 1886.0 | 1886.0 |
| gdb 994  | 1880.0 <sup>a</sup> | 1883.0 | 1884.0 | 1885.6 | 1881.8 | 1882.5 | 1880.0 | 1888.0 | 1888.0 | 1888.0 | 1888.0 | 1888.0 | 1888.0 |
| gdb 995  | 1874.2 <sup>a</sup> | 1884.6 | 1885.8 | 1884.6 | 1875.1 | 1876.6 | 1875.7 | 1879.3 | 1879.3 | 1879.3 | 1881.3 | 1881.3 | 1881.3 |
| gdb 996  | 1874.8 <sup>a</sup> | 1885.2 | 1886.5 | 1885.7 | 1878.0 | 1878.4 | 1878.7 | 1882.4 | 1882.4 | 1882.4 | 1883.6 | 1883.6 | 1883.6 |
| gdb 997  | 1856.3 <sup>a</sup> | 1862.0 | 1852.2 | 1855.1 | 1856.1 | 1854.3 | 1848.7 | 1856.3 | 1856.2 | 1856.2 | 1850.9 | 1850.9 | 1850.9 |
| gdb 998  | 1860.3 <sup>a</sup> | 1874.8 | 1864.6 | 1865.5 | 1866.2 | 1862.3 | 1859.7 | 1862.3 | 1862.3 | 1862.3 | 1863.7 | 1863.7 | 1863.7 |
| gdb 999  | 1853.6 <sup>a</sup> | 1876.3 | 1867.8 | 1866.5 | 1867.8 | 1861.6 | 1860.8 | 1858.4 | 1858.3 | 1858.4 | 1860.4 | 1860.4 | 1860.4 |
| gdb 1000 | 1855.1 <sup>a</sup> | 1866.6 | 1855.3 | 1856.2 | 1857.3 | 1855.2 | 1851.0 | 1855.3 | 1855.3 | 1855.3 | 1850.7 | 1850.6 | 1850.6 |
| gdb 1001 | 1853.5 <sup>a</sup> | 1878.7 | 1864.1 | 1865.1 | 1867.0 | 1860.3 | 1851.8 | 1853.1 | 1853.1 | 1853.1 | 1850.7 | 1850.6 | 1850.7 |
| gdb 1002 | 1851.9 <sup>a</sup> | 1879.0 | 1865.5 | 1865.5 | 1866.4 | 1859.3 | 1850.5 | 1851.3 | 1851.3 | 1851.3 | 1849.2 | 1849.2 | 1849.2 |
| gdb 1003 | 1893.0 <sup>a</sup> | 1891.1 | 1888.7 | 1889.5 | 1894.4 | 1891.7 | 1886.1 | 1893.3 | 1893.3 | 1893.3 | 1891.3 | 1890.8 | 1890.8 |
| gdb 1004 | 1880.6 <sup>a</sup> | 1890.8 | 1889.4 | 1890.1 | 1890.0 | 1888.0 | 1882.0 | 1888.6 | 1888.6 | 1888.6 | 1890.4 | 1890.4 | 1890.4 |
| gdb 1005 | 1851.9 <sup>a</sup> | 1864.2 | 1857.0 | 1854.2 | 1856.0 | 1853.5 | 1851.8 | 1853.1 | 1853.0 | 1853.0 | 1849.1 | 1849.1 | 1849.1 |
| gdb 1006 | 1886.6 <sup>a</sup> | 1889.0 | 1892.4 | 1888.4 | 1886.1 | 1884.2 | 1880.8 | 1881.9 | 1881.7 | 1881.7 | 1879.9 | 1879.7 | 1879.7 |
| gdb 1007 | 1865.9 <sup>a</sup> | 1877.7 | 1875.2 | 1874.3 | 1868.6 | 1868.8 | 1870.3 | 1873.7 | 1873.7 | 1873.7 | 1872.2 | 1872.2 | 1872.2 |
| gdb 1008 | 1874.0 <sup>a</sup> | 1888.7 | 1889.9 | 1887.2 | 1879.1 | 1879.3 | 1879.9 | 1880.5 | 1880.5 | 1880.5 | 1883.2 | 1883.1 | 1883.1 |
| gdb 1009 | 1875.3 <sup>a</sup> | 1885.0 | 1886.7 | 1885.9 | 1878.9 | 1879.5 | 1877.3 | 1881.2 | 1881.2 | 1881.2 | 1883.0 | 1883.0 | 1883.0 |
| gdb 1010 | 1859.3 <sup>a</sup> | 1879.6 | 1867.4 | 1869.9 | 1866.0 | 1861.4 | 1854.5 | 1855.3 | 1855.3 | 1855.3 | 1858.0 | 1857.9 | 1858.0 |
| gdb 1011 | 1857.8 <sup>a</sup> | 1879.0 | 1865.8 | 1867.3 | 1865.9 | 1861.1 | 1852.2 | 1854.7 | 1854.7 | 1854.7 | 1857.7 | 1857.7 | 1857.7 |
| gdb 1012 | 1864.3 <sup>a</sup> | 1892.1 | 1880.3 | 1882.9 | 1883.8 | 1877.3 | 1866.7 | 1873.0 | 1873.0 | 1873.0 | 1872.6 | 1872.5 | 1872.5 |
| gdb 1013 | 1860.9 <sup>a</sup> | 1876.9 | 1860.3 | 1865.8 | 1867.0 | 1862.4 | 1852.7 | 1858.1 | 1858.1 | 1858.1 | 1861.0 | 1861.0 | 1861.0 |
| gdb 1014 | 1858.8 <sup>a</sup> | 1879.1 | 1861.7 | 1867.1 | 1867.6 | 1862.0 | 1852.7 | 1859.5 | 1859.5 | 1859.5 | 1856.0 | 1856.0 | 1856.0 |
| gdb 1015 | 1866.1 <sup>a</sup> | 1893.0 | 1881.2 | 1882.4 | 1881.9 | 1876.3 | 1868.5 | 1873.6 | 1873.6 | 1873.6 | 1872.6 | 1872.6 | 1872.6 |
| gdb 1016 | 1858.4 <sup>a</sup> | 1879.8 | 1862.2 | 1867.0 | 1868.9 | 1862.7 | 1853.1 | 1860.6 | 1860.6 | 1860.6 | 1856.9 | 1856.9 | 1856.9 |
| gdb 1017 | 1869.9 <sup>a</sup> | 1888.0 | 1883.3 | 1879.8 | 1881.2 | 1874.7 | 1866.4 | 1880.1 | 1880.1 | 1880.1 | 1870.7 | 1870.7 | 1870.7 |
| gdb 1018 | 1871.6 <sup>a</sup> | 1888.5 | 1880.3 | 1879.3 | 1881.9 | 1876.1 | 1869.3 | 1882.8 | 1882.8 | 1882.8 | 1873.7 | 1873.7 | 1873.7 |
| gdb 1019 | 1871.1 <sup>a</sup> | 1892.1 | 1888.2 | 1883.9 | 1884.4 | 1879.1 | 1873.2 | 1881.3 | 1881.3 | 1881.3 | 1877.8 | 1877.8 | 1877.8 |
| gdb 1020 | 1857.4 <sup>a</sup> | 1862.6 | 1852.5 | 1854.7 | 1856.2 | 1855.4 | 1847.5 | 1855.0 | 1855.0 | 1855.0 | 1850.2 | 1850.2 | 1850.2 |
| gdb 1021 | 1861.8 <sup>a</sup> | 1880.0 | 1867.4 | 1869.9 | 1867.3 | 1862.9 | 1856.1 | 1857.2 | 1857.2 | 1857.2 | 1860.4 | 1860.4 | 1860.4 |
| gdb 1022 | 1863.9 <sup>a</sup> | 1894.6 | 1881.1 | 1880.0 | 1877.9 | 1872.5 | 1868.4 | 1868.5 | 1868.5 | 1868.5 | 1868.5 | 1868.5 | 1868.5 |
| gdb 1023 | 1865.8 <sup>a</sup> | 1896.3 | 1882.6 | 1881.0 | 1878.5 | 1873.6 | 1869.8 | 1869.1 | 1869.1 | 1869.1 | 1869.4 | 1869.4 | 1869.4 |
| gdb 1024 | 1859.5 <sup>a</sup> | 1881.5 | 1865.4 | 1869.3 | 1869.6 | 1864.2 | 1853.8 | 1858.6 | 1858.6 | 1858.6 | 1855.9 | 1855.9 | 1855.9 |
| gdb 1025 | 1855.3 <sup>a</sup> | 1865.8 | 1855.9 | 1856.2 | 1857.3 | 1855.7 | 1849.7 | 1853.5 | 1853.5 | 1853.5 | 1849.7 | 1849.7 | 1849.7 |
| gdb 1026 | 1870.3 <sup>a</sup> | 1894.3 | 1889.1 | 1883.1 | 1886.3 | 1881.5 | 1874.4 | 1877.9 | 1877.9 | 1877.9 | 1875.6 | 1875.6 | 1875.6 |
| gdb 1027 | 1870.9 <sup>a</sup> | 1891.4 | 1885.4 | 1881.2 | 1884.1 | 1877.8 | 1870.9 | 1880.2 | 1880.1 | 1880.1 | 1872.1 | 1872.0 | 1872.0 |
| gdb 1028 | 1868.6 <sup>a</sup> | 1890.3 | 1883.8 | 1880.5 | 1882.2 | 1875.9 | 1869.2 | 1879.7 | 1879.6 | 1879.6 | 1871.0 | 1870.9 | 1870.9 |
| gdb 1029 | 1860.7 <sup>a</sup> | 1879.3 | 1863.5 | 1869.2 | 1870.1 | 1864.3 | 1853.4 | 1861.3 | 1861.3 | 1861.3 | 1858.1 | 1858.0 | 1858.0 |
| gdb 1030 | 1871.2 <sup>a</sup> | 1895.4 | 1892.3 | 1884.0 | 1882.9 | 1878.4 | 1874.1 | 1877.1 | 1877.1 | 1877.1 | 1875.1 | 1875.1 | 1875.1 |
| gdb 1031 | 1871.6 <sup>a</sup> | 1894.4 | 1889.4 | 1883.3 | 1882.4 | 1878.1 | 1875.6 | 1878.8 | 1878.2 | 1878.2 | 1876.1 | 1876.1 | 1876.1 |
| gdb 1032 | 1869.9 <sup>a</sup> | 1890.7 | 1885.8 | 1880.3 | 1881.6 | 1875.2 | 1869.1 | 1878.7 | 1878.7 | 1878.7 | 1870.1 | 1870.1 | 1870.1 |
| gdb 1033 | 1869.1 <sup>a</sup> | 1887.1 | 1887.4 | 1877.7 | 1879.4 | 1872.9 | 1865.4 | 1871.0 | 1871.0 | 1871.0 | 1863.8 | 1863.8 | 1863.8 |
| gdb 1034 | 1864.0 <sup>a</sup> | 1882.4 | 1880.8 | 1873.1 | 1873.8 | 1868.8 | 1860.2 | 1864.8 | 1864.8 | 1864.8 | 1860.3 | 1860.3 | 1860.3 |

. . . continued on next page . . .

Table S26: ... continued from previous page. ...

| Molecule | Ref.                | MNDO   | AMI    | PM3    | PM6    | PM7    | OM1    | OM2    |        | OM3    |        | D3T    |
|----------|---------------------|--------|--------|--------|--------|--------|--------|--------|--------|--------|--------|--------|
|          |                     |        |        |        |        |        |        | D2     | D3     | D2     | D3     |        |
| gdb 1035 | 1868.5 <sup>a</sup> | 1887.9 | 1889.9 | 1878.8 | 1878.4 | 1872.6 | 1863.0 | 1868.3 | 1868.3 | 1861.7 | 1861.7 | 1861.7 |
| gdb 1036 | 1867.4 <sup>a</sup> | 1886.3 | 1882.9 | 1875.5 | 1876.9 | 1871.4 | 1866.0 | 1870.2 | 1870.2 | 1863.4 | 1863.4 | 1863.4 |
| gdb 1037 | 1881.5 <sup>a</sup> | 1890.8 | 1888.3 | 1887.4 | 1883.8 | 1885.3 | 1882.9 | 1888.3 | 1888.2 | 1889.2 | 1889.2 | 1889.2 |
| gdb 1038 | 1881.7 <sup>a</sup> | 1884.4 | 1885.5 | 1887.0 | 1878.3 | 1880.4 | 1879.8 | 1884.9 | 1884.9 | 1886.3 | 1886.3 | 1886.3 |
| gdb 1039 | 1883.0 <sup>a</sup> | 1891.8 | 1890.7 | 1890.6 | 1888.0 | 1888.4 | 1881.2 | 1886.5 | 1886.5 | 1888.9 | 1888.8 | 1888.8 |
| gdb 1040 | 1855.4 <sup>a</sup> | 1865.1 | 1856.9 | 1854.0 | 1854.7 | 1853.4 | 1853.4 | 1853.5 | 1853.5 | 1849.4 | 1849.4 | 1849.4 |
| gdb 1041 | 1889.6 <sup>a</sup> | 1888.7 | 1892.6 | 1889.3 | 1889.6 | 1887.0 | 1883.5 | 1884.6 | 1884.5 | 1883.1 | 1883.1 | 1883.1 |
| gdb 1042 | 1874.5 <sup>a</sup> | 1888.7 | 1891.0 | 1887.7 | 1880.7 | 1881.2 | 1883.0 | 1881.7 | 1881.7 | 1882.6 | 1884.6 | 1884.6 |
| gdb 1043 | 1859.4 <sup>a</sup> | 1878.6 | 1868.7 | 1869.0 | 1868.1 | 1863.5 | 1856.0 | 1855.0 | 1855.0 | 1859.1 | 1859.1 | 1859.1 |
| gdb 1044 | 1856.2 <sup>a</sup> | 1879.9 | 1865.7 | 1867.9 | 1867.4 | 1861.4 | 1850.9 | 1854.4 | 1854.4 | 1853.0 | 1852.9 | 1852.9 |
| gdb 1045 | 1856.2 <sup>a</sup> | 1881.5 | 1868.9 | 1869.1 | 1864.0 | 1859.3 | 1859.0 | 1854.0 | 1854.0 | 1858.0 | 1857.9 | 1857.9 |
| gdb 1046 | 1854.4 <sup>a</sup> | 1882.1 | 1868.9 | 1869.0 | 1868.5 | 1861.8 | 1851.8 | 1852.0 | 1852.0 | 1851.6 | 1851.5 | 1851.6 |
| gdb 1047 | 1866.8 <sup>a</sup> | 1892.9 | 1889.8 | 1880.7 | 1881.4 | 1873.3 | 1867.6 | 1872.4 | 1872.4 | 1865.6 | 1865.6 | 1865.6 |
| gdb 1048 | 1868.9 <sup>a</sup> | 1893.5 | 1889.6 | 1881.4 | 1882.2 | 1875.9 | 1870.6 | 1875.4 | 1875.4 | 1868.5 | 1868.5 | 1868.5 |
| gdb 1049 | 1874.4 <sup>a</sup> | 1889.2 | 1889.0 | 1885.1 | 1877.0 | 1876.3 | 1879.8 | 1878.3 | 1878.3 | 1881.0 | 1881.0 | 1881.0 |
| gdb 1050 | 1864.3 <sup>a</sup> | 1876.9 | 1873.5 | 1873.2 | 1869.4 | 1866.6 | 1868.4 | 1869.9 | 1869.9 | 1869.1 | 1869.0 | 1869.1 |
| gdb 1051 | 1843.8 <sup>a</sup> | 1867.3 | 1853.0 | 1852.2 | 1853.4 | 1847.7 | 1847.9 | 1843.3 | 1843.3 | 1844.3 | 1844.2 | 1844.2 |
| gdb 1052 | 1840.3 <sup>a</sup> | 1870.3 | 1853.2 | 1853.4 | 1852.9 | 1846.8 | 1840.3 | 1839.0 | 1839.0 | 1834.8 | 1834.8 | 1834.8 |
| gdb 1053 | 1892.6 <sup>a</sup> | 1895.5 | 1894.5 | 1891.4 | 1894.7 | 1891.4 | 1887.5 | 1889.2 | 1889.2 | 1888.3 | 1888.3 | 1888.3 |
| gdb 1054 | 1869.0 <sup>a</sup> | 1881.6 | 1878.4 | 1878.4 | 1877.7 | 1876.6 | 1870.9 | 1875.8 | 1875.8 | 1874.7 | 1874.6 | 1874.6 |
| gdb 1055 | 1839.1 <sup>a</sup> | 1854.4 | 1843.5 | 1840.2 | 1845.1 | 1838.2 | 1840.2 | 1838.2 | 1838.2 | 1831.6 | 1831.6 | 1831.6 |
| gdb 1056 | 1885.5 <sup>a</sup> | 1891.4 | 1896.3 | 1890.3 | 1886.5 | 1884.1 | 1881.7 | 1880.0 | 1879.6 | 1878.8 | 1878.7 | 1878.7 |
| gdb 1057 | 1864.0 <sup>a</sup> | 1881.0 | 1880.0 | 1875.2 | 1867.1 | 1867.4 | 1870.7 | 1869.2 | 1869.2 | 1868.9 | 1868.9 | 1868.9 |
| gdb 1058 | 1861.4 <sup>a</sup> | 1879.4 | 1876.9 | 1873.6 | 1869.2 | 1864.7 | 1869.9 | 1866.4 | 1866.4 | 1866.9 | 1866.8 | 1866.9 |
| gdb 1059 | 1882.1 <sup>a</sup> | 1885.2 | 1881.5 | 1887.7 | 1885.8 | 1884.1 | 1879.2 | 1893.3 | 1893.3 | 1892.9 | 1892.9 | 1892.9 |
| gdb 1060 | 1898.2 <sup>a</sup> | 1894.2 | 1885.8 | 1898.9 | 1898.5 | 1900.0 | 1899.8 | 1909.4 | 1909.4 | 1910.1 | 1910.1 | 1910.1 |
| gdb 1061 | 1897.6 <sup>a</sup> | 1911.8 | 1899.5 | 1911.3 | 1907.0 | 1908.3 | 1906.2 | 1909.3 | 1909.3 | 1910.5 | 1910.5 | 1910.5 |
| gdb 1062 | 1895.4 <sup>a</sup> | 1896.1 | 1888.4 | 1898.0 | 1899.0 | 1900.2 | 1901.7 | 1905.6 | 1905.6 | 1907.6 | 1907.5 | 1907.5 |
| gdb 1063 | 1884.1 <sup>a</sup> | 1871.4 | 1880.3 | 1883.9 | 1884.2 | 1885.0 | 1879.6 | 1891.2 | 1891.2 | 1890.3 | 1890.3 | 1890.3 |
| gdb 1064 | 1893.2 <sup>a</sup> | 1891.8 | 1889.8 | 1896.7 | 1898.1 | 1898.8 | 1901.5 | 1903.8 | 1903.8 | 1905.7 | 1905.6 | 1905.6 |
| gdb 1065 | 1855.3 <sup>a</sup> | 1835.4 | 1813.6 | 1835.5 | 1852.6 | 1840.9 | 1835.0 | 1849.4 | 1849.4 | 1847.1 | 1847.1 | 1847.1 |
| gdb 1066 | 1867.5 <sup>a</sup> | 1851.1 | 1827.8 | 1848.0 | 1858.3 | 1848.9 | 1848.8 | 1858.4 | 1858.4 | 1859.8 | 1859.8 | 1859.8 |
| gdb 1067 | 1871.2 <sup>a</sup> | 1864.8 | 1849.3 | 1863.2 | 1874.3 | 1867.3 | 1854.5 | 1862.7 | 1862.7 | 1861.9 | 1861.9 | 1861.9 |
| gdb 1068 | 1876.4 <sup>a</sup> | 1882.7 | 1864.2 | 1878.5 | 1883.3 | 1878.8 | 1873.0 | 1878.3 | 1878.3 | 1879.9 | 1879.9 | 1879.9 |
| gdb 1069 | 1906.0 <sup>a</sup> | 1905.7 | 1899.8 | 1914.8 | 1917.5 | 1914.3 | 1904.1 | 1915.5 | 1915.5 | 1917.4 | 1917.4 | 1917.4 |
| gdb 1070 | 1899.5 <sup>a</sup> | 1893.8 | 1889.2 | 1899.7 | 1899.3 | 1899.2 | 1898.7 | 1906.7 | 1906.7 | 1908.3 | 1908.3 | 1908.3 |
| gdb 1071 | 1874.5 <sup>a</sup> | 1863.7 | 1851.9 | 1867.5 | 1875.2 | 1872.8 | 1865.0 | 1876.0 | 1876.0 | 1871.1 | 1871.1 | 1871.1 |
| gdb 1072 | 1873.7 <sup>a</sup> | 1863.0 | 1847.1 | 1864.9 | 1876.9 | 1871.0 | 1859.4 | 1869.2 | 1869.2 | 1868.4 | 1868.4 | 1868.4 |
| gdb 1073 | 1882.3 <sup>a</sup> | 1879.5 | 1867.0 | 1879.5 | 1887.4 | 1882.5 | 1877.6 | 1885.7 | 1885.7 | 1885.8 | 1885.7 | 1885.7 |
| gdb 1074 | 1909.8 <sup>a</sup> | 1905.2 | 1909.7 | 1912.0 | 1916.0 | 1916.8 | 1911.1 | 1920.1 | 1920.1 | 1920.1 | 1920.1 | 1920.1 |
| gdb 1075 | 1906.8 <sup>a</sup> | 1907.4 | 1899.6 | 1913.6 | 1916.5 | 1914.0 | 1906.2 | 1916.6 | 1916.6 | 1917.7 | 1917.7 | 1917.7 |
| gdb 1076 | 1903.3 <sup>a</sup> | 1896.7 | 1895.5 | 1901.6 | 1908.0 | 1907.9 | 1901.1 | 1914.1 | 1914.1 | 1910.6 | 1910.5 | 1910.5 |
| gdb 1077 | 1908.7 <sup>a</sup> | 1907.6 | 1908.4 | 1911.6 | 1914.5 | 1915.0 | 1910.7 | 1918.8 | 1918.8 | 1918.5 | 1918.5 | 1918.5 |
| gdb 1078 | 1902.8 <sup>a</sup> | 1895.1 | 1888.7 | 1900.6 | 1907.6 | 1906.7 | 1902.1 | 1913.9 | 1913.9 | 1914.7 | 1914.7 | 1914.7 |
| gdb 1079 | 1875.8 <sup>a</sup> | 1867.5 | 1855.7 | 1863.3 | 1874.0 | 1872.7 | 1871.0 | 1877.2 | 1877.2 | 1872.5 | 1872.4 | 1872.5 |

... continued on next page ...

Table S26: ... continued from previous page. ...

| Molecule | Ref.                | MNDO   | AMI    | PM3    | PM6    | PM7    | OM1    |        | OM2    |        | OM3    |        | D3T    |
|----------|---------------------|--------|--------|--------|--------|--------|--------|--------|--------|--------|--------|--------|--------|
|          |                     |        |        |        |        |        | D2     | D3     | D2     | D3     | D2     | D3     |        |
| gdb 1080 | 1875.4 <sup>a</sup> | 1868.9 | 1854.5 | 1864.2 | 1873.6 | 1873.3 | 1872.3 | 1877.8 | 1877.8 | 1877.8 | 1873.2 | 1873.2 | 1873.2 |
| gdb 1081 | 1896.2 <sup>a</sup> | 1891.8 | 1889.4 | 1897.9 | 1899.3 | 1899.3 | 1899.1 | 1905.4 | 1905.4 | 1905.4 | 1907.1 | 1907.1 | 1907.1 |
| gdb 1082 | 1897.3 <sup>a</sup> | 1905.0 | 1899.5 | 1910.9 | 1906.8 | 1907.4 | 1904.8 | 1910.0 | 1910.0 | 1910.0 | 1910.4 | 1910.4 | 1910.4 |
| gdb 1083 | 1864.3 <sup>a</sup> | 1847.5 | 1815.8 | 1839.9 | 1856.8 | 1845.0 | 1838.5 | 1853.4 | 1853.4 | 1853.4 | 1852.0 | 1852.0 | 1852.0 |
| gdb 1084 | 1874.6 <sup>a</sup> | 1864.5 | 1831.2 | 1853.0 | 1860.7 | 1848.8 | 1848.7 | 1857.9 | 1857.9 | 1857.9 | 1860.6 | 1860.6 | 1860.6 |
| gdb 1085 | 1888.3 <sup>a</sup> | 1876.0 | 1864.1 | 1876.2 | 1885.9 | 1880.7 | 1875.0 | 1888.2 | 1888.2 | 1888.2 | 1886.1 | 1886.1 | 1886.1 |
| gdb 1086 | 1886.9 <sup>a</sup> | 1877.0 | 1865.7 | 1877.6 | 1887.3 | 1880.5 | 1872.6 | 1886.1 | 1886.1 | 1886.1 | 1884.1 | 1884.1 | 1884.1 |
| gdb 1087 | 1891.2 <sup>a</sup> | 1878.7 | 1864.0 | 1878.3 | 1887.8 | 1882.8 | 1877.3 | 1890.2 | 1890.2 | 1890.2 | 1887.2 | 1887.2 | 1887.1 |
| gdb 1088 | 1875.9 <sup>a</sup> | 1875.2 | 1851.9 | 1868.1 | 1878.3 | 1871.5 | 1859.2 | 1867.9 | 1867.9 | 1867.9 | 1868.4 | 1868.4 | 1868.4 |
| gdb 1089 | 1876.9 <sup>a</sup> | 1874.7 | 1852.2 | 1869.0 | 1881.3 | 1873.2 | 1858.0 | 1867.2 | 1867.2 | 1867.2 | 1867.4 | 1867.4 | 1867.4 |
| gdb 1090 | 1885.1 <sup>a</sup> | 1890.6 | 1869.9 | 1883.4 | 1890.3 | 1884.0 | 1875.1 | 1881.7 | 1881.7 | 1881.7 | 1884.1 | 1884.1 | 1884.1 |
| gdb 1091 | 1882.0 <sup>a</sup> | 1877.9 | 1853.3 | 1871.5 | 1879.1 | 1877.0 | 1867.8 | 1878.7 | 1878.7 | 1878.7 | 1874.8 | 1874.7 | 1874.7 |
| gdb 1092 | 1894.6 <sup>a</sup> | 1896.7 | 1886.9 | 1892.6 | 1900.0 | 1896.5 | 1892.7 | 1900.0 | 1900.0 | 1900.0 | 1899.3 | 1899.3 | 1899.3 |
| gdb 1093 | 1895.7 <sup>a</sup> | 1896.9 | 1890.6 | 1894.3 | 1901.7 | 1896.4 | 1892.4 | 1901.1 | 1901.1 | 1901.1 | 1899.4 | 1899.4 | 1899.4 |
| gdb 1094 | 1893.3 <sup>a</sup> | 1896.5 | 1888.7 | 1894.1 | 1901.5 | 1896.6 | 1890.0 | 1898.1 | 1898.1 | 1898.1 | 1896.9 | 1896.9 | 1896.9 |
| gdb 1095 | 1901.4 <sup>a</sup> | 1897.0 | 1886.1 | 1893.3 | 1895.9 | 1896.6 | 1895.4 | 1901.4 | 1901.3 | 1901.3 | 1897.6 | 1897.6 | 1897.6 |
| gdb 1096 | 1877.6 <sup>a</sup> | 1894.2 | 1871.3 | 1886.6 | 1892.5 | 1886.6 | 1874.8 | 1880.9 | 1880.9 | 1880.9 | 1878.4 | 1878.4 | 1878.4 |
| gdb 1097 | 1875.3 <sup>a</sup> | 1893.7 | 1872.5 | 1887.1 | 1893.3 | 1886.3 | 1872.9 | 1878.6 | 1878.6 | 1878.6 | 1876.4 | 1876.4 | 1876.4 |
| gdb 1098 | 1902.0 <sup>a</sup> | 1912.4 | 1906.5 | 1910.0 | 1914.7 | 1911.7 | 1901.9 | 1913.3 | 1913.3 | 1913.3 | 1911.2 | 1911.2 | 1911.2 |
| gdb 1099 | 1901.4 <sup>a</sup> | 1910.9 | 1911.8 | 1909.5 | 1913.1 | 1911.4 | 1901.3 | 1908.6 | 1908.6 | 1908.6 | 1906.8 | 1906.8 | 1906.8 |
| gdb 1100 | 1901.9 <sup>a</sup> | 1911.0 | 1911.6 | 1909.5 | 1912.2 | 1911.0 | 1901.0 | 1908.4 | 1908.4 | 1908.4 | 1906.9 | 1906.8 | 1906.8 |
| gdb 1101 | 1861.6 <sup>a</sup> | 1844.8 | 1817.0 | 1838.8 | 1859.1 | 1846.2 | 1838.9 | 1852.3 | 1852.3 | 1852.3 | 1851.2 | 1851.1 | 1851.1 |
| gdb 1102 | 1872.6 <sup>a</sup> | 1860.2 | 1831.6 | 1850.9 | 1861.8 | 1849.6 | 1849.1 | 1857.2 | 1857.2 | 1857.2 | 1860.3 | 1860.3 | 1860.3 |
| gdb 1103 | 1886.6 <sup>a</sup> | 1874.9 | 1865.6 | 1875.5 | 1888.2 | 1881.0 | 1873.7 | 1885.2 | 1885.1 | 1885.1 | 1883.8 | 1883.8 | 1883.8 |
| gdb 1104 | 1887.7 <sup>a</sup> | 1876.0 | 1865.1 | 1876.5 | 1889.3 | 1882.3 | 1875.9 | 1886.9 | 1886.9 | 1886.9 | 1884.5 | 1884.4 | 1884.4 |
| gdb 1105 | 1884.5 <sup>a</sup> | 1888.2 | 1870.6 | 1882.4 | 1890.6 | 1884.8 | 1875.8 | 1881.0 | 1881.0 | 1881.0 | 1882.7 | 1882.7 | 1882.7 |
| gdb 1106 | 1875.6 <sup>a</sup> | 1871.9 | 1852.4 | 1867.5 | 1880.9 | 1872.8 | 1859.7 | 1866.9 | 1866.9 | 1866.9 | 1867.5 | 1867.5 | 1867.5 |
| gdb 1107 | 1869.5 <sup>a</sup> | 1873.2 | 1852.1 | 1866.7 | 1879.0 | 1870.1 | 1855.8 | 1862.1 | 1862.1 | 1862.1 | 1862.7 | 1862.7 | 1862.7 |
| gdb 1108 | 1893.2 <sup>a</sup> | 1897.1 | 1891.4 | 1895.0 | 1903.3 | 1897.8 | 1893.2 | 1898.3 | 1898.3 | 1898.3 | 1898.1 | 1898.0 | 1898.0 |
| gdb 1109 | 1896.0 <sup>a</sup> | 1896.8 | 1892.9 | 1894.9 | 1902.8 | 1897.2 | 1894.8 | 1900.6 | 1900.6 | 1900.6 | 1900.1 | 1900.1 | 1900.1 |
| gdb 1110 | 1897.4 <sup>a</sup> | 1909.7 | 1903.0 | 1911.8 | 1908.1 | 1908.2 | 1906.3 | 1908.4 | 1908.4 | 1908.4 | 1910.2 | 1910.2 | 1910.2 |
| gdb 1111 | 1901.8 <sup>a</sup> | 1894.6 | 1890.7 | 1900.1 | 1900.9 | 1901.0 | 1901.3 | 1909.1 | 1909.1 | 1909.1 | 1910.8 | 1910.8 | 1910.8 |
| gdb 1112 | 1873.9 <sup>a</sup> | 1886.4 | 1863.4 | 1877.2 | 1888.7 | 1880.6 | 1869.3 | 1873.2 | 1873.2 | 1873.2 | 1873.3 | 1873.3 | 1873.3 |
| gdb 1113 | 1873.7 <sup>a</sup> | 1887.8 | 1866.9 | 1878.5 | 1887.9 | 1879.8 | 1872.1 | 1875.5 | 1875.5 | 1875.5 | 1874.4 | 1874.4 | 1874.4 |
| gdb 1114 | 1876.7 <sup>a</sup> | 1889.3 | 1865.5 | 1880.2 | 1886.1 | 1883.9 | 1876.7 | 1880.7 | 1880.7 | 1880.7 | 1876.7 | 1876.7 | 1876.7 |
| gdb 1115 | 1907.5 <sup>a</sup> | 1899.0 | 1894.1 | 1902.6 | 1909.7 | 1908.9 | 1907.7 | 1916.2 | 1916.2 | 1916.2 | 1918.4 | 1918.4 | 1918.4 |
| gdb 1116 | 1876.1 <sup>a</sup> | 1871.7 | 1860.4 | 1866.3 | 1876.1 | 1874.1 | 1875.3 | 1878.0 | 1878.0 | 1878.0 | 1874.8 | 1874.8 | 1874.8 |
| gdb 1117 | 1874.5 <sup>a</sup> | 1871.9 | 1858.2 | 1865.6 | 1875.1 | 1874.0 | 1873.7 | 1876.6 | 1876.6 | 1876.6 | 1872.7 | 1872.7 | 1872.7 |
| gdb 1118 | 1897.8 <sup>a</sup> | 1896.8 | 1893.8 | 1899.9 | 1901.1 | 1901.0 | 1903.6 | 1905.2 | 1905.2 | 1905.2 | 1908.6 | 1908.6 | 1908.6 |
| gdb 1119 | 1878.6 <sup>a</sup> | 1873.8 | 1855.0 | 1870.8 | 1879.8 | 1876.5 | 1867.4 | 1876.4 | 1876.4 | 1876.4 | 1873.1 | 1873.1 | 1873.1 |
| gdb 1120 | 1880.9 <sup>a</sup> | 1886.2 | 1868.6 | 1881.2 | 1887.2 | 1880.8 | 1874.2 | 1878.6 | 1878.6 | 1878.6 | 1881.7 | 1881.7 | 1881.7 |
| gdb 1121 | 1874.1 <sup>a</sup> | 1870.8 | 1850.2 | 1866.6 | 1878.9 | 1872.3 | 1859.2 | 1866.7 | 1866.6 | 1866.6 | 1867.5 | 1867.4 | 1867.4 |
| gdb 1122 | 1873.8 <sup>a</sup> | 1884.8 | 1861.7 | 1876.9 | 1887.0 | 1881.1 | 1870.9 | 1874.3 | 1874.3 | 1874.3 | 1874.6 | 1874.5 | 1874.5 |
| gdb 1123 | 1877.2 <sup>a</sup> | 1886.7 | 1867.4 | 1880.3 | 1885.9 | 1882.7 | 1876.1 | 1880.7 | 1880.7 | 1880.7 | 1877.1 | 1877.0 | 1877.0 |
| gdb 1124 | 1880.2 <sup>a</sup> | 1886.4 | 1867.0 | 1880.3 | 1886.4 | 1879.9 | 1874.4 | 1878.0 | 1878.0 | 1878.0 | 1881.5 | 1881.5 | 1881.5 |

... continued on next page ...

Table S26: . . . continued from previous page. . . .

| Molecule | Ref.                | MNDO   | AMI    | PM3    | PM6    | PM7    | OM1    |        | OM2    |        | OM3    |        | D3T    |
|----------|---------------------|--------|--------|--------|--------|--------|--------|--------|--------|--------|--------|--------|--------|
|          |                     |        |        |        |        |        | D2     | D3     | D2     | D3     | D2     | D3     |        |
| gdb 1125 | 1878.8 <sup>a</sup> | 1872.2 | 1854.3 | 1870.1 | 1879.5 | 1876.3 | 1867.1 | 1876.3 | 1876.2 | 1872.7 | 1872.7 | 1872.7 | 1872.7 |
| gdb 1126 | 1871.2 <sup>a</sup> | 1871.1 | 1850.7 | 1866.4 | 1877.8 | 1870.7 | 1857.8 | 1864.9 | 1864.9 | 1865.3 | 1872.6 | 1872.6 | 1872.6 |
| gdb 1127 | 1887.4 <sup>a</sup> | 1875.2 | 1865.2 | 1877.4 | 1889.6 | 1882.0 | 1875.2 | 1888.1 | 1888.1 | 1885.1 | 1885.1 | 1885.1 | 1885.1 |
| gdb 1128 | 1885.0 <sup>a</sup> | 1872.9 | 1863.6 | 1874.8 | 1887.4 | 1878.7 | 1875.0 | 1884.8 | 1884.8 | 1882.9 | 1882.9 | 1882.9 | 1882.9 |
| gdb 1129 | 1890.0 <sup>a</sup> | 1892.5 | 1887.3 | 1891.1 | 1900.8 | 1897.0 | 1892.3 | 1898.5 | 1898.4 | 1897.6 | 1897.6 | 1897.6 | 1897.6 |
| gdb 1130 | 1898.6 <sup>a</sup> | 1892.0 | 1887.8 | 1892.1 | 1896.8 | 1896.5 | 1894.9 | 1899.7 | 1899.7 | 1896.4 | 1896.4 | 1896.4 | 1896.4 |
| gdb 1131 | 1873.1 <sup>a</sup> | 1891.0 | 1871.9 | 1885.1 | 1892.7 | 1884.7 | 1872.2 | 1876.4 | 1876.4 | 1874.4 | 1874.4 | 1874.4 | 1874.4 |
| gdb 1132 | 1875.2 <sup>a</sup> | 1891.8 | 1873.9 | 1886.3 | 1893.3 | 1886.2 | 1873.5 | 1877.6 | 1877.6 | 1876.1 | 1876.1 | 1876.1 | 1876.1 |
| gdb 1133 | 1875.7 <sup>a</sup> | 1892.6 | 1872.8 | 1886.2 | 1893.2 | 1887.1 | 1875.6 | 1879.7 | 1879.7 | 1878.0 | 1878.0 | 1878.0 | 1878.0 |
| gdb 1134 | 1922.3 <sup>a</sup> | 1924.4 | 1926.6 | 1930.0 | 1931.0 | 1931.1 | 1928.3 | 1935.0 | 1935.0 | 1937.9 | 1937.9 | 1937.9 | 1937.9 |
| gdb 1135 | 1900.1 <sup>a</sup> | 1907.3 | 1900.7 | 1906.1 | 1911.0 | 1907.2 | 1900.1 | 1909.4 | 1909.4 | 1907.5 | 1907.5 | 1907.5 | 1907.5 |
| gdb 1136 | 1877.9 <sup>a</sup> | 1886.3 | 1866.8 | 1879.2 | 1886.7 | 1883.2 | 1876.9 | 1881.9 | 1881.9 | 1877.7 | 1877.7 | 1877.7 | 1877.7 |
| gdb 1137 | 1872.2 <sup>a</sup> | 1883.4 | 1861.6 | 1877.3 | 1886.4 | 1879.6 | 1868.1 | 1871.4 | 1871.4 | 1871.6 | 1871.6 | 1871.6 | 1871.6 |
| gdb 1138 | 1872.9 <sup>a</sup> | 1885.3 | 1864.6 | 1876.6 | 1887.3 | 1880.4 | 1872.7 | 1877.1 | 1877.1 | 1875.3 | 1875.3 | 1875.3 | 1875.3 |
| gdb 1139 | 1898.5 <sup>a</sup> | 1909.5 | 1903.0 | 1911.7 | 1908.4 | 1908.5 | 1906.9 | 1908.6 | 1908.6 | 1910.7 | 1910.7 | 1910.7 | 1910.7 |
| gdb 1140 | 1897.7 <sup>a</sup> | 1890.7 | 1886.8 | 1892.0 | 1896.8 | 1896.0 | 1894.5 | 1899.5 | 1899.5 | 1895.7 | 1895.7 | 1895.7 | 1895.7 |
| gdb 1141 | 1888.5 <sup>a</sup> | 1892.2 | 1887.7 | 1891.7 | 1900.0 | 1895.1 | 1889.3 | 1895.4 | 1895.4 | 1894.8 | 1894.8 | 1894.8 | 1894.8 |
| gdb 1142 | 1892.5 <sup>a</sup> | 1894.3 | 1887.8 | 1891.9 | 1901.6 | 1894.9 | 1895.1 | 1901.9 | 1898.9 | 1897.4 | 1897.4 | 1897.4 | 1897.4 |
| gdb 1143 | 1903.0 <sup>a</sup> | 1905.5 | 1902.0 | 1905.9 | 1911.7 | 1910.5 | 1902.2 | 1912.8 | 1912.8 | 1910.4 | 1910.4 | 1910.4 | 1910.4 |
| gdb 1144 | 1901.1 <sup>a</sup> | 1904.6 | 1907.1 | 1904.0 | 1910.0 | 1909.9 | 1903.0 | 1907.8 | 1907.8 | 1906.2 | 1906.2 | 1906.2 | 1906.2 |
| gdb 1145 | 1922.8 <sup>a</sup> | 1925.9 | 1926.3 | 1929.3 | 1931.2 | 1931.3 | 1929.2 | 1935.6 | 1935.6 | 1938.0 | 1938.0 | 1938.0 | 1938.0 |
| gdb 1146 | 1899.5 <sup>a</sup> | 1903.9 | 1908.3 | 1905.5 | 1911.8 | 1909.7 | 1900.1 | 1905.8 | 1905.8 | 1904.1 | 1904.1 | 1904.1 | 1904.1 |
| gdb 1147 | 1901.2 <sup>a</sup> | 1905.3 | 1907.0 | 1904.5 | 1909.9 | 1909.9 | 1903.0 | 1908.1 | 1908.0 | 1906.3 | 1906.2 | 1906.2 | 1906.2 |
| gdb 1148 | 1901.9 <sup>a</sup> | 1897.2 | 1892.8 | 1899.6 | 1907.9 | 1907.0 | 1906.4 | 1912.7 | 1912.7 | 1914.5 | 1914.5 | 1914.5 | 1914.5 |
| gdb 1149 | 1879.8 <sup>a</sup> | 1873.4 | 1878.4 | 1883.0 | 1885.4 | 1883.6 | 1877.4 | 1889.8 | 1889.8 | 1889.1 | 1889.1 | 1889.1 | 1889.1 |
| gdb 1150 | 1890.1 <sup>a</sup> | 1871.5 | 1876.5 | 1882.0 | 1891.2 | 1888.0 | 1879.9 | 1893.6 | 1893.6 | 1889.2 | 1889.1 | 1889.1 | 1889.1 |
| gdb 1151 | 1898.5 <sup>a</sup> | 1892.3 | 1890.5 | 1897.3 | 1899.6 | 1899.9 | 1900.9 | 1906.1 | 1906.0 | 1907.8 | 1907.6 | 1907.7 | 1907.7 |
| gdb 1152 | 1860.2 <sup>a</sup> | 1843.5 | 1818.8 | 1838.2 | 1858.9 | 1845.4 | 1838.6 | 1850.1 | 1850.0 | 1849.5 | 1849.4 | 1849.4 | 1849.4 |
| gdb 1153 | 1882.8 <sup>a</sup> | 1860.4 | 1831.4 | 1850.2 | 1865.2 | 1853.3 | 1853.2 | 1859.9 | 1859.9 | 1859.3 | 1859.3 | 1859.3 | 1859.3 |
| gdb 1154 | 1870.8 <sup>a</sup> | 1871.2 | 1852.8 | 1866.0 | 1879.8 | 1871.7 | 1858.6 | 1863.3 | 1863.3 | 1864.8 | 1864.8 | 1864.8 | 1864.8 |
| gdb 1155 | 1868.6 <sup>a</sup> | 1871.6 | 1853.5 | 1866.4 | 1877.9 | 1869.9 | 1857.1 | 1861.0 | 1861.0 | 1862.2 | 1862.1 | 1862.1 | 1862.1 |
| gdb 1156 | 1876.4 <sup>a</sup> | 1874.0 | 1855.7 | 1869.6 | 1879.6 | 1876.2 | 1867.7 | 1874.2 | 1874.2 | 1871.3 | 1871.3 | 1871.3 | 1871.3 |
| gdb 1157 | 1888.5 <sup>a</sup> | 1887.1 | 1866.6 | 1879.3 | 1890.2 | 1883.6 | 1876.8 | 1879.1 | 1879.1 | 1879.0 | 1879.0 | 1879.0 | 1879.0 |
| gdb 1158 | 1897.2 <sup>a</sup> | 1907.7 | 1904.5 | 1907.5 | 1910.6 | 1908.0 | 1900.2 | 1907.0 | 1907.0 | 1906.3 | 1906.2 | 1905.9 | 1905.9 |
| gdb 1159 | 1856.2 <sup>a</sup> | 1840.0 | 1820.1 | 1835.9 | 1854.4 | 1842.4 | 1838.4 | 1846.7 | 1846.7 | 1846.4 | 1846.3 | 1846.3 | 1846.3 |
| gdb 1160 | 1874.0 <sup>a</sup> | 1851.9 | 1830.0 | 1848.3 | 1860.4 | 1848.6 | 1848.8 | 1854.5 | 1854.5 | 1853.4 | 1853.4 | 1853.4 | 1853.4 |
| gdb 1161 | 1866.2 <sup>a</sup> | 1868.9 | 1854.1 | 1865.2 | 1876.2 | 1868.5 | 1879.9 | 1859.9 | 1859.9 | 1860.9 | 1860.9 | 1860.9 | 1860.9 |
| gdb 1162 | 1885.6 <sup>a</sup> | 1885.7 | 1870.4 | 1879.5 | 1891.1 | 1884.5 | 1878.6 | 1877.4 | 1877.4 | 1877.5 | 1877.4 | 1877.4 | 1877.4 |
| gdb 1163 | 1902.6 <sup>a</sup> | 1911.5 | 1903.5 | 1914.4 | 1918.0 | 1914.2 | 1906.6 | 1911.5 | 1911.5 | 1915.0 | 1915.0 | 1915.0 | 1915.0 |
| gdb 1164 | 1897.5 <sup>a</sup> | 1896.8 | 1892.9 | 1899.4 | 1900.6 | 1900.5 | 1903.4 | 1905.2 | 1905.2 | 1908.1 | 1908.0 | 1908.1 | 1908.1 |
| gdb 1165 | 1872.3 <sup>a</sup> | 1869.2 | 1856.1 | 1868.0 | 1876.3 | 1873.1 | 1867.1 | 1871.9 | 1871.8 | 1868.9 | 1868.8 | 1868.9 | 1868.9 |
| gdb 1166 | 1870.2 <sup>a</sup> | 1867.6 | 1853.2 | 1865.2 | 1879.2 | 1871.3 | 1860.9 | 1864.4 | 1864.4 | 1865.4 | 1865.4 | 1865.4 | 1865.4 |
| gdb 1167 | 1889.8 <sup>a</sup> | 1884.9 | 1872.0 | 1880.1 | 1894.1 | 1887.0 | 1882.0 | 1883.8 | 1883.8 | 1882.2 | 1882.2 | 1882.2 | 1882.2 |
| gdb 1168 | 1919.0 <sup>a</sup> | 1913.6 | 1915.6 | 1914.6 | 1923.2 | 1921.1 | 1916.3 | 1918.6 | 1918.6 | 1917.0 | 1916.9 | 1916.9 | 1916.9 |
| gdb 1169 | 1902.9 <sup>a</sup> | 1912.3 | 1903.2 | 1913.9 | 1916.4 | 1913.6 | 1907.5 | 1911.8 | 1911.8 | 1915.0 | 1915.0 | 1915.0 | 1915.0 |

. . . continued on next page . . .

Table S26: ... continued from previous page ...

| Molecule | Ref.                | MNDO   | AMI    | PM3    | PM6    | PM7    | OM1    |        | OM2    |        | OM3    |        | D3T    |
|----------|---------------------|--------|--------|--------|--------|--------|--------|--------|--------|--------|--------|--------|--------|
|          |                     |        |        |        |        |        | PM6    | PM7    | D2     | D3     | D2     | D3     |        |
| gdb 1170 | 1898.9 <sup>a</sup> | 1900.9 | 1901.7 | 1902.5 | 1910.1 | 1906.9 | 1900.6 | 1908.3 | 1908.2 | 1908.2 | 1907.0 | 1907.0 | 1907.0 |
| gdb 1171 | 1911.0 <sup>a</sup> | 1908.2 | 1908.5 | 1912.6 | 1914.6 | 1911.4 | 1908.1 | 1911.5 | 1911.4 | 1911.5 | 1908.9 | 1908.8 | 1908.9 |
| gdb 1172 | 1865.6 <sup>a</sup> | 1869.8 | 1873.2 | 1871.9 | 1870.3 | 1868.8 | 1868.8 | 1870.5 | 1870.5 | 1870.5 | 1869.5 | 1869.5 | 1869.5 |
| gdb 1173 | 1867.4 <sup>a</sup> | 1871.5 | 1875.2 | 1872.4 | 1871.1 | 1870.5 | 1869.8 | 1872.9 | 1872.9 | 1872.9 | 1871.2 | 1871.2 | 1871.2 |
| gdb 1174 | 1888.4 <sup>a</sup> | 1883.0 | 1890.2 | 1886.8 | 1889.0 | 1886.1 | 1882.7 | 1884.5 | 1884.2 | 1884.2 | 1882.7 | 1882.7 | 1882.7 |
| gdb 1175 | 1878.1 <sup>a</sup> | 1866.4 | 1875.8 | 1878.7 | 1870.0 | 1872.4 | 1872.5 | 1880.9 | 1880.8 | 1880.9 | 1880.0 | 1880.0 | 1880.0 |
| gdb 1176 | 1873.2 <sup>a</sup> | 1864.5 | 1876.6 | 1879.0 | 1871.3 | 1872.6 | 1873.5 | 1880.7 | 1880.6 | 1880.6 | 1878.8 | 1878.8 | 1878.8 |
| gdb 1177 | 1878.6 <sup>a</sup> | 1874.6 | 1879.9 | 1880.8 | 1878.6 | 1878.8 | 1877.0 | 1884.3 | 1884.3 | 1884.3 | 1883.9 | 1883.9 | 1883.9 |
| gdb 1178 | 1876.7 <sup>a</sup> | 1873.2 | 1880.9 | 1882.7 | 1881.2 | 1880.4 | 1876.1 | 1885.2 | 1885.2 | 1885.2 | 1884.7 | 1884.6 | 1884.6 |
| gdb 1179 | 1850.3 <sup>a</sup> | 1848.1 | 1847.4 | 1845.3 | 1846.5 | 1845.5 | 1846.2 | 1849.0 | 1849.0 | 1849.0 | 1843.0 | 1843.0 | 1843.0 |
| gdb 1180 | 1848.4 <sup>a</sup> | 1847.3 | 1848.0 | 1846.7 | 1848.1 | 1846.5 | 1845.5 | 1848.5 | 1848.5 | 1848.5 | 1843.0 | 1843.0 | 1843.0 |
| gdb 1181 | 1855.5 <sup>a</sup> | 1862.2 | 1862.0 | 1857.8 | 1862.5 | 1856.6 | 1860.0 | 1859.8 | 1859.7 | 1859.8 | 1858.8 | 1858.7 | 1858.7 |
| gdb 1182 | 1857.0 <sup>a</sup> | 1863.5 | 1860.3 | 1862.5 | 1861.4 | 1857.1 | 1852.5 | 1852.8 | 1852.8 | 1852.8 | 1854.8 | 1854.8 | 1854.8 |
| gdb 1183 | 1855.6 <sup>a</sup> | 1861.3 | 1859.9 | 1862.1 | 1863.8 | 1857.7 | 1853.0 | 1855.9 | 1855.9 | 1855.9 | 1856.1 | 1856.1 | 1856.1 |
| gdb 1184 | 1857.5 <sup>a</sup> | 1864.5 | 1859.6 | 1861.6 | 1861.0 | 1857.0 | 1855.3 | 1857.9 | 1857.9 | 1857.9 | 1858.5 | 1858.5 | 1858.5 |
| gdb 1185 | 1855.0 <sup>a</sup> | 1851.1 | 1846.3 | 1852.6 | 1853.2 | 1851.3 | 1845.6 | 1853.3 | 1853.3 | 1853.3 | 1847.2 | 1847.2 | 1847.2 |
| gdb 1186 | 1853.7 <sup>a</sup> | 1864.0 | 1857.1 | 1860.8 | 1860.5 | 1854.8 | 1846.0 | 1851.8 | 1851.8 | 1851.8 | 1848.3 | 1848.3 | 1848.3 |
| gdb 1187 | 1854.9 <sup>a</sup> | 1861.9 | 1855.3 | 1861.1 | 1864.0 | 1857.5 | 1847.3 | 1854.0 | 1854.0 | 1854.0 | 1849.6 | 1849.6 | 1849.6 |
| gdb 1188 | 1851.2 <sup>a</sup> | 1861.7 | 1857.5 | 1861.1 | 1861.2 | 1854.2 | 1844.2 | 1850.6 | 1850.6 | 1850.6 | 1846.1 | 1846.1 | 1846.1 |
| gdb 1189 | 1860.9 <sup>a</sup> | 1877.3 | 1872.3 | 1874.3 | 1873.2 | 1868.7 | 1864.0 | 1867.0 | 1867.0 | 1867.0 | 1865.3 | 1865.3 | 1865.3 |
| gdb 1190 | 1853.5 <sup>a</sup> | 1866.5 | 1860.9 | 1861.5 | 1857.6 | 1853.2 | 1853.7 | 1851.5 | 1851.5 | 1851.5 | 1853.4 | 1853.4 | 1853.4 |
| gdb 1191 | 1853.3 <sup>a</sup> | 1866.7 | 1861.5 | 1863.0 | 1861.2 | 1855.6 | 1854.8 | 1854.7 | 1854.7 | 1854.7 | 1855.3 | 1855.3 | 1855.3 |
| gdb 1192 | 1854.3 <sup>a</sup> | 1867.5 | 1858.3 | 1862.2 | 1864.7 | 1858.0 | 1850.0 | 1853.1 | 1853.1 | 1853.1 | 1849.6 | 1849.5 | 1849.5 |
| gdb 1193 | 1857.9 <sup>a</sup> | 1879.8 | 1872.4 | 1871.9 | 1870.3 | 1866.1 | 1864.1 | 1862.8 | 1862.7 | 1862.8 | 1861.5 | 1861.5 | 1861.5 |
| gdb 1194 | 1854.7 <sup>a</sup> | 1852.9 | 1847.5 | 1853.5 | 1854.7 | 1852.0 | 1846.0 | 1853.8 | 1853.8 | 1853.8 | 1847.9 | 1847.9 | 1847.9 |
| gdb 1195 | 1855.5 <sup>a</sup> | 1863.4 | 1858.7 | 1861.0 | 1863.7 | 1858.0 | 1853.4 | 1857.2 | 1857.2 | 1857.2 | 1857.8 | 1857.8 | 1857.8 |
| gdb 1196 | 1852.7 <sup>a</sup> | 1867.1 | 1860.5 | 1862.4 | 1862.0 | 1856.1 | 1846.9 | 1850.2 | 1852.2 | 1852.2 | 1847.2 | 1847.2 | 1847.2 |
| gdb 1197 | 1851.4 <sup>a</sup> | 1867.6 | 1858.9 | 1861.5 | 1862.2 | 1855.6 | 1848.3 | 1850.8 | 1850.8 | 1850.8 | 1847.2 | 1847.2 | 1847.2 |
| gdb 1198 | 1852.7 <sup>a</sup> | 1867.5 | 1859.5 | 1862.3 | 1863.9 | 1856.7 | 1848.8 | 1851.4 | 1851.4 | 1851.4 | 1848.2 | 1848.2 | 1848.2 |
| gdb 1199 | 1858.8 <sup>a</sup> | 1880.2 | 1874.5 | 1873.9 | 1872.3 | 1866.8 | 1863.5 | 1862.9 | 1862.8 | 1862.8 | 1862.0 | 1862.0 | 1862.0 |
| gdb 1200 | 1866.1 <sup>a</sup> | 1877.7 | 1882.7 | 1874.6 | 1875.0 | 1868.7 | 1863.8 | 1872.0 | 1871.9 | 1871.9 | 1862.6 | 1862.6 | 1862.6 |
| gdb 1201 | 1866.3 <sup>a</sup> | 1878.1 | 1881.2 | 1874.5 | 1875.5 | 1870.2 | 1865.8 | 1873.3 | 1873.3 | 1873.3 | 1864.0 | 1864.0 | 1864.0 |
| gdb 1202 | 1867.3 <sup>a</sup> | 1881.7 | 1884.4 | 1877.6 | 1877.7 | 1873.1 | 1871.6 | 1873.7 | 1873.7 | 1873.7 | 1870.3 | 1870.3 | 1870.3 |
| gdb 1203 | 1865.7 <sup>a</sup> | 1880.6 | 1885.7 | 1878.0 | 1876.5 | 1871.4 | 1869.1 | 1872.0 | 1872.0 | 1872.0 | 1868.5 | 1868.8 | 1868.8 |
| gdb 1204 | 1855.6 <sup>a</sup> | 1841.4 | 1840.2 | 1847.1 | 1850.5 | 1849.2 | 1843.5 | 1856.1 | 1856.1 | 1856.1 | 1848.8 | 1848.7 | 1848.7 |
| gdb 1205 | 1859.6 <sup>a</sup> | 1854.2 | 1851.7 | 1856.7 | 1860.7 | 1857.4 | 1854.7 | 1863.6 | 1863.6 | 1863.6 | 1862.0 | 1862.0 | 1862.0 |
| gdb 1206 | 1856.2 <sup>a</sup> | 1861.3 | 1854.1 | 1859.2 | 1862.4 | 1856.8 | 1848.5 | 1854.4 | 1854.4 | 1854.4 | 1850.0 | 1850.0 | 1850.0 |
| gdb 1207 | 1851.9 <sup>a</sup> | 1860.7 | 1854.7 | 1859.0 | 1861.5 | 1854.9 | 1845.8 | 1852.7 | 1852.6 | 1852.7 | 1847.9 | 1847.9 | 1847.9 |
| gdb 1208 | 1853.4 <sup>a</sup> | 1858.4 | 1848.8 | 1851.4 | 1853.9 | 1852.0 | 1847.4 | 1856.2 | 1856.2 | 1856.2 | 1850.3 | 1850.3 | 1850.3 |
| gdb 1209 | 1875.6 <sup>a</sup> | 1883.2 | 1882.1 | 1885.5 | 1879.6 | 1879.4 | 1876.2 | 1883.9 | 1883.9 | 1883.9 | 1885.3 | 1885.3 | 1885.3 |
| gdb 1210 | 1881.9 <sup>a</sup> | 1872.0 | 1879.5 | 1883.0 | 1882.5 | 1883.3 | 1878.6 | 1889.8 | 1889.8 | 1889.8 | 1888.5 | 1888.5 | 1888.5 |
| gdb 1211 | 1876.4 <sup>a</sup> | 1866.3 | 1876.5 | 1879.9 | 1876.3 | 1877.1 | 1874.1 | 1883.0 | 1883.0 | 1883.0 | 1882.2 | 1882.2 | 1882.2 |
| gdb 1212 | 1858.9 <sup>a</sup> | 1844.0 | 1843.5 | 1848.4 | 1852.8 | 1852.1 | 1844.9 | 1857.2 | 1857.2 | 1857.2 | 1849.8 | 1849.8 | 1849.8 |
| gdb 1213 | 1858.2 <sup>a</sup> | 1848.9 | 1847.5 | 1851.0 | 1854.3 | 1853.0 | 1847.4 | 1855.3 | 1855.3 | 1855.3 | 1849.2 | 1849.2 | 1849.2 |
| gdb 1214 | 1879.1 <sup>a</sup> | 1881.2 | 1883.6 | 1886.3 | 1880.2 | 1879.7 | 1878.1 | 1884.7 | 1884.7 | 1884.7 | 1885.7 | 1885.7 | 1885.7 |

... continued on next page ...

Table S26: . . . continued from previous page . . .

| Molecule | Ref.                | MNDO   | AMI    | PM3    | PM6    | PM7    | OM1    | OM2    |        | OM3    |        | D3T    |
|----------|---------------------|--------|--------|--------|--------|--------|--------|--------|--------|--------|--------|--------|
|          |                     |        |        |        |        |        |        | D2     | D3     | D2     | D3     |        |
| gdb 1215 | 1887.6 <sup>a</sup> | 1868.4 | 1873.6 | 1880.2 | 1886.2 | 1883.0 | 1875.3 | 1887.6 | 1887.6 | 1883.3 | 1883.3 | 1883.3 |
| gdb 1216 | 1878.1 <sup>a</sup> | 1871.0 | 1877.1 | 1882.1 | 1881.2 | 1879.9 | 1874.7 | 1885.3 | 1885.3 | 1884.9 | 1884.9 | 1884.9 |
| gdb 1217 | 1856.6 <sup>a</sup> | 1846.7 | 1848.0 | 1848.8 | 1852.0 | 1851.2 | 1848.7 | 1854.2 | 1854.2 | 1848.4 | 1848.3 | 1848.3 |
| gdb 1218 | 1854.1 <sup>a</sup> | 1846.6 | 1846.9 | 1848.2 | 1851.7 | 1850.2 | 1847.6 | 1855.5 | 1855.5 | 1848.4 | 1848.4 | 1848.4 |
| gdb 1219 | 1888.5 <sup>a</sup> | 1867.5 | 1881.1 | 1882.0 | 1887.1 | 1884.1 | 1877.3 | 1885.3 | 1885.3 | 1881.2 | 1881.1 | 1881.1 |
| gdb 1220 | 1876.3 <sup>a</sup> | 1869.7 | 1880.5 | 1881.6 | 1877.8 | 1878.0 | 1875.5 | 1880.8 | 1880.8 | 1881.5 | 1881.5 | 1881.5 |
| gdb 1221 | 1862.7 <sup>a</sup> | 1856.8 | 1864.7 | 1869.1 | 1864.7 | 1864.7 | 1862.8 | 1871.9 | 1871.9 | 1868.1 | 1868.0 | 1868.0 |
| gdb 1222 | 1874.7 <sup>a</sup> | 1869.8 | 1880.2 | 1881.0 | 1872.8 | 1874.4 | 1874.4 | 1879.4 | 1879.4 | 1879.8 | 1879.8 | 1879.8 |
| gdb 1223 | 1885.1 <sup>a</sup> | 1870.1 | 1882.3 | 1882.1 | 1880.7 | 1878.5 | 1873.6 | 1880.7 | 1880.6 | 1876.1 | 1876.0 | 1876.0 |
| gdb 1224 | 1864.8 <sup>a</sup> | 1859.2 | 1865.3 | 1868.9 | 1866.5 | 1865.3 | 1863.9 | 1874.1 | 1874.1 | 1870.2 | 1870.2 | 1870.2 |
| gdb 1225 | 1874.6 <sup>a</sup> | 1871.3 | 1879.2 | 1880.8 | 1874.4 | 1874.8 | 1875.6 | 1881.9 | 1881.9 | 1882.0 | 1882.0 | 1882.0 |
| gdb 1226 | 1871.8 <sup>a</sup> | 1886.7 | 1884.4 | 1884.5 | 1873.9 | 1875.3 | 1877.8 | 1880.0 | 1880.0 | 1881.1 | 1881.1 | 1881.1 |
| gdb 1227 | 1874.1 <sup>a</sup> | 1887.8 | 1884.6 | 1884.1 | 1877.3 | 1877.8 | 1879.3 | 1882.6 | 1882.6 | 1883.3 | 1883.3 | 1883.3 |
| gdb 1228 | 1853.8 <sup>a</sup> | 1863.3 | 1851.6 | 1854.0 | 1855.5 | 1853.4 | 1846.4 | 1854.2 | 1854.2 | 1849.5 | 1849.5 | 1849.5 |
| gdb 1229 | 1856.2 <sup>a</sup> | 1874.2 | 1862.6 | 1863.1 | 1865.1 | 1860.3 | 1854.5 | 1858.9 | 1858.9 | 1860.2 | 1860.2 | 1860.2 |
| gdb 1230 | 1855.8 <sup>a</sup> | 1877.0 | 1868.5 | 1865.7 | 1868.1 | 1862.1 | 1857.1 | 1857.5 | 1857.5 | 1859.5 | 1859.5 | 1859.5 |
| gdb 1231 | 1853.6 <sup>a</sup> | 1865.8 | 1854.2 | 1854.9 | 1856.2 | 1854.0 | 1849.7 | 1853.7 | 1853.7 | 1849.6 | 1849.6 | 1849.6 |
| gdb 1232 | 1850.0 <sup>a</sup> | 1878.1 | 1863.0 | 1864.3 | 1865.7 | 1858.6 | 1850.7 | 1853.3 | 1853.3 | 1850.8 | 1850.7 | 1850.7 |
| gdb 1233 | 1850.2 <sup>a</sup> | 1879.5 | 1865.7 | 1864.8 | 1865.8 | 1858.8 | 1849.9 | 1852.0 | 1852.0 | 1849.7 | 1849.7 | 1849.7 |
| gdb 1234 | 1879.4 <sup>a</sup> | 1891.3 | 1889.0 | 1889.8 | 1888.5 | 1887.7 | 1881.2 | 1889.1 | 1888.7 | 1890.5 | 1890.5 | 1890.5 |
| gdb 1235 | 1850.6 <sup>a</sup> | 1864.8 | 1855.9 | 1853.5 | 1854.6 | 1852.1 | 1850.5 | 1852.2 | 1852.2 | 1848.5 | 1848.5 | 1848.5 |
| gdb 1236 | 1883.4 <sup>a</sup> | 1889.6 | 1889.4 | 1887.1 | 1883.7 | 1880.5 | 1879.1 | 1879.8 | 1880.5 | 1877.7 | 1877.7 | 1877.7 |
| gdb 1237 | 1872.4 <sup>a</sup> | 1889.6 | 1889.1 | 1886.6 | 1878.2 | 1878.0 | 1879.8 | 1880.2 | 1880.2 | 1882.9 | 1882.9 | 1882.9 |
| gdb 1238 | 1874.2 <sup>a</sup> | 1876.2 | 1877.8 | 1879.7 | 1874.6 | 1876.9 | 1877.5 | 1883.8 | 1883.7 | 1882.3 | 1882.2 | 1882.2 |
| gdb 1239 | 1878.8 <sup>a</sup> | 1876.3 | 1879.9 | 1880.4 | 1876.6 | 1878.5 | 1878.2 | 1885.4 | 1885.4 | 1884.3 | 1884.3 | 1884.3 |
| gdb 1240 | 1885.8 <sup>a</sup> | 1879.6 | 1884.2 | 1883.3 | 1884.6 | 1882.8 | 1881.2 | 1885.7 | 1885.6 | 1882.0 | 1881.9 | 1881.9 |
| gdb 1241 | 1878.0 <sup>a</sup> | 1879.0 | 1884.7 | 1882.9 | 1880.1 | 1880.9 | 1880.4 | 1883.6 | 1883.6 | 1884.7 | 1884.7 | 1884.7 |
| gdb 1242 | 1878.4 <sup>a</sup> | 1875.2 | 1879.5 | 1880.9 | 1881.0 | 1880.8 | 1877.4 | 1884.4 | 1884.4 | 1884.7 | 1884.7 | 1884.7 |
| gdb 1243 | 1851.3 <sup>a</sup> | 1848.5 | 1847.6 | 1846.0 | 1851.0 | 1847.6 | 1847.5 | 1850.1 | 1850.1 | 1844.5 | 1844.5 | 1844.5 |
| gdb 1244 | 1875.4 <sup>a</sup> | 1866.6 | 1873.8 | 1877.1 | 1867.2 | 1869.7 | 1872.8 | 1881.3 | 1881.2 | 1879.1 | 1879.1 | 1879.1 |
| gdb 1245 | 1874.8 <sup>a</sup> | 1865.5 | 1876.1 | 1879.0 | 1871.4 | 1873.1 | 1870.8 | 1882.7 | 1882.7 | 1879.4 | 1879.4 | 1879.4 |
| gdb 1246 | 1871.4 <sup>a</sup> | 1881.7 | 1883.2 | 1883.2 | 1872.4 | 1873.0 | 1876.0 | 1879.9 | 1879.9 | 1880.5 | 1880.5 | 1880.5 |
| gdb 1247 | 1874.3 <sup>a</sup> | 1882.9 | 1885.2 | 1884.4 | 1876.3 | 1876.3 | 1876.6 | 1880.8 | 1880.8 | 1882.2 | 1882.2 | 1882.2 |
| gdb 1248 | 1873.9 <sup>a</sup> | 1872.7 | 1876.4 | 1878.3 | 1871.5 | 1872.7 | 1874.2 | 1881.5 | 1881.5 | 1879.7 | 1879.7 | 1879.7 |
| gdb 1249 | 1876.2 <sup>a</sup> | 1873.3 | 1878.7 | 1879.5 | 1877.9 | 1876.1 | 1876.7 | 1883.5 | 1883.5 | 1882.9 | 1882.9 | 1882.9 |
| gdb 1250 | 1872.8 <sup>a</sup> | 1871.9 | 1883.8 | 1881.4 | 1875.5 | 1875.4 | 1875.2 | 1877.6 | 1877.6 | 1878.9 | 1878.8 | 1878.8 |
| gdb 1251 | 1883.4 <sup>a</sup> | 1871.2 | 1881.9 | 1881.2 | 1879.8 | 1878.1 | 1877.1 | 1881.0 | 1881.0 | 1876.6 | 1876.6 | 1876.6 |
| gdb 1252 | 1874.1 <sup>a</sup> | 1872.2 | 1882.1 | 1879.6 | 1875.4 | 1874.2 | 1876.2 | 1878.4 | 1878.4 | 1879.7 | 1879.7 | 1879.7 |
| gdb 1253 | 1858.0 <sup>a</sup> | 1851.9 | 1847.1 | 1850.8 | 1852.3 | 1851.4 | 1846.7 | 1852.6 | 1852.5 | 1847.0 | 1847.0 | 1847.0 |
| gdb 1254 | 1861.4 <sup>a</sup> | 1864.1 | 1862.5 | 1862.7 | 1865.4 | 1860.9 | 1853.5 | 1857.4 | 1857.4 | 1858.0 | 1858.0 | 1858.0 |
| gdb 1255 | 1856.3 <sup>a</sup> | 1850.8 | 1849.5 | 1849.6 | 1851.5 | 1850.5 | 1848.6 | 1852.2 | 1852.1 | 1846.7 | 1846.7 | 1846.7 |
| gdb 1256 | 1858.4 <sup>a</sup> | 1862.5 | 1860.7 | 1860.7 | 1863.1 | 1858.3 | 1852.0 | 1855.8 | 1855.8 | 1856.3 | 1856.3 | 1856.3 |
| gdb 1257 | 1856.9 <sup>a</sup> | 1852.0 | 1846.2 | 1851.4 | 1852.2 | 1851.9 | 1843.8 | 1852.1 | 1852.1 | 1846.3 | 1846.2 | 1846.2 |
| gdb 1258 | 1856.1 <sup>a</sup> | 1862.4 | 1855.5 | 1860.8 | 1863.9 | 1858.1 | 1847.5 | 1855.0 | 1855.0 | 1850.4 | 1850.4 | 1850.4 |
| gdb 1259 | 1854.1 <sup>a</sup> | 1863.0 | 1858.9 | 1861.5 | 1863.1 | 1856.9 | 1844.9 | 1851.8 | 1851.8 | 1847.6 | 1847.6 | 1847.6 |

. . . continued on next page . . .

Table S26: ... continued from previous page ...

| Molecule | Ref.                | MNDO   | AMI    | PM3    | PM6    | PM7    | OM1    |        | OM2    |        | OM3    |        | D3T    |
|----------|---------------------|--------|--------|--------|--------|--------|--------|--------|--------|--------|--------|--------|--------|
|          |                     |        |        |        |        |        | OM1    | OM2    | D2     | D3     | D3T    | D2     |        |
| gdb 1260 | 1846.8 <sup>a</sup> | 1850.3 | 1817.3 | 1835.3 | 1850.3 | 1836.9 | 1826.4 | 1831.0 | 1831.0 | 1831.0 | 1831.1 | 1831.0 | 1831.0 |
| gdb 1261 | 1858.2 <sup>a</sup> | 1840.6 | 1811.9 | 1834.8 | 1849.9 | 1836.6 | 1834.7 | 1847.0 | 1846.9 | 1846.9 | 1845.4 | 1845.4 | 1845.4 |
| gdb 1262 | 1871.5 <sup>a</sup> | 1858.2 | 1830.2 | 1849.5 | 1861.9 | 1848.9 | 1847.1 | 1854.3 | 1854.3 | 1854.3 | 1858.4 | 1858.3 | 1858.3 |
| gdb 1263 | 1864.2 <sup>a</sup> | 1851.7 | 1837.4 | 1849.9 | 1864.3 | 1856.6 | 1849.1 | 1863.3 | 1863.3 | 1863.3 | 1859.4 | 1859.3 | 1859.3 |
| gdb 1264 | 1876.1 <sup>a</sup> | 1868.7 | 1848.6 | 1865.9 | 1871.4 | 1867.6 | 1862.2 | 1871.0 | 1871.0 | 1871.0 | 1868.0 | 1868.0 | 1868.0 |
| gdb 1265 | 1891.8 <sup>a</sup> | 1873.2 | 1851.7 | 1869.6 | 1881.1 | 1872.5 | 1863.8 | 1869.5 | 1869.4 | 1869.4 | 1870.1 | 1870.0 | 1870.0 |
| gdb 1266 | 1884.4 <sup>a</sup> | 1883.7 | 1866.3 | 1878.0 | 1886.5 | 1878.3 | 1874.1 | 1878.9 | 1878.9 | 1878.9 | 1881.7 | 1881.7 | 1881.7 |
| gdb 1267 | 1829.6 <sup>a</sup> | 1821.7 | 1796.9 | 1814.2 | 1824.0 | 1821.5 | 1812.3 | 1820.3 | 1820.3 | 1820.3 | 1810.8 | 1810.7 | 1810.8 |
| gdb 1268 | 1838.2 <sup>a</sup> | 1835.5 | 1814.1 | 1825.7 | 1843.4 | 1833.7 | 1826.2 | 1830.5 | 1830.5 | 1830.5 | 1826.9 | 1826.9 | 1826.9 |
| gdb 1269 | 1839.4 <sup>a</sup> | 1836.3 | 1815.7 | 1827.8 | 1843.3 | 1836.0 | 1826.8 | 1833.3 | 1833.3 | 1833.3 | 1829.2 | 1829.2 | 1829.2 |
| gdb 1270 | 1883.7 <sup>a</sup> | 1878.3 | 1871.1 | 1876.2 | 1882.0 | 1880.9 | 1873.6 | 1881.0 | 1881.0 | 1881.0 | 1875.8 | 1875.8 | 1875.8 |
| gdb 1271 | 1889.3 <sup>a</sup> | 1873.9 | 1853.1 | 1870.0 | 1880.7 | 1871.5 | 1862.6 | 1867.9 | 1867.9 | 1867.9 | 1868.2 | 1868.2 | 1868.2 |
| gdb 1272 | 1876.5 <sup>a</sup> | 1869.5 | 1849.1 | 1865.8 | 1871.9 | 1868.4 | 1863.5 | 1871.9 | 1871.9 | 1871.9 | 1868.6 | 1868.5 | 1868.5 |
| gdb 1273 | 1885.3 <sup>a</sup> | 1885.0 | 1869.2 | 1880.4 | 1889.6 | 1881.6 | 1875.3 | 1881.1 | 1881.1 | 1881.1 | 1883.7 | 1883.6 | 1883.6 |
| gdb 1274 | 1883.6 <sup>a</sup> | 1878.2 | 1870.8 | 1875.0 | 1881.8 | 1881.0 | 1874.0 | 1881.2 | 1881.1 | 1881.1 | 1875.9 | 1875.9 | 1875.9 |
| gdb 1275 | 1850.5 <sup>a</sup> | 1846.7 | 1817.8 | 1836.5 | 1852.0 | 1839.4 | 1827.7 | 1834.7 | 1834.7 | 1834.7 | 1834.6 | 1834.5 | 1834.5 |
| gdb 1276 | 1822.3 <sup>a</sup> | 1819.3 | 1773.2 | 1798.8 | 1818.3 | 1800.6 | 1792.2 | 1802.7 | 1802.7 | 1802.7 | 1798.2 | 1798.2 | 1798.2 |
| gdb 1277 | 1833.4 <sup>a</sup> | 1830.0 | 1789.5 | 1811.4 | 1830.8 | 1812.3 | 1806.3 | 1810.1 | 1810.1 | 1810.1 | 1810.4 | 1810.4 | 1810.4 |
| gdb 1278 | 1835.3 <sup>a</sup> | 1830.7 | 1788.7 | 1811.3 | 1829.9 | 1812.3 | 1806.3 | 1812.0 | 1812.0 | 1812.0 | 1812.4 | 1812.4 | 1812.4 |
| gdb 1279 | 1845.9 <sup>a</sup> | 1847.4 | 1818.1 | 1836.7 | 1851.6 | 1837.9 | 1824.1 | 1830.6 | 1830.6 | 1830.6 | 1830.9 | 1830.8 | 1830.8 |
| gdb 1280 | 1849.0 <sup>a</sup> | 1848.6 | 1817.9 | 1836.4 | 1851.5 | 1839.0 | 1827.0 | 1833.4 | 1833.4 | 1833.4 | 1833.7 | 1833.7 | 1833.7 |
| gdb 1281 | 1913.4 <sup>a</sup> | 1916.3 | 1913.9 | 1915.9 | 1917.9 | 1917.0 | 1912.9 | 1918.6 | 1918.6 | 1918.6 | 1920.3 | 1920.3 | 1920.3 |
| gdb 1282 | 1860.5 <sup>a</sup> | 1856.4 | 1840.7 | 1852.1 | 1865.6 | 1857.4 | 1848.7 | 1861.5 | 1861.5 | 1861.5 | 1858.1 | 1858.1 | 1858.1 |
| gdb 1283 | 1882.9 <sup>a</sup> | 1882.0 | 1873.3 | 1876.4 | 1881.8 | 1880.8 | 1876.9 | 1881.1 | 1881.1 | 1881.1 | 1876.2 | 1876.2 | 1876.2 |
| gdb 1284 | 1910.2 <sup>a</sup> | 1917.3 | 1915.0 | 1917.5 | 1918.7 | 1917.9 | 1912.7 | 1918.2 | 1918.2 | 1918.2 | 1919.9 | 1919.9 | 1919.9 |
| gdb 1285 | 1882.9 <sup>a</sup> | 1883.2 | 1873.6 | 1876.6 | 1882.0 | 1881.3 | 1877.6 | 1881.8 | 1881.8 | 1881.8 | 1877.0 | 1876.9 | 1876.9 |
| gdb 1286 | 1922.7 <sup>a</sup> | 1913.0 | 1908.8 | 1914.9 | 1916.2 | 1913.2 | 1908.2 | 1916.6 | 1916.6 | 1916.6 | 1914.0 | 1913.9 | 1914.0 |
| gdb 1287 | 1914.3 <sup>a</sup> | 1918.0 | 1914.5 | 1916.1 | 1917.2 | 1916.3 | 1913.8 | 1918.6 | 1918.6 | 1918.6 | 1919.8 | 1919.8 | 1919.8 |
| gdb 1288 | 1854.4 <sup>a</sup> | 1863.7 | 1863.1 | 1860.1 | 1863.7 | 1857.9 | 1852.9 | 1852.7 | 1852.7 | 1852.7 | 1854.6 | 1854.5 | 1854.5 |
| gdb 1289 | 1845.0 <sup>a</sup> | 1842.5 | 1818.3 | 1834.8 | 1851.0 | 1837.5 | 1824.7 | 1830.3 | 1830.3 | 1830.3 | 1830.5 | 1830.5 | 1830.5 |
| gdb 1290 | 1829.9 <sup>a</sup> | 1825.7 | 1789.2 | 1809.5 | 1828.3 | 1809.7 | 1802.9 | 1806.8 | 1806.8 | 1806.8 | 1807.8 | 1807.7 | 1807.7 |
| gdb 1291 | 1836.7 <sup>a</sup> | 1833.9 | 1816.5 | 1825.8 | 1841.0 | 1833.3 | 1827.4 | 1829.6 | 1829.6 | 1829.6 | 1826.2 | 1826.2 | 1826.2 |
| gdb 1292 | 1887.7 <sup>a</sup> | 1871.5 | 1854.2 | 1869.8 | 1879.4 | 1870.3 | 1862.7 | 1865.3 | 1865.3 | 1865.3 | 1866.0 | 1866.0 | 1866.0 |
| gdb 1293 | 1882.9 <sup>a</sup> | 1882.9 | 1868.6 | 1878.2 | 1886.1 | 1878.1 | 1875.6 | 1877.9 | 1877.9 | 1877.9 | 1881.0 | 1881.0 | 1881.0 |
| gdb 1294 | 1853.0 <sup>a</sup> | 1836.5 | 1812.9 | 1832.9 | 1846.7 | 1833.1 | 1831.5 | 1841.0 | 1841.0 | 1841.0 | 1840.1 | 1840.0 | 1840.0 |
| gdb 1295 | 1870.0 <sup>a</sup> | 1853.5 | 1829.1 | 1845.7 | 1858.1 | 1845.8 | 1847.3 | 1851.7 | 1851.7 | 1851.7 | 1855.8 | 1855.8 | 1855.8 |
| gdb 1296 | 1860.0 <sup>a</sup> | 1850.1 | 1837.2 | 1847.1 | 1861.6 | 1853.7 | 1849.3 | 1859.2 | 1859.2 | 1859.2 | 1855.6 | 1855.5 | 1855.5 |
| gdb 1297 | 1871.6 <sup>a</sup> | 1863.8 | 1849.5 | 1863.8 | 1868.3 | 1864.6 | 1861.8 | 1868.5 | 1868.5 | 1868.5 | 1865.0 | 1865.0 | 1865.0 |
| gdb 1298 | 1884.8 <sup>a</sup> | 1880.8 | 1868.2 | 1877.0 | 1885.6 | 1878.7 | 1876.8 | 1880.0 | 1880.0 | 1880.0 | 1881.9 | 1881.9 | 1881.9 |
| gdb 1299 | 1880.1 <sup>a</sup> | 1873.7 | 1871.9 | 1874.0 | 1880.7 | 1879.2 | 1873.2 | 1878.5 | 1878.5 | 1878.5 | 1873.6 | 1873.6 | 1873.6 |
| gdb 1300 | 1910.1 <sup>a</sup> | 1910.1 | 1914.2 | 1914.5 | 1913.7 | 1918.1 | 1911.0 | 1917.6 | 1917.6 | 1917.6 | 1918.7 | 1918.7 | 1918.7 |
| gdb 1301 | 1922.3 <sup>a</sup> | 1905.5 | 1904.5 | 1910.5 | 1913.9 | 1911.4 | 1908.4 | 1916.1 | 1916.1 | 1916.1 | 1913.4 | 1913.3 | 1913.3 |
| gdb 1302 | 1911.6 <sup>a</sup> | 1908.5 | 1913.3 | 1913.8 | 1916.1 | 1914.5 | 1909.0 | 1915.6 | 1915.6 | 1915.6 | 1917.0 | 1917.0 | 1917.0 |
| gdb 1303 | 1854.4 <sup>a</sup> | 1866.3 | 1859.0 | 1862.0 | 1864.8 | 1858.4 | 1850.9 | 1852.2 | 1852.2 | 1852.2 | 1849.1 | 1849.1 | 1849.1 |
| gdb 1304 | 1856.6 <sup>a</sup> | 1863.4 | 1859.1 | 1860.4 | 1863.1 | 1858.0 | 1850.8 | 1854.9 | 1854.9 | 1854.9 | 1856.1 | 1856.0 | 1856.1 |

... continued on next page ...



Table S26: . . . continued from previous page. . . .

| Molecule | Ref.                | MNDO   | AMI    | PM3    | PM6    | PM7    | OM1    | OM2    |        | OM3    |        | D3T    |
|----------|---------------------|--------|--------|--------|--------|--------|--------|--------|--------|--------|--------|--------|
|          |                     |        |        |        |        |        |        | D2     | D3     | D2     | D3     |        |
| gdb 1305 | 1854.6 <sup>a</sup> | 1853.0 | 1847.6 | 1851.2 | 1854.3 | 1852.8 | 1843.7 | 1851.8 | 1851.8 | 1846.7 | 1846.6 | 1846.6 |
| gdb 1306 | 1853.7 <sup>a</sup> | 1855.8 | 1851.5 | 1850.9 | 1851.5 | 1849.6 | 1849.3 | 1850.5 | 1850.5 | 1845.2 | 1845.2 | 1845.2 |
| gdb 1307 | 1914.1 <sup>a</sup> | 1910.1 | 1911.9 | 1912.2 | 1914.2 | 1913.3 | 1911.4 | 1916.0 | 1916.0 | 1916.8 | 1916.8 | 1916.8 |
| gdb 1308 | 1852.0 <sup>a</sup> | 1866.1 | 1857.8 | 1860.2 | 1863.6 | 1855.2 | 1846.9 | 1849.9 | 1849.9 | 1846.8 | 1846.8 | 1846.8 |
| gdb 1309 | 1854.7 <sup>a</sup> | 1867.5 | 1861.7 | 1862.6 | 1865.2 | 1858.7 | 1848.6 | 1851.6 | 1851.6 | 1848.6 | 1848.6 | 1848.6 |
| gdb 1310 | 1881.5 <sup>a</sup> | 1890.9 | 1887.9 | 1888.3 | 1885.6 | 1884.1 | 1882.5 | 1888.0 | 1887.9 | 1889.3 | 1889.3 | 1889.3 |
| gdb 1311 | 1851.5 <sup>a</sup> | 1862.9 | 1856.2 | 1853.0 | 1854.9 | 1852.9 | 1848.1 | 1849.9 | 1849.8 | 1846.5 | 1846.5 | 1846.5 |
| gdb 1312 | 1876.6 <sup>a</sup> | 1889.9 | 1890.0 | 1886.7 | 1879.4 | 1879.9 | 1881.5 | 1880.7 | 1880.7 | 1883.7 | 1883.7 | 1883.7 |
| gdb 1313 | 1889.7 <sup>a</sup> | 1880.4 | 1884.8 | 1884.8 | 1888.9 | 1886.9 | 1883.3 | 1887.3 | 1887.3 | 1885.0 | 1884.9 | 1884.9 |
| gdb 1314 | 1878.0 <sup>a</sup> | 1880.3 | 1886.7 | 1883.2 | 1881.5 | 1880.9 | 1881.9 | 1881.9 | 1881.9 | 1882.7 | 1882.7 | 1882.7 |
| gdb 1315 | 1861.6 <sup>a</sup> | 1863.4 | 1865.5 | 1868.1 | 1862.9 | 1863.5 | 1865.8 | 1870.4 | 1870.4 | 1867.2 | 1867.2 | 1867.2 |
| gdb 1316 | 1873.5 <sup>a</sup> | 1874.0 | 1882.0 | 1880.1 | 1872.1 | 1873.5 | 1876.0 | 1877.4 | 1877.4 | 1878.6 | 1878.5 | 1878.5 |
| gdb 1317 | 1854.1 <sup>a</sup> | 1850.9 | 1848.6 | 1848.7 | 1851.4 | 1850.2 | 1845.5 | 1850.0 | 1850.0 | 1844.6 | 1844.6 | 1844.6 |
| gdb 1318 | 1853.3 <sup>a</sup> | 1854.1 | 1851.6 | 1850.2 | 1852.0 | 1850.6 | 1848.4 | 1849.0 | 1849.0 | 1844.5 | 1844.5 | 1844.5 |
| gdb 1319 | 1861.7 <sup>a</sup> | 1874.8 | 1871.1 | 1871.8 | 1866.0 | 1863.0 | 1867.6 | 1868.5 | 1868.5 | 1867.6 | 1867.6 | 1867.6 |
| gdb 1320 | 1873.8 <sup>a</sup> | 1887.5 | 1887.8 | 1884.6 | 1877.6 | 1875.4 | 1880.2 | 1878.5 | 1878.5 | 1881.2 | 1881.2 | 1881.2 |
| gdb 1321 | 1883.1 <sup>a</sup> | 1876.6 | 1880.0 | 1881.1 | 1879.2 | 1876.8 | 1875.3 | 1878.2 | 1878.2 | 1875.1 | 1875.1 | 1875.1 |
| gdb 1322 | 1864.5 <sup>a</sup> | 1867.2 | 1867.7 | 1870.2 | 1867.4 | 1867.1 | 1864.7 | 1871.3 | 1871.3 | 1868.9 | 1868.8 | 1868.8 |
| gdb 1323 | 1874.6 <sup>a</sup> | 1878.2 | 1884.8 | 1884.0 | 1878.8 | 1877.8 | 1877.0 | 1881.0 | 1881.0 | 1882.0 | 1882.0 | 1882.0 |
| gdb 1324 | 1889.9 <sup>a</sup> | 1890.1 | 1884.1 | 1891.9 | 1887.0 | 1890.1 | 1896.7 | 1897.7 | 1897.7 | 1899.3 | 1899.3 | 1899.3 |
| gdb 1325 | 1887.3 <sup>a</sup> | 1880.4 | 1883.3 | 1890.4 | 1886.1 | 1888.9 | 1894.0 | 1897.8 | 1897.8 | 1897.8 | 1897.8 | 1897.8 |
| gdb 1326 | 1896.1 <sup>a</sup> | 1892.8 | 1889.4 | 1895.5 | 1895.2 | 1897.2 | 1903.4 | 1905.7 | 1905.7 | 1906.9 | 1906.9 | 1906.9 |
| gdb 1327 | 1876.1 <sup>a</sup> | 1866.1 | 1876.9 | 1879.4 | 1870.1 | 1871.8 | 1870.3 | 1879.7 | 1879.6 | 1878.6 | 1878.6 | 1878.6 |
| gdb 1328 | 1875.0 <sup>a</sup> | 1866.7 | 1875.4 | 1878.9 | 1873.8 | 1874.9 | 1874.5 | 1884.6 | 1884.6 | 1882.6 | 1882.6 | 1882.6 |
| gdb 1329 | 1893.3 <sup>a</sup> | 1886.8 | 1887.0 | 1893.9 | 1888.9 | 1890.8 | 1896.8 | 1899.1 | 1899.1 | 1900.3 | 1900.3 | 1900.3 |
| gdb 1330 | 1854.0 <sup>a</sup> | 1838.6 | 1815.6 | 1834.3 | 1846.5 | 1836.0 | 1835.2 | 1843.5 | 1843.5 | 1842.1 | 1842.1 | 1842.1 |
| gdb 1331 | 1861.8 <sup>a</sup> | 1854.8 | 1831.2 | 1846.4 | 1851.0 | 1842.0 | 1847.1 | 1849.2 | 1849.2 | 1852.0 | 1852.0 | 1852.0 |
| gdb 1332 | 1865.3 <sup>a</sup> | 1866.4 | 1849.4 | 1861.9 | 1867.9 | 1862.7 | 1855.4 | 1857.0 | 1857.0 | 1857.7 | 1857.7 | 1857.7 |
| gdb 1333 | 1861.5 <sup>a</sup> | 1865.7 | 1849.8 | 1861.7 | 1865.8 | 1860.0 | 1853.3 | 1854.6 | 1854.6 | 1855.3 | 1855.3 | 1855.3 |
| gdb 1334 | 1870.2 <sup>a</sup> | 1868.9 | 1852.1 | 1865.3 | 1867.5 | 1866.8 | 1864.2 | 1867.5 | 1867.5 | 1863.8 | 1863.8 | 1863.8 |
| gdb 1335 | 1872.2 <sup>a</sup> | 1882.8 | 1867.6 | 1876.0 | 1877.2 | 1873.3 | 1873.7 | 1872.4 | 1872.4 | 1873.9 | 1873.8 | 1873.8 |
| gdb 1336 | 1891.4 <sup>a</sup> | 1902.4 | 1901.6 | 1902.6 | 1899.0 | 1898.6 | 1896.1 | 1900.2 | 1900.2 | 1898.6 | 1898.6 | 1898.6 |
| gdb 1337 | 1900.6 <sup>a</sup> | 1915.4 | 1913.0 | 1912.1 | 1905.1 | 1907.2 | 1909.8 | 1907.8 | 1907.8 | 1909.1 | 1909.1 | 1909.1 |
| gdb 1338 | 1850.4 <sup>a</sup> | 1835.3 | 1816.4 | 1831.8 | 1842.9 | 1833.3 | 1834.8 | 1840.1 | 1840.1 | 1839.3 | 1839.3 | 1839.3 |
| gdb 1339 | 1858.7 <sup>a</sup> | 1849.9 | 1829.6 | 1843.6 | 1848.2 | 1839.7 | 1845.7 | 1846.6 | 1846.6 | 1849.9 | 1849.9 | 1849.9 |
| gdb 1340 | 1861.4 <sup>a</sup> | 1864.6 | 1851.4 | 1861.8 | 1865.6 | 1860.0 | 1854.7 | 1853.6 | 1853.6 | 1854.5 | 1854.5 | 1854.5 |
| gdb 1341 | 1870.6 <sup>a</sup> | 1881.5 | 1868.9 | 1875.5 | 1876.7 | 1872.9 | 1874.7 | 1871.4 | 1871.4 | 1873.4 | 1873.4 | 1873.4 |
| gdb 1342 | 1897.9 <sup>a</sup> | 1906.3 | 1900.7 | 1910.6 | 1907.0 | 1905.3 | 1902.9 | 1905.1 | 1905.1 | 1908.2 | 1908.2 | 1908.2 |
| gdb 1343 | 1891.9 <sup>a</sup> | 1892.3 | 1890.5 | 1896.3 | 1889.3 | 1891.1 | 1899.1 | 1897.7 | 1897.7 | 1900.6 | 1900.6 | 1900.6 |
| gdb 1344 | 1867.2 <sup>a</sup> | 1864.0 | 1853.3 | 1864.2 | 1865.4 | 1864.4 | 1863.5 | 1865.5 | 1865.5 | 1862.0 | 1861.9 | 1861.9 |
| gdb 1345 | 1864.8 <sup>a</sup> | 1862.5 | 1850.1 | 1860.6 | 1867.3 | 1862.1 | 1857.4 | 1857.5 | 1857.5 | 1857.9 | 1857.9 | 1857.9 |
| gdb 1346 | 1871.2 <sup>a</sup> | 1878.6 | 1868.3 | 1874.5 | 1876.5 | 1872.6 | 1874.1 | 1872.4 | 1872.4 | 1874.0 | 1873.9 | 1873.9 |
| gdb 1347 | 1899.3 <sup>a</sup> | 1906.0 | 1909.6 | 1906.8 | 1902.7 | 1903.1 | 1906.3 | 1904.8 | 1904.7 | 1906.0 | 1906.0 | 1906.0 |
| gdb 1348 | 1897.8 <sup>a</sup> | 1906.7 | 1900.3 | 1909.5 | 1905.2 | 1904.4 | 1903.8 | 1904.8 | 1904.8 | 1907.5 | 1907.5 | 1907.5 |
| gdb 1349 | 1893.7 <sup>a</sup> | 1896.2 | 1898.0 | 1898.5 | 1898.4 | 1898.5 | 1898.2 | 1901.7 | 1901.6 | 1899.9 | 1899.8 | 1899.8 |

. . . continued on next page . . .

Table S26: . . . continued from previous page. . . .

| Molecule | Ref.                | MNDO   | AMI    | PM3    | PM6    | PM7    | OM1    | OM2    |        | OM3    |        | OM3    | D3T    |
|----------|---------------------|--------|--------|--------|--------|--------|--------|--------|--------|--------|--------|--------|--------|
|          |                     |        |        |        |        |        |        | D2     | D3     | D2     | D3     |        |        |
| gdb 1350 | 1899.0 <sup>a</sup> | 1906.9 | 1909.1 | 1907.3 | 1902.0 | 1902.4 | 1906.3 | 1904.7 | 1904.7 | 1904.7 | 1905.8 | 1905.8 | 1905.8 |
| gdb 1351 | 1875.3 <sup>a</sup> | 1872.2 | 1882.1 | 1879.0 | 1873.2 | 1874.0 | 1877.2 | 1878.7 | 1878.7 | 1878.7 | 1879.0 | 1879.0 | 1879.0 |
| gdb 1352 | 1873.3 <sup>a</sup> | 1872.0 | 1881.7 | 1880.1 | 1870.7 | 1872.2 | 1874.8 | 1876.6 | 1876.5 | 1876.5 | 1876.9 | 1876.9 | 1876.9 |
| gdb 1353 | 1855.4 <sup>a</sup> | 1851.1 | 1848.3 | 1849.5 | 1850.9 | 1849.6 | 1847.3 | 1851.4 | 1851.4 | 1851.4 | 1845.8 | 1845.8 | 1845.8 |
| gdb 1354 | 1858.5 <sup>a</sup> | 1862.1 | 1861.9 | 1860.6 | 1864.4 | 1859.5 | 1856.5 | 1857.6 | 1857.6 | 1857.6 | 1858.6 | 1858.6 | 1858.6 |
| gdb 1355 | 1856.1 <sup>a</sup> | 1855.9 | 1852.1 | 1851.8 | 1853.4 | 1851.5 | 1851.3 | 1852.0 | 1852.0 | 1852.0 | 1847.2 | 1847.2 | 1847.2 |
| gdb 1356 | 1852.4 <sup>a</sup> | 1864.2 | 1865.2 | 1862.1 | 1864.4 | 1858.6 | 1855.7 | 1853.1 | 1853.0 | 1853.0 | 1855.1 | 1855.1 | 1855.1 |
| gdb 1357 | 1850.0 <sup>a</sup> | 1866.2 | 1861.4 | 1860.9 | 1863.4 | 1854.9 | 1849.2 | 1847.7 | 1847.6 | 1847.6 | 1844.4 | 1844.4 | 1844.4 |
| gdb 1358 | 1849.6 <sup>a</sup> | 1866.1 | 1860.4 | 1858.3 | 1859.4 | 1852.9 | 1847.6 | 1845.3 | 1845.3 | 1845.3 | 1843.0 | 1843.0 | 1843.0 |
| gdb 1359 | 1879.7 <sup>a</sup> | 1878.7 | 1886.8 | 1886.2 | 1886.5 | 1884.7 | 1878.8 | 1883.8 | 1883.7 | 1883.8 | 1885.6 | 1885.6 | 1885.6 |
| gdb 1360 | 1885.4 <sup>a</sup> | 1874.6 | 1881.2 | 1885.2 | 1885.2 | 1881.6 | 1877.0 | 1883.5 | 1883.5 | 1883.5 | 1880.3 | 1880.3 | 1880.3 |
| gdb 1361 | 1853.3 <sup>a</sup> | 1852.3 | 1854.2 | 1848.3 | 1852.3 | 1850.7 | 1851.0 | 1850.2 | 1850.2 | 1850.2 | 1845.6 | 1845.6 | 1845.6 |
| gdb 1362 | 1871.6 <sup>a</sup> | 1874.3 | 1881.1 | 1879.5 | 1871.4 | 1872.2 | 1877.8 | 1878.1 | 1878.1 | 1878.1 | 1878.4 | 1878.4 | 1878.4 |
| gdb 1363 | 1872.8 <sup>a</sup> | 1874.2 | 1882.0 | 1880.5 | 1870.7 | 1872.2 | 1875.0 | 1876.9 | 1876.8 | 1876.8 | 1877.5 | 1877.4 | 1877.4 |
| gdb 1364 | 1865.0 <sup>a</sup> | 1863.7 | 1867.4 | 1868.8 | 1863.7 | 1864.7 | 1867.0 | 1872.2 | 1872.2 | 1872.2 | 1869.1 | 1869.1 | 1869.1 |
| gdb 1365 | 1851.0 <sup>a</sup> | 1850.8 | 1846.2 | 1849.3 | 1849.6 | 1847.5 | 1844.7 | 1848.6 | 1848.6 | 1848.6 | 1843.3 | 1843.3 | 1843.3 |
| gdb 1366 | 1854.5 <sup>a</sup> | 1861.6 | 1860.5 | 1859.8 | 1862.8 | 1858.3 | 1855.3 | 1856.3 | 1856.3 | 1856.3 | 1857.1 | 1857.1 | 1857.1 |
| gdb 1367 | 1844.4 <sup>a</sup> | 1853.9 | 1846.6 | 1847.6 | 1851.6 | 1845.6 | 1846.2 | 1845.2 | 1845.2 | 1845.2 | 1843.9 | 1843.9 | 1843.9 |
| gdb 1368 | 1852.0 <sup>a</sup> | 1855.1 | 1852.2 | 1852.0 | 1853.4 | 1850.9 | 1849.4 | 1851.0 | 1851.0 | 1851.0 | 1846.4 | 1846.4 | 1846.4 |
| gdb 1369 | 1851.9 <sup>a</sup> | 1864.2 | 1860.5 | 1860.1 | 1860.0 | 1854.2 | 1856.0 | 1851.9 | 1851.9 | 1851.9 | 1853.6 | 1853.6 | 1853.6 |
| gdb 1370 | 1841.1 <sup>a</sup> | 1857.2 | 1847.2 | 1849.1 | 1851.3 | 1845.0 | 1839.0 | 1841.5 | 1841.5 | 1841.5 | 1835.0 | 1835.0 | 1835.0 |
| gdb 1371 | 1850.8 <sup>a</sup> | 1867.2 | 1860.1 | 1859.7 | 1861.9 | 1855.0 | 1851.6 | 1850.0 | 1850.0 | 1850.0 | 1847.0 | 1847.0 | 1847.0 |
| gdb 1372 | 1847.3 <sup>a</sup> | 1867.2 | 1860.3 | 1859.2 | 1860.8 | 1852.2 | 1848.7 | 1846.7 | 1846.7 | 1846.7 | 1844.0 | 1844.0 | 1844.0 |
| gdb 1373 | 1873.8 <sup>a</sup> | 1872.8 | 1883.6 | 1881.7 | 1875.3 | 1875.6 | 1875.1 | 1877.7 | 1877.7 | 1877.7 | 1879.1 | 1879.1 | 1879.1 |
| gdb 1374 | 1872.6 <sup>a</sup> | 1871.3 | 1881.6 | 1880.0 | 1872.5 | 1872.9 | 1873.9 | 1877.0 | 1877.0 | 1877.0 | 1877.4 | 1877.4 | 1877.4 |
| gdb 1375 | 1886.9 <sup>a</sup> | 1872.3 | 1883.8 | 1882.3 | 1882.3 | 1880.8 | 1877.5 | 1881.7 | 1881.7 | 1881.7 | 1877.9 | 1877.9 | 1877.9 |
| gdb 1376 | 1881.1 <sup>a</sup> | 1879.9 | 1887.3 | 1886.2 | 1881.7 | 1881.8 | 1879.5 | 1883.5 | 1883.5 | 1883.5 | 1884.8 | 1884.7 | 1884.7 |
| gdb 1377 | 1866.3 <sup>a</sup> | 1866.3 | 1868.5 | 1870.7 | 1872.3 | 1869.6 | 1867.7 | 1874.1 | 1874.1 | 1874.1 | 1871.6 | 1871.6 | 1871.6 |
| gdb 1378 | 1839.1 <sup>a</sup> | 1840.2 | 1836.0 | 1835.3 | 1837.5 | 1835.6 | 1836.9 | 1838.1 | 1838.1 | 1838.1 | 1830.0 | 1830.0 | 1830.0 |
| gdb 1379 | 1851.7 <sup>a</sup> | 1853.6 | 1853.3 | 1848.7 | 1848.9 | 1847.6 | 1850.4 | 1848.7 | 1848.7 | 1848.7 | 1844.1 | 1844.1 | 1844.1 |
| gdb 1380 | 1860.9 <sup>a</sup> | 1865.0 | 1869.9 | 1868.8 | 1866.7 | 1863.2 | 1866.7 | 1866.3 | 1866.2 | 1866.2 | 1865.0 | 1864.9 | 1864.9 |
| gdb 1381 | 1885.3 <sup>a</sup> | 1875.8 | 1888.2 | 1884.6 | 1883.9 | 1881.1 | 1879.8 | 1880.1 | 1879.8 | 1879.8 | 1877.3 | 1877.3 | 1877.3 |
| gdb 1382 | 1872.4 <sup>a</sup> | 1875.6 | 1886.7 | 1882.1 | 1875.5 | 1875.3 | 1876.1 | 1874.8 | 1874.8 | 1874.8 | 1877.3 | 1877.3 | 1877.3 |
| gdb 1383 | 1877.3 <sup>a</sup> | 1879.0 | 1885.8 | 1885.1 | 1883.4 | 1882.0 | 1878.8 | 1884.0 | 1884.0 | 1884.0 | 1885.2 | 1885.2 | 1885.2 |
| gdb 1384 | 1889.6 <sup>a</sup> | 1880.6 | 1886.3 | 1885.0 | 1888.1 | 1885.8 | 1881.9 | 1886.4 | 1886.2 | 1886.2 | 1883.9 | 1883.6 | 1883.6 |
| gdb 1385 | 1868.7 <sup>a</sup> | 1868.3 | 1870.3 | 1871.5 | 1871.7 | 1871.2 | 1869.1 | 1876.9 | 1876.9 | 1876.9 | 1874.1 | 1874.1 | 1874.1 |
| gdb 1386 | 1840.2 <sup>a</sup> | 1841.4 | 1837.4 | 1835.9 | 1841.1 | 1836.5 | 1838.3 | 1840.5 | 1840.5 | 1840.5 | 1831.9 | 1831.9 | 1831.9 |
| gdb 1387 | 1848.2 <sup>a</sup> | 1852.5 | 1852.4 | 1849.1 | 1849.2 | 1846.9 | 1848.2 | 1847.7 | 1847.7 | 1847.7 | 1843.3 | 1843.3 | 1843.3 |
| gdb 1388 | 1843.1 <sup>a</sup> | 1853.0 | 1848.3 | 1845.1 | 1848.2 | 1843.9 | 1847.4 | 1844.2 | 1844.2 | 1844.2 | 1842.0 | 1842.0 | 1842.0 |
| gdb 1389 | 1862.9 <sup>a</sup> | 1865.7 | 1871.7 | 1869.8 | 1865.9 | 1864.4 | 1867.3 | 1867.6 | 1867.6 | 1867.6 | 1866.2 | 1866.2 | 1866.2 |
| gdb 1390 | 1884.5 <sup>a</sup> | 1875.5 | 1888.7 | 1883.9 | 1881.9 | 1878.9 | 1878.0 | 1877.5 | 1877.5 | 1877.5 | 1874.7 | 1874.7 | 1874.7 |
| gdb 1391 | 1873.0 <sup>a</sup> | 1876.9 | 1885.9 | 1881.4 | 1873.3 | 1874.0 | 1877.8 | 1875.3 | 1875.3 | 1875.3 | 1877.7 | 1877.7 | 1877.7 |
| gdb 1392 | 1859.4 <sup>a</sup> | 1866.0 | 1870.3 | 1867.6 | 1859.3 | 1859.6 | 1865.7 | 1864.2 | 1864.2 | 1864.2 | 1862.3 | 1862.2 | 1862.2 |
| gdb 1393 | 1863.8 <sup>a</sup> | 1867.2 | 1872.3 | 1869.8 | 1863.4 | 1864.0 | 1867.7 | 1868.3 | 1868.3 | 1868.3 | 1866.4 | 1866.4 | 1866.4 |
| gdb 1394 | 1870.5 <sup>a</sup> | 1877.6 | 1885.5 | 1881.6 | 1871.4 | 1872.1 | 1876.8 | 1874.5 | 1874.5 | 1874.5 | 1876.3 | 1876.3 | 1876.3 |

. . . continued on next page . . .

Table S26: ... continued from previous page. ...

| Molecule | Ref.                | MNDO   | AMI    | PM3    | PM6    | PM7    | OM1    |        | OM2    |        | OM3    |        | D3T    |
|----------|---------------------|--------|--------|--------|--------|--------|--------|--------|--------|--------|--------|--------|--------|
|          |                     |        |        |        |        |        | D2     | D3     | D2     | D3     | D2     | D3     |        |
| gdb 1395 | 1883.2 <sup>a</sup> | 1876.2 | 1888.3 | 1884.1 | 1881.2 | 1878.6 | 1876.3 | 1877.6 | 1877.6 | 1874.9 | 1874.4 | 1874.4 | 1874.4 |
| gdb 1396 | 1860.8 <sup>a</sup> | 1866.1 | 1871.6 | 1868.7 | 1861.1 | 1861.2 | 1864.8 | 1865.9 | 1865.9 | 1864.0 | 1863.9 | 1863.9 | 1863.9 |
| gdb 1397 | 1862.3 <sup>a</sup> | 1866.3 | 1870.8 | 1869.3 | 1864.5 | 1863.1 | 1868.2 | 1868.9 | 1868.9 | 1867.0 | 1867.0 | 1867.0 | 1867.0 |
| gdb 1398 | 1869.3 <sup>a</sup> | 1877.1 | 1885.3 | 1882.1 | 1872.5 | 1872.7 | 1876.2 | 1875.0 | 1875.0 | 1877.1 | 1877.1 | 1877.1 | 1877.1 |
| gdb 1399 | 1880.1 <sup>a</sup> | 1883.4 | 1861.9 | 1879.6 | 1884.8 | 1880.2 | 1873.7 | 1883.0 | 1883.0 | 1879.2 | 1879.2 | 1879.2 | 1879.2 |
| gdb 1400 | 1897.7 <sup>a</sup> | 1888.8 | 1863.9 | 1884.6 | 1894.9 | 1886.2 | 1877.7 | 1884.6 | 1884.6 | 1884.0 | 1884.0 | 1884.0 | 1884.0 |
| gdb 1401 | 1883.3 <sup>a</sup> | 1895.2 | 1873.6 | 1889.2 | 1896.1 | 1888.9 | 1884.3 | 1890.9 | 1890.9 | 1892.0 | 1891.9 | 1891.9 | 1891.9 |
| gdb 1402 | 1924.1 <sup>a</sup> | 1921.9 | 1922.7 | 1930.3 | 1929.8 | 1931.1 | 1927.8 | 1939.1 | 1939.1 | 1940.6 | 1940.6 | 1940.6 | 1940.6 |
| gdb 1403 | 1863.1 <sup>a</sup> | 1865.4 | 1858.9 | 1864.4 | 1865.9 | 1861.4 | 1850.0 | 1856.1 | 1856.1 | 1857.4 | 1857.3 | 1857.3 | 1857.3 |
| gdb 1404 | 1894.8 <sup>a</sup> | 1892.3 | 1888.9 | 1898.1 | 1893.1 | 1892.4 | 1895.7 | 1899.4 | 1899.4 | 1901.9 | 1901.9 | 1901.9 | 1901.9 |
| gdb 1405 | 1900.7 <sup>a</sup> | 1904.5 | 1897.8 | 1911.0 | 1907.4 | 1905.4 | 1902.2 | 1909.7 | 1909.7 | 1911.6 | 1911.6 | 1911.6 | 1911.6 |
| gdb 1406 | 1884.3 <sup>a</sup> | 1882.4 | 1863.5 | 1880.2 | 1886.9 | 1877.0 | 1867.3 | 1876.6 | 1876.6 | 1879.7 | 1879.7 | 1879.7 | 1879.7 |
| gdb 1407 | 1895.3 <sup>a</sup> | 1873.3 | 1852.3 | 1873.1 | 1886.5 | 1875.9 | 1861.3 | 1871.3 | 1871.3 | 1871.3 | 1871.3 | 1871.3 | 1871.3 |
| gdb 1408 | 1885.7 <sup>a</sup> | 1883.4 | 1864.6 | 1880.8 | 1890.1 | 1880.7 | 1869.6 | 1878.7 | 1878.7 | 1882.0 | 1882.0 | 1882.0 | 1882.0 |
| gdb 1409 | 1857.3 <sup>a</sup> | 1843.8 | 1827.9 | 1840.2 | 1861.1 | 1849.5 | 1839.8 | 1851.1 | 1851.1 | 1848.9 | 1848.9 | 1848.9 | 1848.9 |
| gdb 1410 | 1842.5 <sup>a</sup> | 1853.1 | 1830.0 | 1843.8 | 1859.9 | 1846.7 | 1830.4 | 1834.4 | 1834.4 | 1833.2 | 1833.2 | 1833.2 | 1833.2 |
| gdb 1411 | 1865.5 <sup>a</sup> | 1861.5 | 1832.1 | 1852.9 | 1862.4 | 1850.4 | 1845.6 | 1853.8 | 1853.8 | 1854.5 | 1854.5 | 1854.5 | 1854.5 |
| gdb 1412 | 1854.5 <sup>a</sup> | 1845.3 | 1812.8 | 1837.1 | 1854.7 | 1841.7 | 1828.0 | 1839.7 | 1839.7 | 1838.9 | 1838.9 | 1838.9 | 1838.9 |
| gdb 1413 | 1886.8 <sup>a</sup> | 1869.0 | 1864.2 | 1873.5 | 1886.8 | 1876.7 | 1861.3 | 1880.4 | 1880.4 | 1872.5 | 1872.5 | 1872.5 | 1872.5 |
| gdb 1414 | 1895.7 <sup>a</sup> | 1877.6 | 1873.0 | 1881.2 | 1893.0 | 1885.7 | 1875.4 | 1888.3 | 1888.3 | 1885.8 | 1885.7 | 1885.7 | 1885.7 |
| gdb 1415 | 1852.9 <sup>a</sup> | 1844.9 | 1801.6 | 1826.1 | 1841.7 | 1823.3 | 1820.8 | 1827.0 | 1827.0 | 1829.8 | 1829.8 | 1829.8 | 1829.8 |
| gdb 1416 | 1841.1 <sup>a</sup> | 1830.9 | 1785.2 | 1813.2 | 1834.5 | 1815.9 | 1806.5 | 1816.7 | 1816.7 | 1816.7 | 1816.7 | 1816.7 | 1816.7 |
| gdb 1417 | 1838.0 <sup>a</sup> | 1831.2 | 1786.3 | 1813.7 | 1829.2 | 1809.6 | 1804.3 | 1814.3 | 1814.3 | 1813.3 | 1813.3 | 1813.3 | 1813.3 |
| gdb 1418 | 1851.4 <sup>a</sup> | 1845.2 | 1799.5 | 1824.7 | 1838.1 | 1820.3 | 1820.4 | 1826.6 | 1826.6 | 1829.2 | 1829.2 | 1829.2 | 1829.2 |
| gdb 1419 | 1839.1 <sup>a</sup> | 1831.5 | 1786.0 | 1813.4 | 1832.5 | 1814.3 | 1806.3 | 1815.6 | 1815.6 | 1815.2 | 1815.2 | 1815.2 | 1815.2 |
| gdb 1420 | 1834.1 <sup>a</sup> | 1843.7 | 1819.9 | 1835.3 | 1848.7 | 1836.1 | 1823.4 | 1826.9 | 1826.9 | 1830.9 | 1830.9 | 1830.9 | 1830.9 |
| gdb 1421 | 1838.2 <sup>a</sup> | 1835.4 | 1810.7 | 1827.1 | 1845.7 | 1836.7 | 1822.7 | 1830.5 | 1830.5 | 1827.4 | 1827.4 | 1827.4 | 1827.4 |
| gdb 1422 | 1832.2 <sup>a</sup> | 1831.9 | 1809.1 | 1825.2 | 1838.2 | 1829.4 | 1818.9 | 1825.9 | 1825.9 | 1822.7 | 1822.7 | 1822.7 | 1822.7 |
| gdb 1423 | 1835.7 <sup>a</sup> | 1843.9 | 1822.0 | 1835.5 | 1850.0 | 1838.0 | 1824.9 | 1828.7 | 1828.7 | 1831.7 | 1831.7 | 1831.7 | 1831.7 |
| gdb 1424 | 1835.1 <sup>a</sup> | 1832.7 | 1810.5 | 1825.5 | 1843.4 | 1834.6 | 1821.1 | 1828.9 | 1828.9 | 1825.2 | 1825.2 | 1825.2 | 1825.2 |
| gdb 1425 | 1875.6 <sup>a</sup> | 1874.0 | 1859.0 | 1867.8 | 1879.3 | 1869.7 | 1863.2 | 1873.4 | 1873.4 | 1870.1 | 1870.1 | 1870.1 | 1870.1 |
| gdb 1426 | 1877.7 <sup>a</sup> | 1872.6 | 1860.5 | 1869.2 | 1882.7 | 1872.6 | 1862.2 | 1871.7 | 1871.7 | 1869.5 | 1869.5 | 1869.5 | 1869.5 |
| gdb 1427 | 1865.8 <sup>a</sup> | 1852.9 | 1825.4 | 1842.2 | 1858.2 | 1843.8 | 1839.0 | 1849.8 | 1849.8 | 1848.6 | 1848.6 | 1848.6 | 1848.6 |
| gdb 1428 | 1886.1 <sup>a</sup> | 1892.3 | 1879.7 | 1886.2 | 1889.2 | 1885.1 | 1878.7 | 1882.2 | 1882.2 | 1885.1 | 1885.1 | 1885.1 | 1885.1 |
| gdb 1429 | 1882.7 <sup>a</sup> | 1883.5 | 1863.0 | 1879.9 | 1882.6 | 1874.5 | 1868.7 | 1876.1 | 1876.1 | 1879.6 | 1879.6 | 1879.6 | 1879.6 |
| gdb 1430 | 1892.4 <sup>a</sup> | 1874.3 | 1853.3 | 1873.0 | 1884.2 | 1873.8 | 1860.4 | 1869.8 | 1869.8 | 1869.3 | 1869.3 | 1869.3 | 1869.3 |
| gdb 1431 | 1885.2 <sup>a</sup> | 1884.0 | 1864.0 | 1880.2 | 1887.7 | 1879.7 | 1870.3 | 1878.1 | 1878.1 | 1881.3 | 1881.3 | 1881.3 | 1881.3 |
| gdb 1432 | 1910.8 <sup>a</sup> | 1901.7 | 1895.8 | 1905.8 | 1911.8 | 1904.9 | 1897.2 | 1906.0 | 1906.0 | 1904.2 | 1904.2 | 1904.2 | 1904.2 |
| gdb 1433 | 1900.8 <sup>a</sup> | 1905.6 | 1900.6 | 1906.8 | 1912.3 | 1907.6 | 1899.3 | 1907.1 | 1907.1 | 1910.4 | 1910.4 | 1910.4 | 1910.4 |
| gdb 1434 | 1888.0 <sup>a</sup> | 1870.9 | 1859.5 | 1876.2 | 1884.7 | 1878.6 | 1871.0 | 1887.2 | 1887.2 | 1883.3 | 1883.3 | 1883.3 | 1883.3 |
| gdb 1435 | 1898.7 <sup>a</sup> | 1885.5 | 1875.4 | 1889.4 | 1892.2 | 1888.4 | 1885.4 | 1897.0 | 1897.0 | 1896.9 | 1896.9 | 1896.9 | 1896.9 |
| gdb 1436 | 1865.7 <sup>a</sup> | 1863.1 | 1848.2 | 1863.3 | 1867.0 | 1860.9 | 1851.8 | 1856.1 | 1856.1 | 1856.1 | 1856.1 | 1856.1 | 1856.1 |
| gdb 1437 | 1873.6 <sup>a</sup> | 1878.9 | 1865.3 | 1877.6 | 1878.4 | 1873.5 | 1868.9 | 1870.3 | 1870.3 | 1873.5 | 1873.5 | 1873.5 | 1873.5 |
| gdb 1438 | 1849.8 <sup>a</sup> | 1833.6 | 1809.8 | 1832.6 | 1843.9 | 1830.6 | 1831.3 | 1844.2 | 1844.2 | 1839.1 | 1839.1 | 1839.1 | 1839.1 |
| gdb 1439 | 1866.5 <sup>a</sup> | 1852.6 | 1828.5 | 1847.8 | 1854.6 | 1845.6 | 1846.8 | 1854.8 | 1854.8 | 1856.6 | 1856.6 | 1856.6 | 1856.6 |

... continued on next page ...

Table S26: ... continued from previous page. ...

| Molecule | Ref.                | MNDO   | AMI    | PM3    | PM6    | PM7    | OM1    | OM2    |        | OM3    |        | D3T    | OM3    | D3     | D3T    |
|----------|---------------------|--------|--------|--------|--------|--------|--------|--------|--------|--------|--------|--------|--------|--------|--------|
|          |                     |        |        |        |        |        |        | D2     | D3     | D2     | D3     |        |        |        |        |
| gdb 1440 | 1781.5 <sup>a</sup> | 1754.4 | 1725.9 | 1750.1 | 1780.8 | 1760.8 | 1746.9 | 1762.3 | 1762.3 | 1762.3 | 1758.6 | 1762.3 | 1758.6 | 1758.6 | 1758.6 |
| gdb 1441 | 1805.4 <sup>a</sup> | 1786.1 | 1757.2 | 1778.1 | 1801.6 | 1784.4 | 1774.5 | 1785.4 | 1785.4 | 1785.4 | 1785.3 | 1785.4 | 1785.3 | 1785.3 | 1785.3 |
| gdb 1442 | 1805.4 <sup>a</sup> | 1786.2 | 1753.9 | 1776.4 | 1799.6 | 1782.8 | 1774.6 | 1786.6 | 1786.6 | 1786.6 | 1786.0 | 1786.6 | 1786.0 | 1786.0 | 1786.0 |
| gdb 1443 | 1817.5 <sup>a</sup> | 1803.4 | 1760.4 | 1772.4 | 1817.2 | 1801.4 | 1795.2 | 1809.1 | 1809.1 | 1809.1 | 1804.9 | 1809.1 | 1804.8 | 1804.8 | 1804.8 |
| gdb 1444 | 1888.4 <sup>a</sup> | 1870.4 | 1860.3 | 1875.8 | 1887.1 | 1879.9 | 1870.5 | 1887.7 | 1887.7 | 1887.7 | 1884.3 | 1887.7 | 1884.3 | 1884.3 | 1884.3 |
| gdb 1445 | 1903.3 <sup>a</sup> | 1874.0 | 1866.5 | 1882.9 | 1894.6 | 1885.8 | 1877.4 | 1894.4 | 1894.4 | 1894.4 | 1891.0 | 1894.4 | 1890.9 | 1890.9 | 1890.9 |
| gdb 1446 | 1898.1 <sup>a</sup> | 1883.5 | 1875.8 | 1888.7 | 1895.2 | 1890.2 | 1884.4 | 1897.2 | 1897.2 | 1897.2 | 1897.7 | 1897.2 | 1897.7 | 1897.7 | 1897.7 |
| gdb 1447 | 1850.9 <sup>a</sup> | 1828.0 | 1813.5 | 1828.6 | 1843.5 | 1836.6 | 1827.4 | 1844.5 | 1844.5 | 1844.5 | 1834.8 | 1844.5 | 1834.8 | 1834.8 | 1834.8 |
| gdb 1448 | 1864.3 <sup>a</sup> | 1837.8 | 1827.5 | 1843.3 | 1856.7 | 1849.6 | 1841.5 | 1855.9 | 1855.9 | 1855.9 | 1850.0 | 1855.9 | 1850.0 | 1850.0 | 1850.0 |
| gdb 1449 | 1854.6 <sup>a</sup> | 1835.8 | 1825.0 | 1836.1 | 1859.3 | 1847.2 | 1838.6 | 1854.4 | 1854.4 | 1854.4 | 1849.5 | 1854.4 | 1849.5 | 1849.5 | 1849.5 |
| gdb 1450 | 1824.6 <sup>a</sup> | 1809.3 | 1774.7 | 1798.5 | 1816.9 | 1804.0 | 1798.5 | 1811.8 | 1811.8 | 1811.8 | 1803.5 | 1811.8 | 1803.5 | 1803.5 | 1803.5 |
| gdb 1451 | 1841.2 <sup>a</sup> | 1825.2 | 1790.0 | 1811.6 | 1828.5 | 1816.9 | 1813.9 | 1821.9 | 1821.9 | 1821.9 | 1819.2 | 1821.9 | 1819.2 | 1819.2 | 1819.2 |
| gdb 1452 | 1830.6 <sup>a</sup> | 1824.5 | 1788.1 | 1809.3 | 1833.1 | 1816.7 | 1813.0 | 1822.5 | 1822.5 | 1822.5 | 1820.1 | 1822.5 | 1820.1 | 1820.1 | 1820.1 |
| gdb 1453 | 1845.1 <sup>a</sup> | 1828.9 | 1812.0 | 1828.9 | 1843.8 | 1831.8 | 1829.5 | 1840.9 | 1840.9 | 1840.9 | 1839.2 | 1840.9 | 1839.2 | 1839.2 | 1839.2 |
| gdb 1454 | 1863.8 <sup>a</sup> | 1848.2 | 1827.7 | 1844.5 | 1854.3 | 1845.5 | 1847.7 | 1853.6 | 1853.6 | 1853.6 | 1856.1 | 1853.6 | 1856.1 | 1856.1 | 1856.1 |
| gdb 1455 | 1885.3 <sup>a</sup> | 1881.8 | 1876.2 | 1880.5 | 1892.5 | 1887.0 | 1874.9 | 1885.2 | 1885.2 | 1885.2 | 1880.7 | 1885.2 | 1880.7 | 1880.7 | 1880.7 |
| gdb 1456 | 1849.3 <sup>a</sup> | 1839.9 | 1813.4 | 1832.5 | 1842.9 | 1838.5 | 1831.7 | 1841.6 | 1841.5 | 1841.5 | 1831.1 | 1841.5 | 1831.1 | 1831.1 | 1831.1 |
| gdb 1457 | 1853.1 <sup>a</sup> | 1853.8 | 1827.0 | 1843.8 | 1853.5 | 1846.9 | 1841.5 | 1848.5 | 1848.5 | 1848.5 | 1845.3 | 1848.5 | 1845.3 | 1845.3 | 1845.3 |
| gdb 1458 | 1853.1 <sup>a</sup> | 1852.0 | 1826.0 | 1843.2 | 1856.5 | 1849.0 | 1843.4 | 1850.4 | 1850.4 | 1850.4 | 1845.3 | 1850.4 | 1845.3 | 1845.3 | 1845.3 |
| gdb 1459 | 1868.9 <sup>a</sup> | 1861.1 | 1850.5 | 1864.7 | 1867.8 | 1865.3 | 1861.4 | 1869.5 | 1869.5 | 1869.5 | 1865.0 | 1869.5 | 1865.0 | 1865.0 | 1865.0 |
| gdb 1460 | 1877.0 <sup>a</sup> | 1877.3 | 1866.8 | 1877.7 | 1882.9 | 1878.4 | 1875.5 | 1880.5 | 1880.5 | 1880.5 | 1881.2 | 1880.5 | 1881.2 | 1881.2 | 1881.2 |
| gdb 1461 | 1868.8 <sup>a</sup> | 1853.8 | 1843.3 | 1852.7 | 1859.5 | 1859.9 | 1855.5 | 1865.3 | 1865.3 | 1865.3 | 1854.2 | 1865.3 | 1854.2 | 1854.2 | 1854.2 |
| gdb 1462 | 1875.8 <sup>a</sup> | 1867.1 | 1858.1 | 1864.5 | 1877.4 | 1872.6 | 1869.4 | 1877.4 | 1877.3 | 1877.3 | 1871.3 | 1877.3 | 1871.3 | 1871.3 | 1871.3 |
| gdb 1463 | 1910.9 <sup>a</sup> | 1897.3 | 1892.3 | 1903.3 | 1909.7 | 1903.9 | 1898.6 | 1909.6 | 1909.5 | 1909.5 | 1906.3 | 1909.5 | 1906.3 | 1906.3 | 1906.3 |
| gdb 1464 | 1902.0 <sup>a</sup> | 1889.4 | 1885.0 | 1893.8 | 1898.5 | 1898.6 | 1894.8 | 1905.6 | 1905.6 | 1905.6 | 1900.9 | 1905.6 | 1900.9 | 1900.9 | 1900.9 |
| gdb 1465 | 1902.8 <sup>a</sup> | 1901.9 | 1896.6 | 1903.1 | 1908.2 | 1905.0 | 1903.2 | 1911.2 | 1911.2 | 1911.2 | 1911.5 | 1911.2 | 1911.5 | 1911.5 | 1911.5 |
| gdb 1466 | 1854.6 <sup>a</sup> | 1856.4 | 1829.7 | 1845.0 | 1856.8 | 1848.4 | 1839.5 | 1843.7 | 1843.7 | 1843.7 | 1840.7 | 1843.7 | 1840.7 | 1840.7 | 1840.7 |
| gdb 1467 | 1846.5 <sup>a</sup> | 1850.5 | 1820.2 | 1839.2 | 1854.2 | 1843.0 | 1828.1 | 1829.9 | 1829.9 | 1829.9 | 1832.0 | 1829.9 | 1831.9 | 1831.9 | 1831.9 |
| gdb 1468 | 1859.1 <sup>a</sup> | 1843.2 | 1819.4 | 1838.3 | 1856.7 | 1844.7 | 1831.1 | 1848.8 | 1848.8 | 1848.8 | 1841.3 | 1848.8 | 1841.3 | 1841.3 | 1841.3 |
| gdb 1469 | 1869.3 <sup>a</sup> | 1854.7 | 1835.2 | 1852.2 | 1867.5 | 1855.8 | 1845.1 | 1858.5 | 1858.5 | 1858.5 | 1854.5 | 1858.5 | 1854.5 | 1854.5 | 1854.5 |
| gdb 1470 | 1861.4 <sup>a</sup> | 1873.4 | 1846.7 | 1864.7 | 1874.1 | 1863.0 | 1847.7 | 1856.1 | 1856.1 | 1856.1 | 1851.9 | 1856.1 | 1851.9 | 1851.9 | 1851.9 |
| gdb 1471 | 1869.3 <sup>a</sup> | 1856.1 | 1833.9 | 1851.4 | 1866.0 | 1854.8 | 1845.2 | 1857.9 | 1857.9 | 1857.9 | 1854.7 | 1857.9 | 1854.7 | 1854.7 | 1854.7 |
| gdb 1472 | 1866.1 <sup>a</sup> | 1855.8 | 1832.6 | 1849.7 | 1867.2 | 1855.4 | 1845.5 | 1859.5 | 1859.5 | 1859.5 | 1856.2 | 1859.5 | 1856.2 | 1856.2 | 1856.2 |
| gdb 1473 | 1876.7 <sup>a</sup> | 1872.5 | 1859.3 | 1866.8 | 1875.9 | 1871.0 | 1865.7 | 1869.6 | 1869.6 | 1869.6 | 1866.6 | 1869.6 | 1866.6 | 1866.6 | 1866.6 |
| gdb 1474 | 1860.0 <sup>a</sup> | 1865.4 | 1852.9 | 1861.2 | 1874.6 | 1864.7 | 1854.5 | 1859.9 | 1859.9 | 1859.9 | 1859.6 | 1859.9 | 1859.6 | 1859.6 | 1859.6 |
| gdb 1475 | 1887.4 <sup>a</sup> | 1892.9 | 1881.7 | 1887.6 | 1891.5 | 1886.7 | 1879.0 | 1881.0 | 1881.0 | 1881.0 | 1883.3 | 1881.0 | 1883.3 | 1883.3 | 1883.3 |
| gdb 1476 | 1912.7 <sup>a</sup> | 1901.5 | 1897.1 | 1905.0 | 1913.1 | 1904.8 | 1898.5 | 1907.4 | 1907.4 | 1907.4 | 1905.3 | 1907.4 | 1905.3 | 1905.3 | 1905.3 |
| gdb 1477 | 1891.4 <sup>a</sup> | 1892.5 | 1886.0 | 1894.1 | 1900.2 | 1894.3 | 1885.2 | 1895.6 | 1895.6 | 1895.6 | 1895.0 | 1895.6 | 1895.0 | 1895.0 | 1895.0 |
| gdb 1478 | 1902.0 <sup>a</sup> | 1906.0 | 1899.2 | 1905.7 | 1911.1 | 1906.0 | 1901.1 | 1906.3 | 1906.3 | 1906.3 | 1909.5 | 1906.3 | 1909.5 | 1909.4 | 1909.4 |
| gdb 1479 | 1867.8 <sup>a</sup> | 1865.2 | 1847.8 | 1862.9 | 1867.9 | 1861.6 | 1852.5 | 1858.5 | 1858.5 | 1858.5 | 1858.3 | 1858.5 | 1858.3 | 1858.3 | 1858.3 |
| gdb 1480 | 1868.4 <sup>a</sup> | 1866.1 | 1849.6 | 1864.3 | 1868.7 | 1861.5 | 1851.4 | 1856.8 | 1856.8 | 1856.8 | 1856.2 | 1856.8 | 1856.2 | 1856.2 | 1856.2 |
| gdb 1481 | 1877.8 <sup>a</sup> | 1883.0 | 1865.9 | 1878.5 | 1880.5 | 1875.4 | 1870.7 | 1873.3 | 1873.3 | 1873.3 | 1875.8 | 1873.3 | 1875.8 | 1875.8 | 1875.8 |
| gdb 1482 | 1882.1 <sup>a</sup> | 1866.9 | 1857.8 | 1872.2 | 1882.2 | 1873.8 | 1864.7 | 1880.3 | 1880.3 | 1880.3 | 1877.9 | 1880.3 | 1877.9 | 1877.9 | 1877.9 |
| gdb 1483 | 1896.4 <sup>a</sup> | 1884.2 | 1874.8 | 1888.3 | 1894.0 | 1887.8 | 1882.3 | 1893.2 | 1893.2 | 1893.2 | 1894.0 | 1893.2 | 1894.0 | 1893.9 | 1893.9 |
| gdb 1484 | 1889.8 <sup>a</sup> | 1876.2 | 1878.7 | 1881.4 | 1891.4 | 1888.3 | 1880.1 | 1894.5 | 1894.5 | 1894.5 | 1889.8 | 1894.5 | 1889.7 | 1889.7 | 1889.7 |

... continued on next page ...

Table S26: ... continued from previous page. ...

| Molecule | Ref.                | MNDO   | AMI    | PM3    | PM6    | PM7    | OM1    | OM2    |        |        | OM3    |        |        | D3T    |
|----------|---------------------|--------|--------|--------|--------|--------|--------|--------|--------|--------|--------|--------|--------|--------|
|          |                     |        |        |        |        |        |        | D2     | D3     | D3T    | D2     | D3     | D3T    |        |
| gdb 1485 | 1874.7 <sup>a</sup> | 1886.9 | 1866.3 | 1884.4 | 1887.0 | 1878.9 | 1867.2 | 1875.3 | 1875.3 | 1875.3 | 1872.9 | 1872.9 | 1872.9 | 1872.9 |
| gdb 1486 | 1879.0 <sup>a</sup> | 1888.8 | 1868.6 | 1885.3 | 1891.0 | 1882.7 | 1871.0 | 1878.7 | 1878.7 | 1878.7 | 1876.5 | 1876.5 | 1876.5 | 1876.5 |
| gdb 1487 | 1882.6 <sup>a</sup> | 1903.1 | 1883.2 | 1898.7 | 1900.5 | 1893.9 | 1886.1 | 1891.9 | 1891.9 | 1891.9 | 1891.8 | 1891.7 | 1891.7 | 1891.7 |
| gdb 1488 | 1877.8 <sup>a</sup> | 1890.0 | 1881.4 | 1882.2 | 1891.0 | 1885.5 | 1874.1 | 1876.1 | 1876.1 | 1876.1 | 1875.7 | 1875.7 | 1875.7 | 1875.7 |
| gdb 1489 | 1883.6 <sup>a</sup> | 1879.3 | 1872.8 | 1878.1 | 1891.2 | 1885.4 | 1873.0 | 1884.0 | 1884.0 | 1884.0 | 1878.4 | 1878.4 | 1878.4 | 1878.4 |
| gdb 1490 | 1886.1 <sup>a</sup> | 1893.2 | 1882.5 | 1888.5 | 1896.6 | 1890.4 | 1879.2 | 1886.1 | 1886.1 | 1886.1 | 1881.9 | 1881.9 | 1881.9 | 1881.9 |
| gdb 1491 | 1884.1 <sup>a</sup> | 1891.2 | 1880.6 | 1888.1 | 1895.5 | 1888.7 | 1876.2 | 1883.6 | 1883.6 | 1883.6 | 1879.7 | 1879.7 | 1879.7 | 1879.7 |
| gdb 1492 | 1887.3 <sup>a</sup> | 1882.8 | 1874.0 | 1879.8 | 1886.1 | 1884.6 | 1879.4 | 1888.0 | 1888.0 | 1888.0 | 1881.6 | 1881.6 | 1881.6 | 1881.6 |
| gdb 1493 | 1904.6 <sup>a</sup> | 1903.6 | 1907.0 | 1909.5 | 1908.6 | 1909.0 | 1907.6 | 1912.7 | 1912.7 | 1912.7 | 1912.7 | 1912.7 | 1912.7 | 1912.7 |
| gdb 1494 | 1889.0 <sup>a</sup> | 1885.6 | 1880.3 | 1880.9 | 1890.5 | 1888.4 | 1880.8 | 1885.8 | 1885.8 | 1885.8 | 1880.4 | 1880.4 | 1880.4 | 1880.4 |
| gdb 1495 | 1915.2 <sup>a</sup> | 1908.8 | 1911.9 | 1916.2 | 1918.3 | 1915.6 | 1906.6 | 1916.0 | 1916.0 | 1916.0 | 1911.9 | 1911.8 | 1911.8 | 1911.8 |
| gdb 1496 | 1910.6 <sup>a</sup> | 1910.8 | 1912.7 | 1912.6 | 1915.9 | 1916.0 | 1909.1 | 1917.2 | 1917.2 | 1917.2 | 1916.4 | 1916.4 | 1916.4 | 1916.4 |
| gdb 1497 | 1917.2 <sup>a</sup> | 1914.8 | 1917.2 | 1926.8 | 1921.1 | 1921.8 | 1916.9 | 1928.2 | 1928.2 | 1928.2 | 1930.2 | 1930.2 | 1930.2 | 1930.2 |
| gdb 1498 | 1879.2 <sup>a</sup> | 1881.8 | 1861.2 | 1879.0 | 1882.1 | 1877.9 | 1872.3 | 1882.3 | 1882.3 | 1882.3 | 1877.7 | 1877.7 | 1877.7 | 1877.7 |
| gdb 1499 | 1903.8 <sup>a</sup> | 1889.9 | 1867.0 | 1886.8 | 1900.6 | 1890.6 | 1883.1 | 1891.7 | 1891.7 | 1891.7 | 1889.7 | 1889.6 | 1889.6 | 1889.6 |
| gdb 1500 | 1887.8 <sup>a</sup> | 1894.8 | 1875.4 | 1890.6 | 1899.9 | 1891.8 | 1886.3 | 1894.0 | 1894.0 | 1894.0 | 1895.3 | 1895.3 | 1895.3 | 1895.3 |
| gdb 1501 | 1900.0 <sup>a</sup> | 1903.5 | 1898.0 | 1911.5 | 1910.1 | 1906.3 | 1900.6 | 1908.5 | 1908.5 | 1908.5 | 1910.6 | 1910.5 | 1910.5 | 1910.5 |
| gdb 1502 | 1899.4 <sup>a</sup> | 1886.1 | 1882.6 | 1892.2 | 1894.8 | 1894.3 | 1889.7 | 1901.5 | 1901.5 | 1901.5 | 1896.5 | 1896.5 | 1896.5 | 1896.5 |
| gdb 1503 | 1917.6 <sup>a</sup> | 1898.1 | 1893.2 | 1904.0 | 1914.8 | 1908.2 | 1904.2 | 1915.7 | 1915.7 | 1915.7 | 1912.5 | 1912.5 | 1912.5 | 1912.5 |
| gdb 1504 | 1906.6 <sup>a</sup> | 1900.1 | 1898.2 | 1904.5 | 1913.3 | 1908.1 | 1903.5 | 1913.4 | 1913.4 | 1913.4 | 1914.2 | 1914.2 | 1914.2 | 1914.2 |
| gdb 1505 | 1924.1 <sup>a</sup> | 1920.0 | 1923.7 | 1931.9 | 1933.1 | 1932.6 | 1926.4 | 1939.2 | 1939.2 | 1939.2 | 1941.3 | 1941.3 | 1941.3 | 1941.3 |
| gdb 1506 | 1920.2 <sup>a</sup> | 1910.5 | 1911.9 | 1917.8 | 1925.3 | 1921.5 | 1911.3 | 1921.9 | 1921.9 | 1921.9 | 1917.8 | 1917.7 | 1917.7 | 1917.7 |
| gdb 1507 | 1912.9 <sup>a</sup> | 1910.6 | 1914.9 | 1915.6 | 1922.4 | 1920.5 | 1910.7 | 1919.6 | 1919.6 | 1919.6 | 1920.1 | 1920.1 | 1920.1 | 1920.1 |
| gdb 1508 | 1864.4 <sup>a</sup> | 1875.7 | 1869.8 | 1877.7 | 1879.3 | 1872.7 | 1861.5 | 1871.7 | 1871.7 | 1871.7 | 1870.1 | 1870.1 | 1870.1 | 1870.1 |
| gdb 1509 | 1900.0 <sup>a</sup> | 1894.9 | 1894.0 | 1901.0 | 1902.9 | 1902.7 | 1898.7 | 1909.4 | 1909.4 | 1909.4 | 1906.2 | 1906.2 | 1906.2 | 1906.2 |
| gdb 1510 | 1905.2 <sup>a</sup> | 1905.2 | 1908.2 | 1911.2 | 1908.9 | 1908.9 | 1906.7 | 1912.9 | 1912.8 | 1912.8 | 1913.0 | 1913.0 | 1913.0 | 1913.0 |
| gdb 1511 | 1858.8 <sup>a</sup> | 1864.1 | 1858.7 | 1862.2 | 1865.3 | 1860.1 | 1851.2 | 1855.7 | 1855.7 | 1855.7 | 1857.6 | 1857.6 | 1857.6 | 1857.6 |
| gdb 1512 | 1895.2 <sup>a</sup> | 1889.8 | 1887.5 | 1897.5 | 1894.1 | 1893.6 | 1894.4 | 1902.0 | 1902.0 | 1902.0 | 1902.8 | 1902.8 | 1902.8 | 1902.8 |
| gdb 1513 | 1833.7 <sup>a</sup> | 1816.4 | 1777.6 | 1804.1 | 1824.2 | 1810.5 | 1802.8 | 1814.9 | 1814.9 | 1814.9 | 1808.1 | 1808.1 | 1808.1 | 1808.1 |
| gdb 1514 | 1829.9 <sup>a</sup> | 1826.9 | 1789.3 | 1812.0 | 1833.2 | 1815.7 | 1809.3 | 1816.3 | 1816.3 | 1816.3 | 1816.7 | 1816.7 | 1816.7 | 1816.7 |
| gdb 1515 | 1896.9 <sup>a</sup> | 1890.4 | 1865.9 | 1886.2 | 1896.1 | 1886.3 | 1873.2 | 1877.8 | 1877.8 | 1877.8 | 1878.6 | 1878.6 | 1878.6 | 1878.6 |
| gdb 1516 | 1884.6 <sup>a</sup> | 1887.7 | 1864.7 | 1884.4 | 1891.5 | 1886.3 | 1874.3 | 1882.8 | 1882.8 | 1882.8 | 1880.5 | 1880.5 | 1880.5 | 1880.5 |
| gdb 1517 | 1882.5 <sup>a</sup> | 1897.4 | 1876.0 | 1891.7 | 1899.2 | 1890.3 | 1879.7 | 1884.0 | 1884.0 | 1884.0 | 1888.0 | 1888.0 | 1888.0 | 1888.0 |
| gdb 1518 | 1853.3 <sup>a</sup> | 1844.5 | 1815.1 | 1836.4 | 1846.0 | 1842.2 | 1832.1 | 1840.0 | 1840.0 | 1840.0 | 1831.1 | 1831.1 | 1831.1 | 1831.1 |
| gdb 1519 | 1851.2 <sup>a</sup> | 1854.9 | 1827.1 | 1844.1 | 1855.9 | 1847.9 | 1839.0 | 1842.6 | 1842.6 | 1842.6 | 1840.2 | 1840.2 | 1840.2 | 1840.2 |
| gdb 1520 | 1847.6 <sup>a</sup> | 1852.2 | 1822.8 | 1840.9 | 1855.4 | 1844.2 | 1828.2 | 1830.1 | 1830.1 | 1830.1 | 1832.5 | 1832.5 | 1832.5 | 1832.5 |
| gdb 1521 | 1898.2 <sup>a</sup> | 1892.2 | 1869.8 | 1886.9 | 1897.6 | 1886.3 | 1876.6 | 1882.2 | 1882.2 | 1882.2 | 1880.8 | 1880.8 | 1880.8 | 1880.8 |
| gdb 1522 | 1876.6 <sup>a</sup> | 1882.9 | 1859.4 | 1877.1 | 1882.7 | 1874.6 | 1863.7 | 1870.7 | 1870.7 | 1870.7 | 1871.4 | 1871.4 | 1871.4 | 1871.4 |
| gdb 1523 | 1884.2 <sup>a</sup> | 1887.4 | 1863.5 | 1882.5 | 1887.1 | 1883.4 | 1875.4 | 1883.6 | 1883.6 | 1883.6 | 1880.0 | 1880.0 | 1880.0 | 1880.0 |
| gdb 1524 | 1885.6 <sup>a</sup> | 1897.9 | 1876.1 | 1890.8 | 1898.1 | 1890.1 | 1882.8 | 1886.6 | 1886.6 | 1886.6 | 1889.9 | 1889.9 | 1889.9 | 1889.9 |
| gdb 1525 | 1878.9 <sup>a</sup> | 1886.5 | 1874.1 | 1880.4 | 1888.7 | 1883.1 | 1871.4 | 1876.2 | 1876.2 | 1876.2 | 1876.1 | 1876.1 | 1876.1 | 1876.1 |
| gdb 1526 | 1895.3 <sup>a</sup> | 1892.4 | 1885.5 | 1896.6 | 1892.1 | 1892.9 | 1884.5 | 1900.4 | 1900.4 | 1900.4 | 1902.0 | 1901.9 | 1901.9 | 1901.9 |
| gdb 1527 | 1844.0 <sup>a</sup> | 1854.6 | 1848.4 | 1850.6 | 1853.4 | 1847.8 | 1841.4 | 1842.9 | 1842.8 | 1842.8 | 1841.8 | 1841.7 | 1841.7 | 1841.7 |
| gdb 1528 | 1874.6 <sup>a</sup> | 1867.4 | 1850.4 | 1867.6 | 1867.5 | 1866.1 | 1862.4 | 1871.3 | 1871.3 | 1871.3 | 1866.6 | 1866.5 | 1866.5 | 1866.5 |
| gdb 1529 | 1874.6 <sup>a</sup> | 1865.4 | 1846.8 | 1866.1 | 1871.8 | 1866.2 | 1857.8 | 1866.4 | 1866.4 | 1866.4 | 1866.2 | 1866.2 | 1866.2 | 1866.2 |

... continued on next page ...

Table S26: ... continued from previous page. ...

| Molecule | Ref.                | MNDO   | AMI    | PM3    | PM6    | PM7    | OM1    | OM2    |        | OM3    |        | D3T    |
|----------|---------------------|--------|--------|--------|--------|--------|--------|--------|--------|--------|--------|--------|
|          |                     |        |        |        |        |        |        | D2     | D3     | D2     | D3     |        |
| gdb 1530 | 1881.3 <sup>a</sup> | 1882.3 | 1868.1 | 1881.2 | 1883.9 | 1878.4 | 1875.8 | 1882.4 | 1882.5 | 1883.5 | 1883.5 | 1883.5 |
| gdb 1531 | 1878.3 <sup>a</sup> | 1884.1 | 1861.8 | 1879.4 | 1880.8 | 1877.3 | 1873.6 | 1882.4 | 1882.4 | 1877.7 | 1877.7 | 1877.7 |
| gdb 1532 | 1881.3 <sup>a</sup> | 1882.9 | 1857.2 | 1877.4 | 1885.2 | 1878.5 | 1871.1 | 1880.1 | 1880.1 | 1879.8 | 1879.8 | 1879.8 |
| gdb 1533 | 1885.5 <sup>a</sup> | 1897.5 | 1875.9 | 1890.5 | 1896.3 | 1889.3 | 1887.0 | 1893.0 | 1893.0 | 1893.8 | 1893.8 | 1893.8 |
| gdb 1534 | 1885.4 <sup>a</sup> | 1882.1 | 1874.0 | 1880.2 | 1887.4 | 1884.9 | 1877.5 | 1886.1 | 1886.1 | 1880.4 | 1880.4 | 1880.4 |
| gdb 1535 | 1872.1 <sup>a</sup> | 1880.1 | 1866.2 | 1873.9 | 1884.1 | 1876.2 | 1866.0 | 1875.8 | 1875.8 | 1872.9 | 1872.8 | 1872.8 |
| gdb 1536 | 1871.7 <sup>a</sup> | 1863.1 | 1848.4 | 1865.5 | 1872.2 | 1865.1 | 1856.9 | 1863.1 | 1863.1 | 1863.3 | 1863.3 | 1863.3 |
| gdb 1537 | 1879.0 <sup>a</sup> | 1879.8 | 1868.0 | 1880.0 | 1883.0 | 1877.2 | 1874.9 | 1879.3 | 1879.3 | 1880.9 | 1880.9 | 1880.9 |
| gdb 1538 | 1900.2 <sup>a</sup> | 1894.4 | 1875.5 | 1893.9 | 1902.1 | 1892.4 | 1879.8 | 1887.5 | 1887.5 | 1884.8 | 1884.8 | 1884.8 |
| gdb 1539 | 1880.6 <sup>a</sup> | 1887.0 | 1866.4 | 1886.7 | 1893.4 | 1884.9 | 1870.4 | 1880.2 | 1880.2 | 1878.4 | 1878.4 | 1878.4 |
| gdb 1540 | 1885.5 <sup>a</sup> | 1902.1 | 1885.8 | 1901.1 | 1906.2 | 1898.0 | 1885.8 | 1893.1 | 1893.1 | 1893.9 | 1893.8 | 1893.9 |
| gdb 1541 | 1863.6 <sup>a</sup> | 1854.4 | 1837.2 | 1852.8 | 1868.3 | 1858.6 | 1841.9 | 1854.0 | 1854.0 | 1849.7 | 1849.7 | 1849.7 |
| gdb 1542 | 1870.4 <sup>a</sup> | 1866.7 | 1851.0 | 1863.3 | 1874.2 | 1865.3 | 1853.6 | 1861.1 | 1861.1 | 1859.4 | 1859.3 | 1859.3 |
| gdb 1543 | 1854.8 <sup>a</sup> | 1837.6 | 1809.6 | 1830.5 | 1851.4 | 1835.9 | 1826.2 | 1842.1 | 1842.1 | 1836.9 | 1836.8 | 1836.8 |
| gdb 1544 | 1859.6 <sup>a</sup> | 1847.4 | 1822.6 | 1839.9 | 1857.4 | 1842.3 | 1836.8 | 1847.5 | 1847.5 | 1845.9 | 1845.9 | 1845.9 |
| gdb 1545 | 1846.4 <sup>a</sup> | 1841.8 | 1817.3 | 1836.1 | 1851.3 | 1842.8 | 1828.4 | 1839.0 | 1839.0 | 1830.6 | 1830.6 | 1830.6 |
| gdb 1546 | 1851.2 <sup>a</sup> | 1856.5 | 1835.7 | 1850.0 | 1864.1 | 1855.8 | 1844.2 | 1852.2 | 1852.2 | 1846.4 | 1846.4 | 1846.4 |
| gdb 1547 | 1900.1 <sup>a</sup> | 1894.0 | 1875.7 | 1894.2 | 1903.6 | 1892.8 | 1879.3 | 1887.7 | 1887.7 | 1885.0 | 1885.0 | 1885.0 |
| gdb 1548 | 1884.4 <sup>a</sup> | 1888.4 | 1868.5 | 1887.9 | 1898.7 | 1888.8 | 1872.9 | 1883.3 | 1883.3 | 1881.7 | 1881.7 | 1881.7 |
| gdb 1549 | 1887.1 <sup>a</sup> | 1904.4 | 1885.9 | 1900.9 | 1907.3 | 1898.8 | 1887.7 | 1894.3 | 1894.3 | 1895.1 | 1895.1 | 1895.1 |
| gdb 1550 | 1874.2 <sup>a</sup> | 1865.2 | 1849.4 | 1866.4 | 1867.9 | 1866.1 | 1862.2 | 1871.7 | 1871.7 | 1866.5 | 1866.5 | 1866.5 |
| gdb 1551 | 1874.4 <sup>a</sup> | 1864.6 | 1847.5 | 1865.4 | 1873.8 | 1866.5 | 1857.3 | 1866.0 | 1866.0 | 1865.2 | 1865.2 | 1865.2 |
| gdb 1552 | 1883.5 <sup>a</sup> | 1882.5 | 1868.3 | 1880.2 | 1885.4 | 1879.4 | 1877.4 | 1883.8 | 1883.8 | 1884.4 | 1884.4 | 1884.4 |
| gdb 1553 | 1886.8 <sup>a</sup> | 1870.3 | 1859.8 | 1875.8 | 1884.9 | 1876.7 | 1869.0 | 1885.3 | 1885.3 | 1881.6 | 1881.6 | 1881.6 |
| gdb 1554 | 1887.1 <sup>a</sup> | 1867.6 | 1857.0 | 1874.9 | 1886.8 | 1878.6 | 1869.0 | 1886.6 | 1886.6 | 1884.4 | 1884.3 | 1884.3 |
| gdb 1555 | 1897.8 <sup>a</sup> | 1884.2 | 1875.8 | 1889.8 | 1896.1 | 1889.5 | 1883.6 | 1895.8 | 1895.8 | 1896.6 | 1896.6 | 1896.6 |
| gdb 1556 | 1890.8 <sup>a</sup> | 1873.0 | 1874.7 | 1881.1 | 1895.5 | 1889.2 | 1878.1 | 1901.0 | 1901.0 | 1889.2 | 1889.2 | 1889.2 |
| gdb 1557 | 1895.8 <sup>a</sup> | 1881.5 | 1883.2 | 1887.5 | 1899.8 | 1895.7 | 1886.4 | 1902.1 | 1902.1 | 1896.8 | 1896.8 | 1896.8 |
| gdb 1558 | 1897.8 <sup>a</sup> | 1886.4 | 1881.9 | 1891.3 | 1892.7 | 1893.2 | 1890.6 | 1901.5 | 1901.5 | 1896.3 | 1896.3 | 1896.3 |
| gdb 1559 | 1895.9 <sup>a</sup> | 1889.8 | 1882.4 | 1892.7 | 1901.5 | 1897.9 | 1892.4 | 1904.0 | 1904.0 | 1902.1 | 1902.1 | 1902.1 |
| gdb 1560 | 1904.5 <sup>a</sup> | 1902.1 | 1898.3 | 1904.3 | 1909.2 | 1905.9 | 1904.7 | 1912.5 | 1912.5 | 1912.8 | 1912.8 | 1912.8 |
| gdb 1561 | 1891.5 <sup>a</sup> | 1883.0 | 1881.3 | 1880.9 | 1892.5 | 1890.8 | 1882.1 | 1888.8 | 1888.8 | 1882.6 | 1882.6 | 1882.6 |
| gdb 1562 | 1870.1 <sup>a</sup> | 1866.8 | 1851.2 | 1863.9 | 1876.9 | 1866.5 | 1854.1 | 1862.5 | 1862.5 | 1861.1 | 1861.1 | 1861.1 |
| gdb 1563 | 1869.1 <sup>a</sup> | 1874.2 | 1861.5 | 1869.7 | 1880.7 | 1872.1 | 1860.2 | 1869.1 | 1869.1 | 1865.9 | 1865.9 | 1865.9 |
| gdb 1564 | 1869.4 <sup>a</sup> | 1879.8 | 1863.9 | 1872.6 | 1882.1 | 1873.9 | 1864.4 | 1873.9 | 1873.9 | 1871.3 | 1871.3 | 1871.3 |
| gdb 1565 | 1910.1 <sup>a</sup> | 1910.6 | 1912.6 | 1916.1 | 1912.8 | 1912.9 | 1909.5 | 1915.9 | 1915.9 | 1916.8 | 1916.8 | 1916.8 |
| gdb 1566 | 1869.0 <sup>a</sup> | 1873.0 | 1861.7 | 1869.5 | 1880.2 | 1872.2 | 1860.3 | 1868.9 | 1868.9 | 1865.8 | 1865.8 | 1865.8 |
| gdb 1567 | 1923.2 <sup>a</sup> | 1907.7 | 1911.2 | 1916.7 | 1924.3 | 1920.2 | 1910.0 | 1921.1 | 1921.1 | 1916.7 | 1916.7 | 1916.7 |
| gdb 1568 | 1916.9 <sup>a</sup> | 1909.0 | 1916.5 | 1915.9 | 1923.9 | 1921.4 | 1911.4 | 1921.4 | 1921.4 | 1921.4 | 1921.4 | 1921.4 |
| gdb 1569 | 1887.9 <sup>a</sup> | 1881.0 | 1874.2 | 1879.5 | 1886.7 | 1885.1 | 1878.6 | 1887.6 | 1887.6 | 1881.1 | 1881.1 | 1881.1 |
| gdb 1570 | 1905.7 <sup>a</sup> | 1902.9 | 1910.6 | 1910.7 | 1911.6 | 1908.8 | 1914.9 | 1914.9 | 1914.9 | 1914.7 | 1914.7 | 1914.7 |
| gdb 1571 | 1887.8 <sup>a</sup> | 1882.6 | 1881.1 | 1880.3 | 1890.9 | 1888.7 | 1880.4 | 1886.8 | 1886.8 | 1880.7 | 1880.8 | 1880.8 |
| gdb 1572 | 1912.8 <sup>a</sup> | 1909.2 | 1914.6 | 1914.2 | 1918.8 | 1919.1 | 1910.9 | 1919.2 | 1919.2 | 1918.9 | 1918.8 | 1918.8 |
| gdb 1573 | 1916.5 <sup>a</sup> | 1916.7 | 1916.0 | 1925.1 | 1917.7 | 1920.2 | 1918.4 | 1928.3 | 1928.3 | 1929.6 | 1929.6 | 1929.6 |
| gdb 1574 | 1919.7 <sup>a</sup> | 1907.4 | 1912.5 | 1916.2 | 1918.6 | 1915.1 | 1904.8 | 1915.7 | 1915.7 | 1910.8 | 1910.8 | 1910.8 |

... continued on next page ...

Table S26: . . . continued from previous page . . .

| Molecule | Ref.                | MNDO   | AMI    | PM3    | PM6    | PM7    | OM1    | OM2    |        | OM3    |        | D3T    |        |
|----------|---------------------|--------|--------|--------|--------|--------|--------|--------|--------|--------|--------|--------|--------|
|          |                     |        |        |        |        |        |        | D2     | D3     | D2     | D3     |        |        |
| gdb 1575 | 1905.9 <sup>a</sup> | 1899.6 | 1902.3 | 1905.0 | 1911.4 | 1910.4 | 1898.6 | 1911.7 | 1911.6 | 1911.7 | 1911.7 | 1907.9 | 1907.9 |
| gdb 1576 | 1915.0 <sup>a</sup> | 1910.2 | 1914.5 | 1914.6 | 1919.1 | 1917.9 | 1910.0 | 1919.3 | 1919.3 | 1919.3 | 1919.3 | 1919.0 | 1919.0 |
| gdb 1577 | 1869.0 <sup>a</sup> | 1873.9 | 1874.8 | 1875.9 | 1878.9 | 1872.6 | 1865.0 | 1880.7 | 1880.6 | 1880.7 | 1880.7 | 1869.8 | 1869.7 |
| gdb 1578 | 1872.1 <sup>a</sup> | 1876.2 | 1875.5 | 1876.3 | 1881.5 | 1875.8 | 1868.1 | 1882.9 | 1882.8 | 1882.8 | 1882.8 | 1873.0 | 1873.0 |
| gdb 1579 | 1872.6 <sup>a</sup> | 1877.5 | 1882.0 | 1880.6 | 1882.9 | 1877.8 | 1870.9 | 1881.2 | 1881.2 | 1881.2 | 1881.2 | 1876.9 | 1876.8 |
| gdb 1580 | 1902.0 <sup>a</sup> | 1900.7 | 1897.2 | 1903.9 | 1903.3 | 1902.4 | 1898.0 | 1908.1 | 1908.1 | 1908.1 | 1908.1 | 1905.2 | 1905.2 |
| gdb 1581 | 1908.6 <sup>a</sup> | 1911.3 | 1910.2 | 1914.0 | 1909.6 | 1909.9 | 1907.6 | 1913.7 | 1913.7 | 1913.7 | 1913.7 | 1914.1 | 1914.1 |
| gdb 1582 | 1859.4 <sup>a</sup> | 1863.0 | 1853.6 | 1863.0 | 1865.8 | 1860.1 | 1848.9 | 1862.0 | 1861.9 | 1862.0 | 1862.0 | 1856.9 | 1855.9 |
| gdb 1583 | 1867.5 <sup>a</sup> | 1876.3 | 1871.5 | 1876.6 | 1878.2 | 1872.9 | 1865.5 | 1875.1 | 1875.1 | 1875.1 | 1875.1 | 1871.9 | 1872.0 |
| gdb 1584 | 1861.4 <sup>a</sup> | 1862.4 | 1853.8 | 1863.9 | 1866.1 | 1860.7 | 1849.0 | 1862.8 | 1862.8 | 1862.8 | 1862.8 | 1857.0 | 1857.1 |
| gdb 1585 | 1859.1 <sup>a</sup> | 1868.3 | 1860.8 | 1865.0 | 1867.1 | 1861.0 | 1851.5 | 1856.9 | 1856.8 | 1856.9 | 1856.9 | 1853.4 | 1853.3 |
| gdb 1586 | 1899.8 <sup>a</sup> | 1899.1 | 1897.1 | 1904.2 | 1904.0 | 1903.1 | 1898.5 | 1909.3 | 1909.3 | 1909.3 | 1909.3 | 1906.4 | 1906.4 |
| gdb 1587 | 1907.2 <sup>a</sup> | 1910.9 | 1911.3 | 1915.2 | 1912.3 | 1912.4 | 1910.0 | 1916.1 | 1916.1 | 1916.1 | 1916.1 | 1916.3 | 1916.3 |
| gdb 1588 | 1906.5 <sup>a</sup> | 1898.8 | 1901.5 | 1903.8 | 1909.9 | 1909.9 | 1900.2 | 1912.5 | 1912.5 | 1912.5 | 1912.5 | 1908.3 | 1908.3 |
| gdb 1589 | 1914.0 <sup>a</sup> | 1909.1 | 1913.4 | 1912.9 | 1915.7 | 1915.8 | 1909.2 | 1917.9 | 1917.9 | 1917.9 | 1917.9 | 1916.9 | 1916.9 |
| gdb 1590 | 1869.3 <sup>a</sup> | 1872.5 | 1875.4 | 1874.4 | 1877.7 | 1871.4 | 1863.6 | 1878.9 | 1878.8 | 1878.9 | 1878.9 | 1867.9 | 1867.9 |
| gdb 1591 | 1871.5 <sup>a</sup> | 1875.3 | 1879.8 | 1878.1 | 1880.1 | 1875.3 | 1870.0 | 1879.9 | 1879.9 | 1879.9 | 1879.9 | 1875.2 | 1875.2 |
| gdb 1592 | 1872.4 <sup>a</sup> | 1877.1 | 1882.5 | 1879.4 | 1880.3 | 1876.2 | 1869.0 | 1878.8 | 1878.7 | 1878.8 | 1878.8 | 1874.5 | 1874.5 |
| gdb 1593 | 1825.9 <sup>a</sup> | 1806.6 | 1781.4 | 1797.4 | 1820.6 | 1807.6 | 1803.9 | 1813.5 | 1813.5 | 1813.5 | 1813.5 | 1805.6 | 1805.6 |
| gdb 1594 | 1835.3 <sup>a</sup> | 1822.5 | 1796.6 | 1811.0 | 1835.2 | 1819.9 | 1818.6 | 1826.0 | 1826.0 | 1826.0 | 1826.0 | 1822.7 | 1822.3 |
| gdb 1595 | 1842.1 <sup>a</sup> | 1824.3 | 1797.0 | 1811.2 | 1827.5 | 1817.1 | 1818.5 | 1823.8 | 1823.8 | 1823.8 | 1823.8 | 1819.7 | 1819.7 |
| gdb 1596 | 1837.7 <sup>a</sup> | 1837.8 | 1814.8 | 1826.3 | 1841.5 | 1832.2 | 1821.4 | 1824.1 | 1824.1 | 1824.1 | 1824.1 | 1817.8 | 1817.8 |
| gdb 1597 | 1843.4 <sup>a</sup> | 1849.8 | 1826.4 | 1837.2 | 1852.5 | 1842.3 | 1833.3 | 1831.5 | 1831.5 | 1831.5 | 1831.5 | 1831.7 | 1831.7 |
| gdb 1598 | 1849.8 <sup>a</sup> | 1855.1 | 1833.7 | 1842.4 | 1852.8 | 1846.8 | 1841.8 | 1840.7 | 1840.7 | 1840.7 | 1840.7 | 1837.5 | 1837.5 |
| gdb 1599 | 1878.6 <sup>a</sup> | 1867.0 | 1861.5 | 1872.3 | 1877.4 | 1872.3 | 1868.0 | 1879.5 | 1879.5 | 1879.5 | 1879.5 | 1876.9 | 1876.9 |
| gdb 1600 | 1883.2 <sup>a</sup> | 1870.7 | 1861.8 | 1873.4 | 1879.2 | 1874.4 | 1872.6 | 1883.1 | 1883.1 | 1883.1 | 1883.1 | 1879.6 | 1879.5 |
| gdb 1601 | 1896.1 <sup>a</sup> | 1883.9 | 1876.4 | 1885.0 | 1881.9 | 1880.5 | 1883.7 | 1889.0 | 1889.0 | 1889.0 | 1889.0 | 1888.7 | 1888.7 |
| gdb 1602 | 1887.2 <sup>a</sup> | 1891.4 | 1886.9 | 1891.0 | 1891.8 | 1888.2 | 1886.6 | 1890.9 | 1890.9 | 1890.9 | 1890.9 | 1889.9 | 1889.9 |
| gdb 1603 | 1890.0 <sup>a</sup> | 1891.2 | 1888.7 | 1890.8 | 1892.8 | 1888.5 | 1887.8 | 1892.7 | 1892.7 | 1892.7 | 1892.7 | 1891.6 | 1891.5 |
| gdb 1604 | 1894.4 <sup>a</sup> | 1903.0 | 1897.7 | 1900.0 | 1896.1 | 1894.2 | 1897.5 | 1894.7 | 1894.7 | 1894.7 | 1894.7 | 1898.1 | 1898.1 |
| gdb 1605 | 1868.5 <sup>a</sup> | 1875.5 | 1879.9 | 1875.4 | 1876.8 | 1870.5 | 1863.0 | 1873.9 | 1873.9 | 1873.9 | 1873.9 | 1864.8 | 1864.8 |
| gdb 1606 | 1871.4 <sup>a</sup> | 1877.4 | 1878.8 | 1875.8 | 1880.1 | 1874.6 | 1867.6 | 1878.0 | 1877.9 | 1877.9 | 1877.9 | 1869.4 | 1869.4 |
| gdb 1607 | 1871.8 <sup>a</sup> | 1879.2 | 1885.7 | 1880.7 | 1881.1 | 1876.3 | 1870.8 | 1877.0 | 1877.0 | 1877.0 | 1877.0 | 1873.8 | 1873.8 |
| gdb 1608 | 1878.9 <sup>a</sup> | 1879.5 | 1866.8 | 1878.4 | 1885.8 | 1880.8 | 1873.3 | 1879.7 | 1879.7 | 1879.7 | 1879.7 | 1876.1 | 1876.1 |
| gdb 1609 | 1901.6 <sup>a</sup> | 1887.6 | 1869.8 | 1884.7 | 1899.8 | 1891.2 | 1883.6 | 1888.1 | 1888.0 | 1888.0 | 1888.0 | 1886.5 | 1886.5 |
| gdb 1610 | 1882.7 <sup>a</sup> | 1892.1 | 1879.3 | 1889.8 | 1899.6 | 1892.4 | 1886.1 | 1890.4 | 1890.4 | 1890.4 | 1890.4 | 1891.8 | 1891.8 |
| gdb 1611 | 1890.8 <sup>a</sup> | 1889.9 | 1884.9 | 1894.6 | 1890.7 | 1892.0 | 1894.0 | 1897.1 | 1897.0 | 1897.1 | 1897.1 | 1899.2 | 1899.2 |
| gdb 1612 | 1893.6 <sup>a</sup> | 1904.6 | 1900.0 | 1910.0 | 1899.4 | 1900.5 | 1901.5 | 1903.9 | 1903.9 | 1903.9 | 1903.9 | 1905.3 | 1905.2 |
| gdb 1613 | 1895.4 <sup>a</sup> | 1890.0 | 1886.8 | 1896.9 | 1891.3 | 1892.4 | 1894.5 | 1901.9 | 1901.9 | 1901.9 | 1901.9 | 1902.8 | 1902.8 |
| gdb 1614 | 1871.3 <sup>a</sup> | 1868.0 | 1853.9 | 1863.1 | 1868.9 | 1869.0 | 1869.1 | 1875.1 | 1875.1 | 1875.1 | 1875.1 | 1869.7 | 1869.7 |
| gdb 1615 | 1873.9 <sup>a</sup> | 1869.2 | 1855.3 | 1863.4 | 1872.4 | 1872.6 | 1874.2 | 1877.7 | 1877.7 | 1877.7 | 1877.7 | 1874.9 | 1874.9 |
| gdb 1616 | 1882.6 <sup>a</sup> | 1880.6 | 1867.2 | 1873.3 | 1881.8 | 1879.5 | 1881.6 | 1883.8 | 1883.8 | 1883.8 | 1883.8 | 1885.1 | 1884.9 |
| gdb 1617 | 1896.0 <sup>a</sup> | 1893.6 | 1880.0 | 1898.0 | 1898.6 | 1899.1 | 1899.5 | 1905.0 | 1905.0 | 1905.0 | 1905.0 | 1906.6 | 1906.6 |
| gdb 1618 | 1886.4 <sup>a</sup> | 1884.9 | 1885.7 | 1893.6 | 1888.0 | 1889.1 | 1893.2 | 1894.4 | 1894.4 | 1894.4 | 1894.4 | 1896.7 | 1896.7 |
| gdb 1619 | 1871.4 <sup>a</sup> | 1864.1 | 1851.6 | 1862.1 | 1865.3 | 1865.5 | 1865.8 | 1870.4 | 1870.4 | 1870.4 | 1870.4 | 1865.6 | 1865.6 |

. . . continued on next page . . .

Table S26: ... continued from previous page. ...

| Molecule | Ref.                | MNDO   | AMI    | PM3    | PM6    | PM7    | OM1    | OM2    |        |        | OM3    |        |        | D3T    |
|----------|---------------------|--------|--------|--------|--------|--------|--------|--------|--------|--------|--------|--------|--------|--------|
|          |                     |        |        |        |        |        |        | D2     | D3     | D3T    | D2     | D3     | D3T    |        |
| gdb 1620 | 1876.2 <sup>a</sup> | 1864.7 | 1853.3 | 1862.9 | 1868.5 | 1868.0 | 1868.7 | 1873.7 | 1873.6 | 1873.6 | 1869.3 | 1869.3 | 1869.3 | 1869.3 |
| gdb 1621 | 1873.9 <sup>a</sup> | 1875.1 | 1863.3 | 1871.1 | 1876.1 | 1873.5 | 1874.1 | 1876.7 | 1876.7 | 1876.7 | 1880.1 | 1877.9 | 1880.1 | 1880.1 |
| gdb 1622 | 1834.9 <sup>a</sup> | 1814.8 | 1781.0 | 1802.8 | 1823.1 | 1810.9 | 1804.5 | 1815.8 | 1815.8 | 1815.8 | 1808.2 | 1808.7 | 1808.7 | 1808.7 |
| gdb 1623 | 1838.1 <sup>a</sup> | 1826.6 | 1793.0 | 1812.5 | 1812.5 | 1818.2 | 1813.8 | 1821.0 | 1821.0 | 1821.0 | 1820.0 | 1820.0 | 1820.0 | 1820.0 |
| gdb 1624 | 1846.8 <sup>a</sup> | 1843.1 | 1814.8 | 1830.5 | 1845.1 | 1837.8 | 1825.3 | 1830.2 | 1830.2 | 1830.2 | 1824.8 | 1824.8 | 1824.8 | 1824.8 |
| gdb 1625 | 1844.9 <sup>a</sup> | 1844.4 | 1817.1 | 1831.6 | 1846.5 | 1838.2 | 1824.6 | 1829.2 | 1829.2 | 1829.2 | 1823.7 | 1823.7 | 1823.7 | 1823.7 |
| gdb 1626 | 1850.9 <sup>a</sup> | 1846.0 | 1817.8 | 1834.1 | 1844.7 | 1842.2 | 1833.9 | 1840.7 | 1840.6 | 1840.6 | 1830.8 | 1830.8 | 1830.8 | 1830.8 |
| gdb 1627 | 1849.8 <sup>a</sup> | 1854.1 | 1826.9 | 1840.2 | 1855.1 | 1845.3 | 1833.9 | 1835.0 | 1835.0 | 1835.0 | 1836.1 | 1836.1 | 1836.1 | 1836.1 |
| gdb 1628 | 1845.6 <sup>a</sup> | 1854.5 | 1827.6 | 1840.6 | 1855.9 | 1845.0 | 1832.6 | 1833.5 | 1833.5 | 1833.5 | 1834.5 | 1834.5 | 1834.5 | 1834.5 |
| gdb 1629 | 1853.7 <sup>a</sup> | 1856.6 | 1829.0 | 1843.1 | 1854.6 | 1849.3 | 1842.6 | 1845.4 | 1845.4 | 1845.4 | 1841.8 | 1841.8 | 1841.8 | 1841.8 |
| gdb 1630 | 1874.3 <sup>a</sup> | 1880.3 | 1868.1 | 1871.6 | 1878.7 | 1875.9 | 1867.4 | 1874.3 | 1874.3 | 1874.3 | 1866.8 | 1866.8 | 1866.8 | 1866.8 |
| gdb 1631 | 1876.3 <sup>a</sup> | 1890.6 | 1878.9 | 1880.5 | 1887.9 | 1882.5 | 1875.3 | 1878.9 | 1878.9 | 1878.9 | 1877.5 | 1877.5 | 1877.5 | 1877.5 |
| gdb 1632 | 1829.1 <sup>a</sup> | 1811.9 | 1782.2 | 1800.9 | 1822.6 | 1809.7 | 1804.9 | 1813.2 | 1813.2 | 1813.2 | 1806.2 | 1806.2 | 1806.2 | 1806.2 |
| gdb 1633 | 1830.8 <sup>a</sup> | 1822.6 | 1794.7 | 1810.2 | 1832.5 | 1816.3 | 1814.6 | 1817.2 | 1817.2 | 1817.2 | 1816.4 | 1816.4 | 1816.4 | 1816.4 |
| gdb 1634 | 1843.1 <sup>a</sup> | 1841.2 | 1817.6 | 1830.7 | 1845.8 | 1837.5 | 1826.1 | 1828.1 | 1828.1 | 1828.1 | 1823.0 | 1823.0 | 1823.0 | 1823.0 |
| gdb 1635 | 1842.0 <sup>a</sup> | 1849.8 | 1827.8 | 1838.7 | 1855.2 | 1844.3 | 1834.0 | 1831.3 | 1831.3 | 1831.3 | 1833.3 | 1833.3 | 1833.3 | 1833.3 |
| gdb 1636 | 1899.2 <sup>a</sup> | 1888.0 | 1871.0 | 1884.7 | 1897.2 | 1888.6 | 1880.4 | 1883.0 | 1883.0 | 1883.0 | 1881.7 | 1881.7 | 1881.7 | 1881.7 |
| gdb 1637 | 1880.8 <sup>a</sup> | 1882.2 | 1867.1 | 1879.4 | 1886.6 | 1882.3 | 1873.9 | 1879.0 | 1879.0 | 1879.0 | 1876.2 | 1876.2 | 1876.2 | 1876.2 |
| gdb 1638 | 1880.5 <sup>a</sup> | 1893.1 | 1877.7 | 1888.1 | 1896.9 | 1890.1 | 1880.9 | 1883.7 | 1883.7 | 1883.7 | 1887.1 | 1887.1 | 1887.1 | 1887.1 |
| gdb 1639 | 1871.3 <sup>a</sup> | 1867.9 | 1855.5 | 1864.1 | 1866.5 | 1866.6 | 1868.4 | 1870.0 | 1870.0 | 1870.0 | 1866.2 | 1866.2 | 1866.2 | 1866.2 |
| gdb 1640 | 1874.7 <sup>a</sup> | 1868.9 | 1856.9 | 1865.0 | 1869.3 | 1868.4 | 1870.3 | 1872.2 | 1872.2 | 1872.2 | 1869.1 | 1869.1 | 1869.1 | 1869.1 |
| gdb 1641 | 1875.7 <sup>a</sup> | 1878.8 | 1867.5 | 1873.3 | 1878.3 | 1875.4 | 1879.3 | 1877.5 | 1877.5 | 1877.5 | 1880.4 | 1880.4 | 1880.4 | 1880.4 |
| gdb 1642 | 1848.8 <sup>a</sup> | 1839.8 | 1819.4 | 1832.9 | 1844.9 | 1841.1 | 1834.2 | 1839.1 | 1839.1 | 1839.1 | 1829.7 | 1829.7 | 1829.7 | 1829.7 |
| gdb 1643 | 1845.8 <sup>a</sup> | 1839.2 | 1815.5 | 1829.6 | 1844.7 | 1837.6 | 1827.8 | 1831.1 | 1831.0 | 1831.0 | 1825.5 | 1825.5 | 1825.5 | 1825.5 |
| gdb 1644 | 1850.5 <sup>a</sup> | 1851.4 | 1830.5 | 1842.1 | 1854.6 | 1848.4 | 1842.8 | 1844.0 | 1844.0 | 1844.0 | 1840.9 | 1840.9 | 1840.9 | 1840.9 |
| gdb 1645 | 1849.3 <sup>a</sup> | 1850.8 | 1827.7 | 1839.6 | 1855.8 | 1845.5 | 1837.0 | 1835.9 | 1835.9 | 1835.9 | 1837.0 | 1837.0 | 1837.0 | 1837.0 |
| gdb 1646 | 1896.3 <sup>a</sup> | 1888.1 | 1871.4 | 1883.8 | 1895.2 | 1885.8 | 1877.7 | 1880.4 | 1880.4 | 1880.4 | 1878.7 | 1878.7 | 1878.7 | 1878.7 |
| gdb 1647 | 1875.1 <sup>a</sup> | 1879.9 | 1863.4 | 1874.9 | 1882.8 | 1875.8 | 1868.3 | 1872.9 | 1872.9 | 1872.9 | 1871.7 | 1871.7 | 1871.7 | 1871.7 |
| gdb 1648 | 1879.9 <sup>a</sup> | 1882.5 | 1866.9 | 1878.5 | 1886.4 | 1882.2 | 1874.9 | 1879.6 | 1879.6 | 1879.6 | 1876.2 | 1876.2 | 1876.2 | 1876.2 |
| gdb 1649 | 1882.5 <sup>a</sup> | 1895.3 | 1877.5 | 1888.1 | 1895.1 | 1889.1 | 1883.7 | 1884.0 | 1884.0 | 1884.0 | 1887.0 | 1886.9 | 1886.9 | 1886.9 |
| gdb 1650 | 1874.8 <sup>a</sup> | 1871.6 | 1863.5 | 1867.3 | 1876.1 | 1873.7 | 1867.6 | 1874.4 | 1874.4 | 1874.4 | 1866.3 | 1866.3 | 1866.3 | 1866.3 |
| gdb 1651 | 1878.4 <sup>a</sup> | 1885.2 | 1876.2 | 1877.8 | 1887.0 | 1881.6 | 1877.8 | 1879.7 | 1879.7 | 1879.7 | 1878.5 | 1878.5 | 1878.5 | 1878.5 |
| gdb 1652 | 1872.0 <sup>a</sup> | 1883.3 | 1861.4 | 1876.0 | 1878.8 | 1873.1 | 1865.9 | 1867.0 | 1867.0 | 1867.0 | 1867.1 | 1867.0 | 1867.0 | 1867.0 |
| gdb 1653 | 1869.4 <sup>a</sup> | 1884.2 | 1864.0 | 1876.3 | 1878.5 | 1872.0 | 1866.7 | 1868.9 | 1868.9 | 1868.9 | 1867.4 | 1867.4 | 1867.4 | 1867.4 |
| gdb 1654 | 1877.4 <sup>a</sup> | 1887.2 | 1864.1 | 1880.0 | 1878.5 | 1878.2 | 1874.7 | 1877.8 | 1877.8 | 1877.8 | 1873.4 | 1873.4 | 1873.4 | 1873.4 |
| gdb 1655 | 1876.9 <sup>a</sup> | 1897.2 | 1876.5 | 1888.1 | 1885.6 | 1881.8 | 1880.4 | 1877.9 | 1877.9 | 1877.9 | 1880.6 | 1880.6 | 1880.6 | 1880.6 |
| gdb 1656 | 1870.6 <sup>a</sup> | 1867.8 | 1857.5 | 1863.9 | 1867.4 | 1866.5 | 1868.7 | 1870.4 | 1870.4 | 1870.4 | 1866.3 | 1866.3 | 1866.3 | 1866.3 |
| gdb 1657 | 1872.0 <sup>a</sup> | 1869.1 | 1855.3 | 1864.3 | 1868.0 | 1868.5 | 1870.8 | 1872.2 | 1872.2 | 1872.2 | 1868.1 | 1868.1 | 1868.1 | 1868.1 |
| gdb 1658 | 1875.2 <sup>a</sup> | 1879.8 | 1867.8 | 1873.3 | 1875.2 | 1873.0 | 1877.2 | 1873.0 | 1873.0 | 1873.0 | 1876.4 | 1876.4 | 1876.4 | 1876.4 |
| gdb 1659 | 1867.3 <sup>a</sup> | 1866.1 | 1856.1 | 1862.3 | 1868.7 | 1865.3 | 1867.2 | 1870.1 | 1870.1 | 1870.1 | 1865.7 | 1865.7 | 1865.7 | 1865.7 |
| gdb 1660 | 1872.4 <sup>a</sup> | 1867.9 | 1854.4 | 1864.0 | 1868.7 | 1868.6 | 1870.0 | 1872.4 | 1872.4 | 1872.4 | 1868.6 | 1868.6 | 1868.6 | 1868.6 |
| gdb 1661 | 1873.9 <sup>a</sup> | 1879.4 | 1867.5 | 1873.6 | 1879.0 | 1875.6 | 1879.2 | 1876.2 | 1876.2 | 1876.2 | 1879.9 | 1879.9 | 1879.9 | 1879.9 |
| gdb 1662 | 1892.2 <sup>a</sup> | 1892.9 | 1890.4 | 1897.0 | 1891.9 | 1892.6 | 1897.5 | 1898.2 | 1898.2 | 1898.2 | 1900.9 | 1900.9 | 1900.9 | 1900.9 |
| gdb 1663 | 1872.6 <sup>a</sup> | 1880.9 | 1858.4 | 1876.1 | 1880.5 | 1875.7 | 1868.3 | 1872.0 | 1872.0 | 1872.0 | 1871.6 | 1871.6 | 1871.6 | 1871.6 |
| gdb 1664 | 1874.3 <sup>a</sup> | 1881.9 | 1864.6 | 1878.3 | 1877.2 | 1875.2 | 1872.2 | 1876.8 | 1876.8 | 1876.8 | 1872.4 | 1872.4 | 1872.4 | 1872.4 |

... continued on next page ...



Table S26: ... continued from previous page. ...

| Molecule | Ref.                | MNDO   | AMI    | PM3    | PM6    | PM7    | OM2    |        |        | OM3    |        |        |        |        |
|----------|---------------------|--------|--------|--------|--------|--------|--------|--------|--------|--------|--------|--------|--------|--------|
|          |                     |        |        |        |        |        | D2     | D3     | D3T    | D2     | D3     | D3T    |        |        |
| gdb 1665 | 1879.0 <sup>a</sup> | 1894.5 | 1877.8 | 1888.9 | 1889.3 | 1884.9 | 1883.1 | 1884.8 | 1884.8 | 1885.4 | 1884.8 | 1885.4 | 1885.4 | 1885.4 |
| gdb 1666 | 1844.6 <sup>a</sup> | 1837.2 | 1818.4 | 1829.5 | 1843.3 | 1839.0 | 1833.5 | 1839.9 | 1839.9 | 1839.9 | 1839.9 | 1829.3 | 1829.3 | 1829.3 |
| gdb 1667 | 1845.4 <sup>a</sup> | 1835.3 | 1813.5 | 1827.6 | 1844.8 | 1837.4 | 1827.0 | 1832.2 | 1832.2 | 1832.2 | 1832.2 | 1825.8 | 1825.8 | 1825.8 |
| gdb 1668 | 1853.1 <sup>a</sup> | 1853.2 | 1833.7 | 1843.1 | 1856.5 | 1849.9 | 1847.1 | 1849.7 | 1849.7 | 1849.7 | 1849.7 | 1844.5 | 1844.5 | 1844.5 |
| gdb 1669 | 1852.0 <sup>a</sup> | 1849.9 | 1830.7 | 1841.3 | 1855.9 | 1849.9 | 1846.7 | 1850.2 | 1850.2 | 1850.2 | 1850.2 | 1844.7 | 1844.7 | 1844.7 |
| gdb 1670 | 1884.7 <sup>a</sup> | 1868.9 | 1862.2 | 1874.8 | 1879.9 | 1875.0 | 1871.7 | 1883.5 | 1883.5 | 1883.5 | 1883.5 | 1879.8 | 1879.8 | 1879.8 |
| gdb 1671 | 1884.1 <sup>a</sup> | 1867.0 | 1860.0 | 1873.7 | 1879.6 | 1875.0 | 1871.1 | 1884.3 | 1884.3 | 1884.3 | 1884.3 | 1881.5 | 1881.5 | 1881.5 |
| gdb 1672 | 1894.6 <sup>a</sup> | 1882.4 | 1877.3 | 1886.3 | 1883.8 | 1881.9 | 1884.0 | 1890.7 | 1890.7 | 1890.7 | 1890.7 | 1890.6 | 1890.6 | 1890.6 |
| gdb 1673 | 1887.9 <sup>a</sup> | 1886.4 | 1883.1 | 1890.0 | 1893.9 | 1891.3 | 1889.9 | 1896.5 | 1896.5 | 1896.5 | 1896.5 | 1894.7 | 1894.7 | 1894.7 |
| gdb 1674 | 1893.9 <sup>a</sup> | 1882.9 | 1883.3 | 1889.0 | 1886.9 | 1888.1 | 1889.6 | 1895.1 | 1895.1 | 1895.5 | 1895.5 | 1891.4 | 1891.4 | 1891.4 |
| gdb 1675 | 1896.3 <sup>a</sup> | 1898.0 | 1898.3 | 1900.5 | 1900.2 | 1898.3 | 1900.8 | 1903.4 | 1903.4 | 1903.4 | 1903.4 | 1904.1 | 1904.1 | 1904.1 |
| gdb 1676 | 1871.9 <sup>a</sup> | 1887.3 | 1870.5 | 1883.9 | 1885.0 | 1879.4 | 1870.9 | 1874.0 | 1874.0 | 1874.0 | 1874.0 | 1871.4 | 1871.4 | 1871.4 |
| gdb 1677 | 1871.2 <sup>a</sup> | 1885.0 | 1869.8 | 1884.0 | 1884.0 | 1877.9 | 1868.4 | 1872.7 | 1872.7 | 1872.7 | 1872.7 | 1870.4 | 1870.4 | 1870.4 |
| gdb 1678 | 1874.0 <sup>a</sup> | 1886.9 | 1868.2 | 1884.6 | 1885.7 | 1880.8 | 1872.0 | 1876.5 | 1876.5 | 1876.5 | 1876.5 | 1873.9 | 1873.9 | 1873.9 |
| gdb 1679 | 1876.7 <sup>a</sup> | 1901.3 | 1885.7 | 1896.1 | 1893.2 | 1889.5 | 1884.9 | 1885.9 | 1885.9 | 1885.9 | 1885.9 | 1885.5 | 1885.5 | 1885.5 |
| gdb 1680 | 1847.4 <sup>a</sup> | 1829.8 | 1814.3 | 1832.4 | 1844.6 | 1833.4 | 1831.2 | 1840.1 | 1840.1 | 1840.1 | 1840.1 | 1838.8 | 1838.8 | 1838.7 |
| gdb 1681 | 1875.2 <sup>a</sup> | 1846.6 | 1829.4 | 1846.0 | 1861.1 | 1849.9 | 1848.3 | 1855.2 | 1855.2 | 1855.2 | 1855.2 | 1853.5 | 1853.5 | 1853.5 |
| gdb 1682 | 1862.3 <sup>a</sup> | 1847.6 | 1828.8 | 1845.1 | 1853.0 | 1844.2 | 1847.1 | 1850.3 | 1850.3 | 1850.3 | 1850.3 | 1853.5 | 1853.5 | 1853.5 |
| gdb 1683 | 1863.6 <sup>a</sup> | 1862.2 | 1850.3 | 1862.3 | 1867.4 | 1860.6 | 1851.3 | 1853.2 | 1853.1 | 1853.1 | 1853.1 | 1853.9 | 1853.9 | 1853.9 |
| gdb 1684 | 1882.9 <sup>a</sup> | 1877.6 | 1866.2 | 1877.0 | 1886.0 | 1879.2 | 1870.6 | 1871.2 | 1871.2 | 1871.2 | 1871.2 | 1870.1 | 1870.1 | 1870.1 |
| gdb 1685 | 1870.2 <sup>a</sup> | 1878.9 | 1866.9 | 1876.6 | 1879.3 | 1874.7 | 1869.9 | 1868.6 | 1868.5 | 1868.5 | 1868.5 | 1871.7 | 1871.7 | 1871.6 |
| gdb 1686 | 1898.9 <sup>a</sup> | 1903.6 | 1900.3 | 1912.3 | 1910.8 | 1907.3 | 1900.8 | 1906.5 | 1906.5 | 1906.5 | 1906.5 | 1909.6 | 1909.6 | 1909.6 |
| gdb 1687 | 1893.7 <sup>a</sup> | 1890.4 | 1888.6 | 1895.2 | 1892.8 | 1891.9 | 1895.7 | 1898.5 | 1898.5 | 1898.5 | 1898.5 | 1900.1 | 1900.1 | 1900.1 |
| gdb 1688 | 1889.6 <sup>a</sup> | 1877.6 | 1868.8 | 1878.5 | 1891.8 | 1883.6 | 1878.3 | 1882.5 | 1882.4 | 1882.4 | 1882.5 | 1879.6 | 1879.6 | 1879.6 |
| gdb 1689 | 1869.4 <sup>a</sup> | 1862.4 | 1852.9 | 1865.5 | 1868.9 | 1866.3 | 1862.6 | 1868.1 | 1868.1 | 1868.1 | 1868.1 | 1864.4 | 1864.3 | 1864.3 |
| gdb 1690 | 1868.9 <sup>a</sup> | 1859.8 | 1847.3 | 1861.8 | 1871.5 | 1864.7 | 1856.7 | 1860.9 | 1860.9 | 1860.9 | 1860.9 | 1861.1 | 1861.0 | 1861.0 |
| gdb 1691 | 1877.2 <sup>a</sup> | 1878.6 | 1869.2 | 1878.5 | 1883.7 | 1878.4 | 1876.8 | 1878.9 | 1878.8 | 1878.8 | 1878.8 | 1880.3 | 1880.3 | 1880.3 |
| gdb 1692 | 1915.5 <sup>a</sup> | 1902.2 | 1911.7 | 1912.0 | 1919.6 | 1916.9 | 1910.3 | 1915.9 | 1915.9 | 1915.9 | 1915.9 | 1912.6 | 1912.5 | 1912.5 |
| gdb 1693 | 1902.2 <sup>a</sup> | 1903.8 | 1910.8 | 1911.0 | 1910.6 | 1910.6 | 1908.1 | 1911.2 | 1911.1 | 1911.2 | 1911.2 | 1912.4 | 1912.4 | 1912.4 |
| gdb 1694 | 1898.6 <sup>a</sup> | 1905.3 | 1899.4 | 1911.0 | 1907.6 | 1905.9 | 1902.5 | 1906.8 | 1906.8 | 1906.8 | 1906.8 | 1909.4 | 1909.4 | 1909.4 |
| gdb 1695 | 1897.3 <sup>a</sup> | 1894.7 | 1896.4 | 1899.9 | 1903.2 | 1902.0 | 1898.1 | 1905.4 | 1905.4 | 1905.4 | 1905.4 | 1903.2 | 1903.2 | 1903.2 |
| gdb 1696 | 1915.2 <sup>a</sup> | 1903.9 | 1908.3 | 1910.1 | 1916.3 | 1914.0 | 1909.4 | 1913.5 | 1913.5 | 1913.5 | 1913.5 | 1910.3 | 1910.3 | 1910.3 |
| gdb 1697 | 1903.3 <sup>a</sup> | 1906.2 | 1910.2 | 1910.6 | 1910.1 | 1910.1 | 1909.2 | 1911.3 | 1911.3 | 1911.3 | 1911.3 | 1912.3 | 1912.3 | 1912.3 |
| gdb 1698 | 1880.7 <sup>a</sup> | 1879.9 | 1876.8 | 1876.9 | 1884.0 | 1882.8 | 1879.7 | 1883.6 | 1883.6 | 1883.6 | 1883.6 | 1878.2 | 1878.2 | 1878.2 |
| gdb 1699 | 1841.8 <sup>a</sup> | 1853.9 | 1846.4 | 1851.2 | 1853.7 | 1846.5 | 1835.3 | 1841.8 | 1841.8 | 1841.8 | 1841.8 | 1835.1 | 1835.1 | 1835.1 |
| gdb 1700 | 1851.3 <sup>a</sup> | 1867.3 | 1861.5 | 1863.4 | 1861.6 | 1855.4 | 1847.1 | 1849.4 | 1849.4 | 1849.4 | 1849.4 | 1846.7 | 1846.7 | 1846.7 |
| gdb 1701 | 1917.7 <sup>a</sup> | 1915.7 | 1922.5 | 1927.1 | 1921.7 | 1923.1 | 1922.5 | 1929.9 | 1929.9 | 1929.9 | 1929.9 | 1931.9 | 1931.9 | 1931.9 |
| gdb 1702 | 1892.5 <sup>a</sup> | 1903.2 | 1895.0 | 1906.8 | 1897.7 | 1899.8 | 1900.0 | 1903.7 | 1903.7 | 1903.7 | 1903.7 | 1904.2 | 1904.2 | 1904.2 |
| gdb 1703 | 1873.8 <sup>a</sup> | 1881.1 | 1863.5 | 1877.3 | 1877.1 | 1875.5 | 1873.2 | 1877.9 | 1877.8 | 1877.8 | 1877.8 | 1872.8 | 1872.8 | 1872.8 |
| gdb 1704 | 1868.8 <sup>a</sup> | 1879.0 | 1858.6 | 1874.4 | 1877.2 | 1872.1 | 1865.1 | 1868.3 | 1868.3 | 1868.3 | 1868.3 | 1867.7 | 1867.7 | 1867.7 |
| gdb 1705 | 1871.5 <sup>a</sup> | 1880.8 | 1860.7 | 1875.4 | 1880.3 | 1874.8 | 1870.1 | 1875.1 | 1875.0 | 1875.1 | 1875.1 | 1872.5 | 1872.5 | 1872.5 |
| gdb 1706 | 1880.2 <sup>a</sup> | 1893.2 | 1876.1 | 1887.4 | 1887.6 | 1883.9 | 1883.0 | 1885.4 | 1885.4 | 1885.5 | 1885.5 | 1885.4 | 1885.4 | 1885.4 |
| gdb 1707 | 1876.3 <sup>a</sup> | 1880.0 | 1865.6 | 1876.8 | 1882.4 | 1879.1 | 1874.5 | 1879.9 | 1879.9 | 1879.9 | 1879.9 | 1875.5 | 1875.5 | 1875.5 |
| gdb 1708 | 1896.6 <sup>a</sup> | 1888.0 | 1870.6 | 1883.1 | 1895.0 | 1886.2 | 1880.3 | 1884.7 | 1884.7 | 1884.7 | 1884.7 | 1882.0 | 1882.0 | 1882.0 |
| gdb 1709 | 1877.7 <sup>a</sup> | 1880.5 | 1861.8 | 1874.7 | 1883.9 | 1877.6 | 1872.1 | 1878.2 | 1878.1 | 1878.2 | 1878.2 | 1876.4 | 1876.4 | 1876.4 |

... continued on next page ...

Table S26: . . . continued from previous page. . . .

| Molecule | Ref.                | MNDO   | AMI    | PM3    | PM6    | PM7    | OM1    |        | OM2    |        | OM3    |        | OM3    |        |
|----------|---------------------|--------|--------|--------|--------|--------|--------|--------|--------|--------|--------|--------|--------|--------|
|          |                     |        |        |        |        |        | OM1    | OM2    | D2     | D3     | D2     | D3     | D2     | D3     |
| gdb 1710 | 1882.1 <sup>a</sup> | 1893.6 | 1877.5 | 1887.9 | 1894.0 | 1888.7 | 1886.7 | 1889.2 | 1889.2 | 1889.2 | 1889.6 | 1889.6 | 1889.6 | 1889.6 |
| gdb 1711 | 1893.6 <sup>a</sup> | 1901.4 | 1897.5 | 1907.9 | 1898.4 | 1899.7 | 1901.8 | 1903.5 | 1903.5 | 1903.5 | 1904.5 | 1904.5 | 1904.5 | 1904.5 |
| gdb 1712 | 1894.9 <sup>a</sup> | 1885.0 | 1883.5 | 1888.7 | 1887.3 | 1888.5 | 1890.3 | 1895.0 | 1895.0 | 1895.0 | 1890.4 | 1890.4 | 1890.4 | 1890.3 |
| gdb 1713 | 1885.0 <sup>a</sup> | 1884.0 | 1883.8 | 1888.8 | 1890.8 | 1887.6 | 1889.4 | 1890.4 | 1890.4 | 1890.4 | 1888.8 | 1888.8 | 1888.8 | 1888.8 |
| gdb 1714 | 1891.8 <sup>a</sup> | 1887.4 | 1884.6 | 1889.6 | 1894.0 | 1891.2 | 1891.9 | 1899.2 | 1899.2 | 1899.2 | 1896.5 | 1896.5 | 1896.5 | 1896.5 |
| gdb 1715 | 1900.0 <sup>a</sup> | 1898.0 | 1897.1 | 1899.2 | 1898.7 | 1896.8 | 1900.9 | 1902.8 | 1902.8 | 1902.8 | 1903.4 | 1903.4 | 1903.4 | 1903.4 |
| gdb 1716 | 1874.2 <sup>a</sup> | 1869.0 | 1861.7 | 1865.5 | 1875.9 | 1873.2 | 1868.9 | 1877.0 | 1876.9 | 1876.9 | 1868.1 | 1868.1 | 1868.1 | 1868.1 |
| gdb 1717 | 1879.7 <sup>a</sup> | 1881.3 | 1875.4 | 1875.8 | 1882.6 | 1881.4 | 1879.2 | 1882.7 | 1882.7 | 1882.7 | 1876.9 | 1876.9 | 1876.9 | 1876.9 |
| gdb 1718 | 1897.9 <sup>a</sup> | 1896.7 | 1901.9 | 1901.7 | 1903.1 | 1903.6 | 1898.5 | 1904.3 | 1904.3 | 1904.3 | 1901.6 | 1901.6 | 1901.6 | 1901.6 |
| gdb 1719 | 1909.0 <sup>a</sup> | 1908.6 | 1914.5 | 1911.1 | 1910.0 | 1908.5 | 1908.9 | 1909.7 | 1909.7 | 1909.7 | 1910.7 | 1910.7 | 1910.7 | 1910.7 |
| gdb 1720 | 1840.6 <sup>a</sup> | 1842.5 | 1835.9 | 1837.3 | 1837.7 | 1835.6 | 1835.3 | 1837.3 | 1837.3 | 1837.3 | 1829.5 | 1829.5 | 1829.5 | 1829.5 |
| gdb 1721 | 1843.9 <sup>a</sup> | 1854.3 | 1848.1 | 1847.1 | 1852.1 | 1843.1 | 1844.7 | 1842.4 | 1842.4 | 1842.4 | 1841.1 | 1841.1 | 1841.1 | 1841.1 |
| gdb 1722 | 1918.8 <sup>a</sup> | 1918.1 | 1921.7 | 1925.9 | 1919.7 | 1922.2 | 1924.1 | 1930.1 | 1930.1 | 1930.1 | 1931.4 | 1931.4 | 1931.4 | 1931.4 |
| gdb 1723 | 1896.5 <sup>a</sup> | 1896.9 | 1904.6 | 1902.5 | 1901.6 | 1901.7 | 1895.4 | 1901.1 | 1901.1 | 1901.1 | 1898.2 | 1898.2 | 1898.2 | 1898.2 |
| gdb 1724 | 1898.2 <sup>a</sup> | 1898.7 | 1902.3 | 1902.0 | 1903.1 | 1903.8 | 1899.3 | 1905.1 | 1905.1 | 1905.1 | 1902.0 | 1902.0 | 1902.0 | 1902.0 |
| gdb 1725 | 1908.2 <sup>a</sup> | 1909.3 | 1914.0 | 1910.6 | 1906.3 | 1908.0 | 1907.9 | 1910.1 | 1910.1 | 1910.1 | 1910.5 | 1910.5 | 1910.5 | 1910.5 |
| gdb 1726 | 1866.7 <sup>a</sup> | 1868.9 | 1876.8 | 1872.2 | 1876.1 | 1869.4 | 1858.9 | 1871.0 | 1871.0 | 1871.0 | 1861.2 | 1861.2 | 1861.2 | 1861.2 |
| gdb 1727 | 1862.5 <sup>a</sup> | 1870.1 | 1870.4 | 1867.6 | 1870.0 | 1865.2 | 1854.4 | 1865.1 | 1865.1 | 1865.1 | 1858.1 | 1858.1 | 1858.1 | 1858.1 |
| gdb 1728 | 1867.9 <sup>a</sup> | 1870.1 | 1881.0 | 1873.6 | 1874.1 | 1868.2 | 1856.7 | 1868.0 | 1868.0 | 1868.0 | 1858.5 | 1858.5 | 1858.5 | 1858.5 |
| gdb 1729 | 1864.6 <sup>a</sup> | 1869.4 | 1871.6 | 1870.2 | 1874.5 | 1869.4 | 1860.3 | 1871.1 | 1871.1 | 1871.1 | 1862.2 | 1862.2 | 1862.2 | 1862.2 |
| gdb 1730 | 1872.5 <sup>a</sup> | 1876.7 | 1883.7 | 1877.7 | 1878.8 | 1874.4 | 1868.7 | 1875.7 | 1875.7 | 1875.7 | 1871.1 | 1871.1 | 1871.1 | 1871.1 |
| gdb 1731 | 1873.7 <sup>a</sup> | 1876.0 | 1884.2 | 1878.2 | 1880.7 | 1875.3 | 1868.9 | 1877.0 | 1877.0 | 1877.0 | 1872.5 | 1872.5 | 1872.5 | 1872.5 |
| gdb 1732 | 1848.3 <sup>a</sup> | 1845.1 | 1811.3 | 1835.5 | 1847.1 | 1833.4 | 1821.6 | 1830.9 | 1830.9 | 1830.9 | 1831.1 | 1831.1 | 1831.1 | 1831.0 |
| gdb 1733 | 1859.9 <sup>a</sup> | 1860.0 | 1828.7 | 1850.2 | 1857.8 | 1845.6 | 1839.0 | 1846.6 | 1846.6 | 1846.6 | 1848.6 | 1848.6 | 1848.6 | 1848.6 |
| gdb 1734 | 1857.2 <sup>a</sup> | 1849.7 | 1818.3 | 1840.1 | 1856.3 | 1842.9 | 1829.4 | 1839.4 | 1839.4 | 1839.4 | 1838.6 | 1838.6 | 1838.6 | 1838.6 |
| gdb 1735 | 1872.4 <sup>a</sup> | 1881.5 | 1858.6 | 1870.7 | 1878.4 | 1867.8 | 1857.6 | 1865.9 | 1865.9 | 1865.9 | 1864.5 | 1864.5 | 1864.5 | 1864.5 |
| gdb 1736 | 1864.5 <sup>a</sup> | 1867.5 | 1842.1 | 1858.2 | 1870.0 | 1859.4 | 1841.5 | 1852.8 | 1852.8 | 1852.8 | 1849.4 | 1849.4 | 1849.4 | 1849.4 |
| gdb 1737 | 1874.3 <sup>a</sup> | 1880.4 | 1857.7 | 1870.4 | 1879.1 | 1868.3 | 1861.8 | 1870.6 | 1870.6 | 1870.6 | 1869.5 | 1869.5 | 1869.5 | 1869.5 |
| gdb 1738 | 1870.9 <sup>a</sup> | 1879.6 | 1857.5 | 1870.1 | 1875.7 | 1864.8 | 1855.3 | 1863.4 | 1863.4 | 1863.4 | 1862.7 | 1862.7 | 1862.7 | 1862.7 |
| gdb 1739 | 1873.3 <sup>a</sup> | 1878.0 | 1852.5 | 1867.7 | 1875.0 | 1864.3 | 1855.4 | 1861.6 | 1861.6 | 1861.6 | 1862.0 | 1862.0 | 1862.0 | 1862.0 |
| gdb 1740 | 1881.0 <sup>a</sup> | 1893.7 | 1870.9 | 1881.7 | 1883.8 | 1874.0 | 1872.2 | 1874.8 | 1874.7 | 1874.7 | 1877.2 | 1877.2 | 1877.2 | 1877.2 |
| gdb 1741 | 1847.2 <sup>a</sup> | 1846.5 | 1812.6 | 1835.8 | 1847.1 | 1832.5 | 1821.1 | 1831.6 | 1831.6 | 1831.6 | 1831.2 | 1831.2 | 1831.2 | 1831.2 |
| gdb 1742 | 1858.3 <sup>a</sup> | 1860.6 | 1828.3 | 1850.1 | 1858.1 | 1845.2 | 1837.2 | 1843.9 | 1843.9 | 1843.9 | 1846.6 | 1846.6 | 1846.6 | 1846.6 |
| gdb 1743 | 1851.0 <sup>a</sup> | 1849.7 | 1814.7 | 1837.4 | 1853.6 | 1840.0 | 1825.2 | 1835.3 | 1835.3 | 1835.3 | 1834.7 | 1834.7 | 1834.7 | 1834.7 |
| gdb 1744 | 1873.7 <sup>a</sup> | 1893.8 | 1871.9 | 1883.3 | 1894.0 | 1882.5 | 1866.7 | 1875.2 | 1875.2 | 1875.2 | 1869.6 | 1869.6 | 1869.6 | 1869.6 |
| gdb 1745 | 1876.9 <sup>a</sup> | 1907.7 | 1886.5 | 1895.6 | 1899.8 | 1889.3 | 1880.2 | 1885.1 | 1885.1 | 1885.1 | 1881.3 | 1881.3 | 1881.3 | 1881.3 |
| gdb 1746 | 1878.4 <sup>a</sup> | 1904.9 | 1881.3 | 1891.9 | 1895.9 | 1885.8 | 1877.2 | 1880.2 | 1880.2 | 1880.2 | 1877.4 | 1877.4 | 1877.4 | 1877.4 |
| gdb 1747 | 1869.7 <sup>a</sup> | 1881.9 | 1866.2 | 1870.1 | 1883.1 | 1872.1 | 1858.1 | 1865.0 | 1865.0 | 1865.0 | 1858.2 | 1858.2 | 1858.2 | 1858.2 |
| gdb 1748 | 1860.6 <sup>a</sup> | 1874.2 | 1853.6 | 1861.3 | 1872.3 | 1861.2 | 1844.8 | 1848.8 | 1848.8 | 1848.8 | 1846.0 | 1846.0 | 1846.0 | 1846.0 |
| gdb 1749 | 1861.4 <sup>a</sup> | 1873.8 | 1853.0 | 1861.8 | 1874.0 | 1862.9 | 1844.5 | 1848.6 | 1848.6 | 1848.6 | 1845.8 | 1845.8 | 1845.8 | 1845.8 |
| gdb 1750 | 1870.5 <sup>a</sup> | 1886.9 | 1867.3 | 1873.1 | 1879.2 | 1869.5 | 1861.8 | 1861.8 | 1861.8 | 1861.8 | 1862.2 | 1862.2 | 1862.2 | 1862.2 |
| gdb 1751 | 1868.3 <sup>a</sup> | 1886.1 | 1868.7 | 1873.5 | 1880.7 | 1869.6 | 1860.2 | 1861.4 | 1861.4 | 1861.4 | 1861.4 | 1861.4 | 1861.4 | 1861.4 |
| gdb 1752 | 1871.1 <sup>a</sup> | 1887.5 | 1869.3 | 1874.8 | 1882.3 | 1871.7 | 1863.5 | 1865.1 | 1865.1 | 1865.1 | 1864.9 | 1864.9 | 1864.9 | 1864.9 |
| gdb 1753 | 1869.9 <sup>a</sup> | 1884.3 | 1861.5 | 1868.3 | 1875.6 | 1865.2 | 1857.3 | 1856.3 | 1856.3 | 1856.3 | 1857.6 | 1857.6 | 1857.6 | 1857.6 |
| gdb 1754 | 1884.1 <sup>a</sup> | 1892.9 | 1883.5 | 1885.7 | 1896.0 | 1886.7 | 1877.4 | 1886.8 | 1886.8 | 1886.8 | 1882.6 | 1882.6 | 1882.6 | 1882.6 |

. . . continued on next page . . .

Table S26: ... continued from previous page ...

| Molecule | Ref.                | MNDO   | AMI    | PM3    | PM6    | PM7    | OM1    | OM2    |        | OM3    |        | D3     | D3T    |
|----------|---------------------|--------|--------|--------|--------|--------|--------|--------|--------|--------|--------|--------|--------|
|          |                     |        |        |        |        |        |        | D2     | D3     | D2     | D3     |        |        |
| gdb 1755 | 1891.7 <sup>a</sup> | 1898.9 | 1892.6 | 1892.5 | 1903.8 | 1892.8 | 1885.5 | 1896.9 | 1896.8 | 1896.8 | 1889.4 | 1889.3 | 1889.3 |
| gdb 1756 | 1879.1 <sup>a</sup> | 1891.3 | 1880.3 | 1883.8 | 1889.8 | 1881.0 | 1871.2 | 1879.7 | 1879.6 | 1879.7 | 1875.9 | 1875.9 | 1875.9 |
| gdb 1757 | 1887.7 <sup>a</sup> | 1902.3 | 1891.1 | 1893.2 | 1895.8 | 1887.9 | 1885.0 | 1888.0 | 1887.9 | 1887.9 | 1888.1 | 1888.1 | 1888.1 |
| gdb 1758 | 1890.2 <sup>a</sup> | 1903.4 | 1893.3 | 1894.7 | 1900.1 | 1891.7 | 1889.2 | 1893.1 | 1893.1 | 1893.1 | 1892.8 | 1892.8 | 1892.8 |
| gdb 1759 | 1901.0 <sup>a</sup> | 1913.8 | 1901.1 | 1910.3 | 1917.2 | 1909.6 | 1901.5 | 1909.8 | 1909.8 | 1909.8 | 1908.5 | 1908.4 | 1908.4 |
| gdb 1760 | 1898.0 <sup>a</sup> | 1911.8 | 1902.5 | 1910.0 | 1914.1 | 1905.9 | 1896.7 | 1905.0 | 1905.0 | 1905.0 | 1903.7 | 1903.6 | 1903.6 |
| gdb 1761 | 1895.7 <sup>a</sup> | 1911.9 | 1900.3 | 1909.4 | 1911.7 | 1904.5 | 1896.7 | 1905.0 | 1905.0 | 1905.0 | 1903.2 | 1903.2 | 1903.2 |
| gdb 1762 | 1925.4 <sup>a</sup> | 1918.0 | 1903.8 | 1915.0 | 1922.4 | 1914.5 | 1908.1 | 1912.7 | 1912.7 | 1912.7 | 1911.4 | 1911.4 | 1911.4 |
| gdb 1763 | 1905.9 <sup>a</sup> | 1923.3 | 1912.3 | 1919.2 | 1921.1 | 1914.8 | 1910.4 | 1914.3 | 1914.3 | 1914.3 | 1916.0 | 1916.0 | 1916.0 |
| gdb 1764 | 1912.0 <sup>a</sup> | 1888.2 | 1869.7 | 1888.7 | 1901.3 | 1891.8 | 1884.3 | 1900.8 | 1900.8 | 1900.8 | 1898.2 | 1898.2 | 1898.2 |
| gdb 1765 | 1898.3 <sup>a</sup> | 1881.6 | 1862.0 | 1882.0 | 1894.5 | 1886.8 | 1876.8 | 1894.6 | 1894.6 | 1894.6 | 1892.2 | 1892.2 | 1892.2 |
| gdb 1766 | 1905.1 <sup>a</sup> | 1895.8 | 1878.6 | 1894.6 | 1895.9 | 1889.6 | 1885.4 | 1897.0 | 1897.0 | 1897.0 | 1898.5 | 1898.5 | 1898.5 |
| gdb 1767 | 1903.4 <sup>a</sup> | 1895.4 | 1878.3 | 1894.5 | 1897.8 | 1890.8 | 1886.1 | 1898.4 | 1898.4 | 1898.4 | 1899.6 | 1899.6 | 1899.6 |
| gdb 1768 | 1862.1 <sup>a</sup> | 1837.2 | 1815.0 | 1834.4 | 1854.5 | 1846.6 | 1836.4 | 1854.5 | 1854.5 | 1854.5 | 1846.1 | 1846.1 | 1846.1 |
| gdb 1769 | 1866.5 <sup>a</sup> | 1852.1 | 1831.3 | 1846.9 | 1856.8 | 1849.6 | 1844.8 | 1856.9 | 1856.9 | 1856.9 | 1852.1 | 1852.1 | 1852.1 |
| gdb 1770 | 1870.8 <sup>a</sup> | 1864.4 | 1842.7 | 1858.7 | 1866.3 | 1854.8 | 1852.4 | 1861.4 | 1861.4 | 1861.4 | 1862.2 | 1862.2 | 1862.2 |
| gdb 1771 | 1837.4 <sup>a</sup> | 1823.5 | 1776.6 | 1805.0 | 1825.7 | 1811.7 | 1805.2 | 1819.6 | 1819.6 | 1819.6 | 1812.7 | 1812.7 | 1812.7 |
| gdb 1772 | 1847.6 <sup>a</sup> | 1840.7 | 1791.7 | 1817.2 | 1829.5 | 1815.7 | 1813.0 | 1824.3 | 1824.3 | 1824.3 | 1822.1 | 1822.1 | 1822.1 |
| gdb 1773 | 1848.7 <sup>a</sup> | 1850.2 | 1802.4 | 1826.4 | 1839.0 | 1821.4 | 1823.7 | 1828.5 | 1828.5 | 1828.5 | 1831.5 | 1831.5 | 1831.5 |
| gdb 1774 | 1861.0 <sup>a</sup> | 1846.3 | 1815.8 | 1839.1 | 1854.6 | 1841.4 | 1837.1 | 1849.1 | 1849.1 | 1849.1 | 1848.6 | 1848.6 | 1848.6 |
| gdb 1775 | 1869.6 <sup>a</sup> | 1862.6 | 1830.5 | 1851.2 | 1856.3 | 1843.5 | 1846.0 | 1852.6 | 1852.6 | 1852.6 | 1855.8 | 1855.1 | 1855.1 |
| gdb 1776 | 1894.9 <sup>a</sup> | 1899.3 | 1890.7 | 1895.8 | 1901.1 | 1894.7 | 1886.4 | 1895.2 | 1895.2 | 1895.2 | 1893.9 | 1893.9 | 1893.9 |
| gdb 1777 | 1889.5 <sup>a</sup> | 1880.8 | 1860.6 | 1878.0 | 1887.8 | 1879.6 | 1872.6 | 1887.6 | 1887.6 | 1887.6 | 1886.1 | 1886.1 | 1886.1 |
| gdb 1778 | 1900.0 <sup>a</sup> | 1896.0 | 1876.3 | 1892.4 | 1893.2 | 1886.6 | 1885.2 | 1894.3 | 1894.3 | 1894.3 | 1895.9 | 1895.9 | 1895.9 |
| gdb 1779 | 1895.7 <sup>a</sup> | 1882.8 | 1861.0 | 1880.5 | 1890.6 | 1883.1 | 1877.1 | 1893.2 | 1893.2 | 1893.2 | 1890.2 | 1890.2 | 1890.2 |
| gdb 1780 | 1836.0 <sup>a</sup> | 1820.8 | 1782.8 | 1804.3 | 1825.6 | 1812.3 | 1807.4 | 1817.8 | 1817.8 | 1817.8 | 1810.7 | 1810.6 | 1810.6 |
| gdb 1781 | 1846.5 <sup>a</sup> | 1837.8 | 1798.3 | 1816.8 | 1828.9 | 1815.9 | 1817.4 | 1821.9 | 1821.9 | 1821.9 | 1818.8 | 1818.8 | 1818.8 |
| gdb 1782 | 1886.3 <sup>a</sup> | 1877.9 | 1863.3 | 1876.8 | 1881.7 | 1875.6 | 1872.2 | 1883.6 | 1883.6 | 1883.6 | 1881.7 | 1881.7 | 1881.7 |
| gdb 1783 | 1884.9 <sup>a</sup> | 1877.6 | 1862.9 | 1876.7 | 1880.2 | 1874.6 | 1871.6 | 1883.2 | 1883.2 | 1883.2 | 1880.8 | 1880.8 | 1880.8 |
| gdb 1784 | 1889.9 <sup>a</sup> | 1879.2 | 1862.0 | 1878.4 | 1883.0 | 1878.1 | 1875.5 | 1887.2 | 1887.1 | 1887.1 | 1884.1 | 1884.1 | 1884.1 |
| gdb 1785 | 1895.5 <sup>a</sup> | 1892.5 | 1878.2 | 1890.6 | 1886.5 | 1882.1 | 1884.1 | 1890.3 | 1890.3 | 1890.3 | 1890.9 | 1890.9 | 1890.9 |
| gdb 1786 | 1896.0 <sup>a</sup> | 1896.3 | 1890.1 | 1897.7 | 1906.4 | 1901.2 | 1890.8 | 1902.9 | 1902.9 | 1902.9 | 1900.3 | 1900.3 | 1900.3 |
| gdb 1787 | 1912.4 <sup>a</sup> | 1905.2 | 1901.0 | 1909.2 | 1914.6 | 1906.8 | 1898.7 | 1908.8 | 1908.8 | 1908.8 | 1904.6 | 1904.5 | 1904.5 |
| gdb 1788 | 1900.9 <sup>a</sup> | 1897.6 | 1888.0 | 1897.6 | 1906.6 | 1901.5 | 1891.1 | 1902.1 | 1902.1 | 1902.1 | 1899.4 | 1899.4 | 1899.4 |
| gdb 1789 | 1906.6 <sup>a</sup> | 1910.1 | 1903.9 | 1909.4 | 1913.7 | 1908.9 | 1903.3 | 1910.4 | 1910.4 | 1910.4 | 1911.0 | 1911.0 | 1911.0 |
| gdb 1790 | 1884.8 <sup>a</sup> | 1873.9 | 1860.8 | 1874.1 | 1882.6 | 1873.5 | 1871.5 | 1881.9 | 1881.9 | 1881.9 | 1880.3 | 1880.3 | 1880.3 |
| gdb 1791 | 1889.0 <sup>a</sup> | 1876.6 | 1864.9 | 1878.1 | 1885.0 | 1879.2 | 1875.8 | 1886.5 | 1886.5 | 1886.5 | 1883.9 | 1883.9 | 1883.9 |
| gdb 1792 | 1892.9 <sup>a</sup> | 1888.9 | 1878.2 | 1888.9 | 1885.9 | 1881.5 | 1883.7 | 1889.0 | 1889.0 | 1889.0 | 1890.4 | 1890.4 | 1890.4 |
| gdb 1793 | 1866.8 <sup>a</sup> | 1853.7 | 1828.0 | 1845.8 | 1860.2 | 1852.4 | 1844.2 | 1857.0 | 1857.0 | 1857.0 | 1848.7 | 1848.7 | 1848.7 |
| gdb 1794 | 1874.3 <sup>a</sup> | 1867.3 | 1843.7 | 1858.5 | 1865.1 | 1858.1 | 1855.3 | 1862.8 | 1862.8 | 1862.8 | 1858.1 | 1858.1 | 1858.1 |
| gdb 1795 | 1875.0 <sup>a</sup> | 1867.0 | 1851.8 | 1861.6 | 1874.6 | 1869.1 | 1858.2 | 1867.4 | 1867.4 | 1867.4 | 1859.0 | 1859.0 | 1859.0 |
| gdb 1796 | 1881.6 <sup>a</sup> | 1878.5 | 1867.6 | 1872.9 | 1883.3 | 1877.3 | 1871.6 | 1877.4 | 1877.4 | 1877.4 | 1872.0 | 1872.0 | 1872.0 |
| gdb 1797 | 1856.8 <sup>a</sup> | 1836.7 | 1823.5 | 1836.0 | 1861.8 | 1850.8 | 1836.7 | 1853.3 | 1853.3 | 1853.3 | 1845.8 | 1845.8 | 1845.8 |
| gdb 1798 | 1859.2 <sup>a</sup> | 1845.9 | 1833.2 | 1846.6 | 1862.8 | 1851.2 | 1841.8 | 1855.0 | 1855.0 | 1855.0 | 1850.8 | 1850.8 | 1850.8 |
| gdb 1799 | 1868.0 <sup>a</sup> | 1861.0 | 1836.0 | 1852.2 | 1867.5 | 1856.4 | 1843.4 | 1854.5 | 1854.5 | 1854.5 | 1848.4 | 1848.4 | 1848.4 |

... continued on next page ...

Table S26: . . . continued from previous page . . .

| Molecule | Ref.                | MNDO   | AMI    | PM3    | PM6    | PM7    | OM1    | OM2    |        | OM3    |        | D3     | D3T    | D3T    |
|----------|---------------------|--------|--------|--------|--------|--------|--------|--------|--------|--------|--------|--------|--------|--------|
|          |                     |        |        |        |        |        | PM3    | PM6    | PM7    | OM1    | OM2    |        |        |        |
| gdb 1800 | 1866.6 <sup>a</sup> | 1857.6 | 1835.0 | 1851.1 | 1869.1 | 1856.2 | 1842.2 | 1854.1 | 1854.1 | 1854.1 | 1847.7 | 1847.7 | 1847.7 | 1847.7 |
| gdb 1801 | 1873.2 <sup>a</sup> | 1872.8 | 1850.7 | 1864.0 | 1871.6 | 1860.8 | 1853.4 | 1859.5 | 1859.5 | 1859.5 | 1857.0 | 1857.0 | 1857.0 | 1857.0 |
| gdb 1802 | 1873.0 <sup>a</sup> | 1872.0 | 1850.0 | 1863.5 | 1871.7 | 1860.7 | 1852.5 | 1859.0 | 1859.0 | 1859.0 | 1856.2 | 1856.2 | 1856.2 | 1856.2 |
| gdb 1803 | 1867.2 <sup>a</sup> | 1853.0 | 1827.7 | 1848.5 | 1851.3 | 1841.7 | 1844.5 | 1852.3 | 1852.3 | 1852.3 | 1854.6 | 1854.6 | 1854.5 | 1854.5 |
| gdb 1804 | 1869.7 <sup>a</sup> | 1855.2 | 1828.5 | 1847.2 | 1853.0 | 1844.2 | 1846.4 | 1854.1 | 1854.1 | 1854.1 | 1855.7 | 1855.7 | 1855.7 | 1855.7 |
| gdb 1805 | 1856.3 <sup>a</sup> | 1838.5 | 1813.6 | 1835.3 | 1848.8 | 1837.6 | 1835.0 | 1847.8 | 1847.8 | 1847.8 | 1845.9 | 1845.9 | 1845.9 | 1845.9 |
| gdb 1806 | 1837.4 <sup>a</sup> | 1835.1 | 1789.2 | 1815.9 | 1835.5 | 1818.2 | 1807.9 | 1818.0 | 1818.0 | 1818.0 | 1813.0 | 1813.0 | 1813.0 | 1813.0 |
| gdb 1807 | 1833.3 <sup>a</sup> | 1834.6 | 1791.5 | 1815.9 | 1837.3 | 1817.6 | 1806.9 | 1815.8 | 1815.8 | 1815.8 | 1811.5 | 1811.5 | 1811.5 | 1811.5 |
| gdb 1808 | 1850.6 <sup>a</sup> | 1850.3 | 1804.1 | 1828.4 | 1841.0 | 1824.0 | 1820.6 | 1825.2 | 1825.2 | 1825.2 | 1824.5 | 1824.5 | 1824.5 | 1824.5 |
| gdb 1809 | 1845.1 <sup>a</sup> | 1850.7 | 1806.2 | 1828.3 | 1840.7 | 1822.0 | 1818.0 | 1821.9 | 1821.9 | 1821.9 | 1821.5 | 1821.5 | 1821.5 | 1821.5 |
| gdb 1810 | 1831.7 <sup>a</sup> | 1816.6 | 1784.6 | 1802.9 | 1825.3 | 1811.5 | 1807.0 | 1814.8 | 1814.8 | 1814.9 | 1808.4 | 1808.2 | 1808.3 | 1808.3 |
| gdb 1811 | 1843.1 <sup>a</sup> | 1832.0 | 1798.5 | 1815.1 | 1827.8 | 1815.2 | 1818.0 | 1820.5 | 1820.5 | 1820.5 | 1817.9 | 1817.8 | 1817.8 | 1817.8 |
| gdb 1812 | 1878.5 <sup>a</sup> | 1858.3 | 1835.6 | 1850.4 | 1863.2 | 1851.2 | 1850.8 | 1854.5 | 1854.4 | 1854.4 | 1853.4 | 1853.4 | 1853.4 | 1853.4 |
| gdb 1813 | 1853.7 <sup>a</sup> | 1840.8 | 1817.6 | 1836.7 | 1849.3 | 1837.3 | 1835.1 | 1842.6 | 1842.5 | 1842.5 | 1842.9 | 1842.9 | 1842.9 | 1842.9 |
| gdb 1814 | 1868.6 <sup>a</sup> | 1857.3 | 1831.4 | 1848.9 | 1853.2 | 1844.2 | 1847.5 | 1850.0 | 1849.9 | 1849.9 | 1853.5 | 1853.5 | 1853.5 | 1853.5 |
| gdb 1815 | 1915.0 <sup>a</sup> | 1906.2 | 1900.8 | 1911.1 | 1920.2 | 1912.2 | 1903.2 | 1914.4 | 1914.4 | 1914.4 | 1910.7 | 1910.7 | 1910.7 | 1910.7 |
| gdb 1816 | 1913.3 <sup>a</sup> | 1905.7 | 1902.2 | 1911.9 | 1919.5 | 1910.8 | 1900.2 | 1911.7 | 1911.7 | 1911.7 | 1908.0 | 1908.0 | 1908.0 | 1908.0 |
| gdb 1817 | 1904.7 <sup>a</sup> | 1898.7 | 1891.2 | 1900.8 | 1913.9 | 1907.0 | 1894.0 | 1906.2 | 1906.2 | 1906.2 | 1904.0 | 1904.0 | 1904.0 | 1904.0 |
| gdb 1818 | 1907.3 <sup>a</sup> | 1910.4 | 1905.5 | 1911.4 | 1917.6 | 1911.7 | 1904.5 | 1913.0 | 1913.0 | 1913.0 | 1913.7 | 1913.7 | 1913.7 | 1913.7 |
| gdb 1819 | 1875.0 <sup>a</sup> | 1867.9 | 1851.8 | 1861.6 | 1874.6 | 1869.1 | 1858.6 | 1867.8 | 1867.7 | 1867.7 | 1859.4 | 1859.4 | 1859.4 | 1859.4 |
| gdb 1820 | 1881.0 <sup>a</sup> | 1879.9 | 1867.8 | 1873.4 | 1882.6 | 1876.8 | 1872.5 | 1877.8 | 1877.8 | 1877.8 | 1872.5 | 1872.5 | 1872.5 | 1872.5 |
| gdb 1821 | 1871.1 <sup>a</sup> | 1875.2 | 1863.8 | 1872.3 | 1886.0 | 1875.1 | 1863.7 | 1871.4 | 1871.4 | 1871.4 | 1869.3 | 1869.3 | 1869.2 | 1869.2 |
| gdb 1822 | 1867.2 <sup>a</sup> | 1852.7 | 1827.4 | 1845.3 | 1859.8 | 1852.3 | 1844.5 | 1857.4 | 1857.4 | 1857.4 | 1849.1 | 1849.1 | 1849.1 | 1849.1 |
| gdb 1823 | 1875.3 <sup>a</sup> | 1868.0 | 1844.0 | 1858.4 | 1864.1 | 1858.0 | 1856.9 | 1863.6 | 1863.6 | 1863.6 | 1859.0 | 1859.0 | 1859.0 | 1859.0 |
| gdb 1824 | 1866.5 <sup>a</sup> | 1862.3 | 1836.6 | 1853.2 | 1866.7 | 1856.2 | 1849.7 | 1858.2 | 1858.2 | 1858.2 | 1857.2 | 1857.2 | 1857.2 | 1857.2 |
| gdb 1825 | 1884.2 <sup>a</sup> | 1873.7 | 1863.9 | 1875.6 | 1882.4 | 1876.2 | 1871.8 | 1883.2 | 1883.2 | 1883.2 | 1881.3 | 1881.3 | 1881.2 | 1881.2 |
| gdb 1826 | 1889.2 <sup>a</sup> | 1875.8 | 1864.4 | 1877.6 | 1885.1 | 1879.3 | 1875.6 | 1886.6 | 1886.6 | 1886.6 | 1883.9 | 1883.9 | 1883.9 | 1883.9 |
| gdb 1827 | 1895.7 <sup>a</sup> | 1889.3 | 1879.7 | 1889.5 | 1888.1 | 1884.5 | 1886.0 | 1891.2 | 1891.2 | 1891.2 | 1892.1 | 1892.1 | 1892.1 | 1892.1 |
| gdb 1828 | 1912.4 <sup>a</sup> | 1905.0 | 1900.4 | 1908.6 | 1913.7 | 1906.5 | 1899.1 | 1909.1 | 1909.1 | 1909.1 | 1904.7 | 1904.7 | 1904.7 | 1904.7 |
| gdb 1829 | 1894.6 <sup>a</sup> | 1895.8 | 1891.1 | 1897.9 | 1904.8 | 1899.6 | 1888.4 | 1900.3 | 1900.3 | 1900.3 | 1897.6 | 1897.6 | 1897.6 | 1897.6 |
| gdb 1830 | 1901.2 <sup>a</sup> | 1897.7 | 1887.5 | 1896.7 | 1905.5 | 1901.2 | 1892.0 | 1902.2 | 1902.2 | 1902.2 | 1899.4 | 1899.4 | 1899.4 | 1899.4 |
| gdb 1831 | 1908.9 <sup>a</sup> | 1910.8 | 1904.0 | 1909.0 | 1910.9 | 1907.4 | 1903.5 | 1909.3 | 1909.3 | 1909.3 | 1910.0 | 1910.0 | 1910.0 | 1910.0 |
| gdb 1832 | 1877.8 <sup>a</sup> | 1893.4 | 1888.0 | 1888.6 | 1899.0 | 1891.2 | 1877.5 | 1883.3 | 1883.3 | 1883.3 | 1880.0 | 1880.0 | 1880.0 | 1880.0 |
| gdb 1833 | 1877.1 <sup>a</sup> | 1865.7 | 1850.6 | 1864.0 | 1871.5 | 1865.3 | 1861.7 | 1874.9 | 1874.8 | 1874.8 | 1874.1 | 1874.1 | 1874.1 | 1874.1 |
| gdb 1834 | 1872.5 <sup>a</sup> | 1853.8 | 1837.8 | 1853.8 | 1870.6 | 1862.7 | 1854.8 | 1873.2 | 1873.2 | 1873.2 | 1868.4 | 1868.3 | 1868.3 | 1868.3 |
| gdb 1835 | 1861.5 <sup>a</sup> | 1852.5 | 1825.8 | 1842.4 | 1856.9 | 1848.7 | 1842.1 | 1854.0 | 1854.0 | 1854.0 | 1846.7 | 1846.7 | 1846.7 | 1846.7 |
| gdb 1836 | 1861.0 <sup>a</sup> | 1852.9 | 1826.8 | 1842.4 | 1855.0 | 1846.6 | 1839.4 | 1851.3 | 1851.3 | 1851.3 | 1843.7 | 1843.7 | 1843.7 | 1843.7 |
| gdb 1837 | 1866.9 <sup>a</sup> | 1854.7 | 1826.5 | 1844.4 | 1858.3 | 1850.4 | 1844.7 | 1857.3 | 1857.3 | 1857.3 | 1848.4 | 1848.4 | 1848.4 | 1848.4 |
| gdb 1838 | 1868.7 <sup>a</sup> | 1867.4 | 1839.5 | 1855.2 | 1862.4 | 1853.6 | 1855.7 | 1858.3 | 1858.3 | 1858.3 | 1854.1 | 1854.1 | 1854.1 | 1854.1 |
| gdb 1839 | 1864.1 <sup>a</sup> | 1865.1 | 1838.8 | 1853.0 | 1867.0 | 1854.8 | 1850.7 | 1858.7 | 1858.7 | 1858.7 | 1856.5 | 1856.5 | 1856.5 | 1856.5 |
| gdb 1840 | 1885.2 <sup>a</sup> | 1875.1 | 1863.6 | 1875.1 | 1882.6 | 1876.3 | 1872.8 | 1882.7 | 1882.7 | 1882.7 | 1881.3 | 1881.3 | 1881.3 | 1881.3 |
| gdb 1841 | 1883.1 <sup>a</sup> | 1875.4 | 1864.8 | 1875.3 | 1882.3 | 1875.4 | 1871.0 | 1881.0 | 1881.0 | 1881.0 | 1879.4 | 1879.3 | 1879.3 | 1879.3 |
| gdb 1842 | 1889.0 <sup>a</sup> | 1877.1 | 1864.5 | 1877.7 | 1884.7 | 1879.1 | 1875.9 | 1886.2 | 1886.2 | 1886.2 | 1883.4 | 1883.4 | 1883.3 | 1883.3 |
| gdb 1843 | 1893.8 <sup>a</sup> | 1890.2 | 1878.5 | 1888.8 | 1887.5 | 1883.1 | 1885.4 | 1889.7 | 1889.7 | 1889.7 | 1891.0 | 1891.0 | 1891.0 | 1891.0 |
| gdb 1844 | 1880.4 <sup>a</sup> | 1861.8 | 1832.4 | 1852.0 | 1862.2 | 1849.0 | 1848.4 | 1854.5 | 1854.5 | 1854.5 | 1853.1 | 1853.1 | 1853.1 | 1853.1 |

. . . continued on next page . . .

Table S26: ... continued from previous page. ...

| Molecule | Ref.                | MNDO   | AMI    | PM3    | PM6    | PM7    | OM1    |        | OM2    |        | OM3    |        | D3T    | OM3    | D3     | D3T    |
|----------|---------------------|--------|--------|--------|--------|--------|--------|--------|--------|--------|--------|--------|--------|--------|--------|--------|
|          |                     |        |        |        |        |        | OM1    | OM2    | OM3    | D2     | D3     | D2     |        |        |        |        |
| gdb 1845 | 1859.6 <sup>a</sup> | 1846.4 | 1817.7 | 1838.9 | 1854.3 | 1841.4 | 1837.4 | 1847.3 | 1847.3 | 1847.3 | 1847.0 | 1847.3 | 1847.0 | 1847.0 | 1847.0 | 1847.0 |
| gdb 1846 | 1868.4 <sup>a</sup> | 1862.8 | 1832.2 | 1850.9 | 1855.5 | 1843.7 | 1846.7 | 1850.4 | 1850.3 | 1850.3 | 1854.2 | 1850.3 | 1854.2 | 1854.1 | 1854.1 | 1854.1 |
| gdb 1847 | 1891.4 <sup>a</sup> | 1896.1 | 1885.8 | 1893.9 | 1901.5 | 1895.0 | 1888.1 | 1897.3 | 1897.3 | 1897.3 | 1895.4 | 1897.3 | 1895.4 | 1895.4 | 1895.4 | 1895.4 |
| gdb 1848 | 1893.6 <sup>a</sup> | 1896.2 | 1888.9 | 1895.0 | 1901.7 | 1894.6 | 1886.4 | 1896.3 | 1896.3 | 1896.3 | 1894.2 | 1896.3 | 1894.2 | 1894.2 | 1894.2 | 1894.2 |
| gdb 1849 | 1889.3 <sup>a</sup> | 1895.7 | 1887.2 | 1894.7 | 1900.6 | 1893.5 | 1884.8 | 1894.4 | 1894.4 | 1894.4 | 1892.5 | 1894.4 | 1892.5 | 1892.5 | 1892.5 | 1892.5 |
| gdb 1850 | 1897.6 <sup>a</sup> | 1898.0 | 1884.8 | 1893.9 | 1900.9 | 1895.0 | 1889.4 | 1898.6 | 1898.6 | 1898.6 | 1896.4 | 1898.6 | 1896.4 | 1896.4 | 1896.4 | 1896.4 |
| gdb 1851 | 1903.1 <sup>a</sup> | 1909.9 | 1899.3 | 1905.3 | 1906.6 | 1901.0 | 1900.0 | 1903.9 | 1903.9 | 1903.9 | 1905.5 | 1903.9 | 1905.5 | 1905.5 | 1905.5 | 1905.5 |
| gdb 1852 | 1894.2 <sup>a</sup> | 1887.2 | 1892.1 | 1889.2 | 1903.2 | 1896.9 | 1883.2 | 1898.8 | 1898.8 | 1898.8 | 1888.7 | 1898.8 | 1888.7 | 1888.7 | 1888.7 | 1888.7 |
| gdb 1853 | 1898.0 <sup>a</sup> | 1892.6 | 1894.9 | 1894.0 | 1906.7 | 1900.2 | 1887.4 | 1903.3 | 1903.3 | 1903.3 | 1893.0 | 1903.3 | 1893.0 | 1893.0 | 1893.0 | 1893.0 |
| gdb 1854 | 1891.9 <sup>a</sup> | 1887.1 | 1887.8 | 1887.8 | 1899.1 | 1895.0 | 1882.2 | 1895.8 | 1895.8 | 1895.8 | 1888.5 | 1895.8 | 1888.5 | 1888.5 | 1888.5 | 1888.5 |
| gdb 1855 | 1899.1 <sup>a</sup> | 1893.3 | 1893.4 | 1893.1 | 1906.3 | 1900.8 | 1890.0 | 1905.0 | 1905.0 | 1905.0 | 1895.2 | 1905.0 | 1895.2 | 1895.2 | 1895.2 | 1895.2 |
| gdb 1856 | 1896.7 <sup>a</sup> | 1896.6 | 1900.5 | 1897.5 | 1902.6 | 1898.7 | 1890.7 | 1899.2 | 1899.2 | 1899.2 | 1895.1 | 1899.2 | 1895.1 | 1895.1 | 1895.1 | 1895.1 |
| gdb 1857 | 1898.3 <sup>a</sup> | 1896.3 | 1900.2 | 1897.8 | 1906.2 | 1901.1 | 1891.4 | 1901.3 | 1901.3 | 1901.3 | 1897.3 | 1901.3 | 1897.3 | 1897.3 | 1897.3 | 1897.3 |
| gdb 1858 | 1896.9 <sup>a</sup> | 1897.6 | 1885.3 | 1895.8 | 1902.1 | 1897.5 | 1888.1 | 1898.9 | 1898.9 | 1898.9 | 1898.8 | 1898.9 | 1898.8 | 1898.8 | 1898.8 | 1898.8 |
| gdb 1859 | 1915.5 <sup>a</sup> | 1906.9 | 1897.4 | 1907.5 | 1913.2 | 1905.9 | 1899.8 | 1909.4 | 1909.4 | 1909.4 | 1907.1 | 1909.4 | 1907.1 | 1907.0 | 1907.0 | 1907.0 |
| gdb 1860 | 1906.0 <sup>a</sup> | 1909.0 | 1898.0 | 1906.2 | 1906.7 | 1902.9 | 1899.9 | 1905.0 | 1905.0 | 1905.0 | 1908.6 | 1905.0 | 1908.6 | 1908.6 | 1908.6 | 1908.6 |
| gdb 1861 | 1905.7 <sup>a</sup> | 1908.9 | 1897.7 | 1905.8 | 1910.1 | 1904.2 | 1900.7 | 1906.4 | 1906.4 | 1906.4 | 1909.8 | 1906.4 | 1909.8 | 1909.8 | 1909.8 | 1909.8 |
| gdb 1862 | 1906.1 <sup>a</sup> | 1897.7 | 1884.5 | 1896.9 | 1900.2 | 1903.3 | 1894.0 | 1904.3 | 1904.3 | 1904.3 | 1900.9 | 1904.3 | 1900.9 | 1900.9 | 1900.9 | 1900.9 |
| gdb 1863 | 1877.8 <sup>a</sup> | 1876.2 | 1853.9 | 1871.0 | 1874.8 | 1872.4 | 1865.8 | 1872.9 | 1872.9 | 1872.9 | 1869.7 | 1872.9 | 1869.7 | 1869.7 | 1869.7 | 1869.7 |
| gdb 1864 | 1869.8 <sup>a</sup> | 1873.2 | 1849.6 | 1866.9 | 1872.2 | 1865.9 | 1855.1 | 1860.1 | 1860.1 | 1860.1 | 1861.2 | 1860.1 | 1861.2 | 1861.2 | 1861.2 | 1861.2 |
| gdb 1865 | 1877.0 <sup>a</sup> | 1887.5 | 1866.7 | 1880.0 | 1879.7 | 1873.7 | 1870.6 | 1872.6 | 1872.6 | 1872.6 | 1876.1 | 1872.6 | 1876.1 | 1876.1 | 1876.1 | 1876.1 |
| gdb 1866 | 1876.8 <sup>a</sup> | 1886.3 | 1866.8 | 1880.0 | 1879.0 | 1873.0 | 1869.1 | 1871.8 | 1871.7 | 1871.7 | 1875.3 | 1871.7 | 1875.3 | 1875.2 | 1875.2 | 1875.2 |
| gdb 1867 | 1850.3 <sup>a</sup> | 1859.7 | 1821.6 | 1842.6 | 1854.6 | 1843.3 | 1830.5 | 1834.2 | 1834.2 | 1834.2 | 1836.7 | 1834.2 | 1836.7 | 1836.7 | 1836.7 | 1836.7 |
| gdb 1868 | 1856.9 <sup>a</sup> | 1866.0 | 1832.0 | 1848.8 | 1856.0 | 1847.6 | 1841.1 | 1845.1 | 1845.1 | 1845.1 | 1842.8 | 1845.1 | 1842.8 | 1842.7 | 1842.7 | 1842.7 |
| gdb 1869 | 1856.5 <sup>a</sup> | 1864.7 | 1830.8 | 1848.2 | 1856.1 | 1847.4 | 1839.6 | 1844.3 | 1844.3 | 1844.3 | 1842.0 | 1844.3 | 1842.0 | 1842.0 | 1842.0 | 1842.0 |
| gdb 1870 | 1856.1 <sup>a</sup> | 1852.5 | 1816.2 | 1837.9 | 1849.5 | 1844.6 | 1834.6 | 1843.8 | 1843.8 | 1843.8 | 1835.0 | 1843.8 | 1835.0 | 1835.0 | 1835.0 | 1835.0 |
| gdb 1871 | 1856.4 <sup>a</sup> | 1875.5 | 1841.3 | 1856.5 | 1864.7 | 1852.6 | 1848.4 | 1849.0 | 1849.0 | 1849.0 | 1853.2 | 1849.0 | 1853.2 | 1853.1 | 1853.1 | 1853.1 |
| gdb 1872 | 1866.6 <sup>a</sup> | 1872.8 | 1854.4 | 1865.8 | 1877.8 | 1868.4 | 1858.6 | 1865.7 | 1865.7 | 1865.7 | 1866.2 | 1865.7 | 1866.2 | 1866.2 | 1866.2 | 1866.2 |
| gdb 1873 | 1875.0 <sup>a</sup> | 1874.6 | 1859.2 | 1867.7 | 1875.7 | 1870.3 | 1865.8 | 1871.3 | 1871.2 | 1871.2 | 1868.2 | 1871.2 | 1868.2 | 1868.2 | 1868.2 | 1868.2 |
| gdb 1874 | 1876.2 <sup>a</sup> | 1874.7 | 1859.8 | 1867.9 | 1877.6 | 1871.6 | 1866.5 | 1872.2 | 1872.2 | 1872.2 | 1869.1 | 1872.2 | 1869.1 | 1869.1 | 1869.1 | 1869.1 |
| gdb 1875 | 1880.9 <sup>a</sup> | 1866.0 | 1846.5 | 1860.1 | 1869.7 | 1868.4 | 1859.9 | 1870.1 | 1870.1 | 1870.1 | 1860.5 | 1870.1 | 1860.5 | 1860.5 | 1860.5 | 1860.5 |
| gdb 1876 | 1874.0 <sup>a</sup> | 1887.1 | 1871.4 | 1878.2 | 1885.7 | 1876.9 | 1873.2 | 1874.8 | 1874.8 | 1874.8 | 1878.3 | 1874.8 | 1878.3 | 1878.3 | 1878.3 | 1878.3 |
| gdb 1877 | 1859.8 <sup>a</sup> | 1850.3 | 1828.8 | 1845.4 | 1859.3 | 1847.8 | 1838.9 | 1851.1 | 1851.1 | 1851.1 | 1849.7 | 1851.1 | 1849.7 | 1849.7 | 1849.7 | 1849.7 |
| gdb 1878 | 1858.7 <sup>a</sup> | 1841.4 | 1816.1 | 1835.3 | 1849.6 | 1843.1 | 1830.8 | 1846.9 | 1846.9 | 1846.9 | 1838.8 | 1846.9 | 1838.8 | 1838.8 | 1838.8 | 1838.8 |
| gdb 1879 | 1864.7 <sup>a</sup> | 1862.5 | 1840.7 | 1855.5 | 1860.7 | 1851.1 | 1846.4 | 1852.9 | 1852.9 | 1852.9 | 1856.8 | 1852.9 | 1856.8 | 1856.7 | 1856.7 | 1856.7 |
| gdb 1880 | 1850.0 <sup>a</sup> | 1866.1 | 1835.7 | 1851.4 | 1862.1 | 1848.8 | 1835.5 | 1839.9 | 1839.9 | 1839.9 | 1839.7 | 1839.9 | 1839.7 | 1839.7 | 1839.7 | 1839.7 |
| gdb 1881 | 1859.5 <sup>a</sup> | 1871.9 | 1839.4 | 1855.8 | 1864.2 | 1852.0 | 1839.7 | 1843.1 | 1843.1 | 1843.1 | 1842.9 | 1843.1 | 1842.9 | 1842.9 | 1842.9 | 1842.9 |
| gdb 1882 | 1850.2 <sup>a</sup> | 1856.2 | 1822.0 | 1841.8 | 1853.6 | 1845.0 | 1829.9 | 1838.7 | 1838.7 | 1838.7 | 1831.6 | 1838.7 | 1831.6 | 1831.6 | 1831.6 | 1831.6 |
| gdb 1883 | 1851.3 <sup>a</sup> | 1878.9 | 1848.5 | 1863.5 | 1868.4 | 1856.7 | 1846.6 | 1848.0 | 1848.0 | 1848.0 | 1850.9 | 1848.0 | 1850.9 | 1850.8 | 1850.8 | 1850.8 |
| gdb 1884 | 1878.8 <sup>a</sup> | 1889.3 | 1877.5 | 1881.3 | 1890.4 | 1885.3 | 1872.0 | 1876.9 | 1876.9 | 1876.9 | 1876.2 | 1876.9 | 1876.2 | 1876.2 | 1876.2 | 1876.2 |
| gdb 1885 | 1887.4 <sup>a</sup> | 1901.7 | 1892.5 | 1892.1 | 1898.6 | 1893.4 | 1883.9 | 1884.2 | 1884.2 | 1884.2 | 1887.4 | 1884.2 | 1887.4 | 1887.4 | 1887.4 | 1887.4 |
| gdb 1886 | 1907.6 <sup>a</sup> | 1898.9 | 1888.2 | 1900.7 | 1907.7 | 1906.0 | 1896.3 | 1907.9 | 1907.9 | 1907.9 | 1905.2 | 1907.9 | 1905.2 | 1905.2 | 1905.2 | 1905.2 |
| gdb 1887 | 1914.6 <sup>a</sup> | 1906.6 | 1895.4 | 1908.3 | 1915.7 | 1908.7 | 1899.5 | 1909.6 | 1909.6 | 1909.6 | 1908.5 | 1909.6 | 1908.5 | 1908.5 | 1908.5 | 1908.5 |
| gdb 1888 | 1904.1 <sup>a</sup> | 1908.8 | 1899.8 | 1908.1 | 1913.0 | 1907.4 | 1900.8 | 1908.0 | 1908.0 | 1908.0 | 1911.7 | 1908.0 | 1911.7 | 1911.6 | 1911.6 | 1911.6 |
| gdb 1889 | 1890.6 <sup>a</sup> | 1902.5 | 1895.2 | 1894.4 | 1901.2 | 1895.9 | 1886.7 | 1886.8 | 1886.8 | 1886.8 | 1890.2 | 1886.8 | 1890.2 | 1890.2 | 1890.2 | 1890.2 |

... continued on next page ...

Table S26: . . . continued from previous page . . .

| Molecule | Ref.                | MNDO   | AMI    | PM3    | PM6    | PM7    | OM1    | OM2    |        | OM3    |        | D3T    |
|----------|---------------------|--------|--------|--------|--------|--------|--------|--------|--------|--------|--------|--------|
|          |                     |        |        |        |        |        |        | D2     | D3     | D2     | D3     |        |
| gdb 1890 | 1846.1 <sup>a</sup> | 1848.6 | 1818.9 | 1832.5 | 1847.8 | 1839.0 | 1826.4 | 1829.7 | 1829.6 | 1824.7 | 1824.7 | 1824.7 |
| gdb 1891 | 1844.9 <sup>a</sup> | 1847.8 | 1817.7 | 1831.4 | 1844.9 | 1837.0 | 1825.6 | 1828.7 | 1828.6 | 1823.7 | 1823.7 | 1823.7 |
| gdb 1892 | 1852.3 <sup>a</sup> | 1850.9 | 1820.2 | 1835.3 | 1847.0 | 1843.8 | 1836.2 | 1841.7 | 1841.7 | 1832.4 | 1832.4 | 1832.4 |
| gdb 1893 | 1852.6 <sup>a</sup> | 1863.3 | 1835.6 | 1846.4 | 1856.2 | 1848.6 | 1842.1 | 1842.3 | 1842.3 | 1840.4 | 1840.4 | 1840.4 |
| gdb 1894 | 1847.5 <sup>a</sup> | 1858.7 | 1828.1 | 1840.6 | 1853.5 | 1842.7 | 1833.3 | 1833.7 | 1833.7 | 1834.7 | 1834.6 | 1834.6 |
| gdb 1895 | 1885.7 <sup>a</sup> | 1887.1 | 1867.7 | 1880.7 | 1886.0 | 1878.5 | 1871.1 | 1872.7 | 1872.6 | 1872.1 | 1872.1 | 1872.1 |
| gdb 1896 | 1867.4 <sup>a</sup> | 1873.5 | 1852.3 | 1866.4 | 1872.7 | 1865.7 | 1854.8 | 1857.1 | 1857.1 | 1859.0 | 1859.0 | 1859.0 |
| gdb 1897 | 1866.9 <sup>a</sup> | 1873.8 | 1852.6 | 1866.5 | 1872.7 | 1865.6 | 1855.2 | 1857.4 | 1857.4 | 1859.3 | 1859.3 | 1859.3 |
| gdb 1898 | 1875.2 <sup>a</sup> | 1876.3 | 1854.7 | 1870.2 | 1874.0 | 1871.7 | 1865.6 | 1870.3 | 1870.3 | 1867.9 | 1867.9 | 1867.9 |
| gdb 1899 | 1874.3 <sup>a</sup> | 1888.0 | 1868.4 | 1879.9 | 1880.2 | 1874.1 | 1871.1 | 1870.6 | 1870.2 | 1875.0 | 1875.0 | 1875.0 |
| gdb 1900 | 1892.4 <sup>a</sup> | 1895.4 | 1886.3 | 1892.9 | 1895.8 | 1891.5 | 1887.7 | 1893.7 | 1893.7 | 1893.1 | 1893.1 | 1893.1 |
| gdb 1901 | 1892.7 <sup>a</sup> | 1895.7 | 1889.3 | 1893.6 | 1895.0 | 1890.0 | 1887.9 | 1894.2 | 1894.2 | 1892.7 | 1892.7 | 1892.7 |
| gdb 1902 | 1890.8 <sup>a</sup> | 1894.8 | 1885.8 | 1892.4 | 1894.0 | 1890.3 | 1887.8 | 1894.0 | 1894.0 | 1893.3 | 1893.3 | 1893.3 |
| gdb 1903 | 1899.5 <sup>a</sup> | 1895.9 | 1884.4 | 1893.1 | 1890.8 | 1892.1 | 1892.3 | 1896.8 | 1896.8 | 1893.3 | 1893.3 | 1893.3 |
| gdb 1904 | 1901.3 <sup>a</sup> | 1905.9 | 1899.9 | 1903.5 | 1902.5 | 1900.2 | 1899.5 | 1901.0 | 1901.0 | 1903.2 | 1903.2 | 1903.2 |
| gdb 1905 | 1885.4 <sup>a</sup> | 1881.7 | 1863.0 | 1880.4 | 1884.6 | 1876.7 | 1871.5 | 1881.0 | 1881.0 | 1883.4 | 1883.4 | 1883.4 |
| gdb 1906 | 1888.4 <sup>a</sup> | 1883.8 | 1864.4 | 1880.7 | 1887.7 | 1880.4 | 1875.8 | 1886.0 | 1886.0 | 1887.2 | 1887.2 | 1887.2 |
| gdb 1907 | 1880.2 <sup>a</sup> | 1868.5 | 1847.6 | 1868.2 | 1874.4 | 1870.4 | 1863.5 | 1876.9 | 1876.9 | 1873.0 | 1873.0 | 1873.0 |
| gdb 1908 | 1895.9 <sup>a</sup> | 1898.8 | 1891.9 | 1896.7 | 1907.2 | 1901.9 | 1892.3 | 1899.8 | 1899.8 | 1899.2 | 1899.2 | 1899.2 |
| gdb 1909 | 1896.0 <sup>a</sup> | 1898.3 | 1895.4 | 1897.7 | 1905.0 | 1900.0 | 1891.8 | 1899.8 | 1899.8 | 1898.0 | 1897.9 | 1897.9 |
| gdb 1910 | 1911.1 <sup>a</sup> | 1906.8 | 1903.3 | 1908.3 | 1915.1 | 1906.9 | 1899.9 | 1906.1 | 1906.0 | 1903.5 | 1903.4 | 1903.4 |
| gdb 1911 | 1902.2 <sup>a</sup> | 1898.2 | 1891.6 | 1896.6 | 1901.2 | 1900.7 | 1896.0 | 1903.1 | 1903.1 | 1899.2 | 1899.2 | 1899.2 |
| gdb 1912 | 1903.9 <sup>a</sup> | 1909.6 | 1904.2 | 1906.2 | 1912.2 | 1907.8 | 1903.2 | 1906.1 | 1906.1 | 1909.2 | 1909.2 | 1909.2 |
| gdb 1913 | 1883.8 <sup>a</sup> | 1883.2 | 1861.8 | 1879.8 | 1881.5 | 1874.2 | 1871.6 | 1880.1 | 1880.1 | 1882.7 | 1882.7 | 1882.7 |
| gdb 1914 | 1887.0 <sup>a</sup> | 1885.2 | 1864.3 | 1881.4 | 1886.9 | 1879.6 | 1875.2 | 1884.8 | 1884.8 | 1886.0 | 1886.0 | 1886.0 |
| gdb 1915 | 1880.4 <sup>a</sup> | 1870.8 | 1848.3 | 1868.7 | 1874.3 | 1870.5 | 1864.4 | 1877.2 | 1877.2 | 1873.2 | 1873.2 | 1873.2 |
| gdb 1916 | 1887.8 <sup>a</sup> | 1888.8 | 1878.6 | 1885.4 | 1891.9 | 1886.7 | 1879.3 | 1887.3 | 1887.3 | 1887.6 | 1887.6 | 1887.6 |
| gdb 1917 | 1887.4 <sup>a</sup> | 1877.7 | 1866.4 | 1876.3 | 1884.0 | 1882.4 | 1873.4 | 1885.3 | 1885.3 | 1878.9 | 1878.9 | 1878.9 |
| gdb 1918 | 1876.3 <sup>a</sup> | 1879.8 | 1863.7 | 1878.2 | 1877.2 | 1871.8 | 1869.1 | 1873.3 | 1873.3 | 1876.0 | 1876.0 | 1876.0 |
| gdb 1919 | 1874.9 <sup>a</sup> | 1868.5 | 1851.5 | 1868.2 | 1870.5 | 1868.6 | 1863.5 | 1872.1 | 1872.1 | 1868.0 | 1868.0 | 1868.0 |
| gdb 1920 | 1872.6 <sup>a</sup> | 1866.1 | 1846.2 | 1865.4 | 1871.8 | 1866.3 | 1856.2 | 1864.1 | 1864.1 | 1864.1 | 1864.1 | 1864.1 |
| gdb 1921 | 1879.3 <sup>a</sup> | 1882.6 | 1867.1 | 1879.6 | 1880.5 | 1875.6 | 1872.5 | 1877.6 | 1877.6 | 1878.5 | 1878.5 | 1878.5 |
| gdb 1922 | 1850.1 <sup>a</sup> | 1847.5 | 1822.2 | 1834.8 | 1847.2 | 1842.6 | 1837.0 | 1840.6 | 1840.6 | 1831.7 | 1831.6 | 1831.6 |
| gdb 1923 | 1846.5 <sup>a</sup> | 1844.4 | 1817.4 | 1831.4 | 1847.0 | 1838.8 | 1828.7 | 1831.0 | 1831.0 | 1826.0 | 1826.0 | 1826.0 |
| gdb 1924 | 1851.3 <sup>a</sup> | 1859.3 | 1834.8 | 1844.7 | 1854.1 | 1846.2 | 1843.2 | 1842.2 | 1842.2 | 1840.1 | 1840.1 | 1840.1 |
| gdb 1925 | 1887.8 <sup>a</sup> | 1892.5 | 1885.6 | 1891.3 | 1894.1 | 1890.4 | 1886.9 | 1891.0 | 1891.0 | 1891.0 | 1891.0 | 1891.0 |
| gdb 1926 | 1889.5 <sup>a</sup> | 1893.6 | 1888.7 | 1892.7 | 1895.0 | 1891.2 | 1890.1 | 1895.2 | 1895.2 | 1893.8 | 1893.8 | 1893.8 |
| gdb 1927 | 1896.8 <sup>a</sup> | 1893.4 | 1886.1 | 1892.4 | 1891.7 | 1892.0 | 1892.7 | 1895.8 | 1895.8 | 1892.5 | 1892.5 | 1892.5 |
| gdb 1928 | 1894.5 <sup>a</sup> | 1903.5 | 1897.7 | 1901.0 | 1898.1 | 1895.4 | 1897.7 | 1896.8 | 1896.8 | 1900.5 | 1900.5 | 1900.5 |
| gdb 1929 | 1871.8 <sup>a</sup> | 1872.5 | 1855.2 | 1868.1 | 1871.3 | 1868.8 | 1865.9 | 1868.3 | 1868.3 | 1865.9 | 1865.8 | 1865.8 |
| gdb 1930 | 1887.0 <sup>a</sup> | 1885.0 | 1873.2 | 1881.9 | 1890.4 | 1882.1 | 1876.0 | 1877.1 | 1876.9 | 1875.0 | 1875.0 | 1875.0 |
| gdb 1931 | 1869.0 <sup>a</sup> | 1869.7 | 1851.8 | 1865.3 | 1873.6 | 1866.9 | 1858.4 | 1859.8 | 1859.8 | 1861.6 | 1861.6 | 1861.6 |
| gdb 1932 | 1872.2 <sup>a</sup> | 1884.1 | 1867.6 | 1877.9 | 1878.6 | 1872.7 | 1871.1 | 1869.0 | 1869.0 | 1873.8 | 1873.8 | 1873.8 |
| gdb 1933 | 1866.2 <sup>a</sup> | 1873.2 | 1854.8 | 1866.5 | 1878.1 | 1868.6 | 1858.2 | 1865.4 | 1865.4 | 1866.0 | 1866.0 | 1866.0 |
| gdb 1934 | 1877.2 <sup>a</sup> | 1876.6 | 1859.4 | 1868.9 | 1877.8 | 1872.7 | 1868.0 | 1873.5 | 1873.5 | 1870.5 | 1870.5 | 1870.5 |

. . . continued on next page . . .

Table S26: ... continued from previous page. ...

| Molecule | Ref.                | MNDO   | AMI    | PM3    | PM6    | PM7    | OM1    | OM2    |        | OM3    |        | D3     | D3T    |
|----------|---------------------|--------|--------|--------|--------|--------|--------|--------|--------|--------|--------|--------|--------|
|          |                     |        |        |        |        |        |        | D2     | D3     | D2     | D3     |        |        |
| gdb 1935 | 1881.0 <sup>a</sup> | 1866.9 | 1846.8 | 1860.3 | 1870.2 | 1868.6 | 1860.2 | 1870.2 | 1870.2 | 1860.9 | 1860.8 | 1860.8 | 1860.8 |
| gdb 1936 | 1881.4 <sup>a</sup> | 1878.4 | 1860.0 | 1870.3 | 1879.7 | 1874.3 | 1867.6 | 1873.4 | 1873.4 | 1870.8 | 1870.8 | 1870.8 | 1870.8 |
| gdb 1937 | 1873.9 <sup>a</sup> | 1885.7 | 1870.0 | 1878.0 | 1886.2 | 1876.1 | 1871.9 | 1874.2 | 1874.2 | 1877.8 | 1877.8 | 1877.8 | 1877.8 |
| gdb 1938 | 1843.1 <sup>a</sup> | 1845.6 | 1813.5 | 1832.3 | 1844.6 | 1835.8 | 1825.3 | 1833.6 | 1833.6 | 1831.4 | 1831.4 | 1831.4 | 1831.4 |
| gdb 1939 | 1842.8 <sup>a</sup> | 1857.8 | 1827.4 | 1844.1 | 1851.9 | 1839.4 | 1830.3 | 1834.1 | 1834.1 | 1839.0 | 1838.9 | 1838.9 | 1838.9 |
| gdb 1940 | 1841.9 <sup>a</sup> | 1856.3 | 1827.3 | 1844.5 | 1852.4 | 1839.9 | 1829.1 | 1833.3 | 1833.3 | 1837.8 | 1837.7 | 1837.8 | 1837.8 |
| gdb 1941 | 1842.8 <sup>a</sup> | 1844.6 | 1813.3 | 1832.4 | 1844.5 | 1835.7 | 1824.7 | 1833.3 | 1833.3 | 1831.1 | 1831.1 | 1831.1 | 1831.1 |
| gdb 1942 | 1841.1 <sup>a</sup> | 1856.6 | 1826.4 | 1843.6 | 1851.3 | 1838.3 | 1829.4 | 1833.8 | 1833.8 | 1838.4 | 1838.4 | 1838.4 | 1838.4 |
| gdb 1943 | 1846.0 <sup>a</sup> | 1846.2 | 1813.1 | 1832.8 | 1846.5 | 1837.8 | 1827.1 | 1835.8 | 1835.8 | 1833.8 | 1833.7 | 1833.7 | 1833.7 |
| gdb 1944 | 1840.2 <sup>a</sup> | 1833.4 | 1798.5 | 1822.0 | 1834.4 | 1830.6 | 1816.0 | 1828.6 | 1828.6 | 1820.0 | 1820.0 | 1820.0 | 1820.0 |
| gdb 1945 | 1863.0 <sup>a</sup> | 1850.2 | 1828.2 | 1846.1 | 1862.2 | 1850.3 | 1841.6 | 1855.2 | 1855.2 | 1853.7 | 1853.6 | 1853.6 | 1853.6 |
| gdb 1946 | 1859.8 <sup>a</sup> | 1840.7 | 1815.8 | 1835.3 | 1850.7 | 1843.5 | 1832.2 | 1849.3 | 1849.2 | 1840.9 | 1840.9 | 1840.9 | 1840.9 |
| gdb 1947 | 1868.4 <sup>a</sup> | 1853.0 | 1830.9 | 1847.2 | 1857.4 | 1850.9 | 1845.4 | 1856.9 | 1856.9 | 1852.7 | 1852.7 | 1852.7 | 1852.7 |
| gdb 1948 | 1868.3 <sup>a</sup> | 1863.2 | 1841.6 | 1857.3 | 1864.4 | 1853.2 | 1849.9 | 1857.5 | 1857.5 | 1860.0 | 1860.0 | 1860.0 | 1860.0 |
| gdb 1949 | 1851.9 <sup>a</sup> | 1865.8 | 1837.4 | 1853.0 | 1863.6 | 1850.7 | 1837.8 | 1845.4 | 1845.4 | 1842.9 | 1842.9 | 1842.9 | 1842.9 |
| gdb 1950 | 1850.8 <sup>a</sup> | 1864.7 | 1835.4 | 1851.6 | 1862.1 | 1849.1 | 1836.9 | 1843.0 | 1843.0 | 1841.9 | 1841.9 | 1841.9 | 1841.9 |
| gdb 1951 | 1848.0 <sup>a</sup> | 1853.9 | 1822.1 | 1841.3 | 1852.5 | 1844.3 | 1829.5 | 1839.4 | 1839.4 | 1831.7 | 1831.6 | 1831.6 | 1831.6 |
| gdb 1952 | 1850.8 <sup>a</sup> | 1853.4 | 1821.0 | 1841.2 | 1854.3 | 1846.0 | 1830.4 | 1840.8 | 1840.8 | 1833.2 | 1833.2 | 1833.2 | 1833.2 |
| gdb 1953 | 1855.3 <sup>a</sup> | 1867.7 | 1837.1 | 1855.1 | 1864.3 | 1856.6 | 1846.0 | 1853.0 | 1853.0 | 1847.6 | 1847.6 | 1847.6 | 1847.6 |
| gdb 1954 | 1853.1 <sup>a</sup> | 1864.0 | 1834.1 | 1851.3 | 1864.5 | 1851.4 | 1837.8 | 1844.1 | 1844.1 | 1843.6 | 1843.6 | 1843.6 | 1843.6 |
| gdb 1955 | 1855.6 <sup>a</sup> | 1878.6 | 1850.6 | 1865.5 | 1873.4 | 1861.0 | 1852.5 | 1855.4 | 1855.4 | 1857.0 | 1857.0 | 1857.0 | 1857.0 |
| gdb 1956 | 1867.0 <sup>a</sup> | 1870.1 | 1851.0 | 1860.1 | 1871.7 | 1865.9 | 1857.5 | 1864.2 | 1864.2 | 1858.0 | 1858.0 | 1858.0 | 1858.0 |
| gdb 1957 | 1876.6 <sup>a</sup> | 1870.7 | 1851.8 | 1861.7 | 1869.5 | 1867.8 | 1863.3 | 1868.6 | 1868.6 | 1859.5 | 1859.5 | 1859.5 | 1859.5 |
| gdb 1958 | 1869.6 <sup>a</sup> | 1869.0 | 1848.6 | 1859.4 | 1869.9 | 1865.8 | 1857.7 | 1863.9 | 1863.9 | 1858.2 | 1858.2 | 1858.2 | 1858.2 |
| gdb 1959 | 1870.1 <sup>a</sup> | 1880.0 | 1861.0 | 1868.6 | 1880.2 | 1871.7 | 1865.3 | 1867.6 | 1867.6 | 1868.4 | 1868.4 | 1868.4 | 1868.4 |
| gdb 1960 | 1875.6 <sup>a</sup> | 1881.3 | 1863.6 | 1870.4 | 1878.6 | 1872.2 | 1870.0 | 1871.4 | 1871.4 | 1869.1 | 1869.1 | 1869.1 | 1869.1 |
| gdb 1961 | 1848.7 <sup>a</sup> | 1861.6 | 1825.1 | 1845.0 | 1859.7 | 1846.2 | 1827.7 | 1833.0 | 1833.0 | 1830.1 | 1830.1 | 1830.1 | 1830.1 |
| gdb 1962 | 1853.3 <sup>a</sup> | 1863.2 | 1827.0 | 1847.9 | 1858.7 | 1849.7 | 1836.2 | 1842.6 | 1842.6 | 1835.6 | 1835.6 | 1835.6 | 1835.6 |
| gdb 1963 | 1849.7 <sup>a</sup> | 1863.6 | 1829.5 | 1847.9 | 1859.1 | 1848.6 | 1835.1 | 1840.5 | 1840.5 | 1833.7 | 1833.7 | 1833.7 | 1833.7 |
| gdb 1964 | 1855.8 <sup>a</sup> | 1875.2 | 1840.4 | 1858.3 | 1869.2 | 1855.1 | 1844.5 | 1846.6 | 1846.6 | 1846.4 | 1846.3 | 1846.3 | 1846.3 |
| gdb 1965 | 1851.1 <sup>a</sup> | 1875.6 | 1842.7 | 1857.8 | 1867.0 | 1853.0 | 1841.9 | 1843.1 | 1843.1 | 1843.0 | 1843.0 | 1843.0 | 1843.0 |
| gdb 1966 | 1873.6 <sup>a</sup> | 1868.2 | 1852.2 | 1861.8 | 1874.2 | 1868.8 | 1856.8 | 1865.4 | 1865.4 | 1857.3 | 1857.3 | 1857.3 | 1857.3 |
| gdb 1967 | 1876.6 <sup>a</sup> | 1879.2 | 1865.6 | 1871.7 | 1888.1 | 1877.5 | 1867.6 | 1872.3 | 1872.3 | 1870.7 | 1870.7 | 1870.7 | 1870.7 |
| gdb 1968 | 1880.7 <sup>a</sup> | 1866.1 | 1846.8 | 1860.4 | 1870.5 | 1868.7 | 1859.9 | 1870.1 | 1870.1 | 1860.8 | 1860.8 | 1860.8 | 1860.8 |
| gdb 1969 | 1878.2 <sup>a</sup> | 1876.3 | 1859.9 | 1869.2 | 1880.2 | 1874.5 | 1868.3 | 1874.1 | 1874.1 | 1871.4 | 1871.4 | 1871.4 | 1871.4 |
| gdb 1970 | 1874.4 <sup>a</sup> | 1885.8 | 1870.2 | 1877.8 | 1885.5 | 1876.3 | 1871.4 | 1874.1 | 1874.1 | 1877.7 | 1877.7 | 1877.7 | 1877.7 |
| gdb 1971 | 1868.4 <sup>a</sup> | 1870.5 | 1855.5 | 1860.6 | 1872.7 | 1868.1 | 1859.4 | 1863.0 | 1863.0 | 1857.1 | 1857.1 | 1857.1 | 1857.1 |
| gdb 1972 | 1879.6 <sup>a</sup> | 1872.6 | 1856.7 | 1862.6 | 1872.1 | 1870.7 | 1866.6 | 1870.0 | 1870.0 | 1861.0 | 1861.0 | 1861.0 | 1861.0 |
| gdb 1973 | 1869.0 <sup>a</sup> | 1871.0 | 1856.8 | 1863.0 | 1874.5 | 1869.4 | 1857.0 | 1861.4 | 1861.4 | 1854.9 | 1854.9 | 1854.9 | 1854.9 |
| gdb 1974 | 1869.7 <sup>a</sup> | 1881.3 | 1869.2 | 1871.8 | 1885.5 | 1875.7 | 1864.7 | 1865.5 | 1865.5 | 1865.4 | 1865.4 | 1865.4 | 1865.4 |
| gdb 1975 | 1880.5 <sup>a</sup> | 1883.0 | 1869.2 | 1871.7 | 1882.0 | 1876.8 | 1873.0 | 1872.3 | 1872.3 | 1870.0 | 1870.0 | 1870.0 | 1870.0 |
| gdb 1976 | 1863.1 <sup>a</sup> | 1849.4 | 1827.8 | 1845.6 | 1861.7 | 1850.1 | 1841.9 | 1855.2 | 1855.2 | 1853.6 | 1853.6 | 1853.6 | 1853.6 |
| gdb 1977 | 1859.9 <sup>a</sup> | 1839.6 | 1815.4 | 1835.0 | 1850.3 | 1843.4 | 1832.1 | 1849.3 | 1849.3 | 1840.9 | 1840.9 | 1840.9 | 1840.9 |
| gdb 1978 | 1868.9 <sup>a</sup> | 1851.6 | 1829.7 | 1846.1 | 1856.3 | 1850.1 | 1844.5 | 1855.8 | 1855.8 | 1851.5 | 1851.5 | 1851.5 | 1851.5 |
| gdb 1979 | 1869.1 <sup>a</sup> | 1863.7 | 1841.9 | 1857.2 | 1862.8 | 1853.1 | 1850.1 | 1856.9 | 1856.9 | 1859.5 | 1859.5 | 1859.5 | 1859.5 |

... continued on next page ...





Table S26: ... continued from previous page. ...

| Molecule | Ref.                | MNDO   | AMI    | PM3    | PM6    | PM7    | OM1    | OM2    |        | OM3    |        | D3T    |
|----------|---------------------|--------|--------|--------|--------|--------|--------|--------|--------|--------|--------|--------|
|          |                     |        |        |        |        |        |        | D2     | D3     | D2     | D3     |        |
| gdb 2025 | 1877.3 <sup>a</sup> | 1884.0 | 1869.8 | 1872.1 | 1883.0 | 1877.0 | 1873.3 | 1871.6 | 1871.5 | 1870.1 | 1870.1 | 1870.1 |
| gdb 2026 | 1862.4 <sup>a</sup> | 1881.2 | 1866.1 | 1872.1 | 1883.3 | 1873.9 | 1867.4 | 1865.6 | 1865.6 | 1867.3 | 1867.3 | 1867.3 |
| gdb 2027 | 1863.8 <sup>a</sup> | 1871.1 | 1855.5 | 1866.1 | 1876.2 | 1866.8 | 1856.6 | 1863.9 | 1863.9 | 1864.0 | 1864.0 | 1864.0 |
| gdb 2028 | 1882.1 <sup>a</sup> | 1879.2 | 1859.4 | 1869.7 | 1877.3 | 1872.8 | 1868.1 | 1872.9 | 1872.9 | 1870.4 | 1870.4 | 1870.4 |
| gdb 2029 | 1881.7 <sup>a</sup> | 1866.6 | 1846.3 | 1860.0 | 1869.5 | 1868.4 | 1860.4 | 1870.2 | 1870.2 | 1860.8 | 1860.8 | 1860.8 |
| gdb 2030 | 1874.4 <sup>a</sup> | 1887.2 | 1871.8 | 1878.5 | 1884.2 | 1876.2 | 1873.9 | 1874.4 | 1874.4 | 1878.3 | 1878.3 | 1878.3 |
| gdb 2031 | 1874.3 <sup>a</sup> | 1868.9 | 1852.3 | 1861.8 | 1873.9 | 1868.9 | 1857.5 | 1865.7 | 1865.7 | 1857.6 | 1857.6 | 1857.6 |
| gdb 2032 | 1876.7 <sup>a</sup> | 1879.8 | 1864.6 | 1870.9 | 1884.8 | 1875.4 | 1867.0 | 1870.9 | 1870.9 | 1869.2 | 1869.2 | 1869.2 |
| gdb 2033 | 1866.1 <sup>a</sup> | 1873.9 | 1861.8 | 1870.5 | 1881.9 | 1871.8 | 1859.9 | 1866.1 | 1866.1 | 1865.2 | 1865.2 | 1865.2 |
| gdb 2034 | 1868.0 <sup>a</sup> | 1881.7 | 1861.5 | 1870.9 | 1882.2 | 1872.1 | 1858.7 | 1864.8 | 1864.8 | 1860.3 | 1860.3 | 1860.3 |
| gdb 2035 | 1876.9 <sup>a</sup> | 1882.8 | 1861.5 | 1871.7 | 1880.5 | 1874.2 | 1865.1 | 1869.3 | 1869.3 | 1862.0 | 1862.0 | 1862.0 |
| gdb 2036 | 1877.4 <sup>a</sup> | 1882.5 | 1862.3 | 1872.5 | 1882.5 | 1875.9 | 1865.4 | 1869.9 | 1869.9 | 1862.9 | 1862.9 | 1862.9 |
| gdb 2037 | 1876.4 <sup>a</sup> | 1894.8 | 1874.8 | 1881.4 | 1888.3 | 1878.9 | 1872.3 | 1871.3 | 1871.3 | 1871.0 | 1871.0 | 1871.0 |
| gdb 2038 | 1875.3 <sup>a</sup> | 1893.6 | 1873.5 | 1880.5 | 1889.0 | 1879.1 | 1871.4 | 1871.3 | 1871.3 | 1871.0 | 1871.0 | 1871.0 |
| gdb 2039 | 1871.2 <sup>a</sup> | 1894.3 | 1873.8 | 1882.0 | 1889.7 | 1880.8 | 1872.1 | 1874.1 | 1874.1 | 1873.4 | 1873.4 | 1873.4 |
| gdb 2040 | 1876.8 <sup>a</sup> | 1880.5 | 1863.1 | 1877.4 | 1876.5 | 1871.8 | 1870.7 | 1874.3 | 1874.2 | 1876.9 | 1876.9 | 1876.9 |
| gdb 2041 | 1881.5 <sup>a</sup> | 1881.9 | 1867.1 | 1879.3 | 1879.9 | 1875.9 | 1874.0 | 1878.8 | 1878.8 | 1879.5 | 1879.5 | 1879.5 |
| gdb 2042 | 1869.5 <sup>a</sup> | 1865.6 | 1846.8 | 1864.6 | 1870.2 | 1864.7 | 1855.2 | 1862.5 | 1862.5 | 1862.1 | 1862.1 | 1862.1 |
| gdb 2043 | 1875.4 <sup>a</sup> | 1867.5 | 1851.1 | 1867.6 | 1870.6 | 1868.9 | 1863.6 | 1872.3 | 1872.3 | 1867.8 | 1867.8 | 1867.8 |
| gdb 2044 | 1846.1 <sup>a</sup> | 1860.9 | 1825.9 | 1844.9 | 1858.0 | 1844.6 | 1826.5 | 1831.6 | 1831.6 | 1828.3 | 1828.3 | 1828.3 |
| gdb 2045 | 1854.9 <sup>a</sup> | 1863.2 | 1827.4 | 1848.1 | 1860.8 | 1851.5 | 1838.8 | 1845.1 | 1845.1 | 1837.9 | 1837.9 | 1837.9 |
| gdb 2046 | 1850.1 <sup>a</sup> | 1862.1 | 1828.9 | 1847.5 | 1858.7 | 1848.7 | 1835.0 | 1840.7 | 1840.7 | 1833.7 | 1833.7 | 1833.7 |
| gdb 2047 | 1858.4 <sup>a</sup> | 1877.0 | 1842.5 | 1859.3 | 1868.7 | 1856.6 | 1847.2 | 1848.3 | 1848.3 | 1847.8 | 1847.8 | 1847.8 |
| gdb 2048 | 1851.6 <sup>a</sup> | 1875.0 | 1842.1 | 1857.3 | 1865.7 | 1852.4 | 1842.5 | 1843.4 | 1843.4 | 1843.2 | 1843.2 | 1843.2 |
| gdb 2049 | 1852.9 <sup>a</sup> | 1872.4 | 1837.5 | 1856.3 | 1864.9 | 1853.0 | 1841.0 | 1843.0 | 1843.0 | 1842.9 | 1842.9 | 1842.9 |
| gdb 2050 | 1843.2 <sup>a</sup> | 1844.4 | 1817.8 | 1830.0 | 1844.6 | 1836.3 | 1827.0 | 1829.1 | 1829.1 | 1823.8 | 1823.8 | 1823.8 |
| gdb 2051 | 1850.1 <sup>a</sup> | 1847.2 | 1821.9 | 1834.8 | 1846.8 | 1842.8 | 1837.2 | 1840.6 | 1840.6 | 1831.6 | 1831.6 | 1831.6 |
| gdb 2052 | 1850.9 <sup>a</sup> | 1859.0 | 1834.0 | 1843.9 | 1853.2 | 1845.5 | 1843.5 | 1842.2 | 1842.2 | 1839.9 | 1839.9 | 1839.9 |
| gdb 2053 | 1847.0 <sup>a</sup> | 1855.0 | 1828.5 | 1840.6 | 1854.0 | 1842.9 | 1836.0 | 1835.4 | 1835.4 | 1835.8 | 1835.8 | 1835.8 |
| gdb 2054 | 1888.9 <sup>a</sup> | 1885.5 | 1873.5 | 1881.7 | 1890.5 | 1883.0 | 1877.9 | 1878.5 | 1878.5 | 1876.4 | 1876.4 | 1876.4 |
| gdb 2055 | 1865.7 <sup>a</sup> | 1869.6 | 1852.5 | 1865.4 | 1871.8 | 1864.8 | 1857.0 | 1858.1 | 1858.1 | 1859.5 | 1859.5 | 1859.5 |
| gdb 2056 | 1871.8 <sup>a</sup> | 1871.7 | 1855.1 | 1868.2 | 1871.0 | 1868.9 | 1866.1 | 1868.6 | 1868.6 | 1865.8 | 1865.8 | 1865.8 |
| gdb 2057 | 1873.3 <sup>a</sup> | 1883.3 | 1867.3 | 1877.1 | 1877.7 | 1872.4 | 1872.1 | 1869.9 | 1869.9 | 1874.5 | 1874.5 | 1874.5 |
| gdb 2058 | 1904.3 <sup>a</sup> | 1899.0 | 1893.6 | 1898.3 | 1905.8 | 1904.5 | 1897.7 | 1904.0 | 1904.0 | 1901.2 | 1901.2 | 1901.2 |
| gdb 2059 | 1908.9 <sup>a</sup> | 1907.4 | 1899.9 | 1907.7 | 1914.8 | 1908.0 | 1900.1 | 1904.7 | 1904.7 | 1903.3 | 1903.3 | 1903.3 |
| gdb 2060 | 1909.9 <sup>a</sup> | 1907.2 | 1903.9 | 1909.0 | 1916.1 | 1908.0 | 1900.3 | 1906.1 | 1906.1 | 1903.7 | 1903.7 | 1903.7 |
| gdb 2061 | 1890.1 <sup>a</sup> | 1895.7 | 1892.4 | 1896.9 | 1904.1 | 1899.1 | 1885.5 | 1893.1 | 1893.1 | 1892.6 | 1892.6 | 1892.6 |
| gdb 2062 | 1901.5 <sup>a</sup> | 1908.5 | 1903.9 | 1905.9 | 1913.4 | 1908.4 | 1902.3 | 1905.1 | 1905.1 | 1908.6 | 1908.6 | 1908.6 |
| gdb 2063 | 1866.8 <sup>a</sup> | 1869.6 | 1856.6 | 1860.8 | 1871.0 | 1866.4 | 1858.3 | 1861.7 | 1861.7 | 1855.4 | 1855.4 | 1855.4 |
| gdb 2064 | 1879.7 <sup>a</sup> | 1873.8 | 1856.8 | 1862.7 | 1871.8 | 1870.6 | 1866.8 | 1870.1 | 1870.1 | 1861.0 | 1861.0 | 1861.0 |
| gdb 2065 | 1869.2 <sup>a</sup> | 1871.8 | 1856.7 | 1863.0 | 1874.8 | 1869.3 | 1856.6 | 1861.3 | 1861.3 | 1855.1 | 1855.1 | 1855.1 |
| gdb 2066 | 1880.0 <sup>a</sup> | 1884.6 | 1868.8 | 1871.6 | 1880.1 | 1875.4 | 1872.8 | 1871.8 | 1871.8 | 1869.5 | 1869.5 | 1869.5 |
| gdb 2067 | 1870.2 <sup>a</sup> | 1882.7 | 1868.4 | 1871.2 | 1884.2 | 1875.3 | 1867.9 | 1867.8 | 1867.8 | 1868.2 | 1868.2 | 1868.2 |
| gdb 2068 | 1868.4 <sup>a</sup> | 1880.4 | 1867.7 | 1870.4 | 1882.8 | 1874.3 | 1867.4 | 1867.7 | 1867.7 | 1867.7 | 1867.7 | 1867.7 |
| gdb 2069 | 1864.9 <sup>a</sup> | 1868.7 | 1851.7 | 1860.0 | 1870.0 | 1864.2 | 1855.5 | 1862.4 | 1862.4 | 1855.7 | 1855.7 | 1855.7 |

... continued on next page ...

Table S26: ... continued from previous page. ...

| Molecule | Ref.                | MNDO   | AMI    | PM3    | PM6    | PM7    | OM1    | OM2    |        | OM3    |        | D3T    |
|----------|---------------------|--------|--------|--------|--------|--------|--------|--------|--------|--------|--------|--------|
|          |                     |        |        |        |        |        |        | D2     | D3     | D2     | D3     |        |
| gdb 2070 | 1877.0 <sup>a</sup> | 1869.5 | 1850.9 | 1860.6 | 1868.6 | 1867.4 | 1863.3 | 1868.7 | 1868.6 | 1868.7 | 1859.4 | 1859.4 |
| gdb 2071 | 1869.7 <sup>a</sup> | 1867.1 | 1847.7 | 1858.7 | 1869.3 | 1865.6 | 1857.2 | 1864.0 | 1864.0 | 1864.0 | 1858.2 | 1858.2 |
| gdb 2072 | 1875.9 <sup>a</sup> | 1881.4 | 1863.0 | 1869.8 | 1875.8 | 1871.2 | 1870.1 | 1871.0 | 1870.9 | 1871.0 | 1868.5 | 1868.5 |
| gdb 2073 | 1870.5 <sup>a</sup> | 1879.8 | 1861.2 | 1868.6 | 1879.2 | 1871.4 | 1866.2 | 1868.2 | 1868.2 | 1868.2 | 1869.0 | 1869.0 |
| gdb 2074 | 1866.1 <sup>a</sup> | 1879.7 | 1862.9 | 1869.4 | 1879.5 | 1870.6 | 1864.2 | 1867.1 | 1867.1 | 1867.1 | 1867.0 | 1867.0 |
| gdb 2075 | 1888.8 <sup>a</sup> | 1891.7 | 1887.3 | 1891.0 | 1894.5 | 1890.5 | 1889.3 | 1894.9 | 1894.9 | 1894.9 | 1893.1 | 1893.1 |
| gdb 2076 | 1885.2 <sup>a</sup> | 1890.2 | 1886.3 | 1890.9 | 1893.1 | 1888.6 | 1884.3 | 1889.2 | 1889.2 | 1889.2 | 1888.5 | 1888.5 |
| gdb 2077 | 1897.1 <sup>a</sup> | 1892.8 | 1885.8 | 1892.1 | 1891.7 | 1892.2 | 1892.7 | 1895.9 | 1895.9 | 1895.9 | 1892.6 | 1892.6 |
| gdb 2078 | 1894.8 <sup>a</sup> | 1903.3 | 1896.7 | 1900.0 | 1898.2 | 1895.8 | 1898.8 | 1897.1 | 1897.1 | 1897.1 | 1900.2 | 1900.2 |
| gdb 2079 | 1875.8 <sup>a</sup> | 1888.6 | 1881.2 | 1878.9 | 1887.9 | 1882.6 | 1874.1 | 1871.8 | 1871.8 | 1871.8 | 1872.7 | 1872.7 |
| gdb 2080 | 1910.6 <sup>a</sup> | 1907.2 | 1902.5 | 1907.3 | 1913.0 | 1906.1 | 1900.4 | 1906.1 | 1906.1 | 1906.1 | 1903.0 | 1903.0 |
| gdb 2081 | 1895.8 <sup>a</sup> | 1898.7 | 1894.5 | 1896.7 | 1903.3 | 1899.1 | 1891.6 | 1899.2 | 1899.2 | 1899.2 | 1897.3 | 1897.3 |
| gdb 2082 | 1892.6 <sup>a</sup> | 1898.0 | 1893.1 | 1897.2 | 1905.3 | 1900.2 | 1888.0 | 1895.1 | 1895.1 | 1895.1 | 1894.2 | 1894.2 |
| gdb 2083 | 1902.9 <sup>a</sup> | 1899.1 | 1890.7 | 1895.8 | 1899.4 | 1899.9 | 1896.4 | 1902.8 | 1902.8 | 1902.8 | 1898.7 | 1898.7 |
| gdb 2084 | 1904.4 <sup>a</sup> | 1910.6 | 1903.9 | 1905.5 | 1908.5 | 1905.7 | 1903.7 | 1905.0 | 1905.0 | 1905.0 | 1908.2 | 1908.2 |
| gdb 2085 | 1873.4 <sup>a</sup> | 1878.5 | 1870.9 | 1870.4 | 1880.0 | 1876.5 | 1865.1 | 1868.8 | 1868.8 | 1868.8 | 1861.9 | 1861.9 |
| gdb 2086 | 1874.0 <sup>a</sup> | 1889.3 | 1881.0 | 1877.7 | 1888.1 | 1881.1 | 1870.1 | 1871.3 | 1871.3 | 1871.3 | 1870.2 | 1870.2 |
| gdb 2087 | 1874.9 <sup>a</sup> | 1888.4 | 1879.2 | 1877.1 | 1886.4 | 1881.4 | 1872.2 | 1870.8 | 1870.8 | 1870.8 | 1870.9 | 1870.9 |
| gdb 2088 | 1869.0 <sup>a</sup> | 1867.4 | 1835.6 | 1856.4 | 1866.0 | 1853.4 | 1845.0 | 1858.3 | 1858.3 | 1858.3 | 1855.0 | 1855.0 |
| gdb 2089 | 1871.4 <sup>a</sup> | 1865.4 | 1833.9 | 1855.1 | 1869.7 | 1856.6 | 1847.8 | 1862.6 | 1862.6 | 1862.6 | 1859.6 | 1859.6 |
| gdb 2090 | 1870.0 <sup>a</sup> | 1867.5 | 1836.0 | 1856.8 | 1867.6 | 1855.1 | 1846.3 | 1859.4 | 1859.4 | 1859.4 | 1856.4 | 1856.4 |
| gdb 2091 | 1869.8 <sup>a</sup> | 1857.5 | 1823.0 | 1846.6 | 1865.8 | 1853.3 | 1839.6 | 1858.5 | 1858.5 | 1858.5 | 1852.3 | 1852.3 |
| gdb 2092 | 1876.5 <sup>a</sup> | 1878.0 | 1848.4 | 1867.6 | 1871.3 | 1859.6 | 1856.2 | 1864.9 | 1864.9 | 1864.9 | 1865.1 | 1865.1 |
| gdb 2093 | 1853.6 <sup>a</sup> | 1855.5 | 1801.0 | 1828.8 | 1839.2 | 1819.2 | 1819.4 | 1826.0 | 1826.0 | 1826.0 | 1828.9 | 1828.9 |
| gdb 2094 | 1845.0 <sup>a</sup> | 1844.9 | 1789.5 | 1819.3 | 1835.8 | 1816.1 | 1810.5 | 1820.6 | 1820.6 | 1820.6 | 1820.3 | 1820.3 |
| gdb 2095 | 1850.4 <sup>a</sup> | 1854.8 | 1801.5 | 1829.8 | 1839.3 | 1819.4 | 1818.1 | 1824.3 | 1824.3 | 1824.3 | 1827.3 | 1827.3 |
| gdb 2096 | 1847.5 <sup>a</sup> | 1844.9 | 1788.8 | 1819.6 | 1836.8 | 1817.7 | 1811.9 | 1822.4 | 1822.4 | 1822.4 | 1822.3 | 1822.3 |
| gdb 2097 | 1836.5 <sup>a</sup> | 1833.3 | 1775.3 | 1807.5 | 1831.4 | 1812.3 | 1800.5 | 1817.6 | 1817.5 | 1817.5 | 1813.0 | 1813.0 |
| gdb 2098 | 1871.0 <sup>a</sup> | 1865.7 | 1828.3 | 1847.7 | 1859.7 | 1843.3 | 1840.5 | 1850.2 | 1850.2 | 1850.2 | 1849.4 | 1849.4 |
| gdb 2099 | 1860.3 <sup>a</sup> | 1852.1 | 1813.5 | 1835.6 | 1855.9 | 1839.6 | 1829.6 | 1844.9 | 1844.9 | 1844.9 | 1840.6 | 1840.6 |
| gdb 2100 | 1876.9 <sup>a</sup> | 1875.4 | 1836.2 | 1855.2 | 1860.0 | 1844.6 | 1849.7 | 1854.1 | 1854.1 | 1854.1 | 1856.5 | 1856.5 |
| gdb 2101 | 1859.0 <sup>a</sup> | 1871.1 | 1830.9 | 1853.8 | 1858.2 | 1843.9 | 1836.8 | 1841.0 | 1841.0 | 1841.0 | 1845.3 | 1845.3 |
| gdb 2102 | 1862.5 <sup>a</sup> | 1872.0 | 1832.3 | 1855.3 | 1861.3 | 1846.4 | 1839.4 | 1846.0 | 1846.0 | 1846.0 | 1848.6 | 1848.6 |
| gdb 2103 | 1855.5 <sup>a</sup> | 1857.4 | 1813.8 | 1841.2 | 1854.6 | 1840.1 | 1826.1 | 1835.9 | 1835.9 | 1835.9 | 1837.3 | 1837.3 |
| gdb 2104 | 1862.2 <sup>a</sup> | 1874.2 | 1832.7 | 1855.5 | 1860.3 | 1846.6 | 1840.8 | 1846.1 | 1846.1 | 1846.1 | 1849.3 | 1849.3 |
| gdb 2105 | 1853.0 <sup>a</sup> | 1859.3 | 1815.2 | 1841.6 | 1853.6 | 1839.1 | 1825.5 | 1834.7 | 1834.7 | 1834.7 | 1835.8 | 1835.8 |
| gdb 2106 | 1851.3 <sup>a</sup> | 1858.9 | 1815.4 | 1841.2 | 1852.1 | 1837.3 | 1825.0 | 1835.5 | 1835.5 | 1835.5 | 1835.5 | 1835.5 |
| gdb 2107 | 1858.9 <sup>a</sup> | 1873.0 | 1832.7 | 1855.4 | 1859.5 | 1844.2 | 1840.1 | 1844.2 | 1844.2 | 1844.2 | 1847.2 | 1847.2 |
| gdb 2108 | 1856.6 <sup>a</sup> | 1871.7 | 1830.0 | 1853.0 | 1856.5 | 1842.2 | 1836.5 | 1841.8 | 1841.8 | 1841.8 | 1846.1 | 1846.1 |
| gdb 2109 | 1854.3 <sup>a</sup> | 1859.1 | 1814.9 | 1841.4 | 1853.4 | 1839.0 | 1827.3 | 1838.2 | 1838.2 | 1838.2 | 1838.8 | 1838.8 |
| gdb 2110 | 1892.7 <sup>a</sup> | 1880.4 | 1865.6 | 1878.4 | 1891.9 | 1881.9 | 1866.9 | 1884.9 | 1884.9 | 1884.9 | 1878.5 | 1878.5 |
| gdb 2111 | 1893.7 <sup>a</sup> | 1885.5 | 1870.3 | 1882.5 | 1890.6 | 1882.4 | 1872.8 | 1884.2 | 1884.2 | 1884.2 | 1883.7 | 1883.7 |
| gdb 2112 | 1895.4 <sup>a</sup> | 1880.3 | 1864.2 | 1877.8 | 1882.4 | 1868.7 | 1868.7 | 1886.6 | 1886.6 | 1886.6 | 1880.5 | 1880.5 |
| gdb 2113 | 1898.4 <sup>a</sup> | 1898.1 | 1885.2 | 1894.3 | 1895.0 | 1887.9 | 1884.6 | 1891.4 | 1891.4 | 1891.4 | 1890.0 | 1890.0 |
| gdb 2114 | 1876.0 <sup>a</sup> | 1880.5 | 1858.4 | 1871.3 | 1881.7 | 1870.3 | 1862.8 | 1871.9 | 1871.9 | 1871.9 | 1871.2 | 1871.2 |

... continued on next page ...



Table S26: ... continued from previous page. ...

| Molecule | Ref.                | MNDO   | AMI    | PM3    | PM6    | PM7    | OM1    |        | OM2    |        | OM3    |        | D3T    |
|----------|---------------------|--------|--------|--------|--------|--------|--------|--------|--------|--------|--------|--------|--------|
|          |                     |        |        |        |        |        | D2     | D3     | D2     | D3     | D2     | D3     |        |
| gdb 2160 | 1868.5 <sup>a</sup> | 1862.3 | 1825.6 | 1845.0 | 1858.0 | 1842.6 | 1839.2 | 1850.0 | 1850.0 | 1848.6 | 1848.6 | 1848.6 | 1848.6 |
| gdb 2161 | 1869.8 <sup>a</sup> | 1861.6 | 1825.8 | 1845.3 | 1856.9 | 1841.1 | 1839.6 | 1849.5 | 1849.5 | 1848.2 | 1848.2 | 1848.2 | 1848.2 |
| gdb 2162 | 1857.8 <sup>a</sup> | 1849.5 | 1813.3 | 1834.3 | 1853.4 | 1837.4 | 1828.0 | 1843.3 | 1843.3 | 1838.5 | 1838.5 | 1838.5 | 1838.5 |
| gdb 2163 | 1867.5 <sup>a</sup> | 1861.6 | 1826.0 | 1845.7 | 1859.9 | 1845.4 | 1842.6 | 1851.5 | 1851.5 | 1850.5 | 1850.4 | 1850.4 | 1850.4 |
| gdb 2164 | 1859.8 <sup>a</sup> | 1849.1 | 1812.0 | 1833.7 | 1854.3 | 1838.8 | 1830.7 | 1845.9 | 1845.9 | 1841.3 | 1841.3 | 1841.3 | 1841.3 |
| gdb 2165 | 1871.7 <sup>a</sup> | 1861.3 | 1824.6 | 1844.7 | 1857.8 | 1842.5 | 1840.7 | 1852.1 | 1852.1 | 1850.6 | 1850.6 | 1850.6 | 1850.6 |
| gdb 2166 | 1877.9 <sup>a</sup> | 1873.6 | 1836.9 | 1855.1 | 1861.9 | 1847.8 | 1852.2 | 1857.3 | 1857.3 | 1859.3 | 1859.3 | 1859.3 | 1859.3 |
| gdb 2167 | 1889.9 <sup>a</sup> | 1878.6 | 1865.7 | 1875.0 | 1890.7 | 1879.0 | 1868.7 | 1886.1 | 1886.1 | 1877.4 | 1877.4 | 1877.4 | 1877.4 |
| gdb 2168 | 1884.6 <sup>a</sup> | 1874.0 | 1857.9 | 1868.9 | 1883.5 | 1873.9 | 1862.9 | 1878.9 | 1878.9 | 1872.7 | 1872.7 | 1872.7 | 1872.7 |
| gdb 2169 | 1885.2 <sup>a</sup> | 1874.8 | 1858.9 | 1870.1 | 1883.9 | 1873.9 | 1863.7 | 1879.1 | 1879.1 | 1872.5 | 1872.5 | 1872.5 | 1872.5 |
| gdb 2170 | 1883.9 <sup>a</sup> | 1873.8 | 1858.9 | 1869.9 | 1886.2 | 1875.5 | 1863.7 | 1879.2 | 1879.2 | 1873.1 | 1873.1 | 1873.1 | 1873.1 |
| gdb 2171 | 1890.0 <sup>a</sup> | 1886.0 | 1872.9 | 1881.3 | 1889.4 | 1879.6 | 1874.0 | 1884.5 | 1884.5 | 1881.5 | 1881.5 | 1881.5 | 1881.5 |
| gdb 2172 | 1890.2 <sup>a</sup> | 1886.0 | 1871.9 | 1880.8 | 1886.2 | 1877.4 | 1872.6 | 1883.0 | 1883.0 | 1879.6 | 1879.6 | 1879.6 | 1879.6 |
| gdb 2173 | 1863.6 <sup>a</sup> | 1861.6 | 1833.9 | 1845.7 | 1861.7 | 1846.1 | 1836.2 | 1847.1 | 1847.1 | 1840.2 | 1840.2 | 1840.2 | 1840.2 |
| gdb 2174 | 1856.7 <sup>a</sup> | 1852.3 | 1823.4 | 1837.5 | 1857.5 | 1841.0 | 1832.3 | 1842.5 | 1842.5 | 1838.0 | 1838.0 | 1838.0 | 1838.0 |
| gdb 2175 | 1854.2 <sup>a</sup> | 1850.5 | 1822.9 | 1836.0 | 1857.2 | 1839.9 | 1830.8 | 1840.4 | 1840.4 | 1837.0 | 1837.0 | 1837.0 | 1837.0 |
| gdb 2176 | 1867.7 <sup>a</sup> | 1867.1 | 1836.2 | 1848.9 | 1859.5 | 1844.2 | 1842.7 | 1847.4 | 1847.4 | 1846.7 | 1846.7 | 1846.7 | 1846.7 |
| gdb 2177 | 1866.0 <sup>a</sup> | 1865.9 | 1836.4 | 1847.8 | 1859.2 | 1843.1 | 1841.6 | 1846.1 | 1846.1 | 1846.3 | 1846.4 | 1846.4 | 1846.4 |
| gdb 2178 | 1866.3 <sup>a</sup> | 1881.5 | 1849.0 | 1870.8 | 1882.0 | 1868.3 | 1851.5 | 1861.9 | 1861.9 | 1858.7 | 1858.7 | 1858.7 | 1858.7 |
| gdb 2179 | 1871.4 <sup>a</sup> | 1896.8 | 1866.7 | 1884.9 | 1889.1 | 1876.3 | 1865.0 | 1871.3 | 1871.3 | 1870.2 | 1870.2 | 1870.2 | 1870.2 |
| gdb 2180 | 1865.3 <sup>a</sup> | 1884.4 | 1851.0 | 1871.4 | 1880.9 | 1867.4 | 1852.1 | 1861.0 | 1861.0 | 1857.8 | 1857.8 | 1857.8 | 1857.8 |
| gdb 2181 | 1864.4 <sup>a</sup> | 1884.3 | 1849.6 | 1870.6 | 1878.8 | 1865.9 | 1852.8 | 1862.7 | 1862.7 | 1858.8 | 1858.8 | 1858.8 | 1858.8 |
| gdb 2182 | 1861.5 <sup>a</sup> | 1883.3 | 1850.0 | 1870.3 | 1877.2 | 1863.8 | 1849.8 | 1859.6 | 1859.6 | 1855.5 | 1855.5 | 1855.5 | 1855.5 |
| gdb 2183 | 1869.3 <sup>a</sup> | 1899.2 | 1866.3 | 1884.1 | 1885.7 | 1873.7 | 1865.7 | 1870.5 | 1870.5 | 1869.5 | 1869.5 | 1869.5 | 1869.5 |
| gdb 2184 | 1898.2 <sup>a</sup> | 1886.7 | 1878.2 | 1886.2 | 1904.0 | 1894.7 | 1882.7 | 1901.1 | 1901.1 | 1891.9 | 1891.9 | 1891.9 | 1891.9 |
| gdb 2185 | 1900.2 <sup>a</sup> | 1893.0 | 1883.8 | 1892.3 | 1905.6 | 1896.3 | 1885.5 | 1903.8 | 1903.8 | 1894.2 | 1894.2 | 1894.2 | 1894.2 |
| gdb 2186 | 1898.0 <sup>a</sup> | 1887.5 | 1876.2 | 1886.0 | 1900.6 | 1891.9 | 1878.6 | 1894.5 | 1894.5 | 1887.6 | 1887.6 | 1887.6 | 1887.6 |
| gdb 2187 | 1898.9 <sup>a</sup> | 1895.7 | 1886.8 | 1894.2 | 1902.4 | 1894.2 | 1884.7 | 1894.7 | 1894.7 | 1891.0 | 1891.0 | 1891.0 | 1891.0 |
| gdb 2188 | 1875.2 <sup>a</sup> | 1889.6 | 1869.4 | 1881.8 | 1894.5 | 1883.0 | 1867.1 | 1876.7 | 1876.7 | 1870.8 | 1870.8 | 1870.8 | 1870.8 |
| gdb 2189 | 1875.3 <sup>a</sup> | 1890.0 | 1870.1 | 1882.8 | 1895.1 | 1883.6 | 1866.8 | 1876.7 | 1876.7 | 1870.7 | 1870.7 | 1870.7 | 1870.7 |
| gdb 2190 | 1875.5 <sup>a</sup> | 1904.3 | 1885.8 | 1894.9 | 1900.7 | 1890.2 | 1879.2 | 1885.6 | 1885.6 | 1881.8 | 1881.8 | 1881.8 | 1881.8 |
| gdb 2191 | 1879.9 <sup>a</sup> | 1900.8 | 1881.3 | 1891.8 | 1899.9 | 1889.2 | 1877.8 | 1881.8 | 1881.8 | 1879.2 | 1879.2 | 1879.2 | 1879.2 |
| gdb 2192 | 1898.0 <sup>a</sup> | 1889.1 | 1876.9 | 1886.9 | 1901.3 | 1892.6 | 1878.8 | 1894.9 | 1894.9 | 1888.1 | 1888.1 | 1888.1 | 1888.1 |
| gdb 2193 | 1898.8 <sup>a</sup> | 1893.9 | 1885.2 | 1893.1 | 1905.9 | 1895.7 | 1883.8 | 1902.8 | 1902.8 | 1892.8 | 1892.8 | 1892.8 | 1892.8 |
| gdb 2194 | 1896.7 <sup>a</sup> | 1893.4 | 1886.5 | 1893.6 | 1905.3 | 1894.3 | 1881.2 | 1900.6 | 1900.6 | 1890.5 | 1890.5 | 1890.5 | 1890.5 |
| gdb 2195 | 1897.3 <sup>a</sup> | 1887.4 | 1880.0 | 1887.4 | 1904.7 | 1894.3 | 1880.5 | 1899.9 | 1899.9 | 1890.4 | 1890.4 | 1890.4 | 1890.4 |
| gdb 2196 | 1900.8 <sup>a</sup> | 1901.2 | 1891.1 | 1898.4 | 1905.8 | 1897.8 | 1889.9 | 1901.4 | 1901.4 | 1897.5 | 1897.5 | 1897.5 | 1897.5 |
| gdb 2197 | 1898.4 <sup>a</sup> | 1895.6 | 1887.7 | 1895.1 | 1904.1 | 1895.3 | 1886.3 | 1898.4 | 1898.4 | 1894.7 | 1894.7 | 1894.7 | 1894.7 |
| gdb 2198 | 1898.6 <sup>a</sup> | 1874.6 | 1832.2 | 1853.9 | 1857.5 | 1844.2 | 1837.3 | 1841.0 | 1841.0 | 1845.3 | 1845.3 | 1845.3 | 1845.3 |
| gdb 2199 | 1855.9 <sup>a</sup> | 1872.9 | 1830.6 | 1853.0 | 1855.4 | 1841.7 | 1835.9 | 1840.1 | 1840.1 | 1844.6 | 1844.6 | 1844.6 | 1844.6 |
| gdb 2200 | 1850.3 <sup>a</sup> | 1859.4 | 1815.2 | 1840.6 | 1851.0 | 1836.5 | 1823.3 | 1833.3 | 1833.3 | 1833.4 | 1833.4 | 1833.4 | 1833.4 |
| gdb 2201 | 1852.4 <sup>a</sup> | 1860.7 | 1815.5 | 1840.9 | 1852.8 | 1838.5 | 1824.4 | 1833.0 | 1833.0 | 1833.9 | 1833.9 | 1833.9 | 1833.9 |
| gdb 2202 | 1890.8 <sup>a</sup> | 1887.9 | 1871.7 | 1882.7 | 1889.2 | 1880.5 | 1870.2 | 1880.8 | 1880.8 | 1880.5 | 1880.5 | 1880.5 | 1880.5 |
| gdb 2203 | 1890.6 <sup>a</sup> | 1882.4 | 1867.0 | 1878.9 | 1890.7 | 1880.5 | 1864.0 | 1881.7 | 1881.7 | 1875.3 | 1875.3 | 1875.3 | 1875.3 |
| gdb 2204 | 1893.5 <sup>a</sup> | 1882.5 | 1865.7 | 1878.4 | 1891.3 | 1881.7 | 1866.0 | 1883.6 | 1883.6 | 1877.4 | 1877.4 | 1877.4 | 1877.4 |

... continued on next page ...

Table S26: ... continued from previous page. ...

| Molecule | Ref.                | MNDO   | AMI    | PM3    | PM6    | PM7    | OM1    |        | OM2    |        | OM3    |        | D3T    |
|----------|---------------------|--------|--------|--------|--------|--------|--------|--------|--------|--------|--------|--------|--------|
|          |                     |        |        |        |        |        | OM1    | OM2    | OM3    | OM3    | D2     | D3     |        |
| gdb 2205 | 1893.3 <sup>a</sup> | 1888.1 | 1870.7 | 1882.5 | 1889.6 | 1882.0 | 1872.2 | 1882.6 | 1882.6 | 1882.6 | 1882.6 | 1882.6 | 1882.6 |
| gdb 2206 | 1896.6 <sup>a</sup> | 1900.2 | 1884.8 | 1893.9 | 1891.2 | 1884.5 | 1882.4 | 1885.6 | 1885.6 | 1885.6 | 1888.7 | 1888.7 | 1888.7 |
| gdb 2207 | 1882.9 <sup>a</sup> | 1890.1 | 1883.5 | 1886.2 | 1894.7 | 1887.0 | 1870.3 | 1879.7 | 1879.7 | 1879.7 | 1875.7 | 1875.7 | 1875.7 |
| gdb 2208 | 1891.4 <sup>a</sup> | 1896.5 | 1893.1 | 1893.1 | 1905.0 | 1895.1 | 1880.3 | 1891.2 | 1891.2 | 1891.2 | 1884.4 | 1884.3 | 1884.3 |
| gdb 2209 | 1893.8 <sup>a</sup> | 1896.6 | 1891.7 | 1892.3 | 1905.6 | 1896.3 | 1882.3 | 1893.1 | 1893.1 | 1893.1 | 1886.5 | 1886.4 | 1886.5 |
| gdb 2210 | 1885.5 <sup>a</sup> | 1890.1 | 1881.9 | 1885.5 | 1895.4 | 1888.2 | 1872.4 | 1881.6 | 1881.6 | 1881.6 | 1877.9 | 1877.9 | 1877.9 |
| gdb 2211 | 1890.6 <sup>a</sup> | 1897.0 | 1888.3 | 1890.4 | 1902.0 | 1893.2 | 1878.8 | 1888.1 | 1888.1 | 1888.1 | 1882.5 | 1882.5 | 1882.5 |
| gdb 2212 | 1893.6 <sup>a</sup> | 1901.6 | 1896.5 | 1896.4 | 1904.2 | 1895.9 | 1888.0 | 1892.8 | 1892.8 | 1892.8 | 1892.2 | 1892.2 | 1892.2 |
| gdb 2213 | 1891.1 <sup>a</sup> | 1900.9 | 1894.6 | 1895.6 | 1898.9 | 1891.5 | 1883.5 | 1887.0 | 1887.0 | 1887.0 | 1887.0 | 1887.0 | 1887.0 |
| gdb 2214 | 1892.4 <sup>a</sup> | 1901.9 | 1893.6 | 1895.0 | 1901.5 | 1893.7 | 1885.0 | 1888.3 | 1888.3 | 1888.3 | 1888.8 | 1888.8 | 1888.8 |
| gdb 2215 | 1869.0 <sup>a</sup> | 1866.0 | 1835.1 | 1855.4 | 1868.4 | 1855.3 | 1846.6 | 1860.9 | 1860.9 | 1860.9 | 1857.7 | 1857.7 | 1857.7 |
| gdb 2216 | 1873.9 <sup>a</sup> | 1869.3 | 1836.9 | 1858.0 | 1868.3 | 1856.9 | 1850.0 | 1862.5 | 1862.5 | 1862.5 | 1859.9 | 1859.9 | 1859.9 |
| gdb 2217 | 1870.6 <sup>a</sup> | 1858.4 | 1823.2 | 1846.4 | 1865.5 | 1853.5 | 1840.7 | 1859.5 | 1859.5 | 1859.5 | 1853.2 | 1853.2 | 1853.2 |
| gdb 2218 | 1874.8 <sup>a</sup> | 1878.8 | 1849.7 | 1868.5 | 1870.4 | 1859.5 | 1856.9 | 1864.4 | 1864.4 | 1864.4 | 1865.0 | 1865.0 | 1865.0 |
| gdb 2219 | 1894.3 <sup>a</sup> | 1887.6 | 1881.0 | 1887.3 | 1903.1 | 1892.7 | 1879.0 | 1897.7 | 1897.7 | 1897.7 | 1888.1 | 1888.1 | 1888.1 |
| gdb 2220 | 1898.9 <sup>a</sup> | 1894.4 | 1885.1 | 1892.9 | 1905.3 | 1895.5 | 1884.4 | 1902.9 | 1902.9 | 1902.9 | 1893.0 | 1893.0 | 1893.0 |
| gdb 2221 | 1898.2 <sup>a</sup> | 1889.9 | 1876.5 | 1886.1 | 1900.4 | 1892.2 | 1879.9 | 1895.5 | 1895.5 | 1895.5 | 1888.7 | 1888.7 | 1888.7 |
| gdb 2222 | 1894.1 <sup>a</sup> | 1895.6 | 1886.1 | 1893.4 | 1901.0 | 1893.0 | 1885.0 | 1896.2 | 1896.2 | 1896.2 | 1892.4 | 1892.4 | 1892.4 |
| gdb 2223 | 1898.0 <sup>a</sup> | 1898.8 | 1888.1 | 1895.3 | 1900.2 | 1892.9 | 1885.8 | 1894.8 | 1894.8 | 1894.8 | 1891.6 | 1891.6 | 1891.6 |
| gdb 2224 | 1894.3 <sup>a</sup> | 1873.5 | 1870.1 | 1880.3 | 1891.9 | 1883.2 | 1874.4 | 1898.6 | 1898.6 | 1898.6 | 1886.9 | 1886.9 | 1886.9 |
| gdb 2225 | 1892.1 <sup>a</sup> | 1866.2 | 1859.5 | 1869.9 | 1888.8 | 1881.8 | 1870.7 | 1892.9 | 1892.9 | 1892.9 | 1884.9 | 1884.9 | 1884.9 |
| gdb 2226 | 1891.7 <sup>a</sup> | 1873.4 | 1871.3 | 1880.5 | 1891.2 | 1881.8 | 1872.0 | 1896.5 | 1896.5 | 1896.5 | 1884.7 | 1884.7 | 1884.7 |
| gdb 2227 | 1896.0 <sup>a</sup> | 1873.5 | 1869.1 | 1879.9 | 1891.7 | 1883.9 | 1876.0 | 1899.9 | 1899.9 | 1899.9 | 1888.6 | 1888.6 | 1888.6 |
| gdb 2228 | 1891.2 <sup>a</sup> | 1875.4 | 1870.6 | 1879.9 | 1887.9 | 1881.8 | 1875.3 | 1891.2 | 1891.2 | 1891.2 | 1886.6 | 1886.6 | 1886.6 |
| gdb 2229 | 1882.0 <sup>a</sup> | 1873.9 | 1858.8 | 1869.0 | 1882.4 | 1872.3 | 1860.6 | 1876.5 | 1876.5 | 1876.5 | 1870.0 | 1870.0 | 1870.0 |
| gdb 2230 | 1887.6 <sup>a</sup> | 1879.0 | 1866.6 | 1874.9 | 1889.6 | 1877.6 | 1867.1 | 1884.0 | 1884.0 | 1884.0 | 1875.1 | 1875.1 | 1875.1 |
| gdb 2231 | 1885.1 <sup>a</sup> | 1874.7 | 1858.6 | 1869.8 | 1883.5 | 1873.7 | 1863.5 | 1878.8 | 1878.8 | 1878.8 | 1872.2 | 1872.2 | 1872.2 |
| gdb 2232 | 1883.9 <sup>a</sup> | 1874.2 | 1858.6 | 1869.4 | 1885.7 | 1875.3 | 1864.1 | 1879.2 | 1879.2 | 1879.2 | 1873.1 | 1873.1 | 1873.1 |
| gdb 2233 | 1890.1 <sup>a</sup> | 1885.9 | 1872.3 | 1881.0 | 1886.1 | 1877.5 | 1872.8 | 1882.7 | 1882.7 | 1882.7 | 1879.7 | 1879.7 | 1879.7 |
| gdb 2234 | 1890.5 <sup>a</sup> | 1886.5 | 1873.5 | 1881.4 | 1888.7 | 1879.5 | 1874.4 | 1884.2 | 1884.2 | 1884.2 | 1881.5 | 1881.5 | 1881.5 |
| gdb 2235 | 1890.0 <sup>a</sup> | 1884.9 | 1868.3 | 1877.9 | 1887.5 | 1878.0 | 1873.4 | 1883.1 | 1883.1 | 1883.1 | 1880.0 | 1880.0 | 1880.0 |
| gdb 2236 | 1876.2 <sup>a</sup> | 1891.8 | 1870.8 | 1883.4 | 1895.9 | 1884.1 | 1867.2 | 1876.9 | 1876.9 | 1876.9 | 1871.2 | 1871.2 | 1871.2 |
| gdb 2237 | 1879.0 <sup>a</sup> | 1906.6 | 1887.6 | 1896.6 | 1903.0 | 1891.5 | 1880.9 | 1886.8 | 1886.8 | 1886.8 | 1883.4 | 1883.4 | 1883.4 |
| gdb 2238 | 1871.6 <sup>a</sup> | 1880.9 | 1859.7 | 1871.0 | 1880.4 | 1869.0 | 1858.6 | 1867.4 | 1867.4 | 1867.4 | 1866.3 | 1866.3 | 1866.3 |
| gdb 2239 | 1873.7 <sup>a</sup> | 1880.6 | 1859.9 | 1871.3 | 1880.5 | 1868.8 | 1859.4 | 1868.3 | 1868.3 | 1868.3 | 1867.0 | 1867.0 | 1867.0 |
| gdb 2240 | 1873.2 <sup>a</sup> | 1878.2 | 1852.5 | 1867.2 | 1877.2 | 1867.0 | 1855.0 | 1860.4 | 1860.4 | 1860.4 | 1861.0 | 1861.0 | 1861.0 |
| gdb 2241 | 1865.9 <sup>a</sup> | 1866.2 | 1840.3 | 1856.8 | 1869.9 | 1859.9 | 1841.8 | 1853.1 | 1853.1 | 1853.1 | 1850.1 | 1850.1 | 1850.1 |
| gdb 2242 | 1874.0 <sup>a</sup> | 1880.2 | 1857.0 | 1869.5 | 1877.9 | 1867.3 | 1857.6 | 1866.0 | 1866.0 | 1866.0 | 1865.2 | 1865.2 | 1865.2 |
| gdb 2243 | 1879.2 <sup>a</sup> | 1893.0 | 1870.4 | 1880.7 | 1883.2 | 1873.5 | 1868.9 | 1870.7 | 1870.7 | 1870.7 | 1873.8 | 1873.8 | 1873.8 |
| gdb 2244 | 1873.7 <sup>a</sup> | 1885.1 | 1860.8 | 1872.3 | 1880.8 | 1869.3 | 1860.7 | 1868.1 | 1868.1 | 1868.1 | 1867.8 | 1867.7 | 1867.7 |
| gdb 2245 | 1872.1 <sup>a</sup> | 1884.7 | 1859.8 | 1871.7 | 1877.6 | 1866.6 | 1856.5 | 1863.7 | 1863.7 | 1863.7 | 1863.2 | 1863.2 | 1863.2 |
| gdb 2246 | 1870.5 <sup>a</sup> | 1883.6 | 1858.8 | 1871.0 | 1875.9 | 1865.0 | 1855.0 | 1862.0 | 1862.0 | 1862.0 | 1861.9 | 1861.9 | 1861.9 |
| gdb 2247 | 1871.7 <sup>a</sup> | 1884.0 | 1860.2 | 1871.8 | 1878.6 | 1867.1 | 1858.7 | 1866.5 | 1866.5 | 1866.5 | 1865.9 | 1865.9 | 1865.9 |
| gdb 2248 | 1873.0 <sup>a</sup> | 1882.1 | 1853.5 | 1868.0 | 1874.4 | 1864.0 | 1854.7 | 1859.7 | 1859.7 | 1859.7 | 1860.7 | 1860.7 | 1860.7 |
| gdb 2249 | 1864.3 <sup>a</sup> | 1871.2 | 1843.2 | 1858.8 | 1869.9 | 1859.4 | 1841.0 | 1851.2 | 1851.2 | 1851.2 | 1848.4 | 1848.4 | 1848.4 |

... continued on next page ...



Table S26: . . . continued from previous page. . . .

| Molecule | Ref.                | MNDO   | AMI    | PM3    | PM6    | PM7    | OM1    | OM2    |        | OM3    |        | D3T    |
|----------|---------------------|--------|--------|--------|--------|--------|--------|--------|--------|--------|--------|--------|
|          |                     |        |        |        |        |        |        | D2     | D3     | D2     | D3     |        |
| gdb 2295 | 1921.5 <sup>a</sup> | 1917.2 | 1917.2 | 1921.1 | 1918.8 | 1917.8 | 1916.3 | 1923.9 | 1923.9 | 1924.6 | 1924.6 | 1924.6 |
| gdb 2296 | 1884.3 <sup>a</sup> | 1895.5 | 1870.4 | 1890.1 | 1898.1 | 1888.6 | 1873.8 | 1884.3 | 1884.3 | 1882.9 | 1882.9 | 1882.9 |
| gdb 2297 | 1905.4 <sup>a</sup> | 1902.7 | 1876.8 | 1897.7 | 1907.2 | 1897.5 | 1885.1 | 1894.5 | 1894.5 | 1892.0 | 1892.0 | 1892.0 |
| gdb 2298 | 1888.3 <sup>a</sup> | 1908.4 | 1885.1 | 1902.1 | 1902.6 | 1894.8 | 1886.7 | 1894.1 | 1894.1 | 1894.4 | 1894.4 | 1894.4 |
| gdb 2299 | 1887.9 <sup>a</sup> | 1908.7 | 1885.0 | 1902.1 | 1904.9 | 1896.7 | 1887.4 | 1895.1 | 1895.1 | 1895.8 | 1895.8 | 1895.8 |
| gdb 2300 | 1881.7 <sup>a</sup> | 1894.6 | 1868.8 | 1888.8 | 1894.4 | 1885.6 | 1872.0 | 1882.5 | 1882.5 | 1880.7 | 1880.7 | 1880.7 |
| gdb 2301 | 1853.6 <sup>a</sup> | 1863.6 | 1836.6 | 1854.0 | 1862.3 | 1854.6 | 1845.4 | 1853.3 | 1853.3 | 1847.2 | 1847.2 | 1847.2 |
| gdb 2302 | 1848.9 <sup>a</sup> | 1850.3 | 1820.8 | 1840.4 | 1852.4 | 1844.4 | 1830.2 | 1841.8 | 1841.7 | 1833.3 | 1833.3 | 1833.3 |
| gdb 2303 | 1855.4 <sup>a</sup> | 1864.2 | 1836.2 | 1852.6 | 1865.1 | 1853.1 | 1842.1 | 1850.9 | 1850.9 | 1847.6 | 1847.6 | 1847.6 |
| gdb 2304 | 1858.6 <sup>a</sup> | 1877.5 | 1852.2 | 1866.6 | 1874.7 | 1863.4 | 1856.3 | 1861.2 | 1861.2 | 1860.8 | 1860.8 | 1860.8 |
| gdb 2305 | 1881.1 <sup>a</sup> | 1887.7 | 1868.8 | 1880.7 | 1883.4 | 1877.9 | 1871.4 | 1875.3 | 1875.3 | 1876.7 | 1876.7 | 1876.7 |
| gdb 2306 | 1870.4 <sup>a</sup> | 1874.6 | 1851.5 | 1866.7 | 1873.4 | 1865.7 | 1854.6 | 1859.4 | 1859.4 | 1860.4 | 1860.3 | 1860.3 |
| gdb 2307 | 1890.9 <sup>a</sup> | 1898.3 | 1884.1 | 1893.4 | 1899.1 | 1892.7 | 1881.1 | 1890.3 | 1890.3 | 1886.7 | 1886.7 | 1886.7 |
| gdb 2308 | 1890.1 <sup>a</sup> | 1898.3 | 1884.1 | 1893.4 | 1899.0 | 1892.7 | 1880.9 | 1890.2 | 1890.2 | 1886.6 | 1886.5 | 1886.5 |
| gdb 2309 | 1894.8 <sup>a</sup> | 1911.3 | 1899.2 | 1905.0 | 1907.7 | 1902.9 | 1895.8 | 1901.5 | 1901.5 | 1900.1 | 1900.1 | 1900.1 |
| gdb 2310 | 1876.3 <sup>a</sup> | 1892.9 | 1870.7 | 1886.8 | 1888.9 | 1882.5 | 1871.9 | 1877.8 | 1877.8 | 1875.2 | 1875.2 | 1875.2 |
| gdb 2311 | 1874.9 <sup>a</sup> | 1892.7 | 1870.3 | 1886.3 | 1886.6 | 1880.7 | 1871.6 | 1877.3 | 1877.3 | 1874.7 | 1874.6 | 1874.6 |
| gdb 2312 | 1882.0 <sup>a</sup> | 1907.2 | 1887.7 | 1900.9 | 1898.1 | 1893.9 | 1887.9 | 1890.7 | 1890.7 | 1890.3 | 1890.3 | 1890.3 |
| gdb 2313 | 1848.4 <sup>a</sup> | 1832.9 | 1808.4 | 1826.9 | 1846.5 | 1834.0 | 1819.9 | 1837.6 | 1837.6 | 1830.3 | 1830.3 | 1830.3 |
| gdb 2314 | 1840.7 <sup>a</sup> | 1820.9 | 1796.6 | 1817.2 | 1837.0 | 1822.3 | 1809.1 | 1826.0 | 1826.0 | 1821.5 | 1821.5 | 1821.5 |
| gdb 2315 | 1861.2 <sup>a</sup> | 1852.8 | 1829.3 | 1843.5 | 1862.4 | 1851.2 | 1841.2 | 1854.8 | 1854.8 | 1850.8 | 1850.8 | 1850.8 |
| gdb 2316 | 1854.2 <sup>a</sup> | 1842.8 | 1820.7 | 1835.7 | 1849.6 | 1837.4 | 1828.3 | 1840.1 | 1840.1 | 1838.1 | 1838.1 | 1838.1 |
| gdb 2317 | 1838.5 <sup>a</sup> | 1824.4 | 1804.6 | 1820.0 | 1841.1 | 1826.6 | 1811.4 | 1826.4 | 1826.4 | 1821.2 | 1821.2 | 1821.2 |
| gdb 2318 | 1837.6 <sup>a</sup> | 1822.9 | 1800.5 | 1818.9 | 1837.3 | 1824.2 | 1810.6 | 1826.0 | 1826.0 | 1821.3 | 1821.2 | 1821.2 |
| gdb 2319 | 1842.7 <sup>a</sup> | 1825.6 | 1807.8 | 1822.2 | 1844.8 | 1830.7 | 1814.4 | 1829.5 | 1829.5 | 1824.5 | 1824.5 | 1824.5 |
| gdb 2320 | 1848.8 <sup>a</sup> | 1836.1 | 1810.6 | 1828.6 | 1846.4 | 1835.2 | 1820.4 | 1836.4 | 1836.3 | 1829.0 | 1829.0 | 1829.0 |
| gdb 2321 | 1850.7 <sup>a</sup> | 1845.3 | 1823.4 | 1838.1 | 1851.5 | 1840.6 | 1830.5 | 1841.8 | 1841.8 | 1840.2 | 1840.1 | 1840.1 |
| gdb 2322 | 1855.3 <sup>a</sup> | 1847.8 | 1832.3 | 1842.1 | 1859.9 | 1847.7 | 1834.8 | 1846.5 | 1846.5 | 1844.2 | 1844.1 | 1844.1 |
| gdb 2323 | 1861.3 <sup>a</sup> | 1855.9 | 1831.2 | 1845.2 | 1861.0 | 1850.8 | 1841.3 | 1853.0 | 1853.0 | 1848.8 | 1848.7 | 1848.7 |
| gdb 2324 | 1853.0 <sup>a</sup> | 1846.0 | 1822.9 | 1837.7 | 1849.1 | 1838.3 | 1828.9 | 1838.3 | 1838.3 | 1836.7 | 1836.7 | 1836.7 |
| gdb 2325 | 1852.1 <sup>a</sup> | 1872.2 | 1833.9 | 1855.3 | 1867.5 | 1852.9 | 1834.7 | 1842.5 | 1842.5 | 1837.0 | 1837.0 | 1837.0 |
| gdb 2326 | 1851.1 <sup>a</sup> | 1871.8 | 1836.1 | 1856.4 | 1870.4 | 1855.0 | 1834.6 | 1841.7 | 1841.7 | 1836.7 | 1836.7 | 1836.7 |
| gdb 2327 | 1854.7 <sup>a</sup> | 1871.7 | 1832.9 | 1855.3 | 1867.4 | 1854.0 | 1835.5 | 1843.6 | 1843.6 | 1838.7 | 1838.7 | 1838.7 |
| gdb 2328 | 1854.4 <sup>a</sup> | 1872.6 | 1833.3 | 1855.7 | 1867.7 | 1854.3 | 1835.9 | 1844.1 | 1844.1 | 1839.3 | 1839.3 | 1839.3 |
| gdb 2329 | 1849.8 <sup>a</sup> | 1871.9 | 1835.0 | 1855.5 | 1866.2 | 1851.3 | 1833.0 | 1840.7 | 1840.6 | 1835.1 | 1835.1 | 1835.1 |
| gdb 2330 | 1855.7 <sup>a</sup> | 1887.5 | 1854.4 | 1869.8 | 1880.7 | 1866.7 | 1850.0 | 1854.2 | 1854.1 | 1851.3 | 1851.3 | 1851.3 |
| gdb 2331 | 1859.0 <sup>a</sup> | 1888.4 | 1852.0 | 1870.4 | 1878.1 | 1865.3 | 1851.4 | 1855.4 | 1855.4 | 1852.7 | 1852.6 | 1852.6 |
| gdb 2332 | 1858.4 <sup>a</sup> | 1889.5 | 1852.5 | 1870.6 | 1877.4 | 1864.6 | 1851.3 | 1856.0 | 1856.0 | 1853.0 | 1853.0 | 1853.0 |
| gdb 2333 | 1870.7 <sup>a</sup> | 1880.6 | 1868.9 | 1873.2 | 1885.3 | 1876.4 | 1859.0 | 1867.5 | 1867.5 | 1861.7 | 1861.7 | 1861.7 |
| gdb 2334 | 1879.4 <sup>a</sup> | 1897.8 | 1887.9 | 1888.3 | 1897.2 | 1890.3 | 1876.5 | 1882.0 | 1882.0 | 1878.9 | 1878.9 | 1878.9 |
| gdb 2335 | 1902.1 <sup>a</sup> | 1911.5 | 1899.4 | 1909.0 | 1915.3 | 1909.1 | 1899.0 | 1906.0 | 1906.0 | 1904.8 | 1904.7 | 1904.7 |
| gdb 2336 | 1897.6 <sup>a</sup> | 1914.1 | 1901.6 | 1910.8 | 1915.6 | 1910.5 | 1902.1 | 1911.1 | 1911.1 | 1909.0 | 1909.0 | 1909.0 |
| gdb 2337 | 1913.3 <sup>a</sup> | 1921.8 | 1912.4 | 1921.6 | 1924.3 | 1916.7 | 1909.6 | 1916.4 | 1916.4 | 1913.1 | 1913.1 | 1913.1 |
| gdb 2338 | 1895.5 <sup>a</sup> | 1910.4 | 1897.7 | 1906.9 | 1908.3 | 1902.8 | 1894.0 | 1900.4 | 1900.4 | 1898.8 | 1898.8 | 1898.8 |
| gdb 2339 | 1903.9 <sup>a</sup> | 1924.6 | 1915.0 | 1921.3 | 1923.7 | 1918.9 | 1912.8 | 1917.3 | 1917.3 | 1918.3 | 1918.3 | 1918.3 |

. . . continued on next page . . .







Table S26: . . . continued from previous page. . . .

| Molecule | Ref.                | MNDO   | AMI    | PM3    | PM6    | PM7    | OM1    | OM2    |        | OM3    |        | D3T    |
|----------|---------------------|--------|--------|--------|--------|--------|--------|--------|--------|--------|--------|--------|
|          |                     |        |        |        |        |        |        | D2     | D3     | D2     | D3     |        |
| gdb 2430 | 1882.1 <sup>a</sup> | 1872.4 | 1858.9 | 1869.1 | 1881.8 | 1871.5 | 1860.9 | 1876.6 | 1876.6 | 1869.6 | 1869.6 | 1869.6 |
| gdb 2431 | 1883.9 <sup>a</sup> | 1871.8 | 1857.4 | 1868.5 | 1883.0 | 1873.4 | 1861.9 | 1878.6 | 1878.6 | 1872.0 | 1872.0 | 1872.0 |
| gdb 2432 | 1890.4 <sup>a</sup> | 1876.8 | 1863.8 | 1873.8 | 1889.6 | 1879.1 | 1870.2 | 1887.5 | 1887.5 | 1878.9 | 1878.9 | 1878.9 |
| gdb 2433 | 1887.3 <sup>a</sup> | 1883.3 | 1868.9 | 1878.3 | 1887.2 | 1878.2 | 1872.6 | 1882.8 | 1882.8 | 1879.2 | 1879.2 | 1879.2 |
| gdb 2434 | 1888.8 <sup>a</sup> | 1883.6 | 1878.9 | 1879.6 | 1885.5 | 1877.1 | 1871.7 | 1882.4 | 1882.4 | 1879.0 | 1879.0 | 1879.0 |
| gdb 2435 | 1878.2 <sup>a</sup> | 1871.3 | 1854.3 | 1864.6 | 1878.3 | 1866.8 | 1857.1 | 1871.4 | 1871.4 | 1865.9 | 1865.9 | 1865.9 |
| gdb 2436 | 1880.3 <sup>a</sup> | 1870.9 | 1853.1 | 1864.2 | 1879.3 | 1868.3 | 1859.5 | 1873.8 | 1873.8 | 1868.6 | 1868.6 | 1868.6 |
| gdb 2437 | 1890.3 <sup>a</sup> | 1884.4 | 1868.0 | 1877.1 | 1884.9 | 1875.3 | 1872.2 | 1880.7 | 1880.7 | 1878.6 | 1878.6 | 1878.6 |
| gdb 2438 | 1888.0 <sup>a</sup> | 1884.2 | 1866.7 | 1876.5 | 1883.3 | 1873.5 | 1870.4 | 1879.2 | 1879.2 | 1876.5 | 1876.5 | 1876.5 |
| gdb 2439 | 1871.3 <sup>a</sup> | 1882.9 | 1859.5 | 1870.9 | 1879.8 | 1868.5 | 1859.2 | 1866.8 | 1866.7 | 1865.8 | 1865.8 | 1865.8 |
| gdb 2440 | 1870.6 <sup>a</sup> | 1880.1 | 1853.5 | 1867.4 | 1875.2 | 1865.1 | 1854.0 | 1858.0 | 1858.0 | 1858.7 | 1858.7 | 1858.7 |
| gdb 2441 | 1870.1 <sup>a</sup> | 1878.8 | 1853.2 | 1866.9 | 1872.8 | 1861.9 | 1852.4 | 1857.5 | 1857.5 | 1858.0 | 1857.9 | 1857.9 |
| gdb 2442 | 1871.2 <sup>a</sup> | 1881.5 | 1859.0 | 1870.5 | 1877.4 | 1866.3 | 1858.2 | 1866.0 | 1866.0 | 1865.0 | 1865.0 | 1865.0 |
| gdb 2443 | 1872.2 <sup>a</sup> | 1880.9 | 1856.1 | 1868.9 | 1875.9 | 1865.5 | 1856.1 | 1863.3 | 1863.3 | 1863.1 | 1863.1 | 1863.1 |
| gdb 2444 | 1863.4 <sup>a</sup> | 1868.5 | 1841.6 | 1857.2 | 1868.6 | 1858.4 | 1840.8 | 1850.9 | 1850.9 | 1847.8 | 1847.8 | 1847.8 |
| gdb 2445 | 1876.5 <sup>a</sup> | 1893.0 | 1869.0 | 1879.8 | 1881.0 | 1871.7 | 1867.9 | 1868.8 | 1868.8 | 1872.6 | 1872.6 | 1872.6 |
| gdb 2446 | 1889.0 <sup>a</sup> | 1894.3 | 1889.2 | 1890.8 | 1901.0 | 1891.8 | 1876.3 | 1886.9 | 1886.9 | 1880.5 | 1880.5 | 1880.5 |
| gdb 2447 | 1891.9 <sup>a</sup> | 1894.8 | 1892.8 | 1892.7 | 1904.1 | 1894.8 | 1880.3 | 1891.7 | 1891.7 | 1884.3 | 1884.3 | 1884.3 |
| gdb 2448 | 1885.4 <sup>a</sup> | 1888.2 | 1881.1 | 1884.5 | 1894.8 | 1887.8 | 1872.4 | 1882.0 | 1882.0 | 1878.0 | 1878.0 | 1878.0 |
| gdb 2449 | 1894.0 <sup>a</sup> | 1900.2 | 1893.8 | 1895.0 | 1902.4 | 1895.2 | 1886.1 | 1890.4 | 1890.4 | 1890.2 | 1890.2 | 1890.2 |
| gdb 2450 | 1894.0 <sup>a</sup> | 1900.2 | 1896.2 | 1895.9 | 1903.1 | 1895.6 | 1887.8 | 1893.3 | 1893.3 | 1892.0 | 1892.0 | 1892.0 |
| gdb 2451 | 1880.8 <sup>a</sup> | 1871.9 | 1858.9 | 1868.6 | 1883.4 | 1873.1 | 1861.9 | 1877.4 | 1877.4 | 1870.7 | 1870.7 | 1870.7 |
| gdb 2452 | 1886.1 <sup>a</sup> | 1875.7 | 1865.8 | 1874.0 | 1888.1 | 1876.6 | 1865.7 | 1883.6 | 1883.6 | 1874.3 | 1874.3 | 1874.3 |
| gdb 2453 | 1884.1 <sup>a</sup> | 1872.8 | 1857.5 | 1868.1 | 1882.3 | 1872.9 | 1864.1 | 1879.5 | 1879.5 | 1872.6 | 1872.6 | 1872.6 |
| gdb 2454 | 1882.9 <sup>a</sup> | 1870.7 | 1856.6 | 1867.3 | 1882.0 | 1872.8 | 1861.9 | 1878.6 | 1878.6 | 1872.0 | 1872.0 | 1872.0 |
| gdb 2455 | 1888.7 <sup>a</sup> | 1885.0 | 1871.7 | 1880.1 | 1888.6 | 1880.2 | 1875.4 | 1884.9 | 1884.9 | 1881.6 | 1881.6 | 1881.6 |
| gdb 2456 | 1887.8 <sup>a</sup> | 1882.0 | 1868.6 | 1877.4 | 1888.4 | 1879.9 | 1873.9 | 1884.9 | 1884.9 | 1881.5 | 1881.5 | 1881.5 |
| gdb 2457 | 1887.3 <sup>a</sup> | 1883.1 | 1871.7 | 1879.4 | 1887.1 | 1878.7 | 1872.7 | 1883.9 | 1883.9 | 1880.5 | 1880.5 | 1880.5 |
| gdb 2458 | 1884.1 <sup>a</sup> | 1890.3 | 1883.3 | 1885.5 | 1895.7 | 1886.5 | 1877.1 | 1887.4 | 1887.4 | 1882.8 | 1882.8 | 1882.8 |
| gdb 2459 | 1891.6 <sup>a</sup> | 1896.0 | 1892.3 | 1892.3 | 1903.6 | 1892.4 | 1884.8 | 1897.1 | 1897.1 | 1889.4 | 1889.4 | 1889.4 |
| gdb 2460 | 1881.3 <sup>a</sup> | 1889.1 | 1878.6 | 1882.8 | 1890.3 | 1882.1 | 1872.8 | 1882.0 | 1882.0 | 1878.1 | 1878.1 | 1878.1 |
| gdb 2461 | 1886.2 <sup>a</sup> | 1890.4 | 1881.7 | 1884.7 | 1896.7 | 1887.7 | 1878.5 | 1888.7 | 1888.7 | 1884.6 | 1884.6 | 1884.6 |
| gdb 2462 | 1888.6 <sup>a</sup> | 1900.7 | 1891.6 | 1893.6 | 1897.3 | 1889.6 | 1886.4 | 1889.9 | 1889.9 | 1889.8 | 1889.8 | 1889.8 |
| gdb 2463 | 1891.3 <sup>a</sup> | 1901.1 | 1893.9 | 1895.2 | 1902.5 | 1894.0 | 1890.2 | 1895.2 | 1895.2 | 1894.5 | 1894.5 | 1894.5 |
| gdb 2464 | 1890.3 <sup>a</sup> | 1901.4 | 1892.9 | 1894.4 | 1900.8 | 1891.9 | 1889.3 | 1893.8 | 1893.8 | 1893.1 | 1893.1 | 1893.1 |
| gdb 2465 | 1836.2 <sup>a</sup> | 1821.2 | 1798.8 | 1813.0 | 1835.1 | 1819.4 | 1810.3 | 1825.8 | 1825.8 | 1819.8 | 1819.8 | 1819.8 |
| gdb 2466 | 1831.9 <sup>a</sup> | 1811.0 | 1785.6 | 1803.9 | 1828.4 | 1812.3 | 1804.2 | 1818.1 | 1818.1 | 1814.3 | 1814.3 | 1814.3 |
| gdb 2467 | 1840.1 <sup>a</sup> | 1820.8 | 1794.4 | 1810.4 | 1830.3 | 1814.1 | 1808.1 | 1824.2 | 1824.2 | 1818.2 | 1818.2 | 1818.2 |
| gdb 2468 | 1849.2 <sup>a</sup> | 1838.6 | 1812.7 | 1826.1 | 1845.7 | 1831.9 | 1827.9 | 1837.5 | 1837.5 | 1835.2 | 1835.2 | 1835.2 |
| gdb 2469 | 1847.2 <sup>a</sup> | 1834.4 | 1807.7 | 1822.6 | 1838.5 | 1824.2 | 1820.6 | 1830.3 | 1830.3 | 1830.1 | 1830.1 | 1830.1 |
| gdb 2470 | 1845.9 <sup>a</sup> | 1835.0 | 1812.9 | 1824.8 | 1841.7 | 1826.6 | 1821.2 | 1830.7 | 1830.7 | 1829.9 | 1829.9 | 1829.9 |
| gdb 2471 | 1886.6 <sup>a</sup> | 1889.5 | 1889.6 | 1890.6 | 1899.3 | 1893.3 | 1882.3 | 1893.7 | 1893.7 | 1887.9 | 1887.9 | 1887.9 |
| gdb 2472 | 1893.4 <sup>a</sup> | 1898.3 | 1890.4 | 1893.4 | 1901.5 | 1895.6 | 1886.8 | 1897.9 | 1897.9 | 1890.9 | 1890.9 | 1890.9 |
| gdb 2473 | 1895.6 <sup>a</sup> | 1908.8 | 1905.9 | 1903.7 | 1908.5 | 1903.7 | 1895.7 | 1902.7 | 1902.7 | 1900.4 | 1900.4 | 1900.4 |
| gdb 2474 | 1869.6 <sup>a</sup> | 1871.1 | 1854.6 | 1864.2 | 1873.8 | 1866.5 | 1859.3 | 1867.8 | 1867.8 | 1859.7 | 1859.7 | 1859.7 |

. . . continued on next page . . .





Table S26: . . . continued from previous page. . . .

| Molecule | Ref.                | MNDO   | AMI    | PM3    | PM6    | PM7    | OM1    | OM2    |        | OM3    |        | D3T    |
|----------|---------------------|--------|--------|--------|--------|--------|--------|--------|--------|--------|--------|--------|
|          |                     |        |        |        |        |        |        | D2     | D3     | D2     | D3     |        |
| gdb 2565 | 1914.4 <sup>a</sup> | 1914.3 | 1910.0 | 1917.6 | 1917.7 | 1918.1 | 1910.9 | 1922.1 | 1922.1 | 1922.2 | 1922.2 | 1922.2 |
| gdb 2566 | 1899.1 <sup>a</sup> | 1905.7 | 1910.0 | 1907.0 | 1911.7 | 1910.5 | 1899.3 | 1905.8 | 1905.8 | 1904.2 | 1904.1 | 1904.1 |
| gdb 2567 | 1908.7 <sup>a</sup> | 1913.8 | 1915.6 | 1916.3 | 1919.6 | 1916.0 | 1905.9 | 1910.1 | 1910.1 | 1907.6 | 1907.6 | 1907.6 |
| gdb 2568 | 1918.8 <sup>a</sup> | 1915.3 | 1912.1 | 1918.5 | 1917.9 | 1918.1 | 1912.3 | 1923.1 | 1923.1 | 1923.3 | 1923.3 | 1923.3 |
| gdb 2569 | 1908.6 <sup>a</sup> | 1911.2 | 1912.6 | 1915.7 | 1910.6 | 1912.0 | 1908.9 | 1915.1 | 1915.1 | 1915.7 | 1915.6 | 1915.7 |
| gdb 2570 | 1897.6 <sup>a</sup> | 1906.8 | 1908.5 | 1906.7 | 1904.7 | 1905.4 | 1900.7 | 1903.8 | 1903.8 | 1902.1 | 1902.1 | 1902.1 |
| gdb 2571 | 1916.4 <sup>a</sup> | 1915.4 | 1918.8 | 1917.7 | 1920.8 | 1918.3 | 1913.0 | 1914.1 | 1914.1 | 1912.1 | 1912.1 | 1912.1 |
| gdb 2572 | 1889.0 <sup>a</sup> | 1900.8 | 1884.9 | 1892.2 | 1893.5 | 1888.6 | 1881.0 | 1885.8 | 1885.8 | 1889.0 | 1889.0 | 1889.0 |
| gdb 2573 | 1887.7 <sup>a</sup> | 1904.7 | 1888.7 | 1896.0 | 1899.7 | 1893.4 | 1881.2 | 1888.2 | 1888.2 | 1885.4 | 1885.4 | 1885.4 |
| gdb 2574 | 1889.1 <sup>a</sup> | 1905.4 | 1888.7 | 1895.9 | 1899.5 | 1893.7 | 1882.2 | 1888.5 | 1888.5 | 1885.4 | 1885.4 | 1885.4 |
| gdb 2575 | 1899.9 <sup>a</sup> | 1908.1 | 1910.2 | 1905.7 | 1913.6 | 1908.0 | 1894.9 | 1907.9 | 1907.9 | 1898.4 | 1898.4 | 1898.4 |
| gdb 2576 | 1901.1 <sup>a</sup> | 1908.4 | 1911.0 | 1906.3 | 1914.8 | 1909.2 | 1895.6 | 1908.3 | 1908.3 | 1899.2 | 1899.2 | 1899.2 |
| gdb 2577 | 1900.7 <sup>a</sup> | 1917.9 | 1913.4 | 1909.7 | 1914.7 | 1908.4 | 1899.6 | 1908.8 | 1908.8 | 1900.5 | 1900.4 | 1900.4 |
| gdb 2578 | 1908.8 <sup>a</sup> | 1913.9 | 1915.0 | 1916.1 | 1918.3 | 1914.3 | 1905.4 | 1910.1 | 1910.1 | 1907.2 | 1907.2 | 1907.1 |
| gdb 2579 | 1913.3 <sup>a</sup> | 1914.4 | 1917.8 | 1917.8 | 1921.4 | 1917.2 | 1907.1 | 1911.6 | 1911.6 | 1909.4 | 1909.4 | 1909.4 |
| gdb 2580 | 1897.8 <sup>a</sup> | 1906.6 | 1908.5 | 1906.7 | 1905.7 | 1905.8 | 1900.4 | 1903.9 | 1903.9 | 1902.4 | 1902.4 | 1902.4 |
| gdb 2581 | 1909.4 <sup>a</sup> | 1910.8 | 1910.4 | 1913.8 | 1907.9 | 1909.9 | 1908.5 | 1914.2 | 1914.1 | 1914.2 | 1914.2 | 1914.2 |
| gdb 2582 | 1900.8 <sup>a</sup> | 1899.5 | 1897.3 | 1903.4 | 1904.1 | 1904.2 | 1899.3 | 1910.1 | 1910.1 | 1906.9 | 1906.8 | 1906.8 |
| gdb 2583 | 1877.4 <sup>a</sup> | 1895.2 | 1877.9 | 1884.9 | 1891.5 | 1884.2 | 1870.8 | 1879.0 | 1879.0 | 1873.0 | 1873.0 | 1873.0 |
| gdb 2584 | 1874.4 <sup>a</sup> | 1880.0 | 1869.0 | 1870.8 | 1879.3 | 1876.2 | 1871.1 | 1876.3 | 1876.3 | 1868.4 | 1868.4 | 1868.4 |
| gdb 2585 | 1915.8 <sup>a</sup> | 1914.9 | 1916.9 | 1915.8 | 1918.7 | 1916.5 | 1912.4 | 1913.4 | 1913.4 | 1910.9 | 1910.9 | 1910.9 |
| gdb 2586 | 1896.1 <sup>a</sup> | 1904.7 | 1903.2 | 1904.7 | 1905.0 | 1903.8 | 1900.7 | 1904.4 | 1904.4 | 1903.5 | 1903.5 | 1903.5 |
| gdb 2587 | 1878.1 <sup>a</sup> | 1892.7 | 1881.8 | 1884.4 | 1891.5 | 1886.6 | 1873.6 | 1878.0 | 1878.0 | 1877.2 | 1877.2 | 1877.2 |
| gdb 2588 | 1877.2 <sup>a</sup> | 1898.4 | 1885.5 | 1888.4 | 1895.6 | 1888.4 | 1870.9 | 1876.0 | 1876.0 | 1870.7 | 1870.6 | 1870.6 |
| gdb 2589 | 1908.8 <sup>a</sup> | 1913.8 | 1915.5 | 1916.1 | 1919.6 | 1915.9 | 1905.7 | 1910.0 | 1909.9 | 1907.4 | 1907.4 | 1907.4 |
| gdb 2590 | 1899.0 <sup>a</sup> | 1905.6 | 1910.1 | 1907.3 | 1912.9 | 1911.0 | 1899.0 | 1905.9 | 1905.9 | 1904.5 | 1904.5 | 1904.5 |
| gdb 2591 | 1877.1 <sup>a</sup> | 1880.3 | 1874.5 | 1874.6 | 1881.6 | 1879.5 | 1867.2 | 1874.6 | 1874.6 | 1866.2 | 1866.2 | 1866.2 |
| gdb 2592 | 1896.8 <sup>a</sup> | 1905.9 | 1907.2 | 1905.3 | 1904.9 | 1905.2 | 1900.3 | 1903.9 | 1903.9 | 1901.7 | 1901.7 | 1901.7 |
| gdb 2593 | 1897.2 <sup>a</sup> | 1905.8 | 1909.7 | 1907.3 | 1906.8 | 1906.1 | 1898.3 | 1902.5 | 1902.4 | 1900.8 | 1900.7 | 1900.7 |
| gdb 2594 | 1870.6 <sup>a</sup> | 1880.8 | 1872.8 | 1871.2 | 1878.0 | 1875.4 | 1865.4 | 1868.0 | 1868.0 | 1861.3 | 1861.3 | 1861.3 |
| gdb 2595 | 1912.2 <sup>a</sup> | 1914.7 | 1915.9 | 1915.3 | 1917.8 | 1914.7 | 1905.9 | 1911.1 | 1911.1 | 1908.1 | 1908.1 | 1908.1 |
| gdb 2596 | 1897.9 <sup>a</sup> | 1905.4 | 1907.2 | 1904.4 | 1907.8 | 1907.6 | 1897.8 | 1904.2 | 1904.2 | 1902.2 | 1902.2 | 1902.2 |
| gdb 2597 | 1898.5 <sup>a</sup> | 1906.0 | 1907.9 | 1905.5 | 1909.9 | 1908.6 | 1899.0 | 1905.1 | 1905.0 | 1903.0 | 1903.0 | 1903.0 |
| gdb 2598 | 1878.1 <sup>a</sup> | 1887.6 | 1863.7 | 1879.2 | 1883.2 | 1879.2 | 1875.7 | 1881.1 | 1881.1 | 1877.8 | 1877.8 | 1877.8 |
| gdb 2599 | 1881.0 <sup>a</sup> | 1898.0 | 1877.1 | 1889.9 | 1893.3 | 1886.1 | 1883.4 | 1886.6 | 1886.6 | 1888.2 | 1888.2 | 1888.2 |
| gdb 2600 | 1887.1 <sup>a</sup> | 1891.9 | 1867.1 | 1882.2 | 1885.8 | 1878.2 | 1874.8 | 1881.1 | 1881.1 | 1883.4 | 1883.4 | 1883.4 |
| gdb 2601 | 1885.4 <sup>a</sup> | 1890.1 | 1864.7 | 1882.4 | 1885.6 | 1877.6 | 1873.1 | 1878.9 | 1878.9 | 1883.0 | 1883.0 | 1883.0 |
| gdb 2602 | 1883.2 <sup>a</sup> | 1878.0 | 1850.1 | 1871.1 | 1877.1 | 1873.3 | 1866.5 | 1877.4 | 1877.4 | 1874.7 | 1874.7 | 1874.7 |
| gdb 2603 | 1885.6 <sup>a</sup> | 1890.2 | 1864.9 | 1881.8 | 1883.1 | 1875.3 | 1871.7 | 1878.1 | 1878.1 | 1881.9 | 1881.9 | 1881.9 |
| gdb 2604 | 1899.2 <sup>a</sup> | 1892.1 | 1877.9 | 1890.4 | 1892.1 | 1887.2 | 1885.7 | 1894.9 | 1894.9 | 1895.6 | 1895.6 | 1895.6 |
| gdb 2605 | 1892.7 <sup>a</sup> | 1877.9 | 1861.5 | 1878.8 | 1888.9 | 1882.3 | 1874.8 | 1890.0 | 1890.0 | 1887.2 | 1887.2 | 1887.2 |
| gdb 2606 | 1900.5 <sup>a</sup> | 1891.8 | 1877.5 | 1892.1 | 1893.7 | 1888.1 | 1886.0 | 1896.2 | 1896.2 | 1897.1 | 1897.1 | 1897.1 |
| gdb 2607 | 1882.5 <sup>a</sup> | 1906.2 | 1886.2 | 1900.3 | 1900.3 | 1892.0 | 1885.7 | 1889.7 | 1889.7 | 1890.0 | 1890.0 | 1890.0 |
| gdb 2608 | 1884.6 <sup>a</sup> | 1907.7 | 1885.4 | 1900.3 | 1903.2 | 1894.7 | 1887.9 | 1892.4 | 1892.4 | 1893.2 | 1893.2 | 1893.2 |
| gdb 2609 | 1882.0 <sup>a</sup> | 1893.7 | 1869.5 | 1887.2 | 1894.8 | 1886.0 | 1873.6 | 1881.2 | 1881.1 | 1879.8 | 1879.8 | 1879.8 |

... continued on next page ...





Table S26: ... continued from previous page. ...

| Molecule | Ref.                | MNDO   | AMI    | PM3    | PM6    | PM7    | OM1    | OM2    |        | OM3    |        | D3T    |        |
|----------|---------------------|--------|--------|--------|--------|--------|--------|--------|--------|--------|--------|--------|--------|
|          |                     |        |        |        |        |        |        | D2     | D3     | D2     | D3     |        |        |
| gdb 2700 | 1892.0 <sup>a</sup> | 1895.6 | 1892.2 | 1897.1 | 1892.8 | 1892.9 | 1900.4 | 1897.2 | 1897.1 | 1897.2 | 1900.8 | 1900.7 | 1900.7 |
| gdb 2701 | 1897.8 <sup>a</sup> | 1909.9 | 1902.3 | 1912.1 | 1908.2 | 1906.3 | 1904.7 | 1905.3 | 1905.2 | 1905.3 | 1909.5 | 1909.5 | 1909.5 |
| gdb 2702 | 1904.8 <sup>a</sup> | 1913.3 | 1915.1 | 1915.6 | 1911.2 | 1911.5 | 1908.6 | 1911.6 | 1911.6 | 1911.6 | 1913.4 | 1913.4 | 1913.4 |
| gdb 2703 | 1917.8 <sup>a</sup> | 1920.8 | 1924.2 | 1927.0 | 1920.1 | 1922.1 | 1925.2 | 1928.4 | 1928.4 | 1928.4 | 1931.4 | 1931.3 | 1931.3 |
| gdb 2704 | 1865.9 <sup>a</sup> | 1869.6 | 1837.0 | 1857.2 | 1864.0 | 1850.4 | 1843.9 | 1850.5 | 1850.5 | 1850.5 | 1851.7 | 1851.7 | 1851.7 |
| gdb 2705 | 1859.6 <sup>a</sup> | 1856.8 | 1821.7 | 1843.8 | 1859.1 | 1845.0 | 1831.3 | 1840.2 | 1840.2 | 1840.2 | 1840.1 | 1840.1 | 1840.1 |
| gdb 2706 | 1859.7 <sup>a</sup> | 1868.3 | 1834.9 | 1854.7 | 1860.4 | 1847.4 | 1841.2 | 1846.5 | 1846.4 | 1846.4 | 1849.4 | 1849.4 | 1849.4 |
| gdb 2707 | 1861.6 <sup>a</sup> | 1867.1 | 1831.2 | 1852.8 | 1858.0 | 1844.5 | 1840.7 | 1845.9 | 1845.9 | 1845.9 | 1848.4 | 1848.4 | 1848.4 |
| gdb 2708 | 1851.7 <sup>a</sup> | 1852.0 | 1813.2 | 1838.5 | 1850.5 | 1836.7 | 1825.7 | 1833.4 | 1833.4 | 1833.4 | 1834.4 | 1834.4 | 1834.4 |
| gdb 2709 | 1839.3 <sup>a</sup> | 1788.7 | 1788.7 | 1817.6 | 1834.5 | 1813.4 | 1808.4 | 1814.8 | 1814.8 | 1814.8 | 1814.7 | 1814.7 | 1814.7 |
| gdb 2710 | 1849.6 <sup>a</sup> | 1851.6 | 1804.7 | 1829.4 | 1840.0 | 1821.0 | 1819.0 | 1824.3 | 1824.3 | 1824.3 | 1827.0 | 1827.0 | 1827.0 |
| gdb 2711 | 1837.8 <sup>a</sup> | 1839.1 | 1787.1 | 1814.7 | 1829.0 | 1809.6 | 1805.6 | 1813.3 | 1813.3 | 1813.3 | 1812.7 | 1812.7 | 1812.7 |
| gdb 2712 | 1847.7 <sup>a</sup> | 1850.3 | 1800.3 | 1826.7 | 1836.1 | 1816.6 | 1817.6 | 1822.2 | 1822.2 | 1822.2 | 1825.1 | 1825.1 | 1825.1 |
| gdb 2713 | 1838.1 <sup>a</sup> | 1841.8 | 1815.7 | 1832.9 | 1843.2 | 1834.9 | 1825.0 | 1830.0 | 1830.0 | 1830.0 | 1826.9 | 1826.9 | 1826.9 |
| gdb 2714 | 1840.1 <sup>a</sup> | 1854.3 | 1829.6 | 1843.5 | 1851.8 | 1839.4 | 1830.0 | 1831.2 | 1831.2 | 1831.2 | 1835.0 | 1835.0 | 1835.0 |
| gdb 2715 | 1837.1 <sup>a</sup> | 1841.4 | 1814.0 | 1830.0 | 1840.6 | 1832.2 | 1822.8 | 1828.9 | 1828.9 | 1828.9 | 1826.0 | 1826.0 | 1826.0 |
| gdb 2716 | 1838.9 <sup>a</sup> | 1854.7 | 1826.1 | 1841.5 | 1848.7 | 1836.6 | 1830.4 | 1832.2 | 1832.2 | 1832.2 | 1836.6 | 1836.6 | 1836.6 |
| gdb 2717 | 1885.1 <sup>a</sup> | 1890.5 | 1869.5 | 1884.9 | 1889.7 | 1880.6 | 1872.4 | 1877.5 | 1877.5 | 1877.5 | 1881.2 | 1881.2 | 1881.2 |
| gdb 2718 | 1885.9 <sup>a</sup> | 1890.4 | 1865.4 | 1881.7 | 1883.7 | 1875.6 | 1871.0 | 1876.8 | 1876.8 | 1876.8 | 1880.6 | 1880.6 | 1880.6 |
| gdb 2719 | 1895.8 <sup>a</sup> | 1882.2 | 1854.6 | 1875.1 | 1886.7 | 1876.8 | 1864.2 | 1871.9 | 1871.9 | 1871.9 | 1872.6 | 1872.6 | 1872.6 |
| gdb 2720 | 1884.3 <sup>a</sup> | 1890.3 | 1866.1 | 1883.1 | 1886.3 | 1877.7 | 1871.6 | 1877.0 | 1877.0 | 1877.0 | 1881.4 | 1881.4 | 1881.4 |
| gdb 2721 | 1879.1 <sup>a</sup> | 1867.4 | 1832.5 | 1856.0 | 1866.1 | 1853.3 | 1851.2 | 1858.6 | 1858.6 | 1858.6 | 1862.1 | 1862.1 | 1862.1 |
| gdb 2722 | 1877.8 <sup>a</sup> | 1866.0 | 1828.3 | 1852.8 | 1860.7 | 1847.4 | 1848.7 | 1857.4 | 1857.4 | 1857.4 | 1861.2 | 1861.2 | 1861.2 |
| gdb 2723 | 1866.9 <sup>a</sup> | 1849.7 | 1813.8 | 1840.6 | 1858.1 | 1843.6 | 1839.3 | 1854.9 | 1854.9 | 1854.9 | 1853.9 | 1853.8 | 1853.8 |
| gdb 2724 | 1876.8 <sup>a</sup> | 1873.0 | 1855.4 | 1869.1 | 1872.7 | 1865.0 | 1862.0 | 1871.6 | 1871.6 | 1871.6 | 1871.3 | 1871.3 | 1871.3 |
| gdb 2725 | 1875.5 <sup>a</sup> | 1860.9 | 1841.4 | 1858.1 | 1872.3 | 1864.1 | 1855.0 | 1872.6 | 1872.6 | 1872.6 | 1868.4 | 1868.4 | 1868.4 |
| gdb 2726 | 1873.8 <sup>a</sup> | 1871.3 | 1849.3 | 1865.1 | 1867.9 | 1860.1 | 1858.4 | 1869.9 | 1869.9 | 1869.9 | 1869.9 | 1869.9 | 1869.9 |
| gdb 2727 | 1867.9 <sup>a</sup> | 1862.6 | 1833.5 | 1853.5 | 1857.2 | 1846.3 | 1848.5 | 1852.9 | 1852.9 | 1852.9 | 1855.5 | 1855.5 | 1855.5 |
| gdb 2728 | 1858.5 <sup>a</sup> | 1846.1 | 1814.3 | 1837.3 | 1847.7 | 1837.4 | 1836.5 | 1847.3 | 1847.3 | 1847.3 | 1845.7 | 1845.7 | 1845.7 |
| gdb 2729 | 1868.4 <sup>a</sup> | 1861.1 | 1828.6 | 1849.9 | 1851.1 | 1840.1 | 1844.8 | 1850.2 | 1850.2 | 1850.2 | 1853.2 | 1853.1 | 1853.1 |
| gdb 2730 | 1856.1 <sup>a</sup> | 1863.0 | 1832.1 | 1846.5 | 1855.8 | 1848.0 | 1844.2 | 1847.3 | 1847.3 | 1847.3 | 1843.1 | 1843.1 | 1843.1 |
| gdb 2731 | 1857.4 <sup>a</sup> | 1862.2 | 1832.8 | 1848.5 | 1860.5 | 1852.7 | 1847.0 | 1851.6 | 1851.6 | 1851.6 | 1847.6 | 1847.6 | 1847.6 |
| gdb 2732 | 1851.7 <sup>a</sup> | 1848.6 | 1815.9 | 1835.4 | 1845.8 | 1841.3 | 1834.3 | 1841.8 | 1841.8 | 1841.8 | 1832.6 | 1832.6 | 1832.6 |
| gdb 2733 | 1854.8 <sup>a</sup> | 1860.4 | 1829.0 | 1845.2 | 1853.8 | 1845.7 | 1841.7 | 1844.7 | 1844.7 | 1844.7 | 1842.4 | 1842.4 | 1842.4 |
| gdb 2734 | 1857.8 <sup>a</sup> | 1872.4 | 1845.8 | 1857.8 | 1867.6 | 1856.6 | 1851.9 | 1852.3 | 1852.3 | 1852.3 | 1854.8 | 1854.8 | 1854.8 |
| gdb 2735 | 1887.1 <sup>a</sup> | 1896.5 | 1886.1 | 1890.5 | 1892.3 | 1887.0 | 1880.0 | 1882.5 | 1882.5 | 1882.5 | 1885.0 | 1885.0 | 1885.0 |
| gdb 2736 | 1886.0 <sup>a</sup> | 1894.8 | 1883.1 | 1887.9 | 1889.6 | 1884.4 | 1879.8 | 1882.2 | 1882.2 | 1882.2 | 1884.8 | 1884.7 | 1884.7 |
| gdb 2737 | 1886.0 <sup>a</sup> | 1896.4 | 1882.0 | 1888.0 | 1889.7 | 1884.9 | 1879.3 | 1881.9 | 1881.9 | 1881.9 | 1884.9 | 1884.9 | 1884.9 |
| gdb 2738 | 1877.7 <sup>a</sup> | 1889.5 | 1868.6 | 1879.9 | 1880.5 | 1874.7 | 1872.9 | 1873.4 | 1873.4 | 1873.4 | 1876.0 | 1876.0 | 1876.0 |
| gdb 2739 | 1868.6 <sup>a</sup> | 1873.1 | 1850.9 | 1865.9 | 1869.8 | 1863.7 | 1855.4 | 1860.0 | 1860.0 | 1860.0 | 1860.3 | 1860.3 | 1860.3 |
| gdb 2740 | 1872.7 <sup>a</sup> | 1873.9 | 1851.5 | 1866.7 | 1872.6 | 1865.6 | 1856.3 | 1861.3 | 1861.3 | 1861.3 | 1861.7 | 1861.7 | 1861.7 |
| gdb 2741 | 1877.6 <sup>a</sup> | 1888.7 | 1868.0 | 1880.7 | 1879.8 | 1874.1 | 1872.4 | 1873.6 | 1873.6 | 1873.6 | 1876.7 | 1876.7 | 1876.7 |
| gdb 2742 | 1851.3 <sup>a</sup> | 1862.2 | 1829.9 | 1846.0 | 1854.5 | 1849.7 | 1844.8 | 1848.6 | 1848.6 | 1848.6 | 1839.1 | 1839.1 | 1839.1 |
| gdb 2743 | 1855.1 <sup>a</sup> | 1875.0 | 1845.3 | 1857.9 | 1866.7 | 1858.7 | 1855.7 | 1856.8 | 1856.8 | 1856.8 | 1852.1 | 1852.1 | 1852.1 |
| gdb 2744 | 1851.9 <sup>a</sup> | 1871.6 | 1837.3 | 1854.4 | 1866.3 | 1856.2 | 1847.6 | 1847.1 | 1847.1 | 1847.1 | 1848.0 | 1848.0 | 1848.0 |

... continued on next page ...



Table S26: ... continued from previous page. ...

| Molecule | Ref.                | MNDO   | AMI    | PM3    | PM6    | PM7    | OM1    | OM2    |        | OM3    |        | D3T    |
|----------|---------------------|--------|--------|--------|--------|--------|--------|--------|--------|--------|--------|--------|
|          |                     |        |        |        |        |        |        | D2     | D3     | D2     | D3     |        |
| gdb 2745 | 1851.7 <sup>a</sup> | 1854.8 | 1834.3 | 1844.7 | 1856.2 | 1844.9 | 1833.7 | 1854.2 | 1854.2 | 1840.9 | 1840.8 | 1840.9 |
| gdb 2746 | 1848.3 <sup>a</sup> | 1847.0 | 1824.6 | 1837.9 | 1849.6 | 1838.6 | 1826.8 | 1834.5 | 1834.5 | 1832.7 | 1832.6 | 1832.7 |
| gdb 2747 | 1851.9 <sup>a</sup> | 1848.3 | 1830.9 | 1840.8 | 1855.3 | 1843.0 | 1831.6 | 1838.0 | 1838.0 | 1835.8 | 1835.7 | 1835.8 |
| gdb 2748 | 1863.0 <sup>a</sup> | 1870.7 | 1856.7 | 1862.5 | 1871.6 | 1859.8 | 1853.6 | 1855.7 | 1855.6 | 1855.9 | 1855.8 | 1855.9 |
| gdb 2749 | 1859.4 <sup>a</sup> | 1869.3 | 1850.5 | 1859.7 | 1866.5 | 1856.0 | 1849.2 | 1852.2 | 1852.1 | 1852.6 | 1852.6 | 1852.6 |
| gdb 2750 | 1859.8 <sup>a</sup> | 1865.3 | 1846.3 | 1855.7 | 1863.1 | 1852.7 | 1843.8 | 1843.2 | 1843.2 | 1845.0 | 1845.0 | 1845.0 |
| gdb 2751 | 1884.1 <sup>a</sup> | 1886.9 | 1865.8 | 1882.0 | 1884.6 | 1877.1 | 1873.4 | 1877.0 | 1877.1 | 1880.7 | 1880.7 | 1880.7 |
| gdb 2752 | 1882.7 <sup>a</sup> | 1887.6 | 1865.2 | 1880.1 | 1884.3 | 1876.1 | 1873.6 | 1877.4 | 1877.4 | 1881.7 | 1881.7 | 1881.7 |
| gdb 2753 | 1883.5 <sup>a</sup> | 1887.9 | 1868.8 | 1882.8 | 1885.9 | 1877.7 | 1872.5 | 1878.8 | 1878.8 | 1881.3 | 1881.3 | 1881.3 |
| gdb 2754 | 1870.1 <sup>a</sup> | 1847.9 | 1827.2 | 1849.4 | 1860.6 | 1847.3 | 1842.5 | 1852.2 | 1852.2 | 1854.7 | 1854.7 | 1854.7 |
| gdb 2755 | 1871.6 <sup>a</sup> | 1851.8 | 1825.1 | 1848.1 | 1861.1 | 1848.7 | 1845.5 | 1855.0 | 1855.0 | 1858.6 | 1858.6 | 1858.6 |
| gdb 2756 | 1902.7 <sup>a</sup> | 1909.1 | 1900.9 | 1906.1 | 1909.6 | 1904.1 | 1902.0 | 1905.4 | 1905.4 | 1908.6 | 1908.6 | 1908.6 |
| gdb 2757 | 1903.7 <sup>a</sup> | 1909.8 | 1900.0 | 1906.1 | 1909.5 | 1904.6 | 1901.9 | 1905.4 | 1905.4 | 1909.2 | 1909.2 | 1909.2 |
| gdb 2758 | 1894.3 <sup>a</sup> | 1897.3 | 1886.6 | 1895.8 | 1902.2 | 1897.1 | 1889.0 | 1898.0 | 1898.0 | 1898.1 | 1898.1 | 1898.1 |
| gdb 2759 | 1912.7 <sup>a</sup> | 1906.4 | 1898.6 | 1907.3 | 1913.0 | 1905.3 | 1900.3 | 1907.7 | 1907.7 | 1906.0 | 1905.9 | 1905.9 |
| gdb 2760 | 1887.8 <sup>a</sup> | 1901.0 | 1888.2 | 1893.5 | 1895.1 | 1889.9 | 1882.5 | 1884.6 | 1884.6 | 1887.5 | 1887.5 | 1887.5 |
| gdb 2761 | 1884.5 <sup>a</sup> | 1888.6 | 1865.1 | 1879.9 | 1881.3 | 1874.1 | 1873.4 | 1877.1 | 1877.1 | 1880.8 | 1880.8 | 1880.8 |
| gdb 2762 | 1883.6 <sup>a</sup> | 1889.1 | 1867.0 | 1880.7 | 1885.2 | 1876.0 | 1874.5 | 1878.3 | 1878.3 | 1880.7 | 1880.6 | 1880.6 |
| gdb 2763 | 1885.0 <sup>a</sup> | 1889.5 | 1866.9 | 1880.5 | 1885.0 | 1878.0 | 1875.2 | 1878.6 | 1878.6 | 1881.9 | 1881.9 | 1881.9 |
| gdb 2764 | 1875.9 <sup>a</sup> | 1861.1 | 1827.9 | 1850.2 | 1858.4 | 1845.5 | 1847.9 | 1855.2 | 1855.2 | 1859.1 | 1859.1 | 1859.1 |
| gdb 2765 | 1876.4 <sup>a</sup> | 1861.6 | 1831.5 | 1853.0 | 1863.5 | 1851.0 | 1849.4 | 1855.9 | 1855.9 | 1859.4 | 1859.4 | 1859.4 |
| gdb 2766 | 1834.0 <sup>a</sup> | 1828.1 | 1791.1 | 1812.2 | 1827.0 | 1812.8 | 1812.6 | 1815.0 | 1815.0 | 1813.1 | 1813.1 | 1813.1 |
| gdb 2767 | 1844.8 <sup>a</sup> | 1842.8 | 1809.3 | 1826.2 | 1843.9 | 1828.2 | 1827.1 | 1828.9 | 1828.9 | 1831.5 | 1831.5 | 1831.5 |
| gdb 2768 | 1861.6 <sup>a</sup> | 1852.6 | 1830.0 | 1845.6 | 1850.9 | 1842.1 | 1847.8 | 1849.1 | 1849.1 | 1852.7 | 1852.7 | 1852.7 |
| gdb 2769 | 1887.7 <sup>a</sup> | 1894.4 | 1888.5 | 1891.2 | 1895.8 | 1889.1 | 1881.6 | 1884.9 | 1884.9 | 1886.3 | 1886.2 | 1886.2 |
| gdb 2770 | 1886.6 <sup>a</sup> | 1894.6 | 1882.8 | 1886.3 | 1892.9 | 1884.5 | 1881.1 | 1883.0 | 1883.0 | 1884.7 | 1884.7 | 1884.7 |
| gdb 2771 | 1885.1 <sup>a</sup> | 1895.3 | 1883.2 | 1886.8 | 1888.3 | 1883.4 | 1880.6 | 1881.5 | 1881.5 | 1884.1 | 1884.1 | 1884.1 |
| gdb 2772 | 1870.6 <sup>a</sup> | 1870.5 | 1850.2 | 1865.2 | 1870.2 | 1864.7 | 1858.8 | 1862.1 | 1862.1 | 1862.7 | 1862.6 | 1862.6 |
| gdb 2773 | 1877.5 <sup>a</sup> | 1887.0 | 1869.9 | 1879.6 | 1879.5 | 1874.1 | 1874.8 | 1875.1 | 1875.1 | 1877.0 | 1877.0 | 1877.0 |
| gdb 2774 | 1877.8 <sup>a</sup> | 1886.5 | 1869.0 | 1881.5 | 1878.3 | 1873.6 | 1874.8 | 1874.3 | 1874.3 | 1876.9 | 1876.8 | 1876.8 |
| gdb 2775 | 1883.0 <sup>a</sup> | 1881.3 | 1864.1 | 1877.2 | 1883.4 | 1874.7 | 1870.5 | 1876.9 | 1876.9 | 1878.8 | 1878.8 | 1878.8 |
| gdb 2776 | 1883.8 <sup>a</sup> | 1882.2 | 1864.4 | 1879.7 | 1886.7 | 1878.6 | 1871.6 | 1878.4 | 1878.4 | 1881.5 | 1881.5 | 1881.5 |
| gdb 2777 | 1875.3 <sup>a</sup> | 1882.8 | 1871.7 | 1880.1 | 1880.7 | 1875.0 | 1874.9 | 1875.5 | 1875.5 | 1877.8 | 1877.7 | 1877.7 |
| gdb 2778 | 1873.7 <sup>a</sup> | 1885.1 | 1868.1 | 1881.1 | 1880.4 | 1872.9 | 1870.9 | 1870.1 | 1870.1 | 1873.6 | 1873.6 | 1873.6 |
| gdb 2779 | 1874.4 <sup>a</sup> | 1885.6 | 1867.7 | 1879.5 | 1877.9 | 1872.5 | 1871.5 | 1870.9 | 1870.9 | 1874.8 | 1874.8 | 1874.8 |
| gdb 2780 | 1868.4 <sup>a</sup> | 1870.2 | 1849.9 | 1865.6 | 1870.1 | 1864.5 | 1855.9 | 1858.9 | 1858.9 | 1859.8 | 1859.8 | 1859.8 |
| gdb 2781 | 1903.6 <sup>a</sup> | 1908.3 | 1902.9 | 1905.8 | 1911.0 | 1906.0 | 1905.6 | 1908.7 | 1908.7 | 1911.2 | 1911.1 | 1911.1 |
| gdb 2782 | 1915.0 <sup>a</sup> | 1905.4 | 1898.3 | 1905.9 | 1914.1 | 1907.1 | 1905.3 | 1911.2 | 1911.2 | 1909.6 | 1909.6 | 1909.6 |
| gdb 2783 | 1901.3 <sup>a</sup> | 1907.3 | 1901.1 | 1905.2 | 1907.8 | 1903.0 | 1903.3 | 1905.1 | 1905.1 | 1908.5 | 1908.5 | 1908.5 |
| gdb 2784 | 1883.1 <sup>a</sup> | 1879.9 | 1862.7 | 1880.0 | 1885.8 | 1876.8 | 1871.9 | 1878.8 | 1878.7 | 1881.0 | 1881.0 | 1881.0 |
| gdb 2785 | 1885.0 <sup>a</sup> | 1883.0 | 1864.8 | 1880.6 | 1886.0 | 1878.7 | 1875.5 | 1883.1 | 1883.1 | 1884.7 | 1884.7 | 1884.7 |
| gdb 2786 | 1888.9 <sup>a</sup> | 1899.0 | 1890.2 | 1892.0 | 1899.7 | 1892.7 | 1885.3 | 1887.8 | 1887.8 | 1889.6 | 1889.6 | 1889.6 |
| gdb 2787 | 1870.4 <sup>a</sup> | 1882.1 | 1869.6 | 1878.9 | 1873.7 | 1873.7 | 1872.9 | 1870.7 | 1870.7 | 1873.7 | 1873.7 | 1873.7 |
| gdb 2788 | 1875.3 <sup>a</sup> | 1884.4 | 1870.3 | 1878.6 | 1879.7 | 1874.7 | 1875.9 | 1874.3 | 1874.3 | 1876.4 | 1876.4 | 1876.4 |
| gdb 2789 | 1835.9 <sup>a</sup> | 1851.4 | 1832.6 | 1844.1 | 1854.5 | 1841.7 | 1829.7 | 1828.2 | 1828.2 | 1832.3 | 1832.2 | 1832.3 |

... continued on next page ...



Table S26: ... continued from previous page. ...

| Molecule | Ref.                | MNDO   | AMI    | PM3    | PM6    | PM7    | OM1    | OM2    | OM3    |        |        | D3T    |        |
|----------|---------------------|--------|--------|--------|--------|--------|--------|--------|--------|--------|--------|--------|--------|
|          |                     |        |        |        |        |        |        | D2     | D3     | D3T    | D2     | D3     | D3T    |
| gdb 2835 | 1847.6 <sup>a</sup> | 1846.7 | 1807.9 | 1830.3 | 1843.6 | 1824.0 | 1818.2 | 1823.1 | 1823.1 | 1823.1 | 1826.1 | 1826.1 | 1826.1 |
| gdb 2836 | 1848.0 <sup>a</sup> | 1847.3 | 1804.1 | 1826.1 | 1837.8 | 1818.9 | 1820.2 | 1822.1 | 1822.1 | 1822.1 | 1825.5 | 1825.5 | 1825.5 |
| gdb 2837 | 1849.7 <sup>a</sup> | 1848.0 | 1805.0 | 1827.1 | 1839.4 | 1821.0 | 1819.7 | 1823.0 | 1823.0 | 1823.0 | 1826.4 | 1826.4 | 1826.4 |
| gdb 2838 | 1859.6 <sup>a</sup> | 1866.4 | 1840.3 | 1856.3 | 1865.9 | 1852.6 | 1843.0 | 1849.0 | 1849.0 | 1849.0 | 1851.0 | 1851.0 | 1851.0 |
| gdb 2839 | 1858.4 <sup>a</sup> | 1864.6 | 1834.8 | 1852.9 | 1859.4 | 1846.5 | 1839.8 | 1844.4 | 1844.4 | 1844.4 | 1847.3 | 1847.3 | 1847.3 |
| gdb 2840 | 1858.2 <sup>a</sup> | 1865.2 | 1835.1 | 1852.8 | 1858.5 | 1846.1 | 1840.3 | 1844.1 | 1844.1 | 1844.1 | 1847.3 | 1847.3 | 1847.3 |
| gdb 2841 | 1848.0 <sup>a</sup> | 1840.7 | 1802.6 | 1824.8 | 1840.3 | 1822.4 | 1818.2 | 1824.1 | 1824.1 | 1824.1 | 1827.1 | 1827.1 | 1827.1 |
| gdb 2842 | 1876.5 <sup>a</sup> | 1879.9 | 1864.5 | 1872.6 | 1882.4 | 1871.3 | 1863.3 | 1870.7 | 1870.7 | 1870.7 | 1868.5 | 1868.5 | 1868.5 |
| gdb 2843 | 1872.9 <sup>a</sup> | 1877.8 | 1861.5 | 1871.2 | 1882.4 | 1871.3 | 1860.2 | 1868.4 | 1868.4 | 1868.4 | 1867.3 | 1867.3 | 1867.3 |
| gdb 2844 | 1869.7 <sup>a</sup> | 1878.0 | 1859.1 | 1869.2 | 1878.1 | 1867.7 | 1859.6 | 1866.6 | 1866.6 | 1866.6 | 1865.4 | 1865.4 | 1865.4 |
| gdb 2845 | 1877.5 <sup>a</sup> | 1889.7 | 1873.6 | 1881.8 | 1886.5 | 1876.8 | 1871.5 | 1873.8 | 1873.8 | 1873.8 | 1876.2 | 1876.2 | 1876.2 |
| gdb 2846 | 1860.3 <sup>a</sup> | 1867.6 | 1835.1 | 1854.9 | 1862.3 | 1848.5 | 1840.5 | 1846.6 | 1846.6 | 1846.6 | 1849.6 | 1849.6 | 1849.6 |
| gdb 2847 | 1861.9 <sup>a</sup> | 1870.4 | 1837.3 | 1856.4 | 1863.6 | 1849.8 | 1843.2 | 1849.5 | 1849.5 | 1849.5 | 1851.0 | 1851.0 | 1851.0 |
| gdb 2848 | 1862.2 <sup>a</sup> | 1856.6 | 1820.8 | 1843.7 | 1860.5 | 1846.6 | 1832.0 | 1841.6 | 1841.6 | 1841.6 | 1841.8 | 1841.8 | 1841.8 |
| gdb 2849 | 1860.9 <sup>a</sup> | 1867.8 | 1831.1 | 1852.6 | 1857.8 | 1844.3 | 1840.6 | 1845.3 | 1845.3 | 1845.3 | 1848.3 | 1848.3 | 1848.3 |
| gdb 2850 | 1859.6 <sup>a</sup> | 1856.5 | 1833.1 | 1851.4 | 1863.1 | 1850.5 | 1841.0 | 1849.4 | 1849.4 | 1849.4 | 1850.6 | 1850.6 | 1850.6 |
| gdb 2851 | 1861.0 <sup>a</sup> | 1864.1 | 1839.7 | 1855.9 | 1865.6 | 1852.6 | 1844.3 | 1851.1 | 1851.1 | 1851.1 | 1852.6 | 1852.6 | 1852.6 |
| gdb 2852 | 1863.6 <sup>a</sup> | 1865.7 | 1836.6 | 1853.7 | 1861.2 | 1848.8 | 1846.4 | 1850.2 | 1850.2 | 1850.2 | 1852.0 | 1852.0 | 1852.0 |
| gdb 2853 | 1871.3 <sup>a</sup> | 1873.9 | 1860.6 | 1869.9 | 1881.0 | 1870.6 | 1861.0 | 1867.9 | 1867.9 | 1867.9 | 1866.4 | 1866.4 | 1866.4 |
| gdb 2854 | 1878.6 <sup>a</sup> | 1887.0 | 1875.3 | 1880.1 | 1890.7 | 1877.4 | 1874.0 | 1875.5 | 1875.5 | 1875.5 | 1877.0 | 1877.0 | 1877.0 |
| gdb 2855 | 1866.0 <sup>a</sup> | 1856.3 | 1826.4 | 1844.5 | 1858.9 | 1842.4 | 1842.3 | 1848.5 | 1848.5 | 1848.5 | 1848.0 | 1848.0 | 1848.0 |
| gdb 2856 | 1870.3 <sup>a</sup> | 1866.3 | 1843.5 | 1855.5 | 1865.4 | 1851.0 | 1851.5 | 1853.7 | 1853.7 | 1853.7 | 1856.4 | 1856.4 | 1856.4 |
| gdb 2857 | 1870.3 <sup>a</sup> | 1871.5 | 1857.9 | 1866.2 | 1877.0 | 1867.8 | 1856.8 | 1861.2 | 1861.2 | 1861.2 | 1860.6 | 1860.6 | 1860.6 |
| gdb 2858 | 1871.8 <sup>a</sup> | 1870.8 | 1857.5 | 1866.2 | 1878.7 | 1868.9 | 1857.9 | 1862.8 | 1862.8 | 1862.8 | 1862.0 | 1862.0 | 1862.0 |
| gdb 2859 | 1878.7 <sup>a</sup> | 1885.8 | 1874.7 | 1878.8 | 1886.4 | 1877.0 | 1874.8 | 1875.9 | 1875.8 | 1875.8 | 1876.7 | 1876.7 | 1876.7 |
| gdb 2860 | 1856.9 <sup>a</sup> | 1846.1 | 1830.9 | 1845.5 | 1860.5 | 1847.9 | 1838.7 | 1848.7 | 1848.7 | 1848.7 | 1847.0 | 1847.0 | 1847.0 |
| gdb 2861 | 1857.9 <sup>a</sup> | 1848.6 | 1828.9 | 1843.8 | 1858.0 | 1846.4 | 1839.7 | 1849.6 | 1849.6 | 1849.6 | 1848.5 | 1848.5 | 1848.5 |
| gdb 2862 | 1862.9 <sup>a</sup> | 1860.8 | 1845.4 | 1856.8 | 1861.6 | 1851.9 | 1847.8 | 1851.7 | 1851.7 | 1851.7 | 1854.9 | 1854.9 | 1854.9 |
| gdb 2863 | 1864.4 <sup>a</sup> | 1871.8 | 1838.5 | 1857.2 | 1864.3 | 1851.5 | 1846.4 | 1850.6 | 1850.6 | 1850.6 | 1852.6 | 1852.6 | 1852.6 |
| gdb 2864 | 1859.4 <sup>a</sup> | 1858.4 | 1822.3 | 1844.0 | 1859.4 | 1845.4 | 1831.5 | 1840.4 | 1840.4 | 1840.4 | 1840.3 | 1840.3 | 1840.3 |
| gdb 2865 | 1858.4 <sup>a</sup> | 1868.3 | 1835.0 | 1854.6 | 1860.9 | 1847.7 | 1840.2 | 1845.9 | 1845.9 | 1845.9 | 1849.0 | 1849.0 | 1849.0 |
| gdb 2866 | 1859.8 <sup>a</sup> | 1868.9 | 1832.2 | 1853.4 | 1857.0 | 1843.8 | 1841.3 | 1845.8 | 1845.8 | 1845.8 | 1848.5 | 1848.5 | 1848.5 |
| gdb 2867 | 1850.8 <sup>a</sup> | 1853.6 | 1814.6 | 1839.0 | 1850.2 | 1836.1 | 1826.0 | 1835.5 | 1835.5 | 1835.5 | 1835.7 | 1835.7 | 1835.7 |
| gdb 2868 | 1897.6 <sup>a</sup> | 1883.8 | 1875.6 | 1883.5 | 1894.7 | 1887.2 | 1878.0 | 1889.0 | 1889.0 | 1889.0 | 1887.2 | 1887.2 | 1887.2 |
| gdb 2869 | 1891.9 <sup>a</sup> | 1875.2 | 1864.1 | 1875.3 | 1889.2 | 1880.2 | 1867.7 | 1884.4 | 1884.4 | 1884.4 | 1877.7 | 1877.7 | 1877.7 |
| gdb 2870 | 1902.9 <sup>a</sup> | 1896.1 | 1890.1 | 1895.1 | 1898.3 | 1891.7 | 1890.4 | 1895.1 | 1895.1 | 1895.1 | 1895.3 | 1895.3 | 1895.3 |
| gdb 2871 | 1893.6 <sup>a</sup> | 1882.8 | 1876.7 | 1881.9 | 1891.4 | 1884.0 | 1875.5 | 1884.8 | 1884.8 | 1884.8 | 1883.2 | 1883.2 | 1883.2 |
| gdb 2872 | 1900.8 <sup>a</sup> | 1893.2 | 1889.7 | 1892.0 | 1895.4 | 1888.9 | 1888.0 | 1892.8 | 1892.8 | 1892.8 | 1892.8 | 1892.8 | 1892.8 |
| gdb 2873 | 1891.8 <sup>a</sup> | 1884.9 | 1873.1 | 1880.4 | 1889.2 | 1881.3 | 1872.7 | 1882.1 | 1882.1 | 1882.1 | 1880.4 | 1880.4 | 1880.4 |
| gdb 2874 | 1896.8 <sup>a</sup> | 1886.9 | 1876.4 | 1884.2 | 1894.5 | 1887.1 | 1876.3 | 1886.7 | 1886.7 | 1886.7 | 1885.6 | 1885.6 | 1885.6 |
| gdb 2875 | 1889.7 <sup>a</sup> | 1883.3 | 1871.1 | 1880.5 | 1887.0 | 1879.2 | 1871.0 | 1880.1 | 1880.1 | 1880.1 | 1879.8 | 1879.7 | 1879.7 |
| gdb 2876 | 1889.6 <sup>a</sup> | 1878.8 | 1866.1 | 1876.1 | 1888.7 | 1879.0 | 1864.8 | 1881.1 | 1881.1 | 1881.1 | 1874.5 | 1874.5 | 1874.5 |
| gdb 2877 | 1898.9 <sup>a</sup> | 1896.7 | 1888.4 | 1896.4 | 1895.4 | 1888.7 | 1885.8 | 1890.4 | 1890.4 | 1890.4 | 1892.0 | 1892.0 | 1892.0 |
| gdb 2878 | 1890.3 <sup>a</sup> | 1893.0 | 1892.4 | 1890.5 | 1902.7 | 1893.7 | 1881.8 | 1891.2 | 1891.2 | 1891.2 | 1884.0 | 1884.0 | 1884.0 |
| gdb 2879 | 1881.9 <sup>a</sup> | 1886.1 | 1882.5 | 1883.6 | 1892.9 | 1885.7 | 1871.2 | 1879.3 | 1879.3 | 1879.3 | 1875.3 | 1875.3 | 1875.3 |

... continued on next page ...

Table S26: ... continued from previous page. ...

| Molecule | Ref.                | MNDO   | AMI    | PM3    | PM6    | PM7    | OM1    | OM2    |        | OM3    |        | D3T    |
|----------|---------------------|--------|--------|--------|--------|--------|--------|--------|--------|--------|--------|--------|
|          |                     |        |        |        |        |        |        | D2     | D3     | D2     | D3     |        |
| gdb 2880 | 1891.7 <sup>a</sup> | 1897.4 | 1895.3 | 1893.1 | 1899.3 | 1892.0 | 1886.2 | 1888.8 | 1888.8 | 1887.2 | 1887.2 | 1887.2 |
| gdb 2881 | 1895.1 <sup>a</sup> | 1899.4 | 1900.6 | 1896.3 | 1905.8 | 1897.9 | 1890.6 | 1895.4 | 1895.4 | 1893.2 | 1893.2 | 1893.2 |
| gdb 2882 | 1894.6 <sup>a</sup> | 1900.3 | 1898.3 | 1896.0 | 1905.5 | 1898.0 | 1889.2 | 1892.6 | 1892.6 | 1891.8 | 1891.8 | 1891.8 |
| gdb 2883 | 1852.7 <sup>a</sup> | 1851.6 | 1805.5 | 1829.4 | 1842.7 | 1823.8 | 1820.4 | 1826.1 | 1826.1 | 1829.1 | 1829.1 | 1829.1 |
| gdb 2884 | 1850.3 <sup>a</sup> | 1851.9 | 1802.6 | 1830.4 | 1840.8 | 1823.2 | 1820.7 | 1824.5 | 1824.5 | 1827.4 | 1827.4 | 1827.4 |
| gdb 2885 | 1841.9 <sup>a</sup> | 1838.6 | 1787.6 | 1818.2 | 1833.8 | 1815.2 | 1809.0 | 1816.4 | 1816.4 | 1816.7 | 1816.6 | 1816.6 |
| gdb 2886 | 1850.8 <sup>a</sup> | 1850.9 | 1800.6 | 1826.0 | 1836.7 | 1817.2 | 1819.4 | 1824.1 | 1824.1 | 1827.1 | 1827.1 | 1827.1 |
| gdb 2887 | 1842.1 <sup>a</sup> | 1840.5 | 1788.6 | 1816.7 | 1832.6 | 1813.5 | 1809.4 | 1817.5 | 1817.5 | 1817.3 | 1817.3 | 1817.3 |
| gdb 2888 | 1867.7 <sup>a</sup> | 1861.4 | 1840.2 | 1854.2 | 1866.6 | 1854.9 | 1845.7 | 1855.3 | 1855.3 | 1852.5 | 1852.5 | 1852.5 |
| gdb 2889 | 1864.7 <sup>a</sup> | 1859.6 | 1834.8 | 1850.0 | 1861.5 | 1850.8 | 1845.3 | 1853.0 | 1853.0 | 1850.3 | 1850.3 | 1850.3 |
| gdb 2890 | 1869.1 <sup>a</sup> | 1869.8 | 1851.5 | 1866.1 | 1868.8 | 1858.9 | 1854.6 | 1859.9 | 1859.9 | 1860.2 | 1860.2 | 1860.2 |
| gdb 2891 | 1867.4 <sup>a</sup> | 1862.8 | 1836.1 | 1855.9 | 1867.6 | 1853.7 | 1846.1 | 1856.2 | 1856.2 | 1853.3 | 1853.3 | 1853.3 |
| gdb 2892 | 1867.0 <sup>a</sup> | 1861.3 | 1836.6 | 1854.4 | 1869.7 | 1857.3 | 1846.3 | 1859.9 | 1859.9 | 1857.0 | 1857.0 | 1857.0 |
| gdb 2893 | 1868.1 <sup>a</sup> | 1863.8 | 1835.5 | 1854.4 | 1864.7 | 1852.9 | 1846.1 | 1856.4 | 1856.4 | 1853.9 | 1853.9 | 1853.9 |
| gdb 2894 | 1873.9 <sup>a</sup> | 1876.1 | 1851.2 | 1866.7 | 1870.0 | 1859.5 | 1858.1 | 1863.3 | 1863.3 | 1863.8 | 1863.8 | 1863.8 |
| gdb 2895 | 1855.2 <sup>a</sup> | 1849.4 | 1822.6 | 1836.3 | 1851.2 | 1837.0 | 1836.4 | 1841.9 | 1841.9 | 1840.6 | 1840.6 | 1840.6 |
| gdb 2896 | 1870.6 <sup>a</sup> | 1866.3 | 1842.1 | 1852.0 | 1862.4 | 1848.6 | 1851.9 | 1854.5 | 1854.5 | 1856.8 | 1856.8 | 1856.8 |
| gdb 2897 | 1892.5 <sup>a</sup> | 1885.5 | 1880.5 | 1884.6 | 1900.3 | 1890.5 | 1878.8 | 1895.0 | 1895.0 | 1885.4 | 1885.4 | 1885.4 |
| gdb 2898 | 1896.1 <sup>a</sup> | 1894.2 | 1886.6 | 1893.3 | 1900.6 | 1890.6 | 1884.8 | 1890.8 | 1890.8 | 1887.5 | 1887.5 | 1887.5 |
| gdb 2899 | 1894.8 <sup>a</sup> | 1894.0 | 1890.5 | 1893.7 | 1902.4 | 1894.6 | 1884.8 | 1894.2 | 1894.2 | 1890.9 | 1890.9 | 1890.9 |
| gdb 2900 | 1839.6 <sup>a</sup> | 1852.6 | 1828.6 | 1844.2 | 1852.5 | 1839.9 | 1829.6 | 1830.7 | 1830.7 | 1835.2 | 1835.2 | 1835.2 |
| gdb 2901 | 1840.1 <sup>a</sup> | 1854.3 | 1830.6 | 1844.1 | 1852.9 | 1840.6 | 1830.2 | 1831.2 | 1831.2 | 1835.2 | 1835.2 | 1835.2 |
| gdb 2902 | 1843.1 <sup>a</sup> | 1841.7 | 1817.5 | 1834.6 | 1849.7 | 1840.2 | 1823.8 | 1832.2 | 1832.2 | 1828.7 | 1828.7 | 1828.7 |
| gdb 2903 | 1840.6 <sup>a</sup> | 1855.8 | 1827.8 | 1842.8 | 1849.9 | 1838.2 | 1831.6 | 1832.4 | 1832.4 | 1837.4 | 1837.4 | 1837.4 |
| gdb 2904 | 1841.0 <sup>a</sup> | 1843.1 | 1813.9 | 1831.0 | 1843.6 | 1835.1 | 1826.5 | 1832.4 | 1832.4 | 1830.3 | 1830.3 | 1830.3 |
| gdb 2905 | 1878.4 <sup>a</sup> | 1876.7 | 1865.4 | 1869.4 | 1877.9 | 1872.7 | 1870.7 | 1873.9 | 1873.9 | 1869.8 | 1869.8 | 1869.8 |
| gdb 2906 | 1874.7 <sup>a</sup> | 1874.5 | 1861.0 | 1865.9 | 1874.9 | 1868.2 | 1868.2 | 1868.9 | 1868.9 | 1865.9 | 1865.9 | 1865.9 |
| gdb 2907 | 1871.7 <sup>a</sup> | 1885.2 | 1873.1 | 1874.6 | 1883.5 | 1875.1 | 1877.0 | 1874.4 | 1874.4 | 1876.3 | 1876.2 | 1876.2 |
| gdb 2908 | 1863.9 <sup>a</sup> | 1842.7 | 1831.2 | 1843.3 | 1855.5 | 1848.0 | 1842.2 | 1851.6 | 1851.6 | 1847.0 | 1847.0 | 1847.0 |
| gdb 2909 | 1863.9 <sup>a</sup> | 1857.0 | 1848.7 | 1856.3 | 1867.3 | 1858.3 | 1852.7 | 1859.0 | 1859.0 | 1859.3 | 1859.3 | 1859.3 |
| gdb 2910 | 1873.2 <sup>a</sup> | 1874.7 | 1862.2 | 1869.7 | 1875.8 | 1870.5 | 1868.0 | 1870.2 | 1870.2 | 1867.1 | 1867.1 | 1867.1 |
| gdb 2911 | 1864.9 <sup>a</sup> | 1872.9 | 1857.2 | 1867.1 | 1876.6 | 1867.5 | 1860.1 | 1863.8 | 1863.8 | 1864.3 | 1864.3 | 1864.3 |
| gdb 2912 | 1876.3 <sup>a</sup> | 1876.4 | 1860.7 | 1868.7 | 1875.7 | 1870.5 | 1866.6 | 1869.2 | 1869.2 | 1866.7 | 1866.7 | 1866.7 |
| gdb 2913 | 1872.9 <sup>a</sup> | 1887.2 | 1874.3 | 1879.3 | 1885.3 | 1876.5 | 1873.7 | 1872.5 | 1872.5 | 1875.6 | 1875.6 | 1875.6 |
| gdb 2914 | 1870.9 <sup>a</sup> | 1875.3 | 1859.4 | 1868.7 | 1877.6 | 1867.4 | 1859.5 | 1866.7 | 1866.7 | 1864.8 | 1864.8 | 1864.8 |
| gdb 2915 | 1879.4 <sup>a</sup> | 1878.7 | 1863.0 | 1871.9 | 1883.7 | 1873.1 | 1866.9 | 1875.3 | 1875.3 | 1873.0 | 1872.9 | 1872.9 |
| gdb 2916 | 1871.6 <sup>a</sup> | 1876.2 | 1859.3 | 1869.8 | 1877.9 | 1867.0 | 1859.7 | 1867.5 | 1867.5 | 1865.5 | 1865.5 | 1865.5 |
| gdb 2917 | 1882.8 <sup>a</sup> | 1888.8 | 1874.4 | 1882.4 | 1887.8 | 1878.0 | 1876.4 | 1878.9 | 1878.9 | 1879.2 | 1879.2 | 1879.2 |
| gdb 2918 | 1872.7 <sup>a</sup> | 1882.5 | 1862.8 | 1871.0 | 1880.8 | 1869.9 | 1862.9 | 1869.3 | 1869.3 | 1867.4 | 1867.4 | 1867.4 |
| gdb 2919 | 1870.8 <sup>a</sup> | 1880.8 | 1860.7 | 1869.8 | 1878.5 | 1867.9 | 1858.8 | 1864.6 | 1864.6 | 1863.5 | 1863.5 | 1863.5 |
| gdb 2920 | 1870.3 <sup>a</sup> | 1880.5 | 1860.0 | 1869.9 | 1877.2 | 1866.4 | 1860.2 | 1866.7 | 1866.7 | 1865.9 | 1865.9 | 1865.9 |
| gdb 2921 | 1868.7 <sup>a</sup> | 1878.9 | 1857.8 | 1868.6 | 1874.0 | 1863.4 | 1855.3 | 1861.0 | 1861.0 | 1861.4 | 1861.4 | 1861.4 |
| gdb 2922 | 1877.3 <sup>a</sup> | 1892.4 | 1873.8 | 1882.0 | 1885.0 | 1875.4 | 1871.3 | 1872.7 | 1872.7 | 1875.7 | 1875.7 | 1875.7 |
| gdb 2923 | 1865.7 <sup>a</sup> | 1857.6 | 1827.1 | 1843.0 | 1857.1 | 1842.3 | 1839.6 | 1848.2 | 1848.2 | 1847.0 | 1847.0 | 1847.0 |
| gdb 2924 | 1867.3 <sup>a</sup> | 1855.7 | 1825.1 | 1844.8 | 1860.2 | 1844.3 | 1841.4 | 1850.3 | 1850.3 | 1849.2 | 1849.2 | 1849.2 |

... continued on next page ...



Table S26: ... continued from previous page. ...

| Molecule | Ref.                | MNDO   | AMI    | PM3    | PM6    | PM7    | OM1    | OM2    |        | OM3    |        | D3T    |
|----------|---------------------|--------|--------|--------|--------|--------|--------|--------|--------|--------|--------|--------|
|          |                     |        |        |        |        |        |        | D2     | D3     | D2     | D3     |        |
| gdb 2970 | 1876.5 <sup>a</sup> | 1887.4 | 1872.4 | 1881.7 | 1884.5 | 1878.1 | 1875.7 | 1877.9 | 1877.9 | 1879.6 | 1879.6 | 1879.6 |
| gdb 2971 | 1871.1 <sup>a</sup> | 1869.7 | 1850.2 | 1864.2 | 1870.4 | 1863.3 | 1856.8 | 1859.7 | 1859.7 | 1859.9 | 1859.9 | 1859.9 |
| gdb 2972 | 1877.1 <sup>a</sup> | 1885.3 | 1868.3 | 1880.6 | 1878.1 | 1873.3 | 1874.2 | 1873.9 | 1873.9 | 1876.2 | 1876.2 | 1876.2 |
| gdb 2973 | 1894.5 <sup>a</sup> | 1889.0 | 1879.4 | 1890.6 | 1894.7 | 1887.8 | 1882.7 | 1891.3 | 1891.3 | 1893.0 | 1893.0 | 1893.0 |
| gdb 2974 | 1881.4 <sup>a</sup> | 1870.7 | 1857.0 | 1872.1 | 1881.2 | 1873.1 | 1867.0 | 1878.3 | 1878.3 | 1877.3 | 1877.3 | 1877.3 |
| gdb 2975 | 1891.4 <sup>a</sup> | 1887.6 | 1876.5 | 1889.3 | 1892.2 | 1884.6 | 1882.5 | 1887.2 | 1887.2 | 1888.9 | 1888.9 | 1888.9 |
| gdb 2976 | 1877.6 <sup>a</sup> | 1890.5 | 1883.1 | 1881.3 | 1891.0 | 1885.9 | 1877.4 | 1876.2 | 1876.2 | 1875.5 | 1875.5 | 1875.5 |
| gdb 2977 | 1885.3 <sup>a</sup> | 1901.7 | 1896.9 | 1891.6 | 1899.4 | 1893.1 | 1887.2 | 1884.1 | 1884.1 | 1886.3 | 1886.3 | 1886.3 |
| gdb 2978 | 1874.9 <sup>a</sup> | 1883.8 | 1870.7 | 1881.1 | 1887.0 | 1880.6 | 1874.6 | 1875.7 | 1875.7 | 1879.0 | 1879.0 | 1879.0 |
| gdb 2979 | 1870.0 <sup>a</sup> | 1869.0 | 1851.5 | 1865.4 | 1875.6 | 1869.2 | 1859.1 | 1863.8 | 1863.7 | 1864.2 | 1864.2 | 1864.2 |
| gdb 2980 | 1894.8 <sup>a</sup> | 1888.1 | 1879.2 | 1890.2 | 1894.0 | 1887.5 | 1883.0 | 1891.8 | 1891.8 | 1893.3 | 1893.3 | 1893.3 |
| gdb 2981 | 1885.6 <sup>a</sup> | 1875.3 | 1861.6 | 1875.8 | 1883.6 | 1876.2 | 1871.6 | 1883.9 | 1883.9 | 1881.0 | 1881.0 | 1881.0 |
| gdb 2982 | 1862.1 <sup>a</sup> | 1850.3 | 1827.4 | 1842.1 | 1854.7 | 1848.2 | 1842.8 | 1852.8 | 1852.8 | 1844.4 | 1844.4 | 1844.4 |
| gdb 2983 | 1871.9 <sup>a</sup> | 1864.3 | 1846.0 | 1856.9 | 1862.4 | 1857.2 | 1855.8 | 1861.0 | 1861.0 | 1855.9 | 1855.9 | 1855.9 |
| gdb 2984 | 1865.2 <sup>a</sup> | 1861.4 | 1842.9 | 1854.5 | 1870.1 | 1859.2 | 1852.5 | 1861.3 | 1861.3 | 1857.7 | 1857.6 | 1857.6 |
| gdb 2985 | 1883.7 <sup>a</sup> | 1872.6 | 1864.8 | 1875.4 | 1880.6 | 1875.3 | 1873.6 | 1882.0 | 1882.0 | 1879.4 | 1879.4 | 1879.4 |
| gdb 2986 | 1890.8 <sup>a</sup> | 1885.9 | 1879.9 | 1886.5 | 1885.2 | 1882.0 | 1885.3 | 1888.1 | 1888.1 | 1889.2 | 1889.1 | 1889.1 |
| gdb 2987 | 1882.7 <sup>a</sup> | 1887.0 | 1879.6 | 1883.1 | 1894.1 | 1887.8 | 1873.0 | 1882.7 | 1882.7 | 1878.2 | 1878.1 | 1878.1 |
| gdb 2988 | 1910.1 <sup>a</sup> | 1903.3 | 1900.8 | 1908.6 | 1914.5 | 1907.8 | 1900.7 | 1909.8 | 1909.8 | 1905.7 | 1905.7 | 1905.7 |
| gdb 2989 | 1899.6 <sup>a</sup> | 1896.7 | 1890.6 | 1897.0 | 1907.3 | 1902.3 | 1893.0 | 1902.1 | 1902.1 | 1899.4 | 1899.4 | 1899.4 |
| gdb 2990 | 1903.7 <sup>a</sup> | 1908.9 | 1904.9 | 1907.1 | 1909.7 | 1906.5 | 1903.9 | 1908.5 | 1908.4 | 1908.4 | 1908.4 | 1908.4 |
| gdb 2991 | 1841.6 <sup>a</sup> | 1841.9 | 1818.9 | 1830.0 | 1844.1 | 1836.2 | 1828.1 | 1827.9 | 1827.9 | 1822.5 | 1822.5 | 1822.5 |
| gdb 2992 | 1846.0 <sup>a</sup> | 1857.4 | 1838.2 | 1845.3 | 1854.7 | 1847.2 | 1844.4 | 1840.2 | 1840.2 | 1837.8 | 1837.8 | 1837.8 |
| gdb 2993 | 1844.7 <sup>a</sup> | 1853.0 | 1828.9 | 1838.9 | 1852.8 | 1842.1 | 1836.7 | 1832.2 | 1832.2 | 1833.0 | 1833.0 | 1833.0 |
| gdb 2994 | 1873.6 <sup>a</sup> | 1885.2 | 1869.8 | 1880.6 | 1880.4 | 1874.6 | 1871.4 | 1870.5 | 1870.5 | 1873.5 | 1873.5 | 1873.5 |
| gdb 2995 | 1873.9 <sup>a</sup> | 1885.0 | 1867.3 | 1878.6 | 1877.9 | 1872.7 | 1871.7 | 1871.2 | 1871.2 | 1874.8 | 1874.8 | 1874.8 |
| gdb 2996 | 1864.7 <sup>a</sup> | 1870.3 | 1850.4 | 1865.1 | 1868.5 | 1862.6 | 1854.2 | 1856.7 | 1856.7 | 1857.2 | 1857.2 | 1857.2 |
| gdb 2997 | 1884.4 <sup>a</sup> | 1893.7 | 1887.8 | 1891.7 | 1892.8 | 1889.7 | 1889.1 | 1890.9 | 1890.9 | 1890.6 | 1890.6 | 1890.6 |
| gdb 2998 | 1892.7 <sup>a</sup> | 1904.2 | 1900.1 | 1900.9 | 1896.7 | 1894.0 | 1899.5 | 1895.0 | 1895.0 | 1898.7 | 1898.7 | 1898.7 |
| gdb 2999 | 1886.9 <sup>a</sup> | 1884.4 | 1873.9 | 1880.6 | 1888.8 | 1881.6 | 1878.8 | 1877.0 | 1876.9 | 1875.1 | 1875.1 | 1875.1 |
| gdb 3000 | 1864.6 <sup>a</sup> | 1867.9 | 1853.1 | 1864.1 | 1870.3 | 1863.9 | 1858.3 | 1856.8 | 1856.8 | 1858.4 | 1858.4 | 1858.4 |
| gdb 3001 | 1867.9 <sup>a</sup> | 1882.1 | 1871.2 | 1878.7 | 1879.0 | 1873.5 | 1873.0 | 1867.8 | 1867.8 | 1872.2 | 1872.2 | 1872.2 |
| gdb 3002 | 1898.3 <sup>a</sup> | 1891.7 | 1881.3 | 1894.1 | 1896.8 | 1891.2 | 1886.8 | 1895.6 | 1895.6 | 1896.8 | 1896.8 | 1896.8 |
| gdb 3003 | 1893.6 <sup>a</sup> | 1879.5 | 1862.5 | 1879.5 | 1889.6 | 1883.2 | 1876.1 | 1890.9 | 1890.9 | 1888.3 | 1888.3 | 1888.3 |
| gdb 3004 | 1906.0 <sup>a</sup> | 1884.1 | 1869.7 | 1886.1 | 1896.4 | 1887.6 | 1881.3 | 1895.6 | 1895.6 | 1892.9 | 1892.9 | 1892.9 |
| gdb 3005 | 1901.7 <sup>a</sup> | 1892.7 | 1877.5 | 1891.6 | 1891.5 | 1886.6 | 1885.0 | 1894.0 | 1894.0 | 1895.7 | 1895.7 | 1895.7 |
| gdb 3006 | 1877.1 <sup>a</sup> | 1877.9 | 1858.7 | 1871.3 | 1873.9 | 1867.0 | 1864.4 | 1873.3 | 1873.3 | 1873.4 | 1873.4 | 1873.4 |
| gdb 3007 | 1872.8 <sup>a</sup> | 1864.6 | 1845.1 | 1860.0 | 1873.0 | 1864.9 | 1855.1 | 1871.3 | 1871.3 | 1867.5 | 1867.5 | 1867.5 |
| gdb 3008 | 1867.5 <sup>a</sup> | 1847.3 | 1833.3 | 1847.5 | 1859.2 | 1851.6 | 1844.3 | 1855.9 | 1855.9 | 1850.8 | 1850.8 | 1850.8 |
| gdb 3009 | 1863.2 <sup>a</sup> | 1848.7 | 1833.5 | 1847.0 | 1864.3 | 1853.0 | 1844.9 | 1858.4 | 1858.4 | 1854.9 | 1854.9 | 1854.9 |
| gdb 3010 | 1864.0 <sup>a</sup> | 1847.9 | 1829.4 | 1842.9 | 1852.9 | 1846.6 | 1844.1 | 1853.7 | 1853.6 | 1849.2 | 1849.1 | 1849.1 |
| gdb 3011 | 1856.4 <sup>a</sup> | 1837.1 | 1816.0 | 1832.8 | 1846.7 | 1840.5 | 1832.6 | 1847.9 | 1847.9 | 1839.1 | 1839.1 | 1839.1 |
| gdb 3012 | 1866.3 <sup>a</sup> | 1861.7 | 1845.5 | 1857.5 | 1864.5 | 1854.6 | 1853.8 | 1859.4 | 1859.4 | 1860.1 | 1860.1 | 1860.1 |
| gdb 3013 | 1847.6 <sup>a</sup> | 1836.1 | 1797.2 | 1818.2 | 1833.7 | 1821.1 | 1817.1 | 1824.8 | 1824.8 | 1821.9 | 1821.9 | 1821.9 |
| gdb 3014 | 1835.1 <sup>a</sup> | 1831.5 | 1789.6 | 1816.2 | 1833.9 | 1816.9 | 1814.5 | 1822.3 | 1822.2 | 1820.7 | 1820.6 | 1820.6 |

... continued on next page ...

Table S26: ... continued from previous page. ...

| Molecule | Ref.                | MNDO   | AMI    | PM3    | PM6    | PM7    | OM1    | OM2    |        | OM3    |        | D3T    |
|----------|---------------------|--------|--------|--------|--------|--------|--------|--------|--------|--------|--------|--------|
|          |                     |        |        |        |        |        |        | D2     | D3     | D2     | D3     |        |
| gdb 3015 | 1842.7 <sup>a</sup> | 1834.4 | 1790.7 | 1814.9 | 1824.9 | 1812.2 | 1813.7 | 1819.1 | 1819.1 | 1817.1 | 1817.1 | 1817.1 |
| gdb 3016 | 1831.0 <sup>a</sup> | 1818.6 | 1776.7 | 1802.1 | 1821.2 | 1807.9 | 1803.2 | 1814.9 | 1814.9 | 1807.9 | 1807.9 | 1807.8 |
| gdb 3017 | 1846.9 <sup>a</sup> | 1847.0 | 1807.2 | 1828.3 | 1841.3 | 1824.7 | 1826.9 | 1828.3 | 1828.3 | 1831.5 | 1831.5 | 1831.5 |
| gdb 3018 | 1866.5 <sup>a</sup> | 1858.0 | 1831.4 | 1851.3 | 1854.3 | 1844.0 | 1847.9 | 1851.9 | 1851.9 | 1855.2 | 1855.2 | 1855.2 |
| gdb 3019 | 1864.6 <sup>a</sup> | 1855.8 | 1828.7 | 1845.9 | 1851.5 | 1840.9 | 1845.0 | 1848.9 | 1848.9 | 1852.6 | 1852.5 | 1852.5 |
| gdb 3020 | 1855.4 <sup>a</sup> | 1842.6 | 1816.0 | 1836.0 | 1849.2 | 1837.6 | 1836.5 | 1845.8 | 1845.8 | 1845.0 | 1845.0 | 1845.0 |
| gdb 3021 | 1872.5 <sup>a</sup> | 1865.8 | 1845.5 | 1860.3 | 1873.5 | 1865.1 | 1855.2 | 1871.2 | 1871.2 | 1867.6 | 1867.6 | 1867.6 |
| gdb 3022 | 1876.8 <sup>a</sup> | 1878.4 | 1858.6 | 1871.1 | 1874.9 | 1867.4 | 1864.1 | 1873.3 | 1873.2 | 1873.5 | 1873.5 | 1873.5 |
| gdb 3023 | 1889.6 <sup>a</sup> | 1885.8 | 1878.5 | 1883.9 | 1894.4 | 1888.2 | 1874.9 | 1886.3 | 1886.3 | 1881.5 | 1881.5 | 1881.5 |
| gdb 3024 | 1892.0 <sup>a</sup> | 1898.7 | 1894.7 | 1896.2 | 1899.4 | 1894.1 | 1888.8 | 1891.7 | 1891.7 | 1891.0 | 1891.0 | 1891.0 |
| gdb 3025 | 1897.6 <sup>a</sup> | 1891.5 | 1881.5 | 1894.6 | 1898.0 | 1891.6 | 1883.8 | 1895.7 | 1895.7 | 1896.8 | 1896.8 | 1896.8 |
| gdb 3026 | 1910.0 <sup>a</sup> | 1884.4 | 1868.8 | 1885.6 | 1898.5 | 1889.9 | 1884.1 | 1898.5 | 1898.5 | 1896.1 | 1896.1 | 1896.1 |
| gdb 3027 | 1899.3 <sup>a</sup> | 1892.0 | 1877.5 | 1891.9 | 1894.5 | 1888.2 | 1884.8 | 1895.3 | 1895.3 | 1896.8 | 1896.8 | 1896.8 |
| gdb 3028 | 1893.1 <sup>a</sup> | 1877.8 | 1861.8 | 1878.7 | 1890.9 | 1883.1 | 1874.4 | 1890.0 | 1890.0 | 1887.7 | 1887.7 | 1887.7 |
| gdb 3029 | 1886.9 <sup>a</sup> | 1886.9 | 1879.8 | 1884.7 | 1894.7 | 1888.8 | 1875.7 | 1885.4 | 1885.4 | 1881.2 | 1881.2 | 1881.2 |
| gdb 3030 | 1893.4 <sup>a</sup> | 1899.0 | 1895.1 | 1896.1 | 1900.1 | 1894.9 | 1888.9 | 1892.2 | 1892.2 | 1891.4 | 1891.4 | 1891.4 |
| gdb 3031 | 1871.9 <sup>a</sup> | 1861.1 | 1833.4 | 1853.6 | 1863.0 | 1851.7 | 1852.1 | 1858.6 | 1858.6 | 1861.0 | 1861.0 | 1861.0 |
| gdb 3032 | 1859.3 <sup>a</sup> | 1843.6 | 1815.9 | 1836.9 | 1852.2 | 1841.8 | 1838.1 | 1850.5 | 1850.5 | 1848.8 | 1848.7 | 1848.7 |
| gdb 3033 | 1831.0 <sup>a</sup> | 1816.8 | 1802.8 | 1800.6 | 1820.8 | 1808.9 | 1807.0 | 1814.8 | 1814.8 | 1807.4 | 1807.3 | 1807.3 |
| gdb 3034 | 1842.6 <sup>a</sup> | 1832.9 | 1801.1 | 1817.3 | 1831.3 | 1818.7 | 1819.8 | 1821.4 | 1821.4 | 1818.4 | 1818.3 | 1818.3 |
| gdb 3035 | 1840.5 <sup>a</sup> | 1831.8 | 1801.0 | 1816.2 | 1838.3 | 1822.8 | 1819.9 | 1826.0 | 1826.0 | 1823.6 | 1823.6 | 1823.6 |
| gdb 3036 | 1859.7 <sup>a</sup> | 1855.1 | 1829.5 | 1847.3 | 1852.3 | 1841.0 | 1845.3 | 1847.9 | 1847.9 | 1850.7 | 1850.7 | 1850.7 |
| gdb 3037 | 1851.7 <sup>a</sup> | 1840.5 | 1813.9 | 1834.6 | 1843.4 | 1833.2 | 1834.2 | 1842.8 | 1842.7 | 1841.2 | 1841.1 | 1841.2 |
| gdb 3038 | 1882.8 <sup>a</sup> | 1873.7 | 1863.2 | 1873.7 | 1877.8 | 1872.0 | 1869.5 | 1878.3 | 1878.3 | 1876.4 | 1876.4 | 1876.4 |
| gdb 3039 | 1883.1 <sup>a</sup> | 1873.3 | 1861.5 | 1873.0 | 1876.5 | 1871.8 | 1871.1 | 1880.2 | 1880.2 | 1878.1 | 1878.1 | 1878.1 |
| gdb 3040 | 1885.6 <sup>a</sup> | 1875.1 | 1861.3 | 1874.6 | 1878.2 | 1873.7 | 1873.2 | 1882.3 | 1882.3 | 1879.4 | 1879.4 | 1879.4 |
| gdb 3041 | 1895.0 <sup>a</sup> | 1890.3 | 1879.1 | 1887.4 | 1884.1 | 1881.5 | 1886.4 | 1888.9 | 1888.9 | 1889.5 | 1889.5 | 1889.5 |
| gdb 3042 | 1876.6 <sup>a</sup> | 1855.3 | 1830.9 | 1848.7 | 1858.1 | 1846.1 | 1847.0 | 1851.3 | 1851.3 | 1850.3 | 1850.3 | 1850.3 |
| gdb 3043 | 1854.6 <sup>a</sup> | 1842.0 | 1817.6 | 1835.7 | 1849.2 | 1838.0 | 1837.1 | 1844.3 | 1844.3 | 1843.6 | 1843.6 | 1843.6 |
| gdb 3044 | 1864.9 <sup>a</sup> | 1857.9 | 1835.5 | 1851.2 | 1857.4 | 1846.7 | 1849.4 | 1850.4 | 1850.4 | 1854.0 | 1854.0 | 1854.0 |
| gdb 3045 | 1837.4 <sup>a</sup> | 1822.3 | 1797.2 | 1814.6 | 1833.3 | 1818.5 | 1808.0 | 1819.9 | 1819.9 | 1816.1 | 1816.1 | 1816.1 |
| gdb 3046 | 1835.5 <sup>a</sup> | 1823.1 | 1797.3 | 1815.4 | 1834.3 | 1819.9 | 1810.8 | 1822.9 | 1822.8 | 1818.0 | 1818.0 | 1818.0 |
| gdb 3047 | 1848.2 <sup>a</sup> | 1844.6 | 1825.3 | 1838.1 | 1852.8 | 1839.7 | 1831.2 | 1838.3 | 1838.3 | 1836.7 | 1836.7 | 1836.7 |
| gdb 3048 | 1847.8 <sup>a</sup> | 1845.2 | 1822.7 | 1838.5 | 1849.6 | 1834.1 | 1829.3 | 1834.8 | 1834.8 | 1833.4 | 1833.4 | 1833.4 |
| gdb 3049 | 1847.9 <sup>a</sup> | 1845.2 | 1822.6 | 1837.0 | 1847.9 | 1835.1 | 1829.5 | 1834.5 | 1834.5 | 1833.2 | 1833.2 | 1833.2 |
| gdb 3050 | 1851.0 <sup>a</sup> | 1847.4 | 1823.4 | 1837.4 | 1852.4 | 1839.7 | 1831.7 | 1840.9 | 1840.9 | 1838.9 | 1838.9 | 1838.9 |
| gdb 3051 | 1836.9 <sup>a</sup> | 1822.5 | 1796.2 | 1810.5 | 1827.7 | 1811.2 | 1807.8 | 1820.9 | 1820.9 | 1815.6 | 1815.6 | 1815.6 |
| gdb 3052 | 1837.1 <sup>a</sup> | 1826.4 | 1798.6 | 1812.3 | 1831.7 | 1817.6 | 1813.4 | 1824.9 | 1824.9 | 1819.4 | 1819.4 | 1819.4 |
| gdb 3053 | 1827.1 <sup>a</sup> | 1813.4 | 1790.7 | 1804.3 | 1827.5 | 1810.4 | 1803.8 | 1814.6 | 1814.6 | 1810.9 | 1810.9 | 1810.9 |
| gdb 3054 | 1845.5 <sup>a</sup> | 1837.4 | 1814.5 | 1826.8 | 1841.4 | 1826.3 | 1824.3 | 1830.1 | 1830.1 | 1830.0 | 1830.0 | 1830.0 |
| gdb 3055 | 1844.4 <sup>a</sup> | 1837.6 | 1816.8 | 1827.2 | 1843.0 | 1826.5 | 1823.1 | 1829.0 | 1829.0 | 1829.3 | 1829.3 | 1829.3 |
| gdb 3056 | 1845.4 <sup>a</sup> | 1837.0 | 1811.5 | 1825.8 | 1838.7 | 1823.6 | 1823.2 | 1828.5 | 1828.5 | 1828.3 | 1828.3 | 1828.3 |
| gdb 3057 | 1837.3 <sup>a</sup> | 1829.3 | 1803.4 | 1819.4 | 1835.1 | 1819.0 | 1817.8 | 1822.9 | 1822.9 | 1822.1 | 1822.1 | 1822.1 |
| gdb 3058 | 1895.3 <sup>a</sup> | 1889.3 | 1878.3 | 1889.3 | 1891.1 | 1886.7 | 1886.1 | 1893.6 | 1893.6 | 1894.4 | 1894.4 | 1894.4 |
| gdb 3059 | 1894.6 <sup>a</sup> | 1889.6 | 1877.7 | 1888.4 | 1888.6 | 1884.6 | 1884.6 | 1891.5 | 1891.5 | 1892.6 | 1892.6 | 1892.6 |

... continued on next page ...

Table S26: ... continued from previous page. ...

| Molecule | Ref.                | MNDO   | AMI    | PM3    | PM6    | PM7    | OM1    |        | OM2    |        | OM3    |        | D3T    |
|----------|---------------------|--------|--------|--------|--------|--------|--------|--------|--------|--------|--------|--------|--------|
|          |                     |        |        |        |        |        | D2     | D3     | D2     | D3     | D2     | D3     |        |
| gdb 3060 | 1887.3 <sup>a</sup> | 1877.7 | 1862.8 | 1876.8 | 1884.7 | 1879.0 | 1874.2 | 1886.4 | 1886.4 | 1883.5 | 1883.5 | 1883.5 | 1883.5 |
| gdb 3061 | 1892.3 <sup>a</sup> | 1894.3 | 1890.0 | 1895.0 | 1902.0 | 1897.0 | 1887.8 | 1897.1 | 1897.1 | 1894.8 | 1894.8 | 1894.8 | 1894.8 |
| gdb 3062 | 1910.5 <sup>a</sup> | 1903.0 | 1899.6 | 1905.3 | 1911.9 | 1904.3 | 1898.1 | 1905.6 | 1905.6 | 1901.9 | 1901.9 | 1901.9 | 1901.9 |
| gdb 3063 | 1896.7 <sup>a</sup> | 1898.6 | 1889.6 | 1896.1 | 1902.8 | 1898.6 | 1891.1 | 1898.4 | 1898.4 | 1896.1 | 1896.1 | 1896.1 | 1896.1 |
| gdb 3064 | 1901.8 <sup>a</sup> | 1909.6 | 1904.7 | 1907.3 | 1910.4 | 1906.2 | 1903.6 | 1906.8 | 1906.8 | 1907.6 | 1907.6 | 1907.6 | 1907.6 |
| gdb 3065 | 1869.1 <sup>a</sup> | 1869.7 | 1849.4 | 1862.4 | 1873.2 | 1865.4 | 1855.0 | 1869.4 | 1869.4 | 1866.2 | 1866.2 | 1866.2 | 1866.2 |
| gdb 3066 | 1883.9 <sup>a</sup> | 1892.3 | 1884.0 | 1887.2 | 1895.0 | 1889.6 | 1875.7 | 1883.9 | 1883.9 | 1880.5 | 1880.5 | 1880.5 | 1880.5 |
| gdb 3067 | 1880.5 <sup>a</sup> | 1884.7 | 1875.8 | 1882.3 | 1890.2 | 1882.6 | 1874.4 | 1880.2 | 1880.2 | 1875.6 | 1875.6 | 1875.6 | 1875.6 |
| gdb 3068 | 1882.2 <sup>a</sup> | 1885.9 | 1880.1 | 1885.1 | 1892.3 | 1885.0 | 1873.8 | 1881.0 | 1881.0 | 1877.0 | 1877.0 | 1877.0 | 1877.0 |
| gdb 3069 | 1886.5 <sup>a</sup> | 1895.2 | 1890.5 | 1894.1 | 1899.6 | 1893.7 | 1883.0 | 1888.8 | 1888.8 | 1887.7 | 1887.7 | 1887.7 | 1887.7 |
| gdb 3070 | 1883.1 <sup>a</sup> | 1874.8 | 1864.7 | 1875.1 | 1879.6 | 1875.0 | 1874.1 | 1881.9 | 1881.9 | 1879.4 | 1879.4 | 1879.4 | 1879.4 |
| gdb 3071 | 1881.3 <sup>a</sup> | 1869.9 | 1861.9 | 1871.4 | 1877.2 | 1872.2 | 1870.3 | 1879.0 | 1879.0 | 1877.6 | 1877.6 | 1877.6 | 1877.6 |
| gdb 3072 | 1892.8 <sup>a</sup> | 1884.5 | 1881.0 | 1888.2 | 1885.7 | 1882.3 | 1885.3 | 1886.6 | 1886.6 | 1887.9 | 1887.9 | 1887.9 | 1887.9 |
| gdb 3073 | 1857.8 <sup>a</sup> | 1844.3 | 1826.6 | 1838.7 | 1857.7 | 1844.4 | 1838.6 | 1850.6 | 1850.6 | 1846.7 | 1846.7 | 1846.7 | 1846.7 |
| gdb 3074 | 1867.3 <sup>a</sup> | 1848.2 | 1833.7 | 1846.4 | 1858.1 | 1852.5 | 1844.3 | 1855.6 | 1855.6 | 1851.0 | 1851.0 | 1851.0 | 1851.0 |
| gdb 3075 | 1854.8 <sup>a</sup> | 1838.9 | 1816.7 | 1833.1 | 1846.6 | 1840.3 | 1831.3 | 1845.6 | 1845.6 | 1837.2 | 1837.2 | 1837.2 | 1837.2 |
| gdb 3076 | 1857.5 <sup>a</sup> | 1848.2 | 1828.7 | 1843.6 | 1857.8 | 1846.8 | 1840.5 | 1851.2 | 1851.2 | 1849.5 | 1849.5 | 1849.5 | 1849.5 |
| gdb 3077 | 1864.9 <sup>a</sup> | 1860.3 | 1843.3 | 1854.5 | 1862.6 | 1853.0 | 1850.7 | 1855.7 | 1855.7 | 1858.0 | 1858.0 | 1858.0 | 1858.0 |
| gdb 3078 | 1861.8 <sup>a</sup> | 1850.2 | 1827.4 | 1842.0 | 1855.5 | 1848.0 | 1842.0 | 1852.0 | 1852.0 | 1843.9 | 1843.9 | 1843.9 | 1843.9 |
| gdb 3079 | 1867.7 <sup>a</sup> | 1860.8 | 1842.2 | 1854.5 | 1869.3 | 1859.7 | 1850.6 | 1857.6 | 1857.6 | 1857.0 | 1857.0 | 1857.0 | 1857.0 |
| gdb 3080 | 1872.3 <sup>a</sup> | 1863.4 | 1846.3 | 1857.7 | 1864.6 | 1858.8 | 1856.2 | 1860.8 | 1860.8 | 1856.0 | 1856.0 | 1856.0 | 1856.0 |
| gdb 3081 | 1868.1 <sup>a</sup> | 1862.6 | 1844.6 | 1855.8 | 1870.7 | 1859.5 | 1852.9 | 1861.6 | 1861.6 | 1857.9 | 1857.9 | 1857.9 | 1857.9 |
| gdb 3082 | 1870.5 <sup>a</sup> | 1868.0 | 1853.4 | 1860.1 | 1870.8 | 1866.1 | 1858.2 | 1863.9 | 1863.9 | 1855.9 | 1855.9 | 1855.9 | 1855.9 |
| gdb 3083 | 1864.3 <sup>a</sup> | 1872.3 | 1866.5 | 1871.6 | 1883.5 | 1873.5 | 1860.2 | 1866.3 | 1866.3 | 1864.4 | 1864.4 | 1864.4 | 1864.4 |
| gdb 3084 | 1878.7 <sup>a</sup> | 1876.3 | 1869.2 | 1871.8 | 1881.1 | 1875.7 | 1870.1 | 1874.0 | 1874.0 | 1868.6 | 1868.6 | 1868.6 | 1868.6 |
| gdb 3085 | 1873.4 <sup>a</sup> | 1878.8 | 1868.6 | 1872.9 | 1885.5 | 1875.8 | 1866.8 | 1870.9 | 1870.9 | 1868.4 | 1868.4 | 1868.4 | 1868.4 |
| gdb 3086 | 1851.4 <sup>a</sup> | 1835.0 | 1824.3 | 1833.6 | 1858.0 | 1847.6 | 1835.6 | 1849.6 | 1849.6 | 1842.1 | 1842.1 | 1842.1 | 1842.1 |
| gdb 3087 | 1858.2 <sup>a</sup> | 1841.6 | 1834.3 | 1846.7 | 1864.7 | 1851.3 | 1841.1 | 1853.2 | 1853.2 | 1849.1 | 1849.1 | 1849.1 | 1849.1 |
| gdb 3088 | 1855.7 <sup>a</sup> | 1845.1 | 1838.4 | 1846.8 | 1862.8 | 1852.1 | 1842.0 | 1853.6 | 1853.6 | 1849.4 | 1849.4 | 1849.4 | 1849.4 |
| gdb 3089 | 1861.0 <sup>a</sup> | 1855.7 | 1835.8 | 1848.7 | 1864.8 | 1852.8 | 1841.2 | 1850.4 | 1850.4 | 1843.7 | 1843.7 | 1843.7 | 1843.7 |
| gdb 3090 | 1871.5 <sup>a</sup> | 1867.0 | 1851.1 | 1860.1 | 1872.5 | 1861.9 | 1852.6 | 1856.8 | 1856.8 | 1853.8 | 1853.8 | 1853.8 | 1853.8 |
| gdb 3091 | 1868.6 <sup>a</sup> | 1874.8 | 1856.8 | 1866.5 | 1877.1 | 1867.3 | 1858.4 | 1864.7 | 1864.7 | 1861.1 | 1861.1 | 1861.1 | 1861.1 |
| gdb 3092 | 1860.9 <sup>a</sup> | 1846.6 | 1825.6 | 1842.1 | 1848.6 | 1839.8 | 1844.3 | 1849.0 | 1849.0 | 1851.4 | 1851.4 | 1851.4 | 1851.4 |
| gdb 3093 | 1861.8 <sup>a</sup> | 1847.7 | 1824.9 | 1840.9 | 1846.8 | 1838.7 | 1842.7 | 1848.1 | 1848.1 | 1849.8 | 1849.8 | 1849.8 | 1849.8 |
| gdb 3094 | 1849.6 <sup>a</sup> | 1835.4 | 1814.0 | 1832.2 | 1843.3 | 1833.4 | 1833.8 | 1843.7 | 1843.7 | 1841.5 | 1841.5 | 1841.5 | 1841.5 |
| gdb 3095 | 1828.8 <sup>a</sup> | 1828.6 | 1788.1 | 1810.9 | 1830.3 | 1813.0 | 1804.2 | 1811.7 | 1811.7 | 1806.4 | 1806.4 | 1806.4 | 1806.4 |
| gdb 3096 | 1825.6 <sup>a</sup> | 1828.5 | 1790.3 | 1810.8 | 1831.8 | 1812.4 | 1803.8 | 1810.2 | 1810.2 | 1805.5 | 1805.5 | 1805.5 | 1805.5 |
| gdb 3097 | 1847.3 <sup>a</sup> | 1845.5 | 1804.6 | 1827.3 | 1841.4 | 1825.7 | 1822.6 | 1824.4 | 1824.4 | 1824.0 | 1824.0 | 1824.0 | 1824.0 |
| gdb 3098 | 1841.5 <sup>a</sup> | 1845.8 | 1806.1 | 1826.9 | 1839.4 | 1822.5 | 1819.6 | 1820.8 | 1820.8 | 1820.4 | 1820.4 | 1820.4 | 1820.4 |
| gdb 3099 | 1834.4 <sup>a</sup> | 1842.9 | 1804.8 | 1826.4 | 1841.1 | 1824.2 | 1821.2 | 1824.4 | 1824.4 | 1821.8 | 1821.8 | 1821.8 | 1821.8 |
| gdb 3100 | 1868.1 <sup>a</sup> | 1856.1 | 1832.4 | 1848.8 | 1860.8 | 1851.7 | 1852.5 | 1857.6 | 1857.6 | 1858.6 | 1858.6 | 1858.6 | 1858.6 |
| gdb 3101 | 1853.6 <sup>a</sup> | 1840.1 | 1816.5 | 1836.5 | 1853.6 | 1841.1 | 1836.3 | 1847.2 | 1847.2 | 1846.2 | 1846.2 | 1846.2 | 1846.2 |
| gdb 3102 | 1826.3 <sup>a</sup> | 1812.7 | 1784.7 | 1800.5 | 1820.9 | 1807.8 | 1806.1 | 1811.5 | 1811.5 | 1804.8 | 1804.8 | 1804.8 | 1804.8 |
| gdb 3103 | 1838.0 <sup>a</sup> | 1827.3 | 1798.9 | 1809.2 | 1826.9 | 1815.6 | 1819.2 | 1818.9 | 1818.9 | 1816.3 | 1816.3 | 1816.3 | 1816.3 |
| gdb 3104 | 1829.7 <sup>a</sup> | 1823.1 | 1797.6 | 1810.4 | 1833.0 | 1816.3 | 1815.2 | 1818.9 | 1818.9 | 1816.1 | 1816.1 | 1816.1 | 1816.1 |

... continued on next page ...









Table S26: ... continued from previous page. ...

| Molecule | Ref.                | MNDO   | AMI    | PM3    | PM6    | PM7    | OM1    | OM2    |        | OM3    |        | D3T    |
|----------|---------------------|--------|--------|--------|--------|--------|--------|--------|--------|--------|--------|--------|
|          |                     |        |        |        |        |        |        | D2     | D3     | D2     | D3     |        |
| gdb 3240 | 1875.4 <sup>a</sup> | 1874.8 | 1850.5 | 1867.0 | 1871.5 | 1860.5 | 1858.8 | 1864.3 | 1864.3 | 1863.9 | 1864.5 | 1863.8 |
| gdb 3241 | 1878.2 <sup>a</sup> | 1870.5 | 1858.8 | 1866.4 | 1881.0 | 1871.2 | 1861.9 | 1874.7 | 1874.7 | 1868.2 | 1868.2 | 1868.2 |
| gdb 3242 | 1880.0 <sup>a</sup> | 1870.9 | 1858.8 | 1866.7 | 1879.4 | 1869.8 | 1861.1 | 1874.4 | 1874.4 | 1867.6 | 1867.6 | 1867.6 |
| gdb 3243 | 1888.0 <sup>a</sup> | 1882.5 | 1874.9 | 1879.1 | 1887.8 | 1878.9 | 1873.9 | 1882.2 | 1882.2 | 1879.0 | 1879.0 | 1879.0 |
| gdb 3244 | 1885.4 <sup>a</sup> | 1880.7 | 1870.3 | 1875.3 | 1881.7 | 1873.9 | 1870.7 | 1878.3 | 1878.3 | 1874.9 | 1874.8 | 1874.9 |
| gdb 3245 | 1888.1 <sup>a</sup> | 1883.6 | 1874.5 | 1879.6 | 1889.6 | 1880.5 | 1874.6 | 1882.7 | 1882.7 | 1879.4 | 1879.4 | 1879.4 |
| gdb 3246 | 1869.7 <sup>a</sup> | 1877.6 | 1866.5 | 1872.1 | 1884.7 | 1873.7 | 1864.8 | 1866.0 | 1866.0 | 1865.0 | 1865.0 | 1865.0 |
| gdb 3247 | 1864.7 <sup>a</sup> | 1875.0 | 1864.8 | 1870.4 | 1880.6 | 1870.6 | 1861.0 | 1863.7 | 1863.7 | 1863.2 | 1863.2 | 1863.2 |
| gdb 3248 | 1864.2 <sup>a</sup> | 1879.2 | 1853.6 | 1870.5 | 1879.9 | 1867.0 | 1850.0 | 1857.8 | 1857.8 | 1854.2 | 1854.2 | 1854.2 |
| gdb 3249 | 1866.7 <sup>a</sup> | 1880.0 | 1852.8 | 1870.6 | 1881.1 | 1868.8 | 1852.3 | 1860.0 | 1860.0 | 1856.6 | 1856.6 | 1856.6 |
| gdb 3250 | 1862.8 <sup>a</sup> | 1878.4 | 1850.4 | 1869.0 | 1877.9 | 1865.2 | 1850.7 | 1858.1 | 1858.1 | 1854.5 | 1854.5 | 1854.5 |
| gdb 3251 | 1868.7 <sup>a</sup> | 1893.6 | 1868.0 | 1883.3 | 1886.4 | 1874.6 | 1862.6 | 1867.9 | 1867.9 | 1866.4 | 1866.4 | 1866.4 |
| gdb 3252 | 1859.3 <sup>a</sup> | 1881.9 | 1853.4 | 1870.4 | 1879.6 | 1866.8 | 1849.4 | 1857.0 | 1857.0 | 1853.7 | 1853.7 | 1853.7 |
| gdb 3253 | 1860.2 <sup>a</sup> | 1882.0 | 1850.4 | 1868.6 | 1875.1 | 1862.5 | 1850.7 | 1857.9 | 1857.9 | 1854.1 | 1854.1 | 1854.1 |
| gdb 3254 | 1864.4 <sup>a</sup> | 1896.4 | 1868.6 | 1883.7 | 1886.7 | 1874.8 | 1863.6 | 1867.1 | 1867.1 | 1866.4 | 1866.3 | 1866.3 |
| gdb 3255 | 1894.3 <sup>a</sup> | 1891.0 | 1884.9 | 1890.5 | 1900.8 | 1890.8 | 1880.5 | 1896.8 | 1896.8 | 1887.1 | 1887.1 | 1887.1 |
| gdb 3256 | 1892.6 <sup>a</sup> | 1886.0 | 1881.6 | 1885.9 | 1901.2 | 1891.4 | 1879.4 | 1896.0 | 1896.0 | 1886.5 | 1886.5 | 1886.5 |
| gdb 3257 | 1898.7 <sup>a</sup> | 1898.5 | 1890.7 | 1897.0 | 1902.0 | 1894.6 | 1890.1 | 1898.3 | 1898.3 | 1894.2 | 1894.2 | 1894.2 |
| gdb 3258 | 1894.0 <sup>a</sup> | 1893.5 | 1886.0 | 1894.3 | 1895.5 | 1888.5 | 1883.8 | 1892.0 | 1892.0 | 1888.2 | 1888.2 | 1888.2 |
| gdb 3259 | 1894.6 <sup>a</sup> | 1891.3 | 1886.1 | 1891.0 | 1902.0 | 1892.4 | 1882.0 | 1898.5 | 1898.5 | 1888.4 | 1888.4 | 1888.4 |
| gdb 3260 | 1893.7 <sup>a</sup> | 1886.5 | 1877.4 | 1884.2 | 1896.9 | 1889.0 | 1877.2 | 1890.5 | 1890.5 | 1883.6 | 1883.6 | 1883.6 |
| gdb 3261 | 1898.9 <sup>a</sup> | 1899.5 | 1894.3 | 1897.9 | 1905.7 | 1898.4 | 1889.7 | 1899.3 | 1899.3 | 1895.5 | 1895.4 | 1895.4 |
| gdb 3262 | 1894.4 <sup>a</sup> | 1892.6 | 1889.5 | 1893.7 | 1902.0 | 1894.1 | 1884.6 | 1894.6 | 1894.6 | 1890.9 | 1890.9 | 1890.9 |
| gdb 3263 | 1898.3 <sup>a</sup> | 1894.9 | 1890.5 | 1893.9 | 1900.9 | 1893.5 | 1884.7 | 1892.8 | 1892.8 | 1889.1 | 1889.1 | 1889.1 |
| gdb 3264 | 1870.6 <sup>a</sup> | 1864.1 | 1840.3 | 1856.0 | 1871.5 | 1858.1 | 1847.3 | 1860.1 | 1860.1 | 1857.4 | 1857.4 | 1857.4 |
| gdb 3265 | 1870.0 <sup>a</sup> | 1863.3 | 1835.5 | 1856.7 | 1867.1 | 1855.8 | 1847.7 | 1858.4 | 1858.4 | 1855.8 | 1855.8 | 1855.8 |
| gdb 3266 | 1866.7 <sup>a</sup> | 1862.8 | 1833.8 | 1851.9 | 1865.0 | 1852.4 | 1846.1 | 1857.7 | 1857.7 | 1855.0 | 1855.0 | 1855.0 |
| gdb 3267 | 1874.8 <sup>a</sup> | 1875.7 | 1851.1 | 1865.7 | 1871.2 | 1861.2 | 1858.7 | 1864.4 | 1864.4 | 1864.8 | 1864.8 | 1864.8 |
| gdb 3268 | 1868.1 <sup>a</sup> | 1863.6 | 1835.9 | 1853.1 | 1864.9 | 1853.7 | 1846.7 | 1856.7 | 1856.7 | 1853.8 | 1853.8 | 1853.8 |
| gdb 3269 | 1865.7 <sup>a</sup> | 1861.9 | 1834.9 | 1851.5 | 1865.7 | 1853.6 | 1845.8 | 1857.3 | 1857.3 | 1854.6 | 1854.6 | 1854.6 |
| gdb 3270 | 1868.4 <sup>a</sup> | 1865.4 | 1836.8 | 1855.0 | 1864.1 | 1852.7 | 1847.1 | 1857.4 | 1857.4 | 1854.7 | 1854.7 | 1854.7 |
| gdb 3271 | 1866.2 <sup>a</sup> | 1862.5 | 1834.8 | 1853.1 | 1865.5 | 1853.1 | 1846.1 | 1858.3 | 1858.3 | 1855.2 | 1855.2 | 1855.2 |
| gdb 3272 | 1873.2 <sup>a</sup> | 1874.9 | 1851.9 | 1866.9 | 1870.1 | 1860.0 | 1858.1 | 1862.6 | 1862.6 | 1863.2 | 1863.2 | 1863.2 |
| gdb 3273 | 1886.7 <sup>a</sup> | 1868.4 | 1868.8 | 1876.9 | 1886.8 | 1877.7 | 1869.1 | 1891.3 | 1891.3 | 1879.8 | 1879.8 | 1879.8 |
| gdb 3274 | 1886.7 <sup>a</sup> | 1863.5 | 1859.4 | 1866.3 | 1884.4 | 1877.7 | 1868.0 | 1887.7 | 1887.7 | 1879.6 | 1879.6 | 1879.6 |
| gdb 3275 | 1889.5 <sup>a</sup> | 1870.6 | 1870.2 | 1873.7 | 1884.6 | 1878.7 | 1873.8 | 1886.9 | 1886.9 | 1882.4 | 1882.4 | 1882.4 |
| gdb 3276 | 1889.8 <sup>a</sup> | 1870.0 | 1870.3 | 1877.7 | 1885.4 | 1879.7 | 1874.5 | 1888.2 | 1888.2 | 1883.7 | 1883.6 | 1883.6 |
| gdb 3277 | 1862.9 <sup>a</sup> | 1872.9 | 1858.7 | 1866.6 | 1876.1 | 1866.2 | 1857.7 | 1862.0 | 1862.0 | 1862.3 | 1862.3 | 1862.3 |
| gdb 3278 | 1862.9 <sup>a</sup> | 1878.1 | 1863.1 | 1870.8 | 1879.2 | 1873.5 | 1868.5 | 1870.8 | 1870.8 | 1868.3 | 1868.3 | 1868.3 |
| gdb 3279 | 1862.9 <sup>a</sup> | 1873.5 | 1857.4 | 1866.7 | 1875.9 | 1866.4 | 1858.2 | 1862.6 | 1862.6 | 1863.1 | 1863.1 | 1863.1 |
| gdb 3280 | 1870.0 <sup>a</sup> | 1886.3 | 1874.6 | 1879.4 | 1885.9 | 1876.5 | 1873.6 | 1872.0 | 1872.0 | 1875.8 | 1875.8 | 1875.8 |
| gdb 3281 | 1873.6 <sup>a</sup> | 1874.7 | 1861.8 | 1866.8 | 1875.4 | 1870.2 | 1867.9 | 1870.1 | 1870.1 | 1866.9 | 1866.9 | 1866.9 |
| gdb 3282 | 1862.6 <sup>a</sup> | 1871.8 | 1857.9 | 1867.6 | 1875.4 | 1865.7 | 1862.0 | 1862.0 | 1862.0 | 1862.1 | 1862.1 | 1862.1 |
| gdb 3283 | 1877.6 <sup>a</sup> | 1878.3 | 1860.7 | 1868.0 | 1874.1 | 1869.5 | 1867.4 | 1869.3 | 1869.3 | 1866.9 | 1866.9 | 1866.9 |
| gdb 3284 | 1862.4 <sup>a</sup> | 1872.8 | 1857.0 | 1866.0 | 1875.2 | 1866.1 | 1858.5 | 1863.0 | 1863.0 | 1863.2 | 1863.2 | 1863.2 |

... continued on next page ...

Table S26: ... continued from previous page. ...

| Molecule | Ref.                | MNDO   | AMI    | PM3    | PM6    | PM7    | OM1    |        | OM2    |        | OM3    |        | D3T    |
|----------|---------------------|--------|--------|--------|--------|--------|--------|--------|--------|--------|--------|--------|--------|
|          |                     |        |        |        |        |        | OM1    | OM2    | OM3    | D2     | D3     | D3T    |        |
| gdb 3285 | 1871.6 <sup>a</sup> | 1887.0 | 1875.3 | 1879.3 | 1884.9 | 1876.2 | 1873.6 | 1870.9 | 1870.9 | 1870.9 | 1875.6 | 1875.6 | 1875.6 |
| gdb 3286 | 1855.2 <sup>a</sup> | 1871.2 | 1854.2 | 1862.7 | 1872.5 | 1863.6 | 1854.9 | 1854.8 | 1854.8 | 1854.8 | 1853.0 | 1853.0 | 1853.0 |
| gdb 3287 | 1864.4 <sup>a</sup> | 1884.2 | 1868.6 | 1872.0 | 1881.3 | 1871.6 | 1869.1 | 1863.6 | 1863.6 | 1863.6 | 1865.3 | 1865.3 | 1865.3 |
| gdb 3288 | 1872.4 <sup>a</sup> | 1886.0 | 1873.3 | 1873.0 | 1882.3 | 1875.8 | 1874.2 | 1867.2 | 1867.2 | 1867.2 | 1866.1 | 1866.1 | 1866.1 |
| gdb 3289 | 1871.8 <sup>a</sup> | 1890.1 | 1871.9 | 1881.6 | 1891.6 | 1880.7 | 1866.3 | 1872.9 | 1872.9 | 1872.9 | 1867.1 | 1867.1 | 1867.1 |
| gdb 3290 | 1874.6 <sup>a</sup> | 1905.3 | 1888.3 | 1894.1 | 1899.3 | 1888.9 | 1880.9 | 1883.5 | 1883.5 | 1883.5 | 1880.0 | 1880.0 | 1880.0 |
| gdb 3291 | 1874.5 <sup>a</sup> | 1904.7 | 1888.0 | 1893.9 | 1899.8 | 1889.3 | 1880.9 | 1883.7 | 1883.7 | 1883.7 | 1880.3 | 1880.3 | 1880.3 |
| gdb 3292 | 1876.4 <sup>a</sup> | 1901.2 | 1884.6 | 1892.1 | 1898.0 | 1887.5 | 1876.2 | 1878.0 | 1878.0 | 1878.0 | 1875.6 | 1875.6 | 1875.6 |
| gdb 3293 | 1878.0 <sup>a</sup> | 1870.9 | 1858.7 | 1866.7 | 1879.8 | 1870.2 | 1859.7 | 1873.6 | 1873.6 | 1873.6 | 1867.4 | 1867.4 | 1867.4 |
| gdb 3294 | 1883.6 <sup>a</sup> | 1875.9 | 1866.5 | 1872.7 | 1886.5 | 1875.1 | 1866.0 | 1881.0 | 1881.0 | 1881.0 | 1872.4 | 1872.4 | 1872.4 |
| gdb 3295 | 1886.4 <sup>a</sup> | 1882.8 | 1872.6 | 1878.0 | 1884.4 | 1876.5 | 1873.2 | 1880.4 | 1880.4 | 1880.4 | 1877.5 | 1877.5 | 1877.5 |
| gdb 3296 | 1885.6 <sup>a</sup> | 1882.7 | 1873.3 | 1880.5 | 1886.2 | 1877.7 | 1873.8 | 1881.6 | 1881.6 | 1881.6 | 1878.8 | 1878.8 | 1878.8 |
| gdb 3297 | 1890.6 <sup>a</sup> | 1883.4 | 1874.1 | 1879.1 | 1889.7 | 1880.7 | 1874.8 | 1883.1 | 1883.1 | 1883.1 | 1880.5 | 1880.5 | 1880.5 |
| gdb 3298 | 1866.3 <sup>a</sup> | 1882.6 | 1863.4 | 1871.3 | 1881.6 | 1871.5 | 1860.2 | 1863.7 | 1863.7 | 1863.7 | 1859.6 | 1859.6 | 1859.6 |
| gdb 3299 | 1870.5 <sup>a</sup> | 1893.9 | 1877.8 | 1882.5 | 1889.5 | 1878.7 | 1872.9 | 1869.7 | 1869.7 | 1869.7 | 1869.4 | 1869.4 | 1869.4 |
| gdb 3300 | 1871.2 <sup>a</sup> | 1894.0 | 1878.4 | 1882.8 | 1890.3 | 1879.7 | 1873.5 | 1870.2 | 1870.2 | 1870.2 | 1870.1 | 1870.1 | 1870.1 |
| gdb 3301 | 1869.2 <sup>a</sup> | 1895.1 | 1877.1 | 1882.6 | 1889.3 | 1880.2 | 1874.1 | 1872.9 | 1872.8 | 1872.8 | 1872.4 | 1872.4 | 1872.4 |
| gdb 3302 | 1888.0 <sup>a</sup> | 1900.5 | 1888.4 | 1892.9 | 1892.8 | 1888.1 | 1882.2 | 1883.9 | 1883.9 | 1883.9 | 1886.8 | 1886.8 | 1886.8 |
| gdb 3303 | 1885.9 <sup>a</sup> | 1902.7 | 1898.0 | 1892.4 | 1899.6 | 1893.2 | 1888.3 | 1885.0 | 1884.9 | 1884.9 | 1887.5 | 1887.4 | 1887.4 |
| gdb 3304 | 1890.7 <sup>a</sup> | 1896.3 | 1894.5 | 1893.2 | 1898.1 | 1893.2 | 1886.7 | 1890.4 | 1890.4 | 1890.4 | 1889.2 | 1889.2 | 1889.2 |
| gdb 3305 | 1888.1 <sup>a</sup> | 1904.9 | 1897.2 | 1893.6 | 1899.2 | 1893.6 | 1887.7 | 1884.1 | 1884.1 | 1884.1 | 1887.7 | 1887.7 | 1887.7 |
| gdb 3306 | 1903.2 <sup>a</sup> | 1910.7 | 1899.6 | 1904.8 | 1907.0 | 1903.3 | 1903.3 | 1905.1 | 1905.1 | 1905.1 | 1908.2 | 1908.2 | 1908.2 |
| gdb 3307 | 1903.6 <sup>a</sup> | 1911.1 | 1899.3 | 1905.7 | 1905.2 | 1902.0 | 1902.1 | 1903.8 | 1903.7 | 1903.7 | 1907.8 | 1907.8 | 1907.8 |
| gdb 3308 | 1913.2 <sup>a</sup> | 1906.2 | 1897.4 | 1895.2 | 1912.1 | 1904.7 | 1900.1 | 1907.4 | 1907.4 | 1907.4 | 1905.3 | 1905.3 | 1905.3 |
| gdb 3309 | 1891.6 <sup>a</sup> | 1897.1 | 1886.4 | 1894.2 | 1898.8 | 1894.0 | 1886.6 | 1894.9 | 1894.9 | 1894.9 | 1894.6 | 1894.6 | 1894.6 |
| gdb 3310 | 1890.7 <sup>a</sup> | 1900.1 | 1893.6 | 1895.9 | 1902.0 | 1898.2 | 1891.9 | 1894.9 | 1894.9 | 1894.9 | 1895.2 | 1895.2 | 1895.2 |
| gdb 3311 | 1905.5 <sup>a</sup> | 1909.6 | 1903.3 | 1908.8 | 1913.1 | 1906.2 | 1899.9 | 1901.2 | 1901.2 | 1901.2 | 1900.0 | 1900.0 | 1900.0 |
| gdb 3312 | 1908.0 <sup>a</sup> | 1910.4 | 1905.6 | 1909.0 | 1915.2 | 1907.7 | 1902.8 | 1905.1 | 1905.1 | 1905.1 | 1903.2 | 1903.2 | 1903.2 |
| gdb 3313 | 1898.1 <sup>a</sup> | 1911.4 | 1906.4 | 1905.7 | 1910.8 | 1906.0 | 1903.4 | 1901.9 | 1901.9 | 1901.9 | 1906.0 | 1906.0 | 1906.0 |
| gdb 3314 | 1877.2 <sup>a</sup> | 1895.7 | 1886.3 | 1885.7 | 1891.8 | 1886.4 | 1876.7 | 1877.3 | 1877.3 | 1877.3 | 1876.9 | 1876.9 | 1876.9 |
| gdb 3315 | 1910.3 <sup>a</sup> | 1902.4 | 1904.7 | 1907.6 | 1912.5 | 1909.8 | 1904.2 | 1915.8 | 1915.8 | 1915.8 | 1913.1 | 1913.1 | 1913.1 |
| gdb 3316 | 1911.8 <sup>a</sup> | 1906.4 | 1905.1 | 1909.5 | 1914.6 | 1912.4 | 1908.0 | 1919.7 | 1919.7 | 1919.7 | 1916.5 | 1916.5 | 1916.5 |
| gdb 3317 | 1907.5 <sup>a</sup> | 1901.1 | 1903.3 | 1907.0 | 1909.4 | 1907.0 | 1901.4 | 1913.0 | 1913.0 | 1913.0 | 1910.2 | 1910.2 | 1910.2 |
| gdb 3318 | 1916.1 <sup>a</sup> | 1915.7 | 1917.3 | 1918.2 | 1914.9 | 1914.3 | 1915.8 | 1920.9 | 1920.9 | 1920.9 | 1921.2 | 1921.2 | 1921.2 |
| gdb 3319 | 1888.1 <sup>a</sup> | 1894.2 | 1890.0 | 1892.3 | 1894.2 | 1890.5 | 1891.7 | 1893.9 | 1893.9 | 1893.9 | 1893.1 | 1893.1 | 1893.1 |
| gdb 3320 | 1884.1 <sup>a</sup> | 1893.0 | 1888.5 | 1891.7 | 1892.1 | 1888.3 | 1886.9 | 1888.2 | 1888.2 | 1888.2 | 1888.2 | 1888.2 | 1888.2 |
| gdb 3321 | 1892.1 <sup>a</sup> | 1904.3 | 1899.8 | 1900.6 | 1896.7 | 1894.1 | 1899.5 | 1895.0 | 1894.9 | 1894.9 | 1898.8 | 1898.8 | 1898.4 |
| gdb 3322 | 1896.3 <sup>a</sup> | 1891.6 | 1878.6 | 1891.7 | 1894.2 | 1887.7 | 1882.5 | 1891.5 | 1891.5 | 1891.5 | 1892.9 | 1892.9 | 1892.9 |
| gdb 3323 | 1896.8 <sup>a</sup> | 1891.8 | 1874.2 | 1888.7 | 1888.8 | 1882.8 | 1883.2 | 1890.0 | 1890.0 | 1890.0 | 1891.8 | 1891.8 | 1891.8 |
| gdb 3324 | 1886.8 <sup>a</sup> | 1876.3 | 1858.9 | 1874.5 | 1884.1 | 1876.6 | 1871.0 | 1884.0 | 1884.0 | 1884.0 | 1882.5 | 1882.5 | 1882.5 |
| gdb 3325 | 1884.5 <sup>a</sup> | 1876.7 | 1860.1 | 1874.7 | 1883.0 | 1875.0 | 1868.6 | 1881.3 | 1881.3 | 1881.3 | 1879.8 | 1879.7 | 1879.7 |
| gdb 3326 | 1892.3 <sup>a</sup> | 1883.1 | 1885.4 | 1887.6 | 1894.8 | 1890.5 | 1881.0 | 1896.1 | 1896.1 | 1896.1 | 1891.3 | 1891.3 | 1891.3 |
| gdb 3327 | 1894.7 <sup>a</sup> | 1883.1 | 1884.2 | 1887.3 | 1894.8 | 1891.9 | 1883.4 | 1898.4 | 1898.4 | 1898.4 | 1893.7 | 1893.7 | 1893.7 |
| gdb 3328 | 1889.9 <sup>a</sup> | 1882.6 | 1880.5 | 1884.0 | 1890.4 | 1886.3 | 1880.3 | 1893.6 | 1893.6 | 1893.6 | 1889.3 | 1889.3 | 1889.3 |
| gdb 3329 | 1902.4 <sup>a</sup> | 1897.7 | 1898.8 | 1900.1 | 1901.0 | 1898.8 | 1895.0 | 1903.4 | 1903.4 | 1903.4 | 1902.3 | 1902.3 | 1902.3 |

... continued on next page ...

Table S26: ... continued from previous page ...

| Molecule | Ref.                | MNDO   | AMI    | PM3    | PM6    | PM7    | OM1    | OM2    |        | OM3    |        | D3T    |
|----------|---------------------|--------|--------|--------|--------|--------|--------|--------|--------|--------|--------|--------|
|          |                     |        |        |        |        |        |        | D2     | D3     | D2     | D3     |        |
| gdb 3330 | 1831.8 <sup>a</sup> | 1821.7 | 1800.6 | 1815.3 | 1833.7 | 1820.3 | 1808.3 | 1820.3 | 1820.3 | 1815.8 | 1815.8 | 1815.8 |
| gdb 3331 | 1835.5 <sup>a</sup> | 1823.7 | 1807.5 | 1818.6 | 1840.5 | 1825.8 | 1811.3 | 1823.2 | 1823.2 | 1818.2 | 1818.2 | 1818.2 |
| gdb 3332 | 1832.8 <sup>a</sup> | 1823.1 | 1803.1 | 1817.6 | 1837.9 | 1823.2 | 1809.2 | 1820.6 | 1820.6 | 1816.0 | 1816.0 | 1816.0 |
| gdb 3333 | 1851.3 <sup>a</sup> | 1845.0 | 1830.1 | 1839.7 | 1853.9 | 1842.6 | 1830.3 | 1837.3 | 1837.3 | 1835.3 | 1835.3 | 1835.3 |
| gdb 3334 | 1851.1 <sup>a</sup> | 1845.4 | 1823.0 | 1837.3 | 1847.3 | 1836.7 | 1830.1 | 1834.8 | 1834.8 | 1833.5 | 1833.5 | 1833.5 |
| gdb 3335 | 1842.8 <sup>a</sup> | 1843.5 | 1821.6 | 1837.3 | 1850.8 | 1838.5 | 1829.1 | 1837.2 | 1837.2 | 1835.0 | 1835.0 | 1835.0 |
| gdb 3336 | 1844.6 <sup>a</sup> | 1844.8 | 1827.7 | 1839.9 | 1852.9 | 1840.7 | 1831.2 | 1839.3 | 1839.3 | 1836.9 | 1836.8 | 1836.8 |
| gdb 3337 | 1882.5 <sup>a</sup> | 1889.0 | 1873.4 | 1883.4 | 1891.4 | 1886.2 | 1875.3 | 1881.3 | 1881.3 | 1882.2 | 1882.2 | 1882.3 |
| gdb 3338 | 1872.6 <sup>a</sup> | 1872.2 | 1851.4 | 1865.9 | 1876.3 | 1869.9 | 1859.6 | 1866.0 | 1866.0 | 1866.2 | 1866.2 | 1866.2 |
| gdb 3339 | 1870.6 <sup>a</sup> | 1873.3 | 1853.2 | 1867.0 | 1878.4 | 1870.4 | 1858.4 | 1865.0 | 1865.0 | 1864.8 | 1864.7 | 1864.7 |
| gdb 3340 | 1841.4 <sup>a</sup> | 1844.8 | 1817.1 | 1828.9 | 1843.4 | 1835.5 | 1826.0 | 1826.4 | 1826.4 | 1821.4 | 1820.8 | 1820.9 |
| gdb 3341 | 1841.4 <sup>a</sup> | 1845.3 | 1818.7 | 1829.5 | 1843.1 | 1834.5 | 1824.1 | 1824.1 | 1824.1 | 1818.9 | 1818.9 | 1818.9 |
| gdb 3342 | 1849.5 <sup>a</sup> | 1860.8 | 1839.4 | 1846.0 | 1858.1 | 1851.1 | 1842.0 | 1840.8 | 1840.8 | 1837.1 | 1837.1 | 1837.1 |
| gdb 3343 | 1845.4 <sup>a</sup> | 1855.4 | 1828.1 | 1838.2 | 1853.2 | 1843.0 | 1834.8 | 1832.1 | 1832.1 | 1832.5 | 1832.5 | 1832.5 |
| gdb 3344 | 1845.7 <sup>a</sup> | 1857.3 | 1833.2 | 1842.1 | 1855.8 | 1844.4 | 1833.5 | 1830.9 | 1830.9 | 1831.3 | 1831.3 | 1831.3 |
| gdb 3345 | 1883.8 <sup>a</sup> | 1884.8 | 1867.4 | 1878.8 | 1883.8 | 1877.2 | 1872.4 | 1871.4 | 1871.4 | 1870.9 | 1870.8 | 1870.8 |
| gdb 3346 | 1864.9 <sup>a</sup> | 1870.2 | 1852.3 | 1864.5 | 1870.5 | 1864.2 | 1855.8 | 1855.7 | 1855.6 | 1857.4 | 1857.3 | 1857.3 |
| gdb 3347 | 1863.0 <sup>a</sup> | 1870.3 | 1852.3 | 1863.7 | 1868.3 | 1861.5 | 1853.1 | 1852.5 | 1852.5 | 1854.1 | 1854.0 | 1854.0 |
| gdb 3348 | 1872.9 <sup>a</sup> | 1886.4 | 1870.0 | 1878.1 | 1879.3 | 1876.1 | 1874.2 | 1870.5 | 1870.5 | 1873.6 | 1873.6 | 1873.6 |
| gdb 3349 | 1909.7 <sup>a</sup> | 1901.3 | 1904.9 | 1907.7 | 1914.3 | 1910.6 | 1903.2 | 1915.3 | 1915.3 | 1913.0 | 1913.0 | 1913.0 |
| gdb 3350 | 1928.6 <sup>a</sup> | 1910.3 | 1912.1 | 1916.8 | 1922.3 | 1918.2 | 1914.8 | 1924.8 | 1924.8 | 1921.4 | 1921.4 | 1921.4 |
| gdb 3351 | 1908.1 <sup>a</sup> | 1901.0 | 1903.3 | 1906.6 | 1910.0 | 1907.1 | 1900.9 | 1912.4 | 1912.4 | 1909.9 | 1909.9 | 1909.9 |
| gdb 3352 | 1916.9 <sup>a</sup> | 1913.9 | 1919.8 | 1921.0 | 1920.5 | 1918.5 | 1914.0 | 1921.6 | 1921.6 | 1922.3 | 1922.3 | 1922.3 |
| gdb 3353 | 1892.4 <sup>a</sup> | 1889.4 | 1889.4 | 1890.8 | 1897.6 | 1893.7 | 1883.6 | 1897.0 | 1897.0 | 1893.1 | 1893.1 | 1893.1 |
| gdb 3354 | 1892.6 <sup>a</sup> | 1889.0 | 1889.3 | 1890.8 | 1898.0 | 1893.8 | 1883.2 | 1897.0 | 1896.9 | 1893.1 | 1893.1 | 1893.1 |
| gdb 3355 | 1876.8 <sup>a</sup> | 1858.4 | 1857.8 | 1859.4 | 1873.1 | 1868.9 | 1862.3 | 1874.0 | 1874.0 | 1865.2 | 1865.2 | 1865.2 |
| gdb 3356 | 1889.6 <sup>a</sup> | 1874.3 | 1873.8 | 1876.8 | 1880.3 | 1878.7 | 1878.5 | 1882.8 | 1882.8 | 1877.2 | 1877.2 | 1877.2 |
| gdb 3357 | 1884.9 <sup>a</sup> | 1873.5 | 1877.8 | 1877.1 | 1888.4 | 1881.2 | 1873.2 | 1882.6 | 1882.6 | 1879.3 | 1879.3 | 1879.3 |
| gdb 3358 | 1856.4 <sup>a</sup> | 1849.5 | 1826.1 | 1839.6 | 1852.5 | 1844.3 | 1838.8 | 1848.0 | 1848.0 | 1840.7 | 1840.7 | 1840.7 |
| gdb 3359 | 1869.9 <sup>a</sup> | 1863.8 | 1843.7 | 1855.5 | 1861.7 | 1855.7 | 1852.1 | 1857.3 | 1857.3 | 1853.0 | 1853.0 | 1853.0 |
| gdb 3360 | 1864.3 <sup>a</sup> | 1862.7 | 1843.7 | 1853.2 | 1868.7 | 1857.1 | 1850.7 | 1857.4 | 1857.4 | 1855.5 | 1855.5 | 1855.5 |
| gdb 3361 | 1880.6 <sup>a</sup> | 1871.9 | 1863.6 | 1871.9 | 1877.5 | 1871.7 | 1869.8 | 1877.0 | 1877.0 | 1875.8 | 1875.8 | 1875.8 |
| gdb 3362 | 1891.4 <sup>a</sup> | 1886.7 | 1878.6 | 1888.3 | 1885.1 | 1879.5 | 1884.7 | 1886.1 | 1886.1 | 1887.2 | 1887.2 | 1887.2 |
| gdb 3363 | 1901.7 <sup>a</sup> | 1903.8 | 1911.6 | 1904.1 | 1911.2 | 1907.0 | 1897.3 | 1903.8 | 1903.8 | 1900.1 | 1900.1 | 1900.1 |
| gdb 3364 | 1899.8 <sup>a</sup> | 1903.0 | 1910.5 | 1903.3 | 1909.7 | 1905.5 | 1895.9 | 1902.4 | 1902.4 | 1898.6 | 1898.6 | 1898.6 |
| gdb 3365 | 1882.5 <sup>a</sup> | 1908.3 | 1885.5 | 1889.4 | 1899.2 | 1892.3 | 1886.8 | 1890.4 | 1890.4 | 1890.7 | 1890.7 | 1890.7 |
| gdb 3366 | 1885.5 <sup>a</sup> | 1909.3 | 1885.3 | 1900.3 | 1899.5 | 1892.7 | 1887.7 | 1891.8 | 1891.8 | 1892.2 | 1892.2 | 1892.2 |
| gdb 3367 | 1879.2 <sup>a</sup> | 1894.1 | 1868.7 | 1886.7 | 1891.2 | 1883.4 | 1872.8 | 1879.9 | 1879.9 | 1878.2 | 1878.2 | 1878.2 |
| gdb 3368 | 1879.2 <sup>a</sup> | 1895.4 | 1871.3 | 1888.0 | 1893.0 | 1884.6 | 1873.4 | 1880.1 | 1880.1 | 1878.5 | 1878.4 | 1878.4 |
| gdb 3369 | 1847.0 <sup>a</sup> | 1871.1 | 1834.7 | 1853.2 | 1863.4 | 1849.2 | 1833.3 | 1837.7 | 1837.7 | 1832.4 | 1832.3 | 1832.3 |
| gdb 3370 | 1845.7 <sup>a</sup> | 1871.4 | 1836.9 | 1854.1 | 1865.6 | 1851.0 | 1834.0 | 1837.2 | 1837.2 | 1832.1 | 1832.1 | 1832.1 |
| gdb 3371 | 1851.5 <sup>a</sup> | 1886.7 | 1855.7 | 1870.4 | 1877.9 | 1864.2 | 1848.0 | 1850.7 | 1850.7 | 1847.7 | 1847.7 | 1847.7 |
| gdb 3372 | 1854.5 <sup>a</sup> | 1886.9 | 1854.2 | 1878.8 | 1865.1 | 1849.4 | 1852.1 | 1852.1 | 1852.1 | 1849.3 | 1849.3 | 1849.3 |
| gdb 3373 | 1848.0 <sup>a</sup> | 1866.9 | 1835.2 | 1851.2 | 1858.2 | 1850.2 | 1840.0 | 1843.1 | 1843.1 | 1835.2 | 1835.2 | 1835.2 |
| gdb 3374 | 1850.0 <sup>a</sup> | 1867.4 | 1836.8 | 1852.2 | 1861.8 | 1853.2 | 1841.9 | 1845.2 | 1845.2 | 1837.5 | 1837.4 | 1837.5 |

... continued on next page ...

Table S26: ... continued from previous page. ...

| Molecule | Ref.                | MNDO   | AMI    | PM3    | PM6    | PM7    | OM1    | OM2    |        | OM3    |        | D3T    |
|----------|---------------------|--------|--------|--------|--------|--------|--------|--------|--------|--------|--------|--------|
|          |                     |        |        |        |        |        |        | D2     | D3     | D2     | D3     |        |
| gdb 3375 | 1854.3 <sup>a</sup> | 1882.9 | 1854.7 | 1867.0 | 1871.8 | 1864.4 | 1857.1 | 1857.9 | 1857.8 | 1857.9 | 1852.4 | 1852.4 |
| gdb 3376 | 1852.8 <sup>a</sup> | 1879.1 | 1851.3 | 1863.9 | 1875.2 | 1862.9 | 1852.4 | 1853.1 | 1853.1 | 1853.1 | 1850.7 | 1850.7 |
| gdb 3377 | 1852.3 <sup>a</sup> | 1878.9 | 1851.6 | 1863.9 | 1874.8 | 1862.7 | 1851.5 | 1852.5 | 1852.5 | 1852.5 | 1850.0 | 1850.0 |
| gdb 3378 | 1870.5 <sup>a</sup> | 1890.5 | 1872.6 | 1884.2 | 1885.6 | 1879.3 | 1872.0 | 1872.0 | 1872.0 | 1872.0 | 1870.6 | 1870.5 |
| gdb 3379 | 1871.0 <sup>a</sup> | 1889.7 | 1872.3 | 1883.9 | 1883.9 | 1877.9 | 1871.2 | 1871.4 | 1871.3 | 1871.4 | 1870.2 | 1870.2 |
| gdb 3380 | 1873.4 <sup>a</sup> | 1903.9 | 1889.5 | 1898.4 | 1896.0 | 1890.4 | 1884.6 | 1883.1 | 1883.1 | 1883.1 | 1884.2 | 1884.2 |
| gdb 3381 | 1887.2 <sup>a</sup> | 1903.6 | 1890.5 | 1893.9 | 1899.6 | 1892.9 | 1881.4 | 1885.8 | 1885.8 | 1885.8 | 1882.8 | 1882.8 |
| gdb 3382 | 1885.1 <sup>a</sup> | 1901.8 | 1886.7 | 1891.5 | 1896.7 | 1890.0 | 1880.1 | 1883.5 | 1883.5 | 1883.5 | 1881.0 | 1880.9 |
| gdb 3383 | 1913.5 <sup>a</sup> | 1923.4 | 1912.9 | 1921.4 | 1924.1 | 1918.0 | 1913.9 | 1918.3 | 1918.3 | 1918.3 | 1915.2 | 1915.2 |
| gdb 3384 | 1897.6 <sup>a</sup> | 1911.4 | 1901.5 | 1908.0 | 1912.6 | 1907.0 | 1899.7 | 1904.0 | 1904.0 | 1904.0 | 1903.0 | 1903.0 |
| gdb 3385 | 1897.6 <sup>a</sup> | 1911.5 | 1901.6 | 1908.0 | 1912.5 | 1907.2 | 1899.9 | 1904.2 | 1904.2 | 1904.2 | 1903.0 | 1903.0 |
| gdb 3386 | 1900.5 <sup>a</sup> | 1924.7 | 1915.6 | 1919.0 | 1918.5 | 1914.8 | 1912.5 | 1913.3 | 1913.3 | 1913.3 | 1914.5 | 1914.5 |
| gdb 3387 | 1863.4 <sup>a</sup> | 1870.9 | 1854.2 | 1860.7 | 1870.2 | 1864.5 | 1858.0 | 1861.6 | 1861.6 | 1861.6 | 1855.4 | 1855.4 |
| gdb 3388 | 1872.9 <sup>a</sup> | 1882.5 | 1866.4 | 1870.4 | 1876.9 | 1871.5 | 1872.0 | 1869.9 | 1869.9 | 1869.9 | 1867.5 | 1867.5 |
| gdb 3389 | 1866.4 <sup>a</sup> | 1880.2 | 1865.5 | 1870.4 | 1882.1 | 1872.8 | 1867.9 | 1866.7 | 1864.5 | 1864.5 | 1867.7 | 1867.7 |
| gdb 3390 | 1863.4 <sup>a</sup> | 1881.1 | 1865.8 | 1869.7 | 1879.4 | 1870.1 | 1866.1 | 1865.9 | 1865.8 | 1865.8 | 1865.7 | 1865.7 |
| gdb 3391 | 1877.3 <sup>a</sup> | 1881.7 | 1865.4 | 1873.4 | 1883.2 | 1871.9 | 1864.0 | 1871.6 | 1871.6 | 1871.6 | 1869.6 | 1869.6 |
| gdb 3392 | 1873.0 <sup>a</sup> | 1879.4 | 1859.2 | 1872.4 | 1876.0 | 1865.7 | 1858.0 | 1863.5 | 1863.5 | 1863.5 | 1862.3 | 1862.3 |
| gdb 3393 | 1871.1 <sup>a</sup> | 1878.7 | 1858.2 | 1869.0 | 1874.9 | 1864.6 | 1857.8 | 1863.6 | 1863.6 | 1863.6 | 1863.7 | 1863.7 |
| gdb 3394 | 1872.6 <sup>a</sup> | 1879.5 | 1859.8 | 1870.8 | 1879.1 | 1867.4 | 1861.6 | 1868.0 | 1868.0 | 1868.0 | 1867.4 | 1867.4 |
| gdb 3395 | 1879.9 <sup>a</sup> | 1891.5 | 1874.8 | 1882.3 | 1884.9 | 1875.4 | 1872.1 | 1873.7 | 1873.7 | 1873.7 | 1876.3 | 1876.3 |
| gdb 3396 | 1864.1 <sup>a</sup> | 1872.0 | 1856.8 | 1864.9 | 1876.7 | 1866.6 | 1851.9 | 1861.2 | 1861.2 | 1861.2 | 1855.0 | 1855.0 |
| gdb 3397 | 1873.8 <sup>a</sup> | 1884.3 | 1871.0 | 1877.6 | 1887.6 | 1877.5 | 1865.9 | 1870.5 | 1870.5 | 1870.5 | 1867.7 | 1867.7 |
| gdb 3398 | 1873.9 <sup>a</sup> | 1882.4 | 1873.9 | 1876.9 | 1889.8 | 1879.3 | 1866.9 | 1873.3 | 1873.3 | 1873.3 | 1869.9 | 1869.9 |
| gdb 3399 | 1869.2 <sup>a</sup> | 1882.6 | 1870.4 | 1874.9 | 1884.0 | 1874.2 | 1865.6 | 1870.8 | 1870.8 | 1870.8 | 1867.5 | 1867.5 |
| gdb 3400 | 1866.4 <sup>a</sup> | 1873.8 | 1859.6 | 1862.3 | 1873.4 | 1868.0 | 1862.4 | 1862.8 | 1862.8 | 1862.8 | 1857.2 | 1857.1 |
| gdb 3401 | 1876.6 <sup>a</sup> | 1885.4 | 1872.4 | 1872.7 | 1881.0 | 1875.1 | 1873.6 | 1868.6 | 1868.6 | 1868.6 | 1866.9 | 1866.9 |
| gdb 3402 | 1866.8 <sup>a</sup> | 1884.1 | 1872.0 | 1872.1 | 1884.6 | 1874.8 | 1866.8 | 1863.4 | 1863.4 | 1863.4 | 1864.0 | 1864.0 |
| gdb 3403 | 1866.3 <sup>a</sup> | 1885.1 | 1871.8 | 1871.8 | 1883.0 | 1873.4 | 1866.3 | 1862.8 | 1862.7 | 1862.7 | 1863.3 | 1863.3 |
| gdb 3404 | 1877.3 <sup>a</sup> | 1896.1 | 1886.1 | 1885.7 | 1892.4 | 1886.7 | 1876.5 | 1877.1 | 1877.1 | 1877.1 | 1876.9 | 1876.9 |
| gdb 3405 | 1876.0 <sup>a</sup> | 1891.6 | 1882.4 | 1884.3 | 1888.5 | 1882.9 | 1873.3 | 1874.4 | 1874.4 | 1874.4 | 1873.7 | 1873.7 |
| gdb 3406 | 1876.1 <sup>a</sup> | 1891.8 | 1880.8 | 1881.6 | 1888.3 | 1883.3 | 1872.6 | 1874.1 | 1874.1 | 1874.1 | 1873.6 | 1873.6 |
| gdb 3407 | 1885.6 <sup>a</sup> | 1904.6 | 1896.7 | 1893.4 | 1897.7 | 1892.4 | 1885.4 | 1881.8 | 1881.8 | 1881.8 | 1885.1 | 1885.1 |
| gdb 3408 | 1871.9 <sup>a</sup> | 1891.2 | 1882.9 | 1878.1 | 1884.7 | 1879.4 | 1874.9 | 1869.0 | 1869.0 | 1869.0 | 1869.7 | 1869.7 |
| gdb 3409 | 1909.4 <sup>a</sup> | 1910.1 | 1905.1 | 1908.2 | 1914.2 | 1906.4 | 1902.3 | 1904.8 | 1904.8 | 1904.8 | 1902.8 | 1902.8 |
| gdb 3410 | 1894.3 <sup>a</sup> | 1901.3 | 1897.1 | 1897.7 | 1904.7 | 1899.7 | 1893.8 | 1898.4 | 1898.4 | 1898.4 | 1897.4 | 1897.4 |
| gdb 3411 | 1893.0 <sup>a</sup> | 1901.0 | 1895.0 | 1897.1 | 1905.4 | 1900.0 | 1893.1 | 1897.2 | 1897.2 | 1897.2 | 1896.8 | 1896.8 |
| gdb 3412 | 1900.6 <sup>a</sup> | 1912.2 | 1906.4 | 1905.8 | 1910.1 | 1905.5 | 1904.9 | 1903.6 | 1903.6 | 1903.6 | 1907.1 | 1907.1 |
| gdb 3413 | 1887.8 <sup>a</sup> | 1895.9 | 1886.6 | 1891.4 | 1892.5 | 1889.2 | 1889.2 | 1892.5 | 1892.5 | 1892.5 | 1892.0 | 1892.0 |
| gdb 3414 | 1890.2 <sup>a</sup> | 1896.0 | 1890.1 | 1892.6 | 1893.7 | 1889.0 | 1888.9 | 1892.2 | 1892.1 | 1892.2 | 1891.2 | 1891.2 |
| gdb 3415 | 1887.5 <sup>a</sup> | 1895.7 | 1888.6 | 1892.6 | 1893.2 | 1889.0 | 1887.1 | 1890.3 | 1890.2 | 1890.3 | 1889.6 | 1889.6 |
| gdb 3416 | 1895.9 <sup>a</sup> | 1907.1 | 1899.8 | 1901.2 | 1897.7 | 1895.1 | 1900.5 | 1896.9 | 1896.9 | 1896.9 | 1900.1 | 1900.1 |
| gdb 3417 | 1886.7 <sup>a</sup> | 1895.2 | 1887.9 | 1893.5 | 1899.2 | 1892.6 | 1885.4 | 1892.2 | 1892.2 | 1892.2 | 1890.7 | 1890.7 |
| gdb 3418 | 1891.2 <sup>a</sup> | 1895.4 | 1889.5 | 1893.7 | 1901.2 | 1893.9 | 1886.2 | 1894.0 | 1894.0 | 1894.0 | 1892.6 | 1892.6 |
| gdb 3419 | 1898.6 <sup>a</sup> | 1909.6 | 1901.0 | 1904.1 | 1906.8 | 1901.3 | 1900.3 | 1900.9 | 1900.9 | 1900.9 | 1903.1 | 1903.1 |

... continued on next page ...

Table S26: ... continued from previous page ...

| Molecule | Ref.                | MNDO   | AMI    | PM3    | PM6    | PM7    | OM1    | OM2    |        | OM3    |        | D3T    |
|----------|---------------------|--------|--------|--------|--------|--------|--------|--------|--------|--------|--------|--------|
|          |                     |        |        |        |        |        |        | D2     | D3     | D2     | D3     |        |
| gdb 3420 | 1889.9 <sup>a</sup> | 1886.5 | 1892.7 | 1886.9 | 1898.4 | 1893.1 | 1881.3 | 1893.5 | 1893.4 | 1883.6 | 1883.6 | 1883.6 |
| gdb 3421 | 1897.5 <sup>a</sup> | 1896.0 | 1903.9 | 1897.1 | 1904.6 | 1900.3 | 1891.2 | 1897.9 | 1897.9 | 1894.1 | 1894.1 | 1894.1 |
| gdb 3422 | 1895.6 <sup>a</sup> | 1896.3 | 1904.1 | 1898.2 | 1903.5 | 1899.6 | 1890.6 | 1897.1 | 1897.1 | 1893.8 | 1893.8 | 1893.8 |
| gdb 3423 | 1894.0 <sup>a</sup> | 1914.7 | 1901.3 | 1908.2 | 1908.9 | 1902.8 | 1898.8 | 1903.2 | 1903.2 | 1901.9 | 1901.8 | 1901.8 |
| gdb 3424 | 1896.4 <sup>a</sup> | 1914.6 | 1903.5 | 1908.8 | 1911.3 | 1904.2 | 1898.8 | 1903.4 | 1903.4 | 1902.4 | 1902.4 | 1902.4 |
| gdb 3425 | 1896.9 <sup>a</sup> | 1915.8 | 1903.3 | 1909.7 | 1913.1 | 1906.4 | 1901.4 | 1905.9 | 1905.9 | 1904.7 | 1904.7 | 1904.7 |
| gdb 3426 | 1901.0 <sup>a</sup> | 1925.5 | 1912.6 | 1916.6 | 1913.8 | 1908.7 | 1909.9 | 1909.1 | 1909.1 | 1910.7 | 1910.7 | 1910.7 |
| gdb 3427 | 1871.0 <sup>a</sup> | 1891.4 | 1886.9 | 1880.7 | 1889.0 | 1881.2 | 1873.2 | 1868.5 | 1868.5 | 1868.9 | 1868.9 | 1868.9 |
| gdb 3428 | 1872.3 <sup>a</sup> | 1890.8 | 1882.3 | 1877.5 | 1885.0 | 1880.1 | 1874.6 | 1869.2 | 1869.2 | 1869.5 | 1869.5 | 1869.5 |
| gdb 3429 | 1915.3 <sup>a</sup> | 1917.0 | 1912.7 | 1916.5 | 1915.4 | 1914.9 | 1911.7 | 1918.8 | 1918.8 | 1919.7 | 1919.7 | 1919.7 |
| gdb 3430 | 1915.5 <sup>a</sup> | 1918.1 | 1913.7 | 1917.2 | 1914.3 | 1914.5 | 1911.7 | 1918.7 | 1918.6 | 1919.5 | 1919.5 | 1919.5 |
| gdb 3431 | 1910.9 <sup>a</sup> | 1917.5 | 1911.6 | 1916.1 | 1913.5 | 1913.9 | 1910.1 | 1917.0 | 1917.0 | 1917.8 | 1917.8 | 1917.8 |
| gdb 3432 | 1911.2 <sup>a</sup> | 1918.4 | 1911.8 | 1916.0 | 1913.3 | 1913.9 | 1910.5 | 1917.2 | 1917.2 | 1918.1 | 1918.1 | 1918.1 |
| gdb 3433 | 1889.9 <sup>a</sup> | 1898.0 | 1886.8 | 1891.6 | 1896.3 | 1890.6 | 1883.0 | 1888.6 | 1888.6 | 1890.4 | 1890.4 | 1890.4 |
| gdb 3434 | 1887.8 <sup>a</sup> | 1886.5 | 1874.0 | 1881.6 | 1887.0 | 1885.2 | 1875.2 | 1885.4 | 1885.4 | 1880.1 | 1880.1 | 1880.1 |
| gdb 3435 | 1888.1 <sup>a</sup> | 1887.6 | 1874.5 | 1882.1 | 1887.4 | 1885.7 | 1876.2 | 1885.9 | 1885.9 | 1880.7 | 1880.7 | 1880.7 |
| gdb 3436 | 1890.7 <sup>a</sup> | 1898.1 | 1888.6 | 1892.2 | 1898.0 | 1892.4 | 1884.4 | 1888.6 | 1888.6 | 1890.5 | 1890.5 | 1890.5 |
| gdb 3437 | 1884.7 <sup>a</sup> | 1889.7 | 1881.5 | 1884.8 | 1895.0 | 1889.0 | 1875.1 | 1884.0 | 1884.0 | 1880.0 | 1880.0 | 1880.0 |
| gdb 3438 | 1886.0 <sup>a</sup> | 1902.9 | 1889.5 | 1894.4 | 1900.1 | 1892.9 | 1880.1 | 1884.8 | 1884.8 | 1882.4 | 1882.4 | 1882.4 |
| gdb 3439 | 1886.8 <sup>a</sup> | 1903.9 | 1890.5 | 1894.2 | 1899.7 | 1892.9 | 1880.5 | 1884.9 | 1884.9 | 1882.1 | 1882.1 | 1882.1 |
| gdb 3440 | 1886.4 <sup>a</sup> | 1892.8 | 1881.4 | 1885.3 | 1889.5 | 1887.1 | 1880.5 | 1886.5 | 1886.5 | 1881.7 | 1881.7 | 1881.7 |
| gdb 3441 | 1905.0 <sup>a</sup> | 1913.7 | 1913.2 | 1913.9 | 1909.4 | 1909.4 | 1909.1 | 1911.0 | 1911.0 | 1912.6 | 1912.6 | 1912.6 |
| gdb 3442 | 1887.2 <sup>a</sup> | 1892.6 | 1885.9 | 1884.3 | 1891.8 | 1889.4 | 1882.8 | 1885.5 | 1885.5 | 1881.3 | 1881.3 | 1881.3 |
| gdb 3443 | 1912.2 <sup>a</sup> | 1918.4 | 1920.8 | 1918.8 | 1918.2 | 1920.0 | 1913.2 | 1918.9 | 1918.9 | 1920.1 | 1920.1 | 1920.1 |
| gdb 3444 | 1916.3 <sup>a</sup> | 1918.2 | 1918.1 | 1921.1 | 1922.3 | 1919.6 | 1910.4 | 1918.3 | 1918.3 | 1914.9 | 1914.9 | 1914.9 |
| gdb 3445 | 1865.1 <sup>a</sup> | 1875.1 | 1860.7 | 1865.2 | 1873.3 | 1865.9 | 1859.0 | 1862.9 | 1862.8 | 1859.9 | 1859.9 | 1859.9 |
| gdb 3446 | 1862.5 <sup>a</sup> | 1877.0 | 1860.2 | 1865.4 | 1869.8 | 1863.3 | 1856.6 | 1859.9 | 1859.9 | 1857.2 | 1857.2 | 1857.2 |
| gdb 3447 | 1877.4 <sup>a</sup> | 1897.2 | 1885.2 | 1884.9 | 1891.5 | 1884.8 | 1879.5 | 1881.1 | 1881.1 | 1881.1 | 1881.1 | 1881.1 |
| gdb 3448 | 1912.3 <sup>a</sup> | 1903.8 | 1905.5 | 1909.6 | 1909.8 | 1909.7 | 1906.7 | 1917.1 | 1917.1 | 1916.1 | 1916.1 | 1916.1 |
| gdb 3449 | 1915.2 <sup>a</sup> | 1906.4 | 1906.9 | 1911.8 | 1912.4 | 1912.9 | 1909.2 | 1919.6 | 1919.6 | 1918.9 | 1918.9 | 1918.9 |
| gdb 3450 | 1909.0 <sup>a</sup> | 1909.2 | 1906.2 | 1911.8 | 1909.4 | 1910.0 | 1906.8 | 1916.0 | 1916.0 | 1915.4 | 1915.4 | 1915.4 |
| gdb 3451 | 1911.2 <sup>a</sup> | 1910.2 | 1906.6 | 1913.1 | 1912.6 | 1913.3 | 1909.0 | 1918.9 | 1918.9 | 1918.5 | 1918.5 | 1918.5 |
| gdb 3452 | 1883.9 <sup>a</sup> | 1885.4 | 1876.6 | 1879.3 | 1883.2 | 1881.9 | 1878.3 | 1883.4 | 1883.4 | 1878.0 | 1878.0 | 1878.0 |
| gdb 3453 | 1885.5 <sup>a</sup> | 1894.6 | 1890.6 | 1890.8 | 1898.2 | 1892.7 | 1888.2 | 1891.8 | 1891.8 | 1891.5 | 1891.5 | 1891.5 |
| gdb 3454 | 1902.7 <sup>a</sup> | 1906.7 | 1909.6 | 1909.5 | 1904.9 | 1905.4 | 1907.1 | 1908.4 | 1908.4 | 1909.6 | 1909.5 | 1909.5 |
| gdb 3455 | 1885.8 <sup>a</sup> | 1888.3 | 1884.9 | 1881.7 | 1889.3 | 1887.1 | 1880.2 | 1883.4 | 1883.4 | 1878.5 | 1878.5 | 1878.5 |
| gdb 3456 | 1888.3 <sup>a</sup> | 1898.7 | 1896.6 | 1890.4 | 1903.1 | 1893.8 | 1889.6 | 1890.4 | 1890.4 | 1889.7 | 1889.7 | 1889.7 |
| gdb 3457 | 1902.1 <sup>a</sup> | 1906.8 | 1911.4 | 1911.5 | 1906.6 | 1906.8 | 1906.1 | 1909.2 | 1909.2 | 1910.5 | 1910.5 | 1910.5 |
| gdb 3458 | 1903.2 <sup>a</sup> | 1907.7 | 1911.5 | 1910.7 | 1907.1 | 1907.7 | 1908.6 | 1910.0 | 1910.0 | 1911.0 | 1911.0 | 1911.0 |
| gdb 3459 | 1887.1 <sup>a</sup> | 1894.9 | 1882.0 | 1887.1 | 1890.6 | 1885.5 | 1880.5 | 1885.1 | 1885.1 | 1886.5 | 1886.5 | 1886.5 |
| gdb 3460 | 1888.3 <sup>a</sup> | 1892.4 | 1882.8 | 1887.9 | 1892.8 | 1886.8 | 1879.3 | 1885.5 | 1885.5 | 1886.7 | 1886.7 | 1886.7 |
| gdb 3461 | 1889.6 <sup>a</sup> | 1883.8 | 1870.9 | 1880.1 | 1886.1 | 1884.4 | 1874.4 | 1885.2 | 1885.2 | 1879.7 | 1879.7 | 1879.7 |
| gdb 3462 | 1885.9 <sup>a</sup> | 1894.2 | 1879.8 | 1886.8 | 1889.1 | 1884.2 | 1878.1 | 1882.7 | 1882.7 | 1885.3 | 1885.3 | 1885.3 |
| gdb 3463 | 1885.4 <sup>a</sup> | 1884.1 | 1876.3 | 1881.8 | 1893.9 | 1887.1 | 1872.4 | 1884.0 | 1884.0 | 1879.1 | 1879.1 | 1879.1 |
| gdb 3464 | 1891.2 <sup>a</sup> | 1896.9 | 1892.1 | 1893.9 | 1899.5 | 1893.3 | 1884.4 | 1892.3 | 1892.3 | 1890.8 | 1890.7 | 1890.7 |

... continued on next page ...



Table S26: . . . continued from previous page. . . .

| Molecule | Ref.                | MNDO   | AMI    | PM3    | PM6    | PM7    | OM1    |        | OM2    |        | OM3    |        | D3T    |
|----------|---------------------|--------|--------|--------|--------|--------|--------|--------|--------|--------|--------|--------|--------|
|          |                     |        |        |        |        |        | D2     | D3     | D2     | D3T    | D2     | D3     |        |
| gdb 3465 | 1885.5 <sup>a</sup> | 1898.2 | 1885.1 | 1890.3 | 1895.6 | 1888.7 | 1878.9 | 1884.2 | 1884.2 | 1880.8 | 1880.8 | 1880.8 | 1880.8 |
| gdb 3466 | 1887.6 <sup>a</sup> | 1897.2 | 1885.1 | 1892.0 | 1899.3 | 1892.0 | 1878.9 | 1886.2 | 1886.2 | 1883.0 | 1883.0 | 1883.0 | 1883.0 |
| gdb 3467 | 1886.8 <sup>a</sup> | 1899.4 | 1885.7 | 1891.9 | 1896.0 | 1890.0 | 1880.1 | 1886.2 | 1886.2 | 1882.5 | 1882.5 | 1882.5 | 1882.5 |
| gdb 3468 | 1890.6 <sup>a</sup> | 1909.7 | 1897.9 | 1892.0 | 1904.3 | 1898.8 | 1892.4 | 1895.5 | 1895.5 | 1894.5 | 1894.5 | 1894.5 | 1894.5 |
| gdb 3469 | 1883.1 <sup>a</sup> | 1883.4 | 1876.3 | 1879.3 | 1884.3 | 1882.6 | 1877.0 | 1882.4 | 1882.4 | 1877.3 | 1877.3 | 1877.3 | 1877.3 |
| gdb 3470 | 1884.7 <sup>a</sup> | 1885.6 | 1877.8 | 1880.3 | 1884.3 | 1882.6 | 1878.8 | 1883.4 | 1883.4 | 1877.8 | 1877.8 | 1877.8 | 1877.8 |
| gdb 3471 | 1886.3 <sup>a</sup> | 1895.7 | 1890.2 | 1889.2 | 1896.4 | 1891.4 | 1888.6 | 1889.7 | 1889.7 | 1889.8 | 1889.8 | 1889.8 | 1889.8 |
| gdb 3472 | 1888.0 <sup>a</sup> | 1890.0 | 1884.5 | 1888.0 | 1895.3 | 1889.3 | 1880.7 | 1886.1 | 1886.1 | 1887.3 | 1887.3 | 1887.3 | 1887.3 |
| gdb 3473 | 1885.8 <sup>a</sup> | 1883.0 | 1875.8 | 1881.3 | 1893.6 | 1887.1 | 1873.0 | 1884.1 | 1884.1 | 1879.1 | 1879.1 | 1879.1 | 1879.1 |
| gdb 3474 | 1893.7 <sup>a</sup> | 1897.8 | 1891.3 | 1892.2 | 1897.5 | 1892.4 | 1887.6 | 1892.8 | 1892.8 | 1891.2 | 1891.2 | 1891.2 | 1891.2 |
| gdb 3475 | 1888.1 <sup>a</sup> | 1885.1 | 1883.5 | 1880.4 | 1889.9 | 1888.6 | 1881.4 | 1885.0 | 1885.0 | 1879.3 | 1879.3 | 1879.3 | 1879.3 |
| gdb 3476 | 1884.1 <sup>a</sup> | 1885.6 | 1883.0 | 1879.6 | 1887.9 | 1885.9 | 1878.9 | 1882.2 | 1882.2 | 1876.8 | 1876.8 | 1876.8 | 1876.8 |
| gdb 3477 | 1888.6 <sup>a</sup> | 1897.6 | 1898.7 | 1891.5 | 1902.4 | 1896.7 | 1890.2 | 1890.1 | 1890.1 | 1890.2 | 1890.2 | 1890.2 | 1890.2 |
| gdb 3478 | 1884.3 <sup>a</sup> | 1895.1 | 1884.7 | 1891.1 | 1896.1 | 1888.9 | 1877.5 | 1883.4 | 1883.4 | 1879.8 | 1879.8 | 1879.8 | 1879.8 |
| gdb 3479 | 1889.2 <sup>a</sup> | 1897.5 | 1886.3 | 1891.8 | 1899.1 | 1892.3 | 1880.6 | 1887.5 | 1887.5 | 1883.9 | 1883.9 | 1883.9 | 1883.9 |
| gdb 3480 | 1884.5 <sup>a</sup> | 1896.1 | 1883.7 | 1889.4 | 1893.7 | 1887.9 | 1878.4 | 1884.5 | 1884.5 | 1881.1 | 1881.1 | 1881.1 | 1881.1 |
| gdb 3481 | 1890.1 <sup>a</sup> | 1910.4 | 1901.6 | 1903.7 | 1906.6 | 1900.9 | 1894.8 | 1897.4 | 1897.4 | 1896.4 | 1896.4 | 1896.4 | 1896.4 |
| gdb 3482 | 1899.1 <sup>a</sup> | 1902.3 | 1907.5 | 1901.5 | 1910.6 | 1905.1 | 1893.9 | 1905.7 | 1905.7 | 1896.0 | 1896.0 | 1896.0 | 1896.0 |
| gdb 3483 | 1897.8 <sup>a</sup> | 1901.6 | 1906.4 | 1900.8 | 1909.2 | 1903.5 | 1892.6 | 1904.7 | 1904.7 | 1894.8 | 1894.8 | 1894.8 | 1894.8 |
| gdb 3484 | 1899.8 <sup>a</sup> | 1903.2 | 1910.6 | 1903.3 | 1910.8 | 1905.8 | 1896.5 | 1903.5 | 1903.5 | 1899.9 | 1899.9 | 1899.9 | 1899.9 |
| gdb 3485 | 1903.7 <sup>a</sup> | 1908.1 | 1912.4 | 1905.9 | 1914.1 | 1910.5 | 1901.5 | 1907.4 | 1907.4 | 1903.7 | 1903.7 | 1903.7 | 1903.7 |
| gdb 3486 | 1903.0 <sup>a</sup> | 1905.6 | 1912.7 | 1904.1 | 1911.8 | 1907.3 | 1899.2 | 1905.3 | 1905.3 | 1901.9 | 1901.9 | 1901.9 | 1901.9 |
| gdb 3487 | 1897.5 <sup>a</sup> | 1910.5 | 1908.6 | 1903.6 | 1908.7 | 1902.8 | 1896.7 | 1905.0 | 1905.0 | 1895.9 | 1895.9 | 1895.9 | 1895.9 |
| gdb 3488 | 1900.3 <sup>a</sup> | 1915.7 | 1915.3 | 1910.1 | 1913.5 | 1908.6 | 1903.3 | 1906.9 | 1906.9 | 1904.2 | 1904.2 | 1904.2 | 1904.2 |
| gdb 3489 | 1898.9 <sup>a</sup> | 1914.7 | 1915.9 | 1909.7 | 1912.4 | 1906.7 | 1901.5 | 1904.8 | 1904.8 | 1902.5 | 1902.5 | 1902.5 | 1902.5 |
| gdb 3490 | 1900.0 <sup>a</sup> | 1914.8 | 1914.2 | 1909.5 | 1913.3 | 1908.0 | 1902.8 | 1906.5 | 1906.5 | 1904.0 | 1904.0 | 1904.0 | 1904.0 |
| gdb 3491 | 1909.9 <sup>a</sup> | 1912.7 | 1917.9 | 1915.0 | 1919.9 | 1918.7 | 1909.9 | 1915.8 | 1915.8 | 1916.4 | 1916.4 | 1916.4 | 1916.4 |
| gdb 3492 | 1908.9 <sup>a</sup> | 1913.6 | 1915.5 | 1912.6 | 1914.6 | 1914.6 | 1909.8 | 1913.6 | 1913.6 | 1913.9 | 1913.9 | 1913.9 | 1913.9 |
| gdb 3493 | 1903.2 <sup>a</sup> | 1900.8 | 1906.3 | 1907.5 | 1902.8 | 1904.1 | 1905.0 | 1909.4 | 1909.4 | 1909.2 | 1909.2 | 1909.2 | 1909.2 |
| gdb 3494 | 1903.9 <sup>a</sup> | 1901.7 | 1907.2 | 1909.2 | 1905.8 | 1907.8 | 1906.9 | 1912.7 | 1912.7 | 1912.2 | 1912.2 | 1912.2 | 1912.2 |
| gdb 3495 | 1885.7 <sup>a</sup> | 1899.8 | 1888.5 | 1892.4 | 1899.0 | 1892.1 | 1882.4 | 1885.6 | 1885.6 | 1882.8 | 1882.8 | 1882.8 | 1882.8 |
| gdb 3496 | 1878.6 <sup>a</sup> | 1896.8 | 1886.2 | 1889.4 | 1892.4 | 1885.2 | 1877.5 | 1879.2 | 1879.2 | 1876.4 | 1876.4 | 1876.4 | 1876.4 |
| gdb 3497 | 1908.5 <sup>a</sup> | 1910.3 | 1912.4 | 1912.8 | 1917.0 | 1916.0 | 1910.8 | 1916.0 | 1916.0 | 1916.9 | 1916.9 | 1916.9 | 1916.9 |
| gdb 3498 | 1879.5 <sup>a</sup> | 1884.3 | 1878.9 | 1876.7 | 1881.1 | 1879.5 | 1880.1 | 1879.0 | 1879.0 | 1874.6 | 1874.6 | 1874.6 | 1874.6 |
| gdb 3499 | 1913.8 <sup>a</sup> | 1908.5 | 1915.2 | 1913.1 | 1916.4 | 1914.3 | 1911.1 | 1911.8 | 1911.8 | 1909.1 | 1909.1 | 1909.1 | 1909.1 |
| gdb 3500 | 1900.9 <sup>a</sup> | 1908.1 | 1913.4 | 1911.5 | 1907.5 | 1907.3 | 1907.2 | 1906.7 | 1906.7 | 1909.2 | 1909.2 | 1909.2 | 1909.2 |
| gdb 3501 | 1891.8 <sup>a</sup> | 1891.9 | 1885.2 | 1885.3 | 1892.9 | 1890.6 | 1882.0 | 1886.2 | 1886.2 | 1882.1 | 1882.1 | 1882.1 | 1882.1 |
| gdb 3502 | 1888.1 <sup>a</sup> | 1899.8 | 1896.3 | 1893.1 | 1903.5 | 1896.6 | 1887.4 | 1888.2 | 1888.2 | 1890.3 | 1890.3 | 1890.3 | 1890.3 |
| gdb 3503 | 1889.7 <sup>a</sup> | 1889.4 | 1884.0 | 1883.0 | 1892.3 | 1890.2 | 1880.9 | 1884.7 | 1884.7 | 1880.1 | 1880.1 | 1880.1 | 1880.1 |
| gdb 3504 | 1890.6 <sup>a</sup> | 1900.1 | 1897.4 | 1892.1 | 1901.4 | 1895.7 | 1887.9 | 1888.0 | 1887.9 | 1889.9 | 1889.9 | 1889.9 | 1889.9 |
| gdb 3505 | 1886.7 <sup>a</sup> | 1896.9 | 1889.6 | 1887.4 | 1898.3 | 1891.3 | 1879.8 | 1879.9 | 1879.9 | 1878.3 | 1878.3 | 1878.3 | 1878.3 |
| gdb 3506 | 1882.4 <sup>a</sup> | 1903.5 | 1894.4 | 1891.5 | 1899.1 | 1892.4 | 1883.9 | 1882.4 | 1882.4 | 1880.2 | 1880.2 | 1880.2 | 1880.2 |
| gdb 3507 | 1884.3 <sup>a</sup> | 1903.4 | 1892.4 | 1890.4 | 1898.7 | 1891.6 | 1882.8 | 1881.1 | 1881.1 | 1879.0 | 1879.0 | 1879.0 | 1879.0 |
| gdb 3508 | 1891.6 <sup>a</sup> | 1902.3 | 1910.7 | 1898.2 | 1905.6 | 1902.9 | 1895.4 | 1893.1 | 1893.1 | 1893.5 | 1893.5 | 1893.5 | 1893.5 |
| gdb 3509 | 1885.2 <sup>a</sup> | 1888.4 | 1881.8 | 1879.2 | 1885.7 | 1883.7 | 1879.9 | 1882.4 | 1882.4 | 1877.5 | 1877.5 | 1877.5 | 1877.5 |

. . . continued on next page . . .

Table S26: ... continued from previous page. ...

| Molecule | Ref.                | MNDO   | AMI    | PM3    | PM6    | PM7    | OM1    | OM2    |        | OM3    |        | D3T    |
|----------|---------------------|--------|--------|--------|--------|--------|--------|--------|--------|--------|--------|--------|
|          |                     |        |        |        |        |        |        | D2     | D3     | D2     | D3     |        |
| gdb 3510 | 1880.5 <sup>a</sup> | 1888.8 | 1882.6 | 1881.3 | 1891.3 | 1887.0 | 1878.0 | 1880.2 | 1880.2 | 1878.6 | 1878.5 | 1878.6 |
| gdb 3511 | 1895.2 <sup>a</sup> | 1900.2 | 1904.9 | 1901.7 | 1901.2 | 1901.6 | 1898.7 | 1901.4 | 1901.4 | 1899.1 | 1899.1 | 1899.1 |
| gdb 3512 | 1902.2 <sup>a</sup> | 1910.0 | 1914.5 | 1909.0 | 1905.9 | 1906.1 | 1907.5 | 1905.5 | 1905.4 | 1907.1 | 1907.1 | 1907.1 |
| gdb 3513 | 1879.0 <sup>a</sup> | 1885.9 | 1884.2 | 1878.1 | 1887.0 | 1884.2 | 1877.5 | 1876.9 | 1876.9 | 1873.1 | 1873.1 | 1873.1 |
| gdb 3514 | 1874.2 <sup>a</sup> | 1886.5 | 1882.4 | 1876.6 | 1888.7 | 1883.2 | 1877.4 | 1875.0 | 1875.0 | 1873.9 | 1873.9 | 1873.9 |
| gdb 3515 | 1906.4 <sup>a</sup> | 1908.4 | 1911.6 | 1910.4 | 1913.4 | 1911.3 | 1904.9 | 1907.8 | 1907.8 | 1904.4 | 1904.4 | 1904.4 |
| gdb 3516 | 1895.5 <sup>a</sup> | 1901.0 | 1904.8 | 1900.4 | 1905.8 | 1904.5 | 1896.6 | 1901.4 | 1901.4 | 1899.4 | 1899.4 | 1899.4 |
| gdb 3517 | 1903.1 <sup>a</sup> | 1913.2 | 1914.8 | 1911.3 | 1913.9 | 1912.7 | 1910.5 | 1910.6 | 1910.6 | 1911.3 | 1911.3 | 1911.3 |
| gdb 3518 | 1877.1 <sup>a</sup> | 1890.8 | 1895.3 | 1885.4 | 1894.2 | 1891.3 | 1880.0 | 1879.1 | 1879.1 | 1876.7 | 1876.7 | 1876.7 |
| gdb 3519 | 1916.2 <sup>a</sup> | 1919.9 | 1918.5 | 1925.7 | 1918.0 | 1920.2 | 1920.0 | 1926.9 | 1926.9 | 1929.4 | 1929.4 | 1929.4 |
| gdb 3520 | 1918.4 <sup>a</sup> | 1921.4 | 1918.5 | 1923.3 | 1924.0 | 1922.4 | 1913.0 | 1923.1 | 1923.1 | 1924.7 | 1924.7 | 1924.7 |
| gdb 3521 | 1930.5 <sup>a</sup> | 1919.8 | 1911.7 | 1921.6 | 1924.7 | 1921.8 | 1913.8 | 1924.9 | 1924.9 | 1922.5 | 1922.5 | 1922.5 |
| gdb 3522 | 1922.8 <sup>a</sup> | 1925.0 | 1924.9 | 1930.5 | 1929.7 | 1930.6 | 1928.9 | 1937.3 | 1937.3 | 1939.7 | 1939.7 | 1939.7 |
| gdb 3523 | 1909.7 <sup>a</sup> | 1914.1 | 1918.0 | 1915.3 | 1919.9 | 1918.4 | 1909.7 | 1915.7 | 1915.7 | 1916.3 | 1916.3 | 1916.3 |
| gdb 3524 | 1906.9 <sup>a</sup> | 1913.2 | 1915.4 | 1913.2 | 1914.6 | 1913.8 | 1908.7 | 1912.5 | 1912.4 | 1912.4 | 1912.4 | 1912.4 |
| gdb 3525 | 1916.5 <sup>a</sup> | 1913.4 | 1913.9 | 1917.3 | 1921.0 | 1918.3 | 1911.8 | 1918.6 | 1918.6 | 1914.8 | 1914.8 | 1914.8 |
| gdb 3526 | 1898.9 <sup>a</sup> | 1904.8 | 1897.0 | 1909.9 | 1906.6 | 1904.8 | 1902.5 | 1909.0 | 1909.0 | 1910.5 | 1910.5 | 1910.5 |
| gdb 3527 | 1878.8 <sup>a</sup> | 1900.9 | 1873.5 | 1890.3 | 1894.0 | 1886.1 | 1877.2 | 1880.9 | 1880.9 | 1879.3 | 1879.2 | 1879.2 |
| gdb 3528 | 1875.4 <sup>a</sup> | 1900.0 | 1875.9 | 1890.5 | 1894.7 | 1885.1 | 1874.0 | 1877.3 | 1877.3 | 1876.0 | 1876.0 | 1876.0 |
| gdb 3529 | 1901.1 <sup>a</sup> | 1908.6 | 1882.5 | 1899.5 | 1906.9 | 1897.2 | 1888.5 | 1890.6 | 1890.6 | 1888.5 | 1888.5 | 1888.5 |
| gdb 3530 | 1883.9 <sup>a</sup> | 1913.0 | 1889.9 | 1902.0 | 1904.9 | 1897.1 | 1891.5 | 1892.2 | 1892.2 | 1893.2 | 1893.2 | 1893.2 |
| gdb 3531 | 1906.5 <sup>a</sup> | 1912.0 | 1902.8 | 1914.9 | 1919.0 | 1915.1 | 1907.3 | 1914.8 | 1914.8 | 1917.3 | 1917.2 | 1917.2 |
| gdb 3532 | 1875.0 <sup>a</sup> | 1884.9 | 1868.6 | 1878.3 | 1883.7 | 1879.5 | 1875.4 | 1877.1 | 1877.1 | 1874.2 | 1874.1 | 1874.1 |
| gdb 3533 | 1897.4 <sup>a</sup> | 1892.4 | 1873.6 | 1885.2 | 1897.2 | 1888.6 | 1884.5 | 1884.4 | 1884.4 | 1883.3 | 1883.3 | 1883.3 |
| gdb 3534 | 1879.3 <sup>a</sup> | 1896.3 | 1879.6 | 1886.5 | 1894.5 | 1887.6 | 1886.2 | 1885.0 | 1885.0 | 1886.7 | 1886.7 | 1886.7 |
| gdb 3535 | 1898.1 <sup>a</sup> | 1910.1 | 1902.7 | 1912.0 | 1908.8 | 1906.6 | 1904.9 | 1906.0 | 1906.0 | 1909.5 | 1909.5 | 1909.5 |
| gdb 3536 | 1905.6 <sup>a</sup> | 1907.5 | 1901.1 | 1905.5 | 1910.8 | 1906.2 | 1904.4 | 1909.9 | 1909.9 | 1911.7 | 1911.7 | 1911.7 |
| gdb 3537 | 1902.2 <sup>a</sup> | 1894.9 | 1884.8 | 1894.6 | 1897.0 | 1897.0 | 1893.5 | 1902.2 | 1902.2 | 1898.5 | 1898.5 | 1898.5 |
| gdb 3538 | 1903.9 <sup>a</sup> | 1907.3 | 1898.0 | 1904.8 | 1905.0 | 1901.7 | 1901.2 | 1904.8 | 1904.8 | 1908.4 | 1908.4 | 1908.4 |
| gdb 3539 | 1916.2 <sup>a</sup> | 1905.2 | 1895.9 | 1905.4 | 1913.3 | 1906.6 | 1903.4 | 1911.8 | 1911.8 | 1909.4 | 1909.4 | 1909.4 |
| gdb 3540 | 1895.8 <sup>a</sup> | 1899.9 | 1888.5 | 1896.3 | 1903.9 | 1900.6 | 1897.2 | 1902.3 | 1902.3 | 1903.0 | 1902.8 | 1902.8 |
| gdb 3541 | 1895.3 <sup>a</sup> | 1898.5 | 1889.2 | 1895.5 | 1895.5 | 1895.6 | 1895.0 | 1900.1 | 1900.1 | 1896.7 | 1896.7 | 1896.7 |
| gdb 3542 | 1914.1 <sup>a</sup> | 1910.2 | 1901.2 | 1908.5 | 1915.9 | 1909.7 | 1909.0 | 1913.9 | 1913.8 | 1911.5 | 1911.5 | 1911.5 |
| gdb 3543 | 1903.1 <sup>a</sup> | 1910.1 | 1904.8 | 1906.5 | 1912.5 | 1908.3 | 1908.6 | 1911.4 | 1911.4 | 1913.1 | 1913.1 | 1913.1 |
| gdb 3544 | 1905.3 <sup>a</sup> | 1904.9 | 1899.7 | 1903.9 | 1910.6 | 1905.3 | 1902.8 | 1909.0 | 1909.0 | 1910.5 | 1910.5 | 1910.5 |
| gdb 3545 | 1903.2 <sup>a</sup> | 1904.7 | 1897.4 | 1903.8 | 1906.9 | 1902.9 | 1901.2 | 1906.2 | 1906.2 | 1909.4 | 1909.4 | 1909.4 |
| gdb 3546 | 1901.8 <sup>a</sup> | 1893.8 | 1884.3 | 1894.5 | 1897.1 | 1896.9 | 1892.5 | 1902.1 | 1902.1 | 1898.4 | 1898.4 | 1898.4 |
| gdb 3547 | 1916.1 <sup>a</sup> | 1903.8 | 1896.1 | 1905.8 | 1914.1 | 1907.0 | 1902.9 | 1911.8 | 1911.8 | 1909.6 | 1909.5 | 1909.5 |
| gdb 3548 | 1896.3 <sup>a</sup> | 1888.3 | 1895.0 | 1902.0 | 1897.0 | 1897.7 | 1889.5 | 1897.7 | 1897.7 | 1895.1 | 1895.1 | 1895.1 |
| gdb 3549 | 1912.1 <sup>a</sup> | 1903.2 | 1899.5 | 1906.9 | 1913.7 | 1907.1 | 1901.4 | 1909.2 | 1909.2 | 1905.3 | 1905.3 | 1905.3 |
| gdb 3550 | 1902.6 <sup>a</sup> | 1907.2 | 1904.0 | 1906.1 | 1911.4 | 1906.8 | 1902.9 | 1907.5 | 1907.5 | 1907.9 | 1907.9 | 1907.9 |
| gdb 3551 | 1898.1 <sup>a</sup> | 1910.7 | 1900.5 | 1907.2 | 1911.4 | 1905.6 | 1897.7 | 1901.6 | 1901.6 | 1900.5 | 1900.5 | 1900.5 |
| gdb 3552 | 1893.7 <sup>a</sup> | 1909.5 | 1897.8 | 1905.2 | 1906.3 | 1901.2 | 1894.0 | 1897.5 | 1897.5 | 1896.5 | 1896.5 | 1896.5 |
| gdb 3553 | 1913.9 <sup>a</sup> | 1922.7 | 1912.2 | 1920.4 | 1924.5 | 1917.8 | 1913.3 | 1917.2 | 1917.2 | 1914.4 | 1914.4 | 1914.4 |
| gdb 3554 | 1901.8 <sup>a</sup> | 1924.0 | 1915.6 | 1918.7 | 1921.4 | 1916.4 | 1912.6 | 1914.1 | 1914.1 | 1915.3 | 1915.3 | 1915.3 |

... continued on next page ...

Table S26: ... continued from previous page ...

| Molecule | Ref.                | MNDO   | AMI    | PM3    | PM6    | PM7    | OM1    | OM2    |        | OM3    |        | D3     | D3T    |
|----------|---------------------|--------|--------|--------|--------|--------|--------|--------|--------|--------|--------|--------|--------|
|          |                     |        |        |        |        |        |        | D2     | D3     | D2     | D3     |        |        |
| gdb 3555 | 1917.0 <sup>a</sup> | 1918.2 | 1923.1 | 1921.3 | 1927.9 | 1924.9 | 1912.6 | 1921.2 | 1921.2 | 1922.4 | 1922.4 | 1922.3 | 1922.3 |
| gdb 3556 | 1924.3 <sup>a</sup> | 1917.4 | 1917.8 | 1921.1 | 1927.1 | 1922.6 | 1912.9 | 1921.2 | 1921.2 | 1921.2 | 1918.0 | 1918.0 | 1918.0 |
| gdb 3557 | 1914.0 <sup>a</sup> | 1912.5 | 1918.6 | 1915.0 | 1918.8 | 1917.3 | 1911.9 | 1917.6 | 1917.6 | 1917.8 | 1917.8 | 1917.8 | 1917.8 |
| gdb 3558 | 1911.7 <sup>a</sup> | 1911.7 | 1914.9 | 1912.2 | 1914.9 | 1913.8 | 1909.5 | 1914.6 | 1914.6 | 1914.9 | 1914.8 | 1914.8 | 1914.8 |
| gdb 3559 | 1920.7 <sup>a</sup> | 1910.4 | 1913.5 | 1915.9 | 1919.9 | 1916.8 | 1910.0 | 1917.3 | 1917.3 | 1913.2 | 1913.2 | 1913.2 | 1913.2 |
| gdb 3560 | 1924.8 <sup>a</sup> | 1922.1 | 1928.2 | 1930.3 | 1933.5 | 1932.3 | 1926.4 | 1934.1 | 1934.0 | 1937.0 | 1937.0 | 1937.0 | 1937.0 |
| gdb 3561 | 1912.7 <sup>a</sup> | 1918.5 | 1922.1 | 1920.4 | 1926.7 | 1923.9 | 1911.0 | 1918.6 | 1918.6 | 1920.2 | 1920.1 | 1920.1 | 1920.1 |
| gdb 3562 | 1919.7 <sup>a</sup> | 1918.5 | 1918.1 | 1922.4 | 1927.8 | 1923.7 | 1913.3 | 1920.4 | 1920.4 | 1917.5 | 1917.4 | 1917.4 | 1917.4 |
| gdb 3563 | 1897.6 <sup>a</sup> | 1897.6 | 1891.3 | 1897.0 | 1901.9 | 1900.6 | 1897.3 | 1903.4 | 1903.4 | 1900.5 | 1900.5 | 1900.5 | 1900.5 |
| gdb 3564 | 1910.7 <sup>a</sup> | 1907.0 | 1897.5 | 1907.0 | 1913.3 | 1907.9 | 1904.6 | 1908.8 | 1908.8 | 1908.3 | 1908.3 | 1908.3 | 1908.3 |
| gdb 3565 | 1911.7 <sup>a</sup> | 1908.2 | 1901.0 | 1909.0 | 1917.3 | 1910.5 | 1907.5 | 1913.2 | 1913.2 | 1911.1 | 1911.1 | 1911.1 | 1911.1 |
| gdb 3566 | 1899.7 <sup>a</sup> | 1908.8 | 1906.3 | 1909.0 | 1916.5 | 1911.3 | 1906.9 | 1911.5 | 1911.5 | 1913.7 | 1913.7 | 1913.7 | 1913.7 |
| gdb 3567 | 1917.8 <sup>a</sup> | 1920.3 | 1924.8 | 1927.9 | 1922.0 | 1923.0 | 1924.7 | 1928.5 | 1928.5 | 1931.8 | 1931.8 | 1931.8 | 1931.8 |
| gdb 3568 | 1898.9 <sup>a</sup> | 1895.9 | 1891.6 | 1893.7 | 1900.7 | 1899.6 | 1895.6 | 1899.6 | 1899.6 | 1896.7 | 1896.6 | 1896.7 | 1896.7 |
| gdb 3569 | 1906.0 <sup>a</sup> | 1904.6 | 1901.0 | 1906.6 | 1912.4 | 1905.6 | 1898.8 | 1902.2 | 1902.2 | 1900.5 | 1900.5 | 1900.5 | 1900.5 |
| gdb 3570 | 1910.8 <sup>a</sup> | 1906.5 | 1902.2 | 1906.2 | 1915.7 | 1908.8 | 1905.6 | 1909.3 | 1909.3 | 1906.7 | 1906.6 | 1906.6 | 1906.6 |
| gdb 3571 | 1900.6 <sup>a</sup> | 1907.0 | 1906.8 | 1905.5 | 1915.7 | 1910.1 | 1904.2 | 1906.8 | 1906.8 | 1909.2 | 1909.2 | 1909.2 | 1909.2 |
| gdb 3572 | 1912.3 <sup>a</sup> | 1918.4 | 1921.9 | 1920.2 | 1925.1 | 1923.4 | 1911.5 | 1918.8 | 1918.8 | 1920.3 | 1920.3 | 1920.3 | 1920.3 |
| gdb 3573 | 1919.4 <sup>a</sup> | 1917.3 | 1917.7 | 1922.3 | 1926.3 | 1923.2 | 1912.1 | 1920.6 | 1920.6 | 1917.4 | 1917.4 | 1917.4 | 1917.4 |
| gdb 3574 | 1923.3 <sup>a</sup> | 1921.6 | 1927.4 | 1928.5 | 1930.8 | 1931.5 | 1926.8 | 1934.4 | 1934.4 | 1936.9 | 1936.9 | 1936.9 | 1936.9 |
| gdb 3575 | 1911.2 <sup>a</sup> | 1909.7 | 1914.9 | 1913.6 | 1916.9 | 1912.9 | 1905.4 | 1908.5 | 1908.5 | 1906.0 | 1906.0 | 1906.0 | 1906.0 |
| gdb 3576 | 1913.5 <sup>a</sup> | 1910.7 | 1913.9 | 1913.0 | 1918.6 | 1914.8 | 1909.3 | 1912.0 | 1912.0 | 1909.5 | 1909.5 | 1909.5 | 1909.5 |
| gdb 3577 | 1904.5 <sup>a</sup> | 1913.3 | 1915.0 | 1909.7 | 1915.6 | 1914.5 | 1910.8 | 1910.9 | 1910.9 | 1912.2 | 1912.1 | 1912.1 | 1912.1 |
| gdb 3578 | 1865.5 <sup>a</sup> | 1879.2 | 1875.2 | 1877.8 | 1877.4 | 1872.3 | 1865.2 | 1871.7 | 1871.7 | 1869.8 | 1869.8 | 1869.8 | 1869.8 |
| gdb 3579 | 1860.9 <sup>a</sup> | 1866.7 | 1856.8 | 1864.8 | 1866.6 | 1861.2 | 1851.8 | 1861.1 | 1861.1 | 1856.4 | 1856.3 | 1856.3 | 1856.3 |
| gdb 3580 | 1906.4 <sup>a</sup> | 1912.9 | 1902.3 | 1914.2 | 1917.1 | 1914.1 | 1908.0 | 1914.9 | 1914.9 | 1917.1 | 1917.0 | 1917.1 | 1917.1 |
| gdb 3581 | 1863.6 <sup>a</sup> | 1878.8 | 1875.2 | 1877.3 | 1875.4 | 1869.6 | 1861.7 | 1868.6 | 1868.6 | 1866.3 | 1866.3 | 1866.3 | 1866.3 |
| gdb 3582 | 1860.1 <sup>a</sup> | 1875.8 | 1870.6 | 1876.0 | 1876.3 | 1868.0 | 1862.2 | 1869.9 | 1869.9 | 1867.7 | 1864.0 | 1867.7 | 1867.7 |
| gdb 3583 | 1862.9 <sup>a</sup> | 1880.1 | 1874.9 | 1877.5 | 1875.5 | 1870.0 | 1864.0 | 1870.2 | 1870.2 | 1867.8 | 1867.8 | 1867.8 | 1867.8 |
| gdb 3584 | 1860.8 <sup>a</sup> | 1867.0 | 1856.9 | 1865.5 | 1866.9 | 1861.3 | 1850.0 | 1860.5 | 1860.5 | 1855.7 | 1855.6 | 1855.7 | 1855.7 |
| gdb 3585 | 1864.4 <sup>a</sup> | 1878.4 | 1871.5 | 1875.6 | 1875.9 | 1871.0 | 1863.5 | 1868.4 | 1868.4 | 1867.2 | 1867.1 | 1867.1 | 1867.1 |
| gdb 3586 | 1901.1 <sup>a</sup> | 1908.2 | 1898.5 | 1911.8 | 1906.3 | 1905.4 | 1904.3 | 1910.2 | 1910.1 | 1911.5 | 1911.4 | 1911.4 | 1911.4 |
| gdb 3587 | 1903.7 <sup>a</sup> | 1903.8 | 1907.1 | 1909.0 | 1906.3 | 1905.0 | 1905.2 | 1910.1 | 1910.1 | 1910.0 | 1910.0 | 1910.0 | 1910.0 |
| gdb 3588 | 1906.4 <sup>a</sup> | 1905.8 | 1907.5 | 1910.1 | 1904.1 | 1905.7 | 1906.2 | 1911.1 | 1911.1 | 1911.0 | 1910.9 | 1911.0 | 1911.0 |
| gdb 3589 | 1900.4 <sup>a</sup> | 1895.6 | 1893.6 | 1900.3 | 1901.6 | 1902.1 | 1899.6 | 1909.6 | 1909.6 | 1906.2 | 1906.2 | 1906.2 | 1906.2 |
| gdb 3590 | 1862.3 <sup>a</sup> | 1879.7 | 1874.4 | 1878.1 | 1877.1 | 1871.0 | 1864.5 | 1866.5 | 1866.5 | 1866.5 | 1866.4 | 1866.4 | 1866.4 |
| gdb 3591 | 1918.6 <sup>a</sup> | 1923.1 | 1917.4 | 1922.0 | 1919.5 | 1919.3 | 1914.1 | 1922.0 | 1922.0 | 1923.5 | 1923.4 | 1923.4 | 1923.4 |
| gdb 3592 | 1908.6 <sup>a</sup> | 1919.8 | 1916.9 | 1918.2 | 1913.3 | 1913.1 | 1911.2 | 1914.1 | 1914.1 | 1915.6 | 1915.6 | 1915.6 | 1915.6 |
| gdb 3593 | 1865.3 <sup>a</sup> | 1883.8 | 1864.2 | 1870.7 | 1875.5 | 1868.1 | 1858.8 | 1862.6 | 1862.6 | 1860.9 | 1860.9 | 1860.9 | 1860.9 |
| gdb 3594 | 1887.3 <sup>a</sup> | 1892.3 | 1881.5 | 1885.0 | 1890.0 | 1887.6 | 1881.0 | 1886.3 | 1886.3 | 1881.4 | 1881.3 | 1881.3 | 1881.3 |
| gdb 3595 | 1905.4 <sup>a</sup> | 1914.6 | 1915.2 | 1915.3 | 1912.1 | 1912.2 | 1910.6 | 1912.6 | 1912.6 | 1914.2 | 1914.1 | 1914.2 | 1914.2 |
| gdb 3596 | 1886.9 <sup>a</sup> | 1891.5 | 1887.0 | 1884.9 | 1893.8 | 1891.0 | 1881.0 | 1885.5 | 1885.5 | 1880.9 | 1880.9 | 1880.9 | 1880.9 |
| gdb 3597 | 1910.9 <sup>a</sup> | 1919.5 | 1917.5 | 1917.5 | 1922.2 | 1918.4 | 1915.9 | 1915.9 | 1915.9 | 1917.1 | 1917.1 | 1917.1 | 1917.1 |
| gdb 3598 | 1914.8 <sup>a</sup> | 1921.1 | 1917.8 | 1924.6 | 1916.2 | 1919.2 | 1920.3 | 1926.6 | 1926.6 | 1928.5 | 1928.5 | 1928.5 | 1928.5 |
| gdb 3599 | 1910.9 <sup>a</sup> | 1914.0 | 1915.7 | 1911.7 | 1913.2 | 1913.3 | 1910.1 | 1914.3 | 1914.3 | 1914.4 | 1914.3 | 1914.3 | 1914.3 |

... continued on next page ...

Table S26: ... continued from previous page. ...

| Molecule | Ref.                | MNDO   | AMI    | PM3    | PM6    | PM7    | OM1    | OM2    |        | OM3    |        | D3T    |
|----------|---------------------|--------|--------|--------|--------|--------|--------|--------|--------|--------|--------|--------|
|          |                     |        |        |        |        |        |        | D2     | D3     | D2     | D3     |        |
| gdb 3600 | 1912.1 <sup>a</sup> | 1912.5 | 1915.9 | 1912.1 | 1914.2 | 1913.8 | 1910.8 | 1915.6 | 1915.6 | 1915.4 | 1915.4 | 1915.4 |
| gdb 3601 | 1906.6 <sup>a</sup> | 1903.0 | 1903.4 | 1902.9 | 1908.4 | 1908.9 | 1903.4 | 1911.8 | 1911.8 | 1908.5 | 1908.5 | 1908.5 |
| gdb 3602 | 1871.1 <sup>a</sup> | 1882.2 | 1882.2 | 1878.4 | 1879.2 | 1874.9 | 1873.8 | 1878.8 | 1878.8 | 1875.0 | 1875.0 | 1875.0 |
| gdb 3603 | 1871.3 <sup>a</sup> | 1878.5 | 1878.3 | 1876.5 | 1880.7 | 1874.9 | 1869.2 | 1880.5 | 1880.5 | 1870.9 | 1870.9 | 1870.9 |
| gdb 3604 | 1878.5 <sup>a</sup> | 1890.4 | 1895.9 | 1887.1 | 1886.2 | 1882.0 | 1882.4 | 1882.6 | 1882.6 | 1882.4 | 1882.4 | 1882.4 |
| gdb 3605 | 1907.8 <sup>a</sup> | 1914.9 | 1914.0 | 1913.7 | 1908.4 | 1909.2 | 1910.5 | 1912.1 | 1912.1 | 1912.8 | 1912.7 | 1912.7 |
| gdb 3606 | 1902.8 <sup>a</sup> | 1913.5 | 1913.6 | 1914.6 | 1908.2 | 1908.4 | 1907.2 | 1910.4 | 1910.4 | 1911.7 | 1911.6 | 1911.6 |
| gdb 3607 | 1899.0 <sup>a</sup> | 1903.7 | 1899.1 | 1903.9 | 1903.0 | 1902.6 | 1901.0 | 1907.8 | 1907.8 | 1905.8 | 1905.8 | 1905.8 |
| gdb 3608 | 1864.2 <sup>a</sup> | 1877.8 | 1872.8 | 1874.2 | 1872.5 | 1867.7 | 1863.9 | 1868.4 | 1868.4 | 1865.9 | 1865.9 | 1865.9 |
| gdb 3609 | 1861.9 <sup>a</sup> | 1877.4 | 1868.6 | 1875.5 | 1872.8 | 1866.3 | 1864.2 | 1869.9 | 1869.9 | 1867.0 | 1866.9 | 1866.9 |
| gdb 3610 | 1858.5 <sup>a</sup> | 1865.9 | 1855.0 | 1863.5 | 1864.2 | 1858.9 | 1849.8 | 1858.5 | 1858.5 | 1854.0 | 1853.9 | 1853.9 |
| gdb 3611 | 1858.7 <sup>a</sup> | 1883.2 | 1879.0 | 1879.7 | 1875.8 | 1869.8 | 1864.2 | 1863.0 | 1863.0 | 1863.6 | 1863.6 | 1863.6 |
| gdb 3612 | 1892.6 <sup>a</sup> | 1903.1 | 1910.2 | 1897.3 | 1906.3 | 1902.8 | 1893.2 | 1892.3 | 1892.3 | 1893.3 | 1893.3 | 1893.3 |
| gdb 3613 | 1892.9 <sup>a</sup> | 1905.3 | 1899.2 | 1909.6 | 1898.4 | 1899.9 | 1902.0 | 1903.2 | 1903.2 | 1904.2 | 1904.1 | 1904.1 |
| gdb 3614 | 1892.6 <sup>a</sup> | 1908.6 | 1897.6 | 1907.8 | 1897.9 | 1899.7 | 1901.7 | 1901.6 | 1901.6 | 1903.4 | 1903.3 | 1903.3 |
| gdb 3615 | 1874.9 <sup>a</sup> | 1885.8 | 1868.1 | 1877.6 | 1881.9 | 1878.4 | 1875.9 | 1877.1 | 1877.1 | 1873.8 | 1873.8 | 1873.8 |
| gdb 3616 | 1876.0 <sup>a</sup> | 1884.5 | 1864.5 | 1875.7 | 1884.1 | 1877.5 | 1873.8 | 1876.4 | 1876.4 | 1875.2 | 1875.2 | 1875.2 |
| gdb 3617 | 1879.1 <sup>a</sup> | 1897.9 | 1880.8 | 1888.5 | 1892.2 | 1886.0 | 1886.3 | 1884.0 | 1884.0 | 1885.6 | 1885.6 | 1885.6 |
| gdb 3618 | 1906.5 <sup>a</sup> | 1914.3 | 1915.3 | 1915.9 | 1910.0 | 1910.4 | 1908.4 | 1911.6 | 1911.6 | 1913.1 | 1913.0 | 1913.0 |
| gdb 3619 | 1905.9 <sup>a</sup> | 1913.5 | 1911.9 | 1912.7 | 1905.7 | 1906.3 | 1907.9 | 1909.8 | 1909.8 | 1910.8 | 1910.8 | 1910.8 |
| gdb 3620 | 1917.4 <sup>a</sup> | 1921.6 | 1924.7 | 1927.3 | 1921.5 | 1922.9 | 1925.2 | 1928.0 | 1928.0 | 1930.9 | 1930.9 | 1930.9 |
| gdb 3621 | 1905.2 <sup>a</sup> | 1913.8 | 1912.1 | 1913.1 | 1908.7 | 1908.7 | 1908.2 | 1910.4 | 1910.4 | 1911.8 | 1911.7 | 1911.7 |
| gdb 3622 | 1899.8 <sup>a</sup> | 1904.0 | 1899.9 | 1904.2 | 1905.1 | 1904.7 | 1900.8 | 1908.5 | 1908.5 | 1906.4 | 1906.4 | 1906.4 |
| gdb 3623 | 1872.0 <sup>a</sup> | 1884.8 | 1865.4 | 1877.2 | 1876.9 | 1875.1 | 1874.4 | 1875.6 | 1875.6 | 1871.7 | 1871.7 | 1871.7 |
| gdb 3624 | 1870.8 <sup>a</sup> | 1883.8 | 1862.9 | 1876.0 | 1881.0 | 1875.3 | 1871.7 | 1873.7 | 1873.7 | 1872.1 | 1872.1 | 1872.1 |
| gdb 3625 | 1875.8 <sup>a</sup> | 1896.0 | 1880.6 | 1889.5 | 1891.3 | 1886.2 | 1885.0 | 1884.3 | 1884.3 | 1885.3 | 1885.3 | 1885.3 |
| gdb 3626 | 1893.8 <sup>a</sup> | 1907.5 | 1901.9 | 1910.2 | 1899.6 | 1900.7 | 1903.5 | 1902.1 | 1902.1 | 1904.7 | 1904.7 | 1904.7 |
| gdb 3627 | 1890.9 <sup>a</sup> | 1888.6 | 1885.6 | 1889.5 | 1886.6 | 1887.8 | 1891.2 | 1893.2 | 1893.1 | 1889.7 | 1889.7 | 1889.7 |
| gdb 3628 | 1890.4 <sup>a</sup> | 1891.0 | 1887.5 | 1891.0 | 1895.7 | 1892.5 | 1894.1 | 1898.2 | 1898.1 | 1896.5 | 1896.5 | 1896.5 |
| gdb 3629 | 1895.6 <sup>a</sup> | 1901.3 | 1900.0 | 1899.7 | 1899.7 | 1896.9 | 1901.7 | 1900.6 | 1900.6 | 1902.5 | 1902.4 | 1902.4 |
| gdb 3630 | 1904.7 <sup>a</sup> | 1914.2 | 1914.7 | 1915.6 | 1911.0 | 1911.1 | 1908.5 | 1911.7 | 1911.6 | 1913.3 | 1913.3 | 1913.3 |
| gdb 3631 | 1899.6 <sup>a</sup> | 1903.9 | 1899.8 | 1904.6 | 1904.2 | 1904.2 | 1900.9 | 1908.3 | 1908.3 | 1906.2 | 1906.2 | 1906.2 |
| gdb 3632 | 1910.0 <sup>a</sup> | 1911.5 | 1913.4 | 1911.7 | 1916.5 | 1916.4 | 1910.4 | 1916.6 | 1916.6 | 1917.2 | 1917.2 | 1917.2 |
| gdb 3633 | 1902.8 <sup>a</sup> | 1900.0 | 1897.9 | 1902.2 | 1908.8 | 1908.1 | 1902.4 | 1912.3 | 1912.3 | 1909.9 | 1909.9 | 1909.9 |
| gdb 3634 | 1874.3 <sup>a</sup> | 1874.5 | 1865.0 | 1867.4 | 1876.8 | 1874.2 | 1871.3 | 1875.9 | 1875.8 | 1867.8 | 1867.7 | 1867.7 |
| gdb 3635 | 1878.6 <sup>a</sup> | 1884.6 | 1880.2 | 1878.2 | 1883.5 | 1881.1 | 1878.3 | 1878.8 | 1878.8 | 1874.6 | 1874.6 | 1874.6 |
| gdb 3636 | 1858.2 <sup>a</sup> | 1870.9 | 1860.7 | 1865.5 | 1864.3 | 1858.7 | 1853.3 | 1854.2 | 1854.2 | 1851.0 | 1850.9 | 1850.9 |
| gdb 3637 | 1860.6 <sup>a</sup> | 1883.3 | 1878.6 | 1877.8 | 1874.6 | 1868.6 | 1865.8 | 1862.5 | 1862.5 | 1862.9 | 1862.9 | 1862.9 |
| gdb 3638 | 1916.6 <sup>a</sup> | 1921.2 | 1924.1 | 1927.1 | 1919.9 | 1921.8 | 1924.9 | 1928.1 | 1928.1 | 1930.9 | 1930.9 | 1930.9 |
| gdb 3639 | 1872.3 <sup>a</sup> | 1880.8 | 1884.1 | 1880.8 | 1882.6 | 1878.0 | 1872.7 | 1880.2 | 1880.2 | 1876.5 | 1876.4 | 1876.4 |
| gdb 3640 | 1869.0 <sup>a</sup> | 1877.4 | 1876.6 | 1875.7 | 1878.5 | 1872.6 | 1868.0 | 1879.8 | 1879.7 | 1869.6 | 1869.6 | 1869.6 |
| gdb 3641 | 1876.2 <sup>a</sup> | 1889.9 | 1898.4 | 1890.5 | 1889.1 | 1884.5 | 1879.7 | 1882.0 | 1882.0 | 1881.9 | 1881.9 | 1881.9 |
| gdb 3642 | 1898.4 <sup>a</sup> | 1911.1 | 1902.0 | 1911.6 | 1906.6 | 1905.3 | 1905.5 | 1905.7 | 1905.7 | 1909.2 | 1909.1 | 1909.1 |
| gdb 3643 | 1913.6 <sup>a</sup> | 1908.9 | 1914.0 | 1912.2 | 1914.8 | 1912.2 | 1910.0 | 1910.7 | 1910.3 | 1907.6 | 1907.6 | 1907.6 |
| gdb 3644 | 1896.1 <sup>a</sup> | 1899.4 | 1899.2 | 1900.6 | 1902.9 | 1901.9 | 1900.8 | 1904.3 | 1904.2 | 1903.1 | 1903.1 | 1903.1 |

... continued on next page ...

Table S26: ... continued from previous page. ...

| Molecule | Ref.                | MNDO   | AMI    | PM3    | PM6    | PM7    | OM1    |        | OM2    |        | OM3    |        | D3T    |
|----------|---------------------|--------|--------|--------|--------|--------|--------|--------|--------|--------|--------|--------|--------|
|          |                     |        |        |        |        |        | D2     | D3     | D2     | D3     | D2     | D3     |        |
| gdb 3645 | 1901.1 <sup>a</sup> | 1908.6 | 1912.4 | 1910.4 | 1906.7 | 1906.4 | 1906.4 | 1905.7 | 1905.6 | 1905.7 | 1908.0 | 1908.0 | 1908.0 |
| gdb 3646 | 1898.2 <sup>a</sup> | 1901.9 | 1904.0 | 1901.4 | 1902.3 | 1903.2 | 1902.0 | 1903.8 | 1903.8 | 1903.8 | 1901.9 | 1901.8 | 1901.8 |
| gdb 3647 | 1904.3 <sup>a</sup> | 1911.2 | 1918.4 | 1912.7 | 1909.8 | 1909.6 | 1907.8 | 1907.2 | 1907.2 | 1907.2 | 1909.2 | 1909.1 | 1909.1 |
| gdb 3648 | 1848.1 <sup>a</sup> | 1871.5 | 1866.6 | 1866.0 | 1867.2 | 1860.4 | 1853.3 | 1853.6 | 1853.6 | 1853.6 | 1850.9 | 1850.8 | 1850.8 |
| gdb 3649 | 1891.8 <sup>a</sup> | 1891.9 | 1884.3 | 1895.1 | 1889.6 | 1891.6 | 1894.2 | 1899.7 | 1899.7 | 1899.7 | 1901.0 | 1901.0 | 1901.0 |
| gdb 3650 | 1844.0 <sup>a</sup> | 1851.4 | 1848.1 | 1851.3 | 1853.7 | 1848.2 | 1839.4 | 1841.9 | 1841.9 | 1841.9 | 1840.8 | 1840.7 | 1840.7 |
| gdb 3651 | 1853.8 <sup>a</sup> | 1865.3 | 1860.9 | 1863.0 | 1860.3 | 1854.4 | 1853.2 | 1849.8 | 1849.8 | 1849.8 | 1853.3 | 1853.2 | 1853.3 |
| gdb 3652 | 1899.4 <sup>a</sup> | 1894.9 | 1888.8 | 1898.9 | 1900.3 | 1899.7 | 1900.0 | 1907.8 | 1907.8 | 1907.8 | 1908.8 | 1908.8 | 1908.8 |
| gdb 3653 | 1870.9 <sup>a</sup> | 1867.5 | 1856.0 | 1862.5 | 1866.7 | 1865.8 | 1868.6 | 1869.6 | 1869.6 | 1869.6 | 1865.8 | 1865.8 | 1865.8 |
| gdb 3654 | 1872.0 <sup>a</sup> | 1869.2 | 1854.2 | 1863.4 | 1867.5 | 1868.1 | 1870.8 | 1871.8 | 1871.8 | 1871.8 | 1867.9 | 1867.9 | 1867.9 |
| gdb 3655 | 1872.4 <sup>a</sup> | 1877.5 | 1869.0 | 1874.9 | 1879.3 | 1875.6 | 1875.6 | 1874.7 | 1874.7 | 1874.7 | 1876.9 | 1876.9 | 1876.9 |
| gdb 3656 | 1892.4 <sup>a</sup> | 1891.6 | 1889.6 | 1896.4 | 1891.2 | 1892.1 | 1896.6 | 1897.2 | 1897.1 | 1897.1 | 1899.7 | 1899.6 | 1899.7 |
| gdb 3657 | 1881.7 <sup>a</sup> | 1898.0 | 1878.9 | 1891.8 | 1897.4 | 1888.6 | 1883.6 | 1884.4 | 1884.4 | 1884.4 | 1887.7 | 1887.7 | 1887.7 |
| gdb 3658 | 1900.1 <sup>a</sup> | 1895.2 | 1870.3 | 1887.1 | 1898.3 | 1888.1 | 1882.3 | 1885.4 | 1885.4 | 1885.4 | 1884.5 | 1884.4 | 1884.5 |
| gdb 3659 | 1885.1 <sup>a</sup> | 1900.4 | 1878.2 | 1890.4 | 1896.6 | 1888.5 | 1886.2 | 1887.7 | 1887.7 | 1887.7 | 1890.0 | 1890.0 | 1890.0 |
| gdb 3660 | 1880.9 <sup>a</sup> | 1888.6 | 1864.5 | 1880.9 | 1884.5 | 1880.7 | 1876.5 | 1881.9 | 1881.9 | 1881.9 | 1878.5 | 1878.5 | 1878.5 |
| gdb 3661 | 1832.5 <sup>a</sup> | 1831.0 | 1791.6 | 1814.7 | 1836.5 | 1818.0 | 1812.2 | 1818.5 | 1818.5 | 1818.5 | 1819.1 | 1819.1 | 1819.1 |
| gdb 3662 | 1835.8 <sup>a</sup> | 1821.4 | 1778.6 | 1805.2 | 1825.9 | 1811.8 | 1805.8 | 1817.5 | 1817.4 | 1817.4 | 1810.7 | 1810.7 | 1810.7 |
| gdb 3663 | 1848.8 <sup>a</sup> | 1838.8 | 1793.6 | 1818.0 | 1830.0 | 1817.4 | 1818.3 | 1822.9 | 1822.9 | 1822.9 | 1821.3 | 1821.3 | 1821.3 |
| gdb 3664 | 1844.1 <sup>a</sup> | 1848.0 | 1806.5 | 1827.2 | 1840.4 | 1823.1 | 1823.3 | 1823.7 | 1823.7 | 1823.7 | 1828.4 | 1828.3 | 1828.3 |
| gdb 3665 | 1823.7 <sup>a</sup> | 1825.6 | 1791.7 | 1811.0 | 1831.9 | 1813.9 | 1810.1 | 1813.7 | 1813.7 | 1813.7 | 1814.1 | 1814.1 | 1814.1 |
| gdb 3666 | 1830.3 <sup>a</sup> | 1828.5 | 1795.3 | 1814.7 | 1834.0 | 1816.8 | 1812.1 | 1818.7 | 1818.7 | 1818.7 | 1817.0 | 1817.0 | 1817.0 |
| gdb 3667 | 1842.3 <sup>a</sup> | 1832.8 | 1795.4 | 1817.6 | 1831.0 | 1818.9 | 1817.3 | 1819.5 | 1819.5 | 1819.5 | 1818.2 | 1818.2 | 1818.2 |
| gdb 3668 | 1827.9 <sup>a</sup> | 1816.6 | 1777.8 | 1801.6 | 1819.2 | 1806.6 | 1802.2 | 1810.5 | 1810.5 | 1810.5 | 1804.1 | 1804.0 | 1804.0 |
| gdb 3669 | 1840.0 <sup>a</sup> | 1844.0 | 1807.3 | 1827.4 | 1842.2 | 1823.3 | 1824.2 | 1822.0 | 1822.0 | 1822.0 | 1826.7 | 1826.7 | 1826.7 |
| gdb 3670 | 1859.1 <sup>a</sup> | 1853.1 | 1828.0 | 1843.0 | 1856.1 | 1848.3 | 1841.3 | 1850.1 | 1850.1 | 1850.1 | 1843.5 | 1843.5 | 1843.5 |
| gdb 3671 | 1860.5 <sup>a</sup> | 1855.1 | 1827.5 | 1844.2 | 1855.4 | 1848.8 | 1842.9 | 1851.4 | 1851.4 | 1851.4 | 1843.4 | 1843.4 | 1843.4 |
| gdb 3672 | 1859.3 <sup>a</sup> | 1863.8 | 1841.1 | 1852.6 | 1866.5 | 1854.2 | 1849.0 | 1852.9 | 1852.9 | 1852.9 | 1853.0 | 1853.0 | 1853.0 |
| gdb 3673 | 1860.5 <sup>a</sup> | 1864.8 | 1840.8 | 1853.9 | 1867.6 | 1855.7 | 1850.9 | 1854.6 | 1854.6 | 1854.6 | 1853.4 | 1853.4 | 1853.4 |
| gdb 3674 | 1849.4 <sup>a</sup> | 1855.8 | 1830.0 | 1844.5 | 1855.0 | 1846.7 | 1841.0 | 1841.4 | 1841.4 | 1841.4 | 1839.0 | 1839.0 | 1839.0 |
| gdb 3675 | 1850.6 <sup>a</sup> | 1857.6 | 1831.9 | 1845.8 | 1856.7 | 1848.6 | 1842.7 | 1845.4 | 1845.4 | 1845.4 | 1841.4 | 1841.4 | 1841.4 |
| gdb 3676 | 1856.5 <sup>a</sup> | 1861.4 | 1832.3 | 1846.5 | 1855.8 | 1848.8 | 1846.4 | 1847.7 | 1847.6 | 1847.6 | 1843.7 | 1843.7 | 1843.7 |
| gdb 3677 | 1849.9 <sup>a</sup> | 1845.9 | 1816.2 | 1834.6 | 1843.4 | 1839.9 | 1833.8 | 1839.0 | 1839.0 | 1839.0 | 1830.0 | 1830.0 | 1830.0 |
| gdb 3678 | 1855.0 <sup>a</sup> | 1871.0 | 1849.9 | 1858.8 | 1871.4 | 1860.0 | 1852.3 | 1850.4 | 1850.4 | 1850.4 | 1852.9 | 1852.9 | 1852.9 |
| gdb 3679 | 1882.5 <sup>a</sup> | 1887.3 | 1873.9 | 1878.6 | 1880.3 | 1880.0 | 1876.8 | 1878.8 | 1878.7 | 1878.8 | 1874.3 | 1874.3 | 1874.3 |
| gdb 3680 | 1885.1 <sup>a</sup> | 1897.2 | 1888.8 | 1893.3 | 1893.9 | 1888.9 | 1887.3 | 1885.3 | 1885.3 | 1885.3 | 1886.8 | 1886.8 | 1886.8 |
| gdb 3681 | 1880.0 <sup>a</sup> | 1898.8 | 1878.6 | 1891.7 | 1897.2 | 1888.5 | 1882.2 | 1883.0 | 1883.0 | 1883.0 | 1886.7 | 1886.7 | 1886.7 |
| gdb 3682 | 1880.6 <sup>a</sup> | 1899.8 | 1878.7 | 1891.5 | 1895.3 | 1887.2 | 1882.1 | 1884.5 | 1884.5 | 1884.5 | 1886.9 | 1886.9 | 1886.9 |
| gdb 3683 | 1896.0 <sup>a</sup> | 1893.8 | 1866.9 | 1885.7 | 1894.5 | 1885.8 | 1877.7 | 1879.6 | 1879.6 | 1879.6 | 1880.3 | 1880.3 | 1880.3 |
| gdb 3684 | 1881.5 <sup>a</sup> | 1889.5 | 1865.3 | 1882.2 | 1887.5 | 1883.0 | 1876.4 | 1881.6 | 1881.6 | 1881.6 | 1879.1 | 1879.1 | 1879.1 |
| gdb 3685 | 1882.4 <sup>a</sup> | 1901.5 | 1878.3 | 1890.1 | 1893.0 | 1885.9 | 1885.5 | 1886.0 | 1886.0 | 1886.0 | 1888.0 | 1888.0 | 1888.0 |
| gdb 3686 | 1877.8 <sup>a</sup> | 1887.1 | 1860.0 | 1877.1 | 1882.7 | 1875.9 | 1869.8 | 1873.7 | 1873.7 | 1873.7 | 1874.6 | 1874.6 | 1874.6 |
| gdb 3687 | 1882.2 <sup>a</sup> | 1901.3 | 1877.0 | 1891.9 | 1896.2 | 1888.2 | 1884.8 | 1884.6 | 1884.6 | 1884.6 | 1887.7 | 1887.7 | 1887.7 |
| gdb 3688 | 1879.9 <sup>a</sup> | 1889.8 | 1864.6 | 1880.8 | 1883.4 | 1880.1 | 1877.0 | 1881.8 | 1881.7 | 1881.8 | 1878.3 | 1878.3 | 1878.3 |
| gdb 3689 | 1885.6 <sup>a</sup> | 1888.3 | 1878.6 | 1882.9 | 1888.6 | 1886.4 | 1879.0 | 1883.3 | 1883.3 | 1883.3 | 1879.1 | 1879.1 | 1879.1 |

... continued on next page ...

Table S26: ... continued from previous page. ...

| Molecule | Ref.                | MNDO   | AMI    | PM3    | PM6    | PM7    | OM1    | OM2    |        | OM3    |        | D3T    |
|----------|---------------------|--------|--------|--------|--------|--------|--------|--------|--------|--------|--------|--------|
|          |                     |        |        |        |        |        |        | D2     | D3     | D2     | D3     |        |
| gdb 3690 | 1878.1 <sup>a</sup> | 1887.8 | 1875.5 | 1880.5 | 1889.2 | 1883.7 | 1874.5 | 1876.6 | 1876.6 | 1876.6 | 1876.8 | 1876.7 |
| gdb 3691 | 1882.7 <sup>a</sup> | 1897.7 | 1889.5 | 1890.3 | 1894.2 | 1888.2 | 1884.6 | 1882.8 | 1882.8 | 1882.8 | 1884.7 | 1884.7 |
| gdb 3692 | 1868.2 <sup>a</sup> | 1885.1 | 1861.2 | 1875.7 | 1877.8 | 1873.0 | 1866.9 | 1865.7 | 1865.7 | 1865.7 | 1866.6 | 1866.6 |
| gdb 3693 | 1875.4 <sup>a</sup> | 1887.8 | 1867.4 | 1880.5 | 1879.7 | 1878.0 | 1875.6 | 1876.0 | 1876.0 | 1876.0 | 1872.8 | 1872.7 |
| gdb 3694 | 1872.1 <sup>a</sup> | 1897.3 | 1880.3 | 1889.8 | 1888.8 | 1882.9 | 1881.2 | 1876.9 | 1876.9 | 1876.9 | 1880.3 | 1880.2 |
| gdb 3695 | 1848.4 <sup>a</sup> | 1857.5 | 1825.1 | 1843.1 | 1857.6 | 1845.8 | 1829.7 | 1830.0 | 1830.0 | 1830.0 | 1833.2 | 1833.2 |
| gdb 3696 | 1852.2 <sup>a</sup> | 1860.9 | 1830.6 | 1847.3 | 1858.8 | 1849.9 | 1841.3 | 1843.3 | 1843.3 | 1843.3 | 1841.2 | 1841.2 |
| gdb 3697 | 1853.7 <sup>a</sup> | 1850.5 | 1816.6 | 1837.3 | 1847.2 | 1842.9 | 1833.8 | 1840.3 | 1840.3 | 1840.3 | 1832.0 | 1832.0 |
| gdb 3698 | 1857.1 <sup>a</sup> | 1863.7 | 1830.9 | 1848.0 | 1857.2 | 1848.9 | 1842.5 | 1844.7 | 1844.7 | 1844.7 | 1843.1 | 1843.1 |
| gdb 3699 | 1853.7 <sup>a</sup> | 1872.7 | 1844.1 | 1857.3 | 1867.0 | 1854.6 | 1847.3 | 1845.2 | 1845.2 | 1845.2 | 1849.8 | 1849.8 |
| gdb 3700 | 1853.4 <sup>a</sup> | 1865.1 | 1831.6 | 1848.9 | 1857.8 | 1852.7 | 1845.8 | 1848.7 | 1848.7 | 1848.7 | 1839.9 | 1839.9 |
| gdb 3701 | 1848.2 <sup>a</sup> | 1871.5 | 1836.9 | 1854.0 | 1865.9 | 1854.4 | 1841.8 | 1838.1 | 1838.1 | 1838.1 | 1840.9 | 1840.9 |
| gdb 3702 | 1849.4 <sup>a</sup> | 1874.2 | 1844.6 | 1858.1 | 1866.9 | 1857.6 | 1851.3 | 1849.7 | 1849.7 | 1849.7 | 1847.1 | 1847.1 |
| gdb 3703 | 1844.2 <sup>a</sup> | 1855.6 | 1826.4 | 1841.9 | 1854.4 | 1842.7 | 1829.7 | 1827.1 | 1827.1 | 1827.1 | 1830.0 | 1830.0 |
| gdb 3704 | 1842.9 <sup>a</sup> | 1855.4 | 1823.2 | 1839.5 | 1851.6 | 1840.5 | 1829.6 | 1826.9 | 1826.9 | 1826.9 | 1829.3 | 1829.3 |
| gdb 3705 | 1851.8 <sup>a</sup> | 1861.7 | 1834.3 | 1848.8 | 1858.2 | 1850.1 | 1843.5 | 1842.7 | 1842.7 | 1842.7 | 1840.6 | 1840.6 |
| gdb 3706 | 1849.4 <sup>a</sup> | 1871.1 | 1847.6 | 1858.2 | 1868.1 | 1855.8 | 1849.0 | 1843.8 | 1843.8 | 1843.8 | 1848.0 | 1848.0 |
| gdb 3707 | 1845.3 <sup>a</sup> | 1856.2 | 1825.1 | 1842.8 | 1856.0 | 1843.8 | 1829.3 | 1830.1 | 1830.1 | 1830.1 | 1832.6 | 1832.6 |
| gdb 3708 | 1851.6 <sup>a</sup> | 1859.3 | 1828.3 | 1846.8 | 1856.1 | 1850.0 | 1840.7 | 1842.8 | 1842.8 | 1842.8 | 1840.6 | 1840.6 |
| gdb 3709 | 1846.3 <sup>a</sup> | 1857.4 | 1822.6 | 1841.4 | 1852.0 | 1840.7 | 1829.1 | 1830.2 | 1830.2 | 1830.2 | 1832.7 | 1832.7 |
| gdb 3710 | 1857.2 <sup>a</sup> | 1863.5 | 1830.5 | 1847.3 | 1855.6 | 1847.8 | 1843.4 | 1845.6 | 1845.6 | 1845.6 | 1843.5 | 1843.5 |
| gdb 3711 | 1854.6 <sup>a</sup> | 1850.0 | 1816.2 | 1837.0 | 1846.8 | 1842.9 | 1834.3 | 1841.0 | 1841.0 | 1841.0 | 1832.5 | 1832.5 |
| gdb 3712 | 1855.1 <sup>a</sup> | 1873.1 | 1843.7 | 1854.8 | 1866.9 | 1852.2 | 1848.7 | 1846.2 | 1846.2 | 1846.2 | 1850.8 | 1850.8 |
| gdb 3713 | 1864.5 <sup>a</sup> | 1853.6 | 1829.3 | 1845.5 | 1858.2 | 1851.4 | 1844.1 | 1853.4 | 1853.4 | 1853.4 | 1845.8 | 1845.8 |
| gdb 3714 | 1863.4 <sup>a</sup> | 1863.1 | 1843.0 | 1855.4 | 1869.2 | 1857.5 | 1851.2 | 1856.0 | 1856.0 | 1856.0 | 1854.8 | 1854.8 |
| gdb 3715 | 1861.9 <sup>a</sup> | 1861.6 | 1840.9 | 1853.4 | 1866.9 | 1856.4 | 1846.9 | 1851.6 | 1851.6 | 1851.6 | 1852.6 | 1852.6 |
| gdb 3716 | 1875.8 <sup>a</sup> | 1870.5 | 1854.9 | 1863.2 | 1871.8 | 1870.0 | 1866.9 | 1870.1 | 1870.1 | 1870.1 | 1861.5 | 1861.5 |
| gdb 3717 | 1865.6 <sup>a</sup> | 1880.6 | 1865.0 | 1870.7 | 1881.2 | 1872.5 | 1865.7 | 1864.3 | 1864.3 | 1864.3 | 1866.0 | 1866.0 |
| gdb 3718 | 1873.6 <sup>a</sup> | 1878.9 | 1867.3 | 1872.0 | 1878.9 | 1872.9 | 1871.4 | 1870.3 | 1870.3 | 1870.3 | 1867.9 | 1867.9 |
| gdb 3719 | 1846.4 <sup>a</sup> | 1866.1 | 1831.2 | 1849.2 | 1860.2 | 1849.0 | 1833.2 | 1835.2 | 1835.2 | 1835.2 | 1831.9 | 1831.9 |
| gdb 3720 | 1851.6 <sup>a</sup> | 1870.5 | 1837.2 | 1853.9 | 1863.3 | 1854.8 | 1843.2 | 1845.3 | 1845.3 | 1845.3 | 1838.2 | 1838.2 |
| gdb 3721 | 1852.8 <sup>a</sup> | 1870.0 | 1837.7 | 1854.2 | 1864.4 | 1855.7 | 1842.9 | 1845.2 | 1845.2 | 1845.2 | 1838.3 | 1838.3 |
| gdb 3722 | 1850.0 <sup>a</sup> | 1879.7 | 1850.5 | 1863.7 | 1873.2 | 1860.7 | 1849.3 | 1846.7 | 1846.7 | 1846.7 | 1846.1 | 1846.1 |
| gdb 3723 | 1850.5 <sup>a</sup> | 1879.4 | 1850.9 | 1863.8 | 1874.1 | 1861.3 | 1849.0 | 1846.7 | 1846.7 | 1846.7 | 1846.2 | 1846.2 |
| gdb 3724 | 1851.0 <sup>a</sup> | 1879.5 | 1848.0 | 1863.1 | 1872.3 | 1861.0 | 1846.9 | 1844.0 | 1843.9 | 1843.9 | 1844.7 | 1844.7 |
| gdb 3725 | 1886.5 <sup>a</sup> | 1889.3 | 1879.3 | 1883.1 | 1888.0 | 1886.3 | 1881.0 | 1885.1 | 1885.1 | 1885.1 | 1880.5 | 1880.5 |
| gdb 3726 | 1884.3 <sup>a</sup> | 1896.9 | 1891.9 | 1892.8 | 1897.7 | 1891.6 | 1887.0 | 1886.7 | 1886.7 | 1886.7 | 1888.5 | 1888.5 |
| gdb 3727 | 1891.1 <sup>a</sup> | 1902.2 | 1890.7 | 1897.8 | 1903.4 | 1899.3 | 1893.0 | 1897.4 | 1897.4 | 1897.4 | 1898.7 | 1898.7 |
| gdb 3728 | 1910.1 <sup>a</sup> | 1912.0 | 1899.6 | 1908.8 | 1914.1 | 1908.5 | 1905.3 | 1907.4 | 1907.4 | 1907.4 | 1907.5 | 1907.5 |
| gdb 3729 | 1908.9 <sup>a</sup> | 1912.1 | 1903.9 | 1910.9 | 1916.1 | 1908.7 | 1904.9 | 1908.6 | 1908.6 | 1908.6 | 1907.2 | 1907.2 |
| gdb 3730 | 1900.0 <sup>a</sup> | 1902.9 | 1893.7 | 1900.7 | 1905.7 | 1904.4 | 1899.9 | 1904.6 | 1904.6 | 1904.6 | 1902.4 | 1902.4 |
| gdb 3731 | 1898.0 <sup>a</sup> | 1911.8 | 1906.6 | 1910.1 | 1913.5 | 1907.9 | 1904.9 | 1905.2 | 1905.2 | 1905.2 | 1909.2 | 1909.2 |
| gdb 3732 | 1877.7 <sup>a</sup> | 1894.3 | 1879.7 | 1884.6 | 1891.4 | 1885.3 | 1874.3 | 1876.6 | 1876.6 | 1876.6 | 1877.1 | 1877.1 |
| gdb 3733 | 1845.9 <sup>a</sup> | 1861.1 | 1825.2 | 1842.4 | 1851.6 | 1844.1 | 1834.3 | 1836.2 | 1836.2 | 1836.2 | 1830.3 | 1830.3 |
| gdb 3734 | 1855.0 <sup>a</sup> | 1864.8 | 1830.5 | 1847.7 | 1855.4 | 1851.5 | 1846.2 | 1849.2 | 1849.2 | 1849.2 | 1839.6 | 1839.6 |

... continued on next page ...

Table S26: . . . continued from previous page. . . .

| Molecule | Ref.                | MNDO   | AMI    | PM3    | PM6    | PM7    | OM1    |        | OM2    |        | OM3    |        | D3T    |
|----------|---------------------|--------|--------|--------|--------|--------|--------|--------|--------|--------|--------|--------|--------|
|          |                     |        |        |        |        |        | OM1    | OM2    | D2     | D3     | D3T    | D2     |        |
| gdb 3735 | 1849.0 <sup>a</sup> | 1861.5 | 1825.3 | 1843.8 | 1854.6 | 1847.1 | 1836.7 | 1839.2 | 1839.2 | 1839.2 | 1833.4 | 1833.3 | 1833.3 |
| gdb 3736 | 1853.0 <sup>a</sup> | 1874.3 | 1844.3 | 1857.0 | 1867.0 | 1859.1 | 1852.4 | 1850.9 | 1850.9 | 1850.9 | 1847.7 | 1847.7 | 1847.7 |
| gdb 3737 | 1846.6 <sup>a</sup> | 1871.6 | 1837.3 | 1853.8 | 1864.0 | 1852.3 | 1843.1 | 1840.3 | 1840.3 | 1840.3 | 1841.3 | 1841.2 | 1841.2 |
| gdb 3738 | 1846.5 <sup>a</sup> | 1871.9 | 1839.9 | 1854.0 | 1865.7 | 1853.6 | 1842.4 | 1840.1 | 1840.1 | 1840.1 | 1840.9 | 1840.8 | 1840.8 |
| gdb 3739 | 1867.0 <sup>a</sup> | 1885.7 | 1864.4 | 1876.0 | 1878.9 | 1872.7 | 1868.5 | 1868.5 | 1868.5 | 1868.5 | 1867.4 | 1867.4 | 1867.4 |
| gdb 3740 | 1867.6 <sup>a</sup> | 1884.0 | 1861.4 | 1874.7 | 1876.9 | 1871.3 | 1865.4 | 1863.9 | 1863.9 | 1863.9 | 1864.9 | 1864.8 | 1864.8 |
| gdb 3741 | 1874.0 <sup>a</sup> | 1887.5 | 1866.6 | 1879.6 | 1888.7 | 1883.0 | 1875.9 | 1876.1 | 1876.1 | 1876.1 | 1872.6 | 1872.6 | 1872.6 |
| gdb 3742 | 1872.0 <sup>a</sup> | 1896.5 | 1879.4 | 1888.9 | 1898.7 | 1893.0 | 1881.4 | 1877.7 | 1877.7 | 1877.7 | 1880.6 | 1880.5 | 1880.5 |
| gdb 3743 | 1865.9 <sup>a</sup> | 1868.0 | 1849.4 | 1857.4 | 1866.1 | 1862.4 | 1856.7 | 1859.8 | 1859.8 | 1859.8 | 1854.4 | 1854.4 | 1854.4 |
| gdb 3744 | 1875.3 <sup>a</sup> | 1870.5 | 1852.9 | 1861.2 | 1868.3 | 1867.3 | 1864.8 | 1867.2 | 1867.2 | 1867.2 | 1858.4 | 1858.4 | 1858.4 |
| gdb 3745 | 1865.9 <sup>a</sup> | 1870.2 | 1853.1 | 1860.8 | 1871.8 | 1866.4 | 1859.1 | 1863.2 | 1863.2 | 1863.2 | 1857.2 | 1857.2 | 1857.2 |
| gdb 3746 | 1873.8 <sup>a</sup> | 1879.6 | 1865.7 | 1870.5 | 1876.9 | 1871.6 | 1870.6 | 1868.7 | 1868.7 | 1868.7 | 1866.3 | 1866.2 | 1866.2 |
| gdb 3747 | 1864.4 <sup>a</sup> | 1879.6 | 1866.9 | 1870.9 | 1881.7 | 1871.7 | 1865.3 | 1865.1 | 1865.1 | 1865.1 | 1865.3 | 1865.3 | 1865.3 |
| gdb 3748 | 1869.0 <sup>a</sup> | 1881.4 | 1866.6 | 1870.3 | 1881.5 | 1872.7 | 1866.9 | 1865.9 | 1865.9 | 1865.9 | 1866.8 | 1866.8 | 1866.8 |
| gdb 3749 | 1878.2 <sup>a</sup> | 1892.3 | 1879.0 | 1884.2 | 1890.9 | 1885.1 | 1873.9 | 1876.8 | 1876.8 | 1876.8 | 1877.2 | 1877.1 | 1877.1 |
| gdb 3750 | 1877.6 <sup>a</sup> | 1892.4 | 1885.4 | 1883.7 | 1891.4 | 1886.1 | 1876.3 | 1874.3 | 1874.3 | 1874.3 | 1874.7 | 1874.7 | 1874.7 |
| gdb 3751 | 1911.8 <sup>a</sup> | 1912.3 | 1902.9 | 1909.4 | 1914.2 | 1907.6 | 1905.9 | 1909.2 | 1909.2 | 1909.2 | 1907.3 | 1907.3 | 1907.3 |
| gdb 3752 | 1892.1 <sup>a</sup> | 1902.7 | 1894.0 | 1897.0 | 1903.2 | 1898.1 | 1894.5 | 1900.3 | 1900.3 | 1900.3 | 1899.4 | 1899.4 | 1899.4 |
| gdb 3753 | 1894.0 <sup>a</sup> | 1902.8 | 1890.1 | 1896.6 | 1901.5 | 1898.1 | 1894.6 | 1898.2 | 1898.2 | 1898.2 | 1899.2 | 1899.2 | 1899.2 |
| gdb 3754 | 1896.6 <sup>a</sup> | 1901.9 | 1890.2 | 1896.5 | 1898.6 | 1898.9 | 1897.7 | 1901.6 | 1901.6 | 1901.6 | 1898.5 | 1898.5 | 1898.5 |
| gdb 3755 | 1902.6 <sup>a</sup> | 1913.3 | 1907.4 | 1908.6 | 1913.3 | 1910.0 | 1905.2 | 1906.8 | 1906.8 | 1906.8 | 1909.2 | 1909.2 | 1909.2 |
| gdb 3756 | 1877.4 <sup>a</sup> | 1881.0 | 1873.7 | 1874.4 | 1881.1 | 1879.0 | 1868.3 | 1872.4 | 1872.4 | 1872.4 | 1864.9 | 1864.9 | 1864.9 |
| gdb 3757 | 1878.0 <sup>a</sup> | 1892.4 | 1887.1 | 1884.6 | 1891.4 | 1884.4 | 1876.4 | 1875.6 | 1875.6 | 1875.6 | 1874.6 | 1874.6 | 1874.6 |
| gdb 3758 | 1878.6 <sup>a</sup> | 1892.7 | 1885.9 | 1889.6 | 1891.8 | 1886.7 | 1875.0 | 1873.6 | 1873.6 | 1873.6 | 1873.9 | 1873.9 | 1873.9 |
| gdb 3759 | 1900.7 <sup>a</sup> | 1898.4 | 1889.0 | 1899.2 | 1900.0 | 1900.8 | 1902.7 | 1908.8 | 1908.8 | 1908.8 | 1910.4 | 1910.3 | 1910.3 |
| gdb 3760 | 1874.5 <sup>a</sup> | 1872.2 | 1858.2 | 1864.1 | 1871.8 | 1871.0 | 1873.7 | 1876.4 | 1876.4 | 1876.4 | 1872.0 | 1872.0 | 1872.0 |
| gdb 3761 | 1877.2 <sup>a</sup> | 1872.7 | 1858.0 | 1864.9 | 1873.8 | 1873.2 | 1876.1 | 1879.0 | 1879.0 | 1879.0 | 1874.6 | 1874.6 | 1874.6 |
| gdb 3762 | 1880.2 <sup>a</sup> | 1882.9 | 1872.0 | 1876.1 | 1886.2 | 1881.6 | 1885.5 | 1884.3 | 1884.3 | 1884.3 | 1886.2 | 1886.2 | 1886.2 |
| gdb 3763 | 1896.2 <sup>a</sup> | 1897.1 | 1893.4 | 1898.6 | 1900.7 | 1900.5 | 1903.1 | 1904.8 | 1904.8 | 1904.8 | 1907.6 | 1907.5 | 1907.5 |
| gdb 3764 | 1854.2 <sup>a</sup> | 1858.2 | 1856.9 | 1859.8 | 1863.2 | 1857.9 | 1854.5 | 1859.4 | 1859.4 | 1859.3 | 1858.9 | 1858.8 | 1858.6 |
| gdb 3765 | 1855.2 <sup>a</sup> | 1849.5 | 1844.5 | 1849.2 | 1852.1 | 1850.7 | 1847.9 | 1857.1 | 1857.1 | 1857.1 | 1850.1 | 1850.1 | 1850.1 |
| gdb 3766 | 1887.5 <sup>a</sup> | 1892.4 | 1889.3 | 1895.5 | 1889.6 | 1891.2 | 1898.0 | 1895.0 | 1895.0 | 1895.0 | 1897.7 | 1897.6 | 1897.6 |
| gdb 3767 | 1870.8 <sup>a</sup> | 1869.6 | 1855.0 | 1863.4 | 1865.3 | 1865.8 | 1868.6 | 1869.0 | 1869.0 | 1869.0 | 1865.4 | 1865.3 | 1865.3 |
| gdb 3768 | 1875.5 <sup>a</sup> | 1869.4 | 1856.8 | 1864.5 | 1868.7 | 1868.6 | 1871.7 | 1872.6 | 1872.6 | 1872.6 | 1869.1 | 1869.1 | 1869.1 |
| gdb 3769 | 1873.3 <sup>a</sup> | 1878.3 | 1866.7 | 1874.7 | 1877.7 | 1872.5 | 1875.9 | 1873.5 | 1873.5 | 1873.5 | 1875.8 | 1875.8 | 1875.8 |
| gdb 3770 | 1833.3 <sup>a</sup> | 1818.6 | 1784.0 | 1803.8 | 1824.1 | 1811.6 | 1807.6 | 1815.4 | 1815.4 | 1815.4 | 1808.7 | 1808.7 | 1808.7 |
| gdb 3771 | 1835.2 <sup>a</sup> | 1829.4 | 1796.3 | 1812.7 | 1834.7 | 1818.5 | 1815.4 | 1819.2 | 1819.2 | 1819.2 | 1818.8 | 1818.8 | 1818.8 |
| gdb 3772 | 1845.7 <sup>a</sup> | 1846.6 | 1817.8 | 1831.6 | 1846.0 | 1838.2 | 1828.0 | 1829.2 | 1829.2 | 1829.2 | 1824.5 | 1824.4 | 1824.5 |
| gdb 3773 | 1847.3 <sup>a</sup> | 1847.3 | 1819.9 | 1832.2 | 1846.8 | 1838.3 | 1827.1 | 1827.5 | 1827.5 | 1827.5 | 1822.8 | 1822.8 | 1822.8 |
| gdb 3774 | 1851.4 <sup>a</sup> | 1849.3 | 1821.0 | 1835.3 | 1846.2 | 1843.0 | 1836.8 | 1839.6 | 1839.6 | 1839.6 | 1830.5 | 1830.5 | 1830.5 |
| gdb 3775 | 1844.1 <sup>a</sup> | 1855.6 | 1831.2 | 1841.6 | 1857.7 | 1846.1 | 1835.3 | 1832.3 | 1832.3 | 1832.3 | 1834.0 | 1834.0 | 1834.0 |
| gdb 3776 | 1843.7 <sup>a</sup> | 1857.3 | 1831.4 | 1840.9 | 1854.9 | 1843.4 | 1833.6 | 1830.3 | 1830.3 | 1830.3 | 1831.9 | 1831.9 | 1831.9 |
| gdb 3777 | 1852.4 <sup>a</sup> | 1859.6 | 1833.0 | 1844.0 | 1858.0 | 1850.8 | 1844.7 | 1843.7 | 1843.7 | 1843.7 | 1841.1 | 1841.1 | 1841.1 |
| gdb 3778 | 1873.9 <sup>a</sup> | 1883.5 | 1871.0 | 1872.6 | 1879.4 | 1876.5 | 1870.5 | 1873.7 | 1873.7 | 1873.7 | 1866.9 | 1866.9 | 1866.9 |
| gdb 3779 | 1874.3 <sup>a</sup> | 1893.6 | 1884.2 | 1883.1 | 1890.2 | 1883.3 | 1877.0 | 1876.9 | 1876.9 | 1876.9 | 1876.2 | 1876.2 | 1876.2 |

. . . continued on next page . . .

Table S26: ... continued from previous page. ...

| Molecule | Ref.                | MNDO   | AMI    | PM3    | PM6    | PM7    | OM1    | OM2    |        | OM3    |        | D3T    |
|----------|---------------------|--------|--------|--------|--------|--------|--------|--------|--------|--------|--------|--------|
|          |                     |        |        |        |        |        |        | D2     | D3     | D2     | D3     |        |
| gdb 3780 | 1830.4 <sup>a</sup> | 1815.9 | 1786.4 | 1802.5 | 1823.5 | 1811.0 | 1808.5 | 1813.2 | 1813.2 | 1807.0 | 1807.0 | 1807.0 |
| gdb 3781 | 1828.4 <sup>a</sup> | 1824.9 | 1798.9 | 1812.3 | 1833.3 | 1817.1 | 1814.8 | 1815.3 | 1815.3 | 1815.3 | 1815.3 | 1815.3 |
| gdb 3782 | 1841.9 <sup>a</sup> | 1844.1 | 1820.5 | 1831.5 | 1845.4 | 1837.0 | 1827.7 | 1826.0 | 1826.0 | 1821.6 | 1821.6 | 1821.6 |
| gdb 3783 | 1841.5 <sup>a</sup> | 1854.5 | 1831.9 | 1840.0 | 1855.6 | 1843.6 | 1834.6 | 1828.8 | 1828.8 | 1830.6 | 1830.6 | 1830.6 |
| gdb 3784 | 1897.6 <sup>a</sup> | 1893.2 | 1873.9 | 1886.0 | 1897.6 | 1888.4 | 1882.2 | 1881.2 | 1881.2 | 1881.0 | 1881.0 | 1881.0 |
| gdb 3785 | 1879.0 <sup>a</sup> | 1887.7 | 1870.6 | 1881.2 | 1887.6 | 1883.3 | 1877.2 | 1878.6 | 1878.6 | 1876.5 | 1876.5 | 1876.5 |
| gdb 3786 | 1878.3 <sup>a</sup> | 1898.0 | 1881.5 | 1889.5 | 1895.3 | 1888.0 | 1883.6 | 1880.6 | 1880.6 | 1884.9 | 1884.9 | 1884.9 |
| gdb 3787 | 1869.4 <sup>a</sup> | 1871.6 | 1858.4 | 1865.2 | 1866.8 | 1866.6 | 1870.2 | 1868.3 | 1868.3 | 1865.2 | 1865.2 | 1865.2 |
| gdb 3788 | 1872.9 <sup>a</sup> | 1872.1 | 1859.9 | 1866.2 | 1869.7 | 1868.5 | 1872.6 | 1870.7 | 1870.7 | 1868.2 | 1868.2 | 1868.2 |
| gdb 3789 | 1872.5 <sup>a</sup> | 1881.8 | 1872.6 | 1876.3 | 1879.6 | 1874.8 | 1878.9 | 1873.2 | 1873.2 | 1877.0 | 1877.0 | 1877.0 |
| gdb 3790 | 1847.7 <sup>a</sup> | 1845.2 | 1822.9 | 1834.5 | 1845.5 | 1841.8 | 1837.3 | 1838.6 | 1838.6 | 1830.0 | 1829.9 | 1829.9 |
| gdb 3791 | 1843.8 <sup>a</sup> | 1842.5 | 1818.7 | 1831.2 | 1846.3 | 1838.6 | 1830.1 | 1830.3 | 1830.3 | 1825.4 | 1825.4 | 1825.4 |
| gdb 3792 | 1846.0 <sup>a</sup> | 1854.8 | 1835.4 | 1844.5 | 1855.9 | 1848.4 | 1844.3 | 1841.4 | 1841.4 | 1839.0 | 1839.0 | 1839.0 |
| gdb 3793 | 1845.8 <sup>a</sup> | 1853.5 | 1830.3 | 1840.0 | 1856.9 | 1844.1 | 1837.6 | 1833.1 | 1833.1 | 1834.7 | 1834.7 | 1834.7 |
| gdb 3794 | 1894.1 <sup>a</sup> | 1894.0 | 1874.8 | 1885.4 | 1894.9 | 1885.8 | 1880.9 | 1879.3 | 1879.3 | 1878.7 | 1878.7 | 1878.7 |
| gdb 3795 | 1873.2 <sup>a</sup> | 1885.5 | 1866.0 | 1876.3 | 1883.0 | 1875.7 | 1869.9 | 1871.3 | 1871.3 | 1871.0 | 1871.0 | 1871.0 |
| gdb 3796 | 1877.2 <sup>a</sup> | 1887.8 | 1869.2 | 1879.8 | 1885.6 | 1881.9 | 1876.9 | 1877.7 | 1877.7 | 1875.2 | 1875.2 | 1875.2 |
| gdb 3797 | 1878.1 <sup>a</sup> | 1898.4 | 1882.3 | 1890.4 | 1895.9 | 1888.6 | 1884.3 | 1881.1 | 1881.1 | 1884.8 | 1884.7 | 1884.7 |
| gdb 3798 | 1874.6 <sup>a</sup> | 1877.6 | 1867.4 | 1869.6 | 1877.8 | 1875.0 | 1871.1 | 1874.5 | 1874.5 | 1867.3 | 1867.3 | 1867.3 |
| gdb 3799 | 1874.8 <sup>a</sup> | 1887.7 | 1878.5 | 1878.1 | 1887.7 | 1880.2 | 1878.2 | 1876.9 | 1876.9 | 1876.3 | 1876.3 | 1876.3 |
| gdb 3800 | 1889.6 <sup>a</sup> | 1895.3 | 1887.7 | 1895.5 | 1889.8 | 1891.8 | 1896.7 | 1895.6 | 1895.6 | 1898.7 | 1898.7 | 1898.7 |
| gdb 3801 | 1839.6 <sup>a</sup> | 1846.0 | 1838.7 | 1838.3 | 1842.8 | 1835.9 | 1838.0 | 1836.4 | 1836.5 | 1829.4 | 1829.4 | 1829.4 |
| gdb 3802 | 1840.5 <sup>a</sup> | 1856.3 | 1849.8 | 1846.8 | 1848.3 | 1841.1 | 1845.2 | 1839.2 | 1839.2 | 1838.5 | 1838.5 | 1838.5 |
| gdb 3803 | 1843.3 <sup>a</sup> | 1857.4 | 1851.7 | 1848.7 | 1851.2 | 1845.0 | 1847.0 | 1841.4 | 1841.4 | 1841.3 | 1841.3 | 1841.3 |
| gdb 3804 | 1877.3 <sup>a</sup> | 1886.2 | 1871.6 | 1882.0 | 1884.5 | 1877.5 | 1874.1 | 1876.7 | 1876.7 | 1879.0 | 1879.0 | 1879.0 |
| gdb 3805 | 1879.5 <sup>a</sup> | 1886.2 | 1868.8 | 1879.6 | 1881.6 | 1876.6 | 1873.1 | 1874.7 | 1874.7 | 1876.5 | 1876.5 | 1876.5 |
| gdb 3806 | 1870.0 <sup>a</sup> | 1869.3 | 1848.8 | 1864.6 | 1872.9 | 1865.5 | 1855.7 | 1859.4 | 1859.4 | 1860.5 | 1860.5 | 1860.5 |
| gdb 3807 | 1886.5 <sup>a</sup> | 1908.1 | 1887.1 | 1900.4 | 1903.9 | 1896.0 | 1887.7 | 1892.2 | 1892.2 | 1893.0 | 1893.0 | 1893.0 |
| gdb 3808 | 1900.8 <sup>a</sup> | 1901.7 | 1878.1 | 1896.3 | 1903.7 | 1894.0 | 1883.4 | 1889.9 | 1889.9 | 1887.5 | 1887.5 | 1887.5 |
| gdb 3809 | 1886.2 <sup>a</sup> | 1908.2 | 1885.8 | 1900.9 | 1900.8 | 1893.4 | 1886.9 | 1891.8 | 1891.8 | 1892.5 | 1892.5 | 1892.5 |
| gdb 3810 | 1883.1 <sup>a</sup> | 1894.0 | 1868.8 | 1888.1 | 1894.8 | 1886.7 | 1874.4 | 1882.8 | 1882.8 | 1881.4 | 1881.4 | 1881.4 |
| gdb 3811 | 1871.9 <sup>a</sup> | 1874.8 | 1858.5 | 1868.3 | 1879.4 | 1868.8 | 1856.1 | 1861.7 | 1861.7 | 1861.1 | 1861.1 | 1861.1 |
| gdb 3812 | 1868.5 <sup>a</sup> | 1873.1 | 1851.9 | 1864.6 | 1872.5 | 1862.9 | 1853.4 | 1856.8 | 1856.8 | 1857.3 | 1857.3 | 1857.3 |
| gdb 3813 | 1864.1 <sup>a</sup> | 1861.8 | 1838.9 | 1853.7 | 1867.9 | 1858.3 | 1843.3 | 1852.8 | 1852.8 | 1849.5 | 1849.5 | 1849.5 |
| gdb 3814 | 1878.1 <sup>a</sup> | 1888.0 | 1873.1 | 1881.0 | 1887.3 | 1877.8 | 1871.1 | 1873.8 | 1873.8 | 1876.3 | 1876.3 | 1876.3 |
| gdb 3815 | 1858.8 <sup>a</sup> | 1852.8 | 1824.0 | 1839.8 | 1855.2 | 1840.1 | 1837.9 | 1845.8 | 1845.8 | 1844.3 | 1844.3 | 1844.3 |
| gdb 3816 | 1861.3 <sup>a</sup> | 1855.8 | 1825.7 | 1842.7 | 1855.6 | 1841.0 | 1839.0 | 1846.8 | 1846.8 | 1845.7 | 1845.7 | 1845.7 |
| gdb 3817 | 1856.3 <sup>a</sup> | 1844.1 | 1811.1 | 1831.0 | 1852.0 | 1836.8 | 1830.3 | 1843.7 | 1843.7 | 1839.1 | 1839.1 | 1839.1 |
| gdb 3818 | 1872.1 <sup>a</sup> | 1867.1 | 1839.3 | 1854.0 | 1864.6 | 1850.4 | 1850.4 | 1856.1 | 1856.1 | 1858.4 | 1858.4 | 1858.4 |
| gdb 3819 | 1851.0 <sup>a</sup> | 1862.5 | 1838.6 | 1852.4 | 1863.0 | 1854.9 | 1845.5 | 1850.9 | 1850.9 | 1845.3 | 1845.3 | 1845.3 |
| gdb 3820 | 1850.5 <sup>a</sup> | 1863.0 | 1836.8 | 1852.5 | 1861.3 | 1853.0 | 1845.1 | 1850.8 | 1850.8 | 1845.1 | 1845.1 | 1845.1 |
| gdb 3821 | 1849.7 <sup>a</sup> | 1849.1 | 1820.7 | 1839.8 | 1853.4 | 1845.6 | 1832.0 | 1841.5 | 1841.5 | 1833.6 | 1833.6 | 1833.6 |
| gdb 3822 | 1866.1 <sup>a</sup> | 1880.3 | 1857.9 | 1869.9 | 1879.5 | 1867.8 | 1858.7 | 1862.6 | 1862.6 | 1862.7 | 1862.7 | 1862.7 |
| gdb 3823 | 1893.5 <sup>a</sup> | 1912.6 | 1903.7 | 1907.5 | 1910.8 | 1904.5 | 1895.0 | 1899.3 | 1899.3 | 1898.9 | 1898.9 | 1898.9 |
| gdb 3824 | 1884.0 <sup>a</sup> | 1906.8 | 1889.4 | 1903.7 | 1908.2 | 1898.3 | 1884.7 | 1891.7 | 1891.7 | 1892.9 | 1892.9 | 1892.9 |

... continued on next page ...



Table S26: ... continued from previous page. ...

| Molecule | Ref.                | MNDO   | AMI    | PM3    | PM6    | PM7    | OM1    | OM2    |        | OM3    |        | D3T    |
|----------|---------------------|--------|--------|--------|--------|--------|--------|--------|--------|--------|--------|--------|
|          |                     |        |        |        |        |        |        | D2     | D3     | D2     | D3     |        |
| gdb 3825 | 1903.0 <sup>a</sup> | 1900.7 | 1876.6 | 1895.7 | 1906.3 | 1895.8 | 1883.5 | 1890.8 | 1890.8 | 1888.8 | 1888.8 | 1888.8 |
| gdb 3826 | 1885.6 <sup>a</sup> | 1907.6 | 1886.3 | 1901.5 | 1905.7 | 1896.5 | 1886.7 | 1892.4 | 1892.4 | 1893.6 | 1893.6 | 1893.6 |
| gdb 3827 | 1884.9 <sup>a</sup> | 1893.6 | 1869.7 | 1888.8 | 1899.8 | 1889.7 | 1874.6 | 1883.8 | 1883.7 | 1882.7 | 1882.7 | 1882.7 |
| gdb 3828 | 1882.1 <sup>a</sup> | 1889.3 | 1870.0 | 1881.4 | 1883.3 | 1877.1 | 1875.8 | 1879.1 | 1879.1 | 1880.8 | 1880.8 | 1880.8 |
| gdb 3829 | 1876.5 <sup>a</sup> | 1874.7 | 1851.6 | 1868.5 | 1870.8 | 1869.1 | 1865.0 | 1872.3 | 1872.3 | 1868.4 | 1868.4 | 1868.4 |
| gdb 3830 | 1878.7 <sup>a</sup> | 1887.4 | 1867.2 | 1880.3 | 1880.4 | 1874.1 | 1872.3 | 1874.6 | 1874.6 | 1877.8 | 1877.8 | 1877.8 |
| gdb 3831 | 1875.5 <sup>a</sup> | 1873.4 | 1850.9 | 1868.0 | 1875.4 | 1868.4 | 1859.2 | 1865.5 | 1865.5 | 1866.1 | 1866.0 | 1866.0 |
| gdb 3832 | 1897.7 <sup>a</sup> | 1892.3 | 1877.6 | 1890.1 | 1893.7 | 1887.2 | 1885.5 | 1893.7 | 1893.7 | 1895.2 | 1895.2 | 1895.2 |
| gdb 3833 | 1890.8 <sup>a</sup> | 1879.4 | 1861.4 | 1878.3 | 1887.0 | 1879.4 | 1874.3 | 1888.4 | 1888.4 | 1885.6 | 1885.6 | 1885.6 |
| gdb 3834 | 1897.9 <sup>a</sup> | 1892.4 | 1875.9 | 1890.3 | 1891.4 | 1885.1 | 1884.6 | 1892.4 | 1892.3 | 1894.1 | 1894.1 | 1894.1 |
| gdb 3835 | 1889.3 <sup>a</sup> | 1876.4 | 1859.1 | 1876.4 | 1887.4 | 1879.6 | 1873.1 | 1887.5 | 1887.5 | 1886.2 | 1886.2 | 1886.2 |
| gdb 3836 | 1896.1 <sup>a</sup> | 1885.5 | 1884.0 | 1889.0 | 1900.3 | 1895.8 | 1885.4 | 1901.6 | 1901.6 | 1896.3 | 1896.3 | 1896.3 |
| gdb 3837 | 1894.8 <sup>a</sup> | 1879.8 | 1876.0 | 1882.8 | 1896.8 | 1891.3 | 1882.5 | 1903.2 | 1903.2 | 1892.7 | 1892.7 | 1892.7 |
| gdb 3838 | 1900.8 <sup>a</sup> | 1896.2 | 1897.7 | 1899.7 | 1902.3 | 1898.7 | 1892.5 | 1902.7 | 1902.7 | 1901.6 | 1901.6 | 1901.6 |
| gdb 3839 | 1901.9 <sup>a</sup> | 1908.1 | 1900.8 | 1905.3 | 1908.5 | 1904.2 | 1903.0 | 1908.2 | 1908.2 | 1909.7 | 1909.7 | 1909.7 |
| gdb 3840 | 1901.6 <sup>a</sup> | 1894.5 | 1884.5 | 1894.3 | 1896.6 | 1896.6 | 1892.9 | 1902.1 | 1902.1 | 1898.2 | 1898.2 | 1898.2 |
| gdb 3841 | 1903.9 <sup>a</sup> | 1906.8 | 1898.4 | 1904.7 | 1907.6 | 1903.5 | 1901.6 | 1906.4 | 1906.4 | 1909.4 | 1909.4 | 1909.4 |
| gdb 3842 | 1897.4 <sup>a</sup> | 1895.8 | 1884.4 | 1894.0 | 1902.7 | 1898.6 | 1891.9 | 1901.7 | 1901.7 | 1901.3 | 1901.3 | 1901.3 |
| gdb 3843 | 1892.1 <sup>a</sup> | 1888.9 | 1884.2 | 1883.7 | 1894.3 | 1892.3 | 1881.8 | 1887.3 | 1887.3 | 1882.3 | 1882.2 | 1882.2 |
| gdb 3844 | 1888.8 <sup>a</sup> | 1900.0 | 1893.6 | 1890.7 | 1901.9 | 1895.9 | 1888.0 | 1887.1 | 1887.1 | 1889.2 | 1889.2 | 1889.2 |
| gdb 3845 | 1873.9 <sup>a</sup> | 1872.6 | 1854.7 | 1866.4 | 1880.3 | 1869.5 | 1859.0 | 1865.3 | 1865.3 | 1864.6 | 1864.6 | 1864.6 |
| gdb 3846 | 1879.9 <sup>a</sup> | 1887.5 | 1870.6 | 1878.2 | 1885.8 | 1875.7 | 1872.8 | 1876.4 | 1876.4 | 1877.1 | 1877.0 | 1877.0 |
| gdb 3847 | 1891.6 <sup>a</sup> | 1911.7 | 1903.8 | 1907.5 | 1911.0 | 1904.8 | 1895.0 | 1899.5 | 1899.5 | 1899.2 | 1899.1 | 1899.1 |
| gdb 3848 | 1870.1 <sup>a</sup> | 1876.1 | 1863.3 | 1871.7 | 1882.2 | 1873.1 | 1859.4 | 1869.1 | 1869.0 | 1866.2 | 1866.2 | 1866.2 |
| gdb 3849 | 1877.6 <sup>a</sup> | 1894.3 | 1879.4 | 1884.2 | 1893.2 | 1886.3 | 1877.0 | 1882.1 | 1882.1 | 1881.9 | 1881.9 | 1881.9 |
| gdb 3850 | 1869.2 <sup>a</sup> | 1880.2 | 1863.0 | 1871.2 | 1880.5 | 1872.5 | 1864.5 | 1872.7 | 1872.7 | 1870.1 | 1870.1 | 1870.1 |
| gdb 3851 | 1878.0 <sup>a</sup> | 1895.7 | 1878.7 | 1884.6 | 1888.9 | 1882.7 | 1877.2 | 1880.8 | 1880.8 | 1881.2 | 1881.2 | 1881.2 |
| gdb 3852 | 1837.3 <sup>a</sup> | 1831.9 | 1790.9 | 1815.3 | 1837.4 | 1819.3 | 1810.7 | 1819.0 | 1819.0 | 1814.3 | 1814.3 | 1814.3 |
| gdb 3853 | 1835.4 <sup>a</sup> | 1842.7 | 1806.7 | 1828.1 | 1844.2 | 1828.5 | 1821.8 | 1826.4 | 1826.4 | 1824.5 | 1824.5 | 1824.5 |
| gdb 3854 | 1842.7 <sup>a</sup> | 1857.8 | 1822.3 | 1841.3 | 1853.7 | 1841.4 | 1823.7 | 1823.8 | 1823.7 | 1822.0 | 1822.0 | 1822.0 |
| gdb 3855 | 1847.3 <sup>a</sup> | 1871.1 | 1843.1 | 1856.6 | 1868.3 | 1854.8 | 1839.2 | 1838.3 | 1838.3 | 1838.3 | 1838.3 | 1838.3 |
| gdb 3856 | 1902.0 <sup>a</sup> | 1908.8 | 1882.7 | 1901.5 | 1910.0 | 1899.3 | 1888.0 | 1891.3 | 1891.3 | 1890.2 | 1890.2 | 1890.2 |
| gdb 3857 | 1883.8 <sup>a</sup> | 1902.1 | 1876.6 | 1895.0 | 1904.5 | 1893.8 | 1880.1 | 1885.9 | 1885.9 | 1885.6 | 1885.6 | 1885.6 |
| gdb 3858 | 1884.3 <sup>a</sup> | 1913.0 | 1894.3 | 1907.7 | 1912.7 | 1902.1 | 1888.9 | 1892.9 | 1892.9 | 1895.1 | 1895.1 | 1895.1 |
| gdb 3859 | 1880.8 <sup>a</sup> | 1902.7 | 1891.5 | 1896.2 | 1903.8 | 1896.2 | 1884.6 | 1890.4 | 1890.4 | 1887.6 | 1887.6 | 1887.6 |
| gdb 3860 | 1883.2 <sup>a</sup> | 1887.5 | 1872.8 | 1883.6 | 1891.1 | 1884.3 | 1876.8 | 1883.8 | 1883.8 | 1885.3 | 1885.3 | 1885.3 |
| gdb 3861 | 1878.2 <sup>a</sup> | 1874.0 | 1853.4 | 1869.2 | 1875.3 | 1873.3 | 1867.4 | 1876.4 | 1876.4 | 1872.2 | 1872.2 | 1872.2 |
| gdb 3862 | 1877.1 <sup>a</sup> | 1871.5 | 1850.6 | 1866.8 | 1878.0 | 1872.1 | 1862.0 | 1869.8 | 1869.8 | 1870.3 | 1870.3 | 1870.3 |
| gdb 3863 | 1847.9 <sup>a</sup> | 1847.0 | 1820.4 | 1833.5 | 1843.5 | 1840.5 | 1835.7 | 1839.4 | 1839.4 | 1830.0 | 1830.0 | 1830.0 |
| gdb 3864 | 1847.2 <sup>a</sup> | 1843.8 | 1816.6 | 1830.6 | 1845.2 | 1838.1 | 1828.7 | 1831.1 | 1831.1 | 1826.1 | 1826.1 | 1826.1 |
| gdb 3865 | 1853.3 <sup>a</sup> | 1860.5 | 1839.6 | 1847.6 | 1859.0 | 1851.3 | 1845.2 | 1846.1 | 1846.1 | 1842.4 | 1842.4 | 1842.4 |
| gdb 3866 | 1853.3 <sup>a</sup> | 1858.9 | 1832.5 | 1843.4 | 1855.9 | 1849.5 | 1846.4 | 1847.3 | 1847.3 | 1842.9 | 1842.9 | 1842.9 |
| gdb 3867 | 1882.1 <sup>a</sup> | 1889.0 | 1869.8 | 1881.1 | 1882.0 | 1876.2 | 1875.1 | 1877.9 | 1877.9 | 1879.7 | 1879.7 | 1879.7 |
| gdb 3868 | 1879.2 <sup>a</sup> | 1887.8 | 1867.4 | 1880.4 | 1880.0 | 1874.1 | 1873.1 | 1875.3 | 1875.3 | 1878.4 | 1878.4 | 1878.4 |
| gdb 3869 | 1877.1 <sup>a</sup> | 1875.6 | 1852.0 | 1869.5 | 1870.2 | 1869.0 | 1865.7 | 1872.4 | 1872.4 | 1868.7 | 1868.7 | 1868.7 |

... continued on next page ...

Table S26: ... continued from previous page ...

| Molecule | Ref.                | MNDO   | AMI    | PM3    | PM6    | PM7    | OM1    | OM2    |        | OM3    |        | D3T    |
|----------|---------------------|--------|--------|--------|--------|--------|--------|--------|--------|--------|--------|--------|
|          |                     |        |        |        |        |        |        | D2     | D3     | D2     | D3     |        |
| gdb 3870 | 1873.1 <sup>a</sup> | 1873.0 | 1850.0 | 1867.3 | 1871.6 | 1865.8 | 1858.2 | 1863.9 | 1863.9 | 1864.6 | 1864.6 | 1864.6 |
| gdb 3871 | 1884.9 <sup>a</sup> | 1876.3 | 1862.4 | 1875.9 | 1878.5 | 1874.3 | 1873.8 | 1883.0 | 1883.0 | 1880.0 | 1880.0 | 1880.0 |
| gdb 3872 | 1884.5 <sup>a</sup> | 1873.5 | 1861.3 | 1874.7 | 1878.7 | 1874.1 | 1872.8 | 1883.0 | 1883.0 | 1880.9 | 1880.9 | 1880.9 |
| gdb 3873 | 1891.5 <sup>a</sup> | 1888.7 | 1880.9 | 1890.0 | 1886.8 | 1882.9 | 1882.8 | 1888.5 | 1888.5 | 1889.5 | 1889.5 | 1889.5 |
| gdb 3874 | 1885.2 <sup>a</sup> | 1890.1 | 1877.9 | 1881.9 | 1886.7 | 1884.4 | 1879.2 | 1883.9 | 1883.9 | 1879.3 | 1879.3 | 1879.3 |
| gdb 3875 | 1852.1 <sup>a</sup> | 1862.3 | 1829.2 | 1845.3 | 1852.6 | 1848.5 | 1844.6 | 1848.4 | 1848.4 | 1838.5 | 1838.5 | 1838.5 |
| gdb 3876 | 1849.5 <sup>a</sup> | 1859.5 | 1823.8 | 1842.3 | 1854.0 | 1846.9 | 1837.7 | 1841.5 | 1841.5 | 1835.2 | 1835.2 | 1835.2 |
| gdb 3877 | 1854.8 <sup>a</sup> | 1873.9 | 1845.0 | 1857.4 | 1866.6 | 1858.8 | 1854.2 | 1855.9 | 1855.9 | 1851.2 | 1851.1 | 1851.1 |
| gdb 3878 | 1855.7 <sup>a</sup> | 1873.3 | 1845.1 | 1858.0 | 1868.7 | 1860.5 | 1855.0 | 1857.0 | 1857.0 | 1852.5 | 1852.5 | 1852.5 |
| gdb 3879 | 1871.7 <sup>a</sup> | 1884.8 | 1866.3 | 1878.1 | 1878.3 | 1875.8 | 1874.2 | 1875.7 | 1875.6 | 1871.9 | 1871.8 | 1871.8 |
| gdb 3880 | 1870.2 <sup>a</sup> | 1882.5 | 1860.7 | 1875.7 | 1880.6 | 1874.9 | 1868.3 | 1868.6 | 1868.6 | 1869.2 | 1869.2 | 1869.2 |
| gdb 3881 | 1873.9 <sup>a</sup> | 1895.9 | 1881.2 | 1890.0 | 1892.4 | 1886.1 | 1883.1 | 1882.8 | 1882.8 | 1884.5 | 1884.4 | 1884.4 |
| gdb 3882 | 1872.9 <sup>a</sup> | 1866.8 | 1851.8 | 1859.1 | 1865.8 | 1864.5 | 1862.8 | 1866.6 | 1866.6 | 1857.1 | 1857.1 | 1857.1 |
| gdb 3883 | 1868.2 <sup>a</sup> | 1865.4 | 1847.9 | 1857.1 | 1868.5 | 1865.2 | 1859.9 | 1864.7 | 1864.6 | 1858.6 | 1858.6 | 1858.6 |
| gdb 3884 | 1875.6 <sup>a</sup> | 1877.3 | 1866.3 | 1870.2 | 1879.6 | 1874.6 | 1871.1 | 1873.7 | 1873.7 | 1869.4 | 1869.3 | 1869.3 |
| gdb 3885 | 1875.7 <sup>a</sup> | 1879.0 | 1868.0 | 1871.2 | 1881.6 | 1875.8 | 1872.7 | 1875.2 | 1875.1 | 1871.3 | 1871.3 | 1871.3 |
| gdb 3886 | 1885.5 <sup>a</sup> | 1891.3 | 1880.8 | 1884.8 | 1890.5 | 1887.8 | 1879.5 | 1885.4 | 1885.4 | 1881.0 | 1881.0 | 1881.0 |
| gdb 3887 | 1910.5 <sup>a</sup> | 1909.2 | 1898.1 | 1907.6 | 1913.0 | 1907.8 | 1905.6 | 1909.2 | 1909.2 | 1908.5 | 1908.5 | 1908.5 |
| gdb 3888 | 1897.1 <sup>a</sup> | 1899.3 | 1892.0 | 1897.8 | 1901.7 | 1900.6 | 1898.0 | 1903.7 | 1903.7 | 1900.6 | 1900.6 | 1900.6 |
| gdb 3889 | 1893.0 <sup>a</sup> | 1899.9 | 1888.6 | 1896.9 | 1904.8 | 1901.3 | 1896.2 | 1901.9 | 1901.8 | 1902.4 | 1902.3 | 1902.3 |
| gdb 3890 | 1900.1 <sup>a</sup> | 1910.4 | 1904.3 | 1906.9 | 1910.2 | 1906.2 | 1906.0 | 1908.2 | 1908.2 | 1910.1 | 1910.1 | 1910.1 |
| gdb 3891 | 1887.4 <sup>a</sup> | 1889.1 | 1886.0 | 1882.7 | 1891.6 | 1888.6 | 1880.5 | 1883.0 | 1883.0 | 1878.8 | 1878.8 | 1878.8 |
| gdb 3892 | 1872.8 <sup>a</sup> | 1887.6 | 1866.1 | 1879.6 | 1878.0 | 1876.4 | 1874.7 | 1875.9 | 1875.9 | 1872.1 | 1872.1 | 1872.1 |
| gdb 3893 | 1873.4 <sup>a</sup> | 1885.6 | 1863.1 | 1877.4 | 1882.9 | 1876.5 | 1870.7 | 1870.5 | 1870.5 | 1871.3 | 1871.3 | 1871.3 |
| gdb 3894 | 1876.5 <sup>a</sup> | 1898.3 | 1882.9 | 1891.6 | 1893.7 | 1886.9 | 1883.7 | 1882.9 | 1882.9 | 1885.0 | 1885.0 | 1885.0 |
| gdb 3895 | 1852.6 <sup>a</sup> | 1859.4 | 1826.8 | 1846.6 | 1857.8 | 1849.2 | 1837.9 | 1843.1 | 1843.1 | 1836.0 | 1836.0 | 1836.0 |
| gdb 3896 | 1852.0 <sup>a</sup> | 1869.4 | 1842.0 | 1858.1 | 1872.5 | 1859.3 | 1843.6 | 1846.3 | 1846.3 | 1846.0 | 1845.9 | 1845.9 |
| gdb 3897 | 1853.7 <sup>a</sup> | 1871.2 | 1843.8 | 1857.9 | 1866.7 | 1857.8 | 1850.3 | 1852.2 | 1852.2 | 1847.5 | 1847.5 | 1847.5 |
| gdb 3898 | 1884.3 <sup>a</sup> | 1883.7 | 1867.3 | 1879.1 | 1884.3 | 1877.3 | 1872.3 | 1872.5 | 1872.5 | 1871.9 | 1871.9 | 1871.9 |
| gdb 3899 | 1870.9 <sup>a</sup> | 1872.4 | 1854.9 | 1868.1 | 1870.8 | 1868.6 | 1865.1 | 1868.1 | 1868.1 | 1865.5 | 1865.5 | 1865.5 |
| gdb 3900 | 1868.8 <sup>a</sup> | 1869.8 | 1851.4 | 1865.0 | 1873.1 | 1866.6 | 1858.3 | 1859.7 | 1859.7 | 1861.6 | 1861.6 | 1861.6 |
| gdb 3901 | 1873.8 <sup>a</sup> | 1885.8 | 1870.9 | 1879.3 | 1881.4 | 1875.6 | 1874.7 | 1873.4 | 1873.4 | 1876.2 | 1876.2 | 1876.2 |
| gdb 3902 | 1871.9 <sup>a</sup> | 1892.2 | 1871.2 | 1884.3 | 1883.5 | 1877.6 | 1870.5 | 1872.5 | 1872.5 | 1870.2 | 1870.2 | 1870.2 |
| gdb 3903 | 1872.5 <sup>a</sup> | 1891.9 | 1870.6 | 1885.1 | 1884.3 | 1879.0 | 1871.4 | 1874.3 | 1874.3 | 1872.1 | 1872.1 | 1872.1 |
| gdb 3904 | 1875.6 <sup>a</sup> | 1892.6 | 1870.2 | 1885.8 | 1886.5 | 1881.5 | 1873.9 | 1877.1 | 1877.1 | 1874.9 | 1874.9 | 1874.9 |
| gdb 3905 | 1877.5 <sup>a</sup> | 1905.8 | 1888.2 | 1898.2 | 1894.8 | 1890.0 | 1886.3 | 1886.2 | 1886.2 | 1886.2 | 1886.2 | 1886.2 |
| gdb 3906 | 1877.6 <sup>a</sup> | 1902.4 | 1874.1 | 1891.1 | 1894.0 | 1886.1 | 1877.8 | 1881.3 | 1881.3 | 1879.5 | 1879.5 | 1879.5 |
| gdb 3907 | 1875.5 <sup>a</sup> | 1902.3 | 1876.3 | 1890.8 | 1893.7 | 1884.7 | 1875.2 | 1877.8 | 1877.8 | 1876.5 | 1876.5 | 1876.5 |
| gdb 3908 | 1882.5 <sup>a</sup> | 1902.6 | 1874.2 | 1891.5 | 1895.0 | 1887.8 | 1879.7 | 1884.4 | 1884.4 | 1882.7 | 1882.7 | 1882.7 |
| gdb 3909 | 1882.4 <sup>a</sup> | 1914.7 | 1890.7 | 1903.6 | 1902.7 | 1895.3 | 1890.9 | 1890.6 | 1890.6 | 1891.4 | 1891.4 | 1891.4 |
| gdb 3910 | 1877.1 <sup>a</sup> | 1891.0 | 1874.3 | 1881.2 | 1889.8 | 1882.6 | 1871.4 | 1878.9 | 1878.9 | 1872.8 | 1872.8 | 1872.8 |
| gdb 3911 | 1882.9 <sup>a</sup> | 1889.1 | 1884.8 | 1889.8 | 1896.3 | 1889.2 | 1880.5 | 1882.7 | 1882.7 | 1880.0 | 1880.0 | 1880.0 |
| gdb 3912 | 1878.6 <sup>a</sup> | 1899.4 | 1887.0 | 1889.5 | 1893.1 | 1885.6 | 1877.5 | 1879.2 | 1879.2 | 1876.4 | 1876.4 | 1876.4 |
| gdb 3913 | 1879.7 <sup>a</sup> | 1901.4 | 1875.0 | 1891.4 | 1894.2 | 1886.0 | 1876.2 | 1881.2 | 1881.2 | 1880.0 | 1879.9 | 1879.9 |
| gdb 3914 | 1882.1 <sup>a</sup> | 1902.3 | 1874.3 | 1892.5 | 1898.0 | 1889.7 | 1879.6 | 1884.1 | 1884.2 | 1882.7 | 1882.7 | 1882.7 |

... continued on next page ...

Table S26: ... continued from previous page ...

| Molecule | Ref.                | MNDO   | AMI    | PM3    | PM6    | PM7    | OM1    | OM2    |        | OM3    |        | D3T    |
|----------|---------------------|--------|--------|--------|--------|--------|--------|--------|--------|--------|--------|--------|
|          |                     |        |        |        |        |        |        | D2     | D3     | D2     | D3     |        |
| gdb 3915 | 1898.5 <sup>a</sup> | 1909.3 | 1883.5 | 1899.6 | 1905.4 | 1894.8 | 1885.8 | 1887.8 | 1887.8 | 1885.9 | 1885.9 | 1885.9 |
| gdb 3916 | 1885.7 <sup>a</sup> | 1914.4 | 1891.8 | 1904.1 | 1906.8 | 1898.6 | 1891.8 | 1893.0 | 1893.0 | 1894.2 | 1894.2 | 1894.2 |
| gdb 3917 | 1816.5 <sup>a</sup> | 1807.7 | 1772.2 | 1793.6 | 1819.8 | 1801.8 | 1788.7 | 1802.8 | 1802.8 | 1800.3 | 1800.3 | 1800.3 |
| gdb 3918 | 1811.5 <sup>a</sup> | 1796.1 | 1755.1 | 1780.7 | 1800.6 | 1783.4 | 1774.9 | 1783.4 | 1783.4 | 1784.7 | 1784.7 | 1784.7 |
| gdb 3919 | 1822.9 <sup>a</sup> | 1820.9 | 1783.2 | 1801.7 | 1817.2 | 1799.4 | 1796.7 | 1802.3 | 1802.3 | 1805.3 | 1805.3 | 1805.3 |
| gdb 3920 | 1798.2 <sup>a</sup> | 1784.0 | 1752.1 | 1773.7 | 1798.5 | 1781.0 | 1771.9 | 1783.1 | 1783.1 | 1782.4 | 1782.4 | 1782.4 |
| gdb 3921 | 1803.3 <sup>a</sup> | 1787.2 | 1755.6 | 1777.0 | 1801.2 | 1784.0 | 1775.0 | 1786.0 | 1786.0 | 1786.0 | 1786.0 | 1786.0 |
| gdb 3922 | 1807.6 <sup>a</sup> | 1790.7 | 1754.3 | 1776.0 | 1798.0 | 1781.8 | 1774.2 | 1784.1 | 1784.1 | 1785.1 | 1785.0 | 1785.0 |
| gdb 3923 | 1816.4 <sup>a</sup> | 1814.4 | 1782.9 | 1798.7 | 1816.6 | 1801.1 | 1795.8 | 1802.4 | 1802.4 | 1804.6 | 1804.5 | 1804.5 |
| gdb 3924 | 1841.8 <sup>a</sup> | 1825.0 | 1799.9 | 1819.0 | 1838.2 | 1823.4 | 1812.7 | 1825.9 | 1825.9 | 1822.2 | 1822.2 | 1822.2 |
| gdb 3925 | 1851.9 <sup>a</sup> | 1847.7 | 1826.2 | 1838.6 | 1853.6 | 1840.4 | 1833.1 | 1842.2 | 1842.2 | 1840.7 | 1840.7 | 1840.7 |
| gdb 3926 | 1850.7 <sup>a</sup> | 1845.6 | 1821.1 | 1835.9 | 1852.1 | 1838.8 | 1832.7 | 1841.7 | 1841.7 | 1839.8 | 1839.8 | 1839.8 |
| gdb 3927 | 1812.9 <sup>a</sup> | 1805.4 | 1774.1 | 1790.9 | 1817.1 | 1800.4 | 1791.8 | 1803.0 | 1803.0 | 1799.9 | 1799.9 | 1799.9 |
| gdb 3928 | 1815.9 <sup>a</sup> | 1807.6 | 1776.5 | 1794.0 | 1816.5 | 1799.8 | 1793.5 | 1804.2 | 1804.2 | 1801.0 | 1801.0 | 1801.0 |
| gdb 3929 | 1808.3 <sup>a</sup> | 1791.8 | 1758.8 | 1781.4 | 1802.3 | 1785.0 | 1776.7 | 1786.0 | 1786.0 | 1786.5 | 1786.5 | 1786.5 |
| gdb 3930 | 1817.4 <sup>a</sup> | 1815.1 | 1786.3 | 1802.5 | 1819.1 | 1801.7 | 1794.8 | 1798.5 | 1798.5 | 1802.1 | 1802.1 | 1802.1 |
| gdb 3931 | 1840.4 <sup>a</sup> | 1826.3 | 1805.9 | 1821.5 | 1843.5 | 1828.7 | 1815.1 | 1828.0 | 1828.0 | 1823.6 | 1823.6 | 1823.6 |
| gdb 3932 | 1846.4 <sup>a</sup> | 1847.8 | 1825.0 | 1837.5 | 1851.6 | 1839.5 | 1831.6 | 1840.8 | 1840.8 | 1839.1 | 1839.1 | 1839.1 |
| gdb 3933 | 1848.7 <sup>a</sup> | 1847.8 | 1831.4 | 1840.5 | 1857.5 | 1844.2 | 1834.0 | 1843.3 | 1843.3 | 1841.3 | 1841.3 | 1841.3 |
| gdb 3934 | 1858.0 <sup>a</sup> | 1855.9 | 1833.0 | 1845.6 | 1862.0 | 1851.0 | 1842.8 | 1851.8 | 1851.8 | 1848.0 | 1848.0 | 1848.0 |
| gdb 3935 | 1851.7 <sup>a</sup> | 1854.5 | 1833.7 | 1844.3 | 1856.0 | 1844.7 | 1834.3 | 1852.3 | 1852.2 | 1841.9 | 1841.9 | 1841.9 |
| gdb 3936 | 1858.5 <sup>a</sup> | 1851.3 | 1831.2 | 1843.5 | 1854.0 | 1847.7 | 1841.3 | 1851.3 | 1851.3 | 1844.4 | 1844.4 | 1844.4 |
| gdb 3937 | 1855.9 <sup>a</sup> | 1848.1 | 1830.2 | 1841.8 | 1857.5 | 1845.6 | 1834.2 | 1841.9 | 1841.9 | 1839.9 | 1839.9 | 1839.9 |
| gdb 3938 | 1851.6 <sup>a</sup> | 1846.6 | 1824.1 | 1839.2 | 1852.2 | 1841.4 | 1829.5 | 1838.0 | 1838.0 | 1836.6 | 1836.6 | 1836.6 |
| gdb 3939 | 1861.7 <sup>a</sup> | 1869.1 | 1851.6 | 1860.6 | 1870.0 | 1858.9 | 1852.7 | 1856.6 | 1856.5 | 1856.6 | 1856.5 | 1856.5 |
| gdb 3940 | 1866.2 <sup>a</sup> | 1871.0 | 1857.8 | 1863.4 | 1874.3 | 1861.9 | 1857.2 | 1860.9 | 1860.9 | 1860.2 | 1860.2 | 1860.2 |
| gdb 3941 | 1862.2 <sup>a</sup> | 1870.7 | 1850.5 | 1858.8 | 1867.6 | 1857.5 | 1853.0 | 1857.7 | 1857.7 | 1857.3 | 1857.3 | 1857.3 |
| gdb 3942 | 1871.7 <sup>a</sup> | 1869.0 | 1848.9 | 1859.9 | 1866.8 | 1861.3 | 1857.5 | 1862.5 | 1862.5 | 1859.2 | 1859.2 | 1859.1 |
| gdb 3943 | 1850.9 <sup>a</sup> | 1845.2 | 1823.5 | 1838.4 | 1852.0 | 1841.3 | 1829.5 | 1838.0 | 1838.0 | 1836.5 | 1836.5 | 1836.5 |
| gdb 3944 | 1854.7 <sup>a</sup> | 1854.4 | 1832.7 | 1845.6 | 1860.5 | 1849.8 | 1838.5 | 1855.4 | 1855.4 | 1846.7 | 1846.7 | 1846.7 |
| gdb 3945 | 1860.4 <sup>a</sup> | 1862.5 | 1844.6 | 1853.2 | 1865.7 | 1854.8 | 1845.6 | 1848.3 | 1848.3 | 1849.5 | 1849.5 | 1849.5 |
| gdb 3946 | 1868.6 <sup>a</sup> | 1865.2 | 1845.8 | 1856.4 | 1866.4 | 1860.9 | 1856.0 | 1861.6 | 1861.6 | 1858.1 | 1858.1 | 1858.1 |
| gdb 3947 | 1830.4 <sup>a</sup> | 1844.6 | 1810.9 | 1832.4 | 1844.3 | 1831.6 | 1810.5 | 1815.0 | 1815.0 | 1812.5 | 1812.5 | 1812.5 |
| gdb 3948 | 1833.8 <sup>a</sup> | 1844.9 | 1810.6 | 1833.2 | 1846.6 | 1834.2 | 1812.9 | 1817.9 | 1817.9 | 1815.4 | 1815.4 | 1815.4 |
| gdb 3949 | 1838.9 <sup>a</sup> | 1864.9 | 1833.9 | 1850.8 | 1864.3 | 1848.7 | 1831.5 | 1833.4 | 1833.4 | 1832.3 | 1832.3 | 1832.3 |
| gdb 3950 | 1835.9 <sup>a</sup> | 1866.6 | 1832.0 | 1849.5 | 1856.5 | 1845.0 | 1829.0 | 1830.7 | 1830.7 | 1829.4 | 1829.4 | 1829.4 |
| gdb 3951 | 1845.2 <sup>a</sup> | 1836.3 | 1812.1 | 1827.3 | 1843.3 | 1832.6 | 1819.8 | 1832.4 | 1832.4 | 1825.4 | 1825.4 | 1825.4 |
| gdb 3952 | 1836.1 <sup>a</sup> | 1823.1 | 1801.3 | 1818.7 | 1836.8 | 1823.6 | 1812.1 | 1824.7 | 1824.7 | 1820.4 | 1820.4 | 1820.4 |
| gdb 3953 | 1849.9 <sup>a</sup> | 1845.1 | 1823.8 | 1836.6 | 1849.7 | 1838.2 | 1829.9 | 1836.4 | 1836.4 | 1834.9 | 1834.9 | 1834.9 |
| gdb 3954 | 1856.8 <sup>a</sup> | 1854.4 | 1833.6 | 1846.3 | 1862.7 | 1851.7 | 1839.5 | 1850.5 | 1850.5 | 1846.5 | 1846.5 | 1846.5 |
| gdb 3955 | 1850.4 <sup>a</sup> | 1845.7 | 1827.3 | 1838.1 | 1850.6 | 1839.4 | 1831.4 | 1837.4 | 1837.4 | 1835.5 | 1835.5 | 1835.5 |
| gdb 3956 | 1849.6 <sup>a</sup> | 1870.9 | 1834.6 | 1854.2 | 1864.6 | 1851.1 | 1833.9 | 1839.3 | 1839.3 | 1834.6 | 1834.6 | 1834.6 |
| gdb 3957 | 1852.9 <sup>a</sup> | 1871.6 | 1834.3 | 1854.9 | 1866.9 | 1853.7 | 1836.8 | 1842.3 | 1842.3 | 1837.7 | 1837.7 | 1837.7 |
| gdb 3958 | 1850.7 <sup>a</sup> | 1871.9 | 1835.2 | 1855.0 | 1866.8 | 1852.5 | 1835.9 | 1841.1 | 1841.1 | 1836.1 | 1836.1 | 1836.1 |
| gdb 3959 | 1854.3 <sup>a</sup> | 1886.8 | 1853.3 | 1868.7 | 1877.8 | 1865.0 | 1851.4 | 1852.6 | 1852.6 | 1850.1 | 1850.1 | 1850.1 |

... continued on next page ...

Table S26: ... continued from previous page. ...

| Molecule | Ref.                | MNDO   | AMI    | PM3    | PM6    | PM7    | OM1    | OM2    |        | OM3    |        | D3T    |
|----------|---------------------|--------|--------|--------|--------|--------|--------|--------|--------|--------|--------|--------|
|          |                     |        |        |        |        |        |        | D2     | D3     | D2     | D3     |        |
| gdb 3960 | 1852.4 <sup>a</sup> | 1887.2 | 1854.7 | 1869.0 | 1877.9 | 1864.2 | 1850.5 | 1851.9 | 1851.9 | 1849.3 | 1849.3 | 1849.3 |
| gdb 3961 | 1854.4 <sup>a</sup> | 1886.7 | 1852.4 | 1868.3 | 1876.8 | 1863.4 | 1850.5 | 1852.4 | 1852.4 | 1849.8 | 1849.8 | 1849.8 |
| gdb 3962 | 1867.5 <sup>a</sup> | 1889.4 | 1868.4 | 1878.6 | 1878.5 | 1871.8 | 1865.2 | 1869.7 | 1869.7 | 1868.0 | 1867.9 | 1868.0 |
| gdb 3963 | 1893.8 <sup>a</sup> | 1914.0 | 1906.7 | 1904.0 | 1906.8 | 1901.0 | 1896.9 | 1900.2 | 1900.2 | 1898.8 | 1898.8 | 1898.8 |
| gdb 3964 | 1868.1 <sup>a</sup> | 1882.6 | 1864.1 | 1870.3 | 1876.9 | 1870.2 | 1865.7 | 1870.1 | 1870.1 | 1867.8 | 1867.8 | 1867.8 |
| gdb 3965 | 1876.8 <sup>a</sup> | 1897.5 | 1887.3 | 1889.3 | 1895.6 | 1887.9 | 1876.9 | 1881.2 | 1881.2 | 1881.9 | 1881.9 | 1881.9 |
| gdb 3966 | 1876.4 <sup>a</sup> | 1898.0 | 1887.2 | 1887.2 | 1895.1 | 1888.0 | 1880.5 | 1881.8 | 1881.8 | 1882.4 | 1882.4 | 1882.4 |
| gdb 3967 | 1872.0 <sup>a</sup> | 1881.4 | 1864.3 | 1871.4 | 1881.5 | 1874.0 | 1866.0 | 1874.5 | 1874.5 | 1871.2 | 1871.2 | 1871.2 |
| gdb 3968 | 1878.0 <sup>a</sup> | 1896.9 | 1881.1 | 1885.6 | 1890.7 | 1885.0 | 1879.5 | 1883.2 | 1883.2 | 1883.2 | 1883.2 | 1883.2 |
| gdb 3969 | 1877.0 <sup>a</sup> | 1902.5 | 1890.4 | 1889.2 | 1895.9 | 1889.3 | 1880.6 | 1881.1 | 1881.1 | 1879.0 | 1878.9 | 1878.9 |
| gdb 3970 | 1875.0 <sup>a</sup> | 1900.5 | 1889.2 | 1887.1 | 1895.7 | 1887.9 | 1877.3 | 1878.2 | 1878.2 | 1876.0 | 1876.0 | 1876.0 |
| gdb 3971 | 1886.4 <sup>a</sup> | 1907.1 | 1887.5 | 1900.9 | 1904.7 | 1896.4 | 1887.2 | 1892.1 | 1892.1 | 1892.9 | 1892.9 | 1892.9 |
| gdb 3972 | 1886.2 <sup>a</sup> | 1906.9 | 1886.9 | 1901.9 | 1904.6 | 1896.3 | 1887.2 | 1892.9 | 1892.9 | 1893.9 | 1893.8 | 1893.8 |
| gdb 3973 | 1903.0 <sup>a</sup> | 1900.5 | 1876.2 | 1895.3 | 1904.9 | 1895.4 | 1884.0 | 1890.6 | 1890.6 | 1888.6 | 1888.6 | 1888.6 |
| gdb 3974 | 1878.8 <sup>a</sup> | 1891.7 | 1868.9 | 1887.2 | 1892.8 | 1883.9 | 1871.0 | 1879.5 | 1879.4 | 1877.9 | 1877.9 | 1877.9 |
| gdb 3975 | 1881.8 <sup>a</sup> | 1907.3 | 1889.4 | 1901.6 | 1904.1 | 1895.9 | 1886.3 | 1889.8 | 1889.8 | 1891.1 | 1891.1 | 1891.1 |
| gdb 3976 | 1881.7 <sup>a</sup> | 1906.7 | 1884.7 | 1896.1 | 1897.4 | 1890.2 | 1885.9 | 1887.3 | 1887.2 | 1887.9 | 1887.9 | 1887.9 |
| gdb 3977 | 1880.3 <sup>a</sup> | 1893.1 | 1870.5 | 1886.6 | 1894.5 | 1885.6 | 1874.4 | 1879.8 | 1879.8 | 1878.5 | 1878.5 | 1878.5 |
| gdb 3978 | 1866.8 <sup>a</sup> | 1878.8 | 1860.8 | 1867.7 | 1873.6 | 1866.7 | 1860.1 | 1863.7 | 1863.7 | 1861.6 | 1861.6 | 1861.6 |
| gdb 3979 | 1877.8 <sup>a</sup> | 1897.6 | 1886.7 | 1889.3 | 1894.5 | 1887.5 | 1877.8 | 1881.6 | 1881.6 | 1882.0 | 1882.0 | 1882.0 |
| gdb 3980 | 1889.2 <sup>a</sup> | 1893.7 | 1888.3 | 1892.2 | 1895.0 | 1890.6 | 1891.0 | 1892.7 | 1892.7 | 1892.9 | 1892.8 | 1892.8 |
| gdb 3981 | 1896.9 <sup>a</sup> | 1904.9 | 1902.5 | 1901.8 | 1901.6 | 1897.7 | 1903.1 | 1900.4 | 1900.4 | 1903.1 | 1903.1 | 1903.1 |
| gdb 3982 | 1842.9 <sup>a</sup> | 1842.2 | 1819.5 | 1830.6 | 1845.5 | 1837.0 | 1828.6 | 1828.1 | 1828.1 | 1823.3 | 1823.3 | 1823.3 |
| gdb 3983 | 1850.0 <sup>a</sup> | 1858.6 | 1838.1 | 1844.5 | 1854.7 | 1847.5 | 1846.4 | 1843.4 | 1843.4 | 1839.9 | 1839.9 | 1839.9 |
| gdb 3984 | 1878.8 <sup>a</sup> | 1886.4 | 1869.1 | 1879.2 | 1881.2 | 1875.4 | 1875.3 | 1876.5 | 1876.4 | 1878.3 | 1878.3 | 1878.3 |
| gdb 3985 | 1879.5 <sup>a</sup> | 1885.5 | 1867.9 | 1878.6 | 1880.6 | 1876.0 | 1873.4 | 1875.0 | 1875.0 | 1876.6 | 1876.6 | 1876.6 |
| gdb 3986 | 1869.1 <sup>a</sup> | 1870.3 | 1851.0 | 1865.1 | 1871.8 | 1864.6 | 1856.1 | 1859.9 | 1859.9 | 1860.4 | 1860.4 | 1860.4 |
| gdb 3987 | 1870.5 <sup>a</sup> | 1890.7 | 1871.1 | 1883.8 | 1883.7 | 1878.6 | 1872.1 | 1872.6 | 1872.6 | 1871.1 | 1871.0 | 1871.0 |
| gdb 3988 | 1873.7 <sup>a</sup> | 1891.0 | 1873.0 | 1885.7 | 1887.4 | 1881.2 | 1873.9 | 1874.7 | 1874.7 | 1873.6 | 1873.6 | 1873.6 |
| gdb 3989 | 1875.2 <sup>a</sup> | 1904.8 | 1889.1 | 1897.6 | 1894.4 | 1889.5 | 1886.5 | 1884.0 | 1884.0 | 1885.2 | 1885.2 | 1885.2 |
| gdb 3990 | 1881.4 <sup>a</sup> | 1882.3 | 1871.1 | 1879.3 | 1885.1 | 1878.1 | 1874.0 | 1870.9 | 1870.8 | 1870.2 | 1870.2 | 1870.2 |
| gdb 3991 | 1865.2 <sup>a</sup> | 1867.7 | 1852.9 | 1864.2 | 1870.1 | 1863.8 | 1857.8 | 1856.4 | 1856.3 | 1858.4 | 1858.4 | 1858.4 |
| gdb 3992 | 1871.8 <sup>a</sup> | 1884.0 | 1873.6 | 1880.3 | 1882.2 | 1876.4 | 1874.7 | 1872.2 | 1872.1 | 1875.7 | 1875.7 | 1875.7 |
| gdb 3993 | 1882.1 <sup>a</sup> | 1907.4 | 1889.6 | 1901.6 | 1903.8 | 1895.9 | 1886.6 | 1890.0 | 1889.9 | 1891.4 | 1891.4 | 1891.4 |
| gdb 3994 | 1880.2 <sup>a</sup> | 1907.3 | 1886.3 | 1898.5 | 1897.9 | 1891.0 | 1886.4 | 1887.7 | 1887.7 | 1888.7 | 1888.6 | 1888.6 |
| gdb 3995 | 1877.2 <sup>a</sup> | 1892.5 | 1869.4 | 1885.9 | 1890.2 | 1882.3 | 1872.5 | 1877.5 | 1877.5 | 1876.3 | 1876.3 | 1876.3 |
| gdb 3996 | 1852.4 <sup>a</sup> | 1866.2 | 1840.7 | 1855.3 | 1866.4 | 1858.2 | 1845.1 | 1850.7 | 1850.7 | 1846.1 | 1846.1 | 1846.1 |
| gdb 3997 | 1851.5 <sup>a</sup> | 1863.9 | 1835.2 | 1851.0 | 1862.4 | 1850.0 | 1839.1 | 1842.7 | 1842.6 | 1842.1 | 1842.1 | 1842.1 |
| gdb 3998 | 1849.0 <sup>a</sup> | 1852.3 | 1821.8 | 1840.4 | 1853.2 | 1845.3 | 1831.6 | 1839.4 | 1839.4 | 1832.1 | 1832.1 | 1832.1 |
| gdb 3999 | 1851.7 <sup>a</sup> | 1877.0 | 1853.0 | 1865.0 | 1873.5 | 1860.8 | 1849.9 | 1851.2 | 1851.2 | 1853.6 | 1853.5 | 1853.5 |
| gdb 4000 | 1875.4 <sup>a</sup> | 1879.8 | 1868.8 | 1879.4 | 1880.2 | 1874.8 | 1871.0 | 1874.5 | 1874.5 | 1876.2 | 1876.2 | 1876.2 |
| gdb 4001 | 1874.8 <sup>a</sup> | 1881.2 | 1865.2 | 1876.9 | 1875.4 | 1871.5 | 1869.8 | 1870.1 | 1870.1 | 1873.0 | 1873.0 | 1873.0 |
| gdb 4002 | 1870.5 <sup>a</sup> | 1864.4 | 1848.7 | 1863.6 | 1868.8 | 1863.0 | 1860.1 | 1860.1 | 1860.1 | 1860.0 | 1860.0 | 1860.0 |
| gdb 4003 | 1842.9 <sup>a</sup> | 1857.9 | 1822.5 | 1842.0 | 1855.6 | 1842.5 | 1824.9 | 1824.9 | 1824.9 | 1823.1 | 1823.1 | 1823.1 |
| gdb 4004 | 1841.0 <sup>a</sup> | 1859.0 | 1825.9 | 1842.5 | 1856.4 | 1842.1 | 1826.2 | 1826.6 | 1826.6 | 1823.7 | 1823.6 | 1823.6 |

... continued on next page ...

Table S26: ... continued from previous page ...

| Molecule | Ref.                | MNDO   | AMI    | PM3    | PM6    | PM7    | OM1    | OM2    |        | OM3    |        | OM3    | D3T    |
|----------|---------------------|--------|--------|--------|--------|--------|--------|--------|--------|--------|--------|--------|--------|
|          |                     |        |        |        |        |        |        | D2     | D3     | D2     | D3     |        |        |
| gdb 4005 | 1851.6 <sup>a</sup> | 1874.1 | 1841.8 | 1855.7 | 1865.9 | 1854.2 | 1843.8 | 1841.1 | 1841.1 | 1840.9 | 1840.9 | 1840.9 | 1840.9 |
| gdb 4006 | 1847.6 <sup>a</sup> | 1874.8 | 1844.3 | 1856.4 | 1865.5 | 1852.4 | 1843.4 | 1841.5 | 1841.5 | 1840.0 | 1840.0 | 1840.0 | 1840.0 |
| gdb 4007 | 1881.1 <sup>a</sup> | 1885.9 | 1873.4 | 1883.0 | 1890.7 | 1883.9 | 1878.6 | 1882.8 | 1882.8 | 1885.1 | 1885.1 | 1885.1 | 1885.1 |
| gdb 4008 | 1874.8 <sup>a</sup> | 1869.5 | 1852.8 | 1866.9 | 1879.3 | 1871.8 | 1861.9 | 1867.4 | 1867.4 | 1868.0 | 1868.0 | 1868.0 | 1868.0 |
| gdb 4009 | 1887.3 <sup>a</sup> | 1898.6 | 1887.6 | 1892.2 | 1899.0 | 1892.3 | 1881.2 | 1885.6 | 1885.6 | 1882.8 | 1882.8 | 1882.8 | 1882.8 |
| gdb 4010 | 1889.3 <sup>a</sup> | 1911.6 | 1903.6 | 1904.0 | 1906.9 | 1900.9 | 1894.4 | 1895.3 | 1895.2 | 1895.0 | 1895.0 | 1895.0 | 1895.0 |
| gdb 4011 | 1851.1 <sup>a</sup> | 1868.0 | 1835.4 | 1852.5 | 1860.9 | 1852.9 | 1842.3 | 1845.7 | 1845.7 | 1838.1 | 1838.1 | 1838.1 | 1838.1 |
| gdb 4012 | 1849.8 <sup>a</sup> | 1864.9 | 1830.4 | 1849.4 | 1862.7 | 1851.5 | 1836.7 | 1840.1 | 1840.1 | 1836.5 | 1836.5 | 1836.5 | 1836.5 |
| gdb 4013 | 1854.5 <sup>a</sup> | 1882.1 | 1855.2 | 1867.9 | 1874.8 | 1866.3 | 1856.0 | 1857.6 | 1857.6 | 1852.8 | 1852.8 | 1852.8 | 1852.8 |
| gdb 4014 | 1853.2 <sup>a</sup> | 1878.7 | 1847.0 | 1872.9 | 1879.8 | 1861.9 | 1850.7 | 1849.7 | 1849.7 | 1848.9 | 1848.9 | 1848.9 | 1848.9 |
| gdb 4015 | 1912.1 <sup>a</sup> | 1923.9 | 1913.7 | 1921.0 | 1923.1 | 1915.7 | 1911.1 | 1914.6 | 1914.6 | 1912.0 | 1912.0 | 1912.0 | 1912.0 |
| gdb 4016 | 1893.1 <sup>a</sup> | 1914.9 | 1902.9 | 1909.4 | 1911.4 | 1906.8 | 1900.7 | 1905.9 | 1905.9 | 1904.3 | 1904.2 | 1904.2 | 1904.2 |
| gdb 4017 | 1897.1 <sup>a</sup> | 1912.6 | 1898.5 | 1906.9 | 1909.4 | 1904.5 | 1897.7 | 1901.0 | 1901.0 | 1900.2 | 1900.2 | 1900.2 | 1900.2 |
| gdb 4018 | 1901.9 <sup>a</sup> | 1926.4 | 1918.4 | 1922.2 | 1923.0 | 1917.8 | 1911.9 | 1913.9 | 1913.8 | 1915.6 | 1915.6 | 1915.6 | 1915.6 |
| gdb 4019 | 1874.7 <sup>a</sup> | 1876.3 | 1857.1 | 1868.5 | 1880.9 | 1870.4 | 1856.8 | 1862.8 | 1862.8 | 1862.7 | 1862.7 | 1862.7 | 1862.7 |
| gdb 4020 | 1873.1 <sup>a</sup> | 1878.2 | 1857.5 | 1869.4 | 1877.3 | 1867.1 | 1859.3 | 1865.5 | 1865.5 | 1865.6 | 1865.6 | 1865.6 | 1865.6 |
| gdb 4021 | 1865.1 <sup>a</sup> | 1864.2 | 1840.3 | 1855.2 | 1869.2 | 1859.3 | 1843.4 | 1853.1 | 1853.1 | 1850.0 | 1850.0 | 1850.0 | 1850.0 |
| gdb 4022 | 1880.2 <sup>a</sup> | 1890.2 | 1873.7 | 1881.6 | 1886.6 | 1876.6 | 1871.5 | 1873.9 | 1873.9 | 1876.9 | 1876.9 | 1876.9 | 1876.9 |
| gdb 4023 | 1862.1 <sup>a</sup> | 1866.2 | 1850.1 | 1857.9 | 1873.6 | 1862.9 | 1847.2 | 1850.4 | 1850.4 | 1847.4 | 1847.4 | 1847.4 | 1847.4 |
| gdb 4024 | 1869.5 <sup>a</sup> | 1875.4 | 1862.7 | 1867.5 | 1884.8 | 1874.5 | 1860.2 | 1867.9 | 1867.9 | 1861.3 | 1861.2 | 1861.2 | 1861.2 |
| gdb 4025 | 1871.2 <sup>a</sup> | 1877.1 | 1865.1 | 1868.1 | 1883.2 | 1872.0 | 1859.4 | 1859.9 | 1859.9 | 1860.1 | 1860.1 | 1860.1 | 1860.1 |
| gdb 4026 | 1864.7 <sup>a</sup> | 1855.7 | 1835.6 | 1850.2 | 1867.7 | 1855.3 | 1842.8 | 1852.8 | 1852.8 | 1846.6 | 1846.6 | 1846.6 | 1846.6 |
| gdb 4027 | 1865.7 <sup>a</sup> | 1868.9 | 1853.7 | 1864.4 | 1878.1 | 1865.9 | 1854.9 | 1863.0 | 1863.0 | 1859.4 | 1859.4 | 1859.4 | 1859.4 |
| gdb 4028 | 1875.5 <sup>a</sup> | 1873.7 | 1857.3 | 1868.2 | 1881.2 | 1871.0 | 1859.4 | 1865.8 | 1865.8 | 1865.1 | 1865.1 | 1865.1 | 1865.1 |
| gdb 4029 | 1873.3 <sup>a</sup> | 1874.8 | 1856.6 | 1869.0 | 1877.9 | 1868.1 | 1860.7 | 1868.6 | 1868.6 | 1866.7 | 1866.7 | 1866.7 | 1866.7 |
| gdb 4030 | 1865.5 <sup>a</sup> | 1860.0 | 1839.1 | 1854.7 | 1869.1 | 1859.3 | 1844.0 | 1854.8 | 1854.8 | 1851.1 | 1851.1 | 1851.1 | 1851.1 |
| gdb 4031 | 1883.3 <sup>a</sup> | 1889.2 | 1873.9 | 1880.3 | 1887.0 | 1878.0 | 1876.6 | 1879.0 | 1879.0 | 1879.8 | 1879.8 | 1879.8 | 1879.8 |
| gdb 4032 | 1841.4 <sup>a</sup> | 1827.3 | 1809.3 | 1822.9 | 1844.5 | 1830.1 | 1815.6 | 1828.2 | 1828.2 | 1823.8 | 1823.8 | 1823.8 | 1823.8 |
| gdb 4033 | 1837.5 <sup>a</sup> | 1825.2 | 1802.3 | 1819.3 | 1837.3 | 1824.3 | 1813.0 | 1825.9 | 1825.9 | 1821.7 | 1821.7 | 1821.7 | 1821.7 |
| gdb 4034 | 1848.2 <sup>a</sup> | 1837.3 | 1812.1 | 1828.6 | 1846.4 | 1835.3 | 1822.5 | 1835.8 | 1835.8 | 1828.9 | 1828.9 | 1828.9 | 1828.9 |
| gdb 4035 | 1847.7 <sup>a</sup> | 1847.4 | 1829.1 | 1838.9 | 1858.2 | 1841.9 | 1832.8 | 1841.3 | 1841.3 | 1839.4 | 1839.4 | 1839.4 | 1839.4 |
| gdb 4036 | 1845.1 <sup>a</sup> | 1846.6 | 1826.1 | 1838.7 | 1851.2 | 1839.5 | 1830.7 | 1840.1 | 1840.1 | 1838.5 | 1838.5 | 1838.5 | 1838.5 |
| gdb 4037 | 1855.9 <sup>a</sup> | 1855.6 | 1833.6 | 1846.3 | 1861.3 | 1850.6 | 1840.9 | 1851.1 | 1851.1 | 1847.0 | 1847.0 | 1847.0 | 1847.0 |
| gdb 4038 | 1871.4 <sup>a</sup> | 1877.9 | 1858.5 | 1868.9 | 1879.7 | 1869.1 | 1855.9 | 1860.9 | 1860.9 | 1860.5 | 1860.5 | 1860.5 | 1860.5 |
| gdb 4039 | 1868.5 <sup>a</sup> | 1876.2 | 1852.8 | 1865.0 | 1870.6 | 1860.4 | 1852.9 | 1856.5 | 1856.5 | 1857.0 | 1856.9 | 1856.9 | 1856.9 |
| gdb 4040 | 1870.1 <sup>a</sup> | 1877.2 | 1855.3 | 1868.0 | 1874.2 | 1864.0 | 1856.5 | 1862.1 | 1862.1 | 1862.3 | 1862.3 | 1862.3 | 1862.3 |
| gdb 4041 | 1862.1 <sup>a</sup> | 1865.9 | 1841.5 | 1855.4 | 1867.7 | 1857.9 | 1842.2 | 1850.8 | 1850.8 | 1847.6 | 1847.6 | 1847.6 | 1847.6 |
| gdb 4042 | 1876.9 <sup>a</sup> | 1890.8 | 1872.8 | 1880.7 | 1885.6 | 1875.9 | 1870.5 | 1871.5 | 1871.5 | 1874.5 | 1874.5 | 1874.5 | 1874.5 |
| gdb 4043 | 1876.0 <sup>a</sup> | 1891.5 | 1888.6 | 1888.3 | 1898.9 | 1890.3 | 1877.3 | 1886.1 | 1886.1 | 1879.8 | 1879.8 | 1879.8 | 1879.8 |
| gdb 4044 | 1883.9 <sup>a</sup> | 1885.4 | 1881.4 | 1883.3 | 1894.5 | 1887.7 | 1873.4 | 1881.7 | 1881.7 | 1877.6 | 1877.6 | 1877.6 | 1877.6 |
| gdb 4045 | 1895.5 <sup>a</sup> | 1899.1 | 1899.0 | 1896.0 | 1906.4 | 1899.0 | 1889.6 | 1893.7 | 1893.7 | 1892.6 | 1892.6 | 1892.6 | 1892.6 |
| gdb 4046 | 1862.2 <sup>a</sup> | 1856.1 | 1824.0 | 1841.2 | 1857.6 | 1842.5 | 1839.6 | 1847.4 | 1847.4 | 1846.4 | 1846.4 | 1846.4 | 1846.4 |
| gdb 4047 | 1870.1 <sup>a</sup> | 1860.0 | 1825.8 | 1844.2 | 1857.5 | 1842.2 | 1831.6 | 1850.1 | 1850.1 | 1849.3 | 1849.3 | 1849.3 | 1849.3 |
| gdb 4048 | 1856.9 <sup>a</sup> | 1846.4 | 1812.5 | 1833.7 | 1853.5 | 1837.8 | 1828.9 | 1842.9 | 1842.9 | 1838.4 | 1838.4 | 1838.4 | 1838.4 |
| gdb 4049 | 1875.8 <sup>a</sup> | 1870.9 | 1841.1 | 1855.8 | 1865.4 | 1850.8 | 1851.4 | 1856.2 | 1856.2 | 1858.8 | 1858.8 | 1858.8 | 1858.8 |

... continued on next page ...

Table S26: . . . continued from previous page. . . .

| Molecule | Ref.                | MNDO   | AMI    | PM3    | PM6    | PM7    | OM1    |        | OM2    |        | OM3    |        | OM3    |        | D3T    |
|----------|---------------------|--------|--------|--------|--------|--------|--------|--------|--------|--------|--------|--------|--------|--------|--------|
|          |                     |        |        |        |        |        | PM3    | PM6    | OM1    | OM2    | OM3    | OM3    | D2     | D3     |        |
| gdb 4050 | 1839.3 <sup>a</sup> | 1823.9 | 1797.2 | 1812.3 | 1834.4 | 1819.6 | 1814.4 | 1826.9 | 1826.9 | 1826.9 | 1826.9 | 1821.4 | 1821.4 | 1821.4 | 1821.4 |
| gdb 4051 | 1843.4 <sup>a</sup> | 1823.1 | 1795.6 | 1811.3 | 1832.0 | 1816.2 | 1813.5 | 1826.8 | 1826.8 | 1826.8 | 1826.8 | 1821.5 | 1821.4 | 1821.4 | 1821.4 |
| gdb 4052 | 1849.3 <sup>a</sup> | 1838.4 | 1817.0 | 1828.1 | 1849.7 | 1835.1 | 1829.1 | 1838.2 | 1838.2 | 1838.2 | 1838.2 | 1836.2 | 1836.2 | 1836.2 | 1836.2 |
| gdb 4053 | 1859.2 <sup>a</sup> | 1852.1 | 1823.5 | 1839.1 | 1854.6 | 1839.8 | 1838.1 | 1846.0 | 1846.0 | 1846.0 | 1846.0 | 1844.4 | 1844.4 | 1844.4 | 1844.4 |
| gdb 4054 | 1861.7 <sup>a</sup> | 1855.1 | 1825.2 | 1842.0 | 1855.0 | 1840.6 | 1839.6 | 1847.0 | 1847.0 | 1847.0 | 1847.0 | 1845.7 | 1845.7 | 1845.7 | 1845.7 |
| gdb 4055 | 1868.2 <sup>a</sup> | 1856.9 | 1825.0 | 1843.6 | 1857.4 | 1843.1 | 1840.7 | 1850.7 | 1850.7 | 1850.7 | 1850.7 | 1849.0 | 1849.0 | 1849.0 | 1849.0 |
| gdb 4056 | 1854.6 <sup>a</sup> | 1843.3 | 1812.1 | 1831.4 | 1850.7 | 1835.2 | 1827.4 | 1841.2 | 1841.1 | 1841.1 | 1841.1 | 1836.2 | 1836.2 | 1836.2 | 1836.2 |
| gdb 4057 | 1871.3 <sup>a</sup> | 1866.9 | 1839.3 | 1854.3 | 1862.7 | 1849.2 | 1852.9 | 1855.3 | 1855.3 | 1855.3 | 1855.3 | 1857.1 | 1857.1 | 1857.1 | 1857.1 |
| gdb 4058 | 1882.5 <sup>a</sup> | 1870.8 | 1858.3 | 1867.8 | 1882.0 | 1872.4 | 1863.0 | 1876.8 | 1876.8 | 1876.8 | 1876.8 | 1870.3 | 1870.3 | 1870.3 | 1870.3 |
| gdb 4059 | 1882.1 <sup>a</sup> | 1870.4 | 1858.0 | 1867.3 | 1882.2 | 1873.0 | 1862.6 | 1877.0 | 1877.0 | 1877.0 | 1877.0 | 1870.7 | 1870.7 | 1870.7 | 1870.7 |
| gdb 4060 | 1887.6 <sup>a</sup> | 1881.4 | 1870.6 | 1876.4 | 1887.2 | 1878.1 | 1874.1 | 1881.9 | 1881.9 | 1881.9 | 1881.9 | 1878.7 | 1878.7 | 1878.7 | 1878.7 |
| gdb 4061 | 1888.2 <sup>a</sup> | 1882.0 | 1873.6 | 1878.4 | 1890.7 | 1881.6 | 1874.6 | 1884.2 | 1884.2 | 1884.2 | 1884.2 | 1881.5 | 1881.5 | 1881.5 | 1881.5 |
| gdb 4062 | 1851.8 <sup>a</sup> | 1845.7 | 1821.7 | 1834.2 | 1855.1 | 1838.8 | 1830.1 | 1839.3 | 1839.3 | 1839.3 | 1839.3 | 1834.8 | 1834.8 | 1834.8 | 1834.8 |
| gdb 4063 | 1862.7 <sup>a</sup> | 1856.0 | 1830.9 | 1843.3 | 1862.3 | 1847.9 | 1841.3 | 1848.3 | 1848.3 | 1848.3 | 1848.3 | 1842.0 | 1842.0 | 1842.0 | 1842.0 |
| gdb 4064 | 1857.9 <sup>a</sup> | 1854.0 | 1833.4 | 1840.4 | 1860.0 | 1843.8 | 1841.7 | 1845.3 | 1845.3 | 1845.3 | 1845.3 | 1844.4 | 1844.4 | 1844.4 | 1844.4 |
| gdb 4065 | 1855.4 <sup>a</sup> | 1866.9 | 1841.7 | 1855.2 | 1867.9 | 1859.8 | 1846.9 | 1852.6 | 1852.6 | 1852.6 | 1852.6 | 1847.6 | 1847.6 | 1847.6 | 1847.6 |
| gdb 4066 | 1859.6 <sup>a</sup> | 1867.7 | 1837.0 | 1853.5 | 1865.4 | 1852.6 | 1842.2 | 1845.2 | 1845.2 | 1845.2 | 1845.2 | 1845.1 | 1845.1 | 1845.1 | 1845.1 |
| gdb 4067 | 1848.9 <sup>a</sup> | 1852.1 | 1821.7 | 1840.3 | 1853.2 | 1845.1 | 1831.0 | 1838.8 | 1838.8 | 1838.8 | 1838.8 | 1831.6 | 1831.6 | 1831.6 | 1831.6 |
| gdb 4068 | 1861.5 <sup>a</sup> | 1881.6 | 1853.8 | 1865.9 | 1872.9 | 1861.9 | 1855.8 | 1855.2 | 1855.2 | 1855.2 | 1855.2 | 1857.5 | 1857.5 | 1857.5 | 1857.5 |
| gdb 4069 | 1853.4 <sup>a</sup> | 1862.7 | 1841.3 | 1854.2 | 1865.8 | 1857.8 | 1846.3 | 1853.1 | 1853.1 | 1853.1 | 1853.1 | 1847.2 | 1847.2 | 1847.2 | 1847.2 |
| gdb 4070 | 1850.8 <sup>a</sup> | 1861.9 | 1837.0 | 1852.4 | 1860.4 | 1853.2 | 1845.2 | 1850.9 | 1850.9 | 1850.9 | 1850.9 | 1845.0 | 1845.0 | 1845.0 | 1845.0 |
| gdb 4071 | 1863.1 <sup>a</sup> | 1867.6 | 1839.1 | 1854.6 | 1866.4 | 1855.2 | 1847.2 | 1852.9 | 1852.9 | 1852.9 | 1852.9 | 1850.3 | 1850.3 | 1850.3 | 1850.3 |
| gdb 4072 | 1846.3 <sup>a</sup> | 1847.7 | 1820.9 | 1838.7 | 1850.7 | 1842.9 | 1830.1 | 1839.2 | 1839.2 | 1839.2 | 1839.2 | 1831.0 | 1831.0 | 1831.0 | 1831.0 |
| gdb 4073 | 1865.1 <sup>a</sup> | 1880.0 | 1853.5 | 1865.4 | 1872.9 | 1862.8 | 1858.1 | 1860.0 | 1860.0 | 1860.0 | 1860.0 | 1859.8 | 1859.8 | 1859.8 | 1859.8 |
| gdb 4074 | 1870.4 <sup>a</sup> | 1871.6 | 1854.6 | 1863.2 | 1874.1 | 1867.3 | 1862.3 | 1868.2 | 1868.2 | 1868.2 | 1868.2 | 1860.6 | 1860.6 | 1860.6 | 1860.6 |
| gdb 4075 | 1829.0 <sup>a</sup> | 1817.2 | 1803.4 | 1811.8 | 1832.8 | 1819.8 | 1813.4 | 1821.9 | 1821.9 | 1821.9 | 1821.9 | 1818.2 | 1818.2 | 1818.2 | 1818.2 |
| gdb 4076 | 1874.1 <sup>a</sup> | 1880.3 | 1868.6 | 1873.1 | 1881.7 | 1874.7 | 1868.9 | 1871.2 | 1871.2 | 1871.2 | 1871.2 | 1867.5 | 1867.5 | 1867.5 | 1867.5 |
| gdb 4077 | 1869.7 <sup>a</sup> | 1881.1 | 1862.1 | 1871.2 | 1883.9 | 1874.1 | 1863.0 | 1868.1 | 1868.1 | 1868.1 | 1868.1 | 1863.7 | 1863.7 | 1863.7 | 1863.7 |
| gdb 4078 | 1874.3 <sup>a</sup> | 1880.2 | 1861.0 | 1869.7 | 1877.2 | 1872.0 | 1865.9 | 1868.8 | 1868.8 | 1868.8 | 1868.8 | 1861.7 | 1861.7 | 1861.7 | 1861.7 |
| gdb 4079 | 1868.9 <sup>a</sup> | 1893.3 | 1874.9 | 1884.2 | 1886.5 | 1878.2 | 1873.4 | 1874.0 | 1874.0 | 1874.0 | 1874.0 | 1871.9 | 1871.9 | 1871.9 | 1871.9 |
| gdb 4080 | 1878.0 <sup>a</sup> | 1893.7 | 1880.5 | 1885.2 | 1890.7 | 1884.7 | 1878.9 | 1879.9 | 1879.9 | 1879.9 | 1879.9 | 1875.6 | 1875.6 | 1875.6 | 1875.6 |
| gdb 4081 | 1885.6 <sup>a</sup> | 1887.2 | 1880.8 | 1882.1 | 1894.3 | 1886.0 | 1880.6 | 1888.6 | 1888.6 | 1888.6 | 1888.6 | 1884.0 | 1884.0 | 1884.0 | 1884.0 |
| gdb 4082 | 1880.3 <sup>a</sup> | 1885.9 | 1878.8 | 1881.7 | 1890.2 | 1882.0 | 1873.8 | 1881.9 | 1881.9 | 1881.9 | 1881.9 | 1878.0 | 1878.0 | 1878.0 | 1878.0 |
| gdb 4083 | 1889.5 <sup>a</sup> | 1899.0 | 1893.3 | 1891.0 | 1897.5 | 1889.8 | 1889.6 | 1893.2 | 1893.2 | 1893.2 | 1893.2 | 1890.7 | 1890.7 | 1890.7 | 1890.7 |
| gdb 4084 | 1889.6 <sup>a</sup> | 1897.9 | 1893.3 | 1891.6 | 1898.3 | 1890.4 | 1888.2 | 1891.1 | 1891.1 | 1891.1 | 1891.1 | 1889.9 | 1889.9 | 1889.9 | 1889.9 |
| gdb 4085 | 1877.6 <sup>a</sup> | 1869.4 | 1853.8 | 1863.6 | 1878.1 | 1867.2 | 1858.9 | 1871.7 | 1871.7 | 1871.7 | 1871.7 | 1866.7 | 1866.7 | 1866.7 | 1866.7 |
| gdb 4086 | 1885.2 <sup>a</sup> | 1881.5 | 1867.4 | 1873.7 | 1882.9 | 1873.3 | 1871.3 | 1878.4 | 1878.4 | 1878.4 | 1878.4 | 1876.3 | 1876.3 | 1876.3 | 1876.3 |
| gdb 4087 | 1853.5 <sup>a</sup> | 1874.2 | 1844.0 | 1860.5 | 1872.5 | 1859.4 | 1841.8 | 1844.4 | 1844.4 | 1844.4 | 1844.4 | 1839.5 | 1839.5 | 1839.5 | 1839.5 |
| gdb 4088 | 1853.4 <sup>a</sup> | 1874.2 | 1844.0 | 1860.2 | 1871.6 | 1858.8 | 1841.3 | 1843.9 | 1843.9 | 1843.9 | 1843.9 | 1838.8 | 1838.8 | 1838.8 | 1838.8 |
| gdb 4089 | 1854.4 <sup>a</sup> | 1887.6 | 1860.2 | 1872.3 | 1879.5 | 1867.5 | 1854.7 | 1854.0 | 1854.0 | 1854.0 | 1854.0 | 1851.3 | 1851.3 | 1851.3 | 1851.3 |
| gdb 4090 | 1854.6 <sup>a</sup> | 1887.8 | 1862.6 | 1874.7 | 1882.6 | 1870.0 | 1854.0 | 1854.6 | 1854.6 | 1854.6 | 1854.6 | 1852.2 | 1852.2 | 1852.2 | 1852.2 |
| gdb 4091 | 1885.8 <sup>a</sup> | 1897.6 | 1884.1 | 1889.4 | 1895.4 | 1888.4 | 1880.6 | 1883.3 | 1883.3 | 1883.3 | 1883.3 | 1880.8 | 1880.8 | 1880.8 | 1880.8 |
| gdb 4092 | 1888.9 <sup>a</sup> | 1910.9 | 1900.9 | 1901.6 | 1903.6 | 1898.0 | 1894.3 | 1893.9 | 1893.9 | 1893.9 | 1893.9 | 1893.6 | 1893.6 | 1893.6 | 1893.6 |
| gdb 4093 | 1894.7 <sup>a</sup> | 1881.8 | 1885.6 | 1885.9 | 1895.0 | 1891.4 | 1883.5 | 1895.7 | 1895.7 | 1895.7 | 1895.7 | 1891.6 | 1891.6 | 1891.6 | 1891.6 |
| gdb 4094 | 1899.3 <sup>a</sup> | 1894.9 | 1895.7 | 1895.7 | 1896.0 | 1894.3 | 1895.2 | 1899.0 | 1899.0 | 1899.0 | 1899.0 | 1898.0 | 1898.0 | 1898.0 | 1898.0 |

. . . continued on next page . . .

Table S26: ... continued from previous page. ...

| Molecule | Ref.                | MNDO   | AMI    | PM3    | PM6    | PM7    | OM1    |        | OM2    |        | OM3    |        | D3T    |
|----------|---------------------|--------|--------|--------|--------|--------|--------|--------|--------|--------|--------|--------|--------|
|          |                     |        |        |        |        |        | OM1    | OM2    | OM3    | OM3    | D2     | D3     |        |
| gdb 4095 | 1887.9 <sup>a</sup> | 1898.7 | 1884.2 | 1891.4 | 1896.8 | 1891.2 | 1881.8 | 1887.9 | 1887.9 | 1887.9 | 1884.6 | 1884.6 | 1884.6 |
| gdb 4096 | 1892.7 <sup>a</sup> | 1912.4 | 1904.2 | 1906.5 | 1909.0 | 1903.5 | 1896.8 | 1899.5 | 1899.5 | 1899.5 | 1898.9 | 1898.9 | 1898.9 |
| gdb 4097 | 1878.3 <sup>a</sup> | 1895.8 | 1883.2 | 1885.8 | 1894.6 | 1887.5 | 1872.7 | 1876.2 | 1876.2 | 1876.2 | 1870.9 | 1870.9 | 1870.9 |
| gdb 4098 | 1881.1 <sup>a</sup> | 1909.4 | 1899.2 | 1896.6 | 1902.2 | 1896.3 | 1888.7 | 1887.5 | 1887.5 | 1887.5 | 1884.5 | 1884.5 | 1884.5 |
| gdb 4099 | 1886.4 <sup>a</sup> | 1907.4 | 1888.2 | 1902.4 | 1905.4 | 1897.1 | 1888.8 | 1891.8 | 1891.8 | 1891.8 | 1892.5 | 1892.5 | 1892.5 |
| gdb 4100 | 1885.5 <sup>a</sup> | 1908.1 | 1885.0 | 1900.0 | 1900.8 | 1893.4 | 1887.0 | 1892.1 | 1892.1 | 1892.1 | 1892.4 | 1892.4 | 1892.4 |
| gdb 4101 | 1901.0 <sup>a</sup> | 1900.8 | 1877.3 | 1895.3 | 1903.8 | 1893.9 | 1883.1 | 1890.0 | 1890.0 | 1890.0 | 1887.5 | 1887.5 | 1887.5 |
| gdb 4102 | 1883.1 <sup>a</sup> | 1894.1 | 1870.5 | 1888.4 | 1896.8 | 1887.6 | 1874.6 | 1882.6 | 1882.6 | 1882.6 | 1881.3 | 1881.3 | 1881.3 |
| gdb 4103 | 1900.0 <sup>a</sup> | 1913.8 | 1902.1 | 1909.5 | 1916.0 | 1908.8 | 1902.5 | 1908.1 | 1908.1 | 1908.1 | 1907.1 | 1907.1 | 1907.1 |
| gdb 4104 | 1897.2 <sup>a</sup> | 1913.0 | 1900.2 | 1908.0 | 1911.6 | 1905.2 | 1900.3 | 1905.6 | 1905.6 | 1905.6 | 1904.4 | 1904.4 | 1904.4 |
| gdb 4105 | 1921.5 <sup>a</sup> | 1917.0 | 1904.9 | 1913.4 | 1918.6 | 1910.8 | 1906.1 | 1907.8 | 1907.8 | 1907.8 | 1906.9 | 1906.8 | 1906.8 |
| gdb 4106 | 1903.2 <sup>a</sup> | 1922.7 | 1915.6 | 1919.0 | 1922.0 | 1915.0 | 1908.5 | 1910.5 | 1910.5 | 1910.5 | 1913.0 | 1913.0 | 1913.0 |
| gdb 4107 | 1914.0 <sup>a</sup> | 1924.9 | 1914.4 | 1922.9 | 1926.1 | 1919.2 | 1914.2 | 1918.6 | 1918.6 | 1918.6 | 1915.9 | 1915.9 | 1915.9 |
| gdb 4108 | 1914.7 <sup>a</sup> | 1924.7 | 1914.3 | 1922.9 | 1926.2 | 1919.2 | 1914.0 | 1918.4 | 1918.4 | 1918.4 | 1916.0 | 1916.0 | 1916.0 |
| gdb 4109 | 1901.5 <sup>a</sup> | 1913.7 | 1902.7 | 1910.5 | 1917.3 | 1911.1 | 1902.4 | 1907.2 | 1907.2 | 1907.2 | 1906.8 | 1906.8 | 1906.8 |
| gdb 4110 | 1902.4 <sup>a</sup> | 1926.3 | 1918.0 | 1921.5 | 1923.8 | 1918.4 | 1914.3 | 1915.9 | 1915.9 | 1915.9 | 1917.7 | 1917.6 | 1917.6 |
| gdb 4111 | 1870.5 <sup>a</sup> | 1882.7 | 1864.9 | 1871.7 | 1884.1 | 1872.8 | 1867.9 | 1872.6 | 1872.6 | 1872.6 | 1870.3 | 1870.3 | 1870.3 |
| gdb 4112 | 1869.7 <sup>a</sup> | 1879.1 | 1863.4 | 1869.8 | 1879.2 | 1871.2 | 1863.1 | 1868.0 | 1868.0 | 1868.0 | 1865.5 | 1865.5 | 1865.5 |
| gdb 4113 | 1877.2 <sup>a</sup> | 1898.0 | 1883.8 | 1886.5 | 1891.2 | 1884.3 | 1878.2 | 1880.1 | 1880.1 | 1880.1 | 1880.8 | 1880.7 | 1880.8 |
| gdb 4114 | 1888.2 <sup>a</sup> | 1903.2 | 1886.1 | 1892.8 | 1900.8 | 1894.5 | 1887.7 | 1895.1 | 1895.1 | 1895.1 | 1893.4 | 1893.3 | 1893.3 |
| gdb 4115 | 1892.5 <sup>a</sup> | 1894.1 | 1885.6 | 1892.0 | 1898.0 | 1892.0 | 1886.4 | 1893.4 | 1893.4 | 1893.4 | 1891.6 | 1891.5 | 1891.6 |
| gdb 4116 | 1898.5 <sup>a</sup> | 1906.5 | 1901.3 | 1903.3 | 1908.6 | 1902.5 | 1899.6 | 1902.1 | 1902.1 | 1902.1 | 1903.8 | 1903.8 | 1903.8 |
| gdb 4117 | 1896.3 <sup>a</sup> | 1892.0 | 1895.3 | 1892.4 | 1905.5 | 1899.4 | 1888.9 | 1902.0 | 1902.0 | 1902.0 | 1892.1 | 1892.1 | 1892.1 |
| gdb 4118 | 1894.3 <sup>a</sup> | 1887.3 | 1891.6 | 1887.4 | 1903.0 | 1897.8 | 1887.2 | 1899.4 | 1899.4 | 1899.4 | 1890.0 | 1889.9 | 1889.9 |
| gdb 4119 | 1898.5 <sup>a</sup> | 1898.1 | 1901.5 | 1896.5 | 1907.9 | 1903.1 | 1895.7 | 1903.2 | 1903.2 | 1903.2 | 1899.1 | 1899.1 | 1899.1 |
| gdb 4120 | 1895.9 <sup>a</sup> | 1894.9 | 1887.8 | 1894.2 | 1901.1 | 1897.2 | 1889.6 | 1897.5 | 1897.5 | 1897.5 | 1894.7 | 1894.7 | 1894.7 |
| gdb 4121 | 1893.6 <sup>a</sup> | 1894.4 | 1890.0 | 1896.0 | 1903.6 | 1899.7 | 1891.6 | 1901.1 | 1901.1 | 1901.1 | 1898.2 | 1898.2 | 1898.2 |
| gdb 4122 | 1903.0 <sup>a</sup> | 1908.3 | 1904.4 | 1906.0 | 1908.4 | 1905.3 | 1902.9 | 1907.0 | 1907.0 | 1907.0 | 1907.0 | 1907.0 | 1907.0 |
| gdb 4123 | 1880.4 <sup>a</sup> | 1892.0 | 1887.4 | 1884.8 | 1898.5 | 1891.7 | 1878.7 | 1881.2 | 1881.2 | 1881.2 | 1878.1 | 1878.1 | 1878.1 |
| gdb 4124 | 1870.6 <sup>a</sup> | 1890.7 | 1872.0 | 1885.0 | 1885.1 | 1879.5 | 1872.2 | 1873.2 | 1873.2 | 1873.2 | 1871.8 | 1871.8 | 1871.8 |
| gdb 4125 | 1873.7 <sup>a</sup> | 1890.6 | 1872.8 | 1885.6 | 1887.1 | 1881.1 | 1873.4 | 1874.5 | 1874.5 | 1874.5 | 1873.5 | 1873.5 | 1873.5 |
| gdb 4126 | 1875.6 <sup>a</sup> | 1903.8 | 1890.1 | 1899.3 | 1896.2 | 1890.6 | 1886.6 | 1883.4 | 1883.4 | 1883.4 | 1884.6 | 1884.6 | 1884.6 |
| gdb 4127 | 1897.4 <sup>a</sup> | 1891.6 | 1879.4 | 1892.3 | 1896.0 | 1889.2 | 1883.8 | 1893.8 | 1893.8 | 1893.8 | 1895.3 | 1895.3 | 1895.3 |
| gdb 4128 | 1897.5 <sup>a</sup> | 1891.6 | 1875.2 | 1889.7 | 1890.1 | 1884.0 | 1884.2 | 1891.9 | 1891.9 | 1891.9 | 1893.5 | 1893.5 | 1893.5 |
| gdb 4129 | 1890.8 <sup>a</sup> | 1878.3 | 1860.9 | 1877.9 | 1886.4 | 1879.1 | 1874.1 | 1888.3 | 1888.2 | 1888.2 | 1885.3 | 1885.3 | 1885.3 |
| gdb 4130 | 1887.0 <sup>a</sup> | 1876.0 | 1859.9 | 1876.5 | 1886.0 | 1877.9 | 1870.8 | 1884.9 | 1884.9 | 1884.9 | 1883.5 | 1883.5 | 1883.5 |
| gdb 4131 | 1895.7 <sup>a</sup> | 1885.7 | 1881.0 | 1885.8 | 1896.9 | 1889.1 | 1887.1 | 1900.7 | 1900.7 | 1900.7 | 1895.5 | 1895.5 | 1895.5 |
| gdb 4132 | 1893.5 <sup>a</sup> | 1882.9 | 1880.4 | 1885.1 | 1893.6 | 1889.5 | 1883.0 | 1896.9 | 1896.9 | 1896.9 | 1892.4 | 1892.4 | 1892.4 |
| gdb 4133 | 1892.8 <sup>a</sup> | 1878.5 | 1876.2 | 1882.6 | 1896.1 | 1889.9 | 1880.2 | 1901.4 | 1901.4 | 1901.4 | 1890.4 | 1890.4 | 1890.4 |
| gdb 4134 | 1900.3 <sup>a</sup> | 1897.7 | 1895.8 | 1896.9 | 1901.3 | 1896.0 | 1895.0 | 1902.0 | 1902.0 | 1902.0 | 1901.1 | 1901.1 | 1901.1 |
| gdb 4135 | 1885.1 <sup>a</sup> | 1875.5 | 1861.8 | 1875.4 | 1878.8 | 1874.5 | 1873.8 | 1883.3 | 1883.2 | 1883.2 | 1880.1 | 1880.1 | 1880.1 |
| gdb 4136 | 1884.2 <sup>a</sup> | 1873.5 | 1862.8 | 1874.8 | 1880.3 | 1874.4 | 1871.3 | 1881.4 | 1881.4 | 1881.4 | 1879.3 | 1879.3 | 1879.3 |
| gdb 4137 | 1894.2 <sup>a</sup> | 1889.4 | 1881.0 | 1888.6 | 1886.8 | 1884.0 | 1887.0 | 1890.9 | 1890.9 | 1890.9 | 1891.1 | 1891.1 | 1891.1 |
| gdb 4138 | 1845.1 <sup>a</sup> | 1836.6 | 1811.9 | 1827.1 | 1843.2 | 1832.2 | 1819.9 | 1832.3 | 1832.3 | 1832.3 | 1825.5 | 1825.5 | 1825.5 |
| gdb 4139 | 1840.3 <sup>a</sup> | 1825.7 | 1808.2 | 1822.2 | 1843.2 | 1828.7 | 1814.5 | 1827.1 | 1827.1 | 1827.1 | 1822.6 | 1822.6 | 1822.6 |

... continued on next page ...

Table S26: . . . continued from previous page. . . .

| Molecule | Ref.                | MNDO   | AMI    | PM3    | PM6    | PM7    | OM1    |        | OM2    |        | OM3    |        | D3T    |
|----------|---------------------|--------|--------|--------|--------|--------|--------|--------|--------|--------|--------|--------|--------|
|          |                     |        |        |        |        |        | D2     | D3     | D2     | D3     | D2     | D3     |        |
| gdb 4140 | 1838.8 <sup>a</sup> | 1825.0 | 1804.4 | 1820.3 | 1842.1 | 1827.5 | 1813.6 | 1826.7 | 1826.7 | 1826.7 | 1822.1 | 1822.1 | 1822.1 |
| gdb 4141 | 1850.2 <sup>a</sup> | 1845.3 | 1828.7 | 1840.5 | 1851.9 | 1840.1 | 1828.9 | 1836.6 | 1836.6 | 1836.6 | 1835.2 | 1835.2 | 1835.2 |
| gdb 4142 | 1850.1 <sup>a</sup> | 1846.1 | 1824.0 | 1836.6 | 1848.5 | 1837.4 | 1830.5 | 1836.2 | 1836.2 | 1836.2 | 1834.9 | 1834.9 | 1834.9 |
| gdb 4143 | 1859.0 <sup>a</sup> | 1856.6 | 1835.1 | 1847.2 | 1862.9 | 1852.5 | 1842.5 | 1851.9 | 1851.9 | 1851.9 | 1848.4 | 1848.4 | 1848.4 |
| gdb 4144 | 1884.5 <sup>a</sup> | 1888.4 | 1870.4 | 1884.1 | 1888.8 | 1882.6 | 1879.0 | 1884.2 | 1884.2 | 1884.2 | 1885.5 | 1885.5 | 1885.5 |
| gdb 4145 | 1877.5 <sup>a</sup> | 1872.0 | 1852.4 | 1867.6 | 1875.2 | 1873.2 | 1867.0 | 1876.3 | 1876.3 | 1876.3 | 1871.8 | 1871.8 | 1871.8 |
| gdb 4146 | 1875.5 <sup>a</sup> | 1871.6 | 1852.1 | 1868.0 | 1879.9 | 1872.3 | 1860.6 | 1868.7 | 1868.7 | 1868.7 | 1868.6 | 1868.6 | 1868.6 |
| gdb 4147 | 1847.8 <sup>a</sup> | 1845.8 | 1820.0 | 1833.0 | 1843.4 | 1840.4 | 1835.5 | 1839.5 | 1839.5 | 1839.5 | 1829.9 | 1829.9 | 1829.9 |
| gdb 4148 | 1844.5 <sup>a</sup> | 1844.3 | 1818.2 | 1831.1 | 1846.4 | 1838.0 | 1827.5 | 1829.3 | 1829.3 | 1829.3 | 1824.0 | 1824.0 | 1824.0 |
| gdb 4149 | 1854.4 <sup>a</sup> | 1860.1 | 1839.5 | 1847.1 | 1859.0 | 1851.3 | 1845.6 | 1846.6 | 1846.6 | 1846.6 | 1842.5 | 1842.5 | 1842.5 |
| gdb 4150 | 1853.7 <sup>a</sup> | 1858.7 | 1832.1 | 1842.6 | 1855.7 | 1849.6 | 1846.8 | 1847.7 | 1847.7 | 1847.7 | 1843.1 | 1843.1 | 1843.1 |
| gdb 4151 | 1884.0 <sup>a</sup> | 1883.1 | 1866.9 | 1878.6 | 1884.2 | 1877.4 | 1872.5 | 1872.7 | 1872.7 | 1872.7 | 1871.9 | 1871.9 | 1871.9 |
| gdb 4152 | 1871.3 <sup>a</sup> | 1870.9 | 1854.5 | 1867.6 | 1870.6 | 1868.6 | 1865.2 | 1868.3 | 1868.3 | 1868.2 | 1865.4 | 1865.4 | 1865.4 |
| gdb 4153 | 1866.3 <sup>a</sup> | 1869.3 | 1851.8 | 1865.0 | 1871.5 | 1864.9 | 1856.6 | 1857.7 | 1857.7 | 1857.7 | 1859.3 | 1859.3 | 1859.3 |
| gdb 4154 | 1875.3 <sup>a</sup> | 1886.0 | 1873.2 | 1881.6 | 1884.1 | 1878.1 | 1874.5 | 1874.6 | 1874.6 | 1874.6 | 1877.3 | 1877.3 | 1877.3 |
| gdb 4155 | 1911.5 <sup>a</sup> | 1904.9 | 1905.0 | 1909.3 | 1916.5 | 1913.1 | 1906.8 | 1919.6 | 1919.6 | 1919.6 | 1916.6 | 1916.6 | 1916.6 |
| gdb 4156 | 1928.1 <sup>a</sup> | 1909.4 | 1912.3 | 1917.6 | 1922.2 | 1917.8 | 1913.9 | 1924.4 | 1924.4 | 1924.4 | 1921.2 | 1921.2 | 1921.2 |
| gdb 4157 | 1912.8 <sup>a</sup> | 1901.8 | 1904.4 | 1908.5 | 1916.8 | 1913.2 | 1905.8 | 1918.6 | 1918.6 | 1918.6 | 1916.3 | 1916.3 | 1916.3 |
| gdb 4158 | 1918.1 <sup>a</sup> | 1915.8 | 1918.4 | 1919.5 | 1920.3 | 1918.4 | 1917.4 | 1923.5 | 1923.5 | 1923.5 | 1924.2 | 1924.2 | 1924.2 |
| gdb 4159 | 1894.0 <sup>a</sup> | 1891.8 | 1888.9 | 1892.1 | 1902.0 | 1897.6 | 1886.5 | 1900.4 | 1900.4 | 1900.4 | 1895.8 | 1895.8 | 1895.8 |
| gdb 4160 | 1891.1 <sup>a</sup> | 1885.7 | 1881.9 | 1886.3 | 1898.4 | 1891.8 | 1881.2 | 1900.7 | 1900.7 | 1900.7 | 1890.5 | 1890.5 | 1890.5 |
| gdb 4161 | 1883.3 <sup>a</sup> | 1866.8 | 1862.1 | 1866.8 | 1876.0 | 1873.4 | 1867.3 | 1879.3 | 1879.3 | 1879.3 | 1870.1 | 1870.1 | 1870.1 |
| gdb 4162 | 1875.9 <sup>a</sup> | 1859.4 | 1856.9 | 1859.9 | 1872.3 | 1869.4 | 1863.6 | 1875.5 | 1875.5 | 1875.5 | 1866.9 | 1866.9 | 1866.9 |
| gdb 4163 | 1888.7 <sup>a</sup> | 1874.0 | 1873.0 | 1874.6 | 1891.6 | 1882.5 | 1875.8 | 1891.6 | 1891.6 | 1891.6 | 1881.9 | 1881.9 | 1881.9 |
| gdb 4164 | 1886.8 <sup>a</sup> | 1874.2 | 1876.6 | 1875.9 | 1884.6 | 1882.0 | 1878.6 | 1886.1 | 1886.1 | 1886.1 | 1880.5 | 1880.5 | 1880.5 |
| gdb 4165 | 1891.9 <sup>a</sup> | 1881.2 | 1881.3 | 1881.2 | 1895.8 | 1888.8 | 1882.4 | 1892.0 | 1892.0 | 1892.0 | 1888.7 | 1888.7 | 1888.7 |
| gdb 4166 | 1861.5 <sup>a</sup> | 1852.1 | 1827.2 | 1842.2 | 1854.3 | 1846.7 | 1842.6 | 1852.6 | 1852.6 | 1852.6 | 1843.6 | 1843.6 | 1843.6 |
| gdb 4167 | 1860.4 <sup>a</sup> | 1849.2 | 1825.7 | 1840.9 | 1854.0 | 1846.4 | 1840.5 | 1850.8 | 1850.8 | 1850.8 | 1843.5 | 1843.5 | 1843.5 |
| gdb 4168 | 1871.3 <sup>a</sup> | 1865.0 | 1845.9 | 1856.6 | 1865.2 | 1858.8 | 1855.0 | 1861.2 | 1861.2 | 1861.2 | 1856.6 | 1856.6 | 1856.6 |
| gdb 4169 | 1862.4 <sup>a</sup> | 1862.9 | 1842.3 | 1854.4 | 1870.3 | 1858.8 | 1852.1 | 1860.3 | 1860.3 | 1860.3 | 1856.9 | 1856.8 | 1856.8 |
| gdb 4170 | 1883.9 <sup>a</sup> | 1875.5 | 1865.2 | 1875.6 | 1880.1 | 1875.1 | 1874.4 | 1881.8 | 1881.8 | 1881.8 | 1879.2 | 1879.1 | 1879.1 |
| gdb 4171 | 1881.0 <sup>a</sup> | 1870.2 | 1862.3 | 1871.6 | 1879.9 | 1873.9 | 1870.9 | 1879.4 | 1879.4 | 1879.4 | 1878.1 | 1878.1 | 1878.1 |
| gdb 4172 | 1889.2 <sup>a</sup> | 1885.3 | 1880.2 | 1887.5 | 1886.3 | 1882.0 | 1882.2 | 1886.7 | 1886.7 | 1886.7 | 1888.2 | 1888.2 | 1888.2 |
| gdb 4173 | 1893.5 <sup>a</sup> | 1892.6 | 1886.0 | 1889.0 | 1898.1 | 1894.4 | 1887.5 | 1899.0 | 1899.0 | 1899.0 | 1894.6 | 1894.5 | 1894.5 |
| gdb 4174 | 1891.3 <sup>a</sup> | 1886.0 | 1882.0 | 1886.4 | 1898.2 | 1891.8 | 1881.6 | 1900.9 | 1900.9 | 1900.9 | 1890.6 | 1890.6 | 1890.6 |
| gdb 4175 | 1901.8 <sup>a</sup> | 1903.8 | 1907.5 | 1902.5 | 1913.7 | 1908.1 | 1897.0 | 1908.5 | 1908.5 | 1908.5 | 1899.3 | 1899.3 | 1899.3 |
| gdb 4176 | 1903.8 <sup>a</sup> | 1908.6 | 1914.0 | 1907.7 | 1916.4 | 1912.5 | 1902.0 | 1907.8 | 1907.8 | 1907.8 | 1904.9 | 1904.9 | 1904.9 |
| gdb 4177 | 1928.2 <sup>a</sup> | 1909.8 | 1911.9 | 1916.8 | 1921.7 | 1917.7 | 1914.4 | 1924.5 | 1924.5 | 1924.5 | 1921.2 | 1921.2 | 1921.2 |
| gdb 4178 | 1912.0 <sup>a</sup> | 1905.7 | 1905.7 | 1910.3 | 1916.1 | 1913.1 | 1907.3 | 1919.8 | 1919.8 | 1919.8 | 1917.0 | 1917.0 | 1917.0 |
| gdb 4179 | 1909.7 <sup>a</sup> | 1900.3 | 1902.1 | 1907.5 | 1912.0 | 1909.3 | 1902.7 | 1914.6 | 1914.6 | 1914.6 | 1912.3 | 1912.3 | 1912.3 |
| gdb 4180 | 1917.7 <sup>a</sup> | 1914.8 | 1918.4 | 1918.7 | 1919.6 | 1917.8 | 1916.7 | 1923.4 | 1923.4 | 1923.4 | 1923.9 | 1923.9 | 1923.9 |
| gdb 4181 | 1900.5 <sup>a</sup> | 1903.1 | 1906.5 | 1901.9 | 1912.4 | 1906.7 | 1896.0 | 1907.7 | 1907.7 | 1907.7 | 1898.1 | 1898.1 | 1898.1 |
| gdb 4182 | 1901.5 <sup>a</sup> | 1908.4 | 1913.9 | 1907.6 | 1912.2 | 1912.3 | 1901.6 | 1907.7 | 1907.7 | 1907.7 | 1904.7 | 1904.7 | 1904.7 |
| gdb 4183 | 1902.1 <sup>a</sup> | 1908.9 | 1900.4 | 1904.7 | 1906.9 | 1903.5 | 1903.7 | 1907.9 | 1907.9 | 1907.9 | 1909.3 | 1909.3 | 1909.3 |
| gdb 4184 | 1903.7 <sup>a</sup> | 1907.8 | 1897.5 | 1904.0 | 1903.4 | 1900.8 | 1901.6 | 1904.7 | 1904.7 | 1904.7 | 1907.9 | 1907.9 | 1907.9 |

. . . continued on next page . . .



Table S26: ... continued from previous page. ...

| Molecule | Ref.                | MNDO   | AMI    | PM3    | PM6    | PM7    | OM1    | OM2    |        | OM3    |        | D3T    |
|----------|---------------------|--------|--------|--------|--------|--------|--------|--------|--------|--------|--------|--------|
|          |                     |        |        |        |        |        |        | D2     | D3     | D2     | D3     |        |
| gdb 4185 | 1902.1 <sup>a</sup> | 1895.0 | 1884.2 | 1893.8 | 1895.5 | 1896.3 | 1893.7 | 1902.1 | 1902.1 | 1898.2 | 1898.2 | 1898.2 |
| gdb 4186 | 1895.4 <sup>a</sup> | 1896.3 | 1885.4 | 1894.1 | 1900.3 | 1896.6 | 1890.7 | 1899.7 | 1899.7 | 1898.9 | 1898.9 | 1898.9 |
| gdb 4187 | 1891.8 <sup>a</sup> | 1889.6 | 1884.2 | 1883.9 | 1893.9 | 1892.1 | 1881.7 | 1887.3 | 1887.3 | 1882.3 | 1882.3 | 1882.3 |
| gdb 4188 | 1878.2 <sup>a</sup> | 1888.3 | 1877.8 | 1883.0 | 1891.9 | 1884.2 | 1875.0 | 1877.7 | 1877.7 | 1876.8 | 1876.8 | 1876.8 |
| gdb 4189 | 1886.6 <sup>a</sup> | 1899.6 | 1893.3 | 1891.2 | 1899.7 | 1894.3 | 1884.8 | 1885.7 | 1885.7 | 1887.5 | 1887.5 | 1887.5 |
| gdb 4190 | 1891.5 <sup>a</sup> | 1893.3 | 1887.0 | 1892.1 | 1895.0 | 1891.1 | 1889.9 | 1894.2 | 1894.2 | 1893.6 | 1893.6 | 1893.6 |
| gdb 4191 | 1891.6 <sup>a</sup> | 1893.4 | 1884.9 | 1891.3 | 1893.8 | 1891.0 | 1891.5 | 1895.9 | 1895.9 | 1895.3 | 1895.3 | 1895.3 |
| gdb 4192 | 1896.1 <sup>a</sup> | 1892.3 | 1884.6 | 1891.0 | 1887.0 | 1888.6 | 1891.5 | 1894.3 | 1894.3 | 1890.7 | 1890.7 | 1890.7 |
| gdb 4193 | 1898.9 <sup>a</sup> | 1904.6 | 1901.0 | 1901.5 | 1904.0 | 1897.8 | 1901.9 | 1901.7 | 1901.7 | 1903.8 | 1903.8 | 1903.9 |
| gdb 4194 | 1895.3 <sup>a</sup> | 1896.8 | 1891.8 | 1894.3 | 1905.8 | 1900.9 | 1895.6 | 1900.7 | 1900.7 | 1899.7 | 1899.7 | 1899.7 |
| gdb 4195 | 1909.5 <sup>a</sup> | 1906.4 | 1901.9 | 1905.6 | 1914.7 | 1907.8 | 1905.2 | 1908.4 | 1908.3 | 1905.9 | 1905.9 | 1905.9 |
| gdb 4196 | 1899.0 <sup>a</sup> | 1895.2 | 1891.8 | 1894.1 | 1897.8 | 1897.3 | 1895.3 | 1900.1 | 1900.1 | 1896.3 | 1896.2 | 1896.2 |
| gdb 4197 | 1902.8 <sup>a</sup> | 1907.6 | 1907.5 | 1905.9 | 1914.9 | 1909.4 | 1904.2 | 1907.6 | 1907.6 | 1909.6 | 1909.6 | 1909.5 |
| gdb 4198 | 1885.0 <sup>a</sup> | 1891.5 | 1886.6 | 1885.0 | 1893.5 | 1890.9 | 1880.6 | 1884.8 | 1884.8 | 1880.5 | 1880.5 | 1880.5 |
| gdb 4199 | 1870.9 <sup>a</sup> | 1864.4 | 1849.4 | 1856.7 | 1862.4 | 1862.1 | 1860.8 | 1864.7 | 1864.6 | 1855.1 | 1855.1 | 1855.1 |
| gdb 4200 | 1866.4 <sup>a</sup> | 1866.6 | 1850.6 | 1857.9 | 1870.7 | 1865.8 | 1860.0 | 1865.4 | 1865.3 | 1858.6 | 1858.6 | 1858.6 |
| gdb 4201 | 1872.1 <sup>a</sup> | 1878.2 | 1862.5 | 1866.0 | 1879.0 | 1868.5 | 1869.7 | 1869.9 | 1869.9 | 1865.5 | 1865.5 | 1865.5 |
| gdb 4202 | 1875.5 <sup>a</sup> | 1876.6 | 1866.2 | 1869.9 | 1880.7 | 1875.8 | 1873.0 | 1875.4 | 1875.4 | 1871.2 | 1871.2 | 1871.2 |
| gdb 4203 | 1891.6 <sup>a</sup> | 1887.8 | 1885.6 | 1889.2 | 1887.1 | 1887.8 | 1891.1 | 1892.5 | 1892.5 | 1889.7 | 1889.4 | 1889.4 |
| gdb 4204 | 1885.5 <sup>a</sup> | 1888.9 | 1885.9 | 1889.4 | 1893.6 | 1890.0 | 1889.5 | 1892.3 | 1892.3 | 1891.7 | 1891.7 | 1891.7 |
| gdb 4205 | 1895.0 <sup>a</sup> | 1900.5 | 1900.6 | 1900.0 | 1901.6 | 1898.9 | 1901.9 | 1900.4 | 1900.4 | 1901.6 | 1901.6 | 1901.6 |
| gdb 4206 | 1875.8 <sup>a</sup> | 1869.9 | 1856.7 | 1859.9 | 1868.5 | 1867.4 | 1866.2 | 1867.6 | 1867.6 | 1858.3 | 1858.3 | 1858.3 |
| gdb 4207 | 1867.9 <sup>a</sup> | 1869.1 | 1855.4 | 1859.4 | 1872.4 | 1867.6 | 1859.9 | 1862.1 | 1862.1 | 1855.5 | 1855.5 | 1855.5 |
| gdb 4208 | 1879.1 <sup>a</sup> | 1882.1 | 1872.2 | 1871.1 | 1883.0 | 1877.5 | 1874.6 | 1874.2 | 1874.2 | 1870.5 | 1870.4 | 1870.4 |
| gdb 4209 | 1875.4 <sup>a</sup> | 1880.4 | 1870.9 | 1869.5 | 1882.3 | 1876.6 | 1875.2 | 1873.8 | 1873.8 | 1870.1 | 1870.1 | 1870.1 |
| gdb 4210 | 1884.2 <sup>a</sup> | 1888.5 | 1883.9 | 1881.7 | 1889.7 | 1888.1 | 1881.1 | 1884.1 | 1884.1 | 1879.1 | 1879.1 | 1879.1 |
| gdb 4211 | 1905.2 <sup>a</sup> | 1903.7 | 1900.4 | 1905.7 | 1910.8 | 1904.9 | 1899.2 | 1902.5 | 1902.5 | 1900.3 | 1900.2 | 1900.2 |
| gdb 4212 | 1898.2 <sup>a</sup> | 1895.9 | 1891.7 | 1894.1 | 1900.4 | 1899.8 | 1896.4 | 1900.5 | 1900.5 | 1897.2 | 1897.2 | 1897.2 |
| gdb 4213 | 1892.8 <sup>a</sup> | 1895.5 | 1889.6 | 1891.7 | 1900.7 | 1898.3 | 1894.9 | 1898.6 | 1898.6 | 1897.9 | 1897.9 | 1897.9 |
| gdb 4214 | 1902.2 <sup>a</sup> | 1908.3 | 1906.9 | 1904.7 | 1911.3 | 1907.6 | 1905.7 | 1906.2 | 1906.2 | 1907.9 | 1907.9 | 1907.9 |
| gdb 4215 | 1880.8 <sup>a</sup> | 1886.1 | 1881.8 | 1875.5 | 1886.1 | 1883.4 | 1878.3 | 1876.2 | 1876.2 | 1872.8 | 1872.8 | 1872.8 |
| gdb 4216 | 1876.0 <sup>a</sup> | 1877.1 | 1858.0 | 1869.2 | 1883.2 | 1872.6 | 1858.7 | 1864.9 | 1864.9 | 1865.0 | 1864.9 | 1864.9 |
| gdb 4217 | 1873.3 <sup>a</sup> | 1878.3 | 1858.0 | 1870.2 | 1880.2 | 1869.1 | 1861.8 | 1869.2 | 1869.2 | 1868.5 | 1868.5 | 1868.5 |
| gdb 4218 | 1878.5 <sup>a</sup> | 1889.9 | 1872.9 | 1881.2 | 1887.1 | 1876.0 | 1870.5 | 1873.5 | 1873.5 | 1876.2 | 1876.2 | 1876.2 |
| gdb 4219 | 1853.3 <sup>a</sup> | 1868.1 | 1836.9 | 1853.4 | 1864.9 | 1855.8 | 1843.8 | 1847.4 | 1847.4 | 1840.1 | 1840.1 | 1840.1 |
| gdb 4220 | 1854.1 <sup>a</sup> | 1882.3 | 1853.3 | 1865.7 | 1872.3 | 1864.4 | 1857.1 | 1857.1 | 1857.1 | 1852.1 | 1852.0 | 1852.0 |
| gdb 4221 | 1852.5 <sup>a</sup> | 1877.8 | 1848.6 | 1864.1 | 1876.3 | 1864.3 | 1849.1 | 1849.8 | 1849.8 | 1849.3 | 1849.3 | 1849.3 |
| gdb 4222 | 1887.1 <sup>a</sup> | 1891.4 | 1888.4 | 1888.5 | 1899.6 | 1890.4 | 1876.6 | 1885.9 | 1885.9 | 1879.9 | 1879.8 | 1879.8 |
| gdb 4223 | 1892.5 <sup>a</sup> | 1892.1 | 1891.1 | 1890.7 | 1905.0 | 1895.9 | 1883.4 | 1893.5 | 1893.5 | 1886.4 | 1886.4 | 1886.4 |
| gdb 4224 | 1894.2 <sup>a</sup> | 1898.0 | 1897.5 | 1895.4 | 1907.5 | 1899.0 | 1888.7 | 1893.8 | 1893.8 | 1892.5 | 1892.4 | 1892.4 |
| gdb 4225 | 1873.1 <sup>a</sup> | 1878.7 | 1859.3 | 1869.4 | 1882.0 | 1871.1 | 1857.8 | 1863.3 | 1863.3 | 1863.1 | 1863.1 | 1863.1 |
| gdb 4226 | 1868.2 <sup>a</sup> | 1876.1 | 1853.2 | 1865.6 | 1871.5 | 1860.9 | 1852.7 | 1856.8 | 1856.8 | 1857.4 | 1857.4 | 1857.4 |
| gdb 4227 | 1870.8 <sup>a</sup> | 1878.5 | 1867.2 | 1869.4 | 1877.6 | 1866.8 | 1860.0 | 1867.1 | 1867.0 | 1866.2 | 1866.2 | 1866.2 |
| gdb 4228 | 1876.9 <sup>a</sup> | 1890.7 | 1873.3 | 1881.1 | 1885.8 | 1875.6 | 1870.3 | 1872.5 | 1872.5 | 1875.3 | 1875.3 | 1875.3 |
| gdb 4229 | 1873.1 <sup>a</sup> | 1874.0 | 1858.0 | 1868.3 | 1880.9 | 1870.4 | 1857.5 | 1863.6 | 1863.6 | 1863.0 | 1863.0 | 1862.9 |

... continued on next page ...

Table S26: ... continued from previous page ...

| Molecule | Ref.                | MNDO   | AMI    | PM3    | PM6    | PM7    | OM1    | OM2    |        | OM3    |        | D3T    |
|----------|---------------------|--------|--------|--------|--------|--------|--------|--------|--------|--------|--------|--------|
|          |                     |        |        |        |        |        |        | D2     | D3     | D2     | D3     |        |
| gdb 4230 | 1868.2 <sup>a</sup> | 1872.7 | 1851.7 | 1864.4 | 1873.0 | 1863.2 | 1853.3 | 1857.6 | 1857.6 | 1857.7 | 1857.7 | 1857.7 |
| gdb 4231 | 1871.1 <sup>a</sup> | 1875.9 | 1856.9 | 1869.2 | 1878.7 | 1868.4 | 1860.3 | 1868.3 | 1868.3 | 1866.9 | 1866.9 | 1866.9 |
| gdb 4232 | 1877.5 <sup>a</sup> | 1888.6 | 1871.1 | 1878.3 | 1883.6 | 1874.8 | 1872.2 | 1873.6 | 1873.6 | 1875.7 | 1875.7 | 1875.7 |
| gdb 4233 | 1870.1 <sup>a</sup> | 1872.1 | 1854.0 | 1863.5 | 1877.3 | 1867.6 | 1854.7 | 1862.3 | 1862.3 | 1856.0 | 1856.0 | 1856.0 |
| gdb 4234 | 1867.0 <sup>a</sup> | 1870.8 | 1855.0 | 1863.8 | 1877.8 | 1868.2 | 1854.7 | 1864.1 | 1864.1 | 1857.7 | 1857.6 | 1857.6 |
| gdb 4235 | 1874.4 <sup>a</sup> | 1882.9 | 1868.1 | 1873.4 | 1885.1 | 1875.3 | 1866.5 | 1870.4 | 1870.4 | 1867.0 | 1867.0 | 1867.0 |
| gdb 4236 | 1877.7 <sup>a</sup> | 1883.6 | 1872.2 | 1877.4 | 1890.7 | 1880.8 | 1868.3 | 1873.7 | 1873.7 | 1870.5 | 1870.4 | 1870.4 |
| gdb 4237 | 1848.9 <sup>a</sup> | 1836.7 | 1810.3 | 1826.5 | 1846.0 | 1833.9 | 1823.9 | 1837.7 | 1837.7 | 1831.2 | 1831.2 | 1831.2 |
| gdb 4238 | 1860.8 <sup>a</sup> | 1857.8 | 1835.0 | 1846.5 | 1862.4 | 1850.6 | 1843.7 | 1854.4 | 1854.4 | 1850.2 | 1850.2 | 1850.2 |
| gdb 4239 | 1848.1 <sup>a</sup> | 1846.7 | 1826.4 | 1839.4 | 1854.4 | 1840.8 | 1831.1 | 1840.9 | 1840.9 | 1839.8 | 1839.8 | 1839.8 |
| gdb 4240 | 1873.8 <sup>a</sup> | 1888.6 | 1869.3 | 1880.0 | 1892.3 | 1881.6 | 1867.6 | 1874.3 | 1874.3 | 1868.5 | 1868.5 | 1868.5 |
| gdb 4241 | 1877.6 <sup>a</sup> | 1900.3 | 1884.7 | 1891.0 | 1899.5 | 1888.7 | 1877.0 | 1879.5 | 1879.5 | 1876.7 | 1876.7 | 1876.7 |
| gdb 4242 | 1877.7 <sup>a</sup> | 1899.4 | 1882.5 | 1889.4 | 1898.3 | 1887.7 | 1877.1 | 1879.1 | 1879.1 | 1876.7 | 1876.7 | 1876.7 |
| gdb 4243 | 1881.3 <sup>a</sup> | 1870.6 | 1858.3 | 1867.4 | 1883.6 | 1873.6 | 1864.0 | 1877.2 | 1877.2 | 1871.1 | 1871.0 | 1871.0 |
| gdb 4244 | 1887.5 <sup>a</sup> | 1875.4 | 1865.7 | 1873.2 | 1888.8 | 1877.7 | 1868.9 | 1884.4 | 1884.4 | 1875.7 | 1875.7 | 1875.7 |
| gdb 4245 | 1885.4 <sup>a</sup> | 1881.3 | 1869.4 | 1875.2 | 1885.8 | 1876.7 | 1873.5 | 1880.8 | 1880.8 | 1877.5 | 1877.5 | 1877.5 |
| gdb 4246 | 1887.9 <sup>a</sup> | 1881.1 | 1872.7 | 1878.2 | 1891.6 | 1882.2 | 1874.2 | 1884.1 | 1884.1 | 1881.4 | 1881.4 | 1881.4 |
| gdb 4247 | 1876.9 <sup>a</sup> | 1881.3 | 1863.2 | 1871.9 | 1882.3 | 1875.8 | 1868.1 | 1871.0 | 1871.0 | 1864.2 | 1864.2 | 1864.2 |
| gdb 4248 | 1877.7 <sup>a</sup> | 1893.6 | 1878.2 | 1882.8 | 1888.0 | 1882.5 | 1879.9 | 1879.5 | 1879.5 | 1874.9 | 1874.9 | 1874.9 |
| gdb 4249 | 1871.6 <sup>a</sup> | 1893.7 | 1878.1 | 1882.9 | 1893.2 | 1883.6 | 1876.8 | 1878.0 | 1878.0 | 1876.2 | 1876.2 | 1876.2 |
| gdb 4250 | 1849.5 <sup>a</sup> | 1870.8 | 1833.8 | 1853.3 | 1863.9 | 1850.5 | 1833.8 | 1838.9 | 1838.9 | 1834.4 | 1834.4 | 1834.4 |
| gdb 4251 | 1850.2 <sup>a</sup> | 1871.9 | 1834.6 | 1854.2 | 1866.1 | 1852.1 | 1835.8 | 1840.9 | 1840.9 | 1835.8 | 1835.7 | 1835.7 |
| gdb 4252 | 1849.0 <sup>a</sup> | 1871.9 | 1836.7 | 1855.3 | 1868.9 | 1854.0 | 1835.7 | 1839.8 | 1839.8 | 1835.2 | 1835.2 | 1835.2 |
| gdb 4253 | 1854.7 <sup>a</sup> | 1887.6 | 1853.8 | 1869.5 | 1876.6 | 1863.6 | 1850.8 | 1851.4 | 1851.4 | 1848.8 | 1848.8 | 1848.8 |
| gdb 4254 | 1851.1 <sup>a</sup> | 1887.3 | 1855.8 | 1870.4 | 1879.4 | 1865.3 | 1849.2 | 1850.7 | 1850.7 | 1848.6 | 1848.6 | 1848.6 |
| gdb 4255 | 1853.6 <sup>a</sup> | 1886.5 | 1854.5 | 1870.3 | 1880.1 | 1866.7 | 1850.3 | 1852.0 | 1852.0 | 1850.2 | 1850.2 | 1850.2 |
| gdb 4256 | 1890.0 <sup>a</sup> | 1900.2 | 1885.0 | 1892.0 | 1898.1 | 1892.3 | 1883.1 | 1889.0 | 1889.0 | 1885.7 | 1885.7 | 1885.7 |
| gdb 4257 | 1893.6 <sup>a</sup> | 1913.1 | 1903.5 | 1905.9 | 1908.2 | 1902.4 | 1896.5 | 1899.1 | 1899.1 | 1898.3 | 1898.3 | 1898.3 |
| gdb 4258 | 1902.4 <sup>a</sup> | 1912.2 | 1908.9 | 1906.6 | 1915.4 | 1909.4 | 1903.0 | 1910.8 | 1910.8 | 1902.5 | 1902.4 | 1902.4 |
| gdb 4259 | 1911.7 <sup>a</sup> | 1924.0 | 1913.7 | 1921.0 | 1923.3 | 1915.8 | 1911.1 | 1914.6 | 1914.6 | 1912.0 | 1912.0 | 1912.0 |
| gdb 4260 | 1893.2 <sup>a</sup> | 1915.2 | 1904.0 | 1910.7 | 1913.4 | 1908.1 | 1901.1 | 1906.9 | 1906.9 | 1905.4 | 1905.4 | 1905.4 |
| gdb 4261 | 1901.2 <sup>a</sup> | 1913.6 | 1901.0 | 1908.8 | 1914.7 | 1908.8 | 1900.9 | 1904.6 | 1904.6 | 1904.0 | 1904.0 | 1904.0 |
| gdb 4262 | 1900.0 <sup>a</sup> | 1926.2 | 1918.0 | 1921.9 | 1922.9 | 1917.4 | 1911.3 | 1913.3 | 1913.3 | 1915.0 | 1914.9 | 1914.9 |
| gdb 4263 | 1870.9 <sup>a</sup> | 1890.1 | 1872.6 | 1878.9 | 1886.9 | 1878.3 | 1867.8 | 1874.8 | 1874.8 | 1872.6 | 1872.6 | 1872.6 |
| gdb 4264 | 1872.6 <sup>a</sup> | 1891.6 | 1869.8 | 1883.9 | 1883.4 | 1878.4 | 1871.5 | 1874.1 | 1874.1 | 1871.6 | 1871.6 | 1871.6 |
| gdb 4265 | 1871.3 <sup>a</sup> | 1890.9 | 1870.9 | 1884.9 | 1884.4 | 1878.0 | 1869.6 | 1872.5 | 1872.5 | 1870.1 | 1870.1 | 1870.1 |
| gdb 4266 | 1874.5 <sup>a</sup> | 1891.3 | 1870.5 | 1885.4 | 1886.0 | 1880.2 | 1872.1 | 1875.0 | 1875.0 | 1872.7 | 1872.7 | 1872.7 |
| gdb 4267 | 1877.5 <sup>a</sup> | 1906.0 | 1886.9 | 1900.2 | 1894.9 | 1889.2 | 1866.3 | 1885.9 | 1885.8 | 1885.6 | 1885.6 | 1885.6 |
| gdb 4268 | 1902.2 <sup>a</sup> | 1901.0 | 1900.8 | 1904.6 | 1907.3 | 1904.4 | 1899.2 | 1908.5 | 1908.5 | 1906.3 | 1906.3 | 1906.3 |
| gdb 4269 | 1902.4 <sup>a</sup> | 1900.8 | 1901.3 | 1905.2 | 1908.8 | 1905.4 | 1899.2 | 1909.1 | 1909.1 | 1907.0 | 1907.0 | 1907.0 |
| gdb 4270 | 1905.2 <sup>a</sup> | 1901.6 | 1900.8 | 1905.6 | 1910.9 | 1908.0 | 1902.0 | 1911.9 | 1911.9 | 1909.8 | 1909.8 | 1909.8 |
| gdb 4271 | 1911.0 <sup>a</sup> | 1914.2 | 1917.1 | 1919.3 | 1918.8 | 1916.0 | 1912.1 | 1918.1 | 1918.1 | 1919.1 | 1919.1 | 1919.1 |
| gdb 4272 | 1889.8 <sup>a</sup> | 1888.4 | 1895.8 | 1890.4 | 1901.7 | 1898.6 | 1886.6 | 1898.2 | 1898.2 | 1891.0 | 1891.0 | 1891.0 |
| gdb 4273 | 1895.4 <sup>a</sup> | 1893.9 | 1903.7 | 1896.6 | 1908.3 | 1903.5 | 1892.0 | 1904.7 | 1904.7 | 1895.1 | 1895.1 | 1895.1 |
| gdb 4274 | 1898.6 <sup>a</sup> | 1901.3 | 1912.4 | 1903.0 | 1910.9 | 1907.5 | 1898.4 | 1904.8 | 1904.8 | 1901.5 | 1901.5 | 1901.5 |

... continued on next page ...



Table S26: . . . continued from previous page. . . .

| Molecule | Ref.                | MNDO   | AMI    | PM3    | PM6    | PM7    | OM1    |        | OM2    |        | OM3    |        | D3T    |
|----------|---------------------|--------|--------|--------|--------|--------|--------|--------|--------|--------|--------|--------|--------|
|          |                     |        |        |        |        |        | D2     | D3     | D2     | D3     | D2     | D3     |        |
| gdb 4320 | 1906.4 <sup>a</sup> | 1911.6 | 1918.0 | 1911.9 | 1911.2 | 1912.6 | 1910.7 | 1908.6 | 1908.6 | 1910.0 | 1910.0 | 1910.0 | 1910.0 |
| gdb 4321 | 1903.9 <sup>a</sup> | 1902.9 | 1908.1 | 1908.5 | 1905.3 | 1906.6 | 1906.6 | 1910.9 | 1910.9 | 1910.4 | 1910.4 | 1910.4 | 1910.4 |
| gdb 4322 | 1906.2 <sup>a</sup> | 1902.9 | 1905.9 | 1908.2 | 1902.1 | 1904.4 | 1905.4 | 1910.1 | 1910.1 | 1909.7 | 1909.6 | 1909.7 | 1909.7 |
| gdb 4323 | 1886.1 <sup>a</sup> | 1899.9 | 1888.2 | 1891.8 | 1898.9 | 1892.1 | 1881.9 | 1885.3 | 1885.4 | 1882.3 | 1882.3 | 1882.3 | 1882.3 |
| gdb 4324 | 1879.8 <sup>a</sup> | 1898.2 | 1887.8 | 1890.1 | 1894.4 | 1887.4 | 1878.7 | 1880.5 | 1880.4 | 1877.4 | 1877.4 | 1877.4 | 1877.4 |
| gdb 4325 | 1907.5 <sup>a</sup> | 1910.9 | 1912.8 | 1912.9 | 1916.0 | 1915.2 | 1911.3 | 1915.7 | 1915.7 | 1916.8 | 1916.8 | 1916.8 | 1916.8 |
| gdb 4326 | 1878.9 <sup>a</sup> | 1883.6 | 1880.7 | 1878.6 | 1884.2 | 1882.2 | 1878.6 | 1879.7 | 1879.7 | 1875.1 | 1875.1 | 1875.1 | 1875.1 |
| gdb 4327 | 1913.2 <sup>a</sup> | 1907.7 | 1913.9 | 1912.3 | 1914.9 | 1912.8 | 1910.4 | 1910.9 | 1910.9 | 1908.2 | 1908.1 | 1908.1 | 1908.1 |
| gdb 4328 | 1900.4 <sup>a</sup> | 1908.4 | 1914.3 | 1912.2 | 1908.6 | 1908.6 | 1907.3 | 1907.1 | 1907.1 | 1909.8 | 1909.8 | 1909.7 | 1909.7 |
| gdb 4329 | 1890.4 <sup>a</sup> | 1890.3 | 1884.4 | 1884.2 | 1892.7 | 1890.6 | 1881.5 | 1886.5 | 1886.5 | 1882.0 | 1882.0 | 1882.0 | 1882.0 |
| gdb 4330 | 1887.3 <sup>a</sup> | 1899.5 | 1893.7 | 1890.5 | 1899.4 | 1893.6 | 1886.6 | 1886.5 | 1886.5 | 1888.2 | 1888.2 | 1888.2 | 1888.2 |
| gdb 4331 | 1887.8 <sup>a</sup> | 1888.4 | 1886.1 | 1882.7 | 1891.8 | 1889.1 | 1880.2 | 1882.7 | 1882.7 | 1878.6 | 1878.6 | 1878.6 | 1878.6 |
| gdb 4332 | 1890.5 <sup>a</sup> | 1889.1 | 1883.9 | 1883.5 | 1892.1 | 1890.5 | 1882.2 | 1886.6 | 1886.6 | 1881.9 | 1881.9 | 1881.9 | 1881.9 |
| gdb 4333 | 1886.9 <sup>a</sup> | 1897.8 | 1894.4 | 1891.9 | 1899.4 | 1894.5 | 1885.3 | 1887.2 | 1887.2 | 1888.5 | 1888.5 | 1888.4 | 1888.4 |
| gdb 4334 | 1881.7 <sup>a</sup> | 1893.3 | 1888.3 | 1885.7 | 1898.1 | 1891.6 | 1879.4 | 1881.2 | 1881.1 | 1878.5 | 1878.5 | 1878.5 | 1878.5 |
| gdb 4335 | 1879.5 <sup>a</sup> | 1884.7 | 1883.4 | 1877.5 | 1888.6 | 1885.7 | 1877.7 | 1877.4 | 1877.4 | 1873.7 | 1873.7 | 1873.7 | 1873.7 |
| gdb 4336 | 1885.5 <sup>a</sup> | 1904.6 | 1896.2 | 1892.6 | 1901.4 | 1894.5 | 1885.2 | 1883.4 | 1883.4 | 1881.2 | 1881.2 | 1881.2 | 1881.2 |
| gdb 4337 | 1884.0 <sup>a</sup> | 1903.1 | 1892.3 | 1890.0 | 1898.3 | 1891.3 | 1882.8 | 1880.7 | 1880.7 | 1878.4 | 1878.4 | 1878.4 | 1878.4 |
| gdb 4338 | 1895.8 <sup>a</sup> | 1904.8 | 1910.7 | 1896.2 | 1905.4 | 1902.6 | 1897.1 | 1894.4 | 1894.4 | 1894.7 | 1894.6 | 1894.6 | 1894.6 |
| gdb 4339 | 1909.0 <sup>a</sup> | 1909.8 | 1911.4 | 1911.0 | 1917.4 | 1914.0 | 1908.1 | 1910.6 | 1910.6 | 1907.5 | 1907.5 | 1907.5 | 1907.5 |
| gdb 4340 | 1905.8 <sup>a</sup> | 1912.2 | 1919.6 | 1913.6 | 1920.0 | 1918.0 | 1909.9 | 1912.7 | 1912.7 | 1914.1 | 1914.1 | 1914.1 | 1914.1 |
| gdb 4341 | 1886.7 <sup>a</sup> | 1888.6 | 1885.3 | 1882.6 | 1890.2 | 1888.0 | 1880.8 | 1883.6 | 1883.6 | 1878.4 | 1878.4 | 1878.4 | 1878.4 |
| gdb 4342 | 1904.8 <sup>a</sup> | 1909.3 | 1915.8 | 1909.9 | 1908.0 | 1908.4 | 1909.0 | 1906.5 | 1906.5 | 1908.3 | 1908.3 | 1908.3 | 1908.3 |
| gdb 4343 | 1881.1 <sup>a</sup> | 1887.4 | 1882.6 | 1874.9 | 1885.7 | 1882.7 | 1879.6 | 1876.3 | 1876.3 | 1872.5 | 1872.5 | 1872.5 | 1872.5 |
| gdb 4344 | 1911.5 <sup>a</sup> | 1909.2 | 1914.5 | 1913.0 | 1916.0 | 1912.7 | 1906.2 | 1909.1 | 1909.0 | 1906.2 | 1906.2 | 1906.2 | 1906.2 |
| gdb 4345 | 1908.3 <sup>a</sup> | 1913.8 | 1919.7 | 1913.2 | 1916.4 | 1916.4 | 1911.0 | 1912.9 | 1912.9 | 1913.8 | 1913.8 | 1913.8 | 1913.8 |
| gdb 4346 | 1916.6 <sup>a</sup> | 1920.8 | 1922.8 | 1926.2 | 1920.8 | 1922.8 | 1922.3 | 1927.7 | 1927.7 | 1929.8 | 1929.8 | 1929.8 | 1929.8 |
| gdb 4347 | 1914.4 <sup>a</sup> | 1917.7 | 1920.7 | 1918.4 | 1921.2 | 1920.1 | 1910.8 | 1918.4 | 1918.4 | 1918.9 | 1918.9 | 1918.9 | 1918.9 |
| gdb 4348 | 1920.4 <sup>a</sup> | 1917.0 | 1916.8 | 1919.5 | 1920.4 | 1917.9 | 1909.0 | 1917.0 | 1917.0 | 1913.1 | 1913.1 | 1913.1 | 1913.1 |
| gdb 4349 | 1906.6 <sup>a</sup> | 1907.9 | 1907.7 | 1908.1 | 1911.3 | 1911.2 | 1901.6 | 1911.6 | 1911.6 | 1908.8 | 1908.8 | 1908.8 | 1908.8 |
| gdb 4350 | 1894.9 <sup>a</sup> | 1897.3 | 1887.8 | 1893.8 | 1893.8 | 1894.8 | 1894.8 | 1899.8 | 1899.8 | 1896.1 | 1896.1 | 1896.1 | 1896.1 |
| gdb 4351 | 1912.0 <sup>a</sup> | 1907.9 | 1900.6 | 1907.1 | 1912.5 | 1906.3 | 1905.2 | 1910.5 | 1910.5 | 1907.8 | 1907.8 | 1907.8 | 1907.8 |
| gdb 4352 | 1894.5 <sup>a</sup> | 1899.0 | 1891.2 | 1896.6 | 1903.8 | 1899.6 | 1896.8 | 1904.2 | 1904.2 | 1902.6 | 1902.6 | 1902.6 | 1902.6 |
| gdb 4353 | 1903.3 <sup>a</sup> | 1909.6 | 1905.6 | 1907.5 | 1913.9 | 1909.9 | 1908.5 | 1912.4 | 1912.4 | 1914.1 | 1914.1 | 1914.1 | 1914.1 |
| gdb 4354 | 1917.8 <sup>a</sup> | 1921.1 | 1924.5 | 1927.0 | 1921.5 | 1922.9 | 1925.3 | 1928.2 | 1928.2 | 1930.9 | 1930.9 | 1930.9 | 1930.9 |
| gdb 4355 | 1898.4 <sup>a</sup> | 1895.2 | 1891.7 | 1894.0 | 1897.4 | 1897.2 | 1895.5 | 1900.6 | 1900.6 | 1896.5 | 1896.5 | 1896.5 | 1896.5 |
| gdb 4356 | 1909.2 <sup>a</sup> | 1904.8 | 1902.3 | 1905.6 | 1912.0 | 1905.1 | 1901.3 | 1905.7 | 1905.7 | 1902.7 | 1902.7 | 1902.7 | 1902.7 |
| gdb 4357 | 1896.9 <sup>a</sup> | 1907.6 | 1893.4 | 1894.5 | 1903.9 | 1900.0 | 1896.3 | 1902.2 | 1902.2 | 1900.3 | 1900.3 | 1900.3 | 1900.3 |
| gdb 4358 | 1903.5 <sup>a</sup> | 1907.7 | 1904.7 | 1903.5 | 1914.1 | 1906.7 | 1905.8 | 1907.5 | 1907.5 | 1909.2 | 1909.1 | 1909.2 | 1909.2 |
| gdb 4359 | 1915.1 <sup>a</sup> | 1917.7 | 1921.5 | 1919.5 | 1923.5 | 1921.6 | 1911.6 | 1919.8 | 1919.8 | 1920.4 | 1920.4 | 1920.4 | 1920.4 |
| gdb 4360 | 1921.3 <sup>a</sup> | 1916.0 | 1917.5 | 1920.5 | 1923.5 | 1919.6 | 1909.1 | 1917.9 | 1917.9 | 1914.4 | 1914.4 | 1914.4 | 1914.4 |
| gdb 4361 | 1906.5 <sup>a</sup> | 1906.1 | 1907.8 | 1908.2 | 1913.2 | 1912.2 | 1901.4 | 1912.2 | 1912.2 | 1909.2 | 1909.2 | 1909.2 | 1909.2 |
| gdb 4362 | 1899.9 <sup>a</sup> | 1900.9 | 1903.8 | 1900.1 | 1906.6 | 1905.1 | 1897.9 | 1902.9 | 1902.9 | 1901.1 | 1901.1 | 1901.1 | 1901.1 |
| gdb 4363 | 1911.8 <sup>a</sup> | 1908.8 | 1914.4 | 1912.7 | 1916.1 | 1911.7 | 1904.1 | 1907.9 | 1907.9 | 1905.2 | 1905.2 | 1905.1 | 1905.1 |
| gdb 4364 | 1906.4 <sup>a</sup> | 1912.6 | 1917.4 | 1911.2 | 1916.7 | 1915.2 | 1910.3 | 1911.5 | 1911.5 | 1913.0 | 1912.9 | 1912.9 | 1912.9 |

. . . continued on next page . . .

Table S26: . . . continued from previous page. . . .

| Molecule | Ref.                | MNDO   | AMI    | PM3    | PM6    | PM7    | OM1    |        | OM2    |        | OM3    |        | D3T    |
|----------|---------------------|--------|--------|--------|--------|--------|--------|--------|--------|--------|--------|--------|--------|
|          |                     |        |        |        |        |        | D2     | D3     | D2     | D3     | D2     | D3     |        |
| gdb 4365 | 1924.7 <sup>a</sup> | 1921.8 | 1927.3 | 1929.0 | 1931.3 | 1931.2 | 1926.7 | 1934.0 | 1934.0 | 1934.0 | 1936.5 | 1936.5 | 1936.5 |
| gdb 4366 | 1906.4 <sup>a</sup> | 1908.7 | 1912.6 | 1911.9 | 1915.1 | 1911.7 | 1904.3 | 1907.4 | 1907.4 | 1907.4 | 1904.2 | 1904.2 | 1904.2 |
| gdb 4367 | 1899.7 <sup>a</sup> | 1902.2 | 1905.6 | 1901.8 | 1909.2 | 1908.1 | 1901.0 | 1905.7 | 1905.7 | 1905.7 | 1903.9 | 1903.9 | 1903.9 |
| gdb 4368 | 1905.6 <sup>a</sup> | 1911.2 | 1917.9 | 1911.6 | 1918.3 | 1915.6 | 1907.5 | 1910.3 | 1910.3 | 1910.3 | 1912.3 | 1912.3 | 1912.3 |
| gdb 4369 | 1908.2 <sup>a</sup> | 1918.2 | 1915.7 | 1917.4 | 1917.2 | 1916.4 | 1910.4 | 1916.9 | 1916.9 | 1916.9 | 1918.2 | 1918.2 | 1918.2 |
| gdb 4370 | 1901.9 <sup>a</sup> | 1907.1 | 1902.0 | 1906.5 | 1910.1 | 1908.3 | 1901.5 | 1911.8 | 1911.8 | 1911.8 | 1909.8 | 1909.7 | 1909.7 |
| gdb 4371 | 1873.4 <sup>a</sup> | 1880.3 | 1868.5 | 1870.0 | 1878.1 | 1875.5 | 1870.4 | 1874.8 | 1874.8 | 1874.8 | 1867.2 | 1867.2 | 1867.2 |
| gdb 4372 | 1880.1 <sup>a</sup> | 1891.0 | 1880.0 | 1878.8 | 1882.6 | 1881.1 | 1880.1 | 1879.3 | 1879.3 | 1879.3 | 1875.0 | 1875.0 | 1875.0 |
| gdb 4373 | 1869.2 <sup>a</sup> | 1878.8 | 1883.9 | 1879.3 | 1878.9 | 1874.5 | 1869.1 | 1875.8 | 1875.8 | 1875.8 | 1872.4 | 1872.4 | 1872.4 |
| gdb 4374 | 1868.8 <sup>a</sup> | 1880.5 | 1883.0 | 1878.6 | 1877.1 | 1873.0 | 1871.0 | 1876.2 | 1876.2 | 1876.2 | 1872.2 | 1872.2 | 1872.2 |
| gdb 4375 | 1871.5 <sup>a</sup> | 1881.2 | 1886.6 | 1881.6 | 1882.6 | 1878.1 | 1870.6 | 1877.4 | 1877.4 | 1877.4 | 1874.4 | 1874.4 | 1874.4 |
| gdb 4376 | 1879.1 <sup>a</sup> | 1892.0 | 1897.0 | 1888.0 | 1886.3 | 1882.7 | 1883.6 | 1883.5 | 1883.5 | 1883.5 | 1883.2 | 1883.2 | 1883.2 |
| gdb 4377 | 1871.0 <sup>a</sup> | 1877.9 | 1879.4 | 1877.9 | 1879.2 | 1874.7 | 1870.3 | 1879.6 | 1879.6 | 1879.6 | 1875.3 | 1875.3 | 1875.3 |
| gdb 4378 | 1872.1 <sup>a</sup> | 1877.5 | 1879.9 | 1879.1 | 1880.2 | 1875.4 | 1869.8 | 1878.6 | 1878.6 | 1878.6 | 1874.9 | 1874.9 | 1874.9 |
| gdb 4379 | 1871.4 <sup>a</sup> | 1875.9 | 1873.4 | 1875.1 | 1879.0 | 1873.6 | 1867.3 | 1882.7 | 1882.7 | 1882.7 | 1872.2 | 1872.2 | 1872.2 |
| gdb 4380 | 1870.7 <sup>a</sup> | 1875.8 | 1875.8 | 1876.1 | 1880.4 | 1874.4 | 1866.7 | 1882.0 | 1882.0 | 1882.0 | 1871.5 | 1871.5 | 1871.5 |
| gdb 4381 | 1879.6 <sup>a</sup> | 1887.3 | 1894.1 | 1889.5 | 1890.5 | 1886.5 | 1881.5 | 1887.9 | 1887.9 | 1887.9 | 1886.8 | 1886.8 | 1886.8 |
| gdb 4382 | 1910.3 <sup>a</sup> | 1919.8 | 1917.5 | 1918.2 | 1914.9 | 1914.9 | 1913.1 | 1916.0 | 1915.9 | 1915.9 | 1916.8 | 1916.8 | 1916.8 |
| gdb 4383 | 1899.6 <sup>a</sup> | 1908.9 | 1903.9 | 1907.7 | 1908.1 | 1906.3 | 1901.7 | 1909.6 | 1909.6 | 1909.6 | 1907.7 | 1907.7 | 1907.7 |
| gdb 4384 | 1915.6 <sup>a</sup> | 1919.7 | 1920.4 | 1917.9 | 1920.2 | 1919.4 | 1913.7 | 1919.5 | 1919.5 | 1919.5 | 1920.0 | 1920.0 | 1920.0 |
| gdb 4385 | 1907.3 <sup>a</sup> | 1907.9 | 1908.2 | 1908.6 | 1913.2 | 1912.6 | 1902.9 | 1913.1 | 1913.1 | 1913.1 | 1910.1 | 1910.1 | 1910.1 |
| gdb 4386 | 1871.2 <sup>a</sup> | 1881.8 | 1885.0 | 1879.6 | 1880.8 | 1876.2 | 1872.8 | 1877.2 | 1877.1 | 1877.1 | 1873.8 | 1873.7 | 1873.7 |
| gdb 4387 | 1879.6 <sup>a</sup> | 1889.4 | 1897.2 | 1888.9 | 1888.7 | 1885.2 | 1882.4 | 1884.1 | 1884.1 | 1884.1 | 1884.0 | 1883.9 | 1883.9 |
| gdb 4388 | 1908.2 <sup>a</sup> | 1919.2 | 1917.2 | 1918.8 | 1913.3 | 1913.4 | 1910.1 | 1913.8 | 1913.8 | 1913.8 | 1915.3 | 1915.3 | 1915.3 |
| gdb 4389 | 1901.6 <sup>a</sup> | 1908.6 | 1903.0 | 1907.6 | 1905.8 | 1904.9 | 1900.5 | 1908.1 | 1908.1 | 1908.1 | 1906.0 | 1906.0 | 1906.0 |
| gdb 4390 | 1903.2 <sup>a</sup> | 1906.9 | 1908.9 | 1906.5 | 1905.3 | 1905.3 | 1901.6 | 1904.7 | 1904.7 | 1904.7 | 1902.9 | 1902.9 | 1902.9 |
| gdb 4391 | 1910.8 <sup>a</sup> | 1916.9 | 1922.1 | 1916.9 | 1913.5 | 1913.6 | 1910.2 | 1910.8 | 1910.8 | 1910.8 | 1913.0 | 1913.0 | 1913.0 |
| gdb 4392 | 1916.4 <sup>a</sup> | 1922.1 | 1924.0 | 1926.1 | 1919.6 | 1922.0 | 1925.6 | 1928.0 | 1928.0 | 1928.0 | 1930.2 | 1930.2 | 1930.2 |
| gdb 4393 | 1895.5 <sup>a</sup> | 1901.7 | 1905.5 | 1902.4 | 1901.1 | 1901.7 | 1899.0 | 1901.5 | 1901.5 | 1901.5 | 1899.3 | 1899.3 | 1899.3 |
| gdb 4394 | 1897.2 <sup>a</sup> | 1902.0 | 1905.6 | 1902.6 | 1903.2 | 1903.2 | 1900.0 | 1902.2 | 1902.1 | 1902.1 | 1900.1 | 1900.1 | 1900.1 |
| gdb 4395 | 1903.1 <sup>a</sup> | 1911.5 | 1917.5 | 1912.0 | 1909.6 | 1909.4 | 1907.2 | 1906.7 | 1906.7 | 1906.7 | 1908.3 | 1908.3 | 1908.3 |
| gdb 4396 | 1870.0 <sup>a</sup> | 1880.9 | 1883.0 | 1878.2 | 1880.5 | 1874.1 | 1869.4 | 1875.8 | 1875.7 | 1875.7 | 1867.5 | 1867.5 | 1867.5 |
| gdb 4397 | 1870.1 <sup>a</sup> | 1880.6 | 1882.5 | 1877.4 | 1881.4 | 1873.4 | 1873.4 | 1875.0 | 1875.0 | 1875.0 | 1867.2 | 1867.2 | 1867.2 |
| gdb 4398 | 1869.6 <sup>a</sup> | 1883.2 | 1886.2 | 1881.3 | 1879.2 | 1874.7 | 1872.3 | 1873.0 | 1872.9 | 1872.9 | 1871.1 | 1871.1 | 1871.1 |
| gdb 4399 | 1864.2 <sup>a</sup> | 1869.0 | 1873.4 | 1867.7 | 1869.8 | 1865.3 | 1858.9 | 1864.7 | 1864.7 | 1864.7 | 1858.4 | 1858.4 | 1858.4 |
| gdb 4400 | 1864.3 <sup>a</sup> | 1871.8 | 1875.8 | 1870.2 | 1869.9 | 1865.2 | 1860.7 | 1866.3 | 1866.3 | 1866.3 | 1857.8 | 1857.8 | 1857.8 |
| gdb 4401 | 1871.0 <sup>a</sup> | 1875.1 | 1881.2 | 1872.8 | 1875.8 | 1870.9 | 1864.7 | 1870.7 | 1870.7 | 1870.7 | 1862.8 | 1862.8 | 1862.8 |
| gdb 4402 | 1870.9 <sup>a</sup> | 1878.8 | 1884.5 | 1876.5 | 1876.8 | 1872.3 | 1870.2 | 1871.8 | 1871.8 | 1871.8 | 1868.8 | 1868.8 | 1868.8 |
| gdb 4403 | 1895.4 <sup>a</sup> | 1905.2 | 1902.3 | 1904.0 | 1903.6 | 1902.3 | 1899.2 | 1902.9 | 1902.9 | 1902.9 | 1902.3 | 1902.3 | 1902.3 |
| gdb 4404 | 1902.3 <sup>a</sup> | 1916.0 | 1916.3 | 1915.3 | 1912.0 | 1911.2 | 1908.8 | 1908.6 | 1908.6 | 1908.6 | 1911.3 | 1911.3 | 1911.3 |
| gdb 4405 | 1859.0 <sup>a</sup> | 1866.9 | 1859.2 | 1863.7 | 1865.4 | 1859.3 | 1850.9 | 1855.6 | 1855.6 | 1855.6 | 1852.0 | 1852.0 | 1852.0 |
| gdb 4406 | 1857.1 <sup>a</sup> | 1867.4 | 1859.2 | 1864.1 | 1864.8 | 1858.7 | 1849.8 | 1854.7 | 1854.7 | 1854.7 | 1851.8 | 1851.8 | 1851.8 |
| gdb 4407 | 1865.1 <sup>a</sup> | 1879.7 | 1874.2 | 1875.6 | 1875.8 | 1871.1 | 1866.6 | 1868.9 | 1868.8 | 1868.8 | 1867.5 | 1867.5 | 1867.5 |
| gdb 4408 | 1892.5 <sup>a</sup> | 1902.6 | 1898.1 | 1907.9 | 1898.2 | 1899.7 | 1901.4 | 1903.4 | 1903.4 | 1903.4 | 1903.8 | 1903.8 | 1903.8 |
| gdb 4409 | 1834.6 <sup>a</sup> | 1831.4 | 1790.8 | 1813.9 | 1834.2 | 1816.4 | 1808.9 | 1816.8 | 1816.8 | 1816.8 | 1811.7 | 1811.7 | 1811.7 |

. . . continued on next page . . .

Table S26: ... continued from previous page. ...

| Molecule | Ref.                | MNDO   | AMI    | PM3    | PM6    | PM7    | OM1    | OM2    |        |        | OM3    |        |        | D3T    |
|----------|---------------------|--------|--------|--------|--------|--------|--------|--------|--------|--------|--------|--------|--------|--------|
|          |                     |        |        |        |        |        |        | D2     | D3     | D3T    | D2     | D3     | D3T    |        |
| gdb 4410 | 1830.8 <sup>a</sup> | 1830.2 | 1790.8 | 1813.4 | 1834.9 | 1815.9 | 1807.4 | 1814.6 | 1814.6 | 1814.6 | 1810.2 | 1810.2 | 1810.2 | 1810.2 |
| gdb 4411 | 1837.6 <sup>a</sup> | 1843.4 | 1806.7 | 1825.8 | 1843.7 | 1826.6 | 1823.5 | 1827.2 | 1827.1 | 1827.1 | 1825.0 | 1825.0 | 1825.0 | 1825.0 |
| gdb 4412 | 1846.2 <sup>a</sup> | 1846.7 | 1807.9 | 1828.1 | 1842.1 | 1826.1 | 1820.9 | 1825.4 | 1825.3 | 1825.3 | 1824.9 | 1824.9 | 1824.9 | 1824.9 |
| gdb 4413 | 1839.5 <sup>a</sup> | 1857.5 | 1822.3 | 1840.2 | 1850.9 | 1838.8 | 1822.0 | 1821.8 | 1821.8 | 1821.8 | 1819.8 | 1819.8 | 1819.8 | 1819.8 |
| gdb 4414 | 1840.9 <sup>a</sup> | 1858.3 | 1825.3 | 1842.0 | 1856.3 | 1842.2 | 1826.1 | 1826.7 | 1826.7 | 1826.7 | 1823.7 | 1823.7 | 1823.7 | 1823.7 |
| gdb 4415 | 1847.6 <sup>a</sup> | 1871.1 | 1842.4 | 1856.0 | 1867.2 | 1854.3 | 1840.9 | 1839.3 | 1839.3 | 1839.3 | 1839.1 | 1839.1 | 1839.1 | 1839.1 |
| gdb 4416 | 1852.0 <sup>a</sup> | 1875.0 | 1843.6 | 1857.5 | 1865.5 | 1854.7 | 1843.1 | 1841.7 | 1841.7 | 1841.7 | 1841.6 | 1841.6 | 1841.6 | 1841.6 |
| gdb 4417 | 1902.4 <sup>a</sup> | 1907.9 | 1881.6 | 1900.1 | 1908.3 | 1898.5 | 1888.3 | 1891.2 | 1891.2 | 1891.2 | 1889.8 | 1889.8 | 1889.8 | 1889.8 |
| gdb 4418 | 1880.8 <sup>a</sup> | 1901.0 | 1876.6 | 1893.8 | 1901.0 | 1890.9 | 1878.0 | 1883.3 | 1883.3 | 1883.3 | 1882.7 | 1882.7 | 1882.7 | 1882.7 |
| gdb 4419 | 1879.1 <sup>a</sup> | 1900.1 | 1876.9 | 1893.0 | 1899.8 | 1889.5 | 1876.1 | 1881.2 | 1881.2 | 1881.2 | 1880.7 | 1880.7 | 1880.7 | 1880.7 |
| gdb 4420 | 1885.4 <sup>a</sup> | 1912.1 | 1893.7 | 1906.6 | 1910.7 | 1901.2 | 1890.8 | 1893.0 | 1893.0 | 1893.0 | 1894.7 | 1894.7 | 1894.7 | 1894.7 |
| gdb 4421 | 1873.5 <sup>a</sup> | 1887.1 | 1865.3 | 1878.6 | 1876.8 | 1875.8 | 1875.1 | 1876.2 | 1876.2 | 1876.2 | 1872.1 | 1872.1 | 1872.1 | 1872.1 |
| gdb 4422 | 1870.8 <sup>a</sup> | 1885.2 | 1863.1 | 1876.3 | 1879.8 | 1873.7 | 1869.0 | 1868.6 | 1868.5 | 1868.5 | 1869.2 | 1869.1 | 1869.1 | 1869.1 |
| gdb 4423 | 1872.4 <sup>a</sup> | 1885.7 | 1864.3 | 1876.3 | 1880.8 | 1874.1 | 1871.9 | 1872.6 | 1872.5 | 1872.5 | 1871.5 | 1871.5 | 1871.5 | 1871.5 |
| gdb 4424 | 1881.0 <sup>a</sup> | 1898.7 | 1880.1 | 1888.2 | 1889.9 | 1885.0 | 1885.0 | 1885.4 | 1885.4 | 1885.4 | 1886.6 | 1886.6 | 1886.6 | 1886.6 |
| gdb 4425 | 1849.1 <sup>a</sup> | 1858.5 | 1826.7 | 1845.2 | 1854.4 | 1846.3 | 1835.8 | 1840.6 | 1840.6 | 1840.6 | 1833.1 | 1833.1 | 1833.1 | 1833.1 |
| gdb 4426 | 1848.7 <sup>a</sup> | 1858.3 | 1828.3 | 1845.6 | 1857.3 | 1847.7 | 1836.3 | 1840.8 | 1840.8 | 1840.8 | 1833.5 | 1833.5 | 1833.5 | 1833.5 |
| gdb 4427 | 1847.7 <sup>a</sup> | 1857.3 | 1824.3 | 1842.9 | 1857.7 | 1845.3 | 1830.0 | 1834.0 | 1834.0 | 1834.0 | 1830.5 | 1830.4 | 1830.5 | 1830.5 |
| gdb 4428 | 1854.1 <sup>a</sup> | 1870.2 | 1843.1 | 1859.3 | 1864.8 | 1856.8 | 1850.4 | 1851.8 | 1851.8 | 1851.8 | 1846.6 | 1846.6 | 1846.6 | 1846.6 |
| gdb 4429 | 1854.7 <sup>a</sup> | 1870.3 | 1842.0 | 1857.0 | 1869.8 | 1857.9 | 1845.2 | 1846.7 | 1846.7 | 1846.7 | 1845.8 | 1845.7 | 1845.7 | 1845.7 |
| gdb 4430 | 1856.5 <sup>a</sup> | 1873.9 | 1845.9 | 1859.6 | 1869.7 | 1858.1 | 1847.6 | 1850.4 | 1850.4 | 1850.4 | 1848.4 | 1848.3 | 1848.3 | 1848.3 |
| gdb 4431 | 1883.5 <sup>a</sup> | 1900.6 | 1887.4 | 1891.5 | 1896.3 | 1890.5 | 1882.4 | 1884.9 | 1884.9 | 1884.9 | 1882.2 | 1882.1 | 1882.1 | 1882.1 |
| gdb 4432 | 1897.8 <sup>a</sup> | 1907.7 | 1882.7 | 1898.6 | 1904.8 | 1894.4 | 1885.5 | 1887.4 | 1887.4 | 1887.4 | 1885.2 | 1885.2 | 1885.2 | 1885.2 |
| gdb 4433 | 1879.7 <sup>a</sup> | 1900.5 | 1873.9 | 1889.9 | 1892.6 | 1885.1 | 1876.4 | 1880.9 | 1880.9 | 1880.9 | 1879.3 | 1879.3 | 1879.3 | 1879.3 |
| gdb 4434 | 1879.0 <sup>a</sup> | 1901.5 | 1874.2 | 1890.8 | 1895.0 | 1886.9 | 1877.7 | 1881.8 | 1881.8 | 1881.8 | 1880.0 | 1880.0 | 1880.0 | 1880.0 |
| gdb 4435 | 1878.9 <sup>a</sup> | 1900.6 | 1875.6 | 1891.3 | 1896.8 | 1887.7 | 1876.5 | 1880.1 | 1880.1 | 1880.1 | 1878.8 | 1878.8 | 1878.8 | 1878.8 |
| gdb 4436 | 1885.1 <sup>a</sup> | 1913.2 | 1893.0 | 1905.3 | 1908.2 | 1900.0 | 1890.6 | 1892.7 | 1892.7 | 1892.7 | 1893.7 | 1893.7 | 1893.7 | 1893.7 |
| gdb 4437 | 1877.8 <sup>a</sup> | 1891.1 | 1874.5 | 1881.2 | 1889.5 | 1882.7 | 1872.1 | 1879.3 | 1879.3 | 1879.3 | 1873.3 | 1873.3 | 1873.3 | 1873.3 |
| gdb 4438 | 1884.7 <sup>a</sup> | 1904.0 | 1892.1 | 1895.5 | 1901.7 | 1895.3 | 1887.0 | 1891.6 | 1891.6 | 1891.6 | 1888.1 | 1888.1 | 1888.1 | 1888.1 |
| gdb 4439 | 1883.4 <sup>a</sup> | 1901.8 | 1885.2 | 1890.0 | 1893.2 | 1887.8 | 1880.9 | 1882.8 | 1882.8 | 1882.8 | 1879.9 | 1879.9 | 1879.9 | 1879.9 |
| gdb 4440 | 1893.1 <sup>a</sup> | 1908.2 | 1897.5 | 1907.8 | 1898.1 | 1900.0 | 1902.0 | 1901.9 | 1901.9 | 1901.9 | 1903.6 | 1903.6 | 1903.6 | 1903.6 |
| gdb 4441 | 1840.6 <sup>a</sup> | 1858.4 | 1846.1 | 1848.5 | 1849.5 | 1843.8 | 1838.5 | 1838.6 | 1838.5 | 1838.5 | 1833.1 | 1833.1 | 1833.1 | 1833.1 |
| gdb 4442 | 1847.5 <sup>a</sup> | 1872.2 | 1867.0 | 1865.6 | 1865.5 | 1859.4 | 1854.2 | 1853.6 | 1853.5 | 1853.5 | 1850.4 | 1850.3 | 1850.4 | 1850.4 |
| gdb 4443 | 1852.5 <sup>a</sup> | 1871.5 | 1863.3 | 1862.8 | 1861.2 | 1855.2 | 1851.2 | 1849.0 | 1849.0 | 1849.0 | 1846.9 | 1846.9 | 1846.9 | 1846.9 |
| gdb 4444 | 1896.3 <sup>a</sup> | 1893.1 | 1884.1 | 1890.4 | 1886.0 | 1888.0 | 1891.7 | 1894.2 | 1894.2 | 1894.2 | 1890.5 | 1890.5 | 1890.5 | 1890.5 |
| gdb 4445 | 1889.1 <sup>a</sup> | 1893.0 | 1885.5 | 1891.0 | 1891.2 | 1888.4 | 1889.1 | 1893.4 | 1893.4 | 1893.4 | 1892.7 | 1892.7 | 1892.7 | 1892.7 |
| gdb 4446 | 1894.0 <sup>a</sup> | 1893.8 | 1888.5 | 1892.1 | 1895.2 | 1891.1 | 1891.9 | 1896.7 | 1896.5 | 1896.5 | 1895.1 | 1895.1 | 1895.1 | 1895.1 |
| gdb 4447 | 1900.2 <sup>a</sup> | 1904.5 | 1902.3 | 1903.3 | 1903.0 | 1899.4 | 1901.6 | 1902.6 | 1902.6 | 1902.6 | 1904.7 | 1904.7 | 1904.7 | 1904.7 |
| gdb 4448 | 1895.3 <sup>a</sup> | 1899.0 | 1888.5 | 1894.5 | 1893.8 | 1894.8 | 1895.5 | 1900.1 | 1900.1 | 1900.1 | 1896.3 | 1896.3 | 1896.3 | 1896.3 |
| gdb 4449 | 1893.9 <sup>a</sup> | 1900.1 | 1888.6 | 1895.2 | 1899.5 | 1897.0 | 1894.8 | 1899.7 | 1899.7 | 1899.7 | 1899.8 | 1899.7 | 1899.8 | 1899.8 |
| gdb 4450 | 1894.2 <sup>a</sup> | 1901.4 | 1891.7 | 1896.9 | 1903.0 | 1899.2 | 1898.0 | 1904.4 | 1904.4 | 1904.4 | 1902.7 | 1902.7 | 1902.7 | 1902.7 |
| gdb 4451 | 1903.3 <sup>a</sup> | 1911.2 | 1903.5 | 1905.4 | 1907.4 | 1904.9 | 1907.7 | 1909.3 | 1909.3 | 1909.3 | 1910.7 | 1910.7 | 1910.7 | 1910.7 |
| gdb 4452 | 1877.8 <sup>a</sup> | 1878.0 | 1871.4 | 1871.0 | 1879.6 | 1877.8 | 1869.5 | 1874.7 | 1874.7 | 1874.7 | 1866.4 | 1866.4 | 1866.4 | 1866.4 |
| gdb 4453 | 1886.0 <sup>a</sup> | 1888.1 | 1884.4 | 1881.3 | 1888.7 | 1886.2 | 1878.4 | 1881.3 | 1881.3 | 1881.3 | 1876.6 | 1876.6 | 1876.6 | 1876.6 |
| gdb 4454 | 1881.4 <sup>a</sup> | 1889.1 | 1883.9 | 1881.7 | 1892.3 | 1887.7 | 1876.5 | 1879.1 | 1879.1 | 1879.1 | 1877.7 | 1877.7 | 1877.7 | 1877.7 |

... continued on next page ...

Table S26: ... continued from previous page. ...

| Molecule | Ref.                | MNDO   | AMI    | PM3    | PM6    | PM7    | OM1    |        | OM2    |        | OM3    |        | D3T    |
|----------|---------------------|--------|--------|--------|--------|--------|--------|--------|--------|--------|--------|--------|--------|
|          |                     |        |        |        |        |        | D2     | D3     | D2     | D3     | D2     | D3     |        |
| gdb 4455 | 1829.4 <sup>a</sup> | 1811.3 | 1789.6 | 1804.5 | 1829.5 | 1812.1 | 1805.1 | 1817.0 | 1817.0 | 1817.0 | 1813.5 | 1813.5 | 1813.5 |
| gdb 4456 | 1837.1 <sup>a</sup> | 1827.4 | 1806.9 | 1820.3 | 1840.9 | 1824.4 | 1817.5 | 1825.4 | 1825.4 | 1825.4 | 1825.5 | 1825.5 | 1825.5 |
| gdb 4457 | 1844.1 <sup>a</sup> | 1835.7 | 1809.5 | 1821.9 | 1837.4 | 1822.4 | 1821.2 | 1828.3 | 1828.3 | 1828.3 | 1827.9 | 1827.9 | 1827.9 |
| gdb 4458 | 1847.6 <sup>a</sup> | 1823.1 | 1836.7 | 1836.7 | 1848.4 | 1837.9 | 1826.5 | 1834.8 | 1834.8 | 1834.8 | 1833.1 | 1833.1 | 1833.1 |
| gdb 4459 | 1854.4 <sup>a</sup> | 1846.9 | 1828.9 | 1840.2 | 1856.5 | 1844.6 | 1833.7 | 1841.3 | 1841.3 | 1841.3 | 1839.0 | 1839.0 | 1839.0 |
| gdb 4460 | 1855.2 <sup>a</sup> | 1847.3 | 1828.8 | 1839.9 | 1856.2 | 1844.6 | 1834.4 | 1841.7 | 1841.7 | 1841.7 | 1839.4 | 1839.4 | 1839.4 |
| gdb 4461 | 1860.4 <sup>a</sup> | 1850.0 | 1829.4 | 1842.6 | 1855.0 | 1849.2 | 1842.9 | 1853.5 | 1853.5 | 1853.5 | 1846.4 | 1846.4 | 1846.4 |
| gdb 4462 | 1860.9 <sup>a</sup> | 1862.0 | 1842.2 | 1854.2 | 1862.9 | 1852.1 | 1844.6 | 1846.0 | 1846.0 | 1846.0 | 1847.2 | 1847.2 | 1847.2 |
| gdb 4463 | 1862.7 <sup>a</sup> | 1863.3 | 1845.3 | 1854.0 | 1864.6 | 1854.1 | 1845.9 | 1847.6 | 1847.6 | 1847.6 | 1848.6 | 1848.6 | 1848.6 |
| gdb 4464 | 1869.0 <sup>a</sup> | 1866.1 | 1846.9 | 1857.7 | 1865.8 | 1860.6 | 1855.7 | 1861.9 | 1861.9 | 1861.9 | 1858.2 | 1858.2 | 1858.2 |
| gdb 4465 | 1859.5 <sup>a</sup> | 1867.5 | 1848.6 | 1858.5 | 1866.5 | 1856.7 | 1850.5 | 1855.6 | 1855.6 | 1855.6 | 1855.0 | 1854.9 | 1854.9 |
| gdb 4466 | 1885.4 <sup>a</sup> | 1899.8 | 1890.6 | 1891.2 | 1898.0 | 1890.8 | 1884.4 | 1892.2 | 1892.2 | 1892.2 | 1887.6 | 1887.6 | 1887.6 |
| gdb 4467 | 1893.7 <sup>a</sup> | 1914.1 | 1906.8 | 1904.9 | 1907.6 | 1901.5 | 1895.7 | 1899.6 | 1899.6 | 1899.6 | 1898.4 | 1898.4 | 1898.4 |
| gdb 4468 | 1885.8 <sup>a</sup> | 1896.5 | 1890.7 | 1889.7 | 1898.3 | 1892.5 | 1884.5 | 1892.3 | 1892.3 | 1892.3 | 1887.2 | 1887.1 | 1887.1 |
| gdb 4469 | 1892.3 <sup>a</sup> | 1911.4 | 1902.3 | 1899.0 | 1907.3 | 1896.5 | 1894.2 | 1896.2 | 1896.2 | 1896.2 | 1894.4 | 1894.3 | 1894.3 |
| gdb 4470 | 1886.7 <sup>a</sup> | 1893.3 | 1888.9 | 1892.0 | 1892.7 | 1888.2 | 1888.5 | 1890.0 | 1890.0 | 1890.0 | 1890.1 | 1890.1 | 1890.1 |
| gdb 4471 | 1892.3 <sup>a</sup> | 1893.3 | 1890.0 | 1892.3 | 1895.2 | 1890.7 | 1893.0 | 1895.4 | 1895.4 | 1895.4 | 1894.9 | 1894.9 | 1894.9 |
| gdb 4472 | 1898.3 <sup>a</sup> | 1905.2 | 1901.9 | 1901.4 | 1900.3 | 1896.6 | 1903.0 | 1900.0 | 1900.0 | 1900.0 | 1902.6 | 1902.6 | 1902.6 |
| gdb 4473 | 1921.0 <sup>a</sup> | 1916.8 | 1904.6 | 1913.0 | 1918.0 | 1910.6 | 1906.1 | 1907.7 | 1907.7 | 1907.7 | 1906.4 | 1906.4 | 1906.4 |
| gdb 4474 | 1894.4 <sup>a</sup> | 1912.2 | 1900.8 | 1907.9 | 1909.1 | 1902.8 | 1897.2 | 1902.5 | 1902.5 | 1902.5 | 1901.3 | 1901.2 | 1901.2 |
| gdb 4475 | 1898.2 <sup>a</sup> | 1912.6 | 1902.3 | 1908.8 | 1914.2 | 1906.9 | 1899.6 | 1905.1 | 1905.1 | 1905.1 | 1904.2 | 1904.2 | 1904.2 |
| gdb 4476 | 1903.9 <sup>a</sup> | 1922.5 | 1915.3 | 1919.0 | 1921.4 | 1914.9 | 1909.1 | 1911.0 | 1911.0 | 1911.0 | 1913.4 | 1913.3 | 1913.3 |
| gdb 4477 | 1828.9 <sup>a</sup> | 1811.8 | 1787.3 | 1803.6 | 1825.2 | 1808.9 | 1803.4 | 1814.2 | 1814.2 | 1814.2 | 1811.0 | 1811.0 | 1811.0 |
| gdb 4478 | 1838.9 <sup>a</sup> | 1823.9 | 1799.3 | 1812.6 | 1836.2 | 1821.1 | 1815.0 | 1827.9 | 1827.9 | 1827.9 | 1822.2 | 1822.1 | 1822.1 |
| gdb 4479 | 1845.9 <sup>a</sup> | 1838.4 | 1812.7 | 1823.9 | 1842.3 | 1828.5 | 1827.6 | 1834.5 | 1834.5 | 1834.5 | 1831.9 | 1831.9 | 1831.9 |
| gdb 4480 | 1845.4 <sup>a</sup> | 1837.0 | 1813.5 | 1824.4 | 1840.1 | 1825.5 | 1822.4 | 1829.7 | 1829.7 | 1829.7 | 1829.8 | 1829.8 | 1829.8 |
| gdb 4481 | 1859.8 <sup>a</sup> | 1865.8 | 1851.2 | 1858.3 | 1871.3 | 1860.9 | 1844.2 | 1847.7 | 1847.7 | 1847.7 | 1844.4 | 1844.4 | 1844.4 |
| gdb 4482 | 1861.5 <sup>a</sup> | 1867.1 | 1850.4 | 1856.9 | 1870.4 | 1860.6 | 1848.1 | 1851.0 | 1851.0 | 1851.0 | 1847.7 | 1847.7 | 1847.7 |
| gdb 4483 | 1871.7 <sup>a</sup> | 1878.7 | 1865.5 | 1868.4 | 1881.4 | 1871.1 | 1860.2 | 1859.8 | 1859.8 | 1859.8 | 1860.1 | 1860.1 | 1860.1 |
| gdb 4484 | 1868.6 <sup>a</sup> | 1880.3 | 1870.0 | 1873.2 | 1883.6 | 1873.2 | 1863.5 | 1861.6 | 1861.6 | 1861.6 | 1860.8 | 1860.8 | 1860.8 |
| gdb 4485 | 1850.8 <sup>a</sup> | 1844.8 | 1822.9 | 1834.0 | 1852.4 | 1836.5 | 1828.9 | 1837.8 | 1837.8 | 1837.8 | 1832.9 | 1832.9 | 1832.9 |
| gdb 4486 | 1850.8 <sup>a</sup> | 1844.1 | 1821.1 | 1832.0 | 1853.0 | 1836.9 | 1831.2 | 1838.6 | 1838.6 | 1838.6 | 1834.7 | 1834.7 | 1834.7 |
| gdb 4487 | 1857.6 <sup>a</sup> | 1854.1 | 1831.5 | 1839.3 | 1857.9 | 1842.0 | 1841.2 | 1844.0 | 1844.0 | 1844.0 | 1843.2 | 1843.2 | 1843.2 |
| gdb 4488 | 1863.3 <sup>a</sup> | 1859.7 | 1836.7 | 1845.2 | 1861.8 | 1845.4 | 1842.8 | 1846.8 | 1846.8 | 1846.8 | 1846.0 | 1846.0 | 1846.0 |
| gdb 4489 | 1829.6 <sup>a</sup> | 1819.8 | 1805.2 | 1813.9 | 1827.9 | 1819.5 | 1813.6 | 1818.8 | 1818.8 | 1818.8 | 1814.5 | 1814.5 | 1814.5 |
| gdb 4490 | 1868.4 <sup>a</sup> | 1870.2 | 1855.3 | 1863.0 | 1873.6 | 1866.5 | 1860.2 | 1865.6 | 1865.6 | 1865.6 | 1858.7 | 1858.7 | 1858.7 |
| gdb 4491 | 1874.0 <sup>a</sup> | 1880.4 | 1865.5 | 1870.0 | 1877.7 | 1871.8 | 1870.2 | 1870.4 | 1870.4 | 1870.4 | 1866.1 | 1866.1 | 1866.1 |
| gdb 4492 | 1837.6 <sup>a</sup> | 1835.9 | 1821.3 | 1825.3 | 1840.0 | 1829.1 | 1825.9 | 1827.3 | 1827.3 | 1827.3 | 1828.4 | 1828.4 | 1828.4 |
| gdb 4493 | 1901.8 <sup>a</sup> | 1914.3 | 1915.4 | 1910.6 | 1914.2 | 1909.5 | 1903.0 | 1907.1 | 1907.1 | 1907.1 | 1905.1 | 1905.1 | 1905.1 |
| gdb 4494 | 1921.0 <sup>a</sup> | 1916.7 | 1904.6 | 1913.0 | 1918.1 | 1910.5 | 1905.8 | 1907.4 | 1907.3 | 1907.3 | 1906.3 | 1906.3 | 1906.3 |
| gdb 4495 | 1897.3 <sup>a</sup> | 1913.1 | 1902.8 | 1909.5 | 1913.7 | 1906.4 | 1899.6 | 1904.9 | 1904.9 | 1904.9 | 1904.0 | 1904.0 | 1904.0 |
| gdb 4496 | 1898.1 <sup>a</sup> | 1912.6 | 1902.3 | 1908.8 | 1914.3 | 1906.9 | 1899.6 | 1905.1 | 1905.1 | 1905.1 | 1904.2 | 1904.2 | 1904.2 |
| gdb 4497 | 1904.6 <sup>a</sup> | 1923.0 | 1913.8 | 1916.9 | 1919.2 | 1912.5 | 1909.8 | 1910.2 | 1910.2 | 1910.2 | 1912.2 | 1912.2 | 1912.2 |
| gdb 4498 | 1896.7 <sup>a</sup> | 1892.3 | 1883.7 | 1890.1 | 1886.2 | 1888.1 | 1891.7 | 1894.4 | 1894.4 | 1894.4 | 1890.6 | 1890.6 | 1890.6 |
| gdb 4499 | 1887.6 <sup>a</sup> | 1891.3 | 1886.3 | 1891.0 | 1892.1 | 1888.3 | 1886.4 | 1891.6 | 1891.6 | 1891.6 | 1890.1 | 1890.1 | 1890.1 |

... continued on next page ...

Table S26: . . . continued from previous page. . . .

| Molecule | Ref.                | MNDO   | AMI    | PM3    | PM6    | PM7    | OM1    |        | OM2    |        | OM3    |        | D3T    |
|----------|---------------------|--------|--------|--------|--------|--------|--------|--------|--------|--------|--------|--------|--------|
|          |                     |        |        |        |        |        | D2     | D3     | D2     | D3     | D2     | D3     |        |
| gdb 4500 | 1892.9 <sup>a</sup> | 1892.0 | 1886.6 | 1891.4 | 1894.4 | 1890.0 | 1890.6 | 1896.0 | 1896.0 | 1896.0 | 1894.3 | 1894.3 | 1894.3 |
| gdb 4501 | 1899.0 <sup>a</sup> | 1904.5 | 1901.9 | 1902.6 | 1903.6 | 1900.3 | 1902.7 | 1903.9 | 1903.9 | 1903.9 | 1905.4 | 1905.4 | 1905.4 |
| gdb 4502 | 1892.9 <sup>a</sup> | 1894.7 | 1885.3 | 1891.8 | 1897.0 | 1891.4 | 1886.6 | 1893.4 | 1893.4 | 1893.4 | 1891.5 | 1891.5 | 1891.5 |
| gdb 4503 | 1886.8 <sup>a</sup> | 1892.4 | 1887.0 | 1892.8 | 1898.0 | 1891.7 | 1884.3 | 1892.0 | 1892.0 | 1892.0 | 1890.3 | 1890.3 | 1890.3 |
| gdb 4504 | 1892.9 <sup>a</sup> | 1893.8 | 1887.7 | 1892.9 | 1902.5 | 1895.6 | 1887.4 | 1896.3 | 1896.3 | 1896.3 | 1894.5 | 1894.4 | 1894.4 |
| gdb 4505 | 1900.7 <sup>a</sup> | 1907.0 | 1902.8 | 1905.5 | 1910.5 | 1904.3 | 1899.0 | 1903.3 | 1903.2 | 1903.2 | 1904.9 | 1904.9 | 1904.9 |
| gdb 4506 | 1893.3 <sup>a</sup> | 1891.3 | 1895.8 | 1892.4 | 1902.5 | 1896.8 | 1885.9 | 1899.0 | 1899.0 | 1899.0 | 1889.0 | 1889.0 | 1889.0 |
| gdb 4507 | 1890.5 <sup>a</sup> | 1899.6 | 1887.8 | 1885.8 | 1897.5 | 1893.9 | 1883.7 | 1894.4 | 1894.4 | 1894.4 | 1887.3 | 1887.3 | 1887.3 |
| gdb 4508 | 1900.2 <sup>a</sup> | 1899.6 | 1904.0 | 1898.9 | 1908.6 | 1904.6 | 1896.1 | 1903.7 | 1903.7 | 1903.7 | 1899.8 | 1899.8 | 1899.8 |
| gdb 4509 | 1894.5 <sup>a</sup> | 1894.6 | 1902.8 | 1897.6 | 1904.8 | 1900.1 | 1889.5 | 1897.7 | 1897.7 | 1897.7 | 1894.2 | 1894.2 | 1894.2 |
| gdb 4510 | 1897.7 <sup>a</sup> | 1895.6 | 1889.8 | 1892.5 | 1894.9 | 1895.6 | 1894.8 | 1899.9 | 1899.9 | 1899.9 | 1895.2 | 1895.2 | 1895.2 |
| gdb 4511 | 1892.6 <sup>a</sup> | 1895.8 | 1892.3 | 1893.8 | 1902.3 | 1898.2 | 1892.6 | 1897.8 | 1897.8 | 1897.8 | 1896.4 | 1896.4 | 1896.4 |
| gdb 4512 | 1896.3 <sup>a</sup> | 1897.1 | 1893.0 | 1893.5 | 1902.6 | 1899.4 | 1896.9 | 1902.4 | 1902.3 | 1902.3 | 1900.1 | 1900.0 | 1900.0 |
| gdb 4513 | 1903.2 <sup>a</sup> | 1908.9 | 1904.3 | 1901.9 | 1907.9 | 1904.4 | 1905.2 | 1906.8 | 1906.8 | 1906.8 | 1907.8 | 1907.8 | 1907.8 |
| gdb 4514 | 1870.6 <sup>a</sup> | 1875.5 | 1868.5 | 1865.6 | 1877.4 | 1874.3 | 1866.3 | 1869.7 | 1869.7 | 1869.7 | 1861.8 | 1861.8 | 1861.8 |
| gdb 4515 | 1877.8 <sup>a</sup> | 1883.9 | 1881.3 | 1876.1 | 1886.0 | 1883.5 | 1875.9 | 1876.3 | 1876.3 | 1876.3 | 1871.7 | 1871.7 | 1871.7 |
| gdb 4516 | 1871.9 <sup>a</sup> | 1885.6 | 1878.4 | 1873.3 | 1883.6 | 1879.2 | 1873.7 | 1870.6 | 1870.6 | 1870.6 | 1869.8 | 1869.8 | 1869.8 |
| gdb 4517 | 1861.5 <sup>a</sup> | 1867.1 | 1850.2 | 1856.9 | 1870.7 | 1860.6 | 1847.7 | 1850.9 | 1850.9 | 1850.9 | 1847.6 | 1847.6 | 1847.6 |
| gdb 4518 | 1871.0 <sup>a</sup> | 1877.2 | 1864.0 | 1867.0 | 1881.3 | 1870.7 | 1861.8 | 1860.5 | 1860.5 | 1860.5 | 1860.7 | 1860.7 | 1860.7 |
| gdb 4519 | 1871.0 <sup>a</sup> | 1881.2 | 1872.0 | 1873.9 | 1887.0 | 1876.0 | 1864.3 | 1867.5 | 1867.5 | 1867.5 | 1866.3 | 1866.3 | 1866.3 |
| gdb 4520 | 1901.9 <sup>a</sup> | 1915.3 | 1916.9 | 1911.6 | 1916.2 | 1911.4 | 1904.6 | 1908.3 | 1908.3 | 1908.3 | 1906.5 | 1906.5 | 1906.5 |
| gdb 4521 | 1868.2 <sup>a</sup> | 1881.3 | 1869.9 | 1872.4 | 1884.9 | 1876.1 | 1861.7 | 1865.9 | 1865.9 | 1865.9 | 1860.3 | 1860.3 | 1860.3 |
| gdb 4522 | 1878.6 <sup>a</sup> | 1894.6 | 1884.8 | 1884.0 | 1894.1 | 1885.7 | 1872.6 | 1874.8 | 1874.8 | 1874.8 | 1872.9 | 1872.8 | 1872.8 |
| gdb 4523 | 1879.3 <sup>a</sup> | 1898.3 | 1888.6 | 1887.3 | 1896.1 | 1889.3 | 1877.4 | 1880.2 | 1880.2 | 1880.2 | 1877.7 | 1877.7 | 1877.7 |
| gdb 4524 | 1889.3 <sup>a</sup> | 1899.5 | 1893.5 | 1892.6 | 1898.0 | 1891.6 | 1885.0 | 1892.5 | 1892.5 | 1892.5 | 1885.7 | 1885.7 | 1885.7 |
| gdb 4525 | 1885.6 <sup>a</sup> | 1897.2 | 1891.2 | 1890.4 | 1898.7 | 1892.6 | 1884.6 | 1892.8 | 1892.8 | 1892.8 | 1887.6 | 1887.6 | 1887.6 |
| gdb 4526 | 1892.8 <sup>a</sup> | 1910.4 | 1906.5 | 1903.4 | 1908.0 | 1902.8 | 1896.5 | 1900.8 | 1900.8 | 1900.8 | 1898.9 | 1898.9 | 1898.9 |
| gdb 4527 | 1891.8 <sup>a</sup> | 1911.1 | 1904.1 | 1901.0 | 1903.0 | 1899.0 | 1896.3 | 1898.4 | 1898.4 | 1898.4 | 1896.5 | 1896.5 | 1896.5 |
| gdb 4528 | 1918.0 <sup>a</sup> | 1919.4 | 1921.5 | 1918.6 | 1918.5 | 1919.2 | 1914.3 | 1919.6 | 1919.6 | 1919.6 | 1920.1 | 1920.1 | 1920.1 |
| gdb 4529 | 1906.6 <sup>a</sup> | 1907.3 | 1907.1 | 1907.2 | 1910.2 | 1910.8 | 1902.2 | 1911.8 | 1911.8 | 1911.8 | 1908.7 | 1908.7 | 1908.7 |
| gdb 4530 | 1903.5 <sup>a</sup> | 1906.5 | 1908.7 | 1906.3 | 1904.8 | 1905.0 | 1901.2 | 1904.4 | 1904.4 | 1904.4 | 1903.0 | 1903.0 | 1903.0 |
| gdb 4531 | 1910.8 <sup>a</sup> | 1916.7 | 1921.8 | 1916.7 | 1913.1 | 1913.4 | 1910.1 | 1910.6 | 1910.6 | 1910.6 | 1912.8 | 1912.7 | 1912.7 |
| gdb 4532 | 1912.5 <sup>a</sup> | 1918.2 | 1915.8 | 1916.1 | 1917.9 | 1917.7 | 1913.6 | 1918.6 | 1918.6 | 1918.6 | 1919.1 | 1919.1 | 1919.1 |
| gdb 4533 | 1903.6 <sup>a</sup> | 1906.0 | 1900.9 | 1905.5 | 1910.0 | 1908.0 | 1900.7 | 1911.2 | 1911.2 | 1911.2 | 1908.9 | 1908.9 | 1908.9 |
| gdb 4534 | 1873.3 <sup>a</sup> | 1879.4 | 1868.0 | 1869.4 | 1878.1 | 1875.5 | 1870.3 | 1875.1 | 1875.0 | 1875.0 | 1867.4 | 1867.4 | 1867.4 |
| gdb 4535 | 1880.9 <sup>a</sup> | 1891.2 | 1882.3 | 1879.5 | 1885.4 | 1884.5 | 1883.0 | 1882.2 | 1882.1 | 1882.1 | 1877.4 | 1877.3 | 1877.3 |
| gdb 4536 | 1895.6 <sup>a</sup> | 1903.9 | 1901.7 | 1903.6 | 1903.5 | 1903.6 | 1899.2 | 1903.3 | 1903.2 | 1903.2 | 1902.3 | 1902.3 | 1902.3 |
| gdb 4537 | 1901.8 <sup>a</sup> | 1915.8 | 1916.5 | 1915.5 | 1911.4 | 1911.4 | 1909.6 | 1908.9 | 1908.9 | 1908.9 | 1911.6 | 1911.6 | 1911.6 |
| gdb 4538 | 1868.5 <sup>a</sup> | 1880.4 | 1868.8 | 1871.4 | 1884.4 | 1875.6 | 1859.4 | 1865.0 | 1864.9 | 1864.9 | 1859.6 | 1859.6 | 1859.6 |
| gdb 4539 | 1880.2 <sup>a</sup> | 1896.3 | 1884.1 | 1882.1 | 1892.0 | 1884.5 | 1874.7 | 1873.2 | 1873.1 | 1873.1 | 1871.8 | 1871.8 | 1871.8 |
| gdb 4540 | 1898.6 <sup>a</sup> | 1900.5 | 1905.2 | 1902.8 | 1910.2 | 1908.0 | 1898.1 | 1904.3 | 1904.3 | 1904.3 | 1902.3 | 1902.2 | 1902.2 |
| gdb 4541 | 1914.1 <sup>a</sup> | 1909.8 | 1913.2 | 1911.9 | 1917.9 | 1913.8 | 1907.8 | 1911.0 | 1911.0 | 1911.0 | 1908.4 | 1908.4 | 1908.4 |
| gdb 4542 | 1905.1 <sup>a</sup> | 1912.3 | 1918.7 | 1912.8 | 1918.3 | 1916.3 | 1908.5 | 1910.9 | 1910.9 | 1910.9 | 1912.6 | 1912.6 | 1912.6 |
| gdb 4543 | 1877.7 <sup>a</sup> | 1875.4 | 1870.0 | 1869.3 | 1878.6 | 1877.2 | 1869.4 | 1874.7 | 1874.7 | 1874.7 | 1866.1 | 1866.1 | 1866.1 |
| gdb 4544 | 1886.5 <sup>a</sup> | 1888.4 | 1884.7 | 1881.5 | 1888.6 | 1887.0 | 1880.0 | 1883.2 | 1883.2 | 1883.2 | 1878.0 | 1878.0 | 1878.0 |

. . . continued on next page. . . .



Table S26: . . . continued from previous page. . . .

| Molecule | Ref.                | MNDO   | AMI    | PM3    | PM6    | PM7    | OM1    | OM2    |        | OM3    |        | D3T    |
|----------|---------------------|--------|--------|--------|--------|--------|--------|--------|--------|--------|--------|--------|
|          |                     |        |        |        |        |        |        | D2     | D3     | D2     | D3     |        |
| gdb 4545 | 1896.1 <sup>a</sup> | 1899.9 | 1905.6 | 1903.4 | 1904.4 | 1904.0 | 1897.9 | 1901.0 | 1900.9 | 1899.2 | 1899.2 | 1899.2 |
| gdb 4546 | 1904.7 <sup>a</sup> | 1910.5 | 1916.2 | 1910.2 | 1910.8 | 1908.1 | 1909.2 | 1906.8 | 1906.8 | 1908.4 | 1908.4 | 1908.4 |
| gdb 4547 | 1866.9 <sup>a</sup> | 1877.0 | 1866.3 | 1863.9 | 1876.1 | 1873.2 | 1867.5 | 1867.1 | 1867.1 | 1859.2 | 1859.2 | 1859.2 |
| gdb 4548 | 1880.0 <sup>a</sup> | 1885.9 | 1882.2 | 1876.0 | 1885.9 | 1883.7 | 1879.6 | 1878.2 | 1878.2 | 1873.7 | 1873.6 | 1873.6 |
| gdb 4549 | 1899.6 <sup>a</sup> | 1902.3 | 1905.5 | 1901.7 | 1908.5 | 1908.1 | 1901.9 | 1906.2 | 1906.2 | 1904.1 | 1904.0 | 1904.0 |
| gdb 4550 | 1908.1 <sup>a</sup> | 1913.7 | 1919.5 | 1913.2 | 1916.0 | 1915.9 | 1910.8 | 1912.2 | 1912.2 | 1913.4 | 1913.4 | 1913.4 |
| gdb 4551 | 1916.7 <sup>a</sup> | 1920.8 | 1922.0 | 1925.0 | 1919.2 | 1922.0 | 1922.8 | 1927.7 | 1927.7 | 1929.6 | 1929.6 | 1929.6 |
| gdb 4552 | 1911.6 <sup>a</sup> | 1909.2 | 1913.8 | 1912.2 | 1915.4 | 1911.3 | 1903.8 | 1907.7 | 1907.7 | 1904.9 | 1904.9 | 1904.9 |
| gdb 4553 | 1895.9 <sup>a</sup> | 1899.7 | 1905.2 | 1901.2 | 1905.1 | 1904.1 | 1895.8 | 1901.4 | 1901.4 | 1899.1 | 1899.1 | 1899.1 |
| gdb 4554 | 1898.7 <sup>a</sup> | 1901.6 | 1904.3 | 1901.1 | 1908.1 | 1906.6 | 1899.8 | 1904.9 | 1904.9 | 1902.5 | 1902.5 | 1902.5 |
| gdb 4555 | 1903.0 <sup>a</sup> | 1910.6 | 1915.3 | 1909.8 | 1913.7 | 1911.9 | 1905.6 | 1908.2 | 1908.2 | 1909.3 | 1909.3 | 1909.3 |
| gdb 4556 | 1869.5 <sup>a</sup> | 1873.5 | 1879.9 | 1872.3 | 1875.5 | 1869.4 | 1863.7 | 1870.6 | 1870.6 | 1861.9 | 1861.9 | 1861.9 |
| gdb 4557 | 1867.6 <sup>a</sup> | 1872.7 | 1875.4 | 1869.9 | 1872.8 | 1867.8 | 1864.2 | 1869.6 | 1869.6 | 1861.2 | 1861.2 | 1861.2 |
| gdb 4558 | 1864.2 <sup>a</sup> | 1868.9 | 1873.3 | 1867.6 | 1869.8 | 1865.4 | 1858.9 | 1864.7 | 1864.7 | 1858.4 | 1858.4 | 1858.4 |
| gdb 4559 | 1871.1 <sup>a</sup> | 1874.4 | 1878.6 | 1871.5 | 1876.1 | 1870.8 | 1866.9 | 1873.1 | 1873.1 | 1864.6 | 1864.6 | 1864.6 |
| gdb 4560 | 1871.3 <sup>a</sup> | 1878.5 | 1886.2 | 1878.6 | 1879.9 | 1874.8 | 1869.3 | 1872.5 | 1872.5 | 1869.9 | 1869.9 | 1869.9 |
| gdb 4561 | 1872.2 <sup>a</sup> | 1879.4 | 1890.4 | 1880.4 | 1880.8 | 1875.3 | 1867.6 | 1871.9 | 1871.9 | 1869.0 | 1869.0 | 1869.0 |
| gdb 4562 | 1900.2 <sup>a</sup> | 1906.5 | 1909.9 | 1906.9 | 1903.5 | 1903.4 | 1898.4 | 1902.0 | 1902.0 | 1900.0 | 1900.0 | 1900.0 |
| gdb 4563 | 1903.0 <sup>a</sup> | 1916.8 | 1908.3 | 1905.9 | 1904.2 | 1904.4 | 1900.9 | 1904.3 | 1904.3 | 1902.7 | 1902.7 | 1902.7 |
| gdb 4564 | 1909.4 <sup>a</sup> | 1916.7 | 1920.6 | 1915.6 | 1911.3 | 1911.4 | 1909.0 | 1910.1 | 1910.1 | 1911.7 | 1911.7 | 1911.7 |
| gdb 4565 | 1869.9 <sup>a</sup> | 1876.2 | 1881.9 | 1877.1 | 1876.5 | 1872.4 | 1867.0 | 1876.0 | 1876.0 | 1871.2 | 1871.2 | 1871.2 |
| gdb 4566 | 1873.1 <sup>a</sup> | 1876.2 | 1880.4 | 1878.5 | 1880.6 | 1876.5 | 1870.5 | 1880.7 | 1880.7 | 1876.0 | 1875.9 | 1875.9 |
| gdb 4567 | 1870.2 <sup>a</sup> | 1876.7 | 1879.8 | 1876.6 | 1876.2 | 1872.2 | 1867.9 | 1877.5 | 1877.5 | 1872.5 | 1872.5 | 1872.5 |
| gdb 4568 | 1872.4 <sup>a</sup> | 1876.1 | 1878.5 | 1877.0 | 1878.3 | 1874.6 | 1869.8 | 1878.3 | 1878.3 | 1874.2 | 1874.1 | 1874.1 |
| gdb 4569 | 1870.3 <sup>a</sup> | 1873.4 | 1874.8 | 1873.8 | 1876.9 | 1871.0 | 1864.0 | 1879.4 | 1879.4 | 1868.3 | 1868.3 | 1868.3 |
| gdb 4570 | 1878.1 <sup>a</sup> | 1887.9 | 1890.4 | 1885.7 | 1884.3 | 1881.6 | 1881.6 | 1887.1 | 1887.1 | 1884.5 | 1884.4 | 1884.4 |
| gdb 4571 | 1867.1 <sup>a</sup> | 1879.8 | 1882.7 | 1876.2 | 1879.3 | 1871.2 | 1866.4 | 1873.0 | 1873.0 | 1864.8 | 1864.7 | 1864.8 |
| gdb 4572 | 1871.5 <sup>a</sup> | 1883.4 | 1887.4 | 1879.8 | 1880.1 | 1875.6 | 1874.5 | 1875.6 | 1875.6 | 1873.1 | 1873.1 | 1873.1 |
| gdb 4573 | 1868.5 <sup>a</sup> | 1881.1 | 1888.5 | 1879.8 | 1879.0 | 1874.1 | 1869.3 | 1871.5 | 1871.5 | 1869.7 | 1869.7 | 1869.7 |
| gdb 4574 | 1896.3 <sup>a</sup> | 1904.7 | 1908.9 | 1906.4 | 1902.8 | 1902.9 | 1897.2 | 1901.7 | 1901.6 | 1899.7 | 1899.7 | 1899.7 |
| gdb 4575 | 1898.6 <sup>a</sup> | 1905.6 | 1907.9 | 1905.8 | 1905.0 | 1904.9 | 1901.1 | 1904.9 | 1904.9 | 1902.9 | 1902.8 | 1902.8 |
| gdb 4576 | 1911.5 <sup>a</sup> | 1917.0 | 1920.3 | 1914.3 | 1910.7 | 1911.8 | 1912.7 | 1911.8 | 1911.8 | 1912.9 | 1912.9 | 1912.9 |
| gdb 4577 | 1896.8 <sup>a</sup> | 1900.8 | 1905.6 | 1901.9 | 1906.4 | 1904.9 | 1896.7 | 1901.5 | 1901.5 | 1899.2 | 1899.1 | 1899.1 |
| gdb 4578 | 1899.4 <sup>a</sup> | 1901.5 | 1903.0 | 1899.4 | 1905.6 | 1904.4 | 1898.9 | 1903.3 | 1903.3 | 1901.1 | 1901.1 | 1901.1 |
| gdb 4579 | 1908.2 <sup>a</sup> | 1913.3 | 1918.8 | 1912.5 | 1914.8 | 1914.6 | 1909.6 | 1910.7 | 1910.7 | 1912.1 | 1912.1 | 1912.1 |
| gdb 4580 | 1878.4 <sup>a</sup> | 1893.4 | 1896.5 | 1883.1 | 1895.1 | 1888.9 | 1877.7 | 1878.1 | 1878.1 | 1875.5 | 1875.5 | 1875.5 |
| gdb 4581 | 1867.2 <sup>a</sup> | 1872.3 | 1880.7 | 1872.6 | 1873.9 | 1867.9 | 1860.9 | 1868.5 | 1868.5 | 1859.2 | 1859.2 | 1859.2 |
| gdb 4582 | 1864.3 <sup>a</sup> | 1868.2 | 1872.6 | 1867.2 | 1869.6 | 1865.4 | 1858.9 | 1864.9 | 1864.9 | 1858.6 | 1858.6 | 1858.6 |
| gdb 4583 | 1871.6 <sup>a</sup> | 1874.2 | 1884.2 | 1874.2 | 1877.9 | 1871.5 | 1863.5 | 1871.5 | 1871.5 | 1862.2 | 1862.1 | 1862.1 |
| gdb 4584 | 1869.9 <sup>a</sup> | 1878.5 | 1882.9 | 1875.4 | 1876.8 | 1871.8 | 1870.3 | 1871.5 | 1871.5 | 1868.2 | 1868.2 | 1868.2 |
| gdb 4585 | 1872.4 <sup>a</sup> | 1879.2 | 1889.5 | 1879.9 | 1881.0 | 1875.8 | 1868.3 | 1872.0 | 1872.0 | 1869.2 | 1869.2 | 1869.2 |
| gdb 4586 | 1873.7 <sup>a</sup> | 1879.8 | 1889.0 | 1879.1 | 1879.6 | 1874.8 | 1871.0 | 1873.7 | 1873.7 | 1870.3 | 1870.2 | 1870.2 |
| gdb 4587 | 1874.6 <sup>a</sup> | 1889.0 | 1885.0 | 1885.5 | 1877.5 | 1877.3 | 1878.1 | 1883.7 | 1883.7 | 1884.2 | 1884.2 | 1884.2 |
| gdb 4588 | 1878.0 <sup>a</sup> | 1891.0 | 1884.9 | 1885.1 | 1878.8 | 1880.1 | 1881.3 | 1886.7 | 1886.7 | 1887.3 | 1887.3 | 1887.3 |
| gdb 4589 | 1873.2 <sup>a</sup> | 1882.9 | 1883.1 | 1883.6 | 1873.2 | 1874.0 | 1874.4 | 1881.4 | 1881.4 | 1881.3 | 1881.3 | 1881.3 |

. . . continued on next page. . . .

Table S26: . . . continued from previous page. . . .

| Molecule | Ref.                | MNDO   | AMI    | PM3    | PM6    | PM7    | OM1    |        | OM2    |        | OM3    |        | D3T    | D3     | D3T    |
|----------|---------------------|--------|--------|--------|--------|--------|--------|--------|--------|--------|--------|--------|--------|--------|--------|
|          |                     |        |        |        |        |        | OM1    | OM2    | OM3    | OM3    | D2     | D3     |        |        |        |
| gdb 4590 | 1877.5 <sup>a</sup> | 1885.8 | 1882.5 | 1884.8 | 1874.7 | 1876.8 | 1878.6 | 1884.9 | 1884.9 | 1884.9 | 1885.0 | 1884.9 | 1885.0 | 1884.9 | 1885.0 |
| gdb 4591 | 1877.3 <sup>a</sup> | 1890.7 | 1887.5 | 1886.9 | 1882.9 | 1882.3 | 1879.5 | 1885.9 | 1885.9 | 1885.9 | 1887.4 | 1885.9 | 1887.4 | 1885.9 | 1887.1 |
| gdb 4592 | 1880.4 <sup>a</sup> | 1892.4 | 1888.4 | 1888.9 | 1883.7 | 1884.2 | 1881.8 | 1887.6 | 1887.6 | 1887.6 | 1888.9 | 1887.6 | 1888.9 | 1887.6 | 1888.9 |
| gdb 4593 | 1849.4 <sup>a</sup> | 1864.1 | 1855.4 | 1851.8 | 1850.9 | 1848.8 | 1849.1 | 1850.1 | 1850.1 | 1850.1 | 1845.7 | 1850.1 | 1845.7 | 1845.7 | 1845.8 |
| gdb 4594 | 1849.7 <sup>a</sup> | 1864.6 | 1854.4 | 1852.3 | 1851.9 | 1850.4 | 1849.6 | 1852.1 | 1852.1 | 1852.1 | 1847.1 | 1852.1 | 1847.1 | 1847.1 | 1847.1 |
| gdb 4595 | 1851.4 <sup>a</sup> | 1875.0 | 1866.8 | 1862.0 | 1863.0 | 1857.5 | 1859.2 | 1858.5 | 1858.5 | 1858.5 | 1858.6 | 1858.5 | 1858.6 | 1858.6 | 1858.6 |
| gdb 4596 | 1870.6 <sup>a</sup> | 1888.4 | 1888.5 | 1884.9 | 1875.1 | 1874.9 | 1877.4 | 1877.5 | 1877.5 | 1877.5 | 1879.8 | 1877.5 | 1879.8 | 1879.8 | 1879.8 |
| gdb 4597 | 1885.5 <sup>a</sup> | 1889.2 | 1889.4 | 1887.1 | 1885.7 | 1883.4 | 1881.8 | 1884.1 | 1884.1 | 1884.1 | 1881.3 | 1884.1 | 1881.3 | 1881.3 | 1881.3 |
| gdb 4598 | 1872.2 <sup>a</sup> | 1889.6 | 1888.9 | 1886.3 | 1879.0 | 1879.1 | 1879.9 | 1880.6 | 1880.6 | 1880.6 | 1882.8 | 1880.6 | 1882.8 | 1882.8 | 1882.8 |
| gdb 4599 | 1872.3 <sup>a</sup> | 1890.5 | 1889.1 | 1885.3 | 1875.0 | 1876.0 | 1878.5 | 1877.1 | 1877.0 | 1877.0 | 1879.4 | 1877.0 | 1879.4 | 1879.4 | 1879.4 |
| gdb 4600 | 1859.8 <sup>a</sup> | 1878.2 | 1874.2 | 1872.4 | 1863.8 | 1863.1 | 1866.4 | 1866.6 | 1866.6 | 1866.7 | 1865.3 | 1866.7 | 1865.3 | 1865.3 | 1865.3 |
| gdb 4601 | 1870.1 <sup>a</sup> | 1888.5 | 1887.6 | 1884.2 | 1873.3 | 1873.9 | 1877.5 | 1877.3 | 1877.3 | 1877.2 | 1878.9 | 1877.2 | 1878.9 | 1878.8 | 1878.8 |
| gdb 4602 | 1854.6 <sup>a</sup> | 1877.1 | 1867.8 | 1866.1 | 1865.5 | 1859.4 | 1853.3 | 1854.2 | 1854.2 | 1854.2 | 1856.2 | 1854.2 | 1856.2 | 1856.2 | 1856.2 |
| gdb 4603 | 1854.3 <sup>a</sup> | 1877.8 | 1864.5 | 1863.5 | 1862.7 | 1857.7 | 1853.7 | 1854.6 | 1854.6 | 1854.6 | 1856.7 | 1854.6 | 1856.7 | 1856.7 | 1856.7 |
| gdb 4604 | 1855.3 <sup>a</sup> | 1866.9 | 1853.0 | 1855.5 | 1855.3 | 1853.7 | 1847.2 | 1852.2 | 1852.2 | 1852.2 | 1848.2 | 1852.2 | 1848.2 | 1848.2 | 1848.2 |
| gdb 4605 | 1855.9 <sup>a</sup> | 1879.0 | 1866.3 | 1865.9 | 1864.9 | 1860.5 | 1854.2 | 1852.8 | 1852.8 | 1852.8 | 1857.0 | 1852.8 | 1857.0 | 1857.0 | 1857.0 |
| gdb 4606 | 1852.5 <sup>a</sup> | 1877.6 | 1861.6 | 1865.0 | 1866.1 | 1859.1 | 1849.8 | 1854.8 | 1854.8 | 1854.8 | 1851.9 | 1854.8 | 1851.9 | 1851.9 | 1851.9 |
| gdb 4607 | 1850.0 <sup>a</sup> | 1878.7 | 1864.9 | 1865.0 | 1863.9 | 1856.8 | 1847.4 | 1851.5 | 1851.5 | 1851.5 | 1848.7 | 1851.5 | 1848.7 | 1848.7 | 1848.7 |
| gdb 4608 | 1851.1 <sup>a</sup> | 1879.6 | 1862.4 | 1865.3 | 1863.5 | 1857.7 | 1848.5 | 1853.0 | 1853.0 | 1853.0 | 1850.6 | 1853.0 | 1850.6 | 1850.6 | 1850.6 |
| gdb 4609 | 1857.6 <sup>a</sup> | 1891.1 | 1877.2 | 1877.1 | 1874.5 | 1869.1 | 1864.7 | 1867.0 | 1867.0 | 1866.9 | 1865.8 | 1867.0 | 1865.8 | 1865.8 | 1865.8 |
| gdb 4610 | 1852.1 <sup>a</sup> | 1866.6 | 1854.6 | 1853.0 | 1850.8 | 1850.2 | 1846.8 | 1849.2 | 1849.2 | 1849.2 | 1845.4 | 1849.2 | 1845.4 | 1845.3 | 1845.3 |
| gdb 4611 | 1850.2 <sup>a</sup> | 1864.7 | 1852.5 | 1852.0 | 1850.1 | 1848.7 | 1845.7 | 1848.7 | 1848.7 | 1848.7 | 1844.4 | 1848.7 | 1844.4 | 1844.4 | 1844.4 |
| gdb 4612 | 1843.4 <sup>a</sup> | 1863.8 | 1852.2 | 1850.8 | 1852.4 | 1847.3 | 1840.6 | 1844.1 | 1844.1 | 1844.1 | 1842.6 | 1844.1 | 1842.6 | 1842.6 | 1842.6 |
| gdb 4613 | 1854.0 <sup>a</sup> | 1876.5 | 1868.5 | 1862.8 | 1863.2 | 1858.2 | 1854.5 | 1854.6 | 1854.6 | 1854.6 | 1855.8 | 1854.6 | 1855.8 | 1855.8 | 1855.8 |
| gdb 4614 | 1853.8 <sup>a</sup> | 1880.7 | 1870.6 | 1866.9 | 1865.6 | 1859.4 | 1856.4 | 1853.3 | 1853.3 | 1853.3 | 1856.0 | 1853.3 | 1856.0 | 1856.0 | 1856.0 |
| gdb 4615 | 1856.1 <sup>a</sup> | 1881.9 | 1869.4 | 1866.7 | 1864.0 | 1859.8 | 1857.2 | 1852.9 | 1852.9 | 1852.9 | 1856.2 | 1852.9 | 1856.2 | 1856.2 | 1856.2 |
| gdb 4616 | 1852.3 <sup>a</sup> | 1880.5 | 1864.1 | 1865.5 | 1866.3 | 1859.5 | 1852.4 | 1853.2 | 1853.2 | 1853.1 | 1851.2 | 1853.1 | 1851.2 | 1851.1 | 1851.1 |
| gdb 4617 | 1857.5 <sup>a</sup> | 1894.2 | 1883.5 | 1879.9 | 1877.6 | 1871.1 | 1864.4 | 1863.5 | 1863.4 | 1863.4 | 1864.3 | 1863.4 | 1864.2 | 1864.2 | 1864.2 |
| gdb 4618 | 1855.3 <sup>a</sup> | 1866.3 | 1853.7 | 1856.2 | 1856.4 | 1854.2 | 1847.6 | 1852.4 | 1852.4 | 1852.4 | 1848.5 | 1852.4 | 1848.5 | 1848.5 | 1848.5 |
| gdb 4619 | 1857.6 <sup>a</sup> | 1877.5 | 1867.1 | 1865.9 | 1867.5 | 1862.0 | 1855.2 | 1855.6 | 1855.6 | 1855.6 | 1858.4 | 1855.6 | 1858.4 | 1858.4 | 1858.4 |
| gdb 4620 | 1850.7 <sup>a</sup> | 1868.6 | 1857.2 | 1854.0 | 1852.3 | 1850.7 | 1848.4 | 1847.7 | 1847.7 | 1847.7 | 1844.5 | 1847.7 | 1844.5 | 1844.5 | 1844.5 |
| gdb 4621 | 1849.7 <sup>a</sup> | 1868.0 | 1856.1 | 1853.7 | 1851.5 | 1849.9 | 1849.4 | 1848.1 | 1848.1 | 1848.1 | 1844.7 | 1848.1 | 1844.7 | 1844.7 | 1844.7 |
| gdb 4622 | 1842.9 <sup>a</sup> | 1867.7 | 1857.6 | 1852.8 | 1853.8 | 1847.7 | 1844.3 | 1843.3 | 1843.3 | 1843.3 | 1842.5 | 1843.3 | 1842.5 | 1842.5 | 1842.5 |
| gdb 4623 | 1852.6 <sup>a</sup> | 1879.5 | 1871.7 | 1863.8 | 1864.1 | 1858.1 | 1856.7 | 1853.4 | 1853.4 | 1853.4 | 1855.3 | 1853.4 | 1855.3 | 1855.3 | 1855.3 |
| gdb 4624 | 1849.4 <sup>a</sup> | 1880.8 | 1864.9 | 1865.1 | 1863.9 | 1857.1 | 1850.9 | 1851.2 | 1851.2 | 1851.2 | 1849.1 | 1851.2 | 1849.1 | 1849.1 | 1849.1 |
| gdb 4625 | 1852.5 <sup>a</sup> | 1881.7 | 1866.9 | 1866.0 | 1866.3 | 1859.3 | 1851.9 | 1852.2 | 1852.2 | 1852.2 | 1850.4 | 1852.2 | 1850.4 | 1850.4 | 1850.4 |
| gdb 4626 | 1852.1 <sup>a</sup> | 1882.5 | 1864.6 | 1865.3 | 1862.9 | 1857.6 | 1852.3 | 1852.5 | 1852.5 | 1852.5 | 1850.2 | 1852.5 | 1850.2 | 1850.2 | 1850.2 |
| gdb 4627 | 1857.8 <sup>a</sup> | 1894.1 | 1883.2 | 1879.6 | 1876.8 | 1870.7 | 1864.7 | 1863.2 | 1863.2 | 1863.2 | 1863.9 | 1863.2 | 1863.9 | 1863.9 | 1863.9 |
| gdb 4628 | 1864.0 <sup>a</sup> | 1892.4 | 1887.3 | 1878.8 | 1877.4 | 1871.0 | 1866.4 | 1873.3 | 1873.3 | 1873.3 | 1865.2 | 1873.3 | 1865.2 | 1865.2 | 1865.2 |
| gdb 4629 | 1863.6 <sup>a</sup> | 1891.8 | 1885.0 | 1878.5 | 1877.4 | 1871.2 | 1867.2 | 1874.6 | 1874.6 | 1874.6 | 1866.2 | 1874.6 | 1866.2 | 1866.2 | 1866.2 |
| gdb 4630 | 1865.3 <sup>a</sup> | 1895.6 | 1890.0 | 1881.7 | 1879.0 | 1873.8 | 1873.6 | 1874.0 | 1874.0 | 1874.0 | 1872.0 | 1874.0 | 1872.0 | 1872.0 | 1872.0 |
| gdb 4631 | 1869.2 <sup>a</sup> | 1896.1 | 1892.5 | 1882.2 | 1879.0 | 1873.5 | 1871.8 | 1872.0 | 1872.0 | 1872.0 | 1870.6 | 1872.0 | 1870.6 | 1870.5 | 1870.5 |
| gdb 4632 | 1879.4 <sup>a</sup> | 1894.8 | 1882.4 | 1888.8 | 1882.3 | 1883.0 | 1880.8 | 1883.1 | 1883.1 | 1883.1 | 1885.7 | 1883.1 | 1885.7 | 1885.7 | 1885.7 |
| gdb 4633 | 1886.7 <sup>a</sup> | 1895.2 | 1892.5 | 1889.7 | 1887.9 | 1886.1 | 1882.2 | 1884.3 | 1884.3 | 1884.3 | 1883.2 | 1884.3 | 1883.2 | 1883.2 | 1883.2 |
| gdb 4634 | 1875.9 <sup>a</sup> | 1893.6 | 1890.4 | 1887.6 | 1882.9 | 1882.4 | 1881.0 | 1883.2 | 1883.1 | 1883.1 | 1885.4 | 1883.1 | 1885.4 | 1885.4 | 1885.4 |

. . . continued on next page . . .

Table S26: ... continued from previous page. ...

| Molecule | Ref.                | MNDO   | AMI    | PM3    | PM6    | PM7    | OM1    | OM2    |        | OM3    |        | D3T    |
|----------|---------------------|--------|--------|--------|--------|--------|--------|--------|--------|--------|--------|--------|
|          |                     |        |        |        |        |        |        | D2     | D3     | D2     | D3     |        |
| gdb 4635 | 1871.3 <sup>a</sup> | 1888.9 | 1888.8 | 1885.3 | 1874.4 | 1875.3 | 1878.2 | 1877.3 | 1876.9 | 1879.6 | 1879.3 | 1879.3 |
| gdb 4636 | 1875.2 <sup>a</sup> | 1890.5 | 1889.2 | 1885.9 | 1875.8 | 1878.0 | 1881.4 | 1880.9 | 1880.8 | 1882.9 | 1882.9 | 1882.9 |
| gdb 4637 | 1852.5 <sup>a</sup> | 1865.4 | 1855.2 | 1854.8 | 1854.2 | 1851.8 | 1848.5 | 1850.8 | 1850.8 | 1847.4 | 1847.3 | 1847.3 |
| gdb 4638 | 1853.8 <sup>a</sup> | 1876.3 | 1865.5 | 1863.4 | 1858.8 | 1856.3 | 1856.3 | 1855.5 | 1855.5 | 1857.5 | 1857.5 | 1857.5 |
| gdb 4639 | 1851.8 <sup>a</sup> | 1869.2 | 1858.2 | 1855.7 | 1855.0 | 1852.4 | 1851.6 | 1850.0 | 1850.0 | 1847.4 | 1847.3 | 1847.3 |
| gdb 4640 | 1851.8 <sup>a</sup> | 1879.7 | 1869.3 | 1864.1 | 1862.6 | 1857.4 | 1858.5 | 1852.8 | 1852.8 | 1856.1 | 1856.1 | 1856.1 |
| gdb 4641 | 1849.3 <sup>a</sup> | 1881.3 | 1866.9 | 1864.8 | 1865.7 | 1857.6 | 1851.9 | 1848.2 | 1848.2 | 1847.5 | 1847.4 | 1847.4 |
| gdb 4642 | 1847.1 <sup>a</sup> | 1881.6 | 1868.0 | 1864.6 | 1862.8 | 1855.6 | 1850.0 | 1846.4 | 1846.4 | 1845.5 | 1845.5 | 1845.5 |
| gdb 4643 | 1877.3 <sup>a</sup> | 1893.4 | 1890.0 | 1888.9 | 1885.4 | 1883.9 | 1881.9 | 1884.0 | 1884.0 | 1886.5 | 1886.5 | 1886.5 |
| gdb 4644 | 1888.8 <sup>a</sup> | 1894.3 | 1892.6 | 1889.1 | 1891.1 | 1887.9 | 1885.2 | 1887.7 | 1887.7 | 1886.6 | 1886.6 | 1886.6 |
| gdb 4645 | 1848.1 <sup>a</sup> | 1867.0 | 1858.9 | 1853.0 | 1851.4 | 1849.0 | 1851.2 | 1847.8 | 1847.8 | 1844.7 | 1844.7 | 1844.7 |
| gdb 4646 | 1839.8 <sup>a</sup> | 1864.7 | 1853.2 | 1849.1 | 1850.2 | 1845.4 | 1847.8 | 1843.1 | 1843.1 | 1842.5 | 1842.5 | 1842.5 |
| gdb 4647 | 1885.2 <sup>a</sup> | 1892.0 | 1895.4 | 1889.4 | 1885.9 | 1883.6 | 1881.6 | 1880.2 | 1879.9 | 1878.6 | 1878.6 | 1878.6 |
| gdb 4648 | 1859.8 <sup>a</sup> | 1879.6 | 1875.6 | 1872.6 | 1862.7 | 1863.4 | 1868.0 | 1866.3 | 1866.3 | 1866.0 | 1866.0 | 1866.0 |
| gdb 4649 | 1869.3 <sup>a</sup> | 1891.6 | 1891.7 | 1886.0 | 1874.8 | 1874.9 | 1879.2 | 1875.0 | 1875.0 | 1878.6 | 1878.6 | 1878.6 |
| gdb 4650 | 1875.5 <sup>a</sup> | 1890.0 | 1886.1 | 1886.2 | 1878.2 | 1878.5 | 1877.2 | 1883.6 | 1883.6 | 1884.7 | 1884.6 | 1884.6 |
| gdb 4651 | 1876.9 <sup>a</sup> | 1890.8 | 1884.4 | 1885.3 | 1879.4 | 1879.4 | 1881.5 | 1886.9 | 1886.9 | 1887.3 | 1887.3 | 1887.3 |
| gdb 4652 | 1885.5 <sup>a</sup> | 1889.5 | 1885.2 | 1886.5 | 1883.7 | 1881.1 | 1875.9 | 1882.1 | 1882.1 | 1879.9 | 1879.9 | 1879.9 |
| gdb 4653 | 1897.3 <sup>a</sup> | 1896.7 | 1887.6 | 1895.8 | 1893.2 | 1898.2 | 1903.7 | 1907.7 | 1907.7 | 1908.5 | 1908.4 | 1908.3 |
| gdb 4654 | 1879.5 <sup>a</sup> | 1871.7 | 1879.9 | 1881.4 | 1876.1 | 1877.0 | 1873.0 | 1884.8 | 1884.8 | 1883.5 | 1883.5 | 1883.5 |
| gdb 4655 | 1878.5 <sup>a</sup> | 1872.8 | 1876.5 | 1880.5 | 1878.3 | 1880.1 | 1878.1 | 1889.0 | 1889.0 | 1887.3 | 1887.3 | 1887.3 |
| gdb 4656 | 1887.2 <sup>a</sup> | 1872.5 | 1879.6 | 1881.9 | 1882.1 | 1880.9 | 1874.4 | 1886.8 | 1886.8 | 1881.4 | 1881.4 | 1881.4 |
| gdb 4657 | 1881.3 <sup>a</sup> | 1891.6 | 1889.7 | 1887.7 | 1882.4 | 1883.2 | 1879.4 | 1885.5 | 1885.5 | 1887.0 | 1887.0 | 1887.0 |
| gdb 4658 | 1878.3 <sup>a</sup> | 1889.8 | 1887.1 | 1887.3 | 1882.7 | 1883.2 | 1882.7 | 1886.5 | 1886.5 | 1887.3 | 1887.2 | 1887.2 |
| gdb 4659 | 1889.3 <sup>a</sup> | 1891.9 | 1890.1 | 1889.2 | 1888.6 | 1886.9 | 1881.5 | 1887.6 | 1887.6 | 1885.2 | 1885.2 | 1885.2 |
| gdb 4660 | 1876.4 <sup>a</sup> | 1879.2 | 1884.7 | 1882.3 | 1877.8 | 1878.4 | 1876.9 | 1882.2 | 1882.2 | 1882.1 | 1882.0 | 1882.0 |
| gdb 4661 | 1876.9 <sup>a</sup> | 1878.8 | 1882.8 | 1881.4 | 1877.2 | 1878.2 | 1878.7 | 1881.3 | 1881.2 | 1881.8 | 1881.7 | 1881.7 |
| gdb 4662 | 1887.6 <sup>a</sup> | 1879.9 | 1886.9 | 1884.8 | 1884.8 | 1882.8 | 1879.3 | 1883.8 | 1883.8 | 1880.7 | 1880.7 | 1880.7 |
| gdb 4663 | 1899.0 <sup>a</sup> | 1894.3 | 1888.6 | 1896.5 | 1895.8 | 1897.2 | 1901.7 | 1906.7 | 1906.7 | 1907.5 | 1907.4 | 1907.4 |
| gdb 4664 | 1855.8 <sup>a</sup> | 1842.8 | 1815.7 | 1835.0 | 1848.6 | 1838.8 | 1837.3 | 1847.2 | 1847.1 | 1845.4 | 1845.3 | 1845.3 |
| gdb 4665 | 1876.2 <sup>a</sup> | 1860.8 | 1834.7 | 1849.5 | 1861.4 | 1849.4 | 1848.9 | 1855.0 | 1855.0 | 1853.3 | 1853.3 | 1853.3 |
| gdb 4666 | 1863.3 <sup>a</sup> | 1860.3 | 1832.6 | 1848.8 | 1854.0 | 1844.6 | 1846.3 | 1851.5 | 1851.5 | 1853.8 | 1853.8 | 1853.8 |
| gdb 4667 | 1871.3 <sup>a</sup> | 1871.1 | 1851.1 | 1863.6 | 1872.0 | 1867.0 | 1860.3 | 1864.4 | 1864.3 | 1864.6 | 1864.6 | 1864.6 |
| gdb 4668 | 1869.4 <sup>a</sup> | 1872.5 | 1852.6 | 1865.0 | 1873.9 | 1867.7 | 1858.9 | 1863.5 | 1863.5 | 1863.2 | 1863.1 | 1863.2 |
| gdb 4669 | 1874.1 <sup>a</sup> | 1874.1 | 1852.8 | 1866.5 | 1871.1 | 1870.6 | 1867.5 | 1873.5 | 1873.5 | 1869.2 | 1869.0 | 1869.0 |
| gdb 4670 | 1889.3 <sup>a</sup> | 1888.2 | 1872.9 | 1880.1 | 1890.1 | 1882.6 | 1877.1 | 1880.2 | 1880.2 | 1877.8 | 1877.8 | 1877.8 |
| gdb 4671 | 1881.2 <sup>a</sup> | 1888.6 | 1873.5 | 1879.8 | 1884.0 | 1879.0 | 1876.2 | 1879.1 | 1879.1 | 1880.5 | 1880.5 | 1880.5 |
| gdb 4672 | 1897.7 <sup>a</sup> | 1905.9 | 1903.5 | 1904.7 | 1904.7 | 1903.8 | 1900.1 | 1906.7 | 1906.7 | 1905.0 | 1905.0 | 1905.0 |
| gdb 4673 | 1916.4 <sup>a</sup> | 1919.9 | 1917.4 | 1916.0 | 1917.3 | 1915.5 | 1911.8 | 1913.8 | 1913.8 | 1911.4 | 1911.4 | 1911.4 |
| gdb 4674 | 1907.2 <sup>a</sup> | 1920.3 | 1918.2 | 1915.7 | 1911.2 | 1911.8 | 1910.5 | 1912.3 | 1912.3 | 1913.9 | 1913.9 | 1913.9 |
| gdb 4675 | 1851.4 <sup>a</sup> | 1841.1 | 1817.0 | 1834.5 | 1850.1 | 1839.3 | 1837.1 | 1845.2 | 1845.1 | 1843.7 | 1843.7 | 1843.7 |
| gdb 4676 | 1873.6 <sup>a</sup> | 1856.7 | 1835.2 | 1847.7 | 1862.2 | 1849.5 | 1849.1 | 1854.3 | 1854.3 | 1853.0 | 1853.0 | 1853.0 |
| gdb 4677 | 1860.7 <sup>a</sup> | 1856.2 | 1846.7 | 1846.7 | 1853.8 | 1844.3 | 1846.0 | 1849.8 | 1849.8 | 1853.2 | 1853.2 | 1853.2 |
| gdb 4678 | 1869.3 <sup>a</sup> | 1869.3 | 1853.1 | 1863.6 | 1872.9 | 1866.6 | 1859.9 | 1862.0 | 1862.0 | 1862.2 | 1862.2 | 1862.2 |
| gdb 4679 | 1886.7 <sup>a</sup> | 1885.0 | 1873.0 | 1878.7 | 1889.3 | 1881.9 | 1877.4 | 1878.0 | 1878.0 | 1876.5 | 1876.5 | 1876.5 |

... continued on next page ...

Table S26: ... continued from previous page ...

| Molecule | Ref.                | MNDO   | AMI    | PM3    | PM6    | PM7    | OM1    | OM2    |        | OM3    |        | D3     | D3T    |
|----------|---------------------|--------|--------|--------|--------|--------|--------|--------|--------|--------|--------|--------|--------|
|          |                     |        |        |        |        |        |        | D2     | D3     | D2     | D3T    |        |        |
| gdb 4680 | 1875.0 <sup>a</sup> | 1886.1 | 1871.7 | 1878.5 | 1882.7 | 1877.7 | 1875.8 | 1875.9 | 1875.9 | 1878.1 | 1878.1 | 1878.1 | 1878.1 |
| gdb 4681 | 1902.3 <sup>a</sup> | 1911.8 | 1902.4 | 1912.8 | 1913.8 | 1911.9 | 1906.8 | 1911.0 | 1911.0 | 1913.9 | 1913.8 | 1913.8 | 1913.8 |
| gdb 4682 | 1899.1 <sup>a</sup> | 1897.1 | 1892.2 | 1898.0 | 1896.7 | 1898.4 | 1905.4 | 1907.2 | 1907.2 | 1909.2 | 1909.2 | 1909.2 | 1909.2 |
| gdb 4683 | 1872.1 <sup>a</sup> | 1869.5 | 1854.7 | 1866.1 | 1872.0 | 1870.5 | 1867.2 | 1871.1 | 1871.1 | 1867.5 | 1867.3 | 1867.4 | 1867.4 |
| gdb 4684 | 1866.6 <sup>a</sup> | 1867.0 | 1849.9 | 1861.7 | 1871.9 | 1866.3 | 1859.2 | 1862.0 | 1862.1 | 1862.5 | 1861.9 | 1862.0 | 1862.0 |
| gdb 4685 | 1885.8 <sup>a</sup> | 1883.7 | 1872.8 | 1878.8 | 1889.4 | 1881.9 | 1876.9 | 1878.8 | 1878.8 | 1876.5 | 1876.5 | 1876.5 | 1876.5 |
| gdb 4686 | 1873.4 <sup>a</sup> | 1883.4 | 1870.0 | 1877.6 | 1881.2 | 1876.5 | 1873.7 | 1874.2 | 1874.2 | 1876.4 | 1876.3 | 1876.3 | 1876.3 |
| gdb 4687 | 1914.3 <sup>a</sup> | 1912.5 | 1915.7 | 1912.5 | 1916.3 | 1914.3 | 1910.8 | 1913.0 | 1913.0 | 1910.4 | 1910.3 | 1910.3 | 1910.3 |
| gdb 4688 | 1904.4 <sup>a</sup> | 1910.7 | 1914.3 | 1912.1 | 1908.8 | 1909.3 | 1907.5 | 1909.1 | 1909.0 | 1910.4 | 1910.3 | 1910.3 | 1910.3 |
| gdb 4689 | 1902.3 <sup>a</sup> | 1912.8 | 1902.0 | 1911.7 | 1914.0 | 1911.8 | 1907.8 | 1911.9 | 1911.9 | 1914.0 | 1913.9 | 1913.9 | 1913.9 |
| gdb 4690 | 1898.4 <sup>a</sup> | 1900.2 | 1899.6 | 1900.5 | 1903.9 | 1904.1 | 1901.2 | 1907.3 | 1907.2 | 1905.2 | 1905.1 | 1905.1 | 1905.1 |
| gdb 4691 | 1914.1 <sup>a</sup> | 1913.4 | 1915.5 | 1912.7 | 1916.0 | 1914.0 | 1911.0 | 1913.1 | 1913.1 | 1910.3 | 1910.3 | 1910.3 | 1910.3 |
| gdb 4692 | 1900.8 <sup>a</sup> | 1912.7 | 1911.7 | 1910.9 | 1906.7 | 1907.5 | 1906.6 | 1907.1 | 1907.1 | 1908.9 | 1908.8 | 1908.8 | 1908.9 |
| gdb 4693 | 1873.3 <sup>a</sup> | 1879.1 | 1883.4 | 1883.7 | 1876.4 | 1876.0 | 1876.3 | 1879.0 | 1879.0 | 1879.5 | 1879.4 | 1879.4 | 1879.4 |
| gdb 4694 | 1875.8 <sup>a</sup> | 1879.6 | 1883.6 | 1883.6 | 1881.0 | 1880.1 | 1878.6 | 1882.9 | 1882.9 | 1883.6 | 1883.5 | 1883.6 | 1883.6 |
| gdb 4695 | 1888.3 <sup>a</sup> | 1880.8 | 1883.3 | 1883.3 | 1886.6 | 1884.6 | 1883.1 | 1888.7 | 1888.7 | 1885.2 | 1884.6 | 1885.2 | 1885.2 |
| gdb 4696 | 1887.3 <sup>a</sup> | 1880.1 | 1886.9 | 1884.8 | 1885.1 | 1882.5 | 1878.3 | 1883.2 | 1883.2 | 1880.5 | 1880.5 | 1880.5 | 1880.5 |
| gdb 4697 | 1877.4 <sup>a</sup> | 1894.2 | 1892.6 | 1889.7 | 1883.0 | 1883.3 | 1880.9 | 1882.2 | 1882.2 | 1885.2 | 1885.2 | 1885.2 | 1885.2 |
| gdb 4698 | 1889.4 <sup>a</sup> | 1894.2 | 1890.7 | 1888.8 | 1890.7 | 1887.8 | 1885.8 | 1888.1 | 1888.1 | 1886.5 | 1886.4 | 1886.4 | 1886.4 |
| gdb 4699 | 1890.3 <sup>a</sup> | 1894.5 | 1895.0 | 1891.1 | 1890.8 | 1888.4 | 1884.1 | 1886.2 | 1886.2 | 1885.1 | 1885.1 | 1885.1 | 1885.1 |
| gdb 4700 | 1863.4 <sup>a</sup> | 1870.0 | 1871.0 | 1869.3 | 1865.7 | 1866.0 | 1867.2 | 1869.2 | 1869.2 | 1867.5 | 1867.5 | 1867.5 | 1867.5 |
| gdb 4701 | 1888.4 <sup>a</sup> | 1884.2 | 1889.0 | 1885.1 | 1887.8 | 1884.8 | 1884.5 | 1884.8 | 1884.8 | 1882.5 | 1882.5 | 1882.5 | 1882.5 |
| gdb 4702 | 1886.1 <sup>a</sup> | 1882.7 | 1890.3 | 1885.9 | 1885.9 | 1882.6 | 1880.5 | 1881.2 | 1881.2 | 1879.4 | 1879.3 | 1879.3 | 1879.3 |
| gdb 4703 | 1873.2 <sup>a</sup> | 1882.6 | 1887.8 | 1884.4 | 1877.2 | 1877.3 | 1877.2 | 1877.1 | 1877.1 | 1879.4 | 1879.3 | 1879.3 | 1879.3 |
| gdb 4704 | 1874.5 <sup>a</sup> | 1878.0 | 1883.4 | 1881.8 | 1879.8 | 1877.2 | 1875.8 | 1879.7 | 1879.6 | 1880.4 | 1880.3 | 1880.3 | 1880.3 |
| gdb 4705 | 1864.3 <sup>a</sup> | 1867.4 | 1869.3 | 1870.3 | 1866.6 | 1866.9 | 1865.7 | 1872.6 | 1872.6 | 1869.0 | 1869.0 | 1869.0 | 1869.0 |
| gdb 4706 | 1872.7 <sup>a</sup> | 1879.1 | 1882.2 | 1881.9 | 1874.3 | 1875.1 | 1874.5 | 1877.9 | 1877.9 | 1878.7 | 1878.6 | 1878.6 | 1878.6 |
| gdb 4707 | 1885.1 <sup>a</sup> | 1879.6 | 1884.6 | 1883.4 | 1881.9 | 1880.4 | 1877.8 | 1882.2 | 1882.2 | 1878.9 | 1878.9 | 1878.9 | 1878.9 |
| gdb 4708 | 1871.9 <sup>a</sup> | 1871.7 | 1882.7 | 1880.1 | 1870.3 | 1871.1 | 1873.0 | 1875.5 | 1875.5 | 1876.1 | 1876.1 | 1876.1 | 1876.1 |
| gdb 4709 | 1872.3 <sup>a</sup> | 1872.9 | 1880.5 | 1879.0 | 1869.7 | 1871.7 | 1875.2 | 1878.0 | 1878.0 | 1877.7 | 1877.7 | 1877.7 | 1877.7 |
| gdb 4710 | 1861.9 <sup>a</sup> | 1861.6 | 1868.5 | 1867.6 | 1861.4 | 1861.5 | 1863.6 | 1868.6 | 1868.6 | 1864.9 | 1864.9 | 1864.9 | 1864.9 |
| gdb 4711 | 1853.1 <sup>a</sup> | 1849.3 | 1849.1 | 1849.8 | 1850.5 | 1848.6 | 1844.2 | 1849.2 | 1849.2 | 1844.0 | 1843.9 | 1844.0 | 1844.0 |
| gdb 4712 | 1842.4 <sup>a</sup> | 1838.6 | 1833.5 | 1837.3 | 1838.9 | 1836.6 | 1833.1 | 1841.3 | 1841.3 | 1831.6 | 1831.6 | 1831.6 | 1831.6 |
| gdb 4713 | 1845.2 <sup>a</sup> | 1851.2 | 1845.7 | 1847.0 | 1848.8 | 1844.2 | 1842.3 | 1845.6 | 1845.6 | 1842.9 | 1842.9 | 1842.9 | 1842.9 |
| gdb 4714 | 1856.6 <sup>a</sup> | 1861.7 | 1860.7 | 1859.7 | 1861.1 | 1856.9 | 1854.4 | 1855.2 | 1855.2 | 1856.4 | 1856.4 | 1856.4 | 1856.4 |
| gdb 4715 | 1852.5 <sup>a</sup> | 1855.0 | 1852.4 | 1851.3 | 1851.2 | 1849.4 | 1847.7 | 1848.6 | 1848.6 | 1844.3 | 1844.2 | 1844.2 | 1844.3 |
| gdb 4716 | 1842.4 <sup>a</sup> | 1853.6 | 1848.4 | 1847.7 | 1850.5 | 1847.9 | 1843.3 | 1843.4 | 1843.4 | 1841.2 | 1841.2 | 1841.2 | 1841.2 |
| gdb 4717 | 1841.0 <sup>a</sup> | 1843.1 | 1837.2 | 1838.9 | 1840.3 | 1837.9 | 1836.4 | 1840.9 | 1840.9 | 1832.1 | 1832.1 | 1832.1 | 1832.1 |
| gdb 4718 | 1853.2 <sup>a</sup> | 1864.8 | 1863.4 | 1859.6 | 1861.6 | 1854.2 | 1854.3 | 1851.4 | 1851.4 | 1853.2 | 1853.2 | 1853.2 | 1853.2 |
| gdb 4719 | 1839.4 <sup>a</sup> | 1855.3 | 1845.9 | 1847.8 | 1850.1 | 1843.1 | 1836.8 | 1838.7 | 1838.7 | 1831.9 | 1831.9 | 1831.9 | 1831.9 |
| gdb 4720 | 1838.4 <sup>a</sup> | 1855.5 | 1847.3 | 1848.1 | 1849.3 | 1841.7 | 1835.3 | 1837.2 | 1837.2 | 1830.7 | 1830.7 | 1830.7 | 1830.7 |
| gdb 4721 | 1849.9 <sup>a</sup> | 1866.4 | 1861.2 | 1859.6 | 1863.5 | 1854.2 | 1847.4 | 1846.1 | 1846.1 | 1843.9 | 1843.9 | 1843.9 | 1843.9 |
| gdb 4722 | 1846.4 <sup>a</sup> | 1866.1 | 1861.2 | 1859.1 | 1857.8 | 1851.0 | 1844.1 | 1842.5 | 1842.5 | 1840.6 | 1840.6 | 1840.6 | 1840.6 |
| gdb 4723 | 1882.7 <sup>a</sup> | 1891.5 | 1891.8 | 1888.7 | 1887.9 | 1888.1 | 1882.3 | 1888.5 | 1888.5 | 1889.7 | 1889.7 | 1889.7 | 1889.7 |
| gdb 4724 | 1866.7 <sup>a</sup> | 1878.8 | 1872.9 | 1875.5 | 1870.6 | 1870.6 | 1869.2 | 1878.2 | 1878.2 | 1875.8 | 1872.4 | 1875.8 | 1875.8 |

... continued on next page ...

Table S26: ... continued from previous page. ...

| Molecule | Ref.                | MNDO   | AMI    | PM3    | PM6    | PM7    | OM1    | OM2    |        | OM3    |        | D3T    |
|----------|---------------------|--------|--------|--------|--------|--------|--------|--------|--------|--------|--------|--------|
|          |                     |        |        |        |        |        |        | D2     | D3     | D2     | D3     |        |
| gdb 4725 | 1853.2 <sup>a</sup> | 1864.4 | 1858.9 | 1853.6 | 1854.7 | 1853.0 | 1851.0 | 1852.1 | 1852.0 | 1847.8 | 1847.7 | 1847.7 |
| gdb 4726 | 1841.4 <sup>a</sup> | 1852.4 | 1842.2 | 1841.3 | 1842.7 | 1840.2 | 1838.2 | 1842.7 | 1842.7 | 1834.4 | 1834.4 | 1834.4 |
| gdb 4727 | 1879.4 <sup>a</sup> | 1871.0 | 1880.1 | 1881.5 | 1879.5 | 1880.4 | 1874.5 | 1886.0 | 1886.0 | 1884.4 | 1884.4 | 1884.4 |
| gdb 4728 | 1881.2 <sup>a</sup> | 1871.8 | 1876.7 | 1880.7 | 1877.3 | 1878.7 | 1877.3 | 1888.5 | 1888.5 | 1886.6 | 1886.5 | 1886.5 |
| gdb 4729 | 1867.2 <sup>a</sup> | 1858.9 | 1862.8 | 1869.3 | 1869.0 | 1869.0 | 1862.4 | 1877.4 | 1877.4 | 1872.6 | 1872.5 | 1872.5 |
| gdb 4730 | 1851.2 <sup>a</sup> | 1843.4 | 1846.8 | 1845.8 | 1847.1 | 1845.6 | 1842.9 | 1850.3 | 1850.2 | 1843.3 | 1843.3 | 1843.3 |
| gdb 4731 | 1850.5 <sup>a</sup> | 1845.3 | 1843.4 | 1845.3 | 1846.3 | 1846.0 | 1846.0 | 1853.5 | 1853.5 | 1845.9 | 1845.8 | 1845.8 |
| gdb 4732 | 1838.0 <sup>a</sup> | 1831.8 | 1830.0 | 1832.9 | 1837.3 | 1834.7 | 1831.1 | 1841.0 | 1841.0 | 1830.9 | 1830.9 | 1830.9 |
| gdb 4733 | 1855.7 <sup>a</sup> | 1858.6 | 1858.8 | 1856.6 | 1859.6 | 1856.0 | 1856.8 | 1860.3 | 1860.3 | 1858.3 | 1858.3 | 1858.3 |
| gdb 4734 | 1844.5 <sup>a</sup> | 1880.9 | 1883.2 | 1884.0 | 1873.2 | 1873.4 | 1874.0 | 1880.5 | 1880.5 | 1880.8 | 1880.8 | 1880.8 |
| gdb 4735 | 1873.3 <sup>a</sup> | 1880.0 | 1878.2 | 1882.3 | 1872.7 | 1873.7 | 1875.0 | 1884.3 | 1884.3 | 1882.0 | 1882.0 | 1882.0 |
| gdb 4736 | 1861.3 <sup>a</sup> | 1867.3 | 1866.1 | 1871.4 | 1864.3 | 1863.2 | 1861.2 | 1871.3 | 1871.3 | 1868.5 | 1868.5 | 1868.5 |
| gdb 4737 | 1874.6 <sup>a</sup> | 1867.3 | 1877.7 | 1880.2 | 1873.8 | 1873.9 | 1871.0 | 1881.6 | 1881.6 | 1879.8 | 1879.8 | 1879.8 |
| gdb 4738 | 1877.1 <sup>a</sup> | 1869.7 | 1875.3 | 1880.1 | 1875.0 | 1876.9 | 1875.7 | 1886.6 | 1886.7 | 1884.7 | 1884.6 | 1884.6 |
| gdb 4739 | 1864.3 <sup>a</sup> | 1857.2 | 1861.8 | 1868.3 | 1865.3 | 1865.9 | 1860.5 | 1874.2 | 1874.2 | 1869.6 | 1869.5 | 1869.5 |
| gdb 4740 | 1876.7 <sup>a</sup> | 1882.4 | 1885.3 | 1884.8 | 1875.9 | 1877.5 | 1875.9 | 1882.6 | 1882.6 | 1882.6 | 1882.6 | 1882.6 |
| gdb 4741 | 1878.3 <sup>a</sup> | 1883.9 | 1882.1 | 1884.1 | 1874.7 | 1876.8 | 1878.8 | 1884.9 | 1884.9 | 1884.6 | 1884.6 | 1884.6 |
| gdb 4742 | 1865.6 <sup>a</sup> | 1870.8 | 1869.1 | 1872.5 | 1866.3 | 1867.2 | 1863.7 | 1873.9 | 1873.9 | 1870.7 | 1870.7 | 1870.7 |
| gdb 4743 | 1873.8 <sup>a</sup> | 1867.6 | 1879.3 | 1879.5 | 1870.5 | 1870.2 | 1873.0 | 1876.6 | 1876.6 | 1876.1 | 1876.0 | 1876.0 |
| gdb 4744 | 1877.4 <sup>a</sup> | 1871.0 | 1879.3 | 1880.0 | 1871.0 | 1873.2 | 1876.0 | 1879.8 | 1879.8 | 1879.8 | 1879.8 | 1879.8 |
| gdb 4745 | 1862.5 <sup>a</sup> | 1856.7 | 1865.6 | 1868.1 | 1862.6 | 1862.6 | 1860.5 | 1868.3 | 1868.3 | 1865.0 | 1864.9 | 1864.9 |
| gdb 4746 | 1873.7 <sup>a</sup> | 1868.6 | 1880.9 | 1880.4 | 1872.5 | 1872.6 | 1871.3 | 1878.0 | 1878.0 | 1877.8 | 1877.8 | 1877.8 |
| gdb 4747 | 1883.5 <sup>a</sup> | 1866.7 | 1876.5 | 1879.0 | 1881.5 | 1879.3 | 1875.2 | 1883.7 | 1883.7 | 1878.8 | 1878.8 | 1878.8 |
| gdb 4748 | 1873.9 <sup>a</sup> | 1870.3 | 1878.2 | 1880.1 | 1874.0 | 1874.7 | 1875.4 | 1881.9 | 1881.9 | 1881.3 | 1881.3 | 1881.3 |
| gdb 4749 | 1861.1 <sup>a</sup> | 1856.4 | 1863.9 | 1867.8 | 1864.3 | 1863.2 | 1859.4 | 1868.6 | 1868.6 | 1865.3 | 1865.2 | 1865.2 |
| gdb 4750 | 1879.1 <sup>a</sup> | 1890.5 | 1888.6 | 1888.2 | 1883.4 | 1881.9 | 1879.4 | 1885.7 | 1885.7 | 1887.3 | 1887.3 | 1887.3 |
| gdb 4751 | 1877.3 <sup>a</sup> | 1889.6 | 1886.3 | 1887.5 | 1882.4 | 1881.2 | 1880.1 | 1886.9 | 1886.9 | 1887.9 | 1887.9 | 1887.9 |
| gdb 4752 | 1866.3 <sup>a</sup> | 1878.5 | 1872.3 | 1875.6 | 1871.9 | 1869.7 | 1868.1 | 1875.5 | 1875.4 | 1873.7 | 1873.6 | 1873.7 |
| gdb 4753 | 1850.2 <sup>a</sup> | 1863.6 | 1855.7 | 1851.7 | 1850.8 | 1849.9 | 1847.4 | 1848.4 | 1848.3 | 1844.4 | 1844.4 | 1844.4 |
| gdb 4754 | 1848.6 <sup>a</sup> | 1862.8 | 1853.7 | 1851.2 | 1850.6 | 1849.2 | 1848.3 | 1849.9 | 1849.9 | 1845.4 | 1845.4 | 1845.4 |
| gdb 4755 | 1837.2 <sup>a</sup> | 1851.6 | 1839.2 | 1838.9 | 1839.4 | 1837.0 | 1836.1 | 1837.9 | 1837.9 | 1830.6 | 1830.6 | 1830.6 |
| gdb 4756 | 1856.1 <sup>a</sup> | 1876.4 | 1871.0 | 1863.1 | 1865.6 | 1860.8 | 1860.8 | 1857.9 | 1857.9 | 1858.8 | 1858.8 | 1858.8 |
| gdb 4757 | 1873.7 <sup>a</sup> | 1889.5 | 1890.4 | 1886.4 | 1877.0 | 1877.5 | 1878.3 | 1878.5 | 1878.5 | 1881.2 | 1881.2 | 1881.2 |
| gdb 4758 | 1872.3 <sup>a</sup> | 1888.9 | 1888.5 | 1886.1 | 1877.3 | 1877.7 | 1879.3 | 1880.2 | 1880.2 | 1882.4 | 1882.4 | 1882.4 |
| gdb 4759 | 1861.1 <sup>a</sup> | 1877.7 | 1874.3 | 1873.9 | 1866.4 | 1865.6 | 1867.4 | 1868.5 | 1868.5 | 1867.8 | 1867.8 | 1867.8 |
| gdb 4760 | 1880.2 <sup>a</sup> | 1890.2 | 1889.7 | 1887.8 | 1883.3 | 1883.3 | 1880.8 | 1886.3 | 1886.3 | 1887.0 | 1887.0 | 1887.0 |
| gdb 4761 | 1881.9 <sup>a</sup> | 1890.9 | 1888.5 | 1888.5 | 1881.8 | 1882.1 | 1881.3 | 1886.3 | 1886.2 | 1887.2 | 1887.2 | 1887.2 |
| gdb 4762 | 1868.7 <sup>a</sup> | 1878.6 | 1873.9 | 1875.2 | 1870.5 | 1869.5 | 1867.5 | 1875.9 | 1875.9 | 1873.2 | 1873.2 | 1873.2 |
| gdb 4763 | 1877.5 <sup>a</sup> | 1879.2 | 1886.5 | 1883.9 | 1880.4 | 1880.9 | 1877.7 | 1881.9 | 1881.9 | 1882.3 | 1882.3 | 1882.3 |
| gdb 4764 | 1879.0 <sup>a</sup> | 1880.0 | 1885.4 | 1884.6 | 1879.0 | 1880.2 | 1878.2 | 1882.5 | 1882.5 | 1883.1 | 1883.0 | 1883.0 |
| gdb 4765 | 1865.7 <sup>a</sup> | 1867.6 | 1870.9 | 1871.4 | 1868.0 | 1867.6 | 1864.2 | 1871.5 | 1871.5 | 1868.6 | 1868.5 | 1868.5 |
| gdb 4766 | 1868.4 <sup>a</sup> | 1870.2 | 1880.5 | 1879.8 | 1868.7 | 1869.7 | 1870.9 | 1873.0 | 1873.0 | 1873.6 | 1873.6 | 1873.6 |
| gdb 4767 | 1870.4 <sup>a</sup> | 1872.7 | 1881.5 | 1880.0 | 1871.5 | 1872.7 | 1873.7 | 1875.7 | 1875.7 | 1876.4 | 1876.4 | 1876.4 |
| gdb 4768 | 1861.0 <sup>a</sup> | 1861.2 | 1868.3 | 1868.1 | 1861.7 | 1861.4 | 1862.3 | 1866.7 | 1866.7 | 1863.8 | 1863.8 | 1863.8 |
| gdb 4769 | 1851.6 <sup>a</sup> | 1849.1 | 1848.6 | 1848.1 | 1848.6 | 1847.5 | 1842.3 | 1847.9 | 1847.9 | 1842.1 | 1842.1 | 1842.1 |

... continued on next page ...

Table S26: . . . continued from previous page . . .

| Molecule | Ref.                | MNDO   | AMI    | PM3    | PM6    | PM7    | OM1    |        | OM2    |        | OM3    |        | OM3    | D3     | D3T    |
|----------|---------------------|--------|--------|--------|--------|--------|--------|--------|--------|--------|--------|--------|--------|--------|--------|
|          |                     |        |        |        |        |        | OM1    | OM2    | D2     | D3     | D3T    | D2     |        |        |        |
| gdb 4770 | 1852.3 <sup>a</sup> | 1850.4 | 1847.1 | 1848.7 | 1848.5 | 1848.1 | 1843.9 | 1849.5 | 1849.4 | 1849.5 | 1843.5 | 1843.5 | 1843.5 | 1843.5 | 1843.5 |
| gdb 4771 | 1842.1 <sup>a</sup> | 1838.4 | 1833.1 | 1836.0 | 1837.9 | 1836.6 | 1830.9 | 1838.7 | 1838.7 | 1838.7 | 1829.5 | 1829.4 | 1829.4 | 1829.4 | 1829.4 |
| gdb 4772 | 1858.5 <sup>a</sup> | 1862.3 | 1865.1 | 1860.8 | 1863.2 | 1858.6 | 1854.4 | 1856.1 | 1856.1 | 1856.1 | 1856.1 | 1856.0 | 1856.0 | 1856.0 | 1856.0 |
| gdb 4773 | 1850.7 <sup>a</sup> | 1853.3 | 1852.7 | 1850.3 | 1850.0 | 1848.8 | 1845.8 | 1847.0 | 1847.0 | 1847.0 | 1842.1 | 1842.1 | 1842.1 | 1842.1 | 1842.1 |
| gdb 4774 | 1850.4 <sup>a</sup> | 1853.7 | 1850.6 | 1850.2 | 1849.7 | 1848.5 | 1846.1 | 1847.9 | 1847.9 | 1847.9 | 1843.1 | 1843.1 | 1843.1 | 1843.1 | 1843.1 |
| gdb 4775 | 1841.7 <sup>a</sup> | 1842.3 | 1837.8 | 1838.5 | 1840.2 | 1837.9 | 1834.0 | 1838.2 | 1838.1 | 1838.1 | 1829.9 | 1829.8 | 1829.8 | 1829.8 | 1829.8 |
| gdb 4776 | 1857.2 <sup>a</sup> | 1867.0 | 1865.4 | 1858.5 | 1860.7 | 1855.7 | 1857.2 | 1854.1 | 1854.1 | 1854.1 | 1854.3 | 1854.3 | 1854.3 | 1854.3 | 1854.3 |
| gdb 4777 | 1871.7 <sup>a</sup> | 1885.8 | 1888.7 | 1884.8 | 1874.0 | 1873.7 | 1876.7 | 1875.6 | 1875.6 | 1875.6 | 1878.3 | 1878.3 | 1878.3 | 1878.3 | 1878.3 |
| gdb 4778 | 1871.9 <sup>a</sup> | 1886.9 | 1887.5 | 1885.2 | 1874.9 | 1875.1 | 1877.7 | 1876.7 | 1876.7 | 1876.7 | 1879.7 | 1879.7 | 1879.7 | 1879.7 | 1879.7 |
| gdb 4779 | 1863.1 <sup>a</sup> | 1875.5 | 1875.5 | 1874.0 | 1866.4 | 1865.1 | 1866.5 | 1868.6 | 1868.6 | 1868.6 | 1867.5 | 1867.5 | 1867.5 | 1867.5 | 1867.5 |
| gdb 4780 | 1873.3 <sup>a</sup> | 1876.3 | 1881.9 | 1880.3 | 1873.9 | 1873.2 | 1875.3 | 1878.3 | 1878.3 | 1878.3 | 1878.5 | 1878.5 | 1878.5 | 1878.5 | 1878.5 |
| gdb 4781 | 1885.4 <sup>a</sup> | 1876.5 | 1878.9 | 1880.8 | 1881.1 | 1879.7 | 1877.9 | 1881.7 | 1881.7 | 1881.7 | 1878.8 | 1878.7 | 1878.7 | 1878.7 | 1878.7 |
| gdb 4782 | 1876.9 <sup>a</sup> | 1878.4 | 1883.7 | 1882.1 | 1877.5 | 1877.6 | 1879.2 | 1881.8 | 1881.8 | 1881.8 | 1882.3 | 1882.2 | 1882.2 | 1882.2 | 1882.2 |
| gdb 4783 | 1863.8 <sup>a</sup> | 1866.2 | 1870.2 | 1870.9 | 1868.5 | 1866.3 | 1864.2 | 1870.9 | 1870.9 | 1870.9 | 1868.3 | 1868.2 | 1868.2 | 1868.2 | 1868.2 |
| gdb 4784 | 1870.5 <sup>a</sup> | 1872.2 | 1882.2 | 1879.7 | 1870.7 | 1871.0 | 1873.1 | 1874.5 | 1874.5 | 1874.5 | 1875.5 | 1875.5 | 1875.5 | 1875.5 | 1875.5 |
| gdb 4785 | 1869.7 <sup>a</sup> | 1872.2 | 1881.1 | 1879.6 | 1870.7 | 1871.3 | 1874.5 | 1876.6 | 1876.6 | 1876.6 | 1877.0 | 1877.0 | 1877.0 | 1877.0 | 1877.0 |
| gdb 4786 | 1861.5 <sup>a</sup> | 1862.1 | 1868.6 | 1867.8 | 1860.2 | 1860.4 | 1861.6 | 1866.5 | 1866.5 | 1866.5 | 1863.4 | 1863.4 | 1863.4 | 1863.4 | 1863.4 |
| gdb 4787 | 1877.9 <sup>a</sup> | 1878.8 | 1886.7 | 1884.3 | 1881.8 | 1881.4 | 1879.6 | 1882.3 | 1882.3 | 1882.3 | 1882.9 | 1882.9 | 1882.9 | 1882.9 | 1882.9 |
| gdb 4788 | 1867.5 <sup>a</sup> | 1866.8 | 1871.9 | 1872.7 | 1871.2 | 1870.0 | 1865.9 | 1872.9 | 1872.8 | 1872.9 | 1870.3 | 1870.3 | 1870.2 | 1870.2 | 1870.2 |
| gdb 4789 | 1839.7 <sup>a</sup> | 1840.9 | 1839.5 | 1837.0 | 1839.3 | 1836.3 | 1835.7 | 1837.8 | 1837.7 | 1837.7 | 1829.6 | 1829.6 | 1829.6 | 1829.6 | 1829.6 |
| gdb 4790 | 1849.2 <sup>a</sup> | 1851.1 | 1854.4 | 1848.7 | 1849.1 | 1847.3 | 1846.9 | 1846.4 | 1846.4 | 1846.4 | 1841.8 | 1841.7 | 1841.7 | 1841.7 | 1841.7 |
| gdb 4791 | 1875.3 <sup>a</sup> | 1889.0 | 1892.6 | 1886.5 | 1878.2 | 1879.4 | 1879.6 | 1879.2 | 1879.2 | 1879.2 | 1881.5 | 1881.4 | 1881.4 | 1881.4 | 1881.4 |
| gdb 4792 | 1864.3 <sup>a</sup> | 1877.8 | 1876.8 | 1874.9 | 1866.8 | 1866.9 | 1866.8 | 1868.9 | 1868.9 | 1868.9 | 1868.0 | 1867.9 | 1867.9 | 1867.9 | 1867.9 |
| gdb 4793 | 1877.3 <sup>a</sup> | 1878.2 | 1885.6 | 1884.2 | 1881.4 | 1880.1 | 1876.4 | 1881.2 | 1881.2 | 1881.2 | 1882.7 | 1882.6 | 1882.6 | 1882.6 | 1882.6 |
| gdb 4794 | 1888.6 <sup>a</sup> | 1879.8 | 1883.4 | 1883.7 | 1887.3 | 1885.5 | 1883.4 | 1888.3 | 1888.3 | 1888.3 | 1885.2 | 1885.2 | 1885.2 | 1885.2 | 1885.2 |
| gdb 4795 | 1862.1 <sup>a</sup> | 1866.5 | 1872.2 | 1871.6 | 1872.6 | 1868.7 | 1867.8 | 1875.2 | 1870.9 | 1871.0 | 1872.5 | 1868.7 | 1868.8 | 1872.4 | 1872.4 |
| gdb 4796 | 1873.5 <sup>a</sup> | 1868.8 | 1880.0 | 1877.9 | 1869.1 | 1871.3 | 1872.3 | 1877.6 | 1877.6 | 1877.6 | 1876.1 | 1876.0 | 1876.1 | 1876.1 | 1876.1 |
| gdb 4797 | 1858.9 <sup>a</sup> | 1857.8 | 1861.5 | 1859.0 | 1859.0 | 1856.8 | 1860.5 | 1869.3 | 1869.3 | 1869.3 | 1861.7 | 1861.6 | 1861.7 | 1861.7 | 1861.7 |
| gdb 4798 | 1869.8 <sup>a</sup> | 1886.5 | 1886.2 | 1883.0 | 1870.8 | 1871.4 | 1875.4 | 1874.3 | 1874.3 | 1874.3 | 1876.9 | 1876.9 | 1876.9 | 1876.9 | 1876.9 |
| gdb 4799 | 1860.8 <sup>a</sup> | 1875.1 | 1872.6 | 1871.8 | 1861.7 | 1861.5 | 1866.4 | 1868.8 | 1868.8 | 1868.8 | 1866.7 | 1866.7 | 1866.6 | 1866.6 | 1866.6 |
| gdb 4800 | 1871.8 <sup>a</sup> | 1875.9 | 1882.7 | 1880.8 | 1873.8 | 1874.7 | 1875.4 | 1878.5 | 1878.5 | 1878.5 | 1878.3 | 1878.2 | 1878.2 | 1878.2 | 1878.2 |
| gdb 4801 | 1863.0 <sup>a</sup> | 1866.4 | 1868.1 | 1868.9 | 1863.5 | 1861.7 | 1863.2 | 1869.6 | 1869.6 | 1869.6 | 1865.7 | 1865.7 | 1865.7 | 1865.7 | 1865.7 |
| gdb 4802 | 1835.0 <sup>a</sup> | 1840.0 | 1837.2 | 1835.1 | 1838.0 | 1834.4 | 1836.2 | 1835.7 | 1835.6 | 1835.7 | 1828.0 | 1827.9 | 1827.9 | 1827.9 | 1827.9 |
| gdb 4803 | 1849.7 <sup>a</sup> | 1851.7 | 1853.3 | 1848.6 | 1848.1 | 1845.9 | 1846.6 | 1846.3 | 1846.2 | 1846.2 | 1841.9 | 1841.9 | 1841.9 | 1841.9 | 1841.9 |
| gdb 4804 | 1844.0 <sup>a</sup> | 1853.2 | 1850.1 | 1846.2 | 1850.2 | 1846.1 | 1847.9 | 1845.8 | 1845.8 | 1845.8 | 1843.4 | 1843.4 | 1843.4 | 1843.4 | 1843.4 |
| gdb 4805 | 1874.4 <sup>a</sup> | 1888.4 | 1889.3 | 1884.5 | 1876.0 | 1876.3 | 1879.4 | 1878.2 | 1878.2 | 1878.2 | 1880.8 | 1880.8 | 1880.8 | 1880.8 | 1880.8 |
| gdb 4806 | 1886.3 <sup>a</sup> | 1888.1 | 1889.7 | 1887.5 | 1886.1 | 1884.2 | 1882.8 | 1884.1 | 1884.1 | 1884.1 | 1881.7 | 1881.7 | 1881.7 | 1881.7 | 1881.7 |
| gdb 4807 | 1864.1 <sup>a</sup> | 1877.8 | 1876.8 | 1875.0 | 1869.2 | 1868.4 | 1868.9 | 1871.5 | 1871.5 | 1871.5 | 1870.2 | 1870.2 | 1870.2 | 1870.2 | 1870.2 |
| gdb 4808 | 1885.2 <sup>a</sup> | 1876.0 | 1886.9 | 1883.0 | 1882.4 | 1880.5 | 1880.1 | 1879.5 | 1879.5 | 1879.5 | 1877.0 | 1876.9 | 1877.0 | 1877.0 | 1877.0 |
| gdb 4809 | 1860.9 <sup>a</sup> | 1865.3 | 1873.6 | 1870.6 | 1865.7 | 1864.8 | 1865.7 | 1866.2 | 1866.2 | 1866.2 | 1865.0 | 1865.0 | 1865.0 | 1865.0 | 1865.0 |
| gdb 4810 | 1871.3 <sup>a</sup> | 1874.2 | 1885.0 | 1879.7 | 1870.6 | 1870.7 | 1875.3 | 1873.2 | 1873.1 | 1873.1 | 1874.8 | 1874.8 | 1874.8 | 1874.8 | 1874.8 |
| gdb 4811 | 1859.7 <sup>a</sup> | 1864.7 | 1868.2 | 1867.1 | 1861.7 | 1859.8 | 1864.8 | 1864.6 | 1864.6 | 1864.6 | 1862.6 | 1862.6 | 1862.6 | 1862.6 | 1862.6 |
| gdb 4812 | 1861.1 <sup>a</sup> | 1865.7 | 1873.0 | 1869.9 | 1861.4 | 1861.6 | 1864.1 | 1865.0 | 1865.0 | 1865.0 | 1863.3 | 1863.2 | 1863.2 | 1863.2 | 1863.2 |
| gdb 4813 | 1869.8 <sup>a</sup> | 1876.5 | 1884.7 | 1879.2 | 1871.4 | 1870.2 | 1876.2 | 1872.7 | 1872.7 | 1872.7 | 1874.1 | 1874.1 | 1874.0 | 1874.0 | 1874.0 |
| gdb 4814 | 1882.9 <sup>a</sup> | 1876.3 | 1886.9 | 1882.7 | 1879.4 | 1877.5 | 1877.2 | 1876.8 | 1876.8 | 1876.8 | 1874.0 | 1873.8 | 1873.8 | 1873.8 | 1873.8 |

... continued on next page ...

Table S26: ... continued from previous page ...

| Molecule | Ref.                | MNDO   | AMI    | PM3    | PM6    | PM7    | OM1    | OM2    |        | OM3    |        | D3T    |
|----------|---------------------|--------|--------|--------|--------|--------|--------|--------|--------|--------|--------|--------|
|          |                     |        |        |        |        |        |        | D2     | D3     | D2     | D3     |        |
| gdb 4815 | 1861.3 <sup>a</sup> | 1865.5 | 1869.8 | 1868.3 | 1861.3 | 1861.9 | 1866.9 | 1868.6 | 1868.6 | 1866.0 | 1865.9 | 1865.9 |
| gdb 4816 | 1860.2 <sup>a</sup> | 1865.1 | 1872.1 | 1869.5 | 1862.1 | 1861.7 | 1864.8 | 1866.3 | 1866.3 | 1864.5 | 1864.5 | 1864.5 |
| gdb 4817 | 1871.0 <sup>a</sup> | 1876.5 | 1886.2 | 1881.7 | 1871.3 | 1871.7 | 1875.1 | 1873.5 | 1873.5 | 1875.8 | 1875.8 | 1875.8 |
| gdb 4818 | 1856.8 <sup>a</sup> | 1867.4 | 1863.5 | 1863.5 | 1865.1 | 1855.7 | 1852.0 | 1852.0 | 1852.0 | 1852.7 | 1852.7 | 1852.7 |
| gdb 4819 | 1853.9 <sup>a</sup> | 1866.3 | 1858.4 | 1864.0 | 1856.0 | 1852.3 | 1849.6 | 1848.7 | 1848.6 | 1850.8 | 1850.8 | 1850.8 |
| gdb 4820 | 1843.7 <sup>a</sup> | 1854.5 | 1848.1 | 1850.3 | 1850.4 | 1845.4 | 1836.0 | 1839.8 | 1839.8 | 1838.1 | 1838.1 | 1838.1 |
| gdb 4821 | 1856.4 <sup>a</sup> | 1865.4 | 1863.3 | 1864.4 | 1861.7 | 1855.9 | 1850.6 | 1851.5 | 1851.5 | 1852.8 | 1852.8 | 1852.8 |
| gdb 4822 | 1857.6 <sup>a</sup> | 1867.7 | 1863.3 | 1863.2 | 1862.3 | 1857.7 | 1851.2 | 1852.2 | 1852.2 | 1853.9 | 1853.9 | 1853.9 |
| gdb 4823 | 1858.5 <sup>a</sup> | 1868.0 | 1862.3 | 1863.3 | 1861.9 | 1857.9 | 1851.2 | 1850.9 | 1850.9 | 1853.1 | 1853.0 | 1853.0 |
| gdb 4824 | 1845.9 <sup>a</sup> | 1854.4 | 1849.1 | 1851.3 | 1852.5 | 1847.7 | 1835.9 | 1839.5 | 1839.5 | 1838.2 | 1838.2 | 1838.2 |
| gdb 4825 | 1845.2 <sup>a</sup> | 1841.4 | 1817.1 | 1833.5 | 1849.0 | 1835.1 | 1823.5 | 1830.2 | 1830.2 | 1829.4 | 1829.4 | 1829.4 |
| gdb 4826 | 1846.2 <sup>a</sup> | 1841.8 | 1813.4 | 1833.4 | 1848.0 | 1836.1 | 1824.9 | 1831.8 | 1831.8 | 1831.1 | 1831.1 | 1831.1 |
| gdb 4827 | 1836.2 <sup>a</sup> | 1830.0 | 1801.8 | 1822.3 | 1840.1 | 1826.6 | 1812.2 | 1822.7 | 1822.7 | 1818.5 | 1818.5 | 1818.5 |
| gdb 4828 | 1856.8 <sup>a</sup> | 1858.1 | 1833.7 | 1848.0 | 1859.8 | 1846.0 | 1842.8 | 1846.9 | 1846.9 | 1848.3 | 1848.3 | 1848.3 |
| gdb 4829 | 1828.8 <sup>a</sup> | 1823.5 | 1787.9 | 1809.0 | 1825.6 | 1806.7 | 1799.5 | 1805.3 | 1805.3 | 1805.3 | 1805.3 | 1805.3 |
| gdb 4830 | 1833.0 <sup>a</sup> | 1825.9 | 1785.7 | 1809.6 | 1827.0 | 1810.0 | 1804.6 | 1809.8 | 1809.8 | 1809.7 | 1809.7 | 1809.7 |
| gdb 4831 | 1822.8 <sup>a</sup> | 1813.9 | 1773.5 | 1798.2 | 1818.6 | 1800.0 | 1791.3 | 1799.8 | 1799.8 | 1796.5 | 1796.5 | 1796.5 |
| gdb 4832 | 1843.6 <sup>a</sup> | 1840.6 | 1801.8 | 1819.1 | 1836.2 | 1816.6 | 1819.2 | 1820.2 | 1820.2 | 1822.9 | 1822.9 | 1822.9 |
| gdb 4833 | 1832.1 <sup>a</sup> | 1829.6 | 1814.5 | 1822.8 | 1838.9 | 1830.1 | 1820.9 | 1825.3 | 1825.3 | 1821.4 | 1821.4 | 1821.4 |
| gdb 4834 | 1831.1 <sup>a</sup> | 1829.7 | 1810.0 | 1823.4 | 1839.1 | 1831.5 | 1821.6 | 1825.7 | 1825.6 | 1822.2 | 1822.2 | 1822.2 |
| gdb 4835 | 1820.8 <sup>a</sup> | 1818.0 | 1798.7 | 1811.7 | 1830.5 | 1821.6 | 1808.3 | 1815.3 | 1815.3 | 1808.7 | 1808.7 | 1808.7 |
| gdb 4836 | 1830.6 <sup>a</sup> | 1841.5 | 1827.2 | 1832.6 | 1848.5 | 1836.1 | 1826.4 | 1826.6 | 1826.6 | 1829.0 | 1828.9 | 1828.9 |
| gdb 4837 | 1881.1 <sup>a</sup> | 1880.1 | 1868.1 | 1878.4 | 1885.6 | 1876.5 | 1869.6 | 1874.9 | 1874.9 | 1877.7 | 1877.7 | 1877.7 |
| gdb 4838 | 1889.1 <sup>a</sup> | 1869.8 | 1852.6 | 1869.4 | 1880.7 | 1871.0 | 1860.6 | 1866.2 | 1866.2 | 1866.3 | 1866.2 | 1866.2 |
| gdb 4839 | 1880.5 <sup>a</sup> | 1880.6 | 1864.5 | 1877.7 | 1885.5 | 1877.5 | 1868.9 | 1874.7 | 1874.7 | 1878.4 | 1878.3 | 1878.3 |
| gdb 4840 | 1871.3 <sup>a</sup> | 1868.7 | 1852.8 | 1867.3 | 1877.0 | 1867.8 | 1857.2 | 1865.5 | 1865.5 | 1865.5 | 1865.5 | 1865.5 |
| gdb 4841 | 1864.8 <sup>a</sup> | 1847.5 | 1827.1 | 1845.5 | 1856.8 | 1843.2 | 1839.8 | 1848.6 | 1848.6 | 1852.3 | 1852.3 | 1852.3 |
| gdb 4842 | 1852.7 <sup>a</sup> | 1833.9 | 1811.1 | 1832.4 | 1847.2 | 1833.5 | 1830.4 | 1843.4 | 1843.4 | 1841.2 | 1841.2 | 1841.2 |
| gdb 4843 | 1869.5 <sup>a</sup> | 1851.8 | 1824.9 | 1846.7 | 1857.7 | 1846.8 | 1846.2 | 1852.9 | 1852.8 | 1856.6 | 1856.6 | 1856.6 |
| gdb 4844 | 1859.4 <sup>a</sup> | 1839.7 | 1813.5 | 1835.8 | 1849.9 | 1837.4 | 1833.1 | 1843.3 | 1843.3 | 1843.6 | 1843.6 | 1843.6 |
| gdb 4845 | 1856.8 <sup>a</sup> | 1845.3 | 1835.7 | 1845.9 | 1859.6 | 1851.3 | 1844.3 | 1857.8 | 1857.8 | 1853.5 | 1853.5 | 1853.5 |
| gdb 4846 | 1864.8 <sup>a</sup> | 1850.9 | 1838.4 | 1849.5 | 1864.0 | 1857.1 | 1852.7 | 1865.8 | 1865.8 | 1861.2 | 1861.1 | 1861.1 |
| gdb 4847 | 1848.5 <sup>a</sup> | 1837.1 | 1822.3 | 1836.0 | 1850.2 | 1842.7 | 1836.3 | 1851.3 | 1851.3 | 1845.1 | 1845.1 | 1845.1 |
| gdb 4848 | 1870.0 <sup>a</sup> | 1861.5 | 1854.2 | 1860.1 | 1868.3 | 1862.2 | 1858.5 | 1867.4 | 1867.4 | 1867.0 | 1866.9 | 1867.0 |
| gdb 4849 | 1881.3 <sup>a</sup> | 1879.1 | 1864.3 | 1874.9 | 1883.7 | 1873.1 | 1872.9 | 1878.0 | 1878.0 | 1879.2 | 1879.2 | 1879.2 |
| gdb 4850 | 1872.9 <sup>a</sup> | 1863.3 | 1847.3 | 1863.4 | 1868.5 | 1865.1 | 1861.8 | 1871.3 | 1871.3 | 1867.1 | 1867.1 | 1867.1 |
| gdb 4851 | 1882.9 <sup>a</sup> | 1881.4 | 1864.5 | 1877.0 | 1883.4 | 1876.8 | 1877.6 | 1883.3 | 1883.3 | 1884.4 | 1884.4 | 1884.4 |
| gdb 4852 | 1873.0 <sup>a</sup> | 1869.5 | 1852.4 | 1866.4 | 1874.4 | 1867.3 | 1863.8 | 1873.0 | 1873.0 | 1871.0 | 1871.0 | 1871.0 |
| gdb 4853 | 1885.1 <sup>a</sup> | 1891.8 | 1885.1 | 1885.8 | 1891.3 | 1883.9 | 1881.4 | 1881.1 | 1881.1 | 1882.6 | 1882.6 | 1882.6 |
| gdb 4854 | 1879.8 <sup>a</sup> | 1872.2 | 1869.5 | 1872.4 | 1877.0 | 1875.5 | 1869.7 | 1877.0 | 1877.0 | 1870.6 | 1870.6 | 1870.6 |
| gdb 4855 | 1881.5 <sup>a</sup> | 1873.1 | 1866.7 | 1872.4 | 1877.8 | 1877.3 | 1872.8 | 1880.2 | 1880.2 | 1873.9 | 1873.8 | 1873.9 |
| gdb 4856 | 1869.9 <sup>a</sup> | 1860.8 | 1854.5 | 1860.9 | 1869.2 | 1867.2 | 1859.3 | 1869.6 | 1869.6 | 1860.1 | 1860.1 | 1860.1 |
| gdb 4857 | 1888.4 <sup>a</sup> | 1888.9 | 1886.6 | 1885.2 | 1892.6 | 1887.8 | 1885.0 | 1889.4 | 1889.4 | 1888.5 | 1888.5 | 1888.5 |
| gdb 4858 | 1908.5 <sup>a</sup> | 1909.2 | 1910.6 | 1912.9 | 1912.8 | 1912.9 | 1909.0 | 1914.9 | 1914.9 | 1915.0 | 1915.0 | 1915.0 |
| gdb 4859 | 1909.2 <sup>a</sup> | 1909.6 | 1907.8 | 1912.3 | 1911.4 | 1912.3 | 1909.5 | 1916.4 | 1916.3 | 1916.5 | 1916.5 | 1916.5 |

... continued on next page ...

Table S26: . . . continued from previous page. . . .

| Molecule | Ref.                | MNDO   | AMI    | PM3    | PM6    | PM7    | OM1    | OM2    |        | OM3    |        | D3T    |
|----------|---------------------|--------|--------|--------|--------|--------|--------|--------|--------|--------|--------|--------|
|          |                     |        |        |        |        |        |        | D2     | D3     | D2     | D3     |        |
| gdb 4860 | 1898.0 <sup>a</sup> | 1897.2 | 1895.0 | 1900.8 | 1902.9 | 1902.3 | 1894.9 | 1906.6 | 1906.6 | 1903.3 | 1903.2 | 1903.2 |
| gdb 4861 | 1911.1 <sup>a</sup> | 1906.4 | 1911.6 | 1913.6 | 1913.5 | 1911.6 | 1905.7 | 1914.4 | 1914.4 | 1914.7 | 1914.7 | 1914.7 |
| gdb 4862 | 1925.5 <sup>a</sup> | 1904.7 | 1902.5 | 1911.4 | 1916.9 | 1914.4 | 1909.7 | 1920.4 | 1920.4 | 1917.0 | 1916.9 | 1916.9 |
| gdb 4863 | 1912.2 <sup>a</sup> | 1907.4 | 1908.7 | 1912.7 | 1914.5 | 1913.5 | 1908.8 | 1917.3 | 1917.3 | 1917.7 | 1917.7 | 1917.7 |
| gdb 4864 | 1902.0 <sup>a</sup> | 1895.0 | 1896.8 | 1902.0 | 1906.5 | 1903.6 | 1895.4 | 1907.6 | 1907.6 | 1904.7 | 1904.7 | 1904.7 |
| gdb 4865 | 1857.2 <sup>a</sup> | 1866.3 | 1859.0 | 1863.5 | 1865.4 | 1858.8 | 1849.3 | 1854.7 | 1854.7 | 1851.3 | 1851.3 | 1851.3 |
| gdb 4866 | 1862.4 <sup>a</sup> | 1879.7 | 1876.5 | 1876.0 | 1874.3 | 1868.7 | 1861.9 | 1864.5 | 1864.5 | 1864.1 | 1864.1 | 1864.1 |
| gdb 4867 | 1857.3 <sup>a</sup> | 1864.3 | 1861.0 | 1863.4 | 1863.7 | 1858.4 | 1848.8 | 1854.4 | 1854.4 | 1855.0 | 1854.9 | 1854.9 |
| gdb 4868 | 1857.6 <sup>a</sup> | 1861.9 | 1858.4 | 1860.3 | 1861.1 | 1855.8 | 1847.8 | 1853.4 | 1853.4 | 1854.0 | 1854.0 | 1854.0 |
| gdb 4869 | 1855.7 <sup>a</sup> | 1852.0 | 1846.2 | 1853.4 | 1853.4 | 1851.5 | 1841.7 | 1851.1 | 1851.1 | 1845.6 | 1845.6 | 1845.6 |
| gdb 4870 | 1856.7 <sup>a</sup> | 1864.5 | 1855.6 | 1860.2 | 1859.6 | 1855.8 | 1849.4 | 1853.1 | 1853.0 | 1854.8 | 1854.8 | 1854.8 |
| gdb 4871 | 1845.7 <sup>a</sup> | 1851.7 | 1843.2 | 1848.5 | 1850.4 | 1845.2 | 1835.0 | 1843.5 | 1843.5 | 1841.3 | 1841.3 | 1841.3 |
| gdb 4872 | 1858.9 <sup>a</sup> | 1878.4 | 1869.6 | 1865.6 | 1868.3 | 1861.0 | 1854.3 | 1854.0 | 1854.0 | 1857.5 | 1857.4 | 1857.4 |
| gdb 4873 | 1858.4 <sup>a</sup> | 1866.5 | 1855.1 | 1857.0 | 1857.6 | 1855.9 | 1848.4 | 1853.5 | 1853.5 | 1849.3 | 1849.3 | 1849.3 |
| gdb 4874 | 1853.0 <sup>a</sup> | 1855.2 | 1851.8 | 1853.6 | 1852.6 | 1850.5 | 1845.8 | 1848.5 | 1848.5 | 1844.4 | 1844.3 | 1844.3 |
| gdb 4875 | 1856.2 <sup>a</sup> | 1867.8 | 1862.8 | 1860.3 | 1861.9 | 1854.8 | 1855.2 | 1852.0 | 1852.0 | 1854.2 | 1854.2 | 1854.2 |
| gdb 4876 | 1913.5 <sup>a</sup> | 1906.7 | 1912.6 | 1913.1 | 1913.0 | 1912.9 | 1908.5 | 1916.7 | 1916.7 | 1916.3 | 1916.3 | 1916.3 |
| gdb 4877 | 1913.3 <sup>a</sup> | 1907.5 | 1909.5 | 1912.8 | 1912.6 | 1913.0 | 1910.4 | 1918.3 | 1918.3 | 1918.1 | 1918.0 | 1918.0 |
| gdb 4878 | 1899.2 <sup>a</sup> | 1895.6 | 1895.3 | 1900.6 | 1901.6 | 1900.7 | 1895.0 | 1905.8 | 1905.8 | 1902.5 | 1902.5 | 1902.5 |
| gdb 4879 | 1851.1 <sup>a</sup> | 1863.2 | 1857.9 | 1861.3 | 1860.8 | 1853.8 | 1844.1 | 1849.3 | 1849.3 | 1845.3 | 1845.3 | 1845.3 |
| gdb 4880 | 1857.5 <sup>a</sup> | 1866.3 | 1860.8 | 1863.0 | 1865.3 | 1858.7 | 1848.9 | 1853.9 | 1853.9 | 1850.5 | 1850.5 | 1850.5 |
| gdb 4881 | 1852.1 <sup>a</sup> | 1865.3 | 1855.2 | 1861.2 | 1860.2 | 1854.7 | 1846.5 | 1855.4 | 1855.4 | 1849.0 | 1849.0 | 1849.0 |
| gdb 4882 | 1842.9 <sup>a</sup> | 1853.3 | 1843.8 | 1850.3 | 1850.1 | 1852.2 | 1845.9 | 1843.1 | 1843.1 | 1835.6 | 1835.6 | 1835.6 |
| gdb 4883 | 1860.8 <sup>a</sup> | 1878.3 | 1873.8 | 1873.8 | 1871.4 | 1867.2 | 1864.3 | 1866.9 | 1866.9 | 1865.7 | 1865.6 | 1865.6 |
| gdb 4884 | 1846.8 <sup>a</sup> | 1833.2 | 1813.1 | 1831.2 | 1841.1 | 1831.1 | 1832.3 | 1839.5 | 1839.4 | 1837.8 | 1837.7 | 1837.7 |
| gdb 4885 | 1851.0 <sup>a</sup> | 1837.9 | 1814.9 | 1831.7 | 1838.5 | 1829.9 | 1832.1 | 1839.8 | 1839.8 | 1838.2 | 1838.2 | 1838.2 |
| gdb 4886 | 1855.4 <sup>a</sup> | 1847.0 | 1829.2 | 1843.3 | 1847.7 | 1838.0 | 1841.4 | 1845.1 | 1845.1 | 1847.8 | 1847.8 | 1847.8 |
| gdb 4887 | 1864.6 <sup>a</sup> | 1862.8 | 1848.4 | 1860.4 | 1863.6 | 1858.3 | 1852.6 | 1854.1 | 1854.1 | 1854.1 | 1854.1 | 1854.1 |
| gdb 4888 | 1859.2 <sup>a</sup> | 1867.6 | 1852.0 | 1862.6 | 1863.7 | 1859.3 | 1855.5 | 1857.2 | 1857.2 | 1856.3 | 1856.3 | 1856.3 |
| gdb 4889 | 1874.8 <sup>a</sup> | 1879.0 | 1869.4 | 1875.3 | 1876.4 | 1871.9 | 1870.5 | 1869.8 | 1869.8 | 1871.2 | 1871.2 | 1871.2 |
| gdb 4890 | 1852.9 <sup>a</sup> | 1854.5 | 1850.4 | 1852.3 | 1851.8 | 1850.6 | 1846.2 | 1848.8 | 1848.8 | 1844.2 | 1844.2 | 1844.2 |
| gdb 4891 | 1843.2 <sup>a</sup> | 1853.0 | 1849.7 | 1851.2 | 1852.7 | 1846.2 | 1837.9 | 1841.0 | 1841.0 | 1839.9 | 1839.9 | 1839.9 |
| gdb 4892 | 1853.7 <sup>a</sup> | 1863.0 | 1863.7 | 1862.5 | 1861.2 | 1853.5 | 1851.4 | 1850.4 | 1850.4 | 1851.8 | 1851.7 | 1851.7 |
| gdb 4893 | 1841.6 <sup>a</sup> | 1854.7 | 1847.4 | 1850.3 | 1851.2 | 1844.6 | 1833.4 | 1838.5 | 1838.5 | 1832.4 | 1832.4 | 1832.4 |
| gdb 4894 | 1854.2 <sup>a</sup> | 1864.9 | 1859.5 | 1861.5 | 1863.3 | 1856.6 | 1847.7 | 1849.8 | 1849.8 | 1846.7 | 1846.7 | 1846.7 |
| gdb 4895 | 1850.9 <sup>a</sup> | 1864.8 | 1859.8 | 1859.1 | 1860.5 | 1851.7 | 1845.7 | 1846.2 | 1846.2 | 1843.1 | 1843.1 | 1843.1 |
| gdb 4896 | 1853.9 <sup>a</sup> | 1865.2 | 1856.7 | 1854.6 | 1855.0 | 1853.6 | 1849.0 | 1851.8 | 1851.8 | 1847.6 | 1847.5 | 1847.5 |
| gdb 4897 | 1898.2 <sup>a</sup> | 1904.2 | 1899.0 | 1910.7 | 1906.2 | 1904.6 | 1901.4 | 1906.2 | 1906.2 | 1908.7 | 1908.7 | 1908.7 |
| gdb 4898 | 1856.7 <sup>a</sup> | 1867.3 | 1857.6 | 1862.5 | 1863.9 | 1858.0 | 1848.8 | 1854.2 | 1854.2 | 1850.7 | 1850.6 | 1850.6 |
| gdb 4899 | 1850.2 <sup>a</sup> | 1867.5 | 1862.7 | 1866.0 | 1867.5 | 1860.6 | 1849.1 | 1857.8 | 1857.8 | 1852.9 | 1852.9 | 1852.9 |
| gdb 4900 | 1858.0 <sup>a</sup> | 1877.9 | 1873.8 | 1873.5 | 1870.9 | 1865.2 | 1858.4 | 1861.0 | 1861.0 | 1860.1 | 1860.1 | 1860.1 |
| gdb 4901 | 1851.4 <sup>a</sup> | 1853.1 | 1848.8 | 1850.0 | 1848.9 | 1847.3 | 1844.4 | 1847.5 | 1847.5 | 1840.3 | 1842.5 | 1842.5 |
| gdb 4902 | 1845.8 <sup>a</sup> | 1853.8 | 1849.4 | 1849.4 | 1851.2 | 1846.1 | 1838.4 | 1841.3 | 1841.2 | 1839.7 | 1839.7 | 1839.7 |
| gdb 4903 | 1856.2 <sup>a</sup> | 1864.6 | 1867.4 | 1861.5 | 1863.6 | 1857.8 | 1852.1 | 1852.7 | 1852.7 | 1853.2 | 1853.1 | 1853.1 |
| gdb 4904 | 1855.6 <sup>a</sup> | 1852.0 | 1846.0 | 1852.5 | 1852.9 | 1851.4 | 1840.9 | 1850.5 | 1850.5 | 1844.7 | 1844.7 | 1844.7 |

. . . continued on next page . . .



Table S26: . . . continued from previous page. . . .

| Molecule | Ref.                | MNDO   | AMI    | PM3    | PM6    | PM7    | OM1    |        | OM2    |        | OM3    |        | D3T    | OM3    | D3     | D3T    |
|----------|---------------------|--------|--------|--------|--------|--------|--------|--------|--------|--------|--------|--------|--------|--------|--------|--------|
|          |                     |        |        |        |        |        | PM6    | PM7    | D2     | D3     | D2     | D3     |        |        |        |        |
| gdb 4905 | 1857.3 <sup>a</sup> | 1862.6 | 1858.3 | 1861.2 | 1862.5 | 1857.3 | 1848.0 | 1852.8 | 1852.7 | 1852.7 | 1854.1 | 1854.1 | 1854.1 | 1854.1 | 1854.1 | 1854.1 |
| gdb 4906 | 1848.2 <sup>a</sup> | 1852.3 | 1845.6 | 1850.3 | 1853.4 | 1848.4 | 1835.1 | 1842.9 | 1842.9 | 1842.9 | 1841.1 | 1841.1 | 1841.1 | 1841.1 | 1841.1 | 1841.1 |
| gdb 4907 | 1890.5 <sup>a</sup> | 1890.6 | 1883.6 | 1893.2 | 1886.6 | 1889.7 | 1894.8 | 1898.9 | 1898.9 | 1898.9 | 1899.9 | 1899.9 | 1899.9 | 1899.8 | 1899.8 | 1899.8 |
| gdb 4908 | 1853.1 <sup>a</sup> | 1850.0 | 1849.8 | 1849.2 | 1849.3 | 1848.0 | 1845.2 | 1849.9 | 1849.9 | 1849.9 | 1844.3 | 1844.3 | 1844.3 | 1844.3 | 1844.3 | 1844.3 |
| gdb 4909 | 1850.2 <sup>a</sup> | 1848.7 | 1843.9 | 1845.4 | 1845.4 | 1844.7 | 1845.4 | 1849.9 | 1849.9 | 1849.9 | 1843.2 | 1843.1 | 1843.1 | 1843.1 | 1843.1 | 1843.1 |
| gdb 4910 | 1843.7 <sup>a</sup> | 1849.1 | 1846.4 | 1847.8 | 1850.6 | 1845.8 | 1841.3 | 1846.9 | 1846.9 | 1846.9 | 1843.6 | 1843.5 | 1843.5 | 1843.5 | 1843.5 | 1843.5 |
| gdb 4911 | 1854.8 <sup>a</sup> | 1859.3 | 1861.1 | 1858.2 | 1861.1 | 1856.3 | 1854.9 | 1858.0 | 1858.0 | 1858.0 | 1855.6 | 1855.5 | 1855.5 | 1855.5 | 1855.5 | 1855.5 |
| gdb 4912 | 1858.5 <sup>a</sup> | 1877.9 | 1869.4 | 1866.2 | 1866.9 | 1862.1 | 1855.9 | 1856.3 | 1856.3 | 1856.3 | 1858.7 | 1858.6 | 1858.7 | 1858.7 | 1858.7 | 1858.7 |
| gdb 4913 | 1856.7 <sup>a</sup> | 1867.0 | 1853.5 | 1855.5 | 1855.4 | 1854.3 | 1846.7 | 1851.4 | 1851.4 | 1851.4 | 1847.6 | 1847.6 | 1847.6 | 1847.6 | 1847.6 | 1847.6 |
| gdb 4914 | 1846.9 <sup>a</sup> | 1865.8 | 1854.3 | 1855.1 | 1856.8 | 1851.7 | 1840.0 | 1843.1 | 1843.1 | 1843.1 | 1842.9 | 1842.9 | 1842.9 | 1842.9 | 1842.9 | 1842.9 |
| gdb 4915 | 1894.3 <sup>a</sup> | 1891.6 | 1888.6 | 1895.5 | 1889.0 | 1890.7 | 1897.8 | 1899.7 | 1899.7 | 1899.7 | 1901.4 | 1901.4 | 1901.4 | 1901.4 | 1901.4 | 1901.4 |
| gdb 4916 | 1867.2 <sup>a</sup> | 1862.5 | 1851.0 | 1863.3 | 1864.0 | 1863.2 | 1862.4 | 1866.4 | 1866.4 | 1866.4 | 1862.2 | 1862.2 | 1862.2 | 1862.2 | 1862.2 | 1862.2 |
| gdb 4917 | 1866.3 <sup>a</sup> | 1860.8 | 1846.2 | 1861.0 | 1865.6 | 1861.3 | 1856.1 | 1859.8 | 1859.8 | 1859.8 | 1859.3 | 1859.3 | 1859.3 | 1859.3 | 1859.3 | 1859.3 |
| gdb 4918 | 1863.5 <sup>a</sup> | 1865.3 | 1853.4 | 1863.6 | 1867.1 | 1862.4 | 1859.6 | 1865.2 | 1865.2 | 1865.2 | 1862.3 | 1862.3 | 1862.3 | 1862.3 | 1862.3 | 1862.3 |
| gdb 4919 | 1874.0 <sup>a</sup> | 1876.9 | 1868.7 | 1875.2 | 1876.5 | 1872.4 | 1871.0 | 1872.2 | 1872.2 | 1872.2 | 1872.2 | 1872.2 | 1872.2 | 1872.9 | 1872.9 | 1872.9 |
| gdb 4920 | 1891.2 <sup>a</sup> | 1890.6 | 1896.3 | 1898.0 | 1895.0 | 1895.6 | 1892.4 | 1899.2 | 1899.2 | 1899.2 | 1896.2 | 1896.2 | 1896.2 | 1896.2 | 1896.2 | 1896.2 |
| gdb 4921 | 1903.2 <sup>a</sup> | 1902.9 | 1912.3 | 1909.5 | 1904.3 | 1905.9 | 1905.5 | 1908.0 | 1908.0 | 1908.0 | 1908.3 | 1908.3 | 1908.3 | 1908.3 | 1908.3 | 1908.3 |
| gdb 4922 | 1852.3 <sup>a</sup> | 1847.9 | 1847.9 | 1847.2 | 1851.2 | 1844.3 | 1842.9 | 1842.1 | 1842.1 | 1842.1 | 1841.9 | 1841.8 | 1841.8 | 1841.8 | 1841.8 | 1841.8 |
| gdb 4923 | 1851.7 <sup>a</sup> | 1853.9 | 1853.5 | 1851.2 | 1850.0 | 1848.0 | 1846.9 | 1847.4 | 1847.4 | 1847.4 | 1843.1 | 1843.1 | 1843.1 | 1843.1 | 1843.1 | 1843.1 |
| gdb 4924 | 1855.8 <sup>a</sup> | 1878.5 | 1863.5 | 1865.6 | 1866.2 | 1860.4 | 1850.5 | 1854.3 | 1854.3 | 1854.3 | 1851.9 | 1851.9 | 1851.9 | 1851.9 | 1851.9 | 1851.9 |
| gdb 4925 | 1854.5 <sup>a</sup> | 1879.0 | 1866.5 | 1866.3 | 1865.7 | 1859.4 | 1848.5 | 1852.2 | 1852.1 | 1852.1 | 1849.6 | 1849.5 | 1849.6 | 1849.6 | 1849.6 | 1849.6 |
| gdb 4926 | 1843.4 <sup>a</sup> | 1867.8 | 1851.8 | 1855.1 | 1856.0 | 1849.5 | 1836.9 | 1845.4 | 1845.3 | 1845.3 | 1838.6 | 1838.6 | 1838.6 | 1838.6 | 1838.6 | 1838.6 |
| gdb 4927 | 1898.2 <sup>a</sup> | 1905.6 | 1897.0 | 1908.8 | 1902.6 | 1902.1 | 1901.9 | 1905.2 | 1905.2 | 1905.2 | 1907.2 | 1907.2 | 1907.2 | 1907.2 | 1907.2 | 1907.2 |
| gdb 4928 | 1853.6 <sup>a</sup> | 1866.4 | 1857.1 | 1860.8 | 1860.4 | 1854.8 | 1846.5 | 1851.6 | 1851.6 | 1851.6 | 1847.8 | 1847.8 | 1847.8 | 1847.8 | 1847.8 | 1847.8 |
| gdb 4929 | 1855.4 <sup>a</sup> | 1866.2 | 1859.3 | 1861.9 | 1862.7 | 1856.4 | 1846.6 | 1852.0 | 1852.0 | 1852.0 | 1848.1 | 1848.1 | 1848.1 | 1848.1 | 1848.1 | 1848.1 |
| gdb 4930 | 1854.5 <sup>a</sup> | 1866.2 | 1855.6 | 1860.3 | 1859.3 | 1854.8 | 1848.9 | 1854.0 | 1854.0 | 1854.0 | 1849.2 | 1849.2 | 1849.2 | 1849.2 | 1849.2 | 1849.2 |
| gdb 4931 | 1851.7 <sup>a</sup> | 1868.1 | 1862.3 | 1864.2 | 1864.3 | 1858.2 | 1850.5 | 1857.9 | 1857.9 | 1857.9 | 1852.1 | 1852.1 | 1852.1 | 1852.1 | 1852.1 | 1852.1 |
| gdb 4932 | 1843.6 <sup>a</sup> | 1855.0 | 1844.7 | 1850.2 | 1852.4 | 1846.2 | 1835.2 | 1845.2 | 1845.2 | 1845.2 | 1836.8 | 1836.7 | 1836.8 | 1836.8 | 1836.8 | 1836.8 |
| gdb 4933 | 1860.9 <sup>a</sup> | 1877.8 | 1874.7 | 1873.4 | 1871.8 | 1866.6 | 1861.9 | 1864.0 | 1864.0 | 1864.0 | 1862.2 | 1862.1 | 1862.1 | 1862.1 | 1862.1 | 1862.1 |
| gdb 4934 | 1896.1 <sup>a</sup> | 1894.6 | 1894.4 | 1897.9 | 1896.7 | 1897.8 | 1897.8 | 1904.5 | 1904.5 | 1904.5 | 1901.4 | 1901.3 | 1901.3 | 1901.3 | 1901.3 | 1901.3 |
| gdb 4935 | 1891.3 <sup>a</sup> | 1891.7 | 1894.4 | 1896.7 | 1892.9 | 1893.7 | 1892.2 | 1897.9 | 1897.9 | 1897.9 | 1894.7 | 1894.7 | 1894.7 | 1894.7 | 1894.7 | 1894.7 |
| gdb 4936 | 1900.6 <sup>a</sup> | 1903.8 | 1910.2 | 1908.5 | 1903.1 | 1904.0 | 1904.7 | 1906.5 | 1906.5 | 1906.5 | 1906.9 | 1906.9 | 1906.9 | 1906.9 | 1906.9 | 1906.9 |
| gdb 4937 | 1865.7 <sup>a</sup> | 1875.1 | 1877.0 | 1872.9 | 1872.7 | 1867.2 | 1862.4 | 1874.7 | 1874.7 | 1874.7 | 1864.0 | 1864.0 | 1864.0 | 1864.0 | 1864.0 | 1864.0 |
| gdb 4938 | 1867.0 <sup>a</sup> | 1875.7 | 1874.1 | 1872.4 | 1873.7 | 1869.1 | 1865.7 | 1877.8 | 1877.8 | 1877.8 | 1867.2 | 1867.2 | 1867.2 | 1867.2 | 1867.2 | 1867.2 |
| gdb 4939 | 1865.0 <sup>a</sup> | 1874.6 | 1875.1 | 1871.9 | 1873.6 | 1867.9 | 1864.8 | 1874.2 | 1874.2 | 1874.2 | 1864.6 | 1864.6 | 1864.6 | 1864.6 | 1864.6 | 1864.6 |
| gdb 4940 | 1857.0 <sup>a</sup> | 1867.0 | 1870.3 | 1866.8 | 1867.6 | 1862.1 | 1855.2 | 1866.1 | 1866.1 | 1866.1 | 1858.1 | 1858.1 | 1858.1 | 1858.1 | 1858.1 | 1858.1 |
| gdb 4941 | 1869.3 <sup>a</sup> | 1880.6 | 1882.5 | 1877.3 | 1875.9 | 1871.2 | 1871.0 | 1875.8 | 1875.8 | 1875.8 | 1871.8 | 1871.8 | 1871.8 | 1871.8 | 1871.8 | 1871.8 |
| gdb 4942 | 1868.9 <sup>a</sup> | 1878.3 | 1885.3 | 1878.2 | 1876.2 | 1871.2 | 1866.4 | 1872.9 | 1872.9 | 1872.9 | 1869.1 | 1869.0 | 1869.0 | 1869.0 | 1869.0 | 1869.0 |
| gdb 4943 | 1835.7 <sup>a</sup> | 1838.8 | 1818.6 | 1828.6 | 1842.2 | 1833.4 | 1825.0 | 1827.8 | 1827.8 | 1827.8 | 1824.6 | 1824.5 | 1824.5 | 1824.5 | 1824.5 | 1824.5 |
| gdb 4944 | 1832.9 <sup>a</sup> | 1838.5 | 1817.5 | 1829.6 | 1841.7 | 1833.6 | 1825.5 | 1825.1 | 1825.1 | 1825.1 | 1823.8 | 1823.8 | 1823.8 | 1823.8 | 1823.8 | 1823.8 |
| gdb 4945 | 1824.7 <sup>a</sup> | 1827.2 | 1802.1 | 1816.5 | 1829.3 | 1821.2 | 1811.7 | 1816.8 | 1816.8 | 1816.8 | 1811.2 | 1811.1 | 1811.1 | 1811.1 | 1811.1 | 1811.1 |
| gdb 4946 | 1826.3 <sup>a</sup> | 1840.2 | 1818.0 | 1829.5 | 1840.5 | 1828.9 | 1815.7 | 1817.5 | 1817.5 | 1817.5 | 1818.2 | 1818.2 | 1818.2 | 1818.2 | 1818.2 | 1818.2 |
| gdb 4947 | 1837.2 <sup>a</sup> | 1851.6 | 1833.5 | 1840.9 | 1852.4 | 1839.1 | 1832.0 | 1830.0 | 1830.0 | 1830.0 | 1833.5 | 1833.5 | 1833.5 | 1833.5 | 1833.5 | 1833.5 |
| gdb 4948 | 1882.2 <sup>a</sup> | 1888.8 | 1871.0 | 1880.8 | 1887.1 | 1878.6 | 1873.7 | 1876.2 | 1876.2 | 1876.2 | 1879.5 | 1879.4 | 1879.4 | 1879.4 | 1879.4 | 1879.4 |
| gdb 4949 | 1889.2 <sup>a</sup> | 1878.6 | 1855.5 | 1872.1 | 1881.4 | 1872.2 | 1864.0 | 1867.1 | 1867.1 | 1867.1 | 1867.5 | 1867.5 | 1867.5 | 1867.5 | 1867.5 | 1867.5 |

... continued on next page ...

Table S26: ... continued from previous page. ...

| Molecule | Ref.                | MNDO   | AMI    | PM3    | PM6    | PM7    | OM1    |        | OM2    |        | OM3    |        | D3T    |
|----------|---------------------|--------|--------|--------|--------|--------|--------|--------|--------|--------|--------|--------|--------|
|          |                     |        |        |        |        |        | D2     | D3     | D2     | D3     | D2     | D3     |        |
| gdb 4950 | 1881.1 <sup>a</sup> | 1887.5 | 1869.2 | 1881.2 | 1885.6 | 1877.6 | 1873.3 | 1874.2 | 1874.2 | 1874.2 | 1878.0 | 1878.0 | 1878.0 |
| gdb 4951 | 1870.8 <sup>a</sup> | 1876.1 | 1853.8 | 1868.2 | 1872.3 | 1864.9 | 1860.2 | 1864.9 | 1864.9 | 1864.9 | 1865.6 | 1865.6 | 1865.6 |
| gdb 4952 | 1831.0 <sup>a</sup> | 1833.3 | 1790.9 | 1811.4 | 1828.9 | 1810.2 | 1804.5 | 1807.5 | 1807.5 | 1807.5 | 1808.4 | 1808.4 | 1808.4 |
| gdb 4953 | 1833.1 <sup>a</sup> | 1833.9 | 1787.7 | 1812.8 | 1826.1 | 1808.7 | 1806.7 | 1808.5 | 1808.5 | 1808.5 | 1808.9 | 1808.9 | 1808.9 |
| gdb 4954 | 1824.5 <sup>a</sup> | 1823.1 | 1776.5 | 1800.8 | 1818.1 | 1798.8 | 1793.6 | 1800.9 | 1800.9 | 1800.9 | 1797.4 | 1797.4 | 1797.4 |
| gdb 4955 | 1835.7 <sup>a</sup> | 1835.1 | 1792.4 | 1814.1 | 1827.1 | 1808.5 | 1806.3 | 1810.6 | 1810.6 | 1810.6 | 1810.7 | 1810.7 | 1810.7 |
| gdb 4956 | 1843.3 <sup>a</sup> | 1846.7 | 1808.3 | 1825.7 | 1839.4 | 1818.7 | 1819.1 | 1818.6 | 1818.6 | 1818.6 | 1822.6 | 1822.6 | 1822.6 |
| gdb 4957 | 1844.1 <sup>a</sup> | 1849.7 | 1816.7 | 1833.9 | 1847.2 | 1833.7 | 1825.1 | 1828.3 | 1828.3 | 1828.3 | 1828.2 | 1828.2 | 1828.2 |
| gdb 4958 | 1851.7 <sup>a</sup> | 1853.0 | 1822.1 | 1839.5 | 1852.5 | 1839.4 | 1828.6 | 1832.5 | 1832.5 | 1832.5 | 1832.8 | 1832.8 | 1832.8 |
| gdb 4959 | 1845.0 <sup>a</sup> | 1854.2 | 1823.3 | 1840.5 | 1847.5 | 1835.4 | 1827.8 | 1831.9 | 1831.9 | 1831.9 | 1831.8 | 1831.8 | 1831.8 |
| gdb 4960 | 1834.4 <sup>a</sup> | 1837.7 | 1802.2 | 1823.9 | 1836.4 | 1822.9 | 1810.6 | 1817.0 | 1817.0 | 1817.0 | 1814.8 | 1814.8 | 1814.7 |
| gdb 4961 | 1859.2 <sup>a</sup> | 1865.8 | 1840.3 | 1853.4 | 1862.2 | 1849.3 | 1841.8 | 1843.8 | 1843.8 | 1843.8 | 1846.4 | 1846.4 | 1846.4 |
| gdb 4962 | 1850.1 <sup>a</sup> | 1855.4 | 1819.9 | 1839.3 | 1855.0 | 1840.3 | 1827.3 | 1833.8 | 1833.8 | 1833.8 | 1834.4 | 1834.4 | 1834.4 |
| gdb 4963 | 1838.4 <sup>a</sup> | 1842.4 | 1803.5 | 1827.4 | 1840.4 | 1826.2 | 1812.9 | 1823.3 | 1823.3 | 1823.3 | 1820.4 | 1820.4 | 1820.4 |
| gdb 4964 | 1845.6 <sup>a</sup> | 1856.7 | 1820.6 | 1839.8 | 1845.9 | 1832.7 | 1827.9 | 1833.3 | 1831.6 | 1831.6 | 1831.3 | 1831.3 | 1831.3 |
| gdb 4965 | 1859.4 <sup>a</sup> | 1871.1 | 1835.7 | 1851.4 | 1862.0 | 1846.4 | 1843.7 | 1844.4 | 1844.4 | 1844.4 | 1846.4 | 1846.4 | 1846.4 |
| gdb 4966 | 1843.8 <sup>a</sup> | 1852.7 | 1819.9 | 1836.9 | 1850.3 | 1836.3 | 1825.1 | 1829.2 | 1829.2 | 1829.2 | 1829.8 | 1829.8 | 1829.8 |
| gdb 4967 | 1845.4 <sup>a</sup> | 1852.8 | 1820.9 | 1839.4 | 1851.4 | 1838.3 | 1825.3 | 1830.8 | 1830.8 | 1830.8 | 1830.7 | 1830.6 | 1830.6 |
| gdb 4968 | 1843.7 <sup>a</sup> | 1853.2 | 1823.0 | 1840.5 | 1847.9 | 1835.1 | 1824.8 | 1830.3 | 1830.3 | 1830.3 | 1829.9 | 1829.9 | 1829.9 |
| gdb 4969 | 1832.8 <sup>a</sup> | 1838.6 | 1803.3 | 1824.7 | 1835.9 | 1822.0 | 1808.6 | 1817.5 | 1817.5 | 1817.5 | 1813.8 | 1813.8 | 1813.8 |
| gdb 4970 | 1856.4 <sup>a</sup> | 1867.6 | 1840.6 | 1853.0 | 1862.4 | 1850.1 | 1841.9 | 1843.8 | 1843.8 | 1843.8 | 1846.3 | 1846.3 | 1846.3 |
| gdb 4971 | 1846.2 <sup>a</sup> | 1857.3 | 1820.9 | 1839.2 | 1853.0 | 1838.1 | 1824.5 | 1829.6 | 1829.6 | 1829.6 | 1830.3 | 1830.3 | 1830.3 |
| gdb 4972 | 1848.9 <sup>a</sup> | 1857.0 | 1819.8 | 1839.0 | 1853.7 | 1839.2 | 1825.5 | 1831.4 | 1831.4 | 1831.4 | 1832.2 | 1832.2 | 1832.2 |
| gdb 4973 | 1845.4 <sup>a</sup> | 1856.6 | 1816.1 | 1837.8 | 1847.3 | 1833.7 | 1823.0 | 1827.0 | 1827.0 | 1827.0 | 1828.2 | 1828.2 | 1828.2 |
| gdb 4974 | 1842.9 <sup>a</sup> | 1857.2 | 1818.5 | 1838.8 | 1843.3 | 1830.2 | 1822.5 | 1827.1 | 1827.1 | 1827.1 | 1827.9 | 1827.9 | 1827.9 |
| gdb 4975 | 1837.4 <sup>a</sup> | 1844.0 | 1803.6 | 1826.8 | 1839.4 | 1825.5 | 1811.5 | 1820.9 | 1820.9 | 1820.9 | 1818.4 | 1818.3 | 1818.3 |
| gdb 4976 | 1834.3 <sup>a</sup> | 1843.7 | 1804.1 | 1826.7 | 1838.0 | 1823.7 | 1808.9 | 1818.3 | 1818.2 | 1818.2 | 1815.0 | 1815.0 | 1815.0 |
| gdb 4977 | 1854.7 <sup>a</sup> | 1870.0 | 1832.2 | 1848.5 | 1857.4 | 1840.8 | 1837.9 | 1837.6 | 1837.6 | 1837.6 | 1841.5 | 1841.5 | 1841.5 |
| gdb 4978 | 1847.6 <sup>a</sup> | 1869.9 | 1838.2 | 1856.0 | 1864.1 | 1851.6 | 1837.0 | 1845.0 | 1844.9 | 1844.9 | 1837.9 | 1837.9 | 1837.9 |
| gdb 4979 | 1856.5 <sup>a</sup> | 1881.3 | 1850.1 | 1864.3 | 1873.0 | 1860.3 | 1849.1 | 1851.3 | 1851.3 | 1851.3 | 1848.4 | 1848.4 | 1848.4 |
| gdb 4980 | 1857.5 <sup>a</sup> | 1866.9 | 1843.4 | 1855.0 | 1864.5 | 1854.6 | 1839.7 | 1845.6 | 1845.6 | 1845.6 | 1843.1 | 1843.1 | 1843.1 |
| gdb 4981 | 1856.2 <sup>a</sup> | 1867.5 | 1846.3 | 1856.4 | 1863.6 | 1853.2 | 1842.6 | 1849.0 | 1849.0 | 1849.0 | 1846.0 | 1846.0 | 1846.0 |
| gdb 4982 | 1858.0 <sup>a</sup> | 1868.8 | 1848.4 | 1857.7 | 1867.1 | 1856.2 | 1847.1 | 1854.5 | 1854.5 | 1854.5 | 1850.5 | 1850.5 | 1850.5 |
| gdb 4983 | 1856.0 <sup>a</sup> | 1865.9 | 1841.9 | 1853.7 | 1861.2 | 1851.0 | 1840.3 | 1845.0 | 1844.9 | 1844.9 | 1842.1 | 1842.1 | 1842.1 |
| gdb 4984 | 1867.8 <sup>a</sup> | 1881.1 | 1863.1 | 1868.9 | 1877.2 | 1866.3 | 1857.6 | 1860.9 | 1860.9 | 1860.9 | 1860.5 | 1860.5 | 1860.5 |
| gdb 4985 | 1869.0 <sup>a</sup> | 1882.2 | 1865.1 | 1870.1 | 1880.5 | 1869.3 | 1862.2 | 1866.5 | 1866.5 | 1866.5 | 1865.4 | 1865.4 | 1865.4 |
| gdb 4986 | 1868.2 <sup>a</sup> | 1879.2 | 1858.7 | 1866.2 | 1875.5 | 1864.7 | 1855.9 | 1856.5 | 1856.5 | 1856.5 | 1857.0 | 1857.0 | 1857.0 |
| gdb 4987 | 1872.4 <sup>a</sup> | 1883.4 | 1874.2 | 1876.9 | 1880.3 | 1875.0 | 1865.1 | 1867.8 | 1867.8 | 1867.8 | 1867.2 | 1867.2 | 1867.2 |
| gdb 4988 | 1884.9 <sup>a</sup> | 1895.8 | 1890.0 | 1888.6 | 1892.1 | 1885.4 | 1882.9 | 1882.0 | 1882.0 | 1882.0 | 1884.1 | 1884.1 | 1884.1 |
| gdb 4989 | 1881.6 <sup>a</sup> | 1887.5 | 1870.3 | 1880.9 | 1886.7 | 1877.5 | 1872.1 | 1875.3 | 1875.3 | 1875.3 | 1878.7 | 1878.7 | 1878.7 |
| gdb 4990 | 1881.7 <sup>a</sup> | 1887.4 | 1867.2 | 1879.3 | 1884.6 | 1876.3 | 1873.0 | 1874.6 | 1874.6 | 1874.6 | 1878.6 | 1878.6 | 1878.6 |
| gdb 4991 | 1892.1 <sup>a</sup> | 1877.7 | 1853.6 | 1871.0 | 1882.6 | 1873.3 | 1864.3 | 1868.2 | 1868.2 | 1868.2 | 1869.2 | 1869.2 | 1869.2 |
| gdb 4992 | 1871.3 <sup>a</sup> | 1875.7 | 1853.9 | 1868.6 | 1874.8 | 1866.1 | 1859.4 | 1864.6 | 1864.6 | 1864.6 | 1865.9 | 1865.8 | 1865.8 |
| gdb 4993 | 1872.7 <sup>a</sup> | 1867.1 | 1832.7 | 1852.3 | 1862.9 | 1849.5 | 1847.9 | 1854.2 | 1854.2 | 1854.2 | 1858.6 | 1858.5 | 1858.5 |
| gdb 4994 | 1863.5 <sup>a</sup> | 1849.5 | 1813.7 | 1839.1 | 1855.3 | 1841.3 | 1839.0 | 1852.1 | 1852.1 | 1852.1 | 1851.1 | 1851.1 | 1851.1 |

... continued on next page ...



Table S26: . . . continued from previous page. . . .

| Molecule | Ref.                | MNDO   | AMI    | PM3    | PM6    | PM7    | OM1    |        | OM2    |        | OM3    |        | OM3    |        | D3T    |
|----------|---------------------|--------|--------|--------|--------|--------|--------|--------|--------|--------|--------|--------|--------|--------|--------|
|          |                     |        |        |        |        |        | D2     | D3     | D2     | D3T    | D2     | D3     | D2     | D3     |        |
| gdb 5040 | 1881.1 <sup>a</sup> | 1877.4 | 1850.7 | 1870.1 | 1875.9 | 1872.1 | 1865.6 | 1874.4 | 1874.4 | 1874.4 | 1874.4 | 1872.1 | 1872.0 | 1872.0 | 1872.0 |
| gdb 5041 | 1893.7 <sup>a</sup> | 1881.7 | 1854.6 | 1873.6 | 1884.3 | 1875.1 | 1865.4 | 1870.8 | 1870.8 | 1870.8 | 1870.8 | 1871.8 | 1871.8 | 1871.8 | 1871.8 |
| gdb 5042 | 1884.5 <sup>a</sup> | 1890.4 | 1865.8 | 1880.7 | 1882.0 | 1874.6 | 1871.9 | 1875.7 | 1875.7 | 1875.7 | 1875.7 | 1880.0 | 1880.0 | 1880.0 | 1880.0 |
| gdb 5043 | 1878.6              | 1853.8 | 1869.9 | 1876.0 | 1876.2 | 1867.2 | 1859.1 | 1866.6 | 1866.6 | 1866.6 | 1866.6 | 1867.6 | 1867.6 | 1867.6 | 1867.6 |
| gdb 5044 | 1838.0 <sup>a</sup> | 1842.1 | 1818.6 | 1830.3 | 1844.0 | 1834.8 | 1824.7 | 1829.7 | 1829.7 | 1829.7 | 1829.7 | 1826.5 | 1826.5 | 1826.5 | 1826.5 |
| gdb 5045 | 1843.1 <sup>a</sup> | 1844.0 | 1817.8 | 1830.5 | 1845.3 | 1837.3 | 1827.7 | 1833.5 | 1833.5 | 1833.5 | 1833.5 | 1830.3 | 1830.3 | 1830.3 | 1830.3 |
| gdb 5046 | 1836.0 <sup>a</sup> | 1842.0 | 1814.4 | 1829.2 | 1838.6 | 1831.0 | 1823.3 | 1827.3 | 1827.3 | 1827.3 | 1827.3 | 1825.0 | 1825.0 | 1825.0 | 1825.0 |
| gdb 5047 | 1834.3 <sup>a</sup> | 1829.9 | 1798.7 | 1818.0 | 1828.3 | 1825.6 | 1815.0 | 1823.3 | 1823.3 | 1823.3 | 1823.3 | 1814.6 | 1814.6 | 1814.6 | 1814.6 |
| gdb 5048 | 1826.8 <sup>a</sup> | 1830.1 | 1802.2 | 1818.2 | 1831.1 | 1822.5 | 1810.8 | 1818.6 | 1818.6 | 1818.6 | 1818.6 | 1812.9 | 1812.9 | 1812.9 | 1812.9 |
| gdb 5049 | 1828.0 <sup>a</sup> | 1842.9 | 1814.7 | 1829.5 | 1838.9 | 1826.8 | 1817.2 | 1821.3 | 1821.3 | 1821.3 | 1821.3 | 1822.4 | 1822.4 | 1822.4 | 1822.4 |
| gdb 5050 | 1838.2 <sup>a</sup> | 1852.5 | 1830.4 | 1840.9 | 1852.1 | 1839.7 | 1830.6 | 1831.3 | 1831.3 | 1831.3 | 1831.3 | 1835.2 | 1835.2 | 1835.2 | 1835.2 |
| gdb 5051 | 1886.4 <sup>a</sup> | 1884.4 | 1872.9 | 1878.9 | 1883.8 | 1882.2 | 1874.3 | 1881.3 | 1881.3 | 1881.3 | 1881.3 | 1876.8 | 1876.8 | 1876.8 | 1876.8 |
| gdb 5052 | 1873.8 <sup>a</sup> | 1882.5 | 1869.5 | 1875.1 | 1880.1 | 1874.0 | 1865.3 | 1871.0 | 1871.0 | 1871.0 | 1871.0 | 1870.5 | 1870.5 | 1870.5 | 1870.5 |
| gdb 5053 | 1886.7 <sup>a</sup> | 1895.1 | 1883.8 | 1885.5 | 1889.2 | 1884.5 | 1880.5 | 1881.8 | 1881.8 | 1881.8 | 1881.8 | 1883.6 | 1883.6 | 1883.6 | 1883.6 |
| gdb 5054 | 1884.1 <sup>a</sup> | 1891.4 | 1871.1 | 1882.8 | 1889.8 | 1880.4 | 1873.5 | 1878.7 | 1878.7 | 1878.7 | 1878.7 | 1881.9 | 1881.9 | 1881.9 | 1881.9 |
| gdb 5055 | 1893.7 <sup>a</sup> | 1881.6 | 1854.7 | 1873.7 | 1884.8 | 1875.4 | 1865.1 | 1870.5 | 1870.5 | 1870.5 | 1870.5 | 1871.7 | 1871.7 | 1871.7 | 1871.7 |
| gdb 5056 | 1882.5 <sup>a</sup> | 1889.9 | 1866.0 | 1880.8 | 1884.7 | 1876.5 | 1872.2 | 1875.8 | 1875.8 | 1875.8 | 1875.8 | 1880.4 | 1880.4 | 1880.4 | 1880.4 |
| gdb 5057 | 1881.1 <sup>a</sup> | 1877.3 | 1850.8 | 1869.9 | 1876.3 | 1872.3 | 1865.7 | 1874.4 | 1874.4 | 1874.4 | 1874.4 | 1872.0 | 1872.0 | 1872.0 | 1872.0 |
| gdb 5058 | 1873.4 <sup>a</sup> | 1878.5 | 1853.8 | 1869.9 | 1875.0 | 1866.4 | 1859.1 | 1866.9 | 1866.9 | 1866.9 | 1866.9 | 1867.6 | 1867.6 | 1867.6 | 1867.6 |
| gdb 5059 | 1886.5 <sup>a</sup> | 1884.5 | 1872.9 | 1878.8 | 1883.8 | 1882.2 | 1874.4 | 1881.5 | 1881.5 | 1881.5 | 1881.5 | 1877.0 | 1877.0 | 1877.0 | 1877.0 |
| gdb 5060 | 1874.5 <sup>a</sup> | 1883.9 | 1870.3 | 1876.1 | 1880.4 | 1875.1 | 1866.1 | 1871.0 | 1871.0 | 1871.0 | 1871.0 | 1870.7 | 1870.7 | 1870.7 | 1870.7 |
| gdb 5061 | 1884.9 <sup>a</sup> | 1893.8 | 1887.3 | 1888.0 | 1894.0 | 1888.8 | 1880.5 | 1882.4 | 1882.4 | 1882.4 | 1882.4 | 1884.4 | 1884.4 | 1884.4 | 1884.4 |
| gdb 5062 | 1870.3 <sup>a</sup> | 1873.9 | 1851.6 | 1865.4 | 1870.2 | 1864.2 | 1858.0 | 1860.7 | 1860.7 | 1860.7 | 1860.7 | 1861.3 | 1861.3 | 1861.3 | 1861.3 |
| gdb 5063 | 1867.7 <sup>a</sup> | 1873.4 | 1850.8 | 1864.9 | 1867.1 | 1861.9 | 1856.3 | 1858.6 | 1858.6 | 1858.6 | 1858.6 | 1859.5 | 1859.5 | 1859.5 | 1859.5 |
| gdb 5064 | 1874.5 <sup>a</sup> | 1875.6 | 1852.2 | 1867.8 | 1867.4 | 1867.0 | 1865.5 | 1869.5 | 1869.5 | 1869.5 | 1869.5 | 1865.9 | 1865.9 | 1865.9 | 1865.9 |
| gdb 5065 | 1867.3 <sup>a</sup> | 1876.7 | 1855.6 | 1867.9 | 1868.5 | 1862.8 | 1860.2 | 1863.0 | 1863.0 | 1863.0 | 1863.0 | 1862.9 | 1862.9 | 1863.0 | 1863.0 |
| gdb 5066 | 1876.8 <sup>a</sup> | 1888.6 | 1871.8 | 1880.0 | 1880.4 | 1874.3 | 1873.7 | 1874.4 | 1874.4 | 1874.4 | 1874.4 | 1876.6 | 1876.6 | 1876.6 | 1876.6 |
| gdb 5067 | 1881.9 <sup>a</sup> | 1886.7 | 1868.9 | 1879.6 | 1885.1 | 1876.5 | 1873.3 | 1877.1 | 1877.1 | 1877.1 | 1877.1 | 1880.1 | 1880.1 | 1880.1 | 1880.1 |
| gdb 5068 | 1881.7 <sup>a</sup> | 1888.1 | 1866.8 | 1879.1 | 1883.6 | 1875.1 | 1875.6 | 1878.1 | 1878.1 | 1878.1 | 1878.1 | 1880.5 | 1880.5 | 1880.5 | 1880.5 |
| gdb 5069 | 1876.2 <sup>a</sup> | 1873.0 | 1850.0 | 1867.1 | 1871.3 | 1868.1 | 1864.7 | 1871.8 | 1871.8 | 1871.8 | 1871.8 | 1869.0 | 1869.0 | 1869.0 | 1869.0 |
| gdb 5070 | 1871.5 <sup>a</sup> | 1874.4 | 1852.5 | 1867.2 | 1872.8 | 1865.0 | 1860.5 | 1866.6 | 1866.6 | 1866.6 | 1866.6 | 1867.2 | 1867.2 | 1867.2 | 1867.2 |
| gdb 5071 | 1893.0 <sup>a</sup> | 1896.1 | 1886.0 | 1893.0 | 1899.4 | 1895.4 | 1889.9 | 1897.0 | 1897.0 | 1897.0 | 1897.0 | 1897.2 | 1897.2 | 1897.2 | 1897.2 |
| gdb 5072 | 1911.4 <sup>a</sup> | 1905.5 | 1898.2 | 1904.8 | 1910.5 | 1903.6 | 1901.4 | 1906.8 | 1906.8 | 1906.8 | 1906.8 | 1905.1 | 1905.1 | 1905.1 | 1905.1 |
| gdb 5073 | 1899.4 <sup>a</sup> | 1896.1 | 1885.6 | 1893.8 | 1895.3 | 1895.6 | 1893.6 | 1899.6 | 1899.6 | 1899.6 | 1899.6 | 1896.3 | 1896.3 | 1896.3 | 1896.3 |
| gdb 5074 | 1891.7 <sup>a</sup> | 1896.1 | 1887.9 | 1893.7 | 1899.1 | 1894.0 | 1888.8 | 1894.9 | 1894.9 | 1894.9 | 1894.9 | 1895.0 | 1895.0 | 1894.9 | 1894.9 |
| gdb 5075 | 1902.4 <sup>a</sup> | 1908.2 | 1903.8 | 1905.4 | 1909.6 | 1904.2 | 1902.7 | 1905.7 | 1905.7 | 1905.7 | 1905.7 | 1908.2 | 1908.2 | 1908.2 | 1908.2 |
| gdb 5076 | 1883.0 <sup>a</sup> | 1887.3 | 1875.4 | 1880.2 | 1885.8 | 1882.2 | 1874.9 | 1881.0 | 1881.0 | 1881.0 | 1881.0 | 1876.6 | 1876.6 | 1876.6 | 1876.6 |
| gdb 5077 | 1882.4 <sup>a</sup> | 1888.8 | 1870.3 | 1880.3 | 1885.8 | 1878.1 | 1875.5 | 1878.8 | 1878.8 | 1878.8 | 1878.8 | 1881.6 | 1881.6 | 1881.6 | 1881.6 |
| gdb 5078 | 1882.4 <sup>a</sup> | 1888.2 | 1866.8 | 1878.5 | 1881.2 | 1874.7 | 1875.6 | 1877.7 | 1877.7 | 1877.7 | 1877.7 | 1880.0 | 1880.0 | 1880.0 | 1880.0 |
| gdb 5079 | 1876.5 <sup>a</sup> | 1874.2 | 1850.3 | 1866.7 | 1871.1 | 1868.1 | 1865.8 | 1872.4 | 1872.4 | 1872.4 | 1872.4 | 1869.4 | 1869.4 | 1869.3 | 1869.3 |
| gdb 5080 | 1871.2 <sup>a</sup> | 1875.8 | 1853.1 | 1867.7 | 1871.5 | 1864.3 | 1861.2 | 1867.0 | 1867.0 | 1867.0 | 1867.0 | 1867.2 | 1867.2 | 1867.2 | 1867.2 |
| gdb 5081 | 1881.7 <sup>a</sup> | 1881.3 | 1871.8 | 1875.3 | 1879.3 | 1878.1 | 1872.8 | 1878.0 | 1878.0 | 1878.0 | 1878.0 | 1872.9 | 1872.9 | 1872.9 | 1872.9 |
| gdb 5082 | 1883.5 <sup>a</sup> | 1881.5 | 1871.6 | 1876.5 | 1881.4 | 1880.3 | 1873.9 | 1880.1 | 1880.1 | 1880.1 | 1880.1 | 1875.0 | 1875.0 | 1875.0 | 1875.0 |
| gdb 5083 | 1875.3 <sup>a</sup> | 1881.5 | 1872.9 | 1876.1 | 1882.2 | 1876.3 | 1868.2 | 1873.9 | 1873.9 | 1873.9 | 1873.9 | 1872.1 | 1872.1 | 1872.1 | 1872.1 |
| gdb 5084 | 1885.8 <sup>a</sup> | 1893.5 | 1886.5 | 1885.2 | 1894.0 | 1884.5 | 1881.6 | 1883.7 | 1883.7 | 1883.7 | 1883.7 | 1883.8 | 1883.8 | 1883.8 | 1883.8 |

. . . continued on next page . . .



Table S26: ... continued from previous page. ...

| Molecule | Ref.                | MNDO   | AMI    | PM3    | PM6    | PM7    | OM1    | OM2    |        | OM3    |        | D3T    | OM3    | D3     | D3T    |
|----------|---------------------|--------|--------|--------|--------|--------|--------|--------|--------|--------|--------|--------|--------|--------|--------|
|          |                     |        |        |        |        |        |        | D2     | D3     | D2     | D3     |        |        |        |        |
| gdb 5130 | 1883.5 <sup>a</sup> | 1881.2 | 1871.7 | 1876.4 | 1880.9 | 1880.3 | 1874.8 | 1880.8 | 1880.8 | 1880.8 | 1875.4 | 1880.8 | 1875.4 | 1875.4 | 1875.4 |
| gdb 5131 | 1873.1 <sup>a</sup> | 1879.7 | 1871.6 | 1874.9 | 1879.9 | 1874.4 | 1867.0 | 1872.5 | 1872.5 | 1872.5 | 1870.1 | 1872.5 | 1870.1 | 1870.1 | 1870.1 |
| gdb 5132 | 1885.8 <sup>a</sup> | 1891.6 | 1885.2 | 1882.7 | 1888.7 | 1883.9 | 1883.8 | 1883.9 | 1883.9 | 1883.9 | 1883.5 | 1883.9 | 1883.5 | 1883.5 | 1883.5 |
| gdb 5133 | 1887.3 <sup>a</sup> | 1891.8 | 1885.3 | 1881.7 | 1890.1 | 1884.9 | 1876.1 | 1876.0 | 1876.0 | 1876.0 | 1874.9 | 1876.0 | 1874.9 | 1874.9 | 1874.9 |
| gdb 5134 | 1887.3 <sup>a</sup> | 1892.0 | 1885.7 | 1882.3 | 1887.5 | 1886.0 | 1881.7 | 1881.6 | 1881.6 | 1881.6 | 1877.7 | 1881.6 | 1877.7 | 1877.7 | 1877.7 |
| gdb 5135 | 1902.2 <sup>a</sup> | 1897.6 | 1889.1 | 1897.1 | 1901.8 | 1901.2 | 1897.0 | 1903.5 | 1903.5 | 1903.5 | 1901.1 | 1903.5 | 1901.1 | 1901.1 | 1901.1 |
| gdb 5136 | 1911.6 <sup>a</sup> | 1905.6 | 1895.6 | 1904.8 | 1911.7 | 1906.1 | 1902.2 | 1907.7 | 1907.7 | 1907.7 | 1906.9 | 1907.7 | 1906.9 | 1906.8 | 1906.8 |
| gdb 5137 | 1909.3 <sup>a</sup> | 1905.3 | 1897.1 | 1905.7 | 1911.0 | 1904.5 | 1899.6 | 1905.2 | 1905.2 | 1905.2 | 1904.4 | 1905.2 | 1904.4 | 1904.4 | 1904.4 |
| gdb 5138 | 1890.3 <sup>a</sup> | 1896.4 | 1889.2 | 1895.3 | 1901.4 | 1896.2 | 1889.4 | 1896.0 | 1896.0 | 1896.0 | 1896.3 | 1896.0 | 1896.3 | 1896.3 | 1896.3 |
| gdb 5139 | 1901.3 <sup>a</sup> | 1908.4 | 1902.6 | 1904.4 | 1909.2 | 1903.9 | 1903.2 | 1905.7 | 1905.7 | 1905.7 | 1907.9 | 1905.7 | 1907.9 | 1907.9 | 1907.9 |
| gdb 5140 | 1884.1 <sup>a</sup> | 1887.4 | 1875.4 | 1879.8 | 1884.5 | 1882.7 | 1874.8 | 1880.8 | 1880.8 | 1880.8 | 1876.4 | 1880.8 | 1876.4 | 1876.4 | 1876.4 |
| gdb 5141 | 1875.1 <sup>a</sup> | 1864.7 | 1847.4 | 1856.5 | 1863.9 | 1863.6 | 1860.4 | 1865.5 | 1865.5 | 1865.5 | 1856.2 | 1865.5 | 1856.2 | 1856.2 | 1856.2 |
| gdb 5142 | 1861.8 <sup>a</sup> | 1862.7 | 1848.5 | 1854.8 | 1864.1 | 1859.2 | 1854.7 | 1859.3 | 1859.3 | 1859.3 | 1853.0 | 1859.3 | 1853.0 | 1853.0 | 1853.0 |
| gdb 5143 | 1851.4 <sup>a</sup> | 1859.7 | 1844.8 | 1853.3 | 1865.3 | 1855.8 | 1845.2 | 1851.9 | 1851.9 | 1851.9 | 1848.9 | 1851.9 | 1848.9 | 1848.9 | 1848.9 |
| gdb 5144 | 1873.1 <sup>a</sup> | 1874.6 | 1864.8 | 1866.6 | 1875.9 | 1870.3 | 1868.8 | 1870.6 | 1870.6 | 1870.6 | 1866.7 | 1870.6 | 1866.7 | 1866.7 | 1866.7 |
| gdb 5145 | 1862.3 <sup>a</sup> | 1871.5 | 1860.7 | 1865.0 | 1876.7 | 1866.5 | 1858.6 | 1862.3 | 1862.3 | 1862.3 | 1861.9 | 1862.3 | 1861.9 | 1861.9 | 1861.9 |
| gdb 5146 | 1878.6 <sup>a</sup> | 1878.0 | 1864.8 | 1867.7 | 1876.5 | 1871.7 | 1870.4 | 1872.1 | 1872.1 | 1872.1 | 1868.2 | 1872.1 | 1868.2 | 1868.2 | 1868.2 |
| gdb 5147 | 1849.4 <sup>a</sup> | 1847.5 | 1815.6 | 1833.2 | 1841.7 | 1838.5 | 1833.0 | 1837.8 | 1837.8 | 1837.8 | 1828.9 | 1837.8 | 1828.9 | 1828.9 | 1828.9 |
| gdb 5148 | 1840.3 <sup>a</sup> | 1848.8 | 1817.1 | 1832.7 | 1841.2 | 1833.7 | 1826.9 | 1830.8 | 1830.8 | 1830.8 | 1825.0 | 1830.8 | 1825.0 | 1825.0 | 1825.0 |
| gdb 5149 | 1833.4 <sup>a</sup> | 1843.3 | 1809.2 | 1827.6 | 1840.9 | 1829.7 | 1816.2 | 1819.8 | 1819.8 | 1819.8 | 1818.5 | 1819.8 | 1818.5 | 1818.5 | 1818.5 |
| gdb 5150 | 1852.8 <sup>a</sup> | 1861.5 | 1834.9 | 1845.6 | 1855.8 | 1847.6 | 1842.2 | 1843.7 | 1843.7 | 1843.7 | 1840.5 | 1843.7 | 1840.5 | 1840.5 | 1840.5 |
| gdb 5151 | 1843.7 <sup>a</sup> | 1855.2 | 1825.8 | 1839.9 | 1854.6 | 1842.8 | 1830.4 | 1830.3 | 1830.3 | 1830.3 | 1832.3 | 1830.3 | 1832.3 | 1832.3 | 1832.3 |
| gdb 5152 | 1848.4 <sup>a</sup> | 1857.7 | 1829.8 | 1843.1 | 1853.8 | 1846.0 | 1839.5 | 1841.6 | 1841.6 | 1841.6 | 1837.9 | 1841.6 | 1837.9 | 1837.9 | 1837.9 |
| gdb 5153 | 1863.4 <sup>a</sup> | 1869.0 | 1850.1 | 1862.9 | 1866.9 | 1861.4 | 1854.9 | 1855.8 | 1855.8 | 1855.8 | 1856.7 | 1855.8 | 1856.7 | 1856.7 | 1856.7 |
| gdb 5154 | 1871.5 <sup>a</sup> | 1871.8 | 1853.7 | 1866.7 | 1868.7 | 1867.5 | 1865.5 | 1868.3 | 1868.3 | 1868.3 | 1864.9 | 1868.3 | 1864.9 | 1864.9 | 1864.9 |
| gdb 5155 | 1863.4 <sup>a</sup> | 1872.3 | 1854.7 | 1865.7 | 1867.4 | 1862.2 | 1859.0 | 1860.4 | 1860.4 | 1860.4 | 1860.6 | 1860.4 | 1860.6 | 1860.5 | 1860.5 |
| gdb 5156 | 1873.7 <sup>a</sup> | 1884.8 | 1870.8 | 1877.9 | 1879.3 | 1873.3 | 1872.3 | 1871.2 | 1871.2 | 1871.2 | 1873.6 | 1871.2 | 1873.6 | 1873.6 | 1873.6 |
| gdb 5157 | 1884.1 <sup>a</sup> | 1886.1 | 1874.8 | 1879.2 | 1883.4 | 1882.1 | 1874.6 | 1880.7 | 1880.7 | 1880.7 | 1876.1 | 1880.7 | 1876.1 | 1876.1 | 1876.1 |
| gdb 5158 | 1888.3 <sup>a</sup> | 1893.8 | 1887.5 | 1884.3 | 1889.6 | 1887.3 | 1882.2 | 1881.0 | 1881.0 | 1881.0 | 1878.0 | 1881.0 | 1878.0 | 1878.0 | 1878.0 |
| gdb 5159 | 1912.1 <sup>a</sup> | 1905.6 | 1897.7 | 1904.1 | 1909.8 | 1903.5 | 1902.0 | 1907.4 | 1907.4 | 1907.4 | 1905.3 | 1907.4 | 1905.3 | 1905.3 | 1905.3 |
| gdb 5160 | 1890.9 <sup>a</sup> | 1896.1 | 1887.1 | 1893.2 | 1897.9 | 1893.8 | 1888.2 | 1894.9 | 1894.8 | 1894.8 | 1894.8 | 1894.8 | 1894.8 | 1894.8 | 1894.8 |
| gdb 5161 | 1900.0 <sup>a</sup> | 1896.4 | 1885.4 | 1893.2 | 1895.0 | 1895.9 | 1894.7 | 1900.1 | 1900.1 | 1900.1 | 1896.7 | 1900.1 | 1896.7 | 1896.6 | 1896.6 |
| gdb 5162 | 1890.1 <sup>a</sup> | 1896.6 | 1886.0 | 1891.8 | 1894.0 | 1890.6 | 1887.4 | 1892.0 | 1892.0 | 1892.0 | 1892.2 | 1892.0 | 1892.2 | 1892.2 | 1892.2 |
| gdb 5163 | 1903.5 <sup>a</sup> | 1909.7 | 1904.0 | 1905.2 | 1908.8 | 1904.6 | 1904.2 | 1906.3 | 1906.3 | 1906.3 | 1908.1 | 1906.3 | 1908.1 | 1908.1 | 1908.1 |
| gdb 5164 | 1864.0 <sup>a</sup> | 1877.9 | 1868.5 | 1869.3 | 1880.3 | 1872.5 | 1859.7 | 1863.2 | 1863.2 | 1863.2 | 1859.4 | 1863.2 | 1859.4 | 1859.3 | 1859.3 |
| gdb 5165 | 1874.3 <sup>a</sup> | 1889.9 | 1882.1 | 1878.6 | 1891.7 | 1880.3 | 1873.3 | 1872.8 | 1872.8 | 1872.8 | 1871.1 | 1872.8 | 1871.1 | 1871.1 | 1871.1 |
| gdb 5166 | 1888.0 <sup>a</sup> | 1892.6 | 1886.6 | 1882.6 | 1888.1 | 1886.6 | 1882.5 | 1882.4 | 1882.4 | 1882.4 | 1878.3 | 1882.4 | 1878.3 | 1878.3 | 1878.3 |
| gdb 5167 | 1834.0 <sup>a</sup> | 1838.3 | 1791.9 | 1813.9 | 1832.3 | 1812.8 | 1805.9 | 1810.8 | 1810.8 | 1810.8 | 1811.5 | 1810.8 | 1811.5 | 1811.4 | 1811.4 |
| gdb 5168 | 1838.9 <sup>a</sup> | 1838.3 | 1790.1 | 1814.1 | 1832.3 | 1813.8 | 1807.3 | 1813.4 | 1813.4 | 1813.4 | 1814.2 | 1813.4 | 1814.2 | 1814.2 | 1814.2 |
| gdb 5169 | 1837.0 <sup>a</sup> | 1840.0 | 1789.8 | 1815.1 | 1829.3 | 1810.2 | 1807.7 | 1812.8 | 1812.8 | 1812.8 | 1812.9 | 1812.8 | 1812.9 | 1812.9 | 1812.9 |
| gdb 5170 | 1828.1 <sup>a</sup> | 1828.2 | 1775.2 | 1803.0 | 1824.3 | 1805.8 | 1797.0 | 1808.8 | 1808.8 | 1808.8 | 1804.6 | 1808.8 | 1804.6 | 1804.6 | 1804.6 |
| gdb 5171 | 1827.1 <sup>a</sup> | 1827.7 | 1777.5 | 1803.5 | 1821.5 | 1801.3 | 1794.4 | 1803.7 | 1803.6 | 1803.6 | 1800.0 | 1803.6 | 1800.0 | 1800.0 | 1800.0 |
| gdb 5172 | 1836.4 <sup>a</sup> | 1838.1 | 1787.6 | 1813.2 | 1824.8 | 1805.2 | 1803.9 | 1809.5 | 1809.5 | 1809.5 | 1809.7 | 1809.5 | 1809.7 | 1809.6 | 1809.6 |
| gdb 5173 | 1844.3 <sup>a</sup> | 1849.5 | 1801.4 | 1822.9 | 1833.8 | 1814.3 | 1816.5 | 1817.7 | 1817.7 | 1817.7 | 1820.9 | 1817.7 | 1820.9 | 1820.9 | 1820.9 |
| gdb 5174 | 1849.5 <sup>a</sup> | 1853.8 | 1819.2 | 1839.0 | 1854.0 | 1839.2 | 1826.1 | 1832.7 | 1832.7 | 1832.7 | 1833.3 | 1832.7 | 1833.3 | 1833.3 | 1833.3 |

... continued on next page ...

Table S26: ... continued from previous page. ...

| Molecule | Ref.                | MNDO   | AMI    | PM3    | PM6    | PM7    | OM1    | OM2    |        | OM3    |        | D3T    | D3     | D3T    |
|----------|---------------------|--------|--------|--------|--------|--------|--------|--------|--------|--------|--------|--------|--------|--------|
|          |                     |        |        |        |        |        |        | D2     | D3     | D2     | D3     |        |        |        |
| gdb 5175 | 1851.9 <sup>a</sup> | 1854.5 | 1818.8 | 1838.9 | 1854.3 | 1840.5 | 1828.0 | 1835.1 | 1835.1 | 1835.8 | 1835.8 | 1835.1 | 1835.8 | 1835.8 |
| gdb 5176 | 1839.1 <sup>a</sup> | 1841.2 | 1802.6 | 1827.1 | 1841.4 | 1826.9 | 1811.9 | 1821.3 | 1821.3 | 1821.3 | 1819.2 | 1821.3 | 1819.2 | 1819.2 |
| gdb 5177 | 1848.6 <sup>a</sup> | 1856.6 | 1820.3 | 1841.3 | 1848.0 | 1834.5 | 1827.5 | 1833.2 | 1833.2 | 1833.2 | 1833.0 | 1833.2 | 1833.0 | 1833.0 |
| gdb 5178 | 1859.0 <sup>a</sup> | 1868.7 | 1834.5 | 1850.8 | 1857.6 | 1844.1 | 1841.5 | 1843.5 | 1843.5 | 1843.5 | 1845.4 | 1843.5 | 1845.4 | 1845.4 |
| gdb 5179 | 1849.2 <sup>a</sup> | 1856.3 | 1820.4 | 1839.1 | 1852.6 | 1838.9 | 1827.0 | 1832.8 | 1832.8 | 1832.8 | 1833.0 | 1832.8 | 1833.0 | 1833.0 |
| gdb 5180 | 1847.9 <sup>a</sup> | 1854.1 | 1815.1 | 1837.5 | 1847.3 | 1834.0 | 1826.2 | 1832.6 | 1832.6 | 1832.6 | 1833.1 | 1832.6 | 1833.1 | 1833.1 |
| gdb 5181 | 1845.4 <sup>a</sup> | 1856.9 | 1819.4 | 1840.1 | 1845.3 | 1832.0 | 1826.3 | 1831.4 | 1831.4 | 1831.4 | 1831.2 | 1831.4 | 1831.2 | 1831.2 |
| gdb 5182 | 1853.8 <sup>a</sup> | 1867.1 | 1834.6 | 1850.9 | 1856.6 | 1843.7 | 1836.7 | 1838.6 | 1838.6 | 1838.6 | 1842.2 | 1838.6 | 1842.2 | 1842.2 |
| gdb 5183 | 1889.3 <sup>a</sup> | 1875.7 | 1865.0 | 1874.0 | 1886.5 | 1878.3 | 1868.1 | 1882.2 | 1882.2 | 1882.2 | 1875.9 | 1882.2 | 1875.9 | 1875.9 |
| gdb 5184 | 1885.1 <sup>a</sup> | 1874.9 | 1864.5 | 1872.3 | 1882.4 | 1873.9 | 1865.8 | 1877.0 | 1877.0 | 1877.0 | 1870.4 | 1877.0 | 1870.4 | 1870.4 |
| gdb 5185 | 1891.0 <sup>a</sup> | 1882.3 | 1872.2 | 1877.7 | 1886.7 | 1879.3 | 1875.6 | 1882.4 | 1882.4 | 1882.4 | 1880.3 | 1882.4 | 1880.3 | 1880.3 |
| gdb 5186 | 1848.1 <sup>a</sup> | 1849.0 | 1818.5 | 1836.0 | 1850.1 | 1836.8 | 1826.6 | 1832.0 | 1832.0 | 1832.0 | 1832.0 | 1832.0 | 1832.0 | 1832.0 |
| gdb 5187 | 1855.3 <sup>a</sup> | 1851.4 | 1820.9 | 1839.4 | 1854.1 | 1841.4 | 1831.7 | 1837.0 | 1837.0 | 1837.0 | 1836.8 | 1837.0 | 1836.8 | 1836.9 |
| gdb 5188 | 1848.4 <sup>a</sup> | 1853.9 | 1824.7 | 1841.6 | 1850.8 | 1837.8 | 1831.2 | 1836.8 | 1836.8 | 1836.8 | 1835.4 | 1836.8 | 1835.4 | 1835.4 |
| gdb 5189 | 1856.6 <sup>a</sup> | 1864.2 | 1840.1 | 1852.4 | 1862.0 | 1849.6 | 1842.5 | 1845.1 | 1845.1 | 1845.1 | 1847.1 | 1845.1 | 1847.1 | 1847.1 |
| gdb 5190 | 1860.5 <sup>a</sup> | 1861.0 | 1840.9 | 1853.7 | 1864.9 | 1855.4 | 1841.4 | 1849.3 | 1849.3 | 1849.3 | 1846.0 | 1849.3 | 1846.0 | 1846.0 |
| gdb 5191 | 1858.2 <sup>a</sup> | 1864.2 | 1846.9 | 1856.8 | 1866.2 | 1855.7 | 1845.1 | 1853.6 | 1853.6 | 1853.6 | 1848.8 | 1853.6 | 1848.8 | 1848.8 |
| gdb 5192 | 1872.7 <sup>a</sup> | 1878.5 | 1863.7 | 1868.8 | 1879.7 | 1869.4 | 1864.8 | 1870.2 | 1870.2 | 1870.2 | 1868.2 | 1870.2 | 1868.2 | 1868.2 |
| gdb 5193 | 1867.0 <sup>a</sup> | 1874.9 | 1861.7 | 1867.7 | 1875.7 | 1865.1 | 1856.2 | 1861.6 | 1861.6 | 1861.6 | 1860.3 | 1861.6 | 1860.3 | 1860.3 |
| gdb 5194 | 1871.0 <sup>a</sup> | 1874.6 | 1857.3 | 1865.4 | 1875.2 | 1865.4 | 1857.7 | 1859.9 | 1859.9 | 1859.9 | 1859.8 | 1859.9 | 1859.8 | 1859.8 |
| gdb 5195 | 1862.4 <sup>a</sup> | 1853.0 | 1823.4 | 1842.5 | 1858.8 | 1847.3 | 1836.7 | 1850.4 | 1850.4 | 1850.4 | 1844.5 | 1850.4 | 1844.5 | 1844.5 |
| gdb 5196 | 1855.8 <sup>a</sup> | 1851.2 | 1824.1 | 1842.5 | 1854.0 | 1841.9 | 1832.3 | 1843.9 | 1843.9 | 1843.9 | 1838.2 | 1843.9 | 1838.2 | 1838.2 |
| gdb 5197 | 1864.8 <sup>a</sup> | 1862.5 | 1836.7 | 1850.7 | 1862.1 | 1850.1 | 1845.1 | 1852.4 | 1852.4 | 1852.4 | 1849.8 | 1852.4 | 1849.8 | 1849.8 |
| gdb 5198 | 1866.3 <sup>a</sup> | 1838.0 | 1838.0 | 1851.9 | 1865.9 | 1854.0 | 1847.3 | 1857.0 | 1857.0 | 1857.0 | 1854.8 | 1857.0 | 1854.8 | 1854.8 |
| gdb 5199 | 1867.1 <sup>a</sup> | 1863.8 | 1838.7 | 1853.1 | 1864.1 | 1852.9 | 1846.5 | 1854.6 | 1854.6 | 1854.6 | 1852.5 | 1854.6 | 1852.5 | 1852.5 |
| gdb 5200 | 1833.2 <sup>a</sup> | 1834.3 | 1790.2 | 1811.5 | 1828.0 | 1809.5 | 1805.1 | 1808.5 | 1808.5 | 1808.5 | 1809.4 | 1808.5 | 1809.4 | 1809.4 |
| gdb 5201 | 1836.1 <sup>a</sup> | 1833.7 | 1787.2 | 1814.1 | 1831.5 | 1810.7 | 1807.7 | 1810.4 | 1810.4 | 1810.4 | 1811.1 | 1810.4 | 1811.1 | 1811.1 |
| gdb 5202 | 1837.9 <sup>a</sup> | 1835.6 | 1793.6 | 1814.8 | 1829.5 | 1810.9 | 1806.6 | 1811.2 | 1811.2 | 1811.2 | 1811.4 | 1811.2 | 1811.4 | 1811.4 |
| gdb 5203 | 1841.8 <sup>a</sup> | 1845.5 | 1804.1 | 1825.9 | 1835.5 | 1816.8 | 1817.4 | 1817.3 | 1817.3 | 1817.3 | 1820.9 | 1817.3 | 1820.9 | 1820.9 |
| gdb 5204 | 1846.7 <sup>a</sup> | 1851.5 | 1818.9 | 1836.2 | 1849.8 | 1836.6 | 1825.9 | 1830.5 | 1830.5 | 1830.5 | 1831.2 | 1830.5 | 1831.2 | 1831.2 |
| gdb 5205 | 1854.7 <sup>a</sup> | 1853.3 | 1821.2 | 1839.4 | 1853.6 | 1841.0 | 1829.6 | 1834.3 | 1834.3 | 1834.3 | 1834.8 | 1834.3 | 1834.8 | 1834.8 |
| gdb 5206 | 1845.8 <sup>a</sup> | 1853.6 | 1823.4 | 1840.8 | 1849.4 | 1836.3 | 1827.1 | 1832.0 | 1832.0 | 1832.0 | 1832.1 | 1832.0 | 1832.1 | 1832.1 |
| gdb 5207 | 1855.0 <sup>a</sup> | 1865.9 | 1839.6 | 1852.5 | 1861.2 | 1848.1 | 1841.1 | 1843.3 | 1843.3 | 1843.3 | 1846.0 | 1843.3 | 1846.0 | 1846.0 |
| gdb 5208 | 1849.3 <sup>a</sup> | 1854.7 | 1819.9 | 1838.9 | 1852.7 | 1838.4 | 1826.2 | 1832.4 | 1832.4 | 1832.4 | 1832.6 | 1832.4 | 1832.6 | 1832.6 |
| gdb 5209 | 1852.0 <sup>a</sup> | 1854.5 | 1818.8 | 1838.7 | 1853.5 | 1839.7 | 1827.4 | 1834.0 | 1834.0 | 1834.0 | 1834.6 | 1834.0 | 1834.6 | 1834.5 |
| gdb 5210 | 1848.9 <sup>a</sup> | 1852.7 | 1814.0 | 1837.4 | 1848.4 | 1835.0 | 1825.1 | 1830.5 | 1830.5 | 1830.5 | 1831.9 | 1830.5 | 1831.9 | 1831.9 |
| gdb 5211 | 1847.6 <sup>a</sup> | 1855.8 | 1819.3 | 1840.4 | 1846.9 | 1833.2 | 1826.5 | 1832.2 | 1832.2 | 1832.2 | 1832.2 | 1832.2 | 1832.2 | 1832.2 |
| gdb 5212 | 1855.1 <sup>a</sup> | 1867.0 | 1834.4 | 1851.1 | 1856.9 | 1843.3 | 1837.4 | 1839.6 | 1839.6 | 1839.6 | 1843.2 | 1839.6 | 1843.2 | 1843.2 |
| gdb 5213 | 1836.8 <sup>a</sup> | 1838.4 | 1790.9 | 1813.9 | 1831.6 | 1812.7 | 1806.7 | 1812.3 | 1812.3 | 1812.3 | 1812.8 | 1812.3 | 1812.8 | 1812.8 |
| gdb 5214 | 1836.3 <sup>a</sup> | 1837.4 | 1790.2 | 1813.9 | 1832.5 | 1813.1 | 1805.8 | 1811.8 | 1811.8 | 1811.8 | 1812.5 | 1811.8 | 1812.5 | 1812.5 |
| gdb 5215 | 1839.8 <sup>a</sup> | 1839.8 | 1789.1 | 1815.2 | 1830.2 | 1812.0 | 1809.7 | 1815.3 | 1815.3 | 1815.3 | 1815.3 | 1815.3 | 1815.3 | 1815.3 |
| gdb 5216 | 1828.4 <sup>a</sup> | 1827.8 | 1775.2 | 1803.2 | 1824.3 | 1806.2 | 1797.2 | 1809.1 | 1809.1 | 1809.1 | 1804.8 | 1809.1 | 1804.8 | 1804.8 |
| gdb 5217 | 1839.0 <sup>a</sup> | 1838.9 | 1788.9 | 1813.9 | 1826.2 | 1806.7 | 1805.9 | 1812.0 | 1812.0 | 1812.0 | 1811.7 | 1812.0 | 1811.7 | 1811.7 |
| gdb 5218 | 1829.7 <sup>a</sup> | 1827.3 | 1776.8 | 1804.0 | 1822.4 | 1803.1 | 1796.1 | 1805.8 | 1805.7 | 1805.7 | 1802.3 | 1805.7 | 1802.3 | 1802.3 |
| gdb 5219 | 1846.1 <sup>a</sup> | 1850.3 | 1804.1 | 1825.3 | 1837.7 | 1818.4 | 1818.0 | 1819.9 | 1819.9 | 1819.9 | 1823.6 | 1819.9 | 1823.6 | 1823.6 |

... continued on next page ...

Table S26: ... continued from previous page ...

| Molecule | Ref.                | MNDO   | AMI    | PM3    | PM6    | PM7    | OM1    | OM2    |        | OM3    |        | D3T    |
|----------|---------------------|--------|--------|--------|--------|--------|--------|--------|--------|--------|--------|--------|
|          |                     |        |        |        |        |        |        | D2     | D3     | D2     | D3     |        |
| gdb 5220 | 1852.6 <sup>a</sup> | 1847.3 | 1813.8 | 1831.3 | 1848.8 | 1833.8 | 1827.6 | 1838.1 | 1838.1 | 1833.9 | 1833.9 | 1833.9 |
| gdb 5221 | 1856.3 <sup>a</sup> | 1849.2 | 1815.4 | 1832.3 | 1845.1 | 1829.6 | 1826.9 | 1835.8 | 1836.3 | 1832.3 | 1832.2 | 1832.2 |
| gdb 5222 | 1862.2 <sup>a</sup> | 1860.0 | 1830.1 | 1843.0 | 1856.3 | 1840.5 | 1838.0 | 1844.2 | 1844.2 | 1843.7 | 1843.7 | 1843.7 |
| gdb 5223 | 1858.4 <sup>a</sup> | 1857.7 | 1827.3 | 1840.8 | 1853.8 | 1839.3 | 1838.3 | 1842.9 | 1842.9 | 1842.3 | 1842.3 | 1842.3 |
| gdb 5224 | 1850.0 <sup>a</sup> | 1867.4 | 1838.2 | 1856.4 | 1867.3 | 1853.9 | 1837.3 | 1845.4 | 1845.4 | 1839.2 | 1839.2 | 1839.2 |
| gdb 5225 | 1859.3 <sup>a</sup> | 1879.8 | 1852.3 | 1866.7 | 1876.2 | 1863.9 | 1849.8 | 1854.0 | 1854.0 | 1851.3 | 1851.3 | 1851.3 |
| gdb 5226 | 1856.5 <sup>a</sup> | 1877.9 | 1852.2 | 1866.5 | 1875.7 | 1862.3 | 1846.8 | 1851.3 | 1851.3 | 1848.7 | 1848.7 | 1848.7 |
| gdb 5227 | 1848.8 <sup>a</sup> | 1855.3 | 1820.1 | 1839.0 | 1852.3 | 1838.5 | 1825.5 | 1831.1 | 1831.1 | 1831.9 | 1831.9 | 1831.9 |
| gdb 5228 | 1848.6 <sup>a</sup> | 1854.0 | 1819.1 | 1838.6 | 1853.2 | 1838.8 | 1824.6 | 1830.9 | 1830.8 | 1831.5 | 1831.5 | 1831.5 |
| gdb 5229 | 1848.1 <sup>a</sup> | 1854.2 | 1814.2 | 1837.0 | 1847.4 | 1834.4 | 1824.4 | 1828.9 | 1828.8 | 1830.5 | 1830.5 | 1830.5 |
| gdb 5230 | 1844.7 <sup>a</sup> | 1856.4 | 1819.1 | 1839.3 | 1844.8 | 1831.7 | 1823.4 | 1826.7 | 1826.7 | 1827.8 | 1827.7 | 1827.7 |
| gdb 5231 | 1838.5 <sup>a</sup> | 1842.2 | 1802.6 | 1826.5 | 1840.1 | 1826.3 | 1811.0 | 1819.2 | 1819.2 | 1817.3 | 1817.3 | 1817.3 |
| gdb 5232 | 1856.8 <sup>a</sup> | 1868.8 | 1835.8 | 1851.2 | 1857.9 | 1844.9 | 1838.5 | 1840.2 | 1840.2 | 1843.7 | 1843.7 | 1843.7 |
| gdb 5233 | 1848.2 <sup>a</sup> | 1857.9 | 1820.5 | 1839.0 | 1852.4 | 1838.9 | 1826.2 | 1831.6 | 1831.6 | 1832.3 | 1832.3 | 1832.3 |
| gdb 5234 | 1845.8 <sup>a</sup> | 1857.1 | 1820.7 | 1839.1 | 1852.2 | 1837.6 | 1824.2 | 1829.0 | 1829.0 | 1829.6 | 1829.6 | 1829.6 |
| gdb 5235 | 1843.8 <sup>a</sup> | 1855.5 | 1815.7 | 1837.3 | 1845.3 | 1831.7 | 1822.0 | 1827.3 | 1827.3 | 1827.8 | 1827.8 | 1827.8 |
| gdb 5236 | 1846.9 <sup>a</sup> | 1855.9 | 1815.2 | 1837.2 | 1846.5 | 1833.4 | 1824.9 | 1830.5 | 1830.5 | 1831.4 | 1831.4 | 1831.4 |
| gdb 5237 | 1842.1 <sup>a</sup> | 1857.3 | 1818.3 | 1838.8 | 1843.0 | 1829.8 | 1822.8 | 1826.7 | 1826.7 | 1827.9 | 1827.9 | 1827.9 |
| gdb 5238 | 1835.7 <sup>a</sup> | 1844.7 | 1804.2 | 1827.0 | 1839.4 | 1825.2 | 1810.3 | 1817.9 | 1817.9 | 1815.8 | 1815.8 | 1815.8 |
| gdb 5239 | 1852.1 <sup>a</sup> | 1868.8 | 1833.0 | 1848.3 | 1856.2 | 1841.8 | 1837.6 | 1837.5 | 1837.5 | 1841.1 | 1841.1 | 1841.1 |
| gdb 5240 | 1884.9 <sup>a</sup> | 1878.8 | 1868.3 | 1876.1 | 1886.2 | 1876.3 | 1862.8 | 1876.9 | 1876.9 | 1870.8 | 1870.8 | 1870.8 |
| gdb 5241 | 1887.6 <sup>a</sup> | 1879.0 | 1866.9 | 1875.3 | 1886.6 | 1877.5 | 1865.3 | 1879.2 | 1879.2 | 1873.1 | 1873.1 | 1873.1 |
| gdb 5242 | 1877.5 <sup>a</sup> | 1872.9 | 1860.4 | 1869.4 | 1877.3 | 1869.3 | 1858.0 | 1868.5 | 1868.5 | 1865.0 | 1865.0 | 1865.0 |
| gdb 5243 | 1889.8 <sup>a</sup> | 1885.5 | 1876.9 | 1881.4 | 1889.6 | 1881.2 | 1872.8 | 1880.2 | 1880.2 | 1879.4 | 1879.4 | 1879.4 |
| gdb 5244 | 1892.3 <sup>a</sup> | 1886.8 | 1876.4 | 1881.1 | 1889.3 | 1881.9 | 1875.3 | 1882.4 | 1882.4 | 1881.8 | 1881.7 | 1881.7 |
| gdb 5245 | 1863.0 <sup>a</sup> | 1854.4 | 1823.7 | 1842.5 | 1858.8 | 1847.5 | 1837.6 | 1851.2 | 1851.2 | 1845.2 | 1845.2 | 1845.2 |
| gdb 5246 | 1855.9 <sup>a</sup> | 1853.0 | 1824.4 | 1842.3 | 1852.6 | 1841.1 | 1834.0 | 1844.2 | 1844.2 | 1838.0 | 1838.0 | 1838.0 |
| gdb 5247 | 1855.1 <sup>a</sup> | 1850.7 | 1823.3 | 1841.0 | 1855.5 | 1842.6 | 1832.8 | 1846.3 | 1846.3 | 1840.2 | 1840.2 | 1840.2 |
| gdb 5248 | 1864.8 <sup>a</sup> | 1863.6 | 1836.7 | 1850.6 | 1863.9 | 1849.8 | 1845.3 | 1852.0 | 1852.0 | 1849.6 | 1849.6 | 1849.6 |
| gdb 5249 | 1862.9 <sup>a</sup> | 1861.4 | 1838.0 | 1851.7 | 1865.6 | 1852.7 | 1844.1 | 1854.1 | 1854.1 | 1852.0 | 1851.9 | 1851.9 |
| gdb 5250 | 1867.1 <sup>a</sup> | 1864.5 | 1838.5 | 1853.0 | 1864.0 | 1852.9 | 1846.3 | 1854.3 | 1854.3 | 1852.3 | 1852.3 | 1852.3 |
| gdb 5251 | 1860.6 <sup>a</sup> | 1865.3 | 1842.1 | 1854.5 | 1865.7 | 1855.9 | 1841.3 | 1848.2 | 1848.2 | 1845.6 | 1845.6 | 1845.6 |
| gdb 5252 | 1858.7 <sup>a</sup> | 1867.1 | 1847.4 | 1857.3 | 1865.5 | 1854.6 | 1843.4 | 1851.4 | 1851.4 | 1847.3 | 1847.3 | 1847.3 |
| gdb 5253 | 1860.6 <sup>a</sup> | 1867.7 | 1849.0 | 1858.4 | 1869.0 | 1857.4 | 1847.3 | 1855.8 | 1855.8 | 1851.6 | 1851.6 | 1851.6 |
| gdb 5254 | 1867.9 <sup>a</sup> | 1879.8 | 1863.1 | 1869.0 | 1877.0 | 1866.1 | 1857.5 | 1861.2 | 1861.2 | 1860.6 | 1860.6 | 1860.6 |
| gdb 5255 | 1869.7 <sup>a</sup> | 1880.4 | 1864.7 | 1869.9 | 1879.9 | 1868.3 | 1861.0 | 1865.9 | 1865.9 | 1864.6 | 1864.6 | 1864.6 |
| gdb 5256 | 1868.8 <sup>a</sup> | 1876.7 | 1857.4 | 1865.8 | 1875.3 | 1865.4 | 1857.0 | 1858.3 | 1858.3 | 1859.0 | 1859.0 | 1859.0 |
| gdb 5257 | 1873.2 <sup>a</sup> | 1883.2 | 1874.9 | 1877.4 | 1881.4 | 1876.0 | 1866.0 | 1868.9 | 1868.9 | 1868.2 | 1868.2 | 1868.2 |
| gdb 5258 | 1870.6 <sup>a</sup> | 1895.0 | 1888.8 | 1888.9 | 1891.0 | 1885.6 | 1883.0 | 1882.2 | 1882.2 | 1884.2 | 1884.2 | 1884.2 |
| gdb 5259 | 1888.6 <sup>a</sup> | 1879.6 | 1878.3 | 1881.5 | 1891.7 | 1885.9 | 1878.6 | 1896.7 | 1896.7 | 1886.1 | 1886.1 | 1886.1 |
| gdb 5260 | 1889.9 <sup>a</sup> | 1879.6 | 1876.8 | 1880.4 | 1891.4 | 1886.6 | 1880.6 | 1898.2 | 1898.2 | 1887.9 | 1887.9 | 1887.9 |
| gdb 5261 | 1884.5 <sup>a</sup> | 1876.0 | 1874.5 | 1877.0 | 1884.6 | 1879.5 | 1873.5 | 1887.2 | 1887.2 | 1878.6 | 1878.6 | 1878.6 |
| gdb 5262 | 1887.4 <sup>a</sup> | 1878.9 | 1874.4 | 1878.4 | 1888.1 | 1883.3 | 1877.3 | 1891.3 | 1891.3 | 1881.9 | 1881.9 | 1881.9 |
| gdb 5263 | 1879.0 <sup>a</sup> | 1872.2 | 1871.0 | 1873.9 | 1881.9 | 1876.9 | 1868.1 | 1882.5 | 1882.5 | 1875.1 | 1875.1 | 1875.1 |
| gdb 5264 | 1889.4 <sup>a</sup> | 1883.3 | 1884.3 | 1884.2 | 1891.1 | 1886.8 | 1881.6 | 1892.6 | 1892.6 | 1888.5 | 1888.5 | 1888.5 |

... continued on next page ...



Table S26: ... continued from previous page. ...

| Molecule | Ref.                | MNDO   | AMI    | PM3    | PM6    | PM7    | OM1    |        | OM2    |        | OM3    |        | D3T    |
|----------|---------------------|--------|--------|--------|--------|--------|--------|--------|--------|--------|--------|--------|--------|
|          |                     |        |        |        |        |        | OM1    | OM2    | D2     | D3     | D3T    | D2     |        |
| gdb 5265 | 1893.6 <sup>a</sup> | 1887.5 | 1885.3 | 1886.4 | 1894.7 | 1891.1 | 1886.5 | 1897.1 | 1897.0 | 1897.0 | 1892.7 | 1892.7 | 1892.7 |
| gdb 5266 | 1887.6 <sup>a</sup> | 1883.0 | 1885.6 | 1884.7 | 1891.0 | 1886.0 | 1879.2 | 1890.4 | 1890.4 | 1890.4 | 1886.7 | 1886.7 | 1886.7 |
| gdb 5267 | 1869.3 <sup>a</sup> | 1881.7 | 1868.1 | 1871.7 | 1880.4 | 1872.8 | 1865.1 | 1870.5 | 1870.5 | 1870.5 | 1868.3 | 1868.3 | 1868.3 |
| gdb 5268 | 1868.1 <sup>a</sup> | 1878.0 | 1865.2 | 1869.5 | 1877.3 | 1869.2 | 1859.9 | 1864.0 | 1864.0 | 1864.0 | 1862.2 | 1862.2 | 1862.2 |
| gdb 5269 | 1879.7 <sup>a</sup> | 1893.4 | 1870.6 | 1886.6 | 1893.9 | 1885.1 | 1873.0 | 1878.3 | 1878.3 | 1878.3 | 1877.5 | 1877.5 | 1877.5 |
| gdb 5270 | 1900.7 <sup>a</sup> | 1900.8 | 1876.9 | 1894.2 | 1902.5 | 1893.8 | 1884.2 | 1887.9 | 1887.9 | 1887.9 | 1886.2 | 1886.2 | 1886.2 |
| gdb 5271 | 1873.9 <sup>a</sup> | 1892.6 | 1869.9 | 1885.5 | 1888.5 | 1880.2 | 1869.1 | 1873.9 | 1873.9 | 1873.9 | 1872.8 | 1872.8 | 1872.8 |
| gdb 5272 | 1873.7 <sup>a</sup> | 1895.9 | 1874.7 | 1889.2 | 1893.6 | 1884.9 | 1874.1 | 1880.2 | 1880.2 | 1880.2 | 1878.2 | 1878.2 | 1878.2 |
| gdb 5273 | 1881.0 <sup>a</sup> | 1906.4 | 1888.4 | 1899.4 | 1901.8 | 1893.1 | 1883.6 | 1885.9 | 1885.9 | 1885.9 | 1887.6 | 1887.6 | 1887.6 |
| gdb 5274 | 1841.7 <sup>a</sup> | 1848.8 | 1822.0 | 1837.0 | 1846.3 | 1839.0 | 1828.1 | 1833.6 | 1833.6 | 1833.6 | 1825.8 | 1825.8 | 1825.8 |
| gdb 5275 | 1843.8 <sup>a</sup> | 1847.8 | 1820.7 | 1836.6 | 1847.9 | 1840.9 | 1829.6 | 1835.8 | 1835.8 | 1835.8 | 1827.8 | 1827.8 | 1827.8 |
| gdb 5276 | 1838.6 <sup>a</sup> | 1851.0 | 1825.0 | 1839.7 | 1849.3 | 1841.9 | 1832.1 | 1838.2 | 1838.2 | 1838.2 | 1829.4 | 1829.3 | 1829.3 |
| gdb 5277 | 1837.6 <sup>a</sup> | 1850.6 | 1824.6 | 1837.8 | 1850.1 | 1838.1 | 1825.9 | 1832.6 | 1832.6 | 1832.6 | 1826.5 | 1826.5 | 1826.5 |
| gdb 5278 | 1847.4 <sup>a</sup> | 1861.7 | 1839.4 | 1850.3 | 1859.0 | 1851.2 | 1842.7 | 1844.9 | 1844.9 | 1844.9 | 1840.0 | 1840.0 | 1840.0 |
| gdb 5279 | 1846.5 <sup>a</sup> | 1861.0 | 1838.6 | 1848.4 | 1860.7 | 1848.0 | 1836.8 | 1838.8 | 1838.8 | 1838.8 | 1837.0 | 1837.0 | 1837.0 |
| gdb 5280 | 1849.7 <sup>a</sup> | 1862.2 | 1838.6 | 1848.4 | 1861.5 | 1849.5 | 1838.9 | 1841.2 | 1841.2 | 1841.2 | 1839.6 | 1839.6 | 1839.6 |
| gdb 5281 | 1865.3 <sup>a</sup> | 1870.6 | 1851.6 | 1863.5 | 1867.8 | 1861.3 | 1855.7 | 1856.2 | 1856.2 | 1856.2 | 1856.8 | 1856.8 | 1856.8 |
| gdb 5282 | 1868.4 <sup>a</sup> | 1869.9 | 1850.4 | 1863.1 | 1868.6 | 1862.8 | 1857.4 | 1858.3 | 1858.3 | 1858.3 | 1859.1 | 1859.1 | 1859.1 |
| gdb 5283 | 1864.8 <sup>a</sup> | 1874.2 | 1855.6 | 1866.6 | 1868.2 | 1862.5 | 1860.1 | 1861.3 | 1861.3 | 1861.3 | 1861.2 | 1861.2 | 1861.2 |
| gdb 5284 | 1871.8 <sup>a</sup> | 1885.4 | 1871.1 | 1878.2 | 1879.3 | 1874.1 | 1873.8 | 1871.9 | 1871.8 | 1871.8 | 1873.8 | 1873.8 | 1873.8 |
| gdb 5285 | 1872.3 <sup>a</sup> | 1886.1 | 1873.3 | 1879.6 | 1884.5 | 1877.8 | 1865.9 | 1872.6 | 1872.6 | 1872.6 | 1866.1 | 1866.1 | 1866.1 |
| gdb 5286 | 1886.0 <sup>a</sup> | 1899.0 | 1888.5 | 1891.0 | 1896.3 | 1889.8 | 1880.8 | 1883.1 | 1883.1 | 1883.1 | 1880.7 | 1880.7 | 1880.7 |
| gdb 5287 | 1881.6 <sup>a</sup> | 1896.1 | 1886.7 | 1889.9 | 1892.9 | 1886.1 | 1876.0 | 1878.9 | 1878.9 | 1878.9 | 1876.2 | 1876.2 | 1876.2 |
| gdb 5288 | 1898.5 <sup>a</sup> | 1901.2 | 1877.9 | 1894.0 | 1901.1 | 1892.2 | 1883.4 | 1886.9 | 1886.9 | 1886.9 | 1884.8 | 1884.8 | 1884.8 |
| gdb 5289 | 1877.5 <sup>a</sup> | 1894.1 | 1871.6 | 1886.3 | 1892.1 | 1883.4 | 1872.4 | 1876.9 | 1876.9 | 1876.9 | 1875.9 | 1875.9 | 1875.9 |
| gdb 5290 | 1877.3 <sup>a</sup> | 1893.2 | 1868.9 | 1884.7 | 1889.4 | 1882.0 | 1872.4 | 1877.2 | 1877.2 | 1877.2 | 1875.7 | 1875.7 | 1875.7 |
| gdb 5291 | 1871.8 <sup>a</sup> | 1896.3 | 1874.1 | 1888.2 | 1890.6 | 1883.3 | 1874.6 | 1880.0 | 1880.0 | 1880.0 | 1877.4 | 1877.4 | 1877.4 |
| gdb 5292 | 1882.2 <sup>a</sup> | 1907.8 | 1889.0 | 1899.4 | 1901.9 | 1894.3 | 1885.4 | 1886.9 | 1886.9 | 1886.9 | 1888.4 | 1888.4 | 1888.4 |
| gdb 5293 | 1874.8 <sup>a</sup> | 1888.1 | 1874.4 | 1879.9 | 1885.7 | 1879.1 | 1867.5 | 1874.0 | 1874.0 | 1874.0 | 1867.5 | 1867.5 | 1867.5 |
| gdb 5294 | 1883.3 <sup>a</sup> | 1898.5 | 1888.2 | 1890.6 | 1895.1 | 1888.3 | 1878.3 | 1880.7 | 1880.7 | 1880.7 | 1878.1 | 1878.0 | 1878.0 |
| gdb 5295 | 1883.1 <sup>a</sup> | 1897.8 | 1885.2 | 1889.1 | 1893.4 | 1887.1 | 1877.4 | 1880.4 | 1880.3 | 1880.3 | 1877.4 | 1877.4 | 1877.4 |
| gdb 5296 | 1849.1 <sup>a</sup> | 1844.2 | 1813.8 | 1830.0 | 1846.8 | 1831.6 | 1825.3 | 1835.9 | 1835.9 | 1835.9 | 1831.2 | 1831.2 | 1831.2 |
| gdb 5297 | 1851.4 <sup>a</sup> | 1844.2 | 1812.3 | 1829.1 | 1847.1 | 1832.8 | 1828.4 | 1838.9 | 1838.9 | 1838.9 | 1834.2 | 1834.2 | 1834.2 |
| gdb 5298 | 1844.9 <sup>a</sup> | 1843.4 | 1811.0 | 1828.1 | 1844.1 | 1826.8 | 1825.7 | 1834.1 | 1834.1 | 1834.1 | 1829.4 | 1829.4 | 1829.4 |
| gdb 5299 | 1852.7 <sup>a</sup> | 1845.8 | 1813.9 | 1830.5 | 1844.5 | 1829.7 | 1825.5 | 1835.6 | 1835.6 | 1835.6 | 1831.2 | 1831.2 | 1831.2 |
| gdb 5300 | 1854.5 <sup>a</sup> | 1852.9 | 1826.5 | 1839.1 | 1852.6 | 1837.5 | 1835.5 | 1840.7 | 1840.7 | 1840.7 | 1839.6 | 1839.6 | 1839.6 |
| gdb 5301 | 1860.2 <sup>a</sup> | 1856.1 | 1828.8 | 1841.6 | 1854.4 | 1839.0 | 1836.6 | 1843.4 | 1843.4 | 1843.4 | 1842.6 | 1842.6 | 1842.6 |
| gdb 5302 | 1864.0 <sup>a</sup> | 1857.6 | 1829.0 | 1841.5 | 1855.0 | 1840.8 | 1840.6 | 1847.1 | 1847.0 | 1847.0 | 1846.4 | 1846.4 | 1846.4 |
| gdb 5303 | 1859.5 <sup>a</sup> | 1862.6 | 1840.6 | 1852.9 | 1864.1 | 1854.9 | 1841.2 | 1847.9 | 1847.9 | 1847.9 | 1845.0 | 1845.0 | 1845.0 |
| gdb 5304 | 1856.3 <sup>a</sup> | 1862.3 | 1841.4 | 1853.4 | 1863.4 | 1853.1 | 1840.5 | 1845.5 | 1845.5 | 1845.5 | 1842.5 | 1842.5 | 1842.5 |
| gdb 5305 | 1857.0 <sup>a</sup> | 1865.9 | 1847.6 | 1857.1 | 1866.9 | 1856.5 | 1846.4 | 1854.3 | 1854.3 | 1854.3 | 1850.0 | 1849.9 | 1849.9 |
| gdb 5306 | 1867.7 <sup>a</sup> | 1874.3 | 1857.3 | 1865.1 | 1874.2 | 1863.6 | 1854.6 | 1856.0 | 1856.0 | 1856.0 | 1856.2 | 1856.2 | 1856.2 |
| gdb 5307 | 1869.3 <sup>a</sup> | 1878.2 | 1864.1 | 1869.2 | 1879.4 | 1868.2 | 1861.1 | 1866.0 | 1866.0 | 1866.0 | 1864.3 | 1864.3 | 1864.3 |
| gdb 5308 | 1869.5 <sup>a</sup> | 1878.6 | 1861.8 | 1867.5 | 1876.2 | 1866.5 | 1859.6 | 1863.3 | 1863.3 | 1863.3 | 1862.7 | 1862.7 | 1862.7 |
| gdb 5309 | 1914.1 <sup>a</sup> | 1922.6 | 1919.6 | 1921.1 | 1919.5 | 1918.5 | 1912.8 | 1918.4 | 1918.4 | 1918.4 | 1920.5 | 1920.5 | 1920.5 |

... continued on next page ...

Table S26: ... continued from previous page. ...

| Molecule | Ref.                | MNDO   | AMI    | PM3    | PM6    | PM7    | OM1    |        | OM2    |        | OM3    |        | D3T    |
|----------|---------------------|--------|--------|--------|--------|--------|--------|--------|--------|--------|--------|--------|--------|
|          |                     |        |        |        |        |        | OM1    | OM2    | D2     | D3     | D2     | D3     |        |
| gdb 5310 | 1925.3 <sup>a</sup> | 1921.1 | 1913.4 | 1920.4 | 1921.0 | 1918.2 | 1911.8 | 1919.8 | 1919.8 | 1917.9 | 1917.9 | 1917.9 | 1917.9 |
| gdb 5311 | 1860.5 <sup>a</sup> | 1865.1 | 1842.7 | 1853.7 | 1868.3 | 1856.9 | 1850.9 | 1861.1 | 1861.1 | 1858.2 | 1858.2 | 1858.2 | 1858.2 |
| gdb 5312 | 1882.0 <sup>a</sup> | 1888.3 | 1878.6 | 1881.7 | 1884.9 | 1883.4 | 1876.2 | 1881.2 | 1881.2 | 1877.0 | 1876.9 | 1876.9 | 1876.9 |
| gdb 5313 | 1909.4 <sup>a</sup> | 1923.1 | 1920.2 | 1922.4 | 1924.9 | 1920.6 | 1911.7 | 1918.1 | 1918.1 | 1920.5 | 1920.4 | 1920.4 | 1920.4 |
| gdb 5314 | 1882.5 <sup>a</sup> | 1888.7 | 1879.0 | 1881.9 | 1886.2 | 1884.4 | 1877.2 | 1882.1 | 1882.1 | 1877.9 | 1877.9 | 1877.9 | 1877.9 |
| gdb 5315 | 1914.0 <sup>a</sup> | 1923.9 | 1920.3 | 1922.3 | 1923.2 | 1920.6 | 1913.7 | 1919.6 | 1919.6 | 1921.6 | 1921.6 | 1921.6 | 1921.6 |
| gdb 5316 | 1925.8 <sup>a</sup> | 1921.2 | 1913.4 | 1920.1 | 1921.4 | 1918.4 | 1911.8 | 1920.2 | 1920.1 | 1918.1 | 1918.0 | 1918.0 | 1918.0 |
| gdb 5317 | 1896.2 <sup>a</sup> | 1910.1 | 1904.8 | 1906.5 | 1901.7 | 1901.1 | 1898.8 | 1903.0 | 1903.0 | 1901.4 | 1901.4 | 1901.4 | 1901.4 |
| gdb 5318 | 1902.9 <sup>a</sup> | 1920.2 | 1917.6 | 1916.0 | 1907.2 | 1907.9 | 1908.9 | 1907.8 | 1907.8 | 1909.8 | 1909.8 | 1909.8 | 1909.8 |
| gdb 5319 | 1864.9 <sup>a</sup> | 1888.2 | 1868.7 | 1871.5 | 1880.9 | 1869.9 | 1865.2 | 1866.9 | 1866.9 | 1865.2 | 1865.2 | 1865.2 | 1865.2 |
| gdb 5320 | 1864.3 <sup>a</sup> | 1884.5 | 1866.0 | 1869.2 | 1878.1 | 1866.9 | 1860.6 | 1860.8 | 1860.8 | 1859.6 | 1859.6 | 1859.6 | 1859.6 |
| gdb 5321 | 1911.5 <sup>a</sup> | 1918.0 | 1916.2 | 1916.7 | 1915.6 | 1914.4 | 1910.9 | 1915.8 | 1915.8 | 1917.4 | 1917.4 | 1917.4 | 1917.4 |
| gdb 5322 | 1913.7 <sup>a</sup> | 1919.7 | 1915.3 | 1917.1 | 1915.4 | 1915.0 | 1913.0 | 1917.5 | 1917.5 | 1919.0 | 1919.0 | 1919.0 | 1919.0 |
| gdb 5323 | 1910.2 <sup>a</sup> | 1916.5 | 1915.3 | 1917.0 | 1916.0 | 1913.6 | 1909.1 | 1914.9 | 1914.9 | 1916.4 | 1916.4 | 1916.4 | 1916.4 |
| gdb 5324 | 1912.6 <sup>a</sup> | 1917.7 | 1913.5 | 1915.8 | 1916.1 | 1914.6 | 1912.1 | 1917.2 | 1917.2 | 1918.6 | 1918.6 | 1918.6 | 1918.6 |
| gdb 5325 | 1925.0 <sup>a</sup> | 1915.0 | 1909.3 | 1916.5 | 1920.2 | 1917.1 | 1912.0 | 1920.0 | 1920.0 | 1917.7 | 1917.7 | 1917.7 | 1917.7 |
| gdb 5326 | 1902.1 <sup>a</sup> | 1909.9 | 1910.8 | 1909.4 | 1910.9 | 1910.0 | 1900.1 | 1907.5 | 1907.5 | 1905.4 | 1905.4 | 1905.4 | 1905.4 |
| gdb 5327 | 1918.8 <sup>a</sup> | 1919.4 | 1919.4 | 1920.3 | 1922.5 | 1918.8 | 1910.5 | 1915.6 | 1915.6 | 1912.9 | 1912.9 | 1912.9 | 1912.9 |
| gdb 5328 | 1912.0 <sup>a</sup> | 1920.9 | 1923.9 | 1918.4 | 1920.1 | 1918.2 | 1912.1 | 1915.7 | 1915.7 | 1917.3 | 1917.3 | 1917.3 | 1917.3 |
| gdb 5329 | 1907.8 <sup>a</sup> | 1919.1 | 1916.4 | 1917.5 | 1916.7 | 1915.7 | 1910.6 | 1915.5 | 1915.5 | 1917.3 | 1917.3 | 1917.3 | 1917.3 |
| gdb 5330 | 1908.1 <sup>a</sup> | 1919.6 | 1913.4 | 1916.3 | 1913.2 | 1913.5 | 1910.6 | 1914.7 | 1914.7 | 1916.3 | 1916.3 | 1916.3 | 1916.3 |
| gdb 5331 | 1880.6 <sup>a</sup> | 1884.4 | 1875.7 | 1877.4 | 1881.3 | 1879.9 | 1875.5 | 1879.3 | 1879.3 | 1874.7 | 1874.6 | 1874.6 | 1874.6 |
| gdb 5332 | 1881.1 <sup>a</sup> | 1885.4 | 1875.0 | 1878.2 | 1881.5 | 1880.5 | 1875.4 | 1880.5 | 1880.5 | 1875.5 | 1875.5 | 1875.5 | 1875.5 |
| gdb 5333 | 1885.9 <sup>a</sup> | 1897.2 | 1891.5 | 1889.2 | 1895.3 | 1889.2 | 1884.4 | 1886.7 | 1886.7 | 1887.3 | 1887.3 | 1887.3 | 1887.3 |
| gdb 5334 | 1911.4 <sup>a</sup> | 1919.3 | 1916.6 | 1917.2 | 1916.3 | 1914.8 | 1911.0 | 1915.7 | 1915.7 | 1917.4 | 1917.4 | 1917.4 | 1917.4 |
| gdb 5335 | 1925.2 <sup>a</sup> | 1916.2 | 1909.1 | 1915.9 | 1918.9 | 1916.1 | 1912.1 | 1919.6 | 1919.6 | 1917.2 | 1917.2 | 1917.2 | 1917.2 |
| gdb 5336 | 1894.2 <sup>a</sup> | 1918.5 | 1915.7 | 1917.5 | 1917.6 | 1916.3 | 1911.0 | 1917.2 | 1917.2 | 1918.8 | 1918.8 | 1918.8 | 1918.8 |
| gdb 5337 | 1890.2 <sup>a</sup> | 1905.5 | 1901.6 | 1903.5 | 1900.3 | 1900.5 | 1899.2 | 1903.1 | 1903.1 | 1901.6 | 1901.6 | 1901.6 | 1901.6 |
| gdb 5338 | 1900.2 <sup>a</sup> | 1915.6 | 1915.3 | 1913.1 | 1905.9 | 1906.3 | 1907.5 | 1906.2 | 1906.2 | 1908.4 | 1908.4 | 1908.4 | 1908.4 |
| gdb 5339 | 1863.1 <sup>a</sup> | 1861.5 | 1838.9 | 1851.7 | 1868.0 | 1856.3 | 1850.3 | 1862.4 | 1862.4 | 1859.0 | 1859.0 | 1859.0 | 1859.0 |
| gdb 5340 | 1870.8 <sup>a</sup> | 1876.4 | 1857.2 | 1866.6 | 1870.2 | 1862.4 | 1859.1 | 1866.8 | 1866.8 | 1867.9 | 1867.9 | 1867.9 | 1867.9 |
| gdb 5341 | 1884.3 <sup>a</sup> | 1887.2 | 1875.5 | 1880.0 | 1885.0 | 1882.9 | 1875.1 | 1880.8 | 1880.8 | 1876.8 | 1876.8 | 1876.8 | 1876.8 |
| gdb 5342 | 1884.2 <sup>a</sup> | 1898.9 | 1887.9 | 1889.5 | 1892.1 | 1886.7 | 1881.5 | 1882.9 | 1882.9 | 1885.3 | 1885.3 | 1885.3 | 1885.3 |
| gdb 5343 | 1874.9 <sup>a</sup> | 1891.8 | 1878.6 | 1880.6 | 1888.4 | 1882.5 | 1874.9 | 1876.4 | 1876.4 | 1875.9 | 1875.9 | 1875.9 | 1875.9 |
| gdb 5344 | 1881.2 <sup>a</sup> | 1892.6 | 1881.3 | 1882.4 | 1885.4 | 1883.0 | 1878.7 | 1879.9 | 1879.9 | 1876.0 | 1876.0 | 1876.0 | 1876.0 |
| gdb 5345 | 1883.4 <sup>a</sup> | 1899.4 | 1891.2 | 1889.5 | 1892.0 | 1886.8 | 1884.2 | 1882.3 | 1882.3 | 1884.7 | 1884.7 | 1884.7 | 1884.7 |
| gdb 5346 | 1879.5 <sup>a</sup> | 1888.8 | 1881.3 | 1881.8 | 1891.4 | 1884.8 | 1873.1 | 1878.2 | 1878.2 | 1875.1 | 1875.1 | 1875.1 | 1875.1 |
| gdb 5347 | 1863.9 <sup>a</sup> | 1860.3 | 1840.6 | 1853.2 | 1867.7 | 1858.2 | 1849.3 | 1862.9 | 1862.9 | 1859.6 | 1859.6 | 1859.6 | 1859.6 |
| gdb 5348 | 1871.4 <sup>a</sup> | 1876.1 | 1857.6 | 1866.4 | 1870.6 | 1863.8 | 1859.8 | 1867.3 | 1867.3 | 1868.2 | 1868.2 | 1868.2 | 1868.2 |
| gdb 5349 | 1859.5 <sup>a</sup> | 1860.2 | 1842.5 | 1852.1 | 1863.9 | 1855.8 | 1850.2 | 1860.4 | 1860.4 | 1857.1 | 1857.1 | 1857.1 | 1857.1 |
| gdb 5350 | 1864.8 <sup>a</sup> | 1863.6 | 1846.2 | 1856.5 | 1867.0 | 1859.6 | 1853.1 | 1864.1 | 1864.1 | 1860.9 | 1860.8 | 1860.8 | 1860.8 |
| gdb 5351 | 1869.4 <sup>a</sup> | 1873.5 | 1859.1 | 1867.1 | 1868.7 | 1862.4 | 1860.7 | 1865.8 | 1865.8 | 1866.5 | 1866.5 | 1866.5 | 1866.5 |
| gdb 5352 | 1884.4 <sup>a</sup> | 1886.8 | 1875.5 | 1880.1 | 1885.2 | 1883.1 | 1875.2 | 1880.9 | 1880.9 | 1876.9 | 1876.9 | 1876.9 | 1876.9 |
| gdb 5353 | 1884.8 <sup>a</sup> | 1898.7 | 1888.3 | 1889.6 | 1893.1 | 1887.6 | 1882.0 | 1883.4 | 1883.4 | 1885.9 | 1885.9 | 1885.9 | 1885.9 |
| gdb 5354 | 1879.6 <sup>a</sup> | 1882.1 | 1873.7 | 1876.2 | 1880.0 | 1878.3 | 1873.6 | 1877.9 | 1877.9 | 1873.1 | 1873.1 | 1873.1 | 1873.1 |

... continued on next page ...

Table S26: ... continued from previous page. ...

| Molecule | Ref.                | MNDO   | AMI    | PM3    | PM6    | PM7    | OM1    |        | OM2    |        | OM3    |        | D3T    |
|----------|---------------------|--------|--------|--------|--------|--------|--------|--------|--------|--------|--------|--------|--------|
|          |                     |        |        |        |        |        | OM1    | OM2    | D2     | D3     | OM3    | D2     |        |
| gdb 5355 | 1881.2 <sup>a</sup> | 1883.5 | 1874.5 | 1877.7 | 1881.8 | 1880.6 | 1875.3 | 1880.2 | 1880.2 | 1880.2 | 1875.1 | 1875.1 | 1875.1 |
| gdb 5356 | 1885.1 <sup>a</sup> | 1896.6 | 1891.9 | 1888.9 | 1895.5 | 1890.6 | 1884.7 | 1887.3 | 1887.3 | 1887.3 | 1887.5 | 1887.4 | 1887.4 |
| gdb 5357 | 1875.0 <sup>a</sup> | 1893.3 | 1887.7 | 1883.0 | 1891.4 | 1885.8 | 1876.5 | 1876.4 | 1876.4 | 1876.4 | 1875.2 | 1875.2 | 1875.2 |
| gdb 5358 | 1881.9 <sup>a</sup> | 1893.1 | 1887.5 | 1882.7 | 1888.7 | 1886.3 | 1880.2 | 1879.6 | 1879.6 | 1879.6 | 1876.2 | 1876.2 | 1876.2 |
| gdb 5359 | 1886.0 <sup>a</sup> | 1886.6 | 1883.2 | 1884.8 | 1893.8 | 1887.7 | 1879.1 | 1895.5 | 1895.5 | 1895.5 | 1885.6 | 1885.6 | 1885.6 |
| gdb 5360 | 1885.8 <sup>a</sup> | 1886.4 | 1883.1 | 1884.8 | 1893.8 | 1887.6 | 1878.9 | 1895.4 | 1895.4 | 1895.4 | 1885.6 | 1885.6 | 1885.5 |
| gdb 5361 | 1888.2 <sup>a</sup> | 1889.3 | 1889.1 | 1887.1 | 1893.4 | 1888.7 | 1882.1 | 1891.4 | 1891.4 | 1891.4 | 1888.6 | 1888.6 | 1888.6 |
| gdb 5362 | 1890.3 <sup>a</sup> | 1892.8 | 1888.9 | 1888.8 | 1896.5 | 1892.1 | 1886.3 | 1895.4 | 1895.4 | 1895.4 | 1891.6 | 1891.6 | 1891.6 |
| gdb 5363 | 1888.0 <sup>a</sup> | 1889.9 | 1889.8 | 1887.5 | 1893.8 | 1889.5 | 1883.1 | 1892.2 | 1892.2 | 1892.2 | 1889.3 | 1889.3 | 1889.3 |
| gdb 5364 | 1882.2 <sup>a</sup> | 1904.0 | 1891.3 | 1892.5 | 1896.7 | 1889.8 | 1880.1 | 1880.4 | 1880.4 | 1880.4 | 1878.6 | 1878.6 | 1878.6 |
| gdb 5365 | 1881.3 <sup>a</sup> | 1903.6 | 1890.2 | 1891.8 | 1895.4 | 1888.4 | 1879.1 | 1879.4 | 1879.4 | 1879.4 | 1877.6 | 1877.5 | 1877.5 |
| gdb 5366 | 1882.5 <sup>a</sup> | 1900.9 | 1904.3 | 1892.7 | 1897.9 | 1894.3 | 1883.2 | 1882.7 | 1882.7 | 1882.7 | 1881.1 | 1881.1 | 1881.1 |
| gdb 5367 | 1907.3 <sup>a</sup> | 1917.6 | 1915.6 | 1917.4 | 1916.4 | 1915.2 | 1909.9 | 1915.3 | 1915.3 | 1915.3 | 1916.9 | 1916.9 | 1916.9 |
| gdb 5368 | 1908.0 <sup>a</sup> | 1918.9 | 1912.7 | 1915.0 | 1912.3 | 1912.8 | 1910.8 | 1914.7 | 1914.7 | 1914.7 | 1916.2 | 1916.2 | 1916.2 |
| gdb 5369 | 1914.5 <sup>a</sup> | 1920.2 | 1919.9 | 1921.2 | 1922.1 | 1919.1 | 1911.1 | 1915.5 | 1915.5 | 1915.5 | 1913.1 | 1913.1 | 1913.1 |
| gdb 5370 | 1909.0 <sup>a</sup> | 1921.3 | 1924.4 | 1919.1 | 1921.2 | 1919.8 | 1912.2 | 1915.0 | 1915.0 | 1915.0 | 1917.3 | 1917.3 | 1917.3 |
| gdb 5371 | 1911.5 <sup>a</sup> | 1919.3 | 1916.4 | 1916.8 | 1915.2 | 1914.3 | 1911.6 | 1916.0 | 1915.9 | 1915.9 | 1917.4 | 1917.4 | 1917.4 |
| gdb 5372 | 1913.2 <sup>a</sup> | 1919.8 | 1914.5 | 1915.9 | 1912.5 | 1913.2 | 1912.5 | 1916.2 | 1916.2 | 1916.2 | 1917.5 | 1917.5 | 1917.5 |
| gdb 5373 | 1900.1 <sup>a</sup> | 1915.1 | 1915.6 | 1913.6 | 1906.2 | 1906.4 | 1907.3 | 1906.1 | 1906.1 | 1906.1 | 1908.5 | 1908.5 | 1908.5 |
| gdb 5374 | 1883.6 <sup>a</sup> | 1887.4 | 1875.7 | 1880.3 | 1884.7 | 1882.9 | 1875.2 | 1880.9 | 1880.9 | 1880.9 | 1876.8 | 1876.8 | 1876.8 |
| gdb 5375 | 1884.8 <sup>a</sup> | 1898.9 | 1888.1 | 1889.3 | 1893.7 | 1887.9 | 1881.6 | 1883.3 | 1883.3 | 1883.3 | 1885.7 | 1885.7 | 1885.7 |
| gdb 5376 | 1880.7 <sup>a</sup> | 1893.0 | 1882.6 | 1883.9 | 1887.1 | 1884.6 | 1879.8 | 1881.6 | 1881.6 | 1881.6 | 1877.8 | 1877.8 | 1877.8 |
| gdb 5377 | 1882.9 <sup>a</sup> | 1899.5 | 1890.6 | 1889.4 | 1893.7 | 1886.9 | 1883.5 | 1882.0 | 1882.0 | 1882.0 | 1884.5 | 1884.4 | 1884.4 |
| gdb 5378 | 1884.0 <sup>a</sup> | 1886.0 | 1874.5 | 1879.9 | 1884.5 | 1882.3 | 1874.5 | 1880.6 | 1880.5 | 1880.5 | 1876.2 | 1876.2 | 1876.2 |
| gdb 5379 | 1885.2 <sup>a</sup> | 1899.2 | 1889.9 | 1889.3 | 1894.1 | 1889.1 | 1883.4 | 1884.5 | 1884.5 | 1884.5 | 1886.7 | 1886.7 | 1886.7 |
| gdb 5380 | 1879.6 <sup>a</sup> | 1889.8 | 1882.1 | 1882.3 | 1891.8 | 1885.3 | 1874.1 | 1879.0 | 1879.0 | 1879.0 | 1875.8 | 1875.8 | 1875.8 |
| gdb 5381 | 1885.9 <sup>a</sup> | 1895.3 | 1889.8 | 1885.1 | 1890.4 | 1887.8 | 1882.2 | 1880.4 | 1880.4 | 1880.4 | 1877.7 | 1877.7 | 1877.7 |
| gdb 5382 | 1881.8 <sup>a</sup> | 1903.9 | 1891.1 | 1892.0 | 1895.9 | 1889.6 | 1880.8 | 1880.7 | 1880.7 | 1880.7 | 1878.8 | 1878.8 | 1878.8 |
| gdb 5383 | 1882.3 <sup>a</sup> | 1904.3 | 1891.3 | 1892.6 | 1896.7 | 1889.8 | 1880.1 | 1880.3 | 1880.3 | 1880.3 | 1878.6 | 1878.5 | 1878.5 |
| gdb 5384 | 1915.0 <sup>a</sup> | 1920.1 | 1919.9 | 1921.3 | 1922.9 | 1919.3 | 1910.9 | 1915.5 | 1915.5 | 1915.5 | 1913.2 | 1913.2 | 1913.2 |
| gdb 5385 | 1908.9 <sup>a</sup> | 1921.1 | 1924.2 | 1919.0 | 1920.9 | 1919.5 | 1912.1 | 1914.6 | 1914.6 | 1914.6 | 1917.0 | 1917.0 | 1917.0 |
| gdb 5386 | 1881.0 <sup>a</sup> | 1891.1 | 1878.2 | 1879.1 | 1882.4 | 1880.2 | 1878.7 | 1879.2 | 1879.2 | 1879.2 | 1874.8 | 1874.8 | 1874.8 |
| gdb 5387 | 1875.2 <sup>a</sup> | 1889.4 | 1877.5 | 1879.7 | 1887.7 | 1882.1 | 1874.1 | 1876.6 | 1876.6 | 1876.6 | 1875.8 | 1875.8 | 1875.8 |
| gdb 5388 | 1893.8 <sup>a</sup> | 1904.3 | 1900.7 | 1902.7 | 1900.3 | 1900.4 | 1899.0 | 1903.1 | 1903.1 | 1903.1 | 1901.4 | 1901.3 | 1901.3 |
| gdb 5389 | 1900.4 <sup>a</sup> | 1914.6 | 1915.3 | 1912.2 | 1907.1 | 1907.0 | 1908.4 | 1906.1 | 1906.4 | 1906.4 | 1908.0 | 1908.0 | 1908.0 |
| gdb 5390 | 1881.4 <sup>a</sup> | 1894.2 | 1887.9 | 1882.7 | 1888.4 | 1886.7 | 1881.2 | 1880.2 | 1880.1 | 1880.1 | 1876.6 | 1876.6 | 1876.6 |
| gdb 5391 | 1874.5 <sup>a</sup> | 1893.8 | 1887.6 | 1883.0 | 1893.4 | 1885.7 | 1876.2 | 1876.1 | 1876.1 | 1876.1 | 1875.1 | 1875.1 | 1875.1 |
| gdb 5392 | 1918.4 <sup>a</sup> | 1919.0 | 1918.3 | 1919.0 | 1919.6 | 1917.2 | 1910.4 | 1915.2 | 1915.1 | 1915.1 | 1912.0 | 1911.9 | 1911.9 |
| gdb 5393 | 1901.7 <sup>a</sup> | 1909.3 | 1909.6 | 1907.7 | 1908.3 | 1908.2 | 1899.3 | 1906.3 | 1906.3 | 1906.3 | 1904.0 | 1904.0 | 1904.0 |
| gdb 5394 | 1913.0 <sup>a</sup> | 1921.9 | 1924.6 | 1918.4 | 1919.3 | 1919.1 | 1913.6 | 1916.7 | 1916.7 | 1916.7 | 1917.5 | 1917.5 | 1917.5 |
| gdb 5395 | 1881.7 <sup>a</sup> | 1900.4 | 1903.5 | 1892.2 | 1897.0 | 1893.4 | 1881.9 | 1881.8 | 1881.8 | 1881.8 | 1880.1 | 1880.1 | 1880.1 |
| gdb 5396 | 1882.1 <sup>a</sup> | 1886.9 | 1870.7 | 1880.6 | 1887.9 | 1879.0 | 1873.0 | 1876.9 | 1876.9 | 1876.9 | 1880.0 | 1880.0 | 1880.0 |
| gdb 5397 | 1880.2 <sup>a</sup> | 1885.5 | 1864.9 | 1877.7 | 1882.6 | 1874.8 | 1873.6 | 1875.8 | 1875.8 | 1875.8 | 1880.0 | 1880.0 | 1880.0 |
| gdb 5398 | 1876.1 <sup>a</sup> | 1872.5 | 1850.6 | 1867.6 | 1872.3 | 1868.6 | 1864.4 | 1871.6 | 1871.5 | 1871.5 | 1868.9 | 1868.9 | 1868.9 |
| gdb 5399 | 1872.4 <sup>a</sup> | 1876.7 | 1856.2 | 1869.3 | 1874.4 | 1866.6 | 1863.0 | 1869.4 | 1869.4 | 1869.4 | 1868.4 | 1868.4 | 1868.4 |

... continued on next page ...

Table S26: . . . continued from previous page. . . .

| Molecule | Ref.                | MNDO   | AMI    | PM3    | PM6    | PM7    | OM1    | OM2    |        | OM3    |        | D3T    | OM3    | D3     | D3T    |
|----------|---------------------|--------|--------|--------|--------|--------|--------|--------|--------|--------|--------|--------|--------|--------|--------|
|          |                     |        |        |        |        |        |        | D2     | D3     | D2     | D3     |        |        |        |        |
| gdb 5400 | 1875.9 <sup>a</sup> | 1886.7 | 1865.0 | 1878.4 | 1883.1 | 1878.7 | 1875.1 | 1877.9 | 1877.9 | 1877.9 | 1877.9 | 1877.9 | 1875.4 | 1875.4 | 1875.4 |
| gdb 5401 | 1893.6 <sup>a</sup> | 1891.8 | 1866.7 | 1883.3 | 1892.6 | 1884.2 | 1878.5 | 1878.6 | 1878.6 | 1878.6 | 1878.6 | 1878.6 | 1879.3 | 1879.3 | 1879.3 |
| gdb 5402 | 1866.0 <sup>a</sup> | 1886.9 | 1864.8 | 1877.1 | 1883.4 | 1874.3 | 1871.4 | 1873.3 | 1873.3 | 1873.3 | 1873.3 | 1873.3 | 1872.0 | 1871.9 | 1871.9 |
| gdb 5403 | 1878.7 <sup>a</sup> | 1897.7 | 1880.6 | 1889.3 | 1896.8 | 1888.4 | 1882.8 | 1883.2 | 1883.2 | 1883.2 | 1883.2 | 1883.2 | 1885.8 | 1885.8 | 1885.8 |
| gdb 5404 | 1910.6 <sup>a</sup> | 1917.8 | 1918.9 | 1918.9 | 1919.9 | 1919.2 | 1911.9 | 1917.7 | 1917.7 | 1917.7 | 1917.7 | 1917.7 | 1919.0 | 1919.0 | 1919.0 |
| gdb 5405 | 1897.1 <sup>a</sup> | 1905.2 | 1901.7 | 1906.2 | 1905.8 | 1904.8 | 1895.0 | 1904.6 | 1904.6 | 1904.6 | 1904.6 | 1904.6 | 1902.7 | 1902.6 | 1902.6 |
| gdb 5406 | 1920.9 <sup>a</sup> | 1925.7 | 1925.6 | 1929.5 | 1929.7 | 1930.2 | 1929.0 | 1934.8 | 1934.8 | 1934.8 | 1934.8 | 1934.8 | 1937.8 | 1937.8 | 1937.8 |
| gdb 5407 | 1857.5 <sup>a</sup> | 1867.2 | 1864.1 | 1863.8 | 1865.3 | 1858.9 | 1851.2 | 1852.4 | 1852.3 | 1852.3 | 1852.3 | 1852.3 | 1854.3 | 1854.3 | 1854.3 |
| gdb 5408 | 1848.1 <sup>a</sup> | 1856.6 | 1849.6 | 1852.2 | 1853.2 | 1847.7 | 1839.8 | 1842.9 | 1842.9 | 1842.9 | 1842.9 | 1842.9 | 1841.7 | 1841.7 | 1841.7 |
| gdb 5409 | 1855.2 <sup>a</sup> | 1867.2 | 1862.9 | 1863.4 | 1861.2 | 1855.6 | 1850.4 | 1851.4 | 1851.4 | 1851.4 | 1851.4 | 1851.4 | 1852.9 | 1852.8 | 1852.8 |
| gdb 5410 | 1856.4 <sup>a</sup> | 1867.5 | 1861.0 | 1861.0 | 1860.8 | 1855.4 | 1849.9 | 1851.6 | 1851.6 | 1851.6 | 1851.6 | 1851.6 | 1853.0 | 1852.9 | 1852.9 |
| gdb 5411 | 1854.2 <sup>a</sup> | 1868.1 | 1860.1 | 1862.4 | 1859.0 | 1854.8 | 1851.0 | 1850.4 | 1850.4 | 1850.4 | 1850.4 | 1850.4 | 1852.5 | 1852.4 | 1852.4 |
| gdb 5412 | 1844.6 <sup>a</sup> | 1856.1 | 1846.0 | 1849.2 | 1848.7 | 1844.2 | 1837.0 | 1840.1 | 1840.0 | 1840.0 | 1840.0 | 1840.0 | 1838.9 | 1838.8 | 1838.8 |
| gdb 5413 | 1845.5 <sup>a</sup> | 1856.2 | 1850.0 | 1851.9 | 1851.1 | 1845.5 | 1837.9 | 1840.9 | 1840.9 | 1840.9 | 1840.9 | 1840.9 | 1839.4 | 1839.4 | 1839.4 |
| gdb 5414 | 1858.2 <sup>a</sup> | 1882.1 | 1872.0 | 1866.4 | 1866.6 | 1861.4 | 1858.9 | 1855.0 | 1855.0 | 1855.0 | 1855.0 | 1855.0 | 1858.4 | 1858.4 | 1858.4 |
| gdb 5415 | 1847.2 <sup>a</sup> | 1870.1 | 1858.2 | 1857.0 | 1856.4 | 1851.0 | 1844.4 | 1843.3 | 1843.3 | 1843.3 | 1843.3 | 1843.3 | 1843.7 | 1843.6 | 1843.6 |
| gdb 5416 | 1842.9 <sup>a</sup> | 1858.4 | 1852.5 | 1852.2 | 1849.9 | 1844.2 | 1842.9 | 1840.0 | 1840.0 | 1840.0 | 1840.0 | 1840.0 | 1839.8 | 1839.7 | 1839.7 |
| gdb 5417 | 1852.9 <sup>a</sup> | 1869.6 | 1866.7 | 1863.6 | 1861.3 | 1854.9 | 1855.1 | 1850.0 | 1849.9 | 1849.9 | 1849.9 | 1849.9 | 1852.6 | 1852.5 | 1852.5 |
| gdb 5418 | 1912.1 <sup>a</sup> | 1911.5 | 1915.2 | 1914.0 | 1913.8 | 1913.0 | 1910.0 | 1914.9 | 1914.9 | 1914.9 | 1914.9 | 1914.9 | 1915.8 | 1915.8 | 1915.8 |
| gdb 5419 | 1910.2 <sup>a</sup> | 1910.6 | 1911.0 | 1912.1 | 1910.7 | 1910.3 | 1909.9 | 1913.8 | 1913.8 | 1913.8 | 1913.8 | 1913.8 | 1914.8 | 1914.8 | 1914.8 |
| gdb 5420 | 1897.2 <sup>a</sup> | 1898.1 | 1898.9 | 1902.0 | 1900.9 | 1899.5 | 1897.1 | 1902.0 | 1902.0 | 1902.0 | 1902.0 | 1902.0 | 1899.4 | 1899.3 | 1899.3 |
| gdb 5421 | 1852.6 <sup>a</sup> | 1869.1 | 1860.6 | 1863.1 | 1863.7 | 1856.8 | 1848.7 | 1850.3 | 1850.3 | 1850.3 | 1850.3 | 1850.3 | 1848.0 | 1847.9 | 1847.9 |
| gdb 5422 | 1845.1 <sup>a</sup> | 1859.4 | 1848.6 | 1853.0 | 1854.1 | 1847.7 | 1839.2 | 1844.4 | 1844.3 | 1844.3 | 1844.3 | 1844.3 | 1837.5 | 1837.5 | 1837.5 |
| gdb 5423 | 1851.7 <sup>a</sup> | 1872.0 | 1867.8 | 1867.3 | 1866.2 | 1859.8 | 1851.6 | 1855.3 | 1855.3 | 1855.3 | 1855.3 | 1855.3 | 1851.2 | 1851.2 | 1851.2 |
| gdb 5424 | 1859.1 <sup>a</sup> | 1881.6 | 1877.6 | 1875.0 | 1872.2 | 1866.2 | 1861.8 | 1860.7 | 1860.7 | 1860.7 | 1860.7 | 1860.7 | 1860.8 | 1860.8 | 1860.8 |
| gdb 5425 | 1892.4 <sup>a</sup> | 1895.7 | 1891.7 | 1897.2 | 1889.3 | 1890.2 | 1899.2 | 1896.3 | 1896.3 | 1896.3 | 1896.3 | 1896.3 | 1899.9 | 1899.9 | 1899.9 |
| gdb 5426 | 1843.7 <sup>a</sup> | 1858.2 | 1854.8 | 1850.4 | 1852.4 | 1846.1 | 1841.5 | 1840.1 | 1840.0 | 1840.0 | 1840.0 | 1840.0 | 1839.1 | 1839.1 | 1839.1 |
| gdb 5427 | 1831.7 <sup>a</sup> | 1846.5 | 1839.7 | 1838.4 | 1838.7 | 1832.9 | 1827.0 | 1828.4 | 1828.4 | 1828.4 | 1828.4 | 1828.4 | 1824.1 | 1824.1 | 1824.1 |
| gdb 5428 | 1855.4 <sup>a</sup> | 1869.9 | 1869.0 | 1862.2 | 1863.0 | 1856.2 | 1853.3 | 1850.7 | 1850.7 | 1850.7 | 1850.7 | 1850.7 | 1852.3 | 1852.2 | 1852.2 |
| gdb 5429 | 1898.6 <sup>a</sup> | 1909.3 | 1901.5 | 1910.8 | 1905.4 | 1904.1 | 1904.4 | 1905.1 | 1905.1 | 1905.1 | 1905.1 | 1905.1 | 1908.4 | 1908.4 | 1908.4 |
| gdb 5430 | 1881.8 <sup>a</sup> | 1887.1 | 1871.1 | 1881.3 | 1888.2 | 1878.4 | 1871.7 | 1875.5 | 1875.4 | 1875.5 | 1875.5 | 1875.5 | 1879.0 | 1879.0 | 1879.0 |
| gdb 5431 | 1880.4 <sup>a</sup> | 1886.7 | 1867.1 | 1880.4 | 1884.6 | 1876.1 | 1872.6 | 1874.2 | 1874.2 | 1874.2 | 1874.2 | 1874.2 | 1879.0 | 1879.0 | 1879.0 |
| gdb 5432 | 1892.1 <sup>a</sup> | 1877.6 | 1854.9 | 1872.7 | 1883.7 | 1874.3 | 1864.7 | 1868.2 | 1868.1 | 1868.1 | 1868.1 | 1868.1 | 1869.4 | 1869.4 | 1869.4 |
| gdb 5433 | 1871.4 <sup>a</sup> | 1875.9 | 1856.3 | 1869.7 | 1876.4 | 1867.3 | 1859.9 | 1864.9 | 1864.8 | 1864.8 | 1864.8 | 1864.8 | 1865.7 | 1865.6 | 1865.6 |
| gdb 5434 | 1868.0 <sup>a</sup> | 1855.8 | 1831.6 | 1846.6 | 1858.5 | 1844.9 | 1845.1 | 1849.3 | 1849.3 | 1849.3 | 1849.3 | 1849.3 | 1854.0 | 1854.0 | 1854.0 |
| gdb 5435 | 1870.2 <sup>a</sup> | 1857.6 | 1829.1 | 1849.3 | 1858.7 | 1844.9 | 1848.2 | 1850.0 | 1849.9 | 1849.9 | 1849.9 | 1849.9 | 1854.7 | 1854.6 | 1854.6 |
| gdb 5436 | 1861.1 <sup>a</sup> | 1846.4 | 1818.0 | 1836.6 | 1848.7 | 1836.1 | 1835.8 | 1841.5 | 1841.4 | 1841.5 | 1841.5 | 1841.5 | 1842.6 | 1842.6 | 1842.6 |
| gdb 5437 | 1880.5 <sup>a</sup> | 1885.8 | 1870.8 | 1879.2 | 1884.9 | 1876.4 | 1874.1 | 1875.4 | 1875.4 | 1875.4 | 1875.4 | 1875.4 | 1878.7 | 1878.7 | 1878.7 |
| gdb 5438 | 1880.1 <sup>a</sup> | 1884.7 | 1868.5 | 1879.2 | 1883.0 | 1874.2 | 1874.6 | 1873.7 | 1873.6 | 1873.6 | 1873.6 | 1873.6 | 1877.7 | 1877.7 | 1877.7 |
| gdb 5439 | 1870.7 <sup>a</sup> | 1875.3 | 1856.5 | 1867.8 | 1873.0 | 1865.3 | 1863.7 | 1867.8 | 1867.8 | 1867.8 | 1867.8 | 1867.8 | 1867.1 | 1867.1 | 1867.1 |
| gdb 5440 | 1880.7 <sup>a</sup> | 1885.9 | 1871.0 | 1879.4 | 1885.0 | 1876.5 | 1874.9 | 1876.4 | 1876.4 | 1876.4 | 1876.4 | 1876.4 | 1879.8 | 1879.8 | 1879.8 |
| gdb 5441 | 1879.9 <sup>a</sup> | 1886.8 | 1867.6 | 1877.9 | 1880.6 | 1874.1 | 1876.3 | 1876.5 | 1876.5 | 1876.5 | 1876.5 | 1876.5 | 1879.2 | 1879.2 | 1879.2 |
| gdb 5442 | 1870.1 <sup>a</sup> | 1874.2 | 1856.3 | 1868.1 | 1874.1 | 1865.7 | 1862.2 | 1865.9 | 1865.9 | 1865.9 | 1865.9 | 1865.9 | 1866.2 | 1866.2 | 1866.2 |
| gdb 5443 | 1846.9 <sup>a</sup> | 1837.9 | 1822.1 | 1831.9 | 1849.6 | 1838.3 | 1831.7 | 1840.0 | 1840.0 | 1840.0 | 1840.0 | 1840.0 | 1835.2 | 1835.2 | 1835.2 |
| gdb 5444 | 1857.2 <sup>a</sup> | 1849.3 | 1836.3 | 1842.8 | 1859.5 | 1848.0 | 1843.6 | 1850.1 | 1850.1 | 1850.1 | 1850.1 | 1850.1 | 1848.3 | 1848.3 | 1848.3 |

. . . continued on next page. . . .

Table S26: ... continued from previous page. ...

| Molecule | Ref.                | MNDO   | AMI    | PM3    | PM6    | PM7    | OM1    |        | OM2    |        | OM3    |        | OM3    |        | D3T    |
|----------|---------------------|--------|--------|--------|--------|--------|--------|--------|--------|--------|--------|--------|--------|--------|--------|
|          |                     |        |        |        |        |        | D2     | D3     | D2     | D3     | D2     | D3     | D2     | D3     |        |
| gdb 5445 | 1833.5 <sup>a</sup> | 1849.9 | 1826.0 | 1836.7 | 1849.8 | 1837.2 | 1824.6 | 1825.6 | 1825.6 | 1825.6 | 1821.7 | 1821.7 | 1821.7 | 1821.7 | 1821.7 |
| gdb 5446 | 1844.6 <sup>a</sup> | 1861.5 | 1840.5 | 1848.0 | 1860.2 | 1847.5 | 1837.0 | 1836.1 | 1836.1 | 1836.1 | 1835.2 | 1835.1 | 1835.1 | 1835.1 | 1835.1 |
| gdb 5447 | 1833.6 <sup>a</sup> | 1832.5 | 1794.1 | 1812.8 | 1826.7 | 1808.6 | 1807.0 | 1808.9 | 1808.9 | 1808.9 | 1809.5 | 1809.4 | 1809.4 | 1809.4 | 1809.4 |
| gdb 5448 | 1839.8 <sup>a</sup> | 1842.7 | 1807.8 | 1823.4 | 1837.1 | 1818.0 | 1816.5 | 1815.9 | 1815.9 | 1815.9 | 1820.4 | 1820.4 | 1820.4 | 1820.4 | 1820.4 |
| gdb 5449 | 1847.3 <sup>a</sup> | 1850.6 | 1819.2 | 1836.4 | 1852.4 | 1838.2 | 1825.7 | 1829.9 | 1829.9 | 1829.9 | 1831.0 | 1830.9 | 1830.9 | 1830.9 | 1830.9 |
| gdb 5450 | 1845.1 <sup>a</sup> | 1853.0 | 1821.0 | 1838.5 | 1845.1 | 1832.2 | 1826.3 | 1829.7 | 1829.7 | 1829.7 | 1829.7 | 1829.6 | 1829.6 | 1829.6 | 1829.6 |
| gdb 5451 | 1837.6 <sup>a</sup> | 1839.4 | 1805.1 | 1825.7 | 1840.7 | 1827.0 | 1813.3 | 1820.7 | 1820.7 | 1820.7 | 1818.0 | 1817.9 | 1817.9 | 1817.9 | 1817.9 |
| gdb 5452 | 1854.4 <sup>a</sup> | 1864.0 | 1833.1 | 1847.4 | 1853.8 | 1840.7 | 1838.1 | 1837.8 | 1837.8 | 1837.8 | 1841.0 | 1841.0 | 1841.0 | 1841.0 | 1841.0 |
| gdb 5453 | 1848.7 <sup>a</sup> | 1850.6 | 1826.6 | 1839.3 | 1851.1 | 1838.4 | 1832.3 | 1836.4 | 1836.4 | 1836.4 | 1834.9 | 1834.9 | 1834.8 | 1834.8 | 1834.8 |
| gdb 5454 | 1854.2 <sup>a</sup> | 1861.1 | 1839.9 | 1850.8 | 1860.1 | 1847.2 | 1840.9 | 1842.4 | 1842.4 | 1842.4 | 1845.1 | 1845.1 | 1845.1 | 1845.1 | 1845.1 |
| gdb 5455 | 1848.9 <sup>a</sup> | 1848.9 | 1819.3 | 1837.0 | 1853.6 | 1839.2 | 1827.9 | 1832.7 | 1832.7 | 1832.7 | 1833.1 | 1833.0 | 1833.1 | 1833.1 | 1833.1 |
| gdb 5456 | 1850.6 <sup>a</sup> | 1854.9 | 1824.6 | 1840.9 | 1849.1 | 1836.6 | 1833.6 | 1837.9 | 1837.9 | 1837.9 | 1836.2 | 1836.2 | 1836.2 | 1836.2 | 1836.2 |
| gdb 5457 | 1839.2 <sup>a</sup> | 1837.6 | 1804.9 | 1825.7 | 1841.7 | 1828.1 | 1815.8 | 1824.5 | 1824.5 | 1824.5 | 1820.9 | 1820.9 | 1820.9 | 1820.9 | 1820.9 |
| gdb 5458 | 1856.3 <sup>a</sup> | 1863.6 | 1836.0 | 1850.4 | 1858.7 | 1845.3 | 1841.2 | 1843.1 | 1843.1 | 1843.1 | 1845.6 | 1845.5 | 1845.6 | 1845.6 | 1845.6 |
| gdb 5459 | 1844.3 <sup>a</sup> | 1852.4 | 1820.7 | 1837.3 | 1850.4 | 1836.2 | 1823.9 | 1828.2 | 1828.2 | 1828.2 | 1828.8 | 1828.8 | 1828.8 | 1828.8 | 1828.8 |
| gdb 5460 | 1843.0 <sup>a</sup> | 1850.9 | 1815.8 | 1835.6 | 1844.0 | 1830.5 | 1823.0 | 1827.1 | 1827.1 | 1827.1 | 1828.0 | 1828.0 | 1828.0 | 1828.0 | 1828.0 |
| gdb 5461 | 1843.8 <sup>a</sup> | 1854.1 | 1821.4 | 1838.7 | 1845.3 | 1832.2 | 1826.6 | 1829.6 | 1829.6 | 1829.5 | 1829.7 | 1829.7 | 1829.7 | 1829.7 | 1829.7 |
| gdb 5462 | 1835.2 <sup>a</sup> | 1841.5 | 1806.6 | 1826.1 | 1840.0 | 1826.1 | 1812.7 | 1819.4 | 1819.4 | 1819.4 | 1816.3 | 1816.3 | 1816.3 | 1816.3 | 1816.3 |
| gdb 5463 | 1852.2 <sup>a</sup> | 1864.4 | 1834.8 | 1849.1 | 1854.1 | 1841.4 | 1836.4 | 1836.6 | 1836.6 | 1836.6 | 1840.6 | 1840.6 | 1840.6 | 1840.6 | 1840.6 |
| gdb 5464 | 1833.5 <sup>a</sup> | 1874.3 | 1867.6 | 1873.5 | 1884.1 | 1874.8 | 1863.6 | 1876.2 | 1876.2 | 1876.2 | 1869.9 | 1869.9 | 1869.9 | 1869.9 | 1869.9 |
| gdb 5465 | 1878.5 <sup>a</sup> | 1870.7 | 1861.9 | 1867.6 | 1875.4 | 1868.4 | 1860.5 | 1869.5 | 1869.5 | 1869.5 | 1864.8 | 1864.8 | 1864.8 | 1864.8 | 1864.8 |
| gdb 5466 | 1888.0 <sup>a</sup> | 1881.1 | 1876.3 | 1878.7 | 1887.7 | 1879.8 | 1872.9 | 1879.2 | 1879.2 | 1879.2 | 1878.3 | 1878.3 | 1878.3 | 1878.3 | 1878.3 |
| gdb 5467 | 1833.5 <sup>a</sup> | 1833.2 | 1790.6 | 1812.2 | 1830.9 | 1811.5 | 1804.7 | 1808.9 | 1808.9 | 1808.9 | 1810.2 | 1810.2 | 1810.2 | 1810.2 | 1810.2 |
| gdb 5468 | 1838.2 <sup>a</sup> | 1836.7 | 1792.8 | 1814.0 | 1828.0 | 1809.3 | 1809.0 | 1811.6 | 1811.6 | 1811.6 | 1812.0 | 1811.9 | 1811.9 | 1811.9 | 1811.9 |
| gdb 5469 | 1826.7 <sup>a</sup> | 1822.5 | 1776.6 | 1801.1 | 1820.9 | 1802.1 | 1794.9 | 1801.5 | 1801.5 | 1801.5 | 1799.1 | 1799.1 | 1799.1 | 1799.1 | 1799.1 |
| gdb 5470 | 1842.5 <sup>a</sup> | 1845.4 | 1804.2 | 1822.5 | 1836.0 | 1816.3 | 1816.4 | 1817.1 | 1817.1 | 1817.1 | 1821.2 | 1821.2 | 1821.2 | 1821.2 | 1821.2 |
| gdb 5471 | 1831.2 <sup>a</sup> | 1833.2 | 1791.4 | 1811.9 | 1829.9 | 1810.2 | 1804.0 | 1807.8 | 1807.8 | 1807.8 | 1808.7 | 1808.7 | 1808.7 | 1808.7 | 1808.7 |
| gdb 5472 | 1832.5 <sup>a</sup> | 1834.3 | 1787.3 | 1811.3 | 1823.7 | 1805.6 | 1804.5 | 1807.8 | 1807.8 | 1807.8 | 1807.9 | 1807.8 | 1807.8 | 1807.8 | 1807.8 |
| gdb 5473 | 1835.6 <sup>a</sup> | 1835.6 | 1789.9 | 1811.7 | 1823.6 | 1805.3 | 1806.8 | 1809.7 | 1809.7 | 1809.7 | 1809.9 | 1809.8 | 1809.8 | 1809.8 | 1809.8 |
| gdb 5474 | 1824.1 <sup>a</sup> | 1823.0 | 1777.5 | 1801.3 | 1819.0 | 1800.4 | 1794.4 | 1800.2 | 1800.2 | 1800.2 | 1797.3 | 1797.2 | 1797.2 | 1797.2 | 1797.2 |
| gdb 5475 | 1843.9 <sup>a</sup> | 1846.4 | 1804.5 | 1823.4 | 1836.0 | 1817.2 | 1818.0 | 1817.8 | 1817.8 | 1817.8 | 1822.0 | 1821.9 | 1822.0 | 1822.0 | 1822.0 |
| gdb 5476 | 1838.9 <sup>a</sup> | 1840.6 | 1819.2 | 1829.6 | 1844.5 | 1835.6 | 1826.6 | 1829.9 | 1829.9 | 1829.9 | 1827.4 | 1827.4 | 1827.4 | 1827.4 | 1827.4 |
| gdb 5477 | 1826.8 <sup>a</sup> | 1840.8 | 1817.2 | 1829.4 | 1840.1 | 1827.6 | 1817.8 | 1818.5 | 1818.5 | 1818.5 | 1819.7 | 1819.7 | 1819.7 | 1819.7 | 1819.7 |
| gdb 5478 | 1827.9 <sup>a</sup> | 1829.4 | 1804.8 | 1818.6 | 1834.0 | 1825.3 | 1814.5 | 1819.5 | 1819.5 | 1819.5 | 1813.9 | 1813.9 | 1813.9 | 1813.9 | 1813.9 |
| gdb 5479 | 1836.9 <sup>a</sup> | 1852.1 | 1829.5 | 1838.5 | 1850.9 | 1835.6 | 1830.2 | 1827.7 | 1827.7 | 1827.7 | 1831.5 | 1831.5 | 1831.5 | 1831.5 | 1831.5 |
| gdb 5480 | 1834.2 <sup>a</sup> | 1838.0 | 1816.7 | 1826.4 | 1842.8 | 1830.7 | 1823.7 | 1825.8 | 1825.8 | 1825.8 | 1822.3 | 1822.3 | 1822.3 | 1822.3 | 1822.3 |
| gdb 5481 | 1834.3 <sup>a</sup> | 1839.1 | 1814.9 | 1828.1 | 1838.3 | 1830.6 | 1825.0 | 1826.5 | 1826.5 | 1826.5 | 1824.5 | 1824.5 | 1824.5 | 1824.5 | 1824.5 |
| gdb 5482 | 1825.8 <sup>a</sup> | 1840.8 | 1816.8 | 1828.4 | 1839.0 | 1827.0 | 1817.5 | 1816.7 | 1816.7 | 1816.6 | 1817.4 | 1817.4 | 1817.4 | 1817.4 | 1817.4 |
| gdb 5483 | 1824.8 <sup>a</sup> | 1827.8 | 1804.9 | 1817.6 | 1831.9 | 1823.3 | 1813.0 | 1817.3 | 1817.3 | 1817.3 | 1811.4 | 1811.3 | 1811.3 | 1811.3 | 1811.3 |
| gdb 5484 | 1838.3 <sup>a</sup> | 1851.8 | 1829.3 | 1837.9 | 1849.2 | 1838.0 | 1832.4 | 1829.8 | 1829.8 | 1829.8 | 1833.4 | 1833.4 | 1833.4 | 1833.4 | 1833.4 |
| gdb 5485 | 1861.1 <sup>a</sup> | 1866.1 | 1850.3 | 1855.6 | 1865.7 | 1855.9 | 1851.1 | 1857.3 | 1857.3 | 1857.3 | 1851.8 | 1851.8 | 1851.8 | 1851.8 | 1851.8 |
| gdb 5486 | 1859.8 <sup>a</sup> | 1864.6 | 1848.7 | 1854.5 | 1867.3 | 1854.8 | 1847.6 | 1853.1 | 1852.9 | 1853.0 | 1848.5 | 1848.2 | 1848.3 | 1848.4 | 1848.4 |
| gdb 5487 | 1868.5 <sup>a</sup> | 1875.9 | 1863.9 | 1867.4 | 1878.3 | 1867.7 | 1861.9 | 1865.0 | 1865.0 | 1865.0 | 1863.4 | 1863.4 | 1863.4 | 1863.4 | 1863.4 |
| gdb 5488 | 1866.9 <sup>a</sup> | 1875.1 | 1861.3 | 1865.0 | 1873.8 | 1863.4 | 1858.6 | 1860.5 | 1860.5 | 1860.5 | 1859.5 | 1859.5 | 1859.5 | 1859.5 | 1859.5 |
| gdb 5489 | 1853.0 <sup>a</sup> | 1845.9 | 1817.4 | 1830.6 | 1845.3 | 1830.4 | 1828.5 | 1835.3 | 1835.3 | 1835.3 | 1831.7 | 1831.7 | 1831.7 | 1831.7 | 1831.7 |

... continued on next page ...



Table S26: ... continued from previous page ...

| Molecule | Ref.                | MNDO   | AMI    | PM3    | PM6    | PM7    | OM1    |        | OM2    |        | OM3    |        | OM3    | D3     | D3T    |
|----------|---------------------|--------|--------|--------|--------|--------|--------|--------|--------|--------|--------|--------|--------|--------|--------|
|          |                     |        |        |        |        |        | D2     | D3     | D2     | D3     | D2     | D3     |        |        |        |
| gdb 5535 | 1834.9 <sup>a</sup> | 1829.2 | 1795.0 | 1811.6 | 1825.0 | 1812.2 | 1811.8 | 1813.3 | 1813.2 | 1813.2 | 1813.2 | 1812.4 | 1812.4 | 1812.4 | 1812.4 |
| gdb 5536 | 1822.8 <sup>a</sup> | 1824.2 | 1792.9 | 1808.3 | 1830.3 | 1812.3 | 1810.1 | 1813.4 | 1813.3 | 1813.3 | 1813.3 | 1812.9 | 1812.8 | 1812.8 | 1812.8 |
| gdb 5537 | 1846.6 <sup>a</sup> | 1838.6 | 1816.9 | 1832.1 | 1842.0 | 1831.7 | 1834.5 | 1838.4 | 1838.4 | 1838.4 | 1838.4 | 1837.9 | 1837.9 | 1837.9 | 1837.9 |
| gdb 5538 | 1851.6 <sup>a</sup> | 1842.4 | 1819.2 | 1842.3 | 1840.4 | 1831.0 | 1836.1 | 1837.7 | 1837.7 | 1837.7 | 1837.7 | 1838.3 | 1838.2 | 1838.2 | 1838.2 |
| gdb 5539 | 1853.7 <sup>a</sup> | 1849.4 | 1831.1 | 1841.1 | 1847.6 | 1837.1 | 1841.5 | 1842.3 | 1842.3 | 1842.3 | 1842.3 | 1846.8 | 1846.7 | 1846.7 | 1846.7 |
| gdb 5540 | 1868.7 <sup>a</sup> | 1875.5 | 1867.0 | 1868.9 | 1877.0 | 1871.6 | 1861.2 | 1867.8 | 1867.8 | 1867.8 | 1867.8 | 1860.6 | 1860.6 | 1860.6 | 1860.6 |
| gdb 5541 | 1878.3 <sup>a</sup> | 1885.6 | 1880.0 | 1879.3 | 1888.6 | 1882.1 | 1872.6 | 1876.1 | 1876.1 | 1876.1 | 1876.1 | 1873.1 | 1873.1 | 1873.1 | 1873.1 |
| gdb 5542 | 1882.6 <sup>a</sup> | 1888.0 | 1868.6 | 1878.4 | 1885.7 | 1875.5 | 1875.0 | 1877.1 | 1877.1 | 1877.1 | 1877.1 | 1879.6 | 1879.6 | 1879.6 | 1879.6 |
| gdb 5543 | 1882.3 <sup>a</sup> | 1887.0 | 1865.5 | 1878.8 | 1879.2 | 1872.7 | 1873.6 | 1875.6 | 1875.6 | 1875.6 | 1875.6 | 1879.4 | 1879.4 | 1879.4 | 1879.4 |
| gdb 5544 | 1876.5 <sup>a</sup> | 1873.7 | 1851.1 | 1867.9 | 1872.1 | 1868.7 | 1865.6 | 1872.2 | 1872.1 | 1872.1 | 1872.1 | 1869.4 | 1869.4 | 1869.4 | 1869.4 |
| gdb 5545 | 1872.7 <sup>a</sup> | 1877.6 | 1855.9 | 1868.8 | 1873.5 | 1866.0 | 1863.4 | 1869.4 | 1869.3 | 1869.3 | 1869.3 | 1868.4 | 1868.3 | 1868.3 | 1868.3 |
| gdb 5546 | 1844.9 <sup>a</sup> | 1843.8 | 1816.5 | 1831.7 | 1840.2 | 1836.5 | 1833.4 | 1836.3 | 1836.3 | 1836.3 | 1836.3 | 1827.1 | 1827.1 | 1827.1 | 1827.1 |
| gdb 5547 | 1839.7 <sup>a</sup> | 1846.7 | 1820.2 | 1832.1 | 1842.4 | 1834.6 | 1831.3 | 1834.3 | 1834.3 | 1834.3 | 1834.3 | 1826.9 | 1826.8 | 1826.8 | 1826.8 |
| gdb 5548 | 1837.9 <sup>a</sup> | 1844.1 | 1817.6 | 1830.8 | 1843.2 | 1835.2 | 1830.7 | 1833.7 | 1833.7 | 1833.7 | 1833.7 | 1826.3 | 1826.3 | 1826.3 | 1826.3 |
| gdb 5549 | 1852.6 <sup>a</sup> | 1858.3 | 1835.8 | 1844.1 | 1855.6 | 1847.9 | 1844.3 | 1844.2 | 1844.2 | 1844.2 | 1844.2 | 1840.6 | 1840.6 | 1840.6 | 1840.6 |
| gdb 5550 | 1846.4 <sup>a</sup> | 1853.7 | 1831.3 | 1841.7 | 1853.7 | 1845.3 | 1840.3 | 1841.0 | 1840.9 | 1840.9 | 1840.9 | 1837.4 | 1837.4 | 1837.4 | 1837.4 |
| gdb 5551 | 1867.2 <sup>a</sup> | 1867.1 | 1853.9 | 1864.6 | 1864.5 | 1863.5 | 1864.5 | 1864.9 | 1864.9 | 1864.9 | 1864.9 | 1861.9 | 1861.9 | 1861.9 | 1861.9 |
| gdb 5552 | 1861.9 <sup>a</sup> | 1870.1 | 1857.3 | 1864.9 | 1868.8 | 1863.4 | 1863.6 | 1864.0 | 1864.0 | 1864.0 | 1864.0 | 1862.4 | 1862.4 | 1862.4 | 1862.4 |
| gdb 5553 | 1868.9 <sup>a</sup> | 1879.0 | 1868.1 | 1872.7 | 1876.6 | 1869.6 | 1872.6 | 1869.8 | 1869.8 | 1869.8 | 1869.8 | 1871.7 | 1871.7 | 1871.7 | 1871.7 |
| gdb 5554 | 1864.6 <sup>a</sup> | 1858.4 | 1847.3 | 1852.9 | 1857.6 | 1858.5 | 1857.9 | 1861.0 | 1861.0 | 1861.0 | 1861.0 | 1851.6 | 1851.5 | 1851.5 | 1851.5 |
| gdb 5555 | 1860.8 <sup>a</sup> | 1860.7 | 1850.9 | 1853.6 | 1864.8 | 1859.1 | 1858.0 | 1861.6 | 1861.6 | 1861.6 | 1861.6 | 1853.7 | 1853.6 | 1853.7 | 1853.7 |
| gdb 5556 | 1869.7 <sup>a</sup> | 1870.6 | 1864.6 | 1864.4 | 1873.8 | 1868.7 | 1868.1 | 1868.9 | 1868.9 | 1868.9 | 1868.9 | 1864.9 | 1864.8 | 1864.9 | 1864.9 |
| gdb 5557 | 1881.4 <sup>a</sup> | 1882.0 | 1876.0 | 1877.7 | 1883.0 | 1880.9 | 1874.8 | 1879.1 | 1879.1 | 1879.1 | 1879.1 | 1874.6 | 1874.6 | 1874.6 | 1874.6 |
| gdb 5558 | 1870.0 <sup>a</sup> | 1871.2 | 1859.5 | 1864.4 | 1872.9 | 1867.5 | 1861.1 | 1868.1 | 1868.1 | 1868.1 | 1868.1 | 1859.9 | 1859.9 | 1859.9 | 1859.9 |
| gdb 5559 | 1907.3 <sup>a</sup> | 1902.2 | 1896.6 | 1903.2 | 1908.2 | 1902.8 | 1901.5 | 1905.5 | 1905.5 | 1905.5 | 1905.5 | 1904.0 | 1904.0 | 1904.0 | 1904.0 |
| gdb 5560 | 1897.6 <sup>a</sup> | 1893.6 | 1889.1 | 1894.0 | 1897.6 | 1897.6 | 1896.8 | 1901.3 | 1901.2 | 1901.2 | 1901.2 | 1898.2 | 1898.2 | 1898.2 | 1898.2 |
| gdb 5561 | 1885.6 <sup>a</sup> | 1893.4 | 1889.5 | 1892.7 | 1897.4 | 1892.8 | 1889.0 | 1894.9 | 1894.9 | 1894.9 | 1894.9 | 1893.3 | 1893.3 | 1893.3 | 1893.3 |
| gdb 5562 | 1898.7 <sup>a</sup> | 1906.2 | 1904.6 | 1904.3 | 1909.0 | 1904.6 | 1904.6 | 1906.1 | 1906.1 | 1906.1 | 1906.1 | 1908.3 | 1908.3 | 1908.3 | 1908.3 |
| gdb 5563 | 1840.4 <sup>a</sup> | 1848.8 | 1821.5 | 1834.0 | 1844.1 | 1835.6 | 1830.0 | 1831.1 | 1831.0 | 1831.0 | 1831.0 | 1908.3 | 1908.3 | 1908.3 | 1908.3 |
| gdb 5564 | 1831.6 <sup>a</sup> | 1842.0 | 1811.9 | 1827.7 | 1841.8 | 1830.0 | 1817.5 | 1816.9 | 1816.9 | 1816.9 | 1816.9 | 1825.2 | 1825.2 | 1825.2 | 1825.2 |
| gdb 5565 | 1851.3 <sup>a</sup> | 1860.3 | 1836.1 | 1845.2 | 1854.9 | 1846.3 | 1842.5 | 1841.6 | 1841.6 | 1841.6 | 1841.6 | 1838.8 | 1838.8 | 1838.8 | 1838.8 |
| gdb 5566 | 1842.1 <sup>a</sup> | 1853.3 | 1824.4 | 1836.8 | 1853.6 | 1838.8 | 1830.4 | 1826.7 | 1826.7 | 1826.7 | 1826.7 | 1828.3 | 1828.3 | 1828.3 | 1828.3 |
| gdb 5567 | 1844.5 <sup>a</sup> | 1850.1 | 1820.1 | 1836.7 | 1851.4 | 1836.9 | 1824.5 | 1828.4 | 1828.4 | 1828.4 | 1828.4 | 1829.0 | 1829.0 | 1829.0 | 1829.0 |
| gdb 5568 | 1844.4 <sup>a</sup> | 1849.7 | 1814.5 | 1834.8 | 1844.6 | 1831.5 | 1823.8 | 1826.1 | 1826.1 | 1826.1 | 1826.1 | 1827.6 | 1827.6 | 1827.6 | 1827.6 |
| gdb 5569 | 1843.8 <sup>a</sup> | 1853.0 | 1821.0 | 1837.7 | 1845.2 | 1831.8 | 1827.3 | 1830.7 | 1830.7 | 1830.7 | 1830.7 | 1830.4 | 1830.4 | 1830.4 | 1830.4 |
| gdb 5570 | 1838.4 <sup>a</sup> | 1840.6 | 1805.5 | 1825.3 | 1841.6 | 1824.5 | 1812.6 | 1819.2 | 1819.2 | 1819.2 | 1819.2 | 1816.0 | 1815.9 | 1815.9 | 1815.9 |
| gdb 5571 | 1855.4 <sup>a</sup> | 1864.4 | 1836.1 | 1849.6 | 1856.5 | 1844.3 | 1833.9 | 1839.7 | 1839.7 | 1839.7 | 1839.7 | 1843.6 | 1843.6 | 1843.6 | 1843.6 |
| gdb 5572 | 1856.8 <sup>a</sup> | 1849.4 | 1823.5 | 1839.2 | 1854.8 | 1843.4 | 1839.9 | 1845.0 | 1845.0 | 1845.0 | 1845.0 | 1839.2 | 1839.2 | 1839.2 | 1839.2 |
| gdb 5573 | 1851.5 <sup>a</sup> | 1848.7 | 1828.9 | 1838.7 | 1848.3 | 1838.0 | 1830.2 | 1839.2 | 1839.2 | 1839.2 | 1839.2 | 1833.4 | 1833.4 | 1833.4 | 1833.4 |
| gdb 5574 | 1862.4 <sup>a</sup> | 1859.7 | 1838.8 | 1850.2 | 1862.5 | 1850.7 | 1844.6 | 1850.1 | 1850.1 | 1850.1 | 1850.1 | 1848.1 | 1848.1 | 1848.1 | 1848.1 |
| gdb 5575 | 1847.4 <sup>a</sup> | 1865.9 | 1838.4 | 1852.4 | 1862.9 | 1849.9 | 1836.5 | 1841.0 | 1841.0 | 1841.0 | 1841.0 | 1834.7 | 1834.7 | 1834.7 | 1834.7 |
| gdb 5576 | 1854.8 <sup>a</sup> | 1875.9 | 1851.0 | 1862.8 | 1871.7 | 1859.4 | 1848.4 | 1849.4 | 1849.4 | 1849.4 | 1849.4 | 1846.4 | 1846.4 | 1846.4 | 1846.4 |
| gdb 5577 | 1855.3 <sup>a</sup> | 1848.8 | 1825.4 | 1839.2 | 1852.5 | 1840.9 | 1833.6 | 1842.6 | 1842.6 | 1842.6 | 1842.6 | 1837.1 | 1837.1 | 1837.1 | 1837.1 |
| gdb 5578 | 1850.9 <sup>a</sup> | 1847.9 | 1824.5 | 1838.8 | 1853.6 | 1841.4 | 1833.0 | 1843.4 | 1843.4 | 1843.4 | 1843.4 | 1838.0 | 1838.0 | 1838.0 | 1838.0 |
| gdb 5579 | 1862.1 <sup>a</sup> | 1859.8 | 1837.3 | 1849.0 | 1860.1 | 1848.4 | 1844.2 | 1849.3 | 1849.3 | 1849.3 | 1849.3 | 1847.2 | 1847.2 | 1847.2 | 1847.2 |

... continued on next page ...

Table S26: . . . continued from previous page. . . .

| Molecule | Ref.                | MNDO   | AMI    | PM3    | PM6    | PM7    | OM1    | OM2    |        | OM3    |        | D3T    | OM3    | D3     | D3T    |
|----------|---------------------|--------|--------|--------|--------|--------|--------|--------|--------|--------|--------|--------|--------|--------|--------|
|          |                     |        |        |        |        |        |        | D2     | D3     | D2     | D3     |        |        |        |        |
| gdb 5580 | 1859.8 <sup>a</sup> | 1858.6 | 1838.3 | 1849.8 | 1863.8 | 1851.1 | 1843.8 | 1851.8 | 1851.8 | 1850.2 | 1850.2 | 1851.8 | 1850.2 | 1850.2 | 1850.2 |
| gdb 5581 | 1863.5 <sup>a</sup> | 1864.8 | 1851.5 | 1855.7 | 1864.1 | 1858.6 | 1856.2 | 1857.5 | 1857.5 | 1851.7 | 1851.7 | 1857.5 | 1851.7 | 1851.6 | 1851.7 |
| gdb 5582 | 1850.1 <sup>a</sup> | 1860.7 | 1848.2 | 1853.5 | 1865.0 | 1855.1 | 1847.0 | 1850.4 | 1850.3 | 1847.2 | 1847.2 | 1850.3 | 1847.2 | 1847.2 | 1847.2 |
| gdb 5583 | 1874.4 <sup>a</sup> | 1876.7 | 1866.2 | 1867.2 | 1875.2 | 1869.5 | 1868.9 | 1868.0 | 1868.0 | 1865.1 | 1865.1 | 1868.0 | 1865.1 | 1865.0 | 1865.1 |
| gdb 5584 | 1860.3 <sup>a</sup> | 1872.0 | 1860.3 | 1862.7 | 1873.3 | 1863.2 | 1859.6 | 1859.3 | 1859.3 | 1859.1 | 1859.0 | 1859.3 | 1859.1 | 1859.0 | 1859.0 |
| gdb 5585 | 1873.0 <sup>a</sup> | 1884.7 | 1872.5 | 1875.3 | 1878.0 | 1872.6 | 1867.7 | 1869.7 | 1869.7 | 1869.1 | 1869.1 | 1869.7 | 1869.1 | 1869.1 | 1869.1 |
| gdb 5586 | 1885.6 <sup>a</sup> | 1896.5 | 1888.1 | 1887.5 | 1891.4 | 1886.0 | 1882.4 | 1881.7 | 1881.7 | 1884.4 | 1884.4 | 1881.7 | 1884.4 | 1884.4 | 1884.4 |
| gdb 5587 | 1910.1 <sup>a</sup> | 1906.6 | 1900.0 | 1904.7 | 1909.9 | 1903.2 | 1903.2 | 1905.7 | 1905.7 | 1904.7 | 1904.7 | 1905.7 | 1904.7 | 1904.7 | 1904.7 |
| gdb 5588 | 1889.2 <sup>a</sup> | 1897.1 | 1889.4 | 1893.9 | 1898.1 | 1893.7 | 1889.7 | 1893.9 | 1893.8 | 1894.5 | 1894.4 | 1893.8 | 1894.5 | 1894.4 | 1894.4 |
| gdb 5589 | 1889.8 <sup>a</sup> | 1898.3 | 1891.2 | 1894.3 | 1898.5 | 1893.3 | 1891.7 | 1894.0 | 1894.0 | 1894.3 | 1894.2 | 1894.0 | 1894.3 | 1894.2 | 1894.3 |
| gdb 5590 | 1899.5 <sup>a</sup> | 1909.7 | 1904.8 | 1904.9 | 1907.9 | 1902.9 | 1903.7 | 1903.6 | 1903.6 | 1906.9 | 1906.8 | 1903.6 | 1906.9 | 1906.8 | 1906.8 |
| gdb 5591 | 1865.0 <sup>a</sup> | 1869.8 | 1850.9 | 1862.8 | 1865.3 | 1860.4 | 1856.5 | 1856.4 | 1856.3 | 1857.1 | 1857.0 | 1856.3 | 1857.1 | 1857.0 | 1857.1 |
| gdb 5592 | 1866.2 <sup>a</sup> | 1870.4 | 1851.6 | 1863.1 | 1865.7 | 1859.6 | 1854.7 | 1854.0 | 1853.9 | 1854.7 | 1854.6 | 1853.9 | 1854.7 | 1854.6 | 1854.6 |
| gdb 5593 | 1864.6 <sup>a</sup> | 1875.6 | 1858.0 | 1867.3 | 1868.5 | 1863.0 | 1861.4 | 1861.1 | 1861.1 | 1860.6 | 1860.6 | 1861.1 | 1860.6 | 1860.6 | 1860.6 |
| gdb 5594 | 1874.1 <sup>a</sup> | 1886.1 | 1871.9 | 1878.0 | 1878.8 | 1873.0 | 1873.3 | 1871.1 | 1871.1 | 1873.5 | 1873.5 | 1871.1 | 1873.5 | 1873.5 | 1873.5 |
| gdb 5595 | 1879.3 <sup>a</sup> | 1873.6 | 1860.9 | 1871.7 | 1879.2 | 1871.9 | 1868.0 | 1876.3 | 1876.3 | 1875.5 | 1875.5 | 1876.3 | 1875.5 | 1875.5 | 1875.5 |
| gdb 5596 | 1883.2 <sup>a</sup> | 1878.9 | 1865.7 | 1875.5 | 1879.2 | 1873.5 | 1872.3 | 1878.0 | 1877.9 | 1876.6 | 1876.6 | 1877.9 | 1876.6 | 1876.6 | 1876.6 |
| gdb 5597 | 1889.4 <sup>a</sup> | 1888.1 | 1878.3 | 1886.1 | 1889.0 | 1882.2 | 1880.6 | 1884.0 | 1884.0 | 1886.8 | 1886.7 | 1884.0 | 1886.8 | 1886.7 | 1886.8 |
| gdb 5598 | 1876.1 <sup>a</sup> | 1871.4 | 1871.7 | 1871.4 | 1879.0 | 1875.2 | 1869.0 | 1879.6 | 1879.6 | 1872.6 | 1872.6 | 1879.6 | 1872.6 | 1872.6 | 1872.6 |
| gdb 5599 | 1885.3 <sup>a</sup> | 1881.3 | 1885.5 | 1882.3 | 1889.4 | 1884.5 | 1879.2 | 1888.0 | 1888.0 | 1884.9 | 1884.9 | 1888.0 | 1884.9 | 1884.9 | 1884.9 |
| gdb 5600 | 1871.7 <sup>a</sup> | 1891.7 | 1870.1 | 1883.6 | 1885.4 | 1878.0 | 1870.0 | 1871.6 | 1871.6 | 1870.6 | 1870.6 | 1871.6 | 1870.6 | 1870.6 | 1870.6 |
| gdb 5601 | 1874.7 <sup>a</sup> | 1892.8 | 1872.0 | 1885.1 | 1889.6 | 1881.5 | 1872.4 | 1874.1 | 1874.1 | 1873.3 | 1873.2 | 1874.1 | 1873.3 | 1873.2 | 1873.3 |
| gdb 5602 | 1866.3 <sup>a</sup> | 1895.8 | 1874.8 | 1886.5 | 1886.9 | 1879.7 | 1873.4 | 1875.2 | 1875.2 | 1873.0 | 1873.0 | 1875.2 | 1873.0 | 1873.0 | 1873.0 |
| gdb 5603 | 1880.0 <sup>a</sup> | 1907.1 | 1890.1 | 1898.3 | 1900.4 | 1893.2 | 1885.9 | 1885.1 | 1885.1 | 1886.8 | 1886.8 | 1885.1 | 1886.8 | 1886.8 | 1886.8 |
| gdb 5604 | 1863.5 <sup>a</sup> | 1881.2 | 1873.1 | 1870.7 | 1878.7 | 1872.5 | 1863.2 | 1862.9 | 1862.9 | 1859.3 | 1859.3 | 1862.9 | 1859.3 | 1859.3 | 1859.3 |
| gdb 5605 | 1873.3 <sup>a</sup> | 1892.8 | 1887.2 | 1881.9 | 1891.1 | 1883.2 | 1875.9 | 1873.1 | 1873.1 | 1872.7 | 1872.7 | 1873.1 | 1872.7 | 1872.7 | 1872.7 |
| gdb 5606 | 1881.3 <sup>a</sup> | 1884.1 | 1876.6 | 1878.2 | 1882.5 | 1880.8 | 1875.2 | 1879.2 | 1879.2 | 1874.9 | 1874.9 | 1879.2 | 1874.9 | 1874.9 | 1874.9 |
| gdb 5607 | 1871.3 <sup>a</sup> | 1872.8 | 1861.9 | 1866.7 | 1871.9 | 1869.6 | 1862.9 | 1869.8 | 1869.8 | 1861.8 | 1861.8 | 1869.8 | 1861.8 | 1861.8 | 1861.8 |
| gdb 5608 | 1910.8 <sup>a</sup> | 1919.4 | 1919.3 | 1919.3 | 1920.4 | 1919.4 | 1912.2 | 1917.7 | 1917.7 | 1919.4 | 1919.4 | 1917.7 | 1919.4 | 1919.4 | 1919.4 |
| gdb 5609 | 1896.8 <sup>a</sup> | 1906.0 | 1902.2 | 1906.7 | 1907.1 | 1905.2 | 1894.7 | 1904.7 | 1904.7 | 1902.9 | 1902.9 | 1904.7 | 1902.9 | 1902.9 | 1902.9 |
| gdb 5610 | 1909.8 <sup>a</sup> | 1910.9 | 1913.3 | 1912.9 | 1911.4 | 1910.4 | 1908.4 | 1912.9 | 1912.9 | 1914.1 | 1914.1 | 1912.9 | 1914.1 | 1914.1 | 1914.1 |
| gdb 5611 | 1910.3 <sup>a</sup> | 1912.0 | 1911.7 | 1912.4 | 1909.5 | 1909.7 | 1909.9 | 1913.5 | 1913.5 | 1914.5 | 1914.5 | 1913.5 | 1914.5 | 1914.5 | 1914.5 |
| gdb 5612 | 1900.7 <sup>a</sup> | 1899.9 | 1899.6 | 1902.1 | 1902.7 | 1901.0 | 1897.7 | 1905.2 | 1905.2 | 1902.8 | 1902.8 | 1905.2 | 1902.8 | 1902.7 | 1902.7 |
| gdb 5613 | 1908.0 <sup>a</sup> | 1913.5 | 1914.9 | 1914.1 | 1914.1 | 1914.2 | 1910.6 | 1915.0 | 1914.9 | 1915.7 | 1915.7 | 1914.9 | 1915.7 | 1915.7 | 1915.7 |
| gdb 5614 | 1905.8 <sup>a</sup> | 1912.8 | 1909.9 | 1911.4 | 1907.6 | 1908.7 | 1908.9 | 1911.8 | 1911.7 | 1912.8 | 1912.8 | 1911.7 | 1912.8 | 1912.8 | 1912.8 |
| gdb 5615 | 1894.0 <sup>a</sup> | 1900.1 | 1898.0 | 1901.6 | 1900.4 | 1899.8 | 1893.0 | 1901.7 | 1901.7 | 1899.0 | 1899.0 | 1901.7 | 1899.0 | 1899.0 | 1899.0 |
| gdb 5616 | 1882.9 <sup>a</sup> | 1881.0 | 1871.3 | 1874.4 | 1879.6 | 1878.0 | 1874.4 | 1878.4 | 1878.4 | 1873.3 | 1873.3 | 1878.4 | 1873.3 | 1873.3 | 1873.3 |
| gdb 5617 | 1870.6 <sup>a</sup> | 1869.3 | 1856.4 | 1863.1 | 1872.0 | 1866.1 | 1859.1 | 1867.0 | 1867.0 | 1858.8 | 1858.8 | 1867.0 | 1858.8 | 1858.8 | 1858.8 |
| gdb 5618 | 1874.1 <sup>a</sup> | 1881.7 | 1870.5 | 1873.7 | 1879.3 | 1873.4 | 1868.6 | 1872.6 | 1872.6 | 1871.0 | 1870.9 | 1872.6 | 1871.0 | 1870.9 | 1870.9 |
| gdb 5619 | 1882.8 <sup>a</sup> | 1892.6 | 1884.6 | 1885.0 | 1889.7 | 1882.6 | 1878.1 | 1879.2 | 1879.2 | 1881.4 | 1881.4 | 1879.2 | 1881.4 | 1881.4 | 1881.4 |
| gdb 5620 | 1873.2 <sup>a</sup> | 1881.7 | 1873.3 | 1873.5 | 1879.3 | 1873.7 | 1871.5 | 1872.4 | 1872.4 | 1870.6 | 1870.6 | 1872.4 | 1870.6 | 1870.6 | 1870.6 |
| gdb 5621 | 1882.7 <sup>a</sup> | 1892.4 | 1888.8 | 1886.0 | 1889.4 | 1884.0 | 1882.0 | 1879.9 | 1879.9 | 1882.1 | 1882.1 | 1879.9 | 1882.1 | 1882.1 | 1882.1 |
| gdb 5622 | 1882.3 <sup>a</sup> | 1879.9 | 1872.0 | 1875.5 | 1881.1 | 1879.4 | 1873.0 | 1878.3 | 1878.3 | 1873.6 | 1873.6 | 1878.3 | 1873.6 | 1873.6 | 1873.6 |
| gdb 5623 | 1874.2 <sup>a</sup> | 1881.4 | 1871.3 | 1873.9 | 1879.2 | 1874.0 | 1869.4 | 1873.6 | 1873.5 | 1871.8 | 1871.8 | 1873.6 | 1871.8 | 1871.8 | 1871.8 |
| gdb 5624 | 1869.7 <sup>a</sup> | 1868.3 | 1855.8 | 1863.6 | 1871.8 | 1866.0 | 1859.0 | 1866.9 | 1866.9 | 1858.4 | 1858.4 | 1866.9 | 1858.4 | 1858.4 | 1858.4 |

. . . continued on next page . . .



Table S26: . . . continued from previous page. . . .

| Molecule | Ref.                | MNDO   | AMI    | PM3    | PM6    | PM7    | OM1    |        | OM2    |        | OM3    |        | D3T    |
|----------|---------------------|--------|--------|--------|--------|--------|--------|--------|--------|--------|--------|--------|--------|
|          |                     |        |        |        |        |        | D2     | D3     | D2     | D3     | D2     | D3     |        |
| gdb 5625 | 1884.7 <sup>a</sup> | 1892.5 | 1886.9 | 1886.5 | 1891.2 | 1886.5 | 1881.2 | 1882.4 | 1882.4 | 1882.4 | 1884.4 | 1884.4 | 1884.4 |
| gdb 5626 | 1867.7 <sup>a</sup> | 1872.4 | 1864.5 | 1866.4 | 1877.8 | 1871.2 | 1860.5 | 1867.1 | 1867.1 | 1867.1 | 1859.8 | 1859.8 | 1859.8 |
| gdb 5627 | 1878.1 <sup>a</sup> | 1883.0 | 1879.3 | 1878.3 | 1888.4 | 1881.9 | 1873.5 | 1876.0 | 1876.0 | 1876.0 | 1872.4 | 1872.4 | 1872.4 |
| gdb 5628 | 1871.0 <sup>a</sup> | 1885.9 | 1875.4 | 1878.1 | 1884.2 | 1877.2 | 1867.3 | 1870.4 | 1870.4 | 1870.4 | 1864.6 | 1864.6 | 1864.6 |
| gdb 5629 | 1870.1 <sup>a</sup> | 1885.7 | 1873.8 | 1877.2 | 1882.9 | 1875.5 | 1866.3 | 1869.3 | 1869.3 | 1869.3 | 1863.6 | 1863.6 | 1863.6 |
| gdb 5630 | 1880.8 <sup>a</sup> | 1897.1 | 1886.9 | 1886.8 | 1891.2 | 1884.8 | 1879.1 | 1877.9 | 1877.9 | 1877.9 | 1875.1 | 1875.1 | 1875.1 |
| gdb 5631 | 1879.7 <sup>a</sup> | 1896.4 | 1887.9 | 1888.4 | 1892.2 | 1885.3 | 1876.6 | 1876.9 | 1876.9 | 1876.9 | 1874.8 | 1874.7 | 1874.7 |
| gdb 5632 | 1868.7 <sup>a</sup> | 1874.3 | 1863.8 | 1866.7 | 1871.0 | 1868.8 | 1865.3 | 1869.7 | 1869.6 | 1869.6 | 1861.4 | 1861.4 | 1861.4 |
| gdb 5633 | 1881.6 <sup>a</sup> | 1886.0 | 1881.0 | 1879.4 | 1885.7 | 1883.8 | 1880.5 | 1881.8 | 1881.8 | 1881.8 | 1877.1 | 1877.1 | 1877.1 |
| gdb 5634 | 1890.3 <sup>a</sup> | 1896.6 | 1899.8 | 1898.5 | 1895.4 | 1895.1 | 1895.2 | 1897.2 | 1897.2 | 1897.2 | 1895.4 | 1895.4 | 1895.4 |
| gdb 5635 | 1900.1 <sup>a</sup> | 1907.7 | 1911.9 | 1907.9 | 1902.5 | 1903.1 | 1907.1 | 1904.8 | 1904.6 | 1904.7 | 1906.4 | 1906.4 | 1906.4 |
| gdb 5636 | 1873.4 <sup>a</sup> | 1878.0 | 1874.2 | 1870.8 | 1879.6 | 1876.2 | 1867.6 | 1869.8 | 1869.3 | 1869.5 | 1862.8 | 1862.7 | 1862.6 |
| gdb 5637 | 1885.1 <sup>a</sup> | 1890.6 | 1887.1 | 1881.5 | 1887.4 | 1885.2 | 1881.3 | 1878.4 | 1878.3 | 1878.3 | 1875.3 | 1875.2 | 1875.2 |
| gdb 5638 | 1912.1 <sup>a</sup> | 1913.6 | 1915.9 | 1915.8 | 1917.6 | 1914.7 | 1909.5 | 1912.8 | 1912.8 | 1912.8 | 1909.5 | 1909.4 | 1909.5 |
| gdb 5639 | 1896.4 <sup>a</sup> | 1905.3 | 1906.0 | 1902.3 | 1905.3 | 1904.2 | 1898.9 | 1903.5 | 1903.5 | 1903.5 | 1901.3 | 1901.2 | 1901.2 |
| gdb 5640 | 1906.3 <sup>a</sup> | 1916.0 | 1919.3 | 1912.5 | 1916.6 | 1914.2 | 1912.2 | 1912.6 | 1912.6 | 1912.6 | 1913.9 | 1913.9 | 1913.9 |
| gdb 5641 | 1913.5 <sup>a</sup> | 1921.4 | 1920.2 | 1925.6 | 1917.8 | 1919.7 | 1920.5 | 1924.2 | 1924.2 | 1924.2 | 1927.7 | 1927.7 | 1927.7 |
| gdb 5642 | 1913.0 <sup>a</sup> | 1918.3 | 1917.0 | 1917.5 | 1916.2 | 1914.9 | 1910.6 | 1915.4 | 1915.4 | 1915.4 | 1917.4 | 1917.4 | 1917.4 |
| gdb 5643 | 1925.7 <sup>a</sup> | 1916.0 | 1909.6 | 1916.4 | 1918.7 | 1916.2 | 1912.4 | 1919.5 | 1919.5 | 1919.5 | 1917.3 | 1917.3 | 1917.3 |
| gdb 5644 | 1904.0 <sup>a</sup> | 1907.0 | 1903.1 | 1906.4 | 1907.3 | 1905.1 | 1899.6 | 1907.6 | 1907.6 | 1907.6 | 1906.0 | 1906.0 | 1906.0 |
| gdb 5645 | 1875.4 <sup>a</sup> | 1886.2 | 1864.2 | 1878.1 | 1878.9 | 1875.7 | 1874.5 | 1877.6 | 1877.6 | 1877.6 | 1874.2 | 1874.1 | 1874.1 |
| gdb 5646 | 1897.8 <sup>a</sup> | 1893.5 | 1870.2 | 1884.6 | 1895.0 | 1885.9 | 1883.4 | 1884.7 | 1884.6 | 1884.6 | 1883.4 | 1883.4 | 1883.4 |
| gdb 5647 | 1872.3 <sup>a</sup> | 1887.3 | 1867.2 | 1878.6 | 1886.0 | 1877.5 | 1874.7 | 1877.9 | 1877.9 | 1877.9 | 1876.6 | 1876.6 | 1876.6 |
| gdb 5648 | 1881.6 <sup>a</sup> | 1897.8 | 1878.6 | 1887.1 | 1895.4 | 1885.0 | 1885.5 | 1884.9 | 1884.9 | 1884.9 | 1886.9 | 1886.8 | 1886.8 |
| gdb 5649 | 1898.4 <sup>a</sup> | 1909.5 | 1901.6 | 1911.5 | 1906.7 | 1904.9 | 1904.4 | 1904.9 | 1904.9 | 1904.9 | 1908.1 | 1908.1 | 1908.1 |
| gdb 5650 | 1895.0 <sup>a</sup> | 1891.4 | 1886.0 | 1891.6 | 1892.1 | 1892.5 | 1892.2 | 1896.9 | 1896.9 | 1896.9 | 1893.5 | 1893.5 | 1893.5 |
| gdb 5651 | 1912.1 <sup>a</sup> | 1903.0 | 1896.8 | 1902.4 | 1909.9 | 1904.1 | 1905.0 | 1909.3 | 1909.3 | 1909.3 | 1907.2 | 1907.2 | 1907.2 |
| gdb 5652 | 1891.9 <sup>a</sup> | 1894.5 | 1890.6 | 1892.9 | 1900.1 | 1894.2 | 1893.1 | 1898.3 | 1898.2 | 1898.3 | 1897.0 | 1897.0 | 1897.0 |
| gdb 5653 | 1900.6 <sup>a</sup> | 1905.3 | 1902.1 | 1901.5 | 1905.8 | 1901.3 | 1904.4 | 1905.0 | 1904.9 | 1904.9 | 1907.0 | 1907.0 | 1907.0 |
| gdb 5654 | 1912.8 <sup>a</sup> | 1916.5 | 1917.1 | 1917.7 | 1918.5 | 1916.1 | 1910.2 | 1916.2 | 1916.2 | 1916.2 | 1918.1 | 1918.1 | 1918.1 |
| gdb 5655 | 1925.8 <sup>a</sup> | 1914.8 | 1909.8 | 1916.6 | 1920.4 | 1917.4 | 1912.6 | 1920.3 | 1920.3 | 1920.3 | 1918.1 | 1918.1 | 1918.1 |
| gdb 5656 | 1904.7 <sup>a</sup> | 1906.2 | 1903.4 | 1906.5 | 1909.6 | 1906.7 | 1900.1 | 1909.0 | 1909.0 | 1909.0 | 1907.3 | 1907.3 | 1907.3 |
| gdb 5657 | 1920.6 <sup>a</sup> | 1925.0 | 1927.3 | 1931.2 | 1931.1 | 1931.1 | 1928.8 | 1934.9 | 1934.9 | 1934.9 | 1938.6 | 1938.6 | 1938.6 |
| gdb 5658 | 1915.5 <sup>a</sup> | 1915.2 | 1916.2 | 1917.2 | 1921.0 | 1918.3 | 1913.0 | 1915.4 | 1915.4 | 1915.4 | 1912.6 | 1912.6 | 1912.6 |
| gdb 5659 | 1898.2 <sup>a</sup> | 1904.7 | 1906.7 | 1903.8 | 1908.9 | 1906.6 | 1899.6 | 1904.0 | 1903.9 | 1904.0 | 1902.4 | 1902.4 | 1902.4 |
| gdb 5660 | 1908.4 <sup>a</sup> | 1915.7 | 1919.8 | 1914.2 | 1917.1 | 1915.7 | 1910.4 | 1911.4 | 1911.4 | 1911.4 | 1913.4 | 1913.4 | 1913.4 |
| gdb 5661 | 1854.0 <sup>a</sup> | 1870.7 | 1862.0 | 1863.8 | 1863.7 | 1857.1 | 1850.3 | 1851.7 | 1851.6 | 1851.7 | 1849.1 | 1849.1 | 1849.1 |
| gdb 5662 | 1851.7 <sup>a</sup> | 1869.2 | 1860.2 | 1863.5 | 1862.1 | 1853.2 | 1849.0 | 1849.0 | 1849.0 | 1849.0 | 1845.8 | 1845.8 | 1845.8 |
| gdb 5663 | 1850.9 <sup>a</sup> | 1871.5 | 1866.8 | 1866.5 | 1864.6 | 1858.2 | 1850.4 | 1853.9 | 1853.9 | 1853.9 | 1849.9 | 1849.9 | 1849.9 |
| gdb 5664 | 1857.7 <sup>a</sup> | 1881.6 | 1877.3 | 1874.2 | 1872.0 | 1866.1 | 1862.3 | 1860.5 | 1860.4 | 1860.5 | 1860.1 | 1860.1 | 1860.1 |
| gdb 5665 | 1857.3 <sup>a</sup> | 1867.8 | 1858.8 | 1863.7 | 1866.1 | 1859.1 | 1849.0 | 1855.2 | 1855.2 | 1855.2 | 1851.8 | 1851.8 | 1851.8 |
| gdb 5666 | 1850.9 <sup>a</sup> | 1868.4 | 1861.1 | 1864.4 | 1864.3 | 1857.4 | 1850.7 | 1857.7 | 1857.6 | 1857.7 | 1852.5 | 1852.5 | 1852.5 |
| gdb 5667 | 1858.7 <sup>a</sup> | 1879.6 | 1874.3 | 1875.2 | 1873.5 | 1867.1 | 1860.9 | 1864.6 | 1864.6 | 1864.6 | 1863.2 | 1863.2 | 1863.2 |
| gdb 5668 | 1914.0 <sup>a</sup> | 1917.9 | 1918.2 | 1919.3 | 1919.3 | 1916.9 | 1911.7 | 1917.2 | 1917.2 | 1917.2 | 1919.0 | 1919.0 | 1919.0 |
| gdb 5669 | 1902.3 <sup>a</sup> | 1907.4 | 1904.1 | 1906.6 | 1908.7 | 1906.1 | 1899.9 | 1908.5 | 1908.5 | 1908.5 | 1906.5 | 1906.5 | 1906.5 |

. . . continued on next page . . .

Table S26: ... continued from previous page. ...

| Molecule | Ref.                | MNDO   | AMI    | PM3    | PM6    | PM7    | OM1    | OM2    |        | OM3    |        | D3T    |
|----------|---------------------|--------|--------|--------|--------|--------|--------|--------|--------|--------|--------|--------|
|          |                     |        |        |        |        |        |        | D2     | D3     | D2     | D3     |        |
| gdb 5670 | 1857.2 <sup>a</sup> | 1871.6 | 1864.0 | 1864.9 | 1866.2 | 1859.4 | 1851.5 | 1853.0 | 1852.9 | 1850.7 | 1850.6 | 1850.6 |
| gdb 5671 | 1851.1 <sup>a</sup> | 1871.8 | 1867.8 | 1867.5 | 1867.7 | 1860.8 | 1852.3 | 1855.6 | 1855.6 | 1851.9 | 1851.9 | 1851.9 |
| gdb 5672 | 1858.6 <sup>a</sup> | 1881.7 | 1877.4 | 1874.9 | 1875.2 | 1865.9 | 1861.3 | 1860.3 | 1860.3 | 1860.0 | 1859.9 | 1859.9 |
| gdb 5673 | 1855.9 <sup>a</sup> | 1881.9 | 1867.2 | 1867.4 | 1868.5 | 1861.6 | 1853.3 | 1853.5 | 1853.5 | 1852.2 | 1852.2 | 1852.2 |
| gdb 5674 | 1895.1 <sup>a</sup> | 1898.7 | 1897.7 | 1899.4 | 1897.9 | 1898.6 | 1899.6 | 1903.2 | 1903.2 | 1901.4 | 1901.4 | 1901.4 |
| gdb 5675 | 1890.8 <sup>a</sup> | 1897.9 | 1899.3 | 1898.8 | 1894.6 | 1894.1 | 1895.0 | 1896.7 | 1896.4 | 1895.0 | 1894.9 | 1894.9 |
| gdb 5676 | 1899.1 <sup>a</sup> | 1909.0 | 1911.3 | 1907.9 | 1901.3 | 1901.8 | 1906.8 | 1904.2 | 1904.1 | 1905.7 | 1905.6 | 1905.7 |
| gdb 5677 | 1854.2 <sup>a</sup> | 1871.3 | 1864.0 | 1863.7 | 1865.6 | 1857.7 | 1851.0 | 1848.7 | 1848.6 | 1847.5 | 1847.5 | 1847.5 |
| gdb 5678 | 1857.8 <sup>a</sup> | 1867.5 | 1854.9 | 1856.6 | 1857.3 | 1855.7 | 1847.3 | 1852.8 | 1852.8 | 1848.7 | 1848.6 | 1848.6 |
| gdb 5679 | 1857.7 <sup>a</sup> | 1878.6 | 1866.8 | 1865.3 | 1866.2 | 1861.9 | 1855.1 | 1855.8 | 1855.8 | 1858.5 | 1858.5 | 1858.5 |
| gdb 5680 | 1847.3 <sup>a</sup> | 1866.9 | 1851.8 | 1853.7 | 1854.5 | 1850.1 | 1841.6 | 1844.6 | 1844.6 | 1844.4 | 1844.4 | 1844.4 |
| gdb 5681 | 1855.3 <sup>a</sup> | 1855.9 | 1852.6 | 1854.2 | 1854.6 | 1852.0 | 1846.7 | 1850.0 | 1849.9 | 1845.9 | 1845.9 | 1845.9 |
| gdb 5682 | 1846.6 <sup>a</sup> | 1854.7 | 1849.3 | 1851.0 | 1851.8 | 1847.0 | 1841.5 | 1842.2 | 1842.2 | 1842.0 | 1841.9 | 1841.9 |
| gdb 5683 | 1857.8 <sup>a</sup> | 1867.5 | 1864.4 | 1862.4 | 1863.5 | 1858.3 | 1855.9 | 1854.2 | 1854.2 | 1856.8 | 1856.7 | 1856.7 |
| gdb 5684 | 1894.0 <sup>a</sup> | 1893.9 | 1890.0 | 1895.9 | 1890.2 | 1891.5 | 1899.1 | 1899.8 | 1899.8 | 1901.6 | 1901.6 | 1901.6 |
| gdb 5685 | 1853.3 <sup>a</sup> | 1855.4 | 1849.0 | 1850.4 | 1849.7 | 1848.7 | 1843.7 | 1847.8 | 1847.8 | 1842.4 | 1842.4 | 1842.4 |
| gdb 5686 | 1853.2 <sup>a</sup> | 1856.2 | 1849.2 | 1850.9 | 1849.2 | 1848.8 | 1844.6 | 1847.8 | 1847.7 | 1842.6 | 1842.6 | 1842.6 |
| gdb 5687 | 1843.7 <sup>a</sup> | 1853.5 | 1849.4 | 1848.2 | 1851.2 | 1845.1 | 1836.8 | 1840.6 | 1840.6 | 1838.7 | 1838.7 | 1838.7 |
| gdb 5688 | 1845.1 <sup>a</sup> | 1854.9 | 1851.7 | 1848.9 | 1850.9 | 1845.5 | 1839.6 | 1842.1 | 1842.1 | 1840.0 | 1840.0 | 1840.0 |
| gdb 5689 | 1831.7 <sup>a</sup> | 1842.4 | 1833.9 | 1836.2 | 1837.2 | 1832.0 | 1823.4 | 1829.5 | 1829.4 | 1824.6 | 1824.5 | 1824.5 |
| gdb 5690 | 1856.9 <sup>a</sup> | 1866.5 | 1866.0 | 1861.3 | 1862.1 | 1856.5 | 1851.2 | 1852.3 | 1852.2 | 1852.9 | 1852.8 | 1852.8 |
| gdb 5691 | 1827.8 <sup>a</sup> | 1817.5 | 1779.6 | 1801.2 | 1819.2 | 1806.4 | 1804.1 | 1810.5 | 1810.5 | 1804.0 | 1804.0 | 1804.0 |
| gdb 5692 | 1815.2 <sup>a</sup> | 1816.0 | 1780.0 | 1799.0 | 1820.3 | 1802.5 | 1798.2 | 1803.0 | 1803.0 | 1800.2 | 1800.2 | 1800.2 |
| gdb 5693 | 1827.8 <sup>a</sup> | 1827.9 | 1794.9 | 1810.8 | 1832.1 | 1815.0 | 1811.8 | 1814.8 | 1814.8 | 1814.7 | 1814.6 | 1814.6 |
| gdb 5694 | 1839.2 <sup>a</sup> | 1833.1 | 1796.2 | 1813.6 | 1826.7 | 1814.8 | 1814.6 | 1816.1 | 1816.1 | 1814.7 | 1814.7 | 1814.7 |
| gdb 5695 | 1893.6 <sup>a</sup> | 1892.9 | 1867.8 | 1884.7 | 1893.3 | 1884.5 | 1876.2 | 1875.3 | 1875.2 | 1876.8 | 1876.7 | 1876.8 |
| gdb 5696 | 1878.9 <sup>a</sup> | 1889.5 | 1866.6 | 1881.5 | 1886.6 | 1881.9 | 1875.7 | 1878.3 | 1878.3 | 1876.5 | 1876.5 | 1876.5 |
| gdb 5697 | 1868.1 <sup>a</sup> | 1887.8 | 1866.7 | 1878.8 | 1886.3 | 1876.9 | 1869.0 | 1870.9 | 1870.9 | 1871.7 | 1871.7 | 1871.7 |
| gdb 5698 | 1878.0 <sup>a</sup> | 1899.3 | 1881.6 | 1890.7 | 1897.8 | 1888.2 | 1881.2 | 1881.2 | 1881.2 | 1884.7 | 1884.7 | 1884.7 |
| gdb 5699 | 1847.5 <sup>a</sup> | 1846.4 | 1817.1 | 1833.5 | 1841.0 | 1837.9 | 1833.6 | 1835.6 | 1835.6 | 1827.2 | 1827.2 | 1827.2 |
| gdb 5700 | 1836.6 <sup>a</sup> | 1845.2 | 1817.8 | 1831.3 | 1843.0 | 1834.5 | 1828.2 | 1829.5 | 1829.5 | 1824.0 | 1823.9 | 1823.9 |
| gdb 5701 | 1829.9 <sup>a</sup> | 1841.0 | 1810.1 | 1826.2 | 1838.7 | 1827.9 | 1814.8 | 1814.9 | 1814.9 | 1814.3 | 1814.2 | 1814.2 |
| gdb 5702 | 1846.7 <sup>a</sup> | 1856.8 | 1832.4 | 1842.9 | 1854.2 | 1845.6 | 1840.7 | 1840.1 | 1840.1 | 1837.1 | 1837.1 | 1837.1 |
| gdb 5703 | 1844.5 <sup>a</sup> | 1854.1 | 1827.5 | 1839.5 | 1854.8 | 1843.7 | 1832.0 | 1829.5 | 1829.5 | 1831.6 | 1831.5 | 1831.5 |
| gdb 5704 | 1852.8 <sup>a</sup> | 1860.7 | 1835.4 | 1845.4 | 1855.2 | 1847.5 | 1843.0 | 1842.8 | 1842.7 | 1839.5 | 1839.4 | 1839.4 |
| gdb 5705 | 1880.6 <sup>a</sup> | 1889.7 | 1881.8 | 1882.6 | 1885.7 | 1883.5 | 1879.4 | 1880.0 | 1879.9 | 1876.1 | 1876.1 | 1876.1 |
| gdb 5706 | 1894.5 <sup>a</sup> | 1895.2 | 1871.5 | 1884.9 | 1893.4 | 1883.5 | 1879.8 | 1879.5 | 1879.4 | 1878.8 | 1878.8 | 1878.8 |
| gdb 5707 | 1873.1 <sup>a</sup> | 1885.8 | 1861.0 | 1875.0 | 1878.9 | 1872.1 | 1866.6 | 1867.7 | 1867.7 | 1869.2 | 1869.2 | 1869.2 |
| gdb 5708 | 1878.3 <sup>a</sup> | 1889.3 | 1865.6 | 1879.7 | 1882.0 | 1879.3 | 1876.8 | 1879.0 | 1879.0 | 1875.9 | 1875.8 | 1875.8 |
| gdb 5709 | 1870.7 <sup>a</sup> | 1888.6 | 1866.6 | 1878.3 | 1884.3 | 1876.2 | 1871.8 | 1873.0 | 1873.0 | 1873.2 | 1873.2 | 1873.2 |
| gdb 5710 | 1881.5 <sup>a</sup> | 1900.3 | 1881.4 | 1890.0 | 1895.6 | 1887.3 | 1884.4 | 1883.8 | 1883.8 | 1886.6 | 1886.6 | 1886.6 |
| gdb 5711 | 1862.4 <sup>a</sup> | 1876.3 | 1862.3 | 1866.3 | 1872.9 | 1867.5 | 1859.2 | 1861.4 | 1861.4 | 1858.7 | 1858.7 | 1858.7 |
| gdb 5712 | 1875.8 <sup>a</sup> | 1888.7 | 1878.4 | 1878.8 | 1887.1 | 1881.7 | 1874.9 | 1874.6 | 1874.6 | 1874.7 | 1874.7 | 1874.7 |
| gdb 5713 | 1881.6 <sup>a</sup> | 1889.7 | 1879.8 | 1880.8 | 1884.0 | 1882.2 | 1878.1 | 1878.4 | 1878.3 | 1874.3 | 1874.3 | 1874.3 |
| gdb 5714 | 1893.3 <sup>a</sup> | 1895.5 | 1887.5 | 1894.9 | 1888.2 | 1890.9 | 1898.7 | 1898.5 | 1898.5 | 1900.9 | 1900.8 | 1900.8 |

... continued on next page ...



Table S26: ... continued from previous page. ...

| Molecule | Ref.                | MNDO   | AMI    | PM3    | PM6    | PM7    | OM1    |        | OM2    |        | OM3    |        | OM3    |        | D3T    | D3T    |
|----------|---------------------|--------|--------|--------|--------|--------|--------|--------|--------|--------|--------|--------|--------|--------|--------|--------|
|          |                     |        |        |        |        |        | OM1    | OM2    | D2     | D3     | D2     | D3     | D2     | D3     |        |        |
| gdb 5760 | 1856.5 <sup>a</sup> | 1866.1 | 1843.5 | 1852.5 | 1864.8 | 1852.9 | 1844.4 | 1844.3 | 1844.3 | 1844.3 | 1843.3 | 1843.3 | 1843.3 | 1843.3 | 1843.3 | 1843.3 |
| gdb 5761 | 1884.3 <sup>a</sup> | 1900.0 | 1889.3 | 1890.5 | 1895.0 | 1888.3 | 1880.8 | 1880.4 | 1880.4 | 1880.4 | 1880.4 | 1880.4 | 1880.4 | 1880.4 | 1880.4 | 1880.4 |
| gdb 5762 | 1896.4 <sup>a</sup> | 1899.0 | 1877.9 | 1892.4 | 1899.6 | 1890.4 | 1881.9 | 1883.1 | 1883.1 | 1883.1 | 1883.1 | 1883.1 | 1883.1 | 1883.1 | 1883.1 | 1883.1 |
| gdb 5763 | 1878.6 <sup>a</sup> | 1893.0 | 1871.2 | 1885.3 | 1893.0 | 1884.4 | 1873.7 | 1876.6 | 1876.6 | 1876.6 | 1876.6 | 1876.6 | 1876.6 | 1876.6 | 1876.6 | 1876.6 |
| gdb 5764 | 1872.7 <sup>a</sup> | 1896.4 | 1876.7 | 1887.8 | 1893.4 | 1884.6 | 1875.7 | 1878.5 | 1878.5 | 1878.5 | 1878.5 | 1878.5 | 1878.5 | 1878.5 | 1878.5 | 1878.5 |
| gdb 5765 | 1879.0 <sup>a</sup> | 1905.5 | 1889.1 | 1897.5 | 1901.0 | 1892.3 | 1883.9 | 1884.3 | 1884.3 | 1884.3 | 1884.3 | 1884.3 | 1884.3 | 1884.3 | 1884.3 | 1884.3 |
| gdb 5766 | 1870.2 <sup>a</sup> | 1869.4 | 1852.1 | 1864.7 | 1864.3 | 1863.8 | 1864.3 | 1866.8 | 1866.8 | 1866.8 | 1862.8 | 1862.8 | 1862.8 | 1862.8 | 1862.8 | 1862.8 |
| gdb 5767 | 1868.9 <sup>a</sup> | 1869.4 | 1851.2 | 1864.0 | 1868.4 | 1862.6 | 1858.4 | 1859.1 | 1859.1 | 1859.1 | 1859.5 | 1859.5 | 1859.5 | 1859.5 | 1859.5 | 1859.5 |
| gdb 5768 | 1869.9 <sup>a</sup> | 1875.2 | 1860.1 | 1868.4 | 1871.4 | 1865.5 | 1865.7 | 1867.7 | 1867.7 | 1867.7 | 1867.6 | 1867.6 | 1867.6 | 1867.6 | 1867.6 | 1867.6 |
| gdb 5769 | 1875.4 <sup>a</sup> | 1884.6 | 1872.0 | 1878.7 | 1879.2 | 1873.4 | 1874.0 | 1873.5 | 1873.5 | 1873.5 | 1875.6 | 1875.6 | 1875.6 | 1875.6 | 1875.6 | 1875.6 |
| gdb 5770 | 1883.2 <sup>a</sup> | 1876.1 | 1862.6 | 1875.1 | 1881.2 | 1874.4 | 1871.5 | 1880.7 | 1880.7 | 1880.7 | 1878.5 | 1878.5 | 1878.5 | 1878.5 | 1878.5 | 1878.5 |
| gdb 5771 | 1881.9 <sup>a</sup> | 1873.5 | 1860.8 | 1873.4 | 1882.2 | 1874.6 | 1870.5 | 1880.0 | 1880.0 | 1880.0 | 1879.2 | 1879.2 | 1879.2 | 1879.2 | 1879.2 | 1879.2 |
| gdb 5772 | 1883.5 <sup>a</sup> | 1878.5 | 1867.1 | 1877.1 | 1881.4 | 1874.9 | 1873.0 | 1880.1 | 1880.0 | 1880.0 | 1878.8 | 1878.8 | 1878.8 | 1878.8 | 1878.8 | 1878.8 |
| gdb 5773 | 1890.7 <sup>a</sup> | 1888.6 | 1877.8 | 1885.4 | 1887.8 | 1881.5 | 1882.7 | 1885.8 | 1885.8 | 1885.8 | 1887.8 | 1887.8 | 1887.8 | 1887.8 | 1887.8 | 1887.8 |
| gdb 5774 | 1886.7 <sup>a</sup> | 1878.8 | 1879.3 | 1880.7 | 1891.2 | 1885.7 | 1879.5 | 1895.3 | 1895.3 | 1895.3 | 1885.0 | 1885.0 | 1885.0 | 1885.0 | 1885.0 | 1885.0 |
| gdb 5775 | 1879.3 <sup>a</sup> | 1874.0 | 1873.0 | 1874.4 | 1883.1 | 1879.0 | 1871.9 | 1884.2 | 1884.2 | 1884.2 | 1876.6 | 1876.6 | 1876.6 | 1876.6 | 1876.6 | 1876.6 |
| gdb 5776 | 1885.0 <sup>a</sup> | 1876.7 | 1878.7 | 1877.1 | 1886.4 | 1881.6 | 1876.9 | 1888.8 | 1888.8 | 1888.8 | 1880.0 | 1880.0 | 1880.0 | 1880.0 | 1880.0 | 1880.0 |
| gdb 5777 | 1888.9 <sup>a</sup> | 1884.7 | 1884.5 | 1883.2 | 1893.5 | 1887.2 | 1884.4 | 1892.6 | 1892.6 | 1892.6 | 1888.3 | 1888.3 | 1888.3 | 1888.3 | 1888.3 | 1888.3 |
| gdb 5778 | 1889.3 <sup>a</sup> | 1882.9 | 1886.7 | 1883.9 | 1892.1 | 1887.8 | 1883.0 | 1892.0 | 1892.0 | 1892.0 | 1888.8 | 1888.8 | 1888.8 | 1888.8 | 1888.8 | 1888.8 |
| gdb 5779 | 1895.4 <sup>a</sup> | 1891.5 | 1885.5 | 1890.8 | 1890.9 | 1891.8 | 1892.8 | 1897.1 | 1897.1 | 1897.1 | 1893.5 | 1893.5 | 1893.5 | 1893.5 | 1893.5 | 1893.5 |
| gdb 5780 | 1891.4 <sup>a</sup> | 1893.9 | 1886.4 | 1891.2 | 1897.5 | 1894.3 | 1892.2 | 1897.4 | 1897.4 | 1897.4 | 1896.9 | 1896.9 | 1896.9 | 1896.9 | 1896.9 | 1896.9 |
| gdb 5781 | 1888.7 <sup>a</sup> | 1895.2 | 1889.6 | 1891.2 | 1896.5 | 1891.8 | 1891.8 | 1896.2 | 1896.2 | 1896.2 | 1894.4 | 1894.4 | 1894.4 | 1894.4 | 1894.4 | 1894.4 |
| gdb 5782 | 1900.2 <sup>a</sup> | 1905.7 | 1901.6 | 1900.8 | 1906.6 | 1900.6 | 1904.9 | 1904.8 | 1904.8 | 1904.8 | 1906.5 | 1906.5 | 1906.5 | 1906.5 | 1906.5 | 1906.5 |
| gdb 5783 | 1871.0 <sup>a</sup> | 1875.1 | 1871.5 | 1868.0 | 1878.8 | 1874.4 | 1865.9 | 1868.1 | 1868.1 | 1868.1 | 1861.2 | 1861.2 | 1861.2 | 1861.2 | 1861.2 | 1861.2 |
| gdb 5784 | 1872.6 <sup>a</sup> | 1883.7 | 1880.3 | 1875.4 | 1889.3 | 1881.5 | 1870.5 | 1873.9 | 1873.9 | 1873.9 | 1866.8 | 1866.8 | 1866.8 | 1866.8 | 1866.8 | 1866.8 |
| gdb 5785 | 1883.1 <sup>a</sup> | 1887.4 | 1885.2 | 1879.1 | 1886.0 | 1883.6 | 1880.1 | 1878.5 | 1878.4 | 1878.4 | 1874.4 | 1874.4 | 1874.4 | 1874.4 | 1874.4 | 1874.4 |
| gdb 5786 | 1877.0 <sup>a</sup> | 1890.0 | 1885.8 | 1882.5 | 1892.3 | 1884.6 | 1879.5 | 1877.5 | 1877.5 | 1877.5 | 1876.1 | 1876.1 | 1876.1 | 1876.1 | 1876.1 | 1876.1 |
| gdb 5787 | 1856.1 <sup>a</sup> | 1860.0 | 1842.8 | 1851.7 | 1863.1 | 1852.5 | 1842.9 | 1846.9 | 1846.9 | 1846.9 | 1843.4 | 1843.4 | 1843.4 | 1843.4 | 1843.4 | 1843.4 |
| gdb 5788 | 1867.1 <sup>a</sup> | 1870.0 | 1857.3 | 1861.4 | 1875.6 | 1863.8 | 1857.9 | 1865.8 | 1865.7 | 1865.8 | 1858.3 | 1858.3 | 1858.3 | 1858.3 | 1858.3 | 1858.3 |
| gdb 5789 | 1865.8 <sup>a</sup> | 1870.6 | 1858.1 | 1863.9 | 1873.6 | 1863.1 | 1854.3 | 1855.5 | 1855.5 | 1855.5 | 1855.8 | 1855.8 | 1855.8 | 1855.8 | 1855.8 | 1855.8 |
| gdb 5790 | 1870.2 <sup>a</sup> | 1876.0 | 1864.3 | 1868.8 | 1880.1 | 1869.4 | 1863.6 | 1868.0 | 1868.0 | 1868.0 | 1866.5 | 1866.5 | 1866.5 | 1866.5 | 1866.5 | 1866.5 |
| gdb 5791 | 1885.2 <sup>a</sup> | 1900.7 | 1890.6 | 1891.4 | 1896.6 | 1890.0 | 1882.1 | 1881.7 | 1881.6 | 1881.6 | 1880.1 | 1880.1 | 1880.1 | 1880.1 | 1880.1 | 1880.1 |
| gdb 5792 | 1854.6 <sup>a</sup> | 1866.7 | 1853.3 | 1857.6 | 1866.9 | 1857.7 | 1847.8 | 1852.9 | 1852.9 | 1852.9 | 1847.5 | 1847.5 | 1847.5 | 1847.5 | 1847.5 | 1847.5 |
| gdb 5793 | 1864.0 <sup>a</sup> | 1876.2 | 1861.6 | 1865.0 | 1874.6 | 1865.4 | 1859.1 | 1865.8 | 1865.8 | 1865.8 | 1857.9 | 1857.9 | 1857.9 | 1857.9 | 1857.9 | 1857.9 |
| gdb 5794 | 1863.6 <sup>a</sup> | 1877.7 | 1865.0 | 1866.5 | 1873.7 | 1865.2 | 1859.4 | 1860.1 | 1860.1 | 1860.1 | 1858.2 | 1858.2 | 1858.2 | 1858.2 | 1858.2 | 1858.2 |
| gdb 5795 | 1868.4 <sup>a</sup> | 1883.4 | 1870.2 | 1871.6 | 1880.6 | 1873.0 | 1867.3 | 1870.1 | 1870.1 | 1870.1 | 1868.1 | 1868.1 | 1868.1 | 1868.1 | 1868.1 | 1868.1 |
| gdb 5796 | 1856.5 <sup>a</sup> | 1872.0 | 1855.8 | 1860.8 | 1868.7 | 1860.4 | 1853.6 | 1858.8 | 1858.8 | 1858.8 | 1853.6 | 1853.6 | 1853.6 | 1853.6 | 1853.6 | 1853.6 |
| gdb 5797 | 1865.2 <sup>a</sup> | 1883.0 | 1868.0 | 1869.5 | 1879.5 | 1868.7 | 1864.6 | 1866.5 | 1866.5 | 1866.5 | 1864.4 | 1864.4 | 1864.4 | 1864.4 | 1864.4 | 1864.4 |
| gdb 5798 | 1867.0 <sup>a</sup> | 1881.1 | 1867.4 | 1870.0 | 1877.8 | 1869.5 | 1862.1 | 1863.3 | 1863.3 | 1863.3 | 1862.0 | 1862.0 | 1862.0 | 1862.0 | 1862.0 | 1862.0 |
| gdb 5799 | 1913.3 <sup>a</sup> | 1918.4 | 1917.1 | 1917.4 | 1915.8 | 1914.8 | 1911.3 | 1915.7 | 1915.7 | 1915.7 | 1917.5 | 1917.5 | 1917.5 | 1917.5 | 1917.5 | 1917.5 |
| gdb 5800 | 1901.7 <sup>a</sup> | 1907.6 | 1903.4 | 1905.8 | 1905.2 | 1904.2 | 1899.5 | 1907.1 | 1907.1 | 1907.1 | 1904.9 | 1904.9 | 1904.9 | 1904.9 | 1904.9 | 1904.9 |
| gdb 5801 | 1895.5 <sup>a</sup> | 1904.4 | 1904.0 | 1903.6 | 1898.7 | 1898.2 | 1897.9 | 1900.1 | 1900.1 | 1900.1 | 1898.7 | 1898.7 | 1898.7 | 1898.7 | 1898.7 | 1898.7 |
| gdb 5802 | 1903.7 <sup>a</sup> | 1915.0 | 1914.1 | 1914.0 | 1905.5 | 1903.5 | 1908.1 | 1905.6 | 1905.6 | 1905.6 | 1907.3 | 1907.3 | 1907.3 | 1907.3 | 1907.3 | 1907.3 |
| gdb 5803 | 1851.1 <sup>a</sup> | 1867.3 | 1850.8 | 1855.7 | 1861.4 | 1854.1 | 1845.0 | 1848.8 | 1848.8 | 1848.8 | 1843.8 | 1843.8 | 1843.8 | 1843.8 | 1843.8 | 1843.8 |
| gdb 5804 | 1863.5 <sup>a</sup> | 1877.0 | 1864.4 | 1865.5 | 1873.8 | 1865.4 | 1859.9 | 1859.9 | 1859.9 | 1859.9 | 1858.1 | 1858.1 | 1858.1 | 1858.1 | 1858.1 | 1858.1 |

... continued on next page ...

Table S26: ... continued from previous page. ...

| Molecule | Ref.                | MNDO   | AMI    | PM3    | PM6    | PM7    | OM1    | OM2    |        | OM3    |        | D3     | D3T    |
|----------|---------------------|--------|--------|--------|--------|--------|--------|--------|--------|--------|--------|--------|--------|
|          |                     |        |        |        |        |        |        | D2     | D3     | D2     | D3     |        |        |
| gdb 5805 | 1919.2 <sup>a</sup> | 1913.8 | 1915.4 | 1915.4 | 1918.9 | 1916.1 | 1912.0 | 1915.2 | 1915.2 | 1912.1 | 1912.1 | 1912.1 | 1912.1 |
| gdb 5806 | 1902.2 <sup>a</sup> | 1904.6 | 1909.2 | 1904.7 | 1910.2 | 1907.1 | 1900.9 | 1906.2 | 1906.2 | 1904.0 | 1904.0 | 1904.0 | 1904.0 |
| gdb 5807 | 1911.2 <sup>a</sup> | 1915.2 | 1920.5 | 1913.5 | 1915.5 | 1913.8 | 1911.7 | 1913.0 | 1913.0 | 1914.1 | 1914.0 | 1914.0 | 1914.0 |
| gdb 5808 | 1869.6 <sup>a</sup> | 1874.0 | 1864.5 | 1866.4 | 1871.8 | 1869.4 | 1865.3 | 1869.7 | 1869.7 | 1861.5 | 1861.5 | 1861.5 | 1861.5 |
| gdb 5809 | 1880.6 <sup>a</sup> | 1884.4 | 1876.8 | 1876.0 | 1880.8 | 1878.8 | 1878.5 | 1878.2 | 1878.2 | 1873.6 | 1873.6 | 1873.6 | 1873.6 |
| gdb 5810 | 1890.4 <sup>a</sup> | 1897.4 | 1901.6 | 1899.8 | 1897.9 | 1897.4 | 1896.5 | 1898.3 | 1898.3 | 1896.7 | 1896.7 | 1896.7 | 1896.7 |
| gdb 5811 | 1899.5 <sup>a</sup> | 1907.8 | 1911.5 | 1907.9 | 1901.8 | 1902.4 | 1907.2 | 1904.7 | 1904.7 | 1906.4 | 1906.4 | 1906.4 | 1906.4 |
| gdb 5812 | 1869.7 <sup>a</sup> | 1876.6 | 1871.4 | 1866.2 | 1878.6 | 1871.1 | 1866.2 | 1867.4 | 1867.4 | 1860.0 | 1860.0 | 1860.0 | 1860.0 |
| gdb 5813 | 1881.8 <sup>a</sup> | 1887.6 | 1885.1 | 1878.3 | 1885.6 | 1883.3 | 1879.8 | 1877.9 | 1877.9 | 1873.8 | 1873.8 | 1873.8 | 1873.8 |
| gdb 5814 | 1897.9 <sup>a</sup> | 1905.2 | 1906.6 | 1902.9 | 1906.6 | 1905.2 | 1899.0 | 1902.6 | 1902.6 | 1900.8 | 1900.8 | 1900.8 | 1900.8 |
| gdb 5815 | 1908.2 <sup>a</sup> | 1914.8 | 1920.4 | 1913.0 | 1917.4 | 1915.3 | 1912.7 | 1912.6 | 1912.6 | 1914.1 | 1914.0 | 1914.0 | 1914.0 |
| gdb 5816 | 1913.3 <sup>a</sup> | 1921.8 | 1919.6 | 1924.6 | 1916.1 | 1918.9 | 1921.0 | 1924.2 | 1924.2 | 1927.2 | 1927.2 | 1927.2 | 1927.2 |
| gdb 5817 | 1915.3 <sup>a</sup> | 1912.5 | 1914.2 | 1913.8 | 1915.9 | 1912.5 | 1906.9 | 1910.4 | 1910.3 | 1907.3 | 1907.2 | 1907.2 | 1907.2 |
| gdb 5818 | 1902.2 <sup>a</sup> | 1904.6 | 1906.4 | 1903.8 | 1907.3 | 1906.5 | 1900.9 | 1906.6 | 1906.6 | 1904.2 | 1904.1 | 1904.1 | 1904.1 |
| gdb 5819 | 1898.0 <sup>a</sup> | 1902.2 | 1906.8 | 1904.0 | 1907.6 | 1904.8 | 1895.3 | 1901.6 | 1901.6 | 1899.6 | 1899.5 | 1899.6 | 1899.6 |
| gdb 5820 | 1909.1 <sup>a</sup> | 1915.6 | 1917.6 | 1910.8 | 1915.4 | 1910.9 | 1910.3 | 1910.5 | 1910.5 | 1911.6 | 1911.6 | 1911.5 | 1911.5 |
| gdb 5821 | 1864.1 <sup>a</sup> | 1878.4 | 1878.6 | 1874.6 | 1874.3 | 1868.8 | 1865.5 | 1874.1 | 1874.0 | 1864.4 | 1864.3 | 1864.3 | 1864.3 |
| gdb 5822 | 1866.2 <sup>a</sup> | 1879.5 | 1880.3 | 1875.5 | 1876.5 | 1871.3 | 1867.6 | 1875.0 | 1874.9 | 1865.7 | 1865.6 | 1865.6 | 1865.6 |
| gdb 5823 | 1866.8 <sup>a</sup> | 1878.5 | 1883.3 | 1874.7 | 1876.4 | 1869.4 | 1865.6 | 1871.2 | 1871.2 | 1863.2 | 1863.2 | 1863.2 | 1863.2 |
| gdb 5824 | 1866.1 <sup>a</sup> | 1878.0 | 1880.4 | 1874.0 | 1875.4 | 1868.9 | 1867.5 | 1873.4 | 1873.3 | 1864.7 | 1864.7 | 1864.7 | 1864.7 |
| gdb 5825 | 1856.2 <sup>a</sup> | 1870.7 | 1872.8 | 1867.7 | 1868.2 | 1862.6 | 1858.1 | 1863.8 | 1863.7 | 1857.5 | 1857.5 | 1857.5 | 1857.5 |
| gdb 5826 | 1869.9 <sup>a</sup> | 1884.6 | 1889.3 | 1880.2 | 1878.9 | 1873.9 | 1872.0 | 1873.1 | 1873.1 | 1870.8 | 1870.6 | 1870.6 | 1870.6 |
| gdb 5827 | 1869.5 <sup>a</sup> | 1884.0 | 1886.4 | 1878.4 | 1878.0 | 1873.4 | 1873.4 | 1875.0 | 1874.9 | 1872.1 | 1872.1 | 1872.1 | 1872.1 |
| gdb 5828 | 1865.9 <sup>a</sup> | 1881.8 | 1884.0 | 1876.4 | 1874.4 | 1869.5 | 1870.3 | 1871.4 | 1871.4 | 1868.2 | 1868.1 | 1868.1 | 1868.1 |
| gdb 5829 | 1897.2 <sup>a</sup> | 1904.4 | 1900.9 | 1902.5 | 1898.4 | 1898.5 | 1899.1 | 1902.1 | 1902.1 | 1900.5 | 1900.5 | 1900.5 | 1900.5 |
| gdb 5830 | 1894.3 <sup>a</sup> | 1904.3 | 1901.7 | 1902.0 | 1895.6 | 1895.5 | 1896.5 | 1898.1 | 1898.1 | 1896.5 | 1896.5 | 1896.5 | 1896.5 |
| gdb 5831 | 1902.9 <sup>a</sup> | 1915.6 | 1915.4 | 1912.9 | 1904.4 | 1904.8 | 1907.1 | 1905.4 | 1905.4 | 1907.5 | 1907.5 | 1907.5 | 1907.5 |
| gdb 5832 | 1854.6 <sup>a</sup> | 1867.4 | 1860.9 | 1862.5 | 1863.4 | 1856.5 | 1846.7 | 1852.1 | 1852.1 | 1848.7 | 1848.6 | 1848.6 | 1848.6 |
| gdb 5833 | 1852.5 <sup>a</sup> | 1865.2 | 1857.0 | 1861.4 | 1863.0 | 1855.7 | 1845.5 | 1851.7 | 1851.7 | 1848.1 | 1848.1 | 1848.1 | 1848.1 |
| gdb 5834 | 1853.8 <sup>a</sup> | 1868.2 | 1857.4 | 1861.7 | 1860.6 | 1855.8 | 1849.6 | 1855.0 | 1855.0 | 1850.2 | 1850.2 | 1850.2 | 1850.2 |
| gdb 5835 | 1850.0 <sup>a</sup> | 1868.7 | 1860.0 | 1862.4 | 1861.9 | 1857.0 | 1850.4 | 1856.2 | 1856.2 | 1850.9 | 1850.8 | 1850.9 | 1850.9 |
| gdb 5836 | 1844.9 <sup>a</sup> | 1855.6 | 1845.1 | 1851.2 | 1852.8 | 1846.4 | 1836.3 | 1845.3 | 1845.3 | 1837.4 | 1837.3 | 1837.4 | 1837.4 |
| gdb 5837 | 1857.9 <sup>a</sup> | 1878.1 | 1871.1 | 1873.7 | 1872.3 | 1864.4 | 1862.2 | 1864.1 | 1864.1 | 1861.9 | 1861.8 | 1861.8 | 1861.8 |
| gdb 5838 | 1855.5 <sup>a</sup> | 1883.1 | 1869.8 | 1867.8 | 1867.9 | 1861.3 | 1852.7 | 1852.3 | 1852.3 | 1851.3 | 1851.3 | 1851.3 | 1851.3 |
| gdb 5839 | 1851.7 <sup>a</sup> | 1880.8 | 1866.2 | 1866.1 | 1865.6 | 1858.8 | 1850.2 | 1850.2 | 1850.1 | 1848.7 | 1848.7 | 1848.7 | 1848.7 |
| gdb 5840 | 1844.0 <sup>a</sup> | 1870.8 | 1854.5 | 1856.2 | 1856.3 | 1849.7 | 1840.4 | 1843.7 | 1843.7 | 1838.3 | 1838.2 | 1838.2 | 1838.2 |
| gdb 5841 | 1843.5 <sup>a</sup> | 1860.1 | 1851.9 | 1852.8 | 1853.7 | 1846.9 | 1838.7 | 1840.3 | 1840.3 | 1834.5 | 1834.4 | 1834.4 | 1834.4 |
| gdb 5842 | 1850.8 <sup>a</sup> | 1870.3 | 1861.8 | 1860.6 | 1863.7 | 1853.3 | 1849.6 | 1845.8 | 1845.8 | 1844.2 | 1844.2 | 1844.2 | 1844.2 |
| gdb 5843 | 1851.7 <sup>a</sup> | 1870.1 | 1863.8 | 1862.7 | 1862.3 | 1855.3 | 1848.0 | 1846.9 | 1846.9 | 1844.6 | 1844.6 | 1844.6 | 1844.6 |
| gdb 5844 | 1894.8 <sup>a</sup> | 1903.9 | 1901.1 | 1902.9 | 1898.9 | 1899.0 | 1899.6 | 1903.0 | 1903.0 | 1901.5 | 1901.5 | 1901.5 | 1901.5 |
| gdb 5845 | 1894.0 <sup>a</sup> | 1904.4 | 1902.1 | 1901.5 | 1897.8 | 1896.8 | 1897.2 | 1899.1 | 1899.1 | 1897.1 | 1897.1 | 1897.1 | 1897.1 |
| gdb 5846 | 1900.7 <sup>a</sup> | 1914.3 | 1915.7 | 1913.2 | 1905.4 | 1905.7 | 1907.5 | 1906.4 | 1906.4 | 1908.5 | 1908.4 | 1908.4 | 1908.4 |
| gdb 5847 | 1902.1 <sup>a</sup> | 1903.9 | 1906.0 | 1902.9 | 1905.9 | 1906.3 | 1901.5 | 1906.8 | 1906.8 | 1904.1 | 1904.1 | 1904.1 | 1904.1 |
| gdb 5848 | 1900.7 <sup>a</sup> | 1905.3 | 1906.6 | 1902.2 | 1904.9 | 1903.7 | 1899.4 | 1904.1 | 1904.1 | 1901.2 | 1901.2 | 1901.2 | 1901.2 |
| gdb 5849 | 1910.1 <sup>a</sup> | 1914.5 | 1921.4 | 1914.0 | 1916.0 | 1914.8 | 1910.8 | 1912.6 | 1912.6 | 1913.9 | 1913.9 | 1913.9 | 1913.9 |

... continued on next page ...

Table S26: . . . continued from previous page. . . .

| Molecule | Ref.                | MNDO   | AMI    | PM3    | PM6    | PM7    | OM1    | OM2    |        | OM3    |        | D3T    | OM3    | D3     | D3T    |
|----------|---------------------|--------|--------|--------|--------|--------|--------|--------|--------|--------|--------|--------|--------|--------|--------|
|          |                     |        |        |        |        |        |        | D2     | D3     | D2     | D3     |        |        |        |        |
| gdb 5850 | 1878.9 <sup>a</sup> | 1890.2 | 1893.4 | 1883.5 | 1889.6 | 1884.7 | 1877.1 | 1878.6 | 1878.6 | 1878.6 | 1870.9 | 1878.6 | 1870.9 | 1870.9 | 1870.9 |
| gdb 5851 | 1884.8 <sup>a</sup> | 1898.6 | 1902.3 | 1889.3 | 1895.7 | 1892.9 | 1886.0 | 1883.1 | 1883.1 | 1883.1 | 1881.3 | 1883.1 | 1881.3 | 1881.2 | 1881.2 |
| gdb 5852 | 1865.3 <sup>a</sup> | 1878.8 | 1880.4 | 1874.3 | 1873.7 | 1868.1 | 1865.3 | 1873.2 | 1873.2 | 1873.2 | 1863.6 | 1873.2 | 1863.6 | 1863.5 | 1863.5 |
| gdb 5853 | 1856.6 <sup>a</sup> | 1870.8 | 1872.8 | 1867.7 | 1867.7 | 1862.4 | 1859.1 | 1865.0 | 1865.0 | 1865.0 | 1858.0 | 1865.0 | 1858.0 | 1858.0 | 1858.0 |
| gdb 5854 | 1857.2 <sup>a</sup> | 1871.6 | 1875.4 | 1868.2 | 1867.8 | 1862.2 | 1857.5 | 1862.7 | 1862.6 | 1862.6 | 1856.5 | 1862.6 | 1856.5 | 1856.5 | 1856.5 |
| gdb 5855 | 1866.5 <sup>a</sup> | 1878.4 | 1883.3 | 1874.8 | 1876.2 | 1869.5 | 1866.2 | 1872.1 | 1872.1 | 1872.1 | 1863.7 | 1872.1 | 1863.7 | 1863.6 | 1863.6 |
| gdb 5856 | 1865.8 <sup>a</sup> | 1881.3 | 1883.6 | 1876.1 | 1874.0 | 1869.1 | 1870.4 | 1871.3 | 1871.3 | 1871.3 | 1868.0 | 1871.3 | 1868.0 | 1868.0 | 1868.0 |
| gdb 5857 | 1866.6 <sup>a</sup> | 1882.1 | 1888.0 | 1878.6 | 1876.2 | 1870.7 | 1867.5 | 1869.6 | 1869.6 | 1869.6 | 1867.2 | 1869.6 | 1867.2 | 1867.2 | 1867.2 |
| gdb 5858 | 1869.7 <sup>a</sup> | 1884.3 | 1888.9 | 1879.8 | 1878.1 | 1873.4 | 1872.1 | 1873.3 | 1873.0 | 1873.0 | 1870.7 | 1873.0 | 1870.7 | 1870.7 | 1870.7 |
| gdb 5859 | 1867.0 <sup>a</sup> | 1893.9 | 1888.8 | 1885.9 | 1879.4 | 1879.0 | 1881.8 | 1882.8 | 1882.8 | 1882.8 | 1884.3 | 1882.8 | 1884.3 | 1884.2 | 1884.2 |
| gdb 5860 | 1862.2 <sup>a</sup> | 1880.2 | 1873.8 | 1874.1 | 1866.2 | 1865.0 | 1865.8 | 1870.0 | 1869.9 | 1869.9 | 1868.5 | 1869.9 | 1868.5 | 1868.4 | 1868.4 |
| gdb 5861 | 1874.1 <sup>a</sup> | 1892.6 | 1888.8 | 1886.7 | 1878.0 | 1878.3 | 1879.1 | 1881.3 | 1881.3 | 1881.3 | 1883.2 | 1881.3 | 1883.2 | 1883.2 | 1883.2 |
| gdb 5862 | 1884.1 <sup>a</sup> | 1892.0 | 1887.9 | 1887.1 | 1883.5 | 1881.0 | 1877.7 | 1879.8 | 1879.8 | 1879.8 | 1878.5 | 1879.8 | 1878.5 | 1878.5 | 1878.5 |
| gdb 5863 | 1872.7 <sup>a</sup> | 1890.5 | 1888.6 | 1884.2 | 1873.9 | 1874.9 | 1879.3 | 1878.0 | 1878.0 | 1878.0 | 1879.8 | 1878.0 | 1879.8 | 1879.8 | 1879.8 |
| gdb 5864 | 1870.4 <sup>a</sup> | 1889.3 | 1887.1 | 1885.0 | 1873.6 | 1875.1 | 1879.8 | 1877.7 | 1877.7 | 1877.7 | 1879.7 | 1877.7 | 1879.7 | 1879.7 | 1879.7 |
| gdb 5865 | 1859.9 <sup>a</sup> | 1877.5 | 1874.5 | 1873.1 | 1862.3 | 1862.3 | 1864.4 | 1866.4 | 1866.4 | 1866.4 | 1865.1 | 1866.4 | 1865.1 | 1865.1 | 1865.1 |
| gdb 5866 | 1852.3 <sup>a</sup> | 1866.1 | 1855.6 | 1854.0 | 1854.1 | 1851.8 | 1846.3 | 1849.0 | 1848.8 | 1848.8 | 1845.7 | 1848.8 | 1845.7 | 1845.6 | 1845.6 |
| gdb 5867 | 1839.8 <sup>a</sup> | 1853.2 | 1839.9 | 1841.2 | 1840.4 | 1837.6 | 1832.6 | 1837.6 | 1837.6 | 1837.6 | 1830.7 | 1837.6 | 1830.7 | 1830.7 | 1830.7 |
| gdb 5868 | 1842.0 <sup>a</sup> | 1864.3 | 1851.0 | 1850.4 | 1849.7 | 1844.4 | 1841.0 | 1842.5 | 1842.5 | 1842.5 | 1841.2 | 1842.5 | 1841.2 | 1841.2 | 1841.2 |
| gdb 5869 | 1854.6 <sup>a</sup> | 1877.1 | 1866.6 | 1863.0 | 1863.8 | 1859.0 | 1854.4 | 1853.7 | 1853.7 | 1853.7 | 1856.4 | 1853.7 | 1856.4 | 1856.4 | 1856.4 |
| gdb 5870 | 1852.1 <sup>a</sup> | 1868.6 | 1858.2 | 1854.9 | 1854.7 | 1852.6 | 1849.5 | 1848.4 | 1848.4 | 1848.4 | 1845.7 | 1848.4 | 1845.7 | 1845.7 | 1845.7 |
| gdb 5871 | 1841.8 <sup>a</sup> | 1867.0 | 1856.9 | 1852.9 | 1852.9 | 1846.4 | 1843.6 | 1841.1 | 1841.1 | 1841.1 | 1840.9 | 1841.1 | 1840.9 | 1840.8 | 1840.8 |
| gdb 5872 | 1839.5 <sup>a</sup> | 1855.8 | 1842.5 | 1842.1 | 1841.0 | 1838.4 | 1835.9 | 1837.1 | 1837.1 | 1837.1 | 1830.8 | 1837.1 | 1830.8 | 1830.8 | 1830.8 |
| gdb 5873 | 1854.1 <sup>a</sup> | 1879.7 | 1870.9 | 1865.6 | 1866.3 | 1860.5 | 1856.9 | 1852.2 | 1852.2 | 1852.2 | 1855.6 | 1852.2 | 1855.6 | 1855.6 | 1855.6 |
| gdb 5874 | 1836.2 <sup>a</sup> | 1868.1 | 1851.3 | 1851.5 | 1850.6 | 1843.2 | 1836.9 | 1836.6 | 1836.6 | 1836.6 | 1831.9 | 1836.6 | 1831.9 | 1831.9 | 1831.9 |
| gdb 5875 | 1836.2 <sup>a</sup> | 1869.4 | 1854.0 | 1852.0 | 1850.7 | 1843.0 | 1836.1 | 1835.4 | 1835.3 | 1835.3 | 1830.8 | 1835.3 | 1830.8 | 1830.8 | 1830.8 |
| gdb 5876 | 1848.9 <sup>a</sup> | 1880.9 | 1867.0 | 1864.3 | 1864.3 | 1857.4 | 1850.5 | 1848.1 | 1848.1 | 1848.1 | 1846.9 | 1848.1 | 1846.9 | 1846.9 | 1846.9 |
| gdb 5877 | 1848.8 <sup>a</sup> | 1882.3 | 1869.7 | 1864.8 | 1864.0 | 1857.3 | 1849.7 | 1846.7 | 1846.7 | 1846.7 | 1845.8 | 1846.7 | 1845.8 | 1845.8 | 1845.8 |
| gdb 5878 | 1878.1 <sup>a</sup> | 1894.1 | 1892.9 | 1889.7 | 1886.8 | 1885.5 | 1880.8 | 1883.6 | 1883.4 | 1883.4 | 1886.8 | 1883.4 | 1886.8 | 1886.7 | 1886.7 |
| gdb 5879 | 1865.8 <sup>a</sup> | 1881.3 | 1877.5 | 1877.1 | 1873.9 | 1871.8 | 1867.6 | 1872.7 | 1872.7 | 1872.7 | 1872.3 | 1872.7 | 1872.3 | 1872.3 | 1872.3 |
| gdb 5880 | 1836.6 <sup>a</sup> | 1854.7 | 1844.3 | 1840.8 | 1839.4 | 1836.5 | 1836.8 | 1835.6 | 1835.6 | 1835.6 | 1829.7 | 1835.6 | 1829.7 | 1829.7 | 1829.7 |
| gdb 5881 | 1849.2 <sup>a</sup> | 1867.5 | 1859.9 | 1853.4 | 1852.7 | 1850.4 | 1850.3 | 1846.9 | 1846.9 | 1846.9 | 1844.6 | 1846.9 | 1844.6 | 1844.6 | 1844.6 |
| gdb 5882 | 1882.0 <sup>a</sup> | 1891.0 | 1892.1 | 1887.6 | 1883.3 | 1880.2 | 1881.1 | 1878.3 | 1878.3 | 1878.3 | 1877.1 | 1878.3 | 1877.1 | 1876.4 | 1877.0 |
| gdb 5883 | 1858.4 <sup>a</sup> | 1879.6 | 1877.5 | 1873.9 | 1863.1 | 1862.5 | 1866.1 | 1863.7 | 1863.7 | 1863.7 | 1864.2 | 1863.7 | 1864.2 | 1864.2 | 1864.2 |
| gdb 5884 | 1870.9 <sup>a</sup> | 1892.4 | 1893.1 | 1886.6 | 1876.4 | 1876.4 | 1879.5 | 1874.9 | 1874.9 | 1874.9 | 1879.0 | 1874.9 | 1879.0 | 1879.0 | 1879.0 |
| gdb 5885 | 1874.7 <sup>a</sup> | 1893.1 | 1889.8 | 1887.2 | 1881.7 | 1879.9 | 1880.1 | 1882.0 | 1881.6 | 1881.6 | 1883.9 | 1881.6 | 1883.9 | 1883.8 | 1883.8 |
| gdb 5886 | 1863.3 <sup>a</sup> | 1881.9 | 1875.1 | 1874.6 | 1867.2 | 1867.2 | 1866.1 | 1870.6 | 1870.6 | 1870.6 | 1869.3 | 1870.6 | 1869.3 | 1869.3 | 1869.3 |
| gdb 5887 | 1872.8 <sup>a</sup> | 1892.3 | 1887.9 | 1886.1 | 1877.4 | 1876.9 | 1879.7 | 1881.2 | 1881.2 | 1881.2 | 1882.8 | 1881.2 | 1882.8 | 1882.8 | 1882.8 |
| gdb 5888 | 1868.5 <sup>a</sup> | 1891.7 | 1886.8 | 1886.9 | 1886.3 | 1883.9 | 1880.2 | 1883.4 | 1883.4 | 1883.4 | 1881.9 | 1883.4 | 1881.9 | 1881.9 | 1881.9 |
| gdb 5889 | 1874.9 <sup>a</sup> | 1878.5 | 1884.9 | 1882.9 | 1879.4 | 1878.9 | 1876.6 | 1880.8 | 1880.7 | 1880.7 | 1881.7 | 1880.7 | 1881.7 | 1881.7 | 1881.7 |
| gdb 5890 | 1871.9 <sup>a</sup> | 1878.3 | 1881.9 | 1882.1 | 1875.5 | 1876.4 | 1878.5 | 1880.6 | 1880.5 | 1880.5 | 1880.4 | 1880.5 | 1880.4 | 1880.4 | 1880.4 |
| gdb 5891 | 1887.0 <sup>a</sup> | 1879.9 | 1883.9 | 1883.4 | 1884.6 | 1883.5 | 1880.2 | 1885.2 | 1885.2 | 1885.2 | 1882.0 | 1885.2 | 1882.0 | 1882.0 | 1882.0 |
| gdb 5892 | 1864.5 <sup>a</sup> | 1868.2 | 1870.8 | 1870.2 | 1865.8 | 1865.7 | 1863.7 | 1870.7 | 1870.6 | 1870.6 | 1867.5 | 1870.6 | 1867.5 | 1867.5 | 1867.5 |
| gdb 5893 | 1877.9 <sup>a</sup> | 1893.8 | 1893.1 | 1889.4 | 1886.3 | 1885.6 | 1881.2 | 1883.1 | 1883.1 | 1883.1 | 1886.3 | 1883.1 | 1886.3 | 1886.3 | 1886.3 |
| gdb 5894 | 1889.8 <sup>a</sup> | 1894.4 | 1892.5 | 1890.5 | 1891.8 | 1890.1 | 1884.9 | 1887.4 | 1887.3 | 1887.3 | 1886.5 | 1887.3 | 1886.5 | 1886.5 | 1886.5 |

. . . continued on next page . . .

Table S26: ... continued from previous page. ...

| Molecule | Ref.                | MNDO   | AMI    | PM3    | PM6    | PM7    | OM1    |        | OM2    |        | OM3    |        | OM3    |        | D3T    |
|----------|---------------------|--------|--------|--------|--------|--------|--------|--------|--------|--------|--------|--------|--------|--------|--------|
|          |                     |        |        |        |        |        | OM1    | OM2    | D2     | D3     | D3T    | D2     | D3     | D3T    |        |
| gdb 5895 | 1866.9 <sup>a</sup> | 1882.6 | 1879.0 | 1877.3 | 1872.4 | 1872.0 | 1868.2 | 1872.9 | 1872.8 | 1872.8 | 1872.8 | 1871.9 | 1871.9 | 1871.8 | 1871.8 |
| gdb 5896 | 1884.2 <sup>a</sup> | 1882.7 | 1886.9 | 1884.5 | 1884.3 | 1882.4 | 1881.7 | 1882.7 | 1882.7 | 1882.7 | 1882.7 | 1880.3 | 1880.3 | 1880.3 | 1880.3 |
| gdb 5897 | 1888.8 <sup>a</sup> | 1883.2 | 1889.4 | 1885.9 | 1888.1 | 1885.6 | 1883.3 | 1884.8 | 1884.8 | 1884.8 | 1884.8 | 1882.9 | 1882.8 | 1882.8 | 1882.8 |
| gdb 5898 | 1863.3 <sup>a</sup> | 1870.8 | 1874.7 | 1871.6 | 1867.8 | 1866.8 | 1865.9 | 1869.3 | 1869.3 | 1869.3 | 1869.3 | 1867.3 | 1867.3 | 1867.3 | 1867.3 |
| gdb 5899 | 1875.2 <sup>a</sup> | 1881.8 | 1889.1 | 1884.0 | 1880.8 | 1879.8 | 1878.8 | 1878.5 | 1878.5 | 1878.5 | 1878.5 | 1881.0 | 1880.9 | 1880.9 | 1880.9 |
| gdb 5900 | 1875.5 <sup>a</sup> | 1878.3 | 1884.9 | 1883.0 | 1879.8 | 1878.9 | 1876.0 | 1880.7 | 1880.7 | 1880.7 | 1880.7 | 1882.0 | 1881.9 | 1882.0 | 1882.0 |
| gdb 5901 | 1866.3 <sup>a</sup> | 1867.8 | 1868.9 | 1869.7 | 1869.7 | 1868.6 | 1869.1 | 1876.0 | 1873.5 | 1873.5 | 1873.5 | 1870.7 | 1870.7 | 1870.7 | 1870.7 |
| gdb 5902 | 1866.4 <sup>a</sup> | 1867.2 | 1871.8 | 1871.7 | 1872.2 | 1868.0 | 1865.2 | 1871.6 | 1871.6 | 1871.6 | 1871.6 | 1868.9 | 1868.8 | 1868.9 | 1868.9 |
| gdb 5903 | 1839.0 <sup>a</sup> | 1841.4 | 1835.9 | 1834.9 | 1837.5 | 1835.3 | 1837.8 | 1839.3 | 1839.3 | 1839.3 | 1839.3 | 1830.8 | 1830.8 | 1830.8 | 1830.8 |
| gdb 5904 | 1837.9 <sup>a</sup> | 1840.2 | 1839.2 | 1835.3 | 1836.3 | 1833.6 | 1834.0 | 1836.1 | 1836.1 | 1836.1 | 1836.1 | 1827.7 | 1827.6 | 1827.6 | 1827.6 |
| gdb 5905 | 1847.9 <sup>a</sup> | 1851.8 | 1851.0 | 1846.0 | 1845.4 | 1843.4 | 1846.7 | 1845.1 | 1845.1 | 1845.1 | 1845.1 | 1840.3 | 1840.3 | 1840.3 | 1840.3 |
| gdb 5906 | 1870.5 <sup>a</sup> | 1868.8 | 1877.8 | 1876.9 | 1867.1 | 1868.1 | 1871.0 | 1875.6 | 1875.6 | 1875.6 | 1875.6 | 1874.9 | 1874.9 | 1874.9 | 1874.9 |
| gdb 5907 | 1870.9 <sup>a</sup> | 1871.1 | 1876.6 | 1879.1 | 1868.5 | 1871.0 | 1874.3 | 1879.2 | 1879.2 | 1879.2 | 1879.2 | 1878.1 | 1878.1 | 1878.1 | 1878.1 |
| gdb 5908 | 1863.8 <sup>a</sup> | 1859.7 | 1863.4 | 1866.9 | 1861.9 | 1863.0 | 1864.3 | 1872.6 | 1872.6 | 1872.6 | 1872.6 | 1868.1 | 1868.1 | 1868.1 | 1868.1 |
| gdb 5909 | 1861.6 <sup>a</sup> | 1859.0 | 1866.6 | 1866.8 | 1858.2 | 1859.2 | 1859.6 | 1867.0 | 1867.0 | 1867.0 | 1867.0 | 1863.0 | 1862.9 | 1862.9 | 1862.9 |
| gdb 5910 | 1870.2 <sup>a</sup> | 1886.8 | 1887.6 | 1884.1 | 1872.7 | 1872.3 | 1876.0 | 1875.4 | 1875.4 | 1875.4 | 1875.4 | 1877.9 | 1877.9 | 1877.9 | 1877.9 |
| gdb 5911 | 1869.4 <sup>a</sup> | 1886.7 | 1885.8 | 1884.0 | 1871.6 | 1872.1 | 1878.0 | 1877.5 | 1877.5 | 1877.5 | 1877.5 | 1879.2 | 1879.2 | 1879.2 | 1879.2 |
| gdb 5912 | 1863.7 <sup>a</sup> | 1876.3 | 1872.0 | 1871.7 | 1863.7 | 1863.8 | 1869.8 | 1871.7 | 1871.7 | 1871.7 | 1871.7 | 1869.8 | 1869.8 | 1869.8 | 1869.8 |
| gdb 5913 | 1860.8 <sup>a</sup> | 1876.3 | 1874.9 | 1872.7 | 1862.3 | 1861.6 | 1865.0 | 1866.7 | 1866.7 | 1866.7 | 1866.7 | 1865.3 | 1865.3 | 1865.3 | 1865.3 |
| gdb 5914 | 1872.0 <sup>a</sup> | 1876.6 | 1882.3 | 1881.3 | 1874.0 | 1873.6 | 1873.6 | 1877.7 | 1877.6 | 1877.6 | 1877.6 | 1878.3 | 1878.3 | 1878.3 | 1878.3 |
| gdb 5915 | 1872.1 <sup>a</sup> | 1878.2 | 1879.9 | 1879.2 | 1870.5 | 1872.3 | 1876.9 | 1879.4 | 1879.4 | 1879.4 | 1879.4 | 1879.3 | 1879.3 | 1879.3 | 1879.3 |
| gdb 5916 | 1866.5 <sup>a</sup> | 1867.6 | 1867.1 | 1869.0 | 1864.8 | 1865.9 | 1867.4 | 1873.1 | 1873.1 | 1873.1 | 1873.1 | 1869.7 | 1869.7 | 1869.7 | 1869.7 |
| gdb 5917 | 1863.4 <sup>a</sup> | 1866.5 | 1869.6 | 1870.0 | 1863.5 | 1862.7 | 1863.3 | 1869.3 | 1869.3 | 1869.3 | 1869.3 | 1866.2 | 1866.1 | 1866.1 | 1866.1 |
| gdb 5918 | 1872.2 <sup>a</sup> | 1888.4 | 1890.1 | 1885.7 | 1876.3 | 1876.5 | 1877.3 | 1877.0 | 1877.0 | 1877.0 | 1877.0 | 1879.6 | 1879.6 | 1879.6 | 1879.6 |
| gdb 5919 | 1863.5 <sup>a</sup> | 1878.3 | 1873.9 | 1872.4 | 1866.2 | 1865.7 | 1870.1 | 1872.1 | 1869.5 | 1869.5 | 1869.5 | 1868.3 | 1868.3 | 1868.3 | 1868.3 |
| gdb 5920 | 1863.7 <sup>a</sup> | 1878.6 | 1877.4 | 1874.8 | 1865.6 | 1865.6 | 1867.1 | 1868.1 | 1868.1 | 1868.1 | 1868.1 | 1867.0 | 1867.0 | 1867.0 | 1867.0 |
| gdb 5921 | 1861.3 <sup>a</sup> | 1866.8 | 1870.8 | 1869.0 | 1862.2 | 1862.6 | 1866.8 | 1866.5 | 1866.5 | 1866.5 | 1866.5 | 1864.6 | 1864.6 | 1864.6 | 1864.6 |
| gdb 5922 | 1860.9 <sup>a</sup> | 1865.3 | 1874.2 | 1869.6 | 1861.6 | 1861.0 | 1864.3 | 1864.5 | 1864.5 | 1864.5 | 1864.5 | 1862.7 | 1862.7 | 1862.7 | 1862.7 |
| gdb 5923 | 1869.3 <sup>a</sup> | 1875.8 | 1884.4 | 1879.4 | 1868.8 | 1869.3 | 1875.1 | 1871.9 | 1871.9 | 1871.9 | 1871.9 | 1873.6 | 1873.6 | 1873.6 | 1873.6 |
| gdb 5924 | 1881.4 <sup>a</sup> | 1876.4 | 1884.9 | 1882.3 | 1879.2 | 1877.5 | 1879.1 | 1878.5 | 1878.5 | 1878.5 | 1878.5 | 1875.4 | 1875.4 | 1875.4 | 1875.4 |
| gdb 5925 | 1862.4 <sup>a</sup> | 1866.7 | 1870.7 | 1868.9 | 1863.9 | 1863.8 | 1868.9 | 1869.3 | 1869.3 | 1869.3 | 1869.3 | 1867.1 | 1867.1 | 1867.1 | 1867.1 |
| gdb 5926 | 1859.2 <sup>a</sup> | 1865.1 | 1872.7 | 1869.2 | 1861.9 | 1860.0 | 1862.0 | 1863.3 | 1863.3 | 1863.3 | 1863.3 | 1861.8 | 1861.8 | 1861.8 | 1861.8 |
| gdb 5927 | 1870.3 <sup>a</sup> | 1875.2 | 1885.3 | 1880.1 | 1871.2 | 1871.0 | 1873.6 | 1872.3 | 1872.2 | 1872.2 | 1872.2 | 1874.6 | 1874.5 | 1874.5 | 1874.5 |
| gdb 5928 | 1852.5 <sup>a</sup> | 1853.4 | 1850.3 | 1851.5 | 1852.1 | 1850.1 | 1843.5 | 1846.9 | 1846.8 | 1846.8 | 1846.8 | 1842.6 | 1842.5 | 1842.5 | 1842.5 |
| gdb 5929 | 1843.3 <sup>a</sup> | 1843.5 | 1837.0 | 1839.6 | 1840.1 | 1837.8 | 1832.0 | 1837.8 | 1837.8 | 1837.8 | 1837.8 | 1829.5 | 1829.5 | 1829.4 | 1829.4 |
| gdb 5930 | 1847.0 <sup>a</sup> | 1854.2 | 1850.7 | 1849.1 | 1851.7 | 1846.0 | 1840.8 | 1843.1 | 1843.1 | 1843.1 | 1843.1 | 1840.7 | 1840.7 | 1840.7 | 1840.7 |
| gdb 5931 | 1856.2 <sup>a</sup> | 1866.2 | 1864.3 | 1861.8 | 1863.9 | 1858.4 | 1852.0 | 1851.3 | 1851.3 | 1851.3 | 1851.3 | 1853.2 | 1853.2 | 1853.2 | 1853.2 |
| gdb 5932 | 1841.6 <sup>a</sup> | 1842.2 | 1839.0 | 1838.3 | 1842.0 | 1836.1 | 1833.3 | 1837.1 | 1837.1 | 1837.1 | 1837.1 | 1829.0 | 1829.0 | 1829.0 | 1829.0 |
| gdb 5933 | 1850.1 <sup>a</sup> | 1852.2 | 1851.7 | 1850.3 | 1850.0 | 1847.7 | 1844.2 | 1845.1 | 1845.1 | 1845.1 | 1845.1 | 1841.4 | 1841.4 | 1841.3 | 1841.3 |
| gdb 5934 | 1852.7 <sup>a</sup> | 1864.8 | 1855.3 | 1853.8 | 1854.0 | 1852.1 | 1846.0 | 1848.9 | 1848.9 | 1848.9 | 1848.9 | 1845.5 | 1845.4 | 1845.4 | 1845.4 |
| gdb 5935 | 1841.4 <sup>a</sup> | 1853.5 | 1840.1 | 1841.1 | 1843.4 | 1838.5 | 1832.4 | 1837.0 | 1837.0 | 1837.0 | 1837.0 | 1830.0 | 1830.0 | 1830.0 | 1830.0 |
| gdb 5936 | 1853.1 <sup>a</sup> | 1855.0 | 1848.1 | 1849.2 | 1851.4 | 1848.0 | 1845.0 | 1847.2 | 1847.2 | 1847.2 | 1847.2 | 1842.4 | 1842.4 | 1842.4 | 1842.4 |
| gdb 5937 | 1845.5 <sup>a</sup> | 1854.6 | 1848.4 | 1849.2 | 1852.0 | 1847.7 | 1840.2 | 1841.1 | 1841.1 | 1841.1 | 1841.1 | 1839.9 | 1839.8 | 1839.8 | 1839.8 |
| gdb 5938 | 1845.4 <sup>a</sup> | 1855.4 | 1851.2 | 1848.4 | 1854.8 | 1845.8 | 1840.7 | 1842.0 | 1842.0 | 1842.0 | 1842.0 | 1839.8 | 1839.8 | 1839.8 | 1839.8 |
| gdb 5939 | 1842.6 <sup>a</sup> | 1843.6 | 1836.5 | 1839.0 | 1839.4 | 1837.7 | 1832.2 | 1838.3 | 1838.3 | 1838.3 | 1838.3 | 1829.9 | 1829.9 | 1829.9 | 1829.9 |

... continued on next page ...

Table S26: ... continued from previous page. ...

| Molecule | Ref.                | MNDO   | AMI    | PM3    | PM6    | PM7    | OM1    | OM2    |        | OM3    |        | D3T    | OM3    | D3     | D3T    |
|----------|---------------------|--------|--------|--------|--------|--------|--------|--------|--------|--------|--------|--------|--------|--------|--------|
|          |                     |        |        |        |        |        |        | D2     | D3     | D2     | D3     |        |        |        |        |
| gdb 5940 | 1858.3 <sup>a</sup> | 1865.7 | 1863.6 | 1859.9 | 1864.8 | 1858.9 | 1853.7 | 1852.6 | 1852.6 | 1853.7 | 1853.7 | 1853.7 | 1853.7 | 1853.7 | 1853.7 |
| gdb 5941 | 1841.7 <sup>a</sup> | 1856.7 | 1845.8 | 1849.0 | 1850.7 | 1844.9 | 1836.9 | 1843.1 | 1843.1 | 1835.3 | 1835.3 | 1835.3 | 1835.3 | 1835.3 | 1835.3 |
| gdb 5942 | 1839.3 <sup>a</sup> | 1854.8 | 1845.7 | 1849.5 | 1852.0 | 1844.6 | 1834.4 | 1839.6 | 1839.6 | 1832.4 | 1832.4 | 1832.4 | 1832.4 | 1832.4 | 1832.4 |
| gdb 5943 | 1839.1 <sup>a</sup> | 1855.6 | 1847.9 | 1848.4 | 1847.9 | 1841.0 | 1832.2 | 1836.6 | 1836.6 | 1829.7 | 1829.7 | 1829.7 | 1829.7 | 1829.7 | 1829.7 |
| gdb 5944 | 1850.6 <sup>a</sup> | 1865.1 | 1858.3 | 1860.2 | 1861.9 | 1855.0 | 1846.3 | 1849.5 | 1849.5 | 1846.2 | 1846.2 | 1846.2 | 1846.2 | 1846.2 | 1846.2 |
| gdb 5945 | 1848.6 <sup>a</sup> | 1865.9 | 1860.1 | 1858.8 | 1858.1 | 1851.3 | 1844.8 | 1846.3 | 1846.3 | 1842.8 | 1842.8 | 1842.8 | 1842.8 | 1842.8 | 1842.8 |
| gdb 5946 | 1834.1 <sup>a</sup> | 1840.0 | 1803.9 | 1823.3 | 1836.6 | 1823.2 | 1814.1 | 1818.7 | 1818.7 | 1816.3 | 1816.3 | 1816.3 | 1816.3 | 1816.3 | 1816.3 |
| gdb 5947 | 1832.8 <sup>a</sup> | 1841.1 | 1807.7 | 1824.2 | 1837.5 | 1822.9 | 1813.1 | 1816.8 | 1816.7 | 1814.3 | 1814.3 | 1814.3 | 1814.3 | 1814.3 | 1814.3 |
| gdb 5948 | 1842.6 <sup>a</sup> | 1852.7 | 1820.6 | 1834.7 | 1848.2 | 1834.4 | 1826.0 | 1826.4 | 1826.4 | 1827.1 | 1827.1 | 1827.1 | 1827.1 | 1827.1 | 1827.1 |
| gdb 5949 | 1855.8 <sup>a</sup> | 1844.4 | 1814.7 | 1835.5 | 1849.3 | 1836.0 | 1836.2 | 1844.5 | 1844.5 | 1844.0 | 1844.0 | 1844.0 | 1844.0 | 1844.0 | 1844.0 |
| gdb 5950 | 1863.0 <sup>a</sup> | 1850.4 | 1816.8 | 1837.2 | 1848.0 | 1835.9 | 1839.3 | 1844.2 | 1844.2 | 1845.2 | 1845.2 | 1845.2 | 1845.2 | 1845.2 | 1845.2 |
| gdb 5951 | 1858.0 <sup>a</sup> | 1850.5 | 1819.7 | 1837.2 | 1847.4 | 1833.7 | 1835.5 | 1840.4 | 1840.4 | 1841.6 | 1841.6 | 1841.6 | 1841.6 | 1841.6 | 1841.6 |
| gdb 5952 | 1867.6 <sup>a</sup> | 1860.9 | 1833.3 | 1848.7 | 1859.3 | 1846.1 | 1846.7 | 1849.6 | 1849.6 | 1854.5 | 1854.5 | 1854.5 | 1854.5 | 1854.5 | 1854.5 |
| gdb 5953 | 1849.2 <sup>a</sup> | 1842.9 | 1825.9 | 1836.9 | 1850.3 | 1841.1 | 1835.7 | 1848.2 | 1848.2 | 1841.2 | 1841.2 | 1841.2 | 1841.2 | 1841.2 | 1841.2 |
| gdb 5954 | 1859.9 <sup>a</sup> | 1853.7 | 1840.0 | 1849.4 | 1863.3 | 1854.2 | 1848.0 | 1858.0 | 1858.0 | 1855.2 | 1855.2 | 1855.2 | 1855.2 | 1855.2 | 1855.2 |
| gdb 5955 | 1874.1 <sup>a</sup> | 1872.7 | 1851.7 | 1866.7 | 1871.3 | 1867.5 | 1863.9 | 1868.6 | 1868.6 | 1866.6 | 1866.6 | 1866.6 | 1866.6 | 1866.6 | 1866.6 |
| gdb 5956 | 1889.6 <sup>a</sup> | 1876.8 | 1854.7 | 1870.4 | 1881.0 | 1872.1 | 1865.4 | 1866.9 | 1866.9 | 1868.4 | 1868.4 | 1868.4 | 1868.4 | 1868.4 | 1868.4 |
| gdb 5957 | 1872.2 <sup>a</sup> | 1875.4 | 1853.5 | 1866.7 | 1874.9 | 1866.9 | 1863.4 | 1866.6 | 1866.6 | 1867.9 | 1867.9 | 1867.9 | 1867.9 | 1867.9 | 1867.9 |
| gdb 5958 | 1870.6 <sup>a</sup> | 1875.7 | 1857.5 | 1867.6 | 1874.7 | 1865.3 | 1860.7 | 1864.7 | 1864.7 | 1865.7 | 1865.7 | 1865.7 | 1865.7 | 1865.7 | 1865.7 |
| gdb 5959 | 1880.1 <sup>a</sup> | 1886.9 | 1871.7 | 1879.7 | 1886.8 | 1877.7 | 1872.8 | 1874.4 | 1874.4 | 1878.3 | 1878.3 | 1878.3 | 1878.3 | 1878.3 | 1878.3 |
| gdb 5960 | 1827.7 <sup>a</sup> | 1825.4 | 1799.6 | 1814.6 | 1823.2 | 1820.8 | 1814.0 | 1817.9 | 1817.9 | 1809.5 | 1809.5 | 1809.5 | 1809.5 | 1809.5 | 1809.5 |
| gdb 5961 | 1826.1 <sup>a</sup> | 1827.3 | 1801.7 | 1814.7 | 1829.2 | 1821.8 | 1815.6 | 1818.6 | 1818.6 | 1813.2 | 1813.2 | 1813.2 | 1813.2 | 1813.2 | 1813.2 |
| gdb 5962 | 1825.0 <sup>a</sup> | 1827.2 | 1805.8 | 1815.4 | 1829.5 | 1820.5 | 1813.5 | 1817.1 | 1817.1 | 1810.7 | 1810.7 | 1810.7 | 1810.7 | 1810.7 | 1810.7 |
| gdb 5963 | 1825.8 <sup>a</sup> | 1827.9 | 1804.6 | 1815.1 | 1829.2 | 1820.8 | 1814.5 | 1818.4 | 1818.4 | 1811.9 | 1811.9 | 1811.9 | 1811.9 | 1811.9 | 1811.9 |
| gdb 5964 | 1833.8 <sup>a</sup> | 1838.4 | 1819.7 | 1827.4 | 1841.3 | 1832.6 | 1824.8 | 1826.0 | 1826.0 | 1823.4 | 1823.4 | 1823.4 | 1823.4 | 1823.4 | 1823.4 |
| gdb 5965 | 1836.8 <sup>a</sup> | 1839.5 | 1817.6 | 1825.7 | 1842.3 | 1832.6 | 1828.2 | 1828.6 | 1828.6 | 1825.5 | 1825.5 | 1825.5 | 1825.5 | 1825.5 | 1825.5 |
| gdb 5966 | 1870.4 <sup>a</sup> | 1870.3 | 1860.4 | 1863.4 | 1868.6 | 1866.4 | 1861.6 | 1866.3 | 1866.3 | 1858.6 | 1858.6 | 1858.6 | 1858.6 | 1858.6 | 1858.6 |
| gdb 5967 | 1880.7 <sup>a</sup> | 1881.6 | 1874.5 | 1875.9 | 1880.9 | 1879.0 | 1874.0 | 1876.1 | 1876.1 | 1872.4 | 1872.4 | 1872.4 | 1872.4 | 1872.4 | 1872.4 |
| gdb 5968 | 1887.1 <sup>a</sup> | 1877.7 | 1855.9 | 1870.5 | 1879.5 | 1870.6 | 1864.5 | 1865.5 | 1865.5 | 1866.7 | 1866.7 | 1866.7 | 1866.7 | 1866.7 | 1866.7 |
| gdb 5969 | 1874.6 <sup>a</sup> | 1873.1 | 1851.8 | 1866.5 | 1870.9 | 1867.5 | 1865.1 | 1869.3 | 1869.3 | 1867.0 | 1867.0 | 1867.0 | 1867.0 | 1867.0 | 1867.0 |
| gdb 5970 | 1872.1 <sup>a</sup> | 1876.0 | 1853.3 | 1866.3 | 1872.5 | 1865.7 | 1864.3 | 1867.0 | 1867.0 | 1867.8 | 1867.8 | 1867.8 | 1867.8 | 1867.8 | 1867.8 |
| gdb 5971 | 1870.6 <sup>a</sup> | 1876.2 | 1858.4 | 1867.4 | 1874.4 | 1865.4 | 1863.0 | 1866.3 | 1866.3 | 1866.1 | 1866.1 | 1866.1 | 1866.1 | 1866.1 | 1866.1 |
| gdb 5972 | 1880.8 <sup>a</sup> | 1887.6 | 1871.9 | 1879.5 | 1886.3 | 1877.7 | 1874.1 | 1875.1 | 1875.1 | 1878.7 | 1878.7 | 1878.7 | 1878.7 | 1878.7 | 1878.7 |
| gdb 5973 | 1869.5 <sup>a</sup> | 1870.9 | 1860.6 | 1863.7 | 1868.1 | 1866.3 | 1862.1 | 1866.9 | 1866.9 | 1859.2 | 1859.2 | 1859.2 | 1859.2 | 1859.2 | 1859.2 |
| gdb 5974 | 1880.3 <sup>a</sup> | 1881.8 | 1872.7 | 1873.8 | 1878.7 | 1877.3 | 1875.0 | 1876.2 | 1876.2 | 1871.9 | 1871.9 | 1871.9 | 1871.9 | 1871.9 | 1871.9 |
| gdb 5975 | 1834.9 <sup>a</sup> | 1837.2 | 1806.0 | 1823.6 | 1838.0 | 1824.1 | 1814.1 | 1819.7 | 1819.7 | 1816.5 | 1816.5 | 1816.5 | 1816.5 | 1816.5 | 1816.5 |
| gdb 5976 | 1845.4 <sup>a</sup> | 1848.5 | 1820.2 | 1835.9 | 1851.2 | 1837.2 | 1829.9 | 1829.9 | 1829.9 | 1830.7 | 1830.7 | 1830.7 | 1830.7 | 1830.7 | 1830.7 |
| gdb 5977 | 1820.3 <sup>a</sup> | 1822.6 | 1776.1 | 1799.4 | 1818.2 | 1800.3 | 1793.8 | 1800.6 | 1800.6 | 1797.1 | 1797.1 | 1797.1 | 1797.1 | 1797.1 | 1797.1 |
| gdb 5978 | 1825.1 <sup>a</sup> | 1823.2 | 1776.9 | 1799.6 | 1818.7 | 1800.1 | 1797.6 | 1801.9 | 1801.9 | 1798.8 | 1798.8 | 1798.8 | 1798.8 | 1798.8 | 1798.8 |
| gdb 5979 | 1819.2 <sup>a</sup> | 1822.0 | 1778.4 | 1798.8 | 1816.1 | 1796.4 | 1792.6 | 1796.1 | 1796.1 | 1793.6 | 1793.6 | 1793.6 | 1793.6 | 1793.6 | 1793.6 |
| gdb 5980 | 1819.9 <sup>a</sup> | 1820.8 | 1776.8 | 1798.0 | 1815.5 | 1796.7 | 1792.6 | 1796.7 | 1796.7 | 1794.1 | 1794.1 | 1794.1 | 1794.1 | 1794.1 | 1794.1 |
| gdb 5981 | 1829.2 <sup>a</sup> | 1832.4 | 1790.8 | 1808.6 | 1827.1 | 1808.1 | 1806.0 | 1806.2 | 1806.2 | 1807.0 | 1807.0 | 1807.0 | 1807.0 | 1807.0 | 1807.0 |
| gdb 5982 | 1831.4 <sup>a</sup> | 1832.6 | 1791.5 | 1810.8 | 1829.2 | 1810.5 | 1805.6 | 1807.3 | 1807.3 | 1808.8 | 1808.8 | 1808.8 | 1808.8 | 1808.8 | 1808.8 |
| gdb 5983 | 1834.6 <sup>a</sup> | 1838.6 | 1802.9 | 1823.0 | 1837.1 | 1824.0 | 1813.8 | 1817.3 | 1817.3 | 1815.6 | 1815.6 | 1815.6 | 1815.6 | 1815.6 | 1815.6 |
| gdb 5984 | 1832.5 <sup>a</sup> | 1839.3 | 1807.6 | 1823.9 | 1837.8 | 1823.3 | 1813.1 | 1817.2 | 1817.2 | 1814.4 | 1814.4 | 1814.4 | 1814.4 | 1814.4 | 1814.4 |

... continued on next page ...



Table S26: ... continued from previous page. ...

| Molecule | Ref.                | MNDO   | AMI    | PM3    | PM6    | PM7    | OM1    | OM2    |        | OM3    |        | D3T    |
|----------|---------------------|--------|--------|--------|--------|--------|--------|--------|--------|--------|--------|--------|
|          |                     |        |        |        |        |        |        | D2     | D3     | D2     | D3     |        |
| gdb 5985 | 1833.5 <sup>a</sup> | 1838.7 | 1806.0 | 1823.2 | 1837.1 | 1823.5 | 1813.2 | 1817.8 | 1817.8 | 1815.2 | 1815.2 | 1815.2 |
| gdb 5986 | 1842.1 <sup>a</sup> | 1850.3 | 1821.3 | 1835.9 | 1849.7 | 1835.4 | 1823.8 | 1825.6 | 1825.6 | 1826.8 | 1826.8 | 1826.8 |
| gdb 5987 | 1844.9 <sup>a</sup> | 1850.3 | 1820.4 | 1835.6 | 1850.4 | 1836.7 | 1825.6 | 1827.7 | 1827.7 | 1829.0 | 1829.0 | 1829.0 |
| gdb 5988 | 1920.4 <sup>a</sup> | 1916.7 | 1912.1 | 1916.2 | 1917.4 | 1914.0 | 1910.7 | 1915.0 | 1915.0 | 1913.8 | 1913.7 | 1913.7 |
| gdb 5989 | 1900.5 <sup>a</sup> | 1908.2 | 1905.6 | 1905.4 | 1906.5 | 1904.2 | 1900.3 | 1905.3 | 1905.3 | 1904.2 | 1904.2 | 1904.2 |
| gdb 5990 | 1910.3 <sup>a</sup> | 1919.8 | 1919.0 | 1917.7 | 1918.0 | 1915.5 | 1911.5 | 1914.1 | 1914.1 | 1916.6 | 1916.6 | 1916.6 |
| gdb 5991 | 1847.3 <sup>a</sup> | 1847.8 | 1829.9 | 1839.3 | 1851.8 | 1842.7 | 1836.9 | 1847.5 | 1847.5 | 1841.4 | 1841.4 | 1841.4 |
| gdb 5992 | 1857.7 <sup>a</sup> | 1859.7 | 1842.5 | 1849.9 | 1862.1 | 1853.5 | 1850.0 | 1857.0 | 1857.0 | 1854.2 | 1854.2 | 1854.2 |
| gdb 5993 | 1869.4 <sup>a</sup> | 1873.2 | 1864.0 | 1865.3 | 1870.2 | 1868.0 | 1863.8 | 1867.3 | 1867.3 | 1860.1 | 1860.1 | 1860.1 |
| gdb 5994 | 1879.0 <sup>a</sup> | 1884.7 | 1877.8 | 1877.6 | 1882.2 | 1880.0 | 1875.2 | 1876.6 | 1876.6 | 1873.1 | 1873.1 | 1873.1 |
| gdb 5995 | 1896.6 <sup>a</sup> | 1908.6 | 1905.8 | 1906.5 | 1907.0 | 1905.1 | 1899.8 | 1904.7 | 1904.7 | 1903.9 | 1903.9 | 1903.9 |
| gdb 5996 | 1906.5 <sup>a</sup> | 1920.3 | 1918.1 | 1917.0 | 1917.0 | 1915.7 | 1912.4 | 1913.9 | 1913.9 | 1916.4 | 1916.4 | 1916.4 |
| gdb 5997 | 1868.7 <sup>a</sup> | 1873.9 | 1863.9 | 1865.4 | 1869.4 | 1867.2 | 1863.6 | 1867.3 | 1867.3 | 1859.8 | 1859.8 | 1859.8 |
| gdb 5998 | 1879.4 <sup>a</sup> | 1885.6 | 1876.5 | 1875.9 | 1879.8 | 1878.3 | 1876.9 | 1877.0 | 1877.0 | 1873.0 | 1872.9 | 1872.9 |
| gdb 5999 | 1920.9 <sup>a</sup> | 1916.6 | 1911.5 | 1915.3 | 1915.6 | 1912.9 | 1910.4 | 1914.6 | 1914.6 | 1913.0 | 1913.0 | 1913.0 |
| gdb 6000 | 1901.0 <sup>a</sup> | 1908.7 | 1905.8 | 1905.5 | 1904.9 | 1903.2 | 1901.0 | 1905.0 | 1905.0 | 1903.9 | 1903.9 | 1903.9 |
| gdb 6001 | 1910.6 <sup>a</sup> | 1919.8 | 1918.5 | 1916.6 | 1915.7 | 1914.2 | 1911.3 | 1913.4 | 1913.4 | 1915.8 | 1915.8 | 1915.8 |
| gdb 6002 | 1845.0 <sup>a</sup> | 1858.5 | 1853.5 | 1851.0 | 1852.7 | 1847.5 | 1842.6 | 1840.2 | 1840.2 | 1839.4 | 1839.4 | 1839.4 |
| gdb 6003 | 1843.1 <sup>a</sup> | 1869.2 | 1853.6 | 1849.3 | 1849.9 | 1843.3 | 1842.1 | 1839.3 | 1839.3 | 1838.4 | 1838.4 | 1838.4 |
| gdb 6004 | 1853.4 <sup>a</sup> | 1869.5 | 1866.9 | 1860.8 | 1860.7 | 1855.1 | 1853.9 | 1848.5 | 1848.5 | 1851.3 | 1851.3 | 1851.3 |
| gdb 6005 | 1837.2 <sup>a</sup> | 1836.5 | 1804.8 | 1821.4 | 1839.7 | 1823.3 | 1816.5 | 1818.7 | 1818.8 | 1816.0 | 1815.9 | 1815.9 |
| gdb 6006 | 1831.4 <sup>a</sup> | 1834.3 | 1807.6 | 1822.1 | 1836.6 | 1821.8 | 1812.6 | 1816.2 | 1816.2 | 1813.4 | 1813.4 | 1813.4 |
| gdb 6007 | 1840.6 <sup>a</sup> | 1845.3 | 1819.2 | 1832.0 | 1845.4 | 1832.4 | 1825.2 | 1825.0 | 1825.0 | 1825.7 | 1825.7 | 1825.7 |
| gdb 6008 | 1821.8 <sup>a</sup> | 1818.8 | 1776.6 | 1797.0 | 1815.9 | 1798.4 | 1796.8 | 1797.7 | 1797.7 | 1795.5 | 1795.5 | 1795.5 |
| gdb 6009 | 1816.8 <sup>a</sup> | 1817.5 | 1779.1 | 1797.1 | 1814.8 | 1794.9 | 1791.5 | 1793.6 | 1793.6 | 1791.4 | 1791.4 | 1791.4 |
| gdb 6010 | 1825.8 <sup>a</sup> | 1828.3 | 1792.0 | 1808.6 | 1825.2 | 1806.4 | 1802.8 | 1802.2 | 1802.2 | 1804.0 | 1804.0 | 1804.0 |
| gdb 6011 | 1824.0 <sup>a</sup> | 1825.7 | 1804.5 | 1814.3 | 1830.1 | 1822.5 | 1817.4 | 1817.5 | 1817.5 | 1811.9 | 1811.9 | 1811.9 |
| gdb 6012 | 1822.4 <sup>a</sup> | 1824.9 | 1806.9 | 1814.4 | 1828.3 | 1819.1 | 1813.4 | 1815.0 | 1815.0 | 1808.8 | 1808.8 | 1808.8 |
| gdb 6013 | 1832.1 <sup>a</sup> | 1836.4 | 1820.6 | 1826.4 | 1840.2 | 1831.6 | 1825.9 | 1824.7 | 1824.7 | 1822.4 | 1822.4 | 1822.4 |
| gdb 6014 | 1885.7 <sup>a</sup> | 1874.8 | 1856.5 | 1869.8 | 1878.3 | 1869.4 | 1864.5 | 1863.3 | 1863.3 | 1864.8 | 1864.8 | 1864.8 |
| gdb 6015 | 1871.0 <sup>a</sup> | 1874.3 | 1856.4 | 1866.7 | 1875.0 | 1867.1 | 1865.2 | 1865.9 | 1865.9 | 1866.7 | 1866.7 | 1866.7 |
| gdb 6016 | 1869.0 <sup>a</sup> | 1874.1 | 1859.3 | 1867.1 | 1873.9 | 1864.3 | 1862.0 | 1863.8 | 1863.8 | 1864.0 | 1864.0 | 1864.0 |
| gdb 6017 | 1878.3 <sup>a</sup> | 1885.3 | 1872.5 | 1878.7 | 1884.9 | 1876.3 | 1873.7 | 1872.8 | 1872.8 | 1877.0 | 1877.0 | 1877.0 |
| gdb 6018 | 1850.8 <sup>a</sup> | 1840.0 | 1815.3 | 1833.0 | 1845.8 | 1832.3 | 1833.3 | 1839.1 | 1839.1 | 1839.0 | 1839.0 | 1839.0 |
| gdb 6019 | 1861.8 <sup>a</sup> | 1847.3 | 1818.1 | 1835.5 | 1848.4 | 1837.1 | 1840.3 | 1842.6 | 1842.6 | 1844.0 | 1844.0 | 1844.0 |
| gdb 6020 | 1856.5 <sup>a</sup> | 1845.2 | 1820.3 | 1834.9 | 1846.7 | 1832.7 | 1834.3 | 1838.6 | 1838.6 | 1840.0 | 1839.9 | 1839.9 |
| gdb 6021 | 1865.8 <sup>a</sup> | 1856.1 | 1833.2 | 1846.5 | 1857.2 | 1844.2 | 1845.7 | 1847.1 | 1847.1 | 1852.5 | 1852.5 | 1852.5 |
| gdb 6022 | 1850.2 <sup>a</sup> | 1844.0 | 1826.8 | 1836.6 | 1848.0 | 1841.7 | 1839.3 | 1849.0 | 1849.0 | 1841.7 | 1841.7 | 1841.7 |
| gdb 6023 | 1846.6 <sup>a</sup> | 1841.9 | 1828.7 | 1836.5 | 1849.5 | 1840.3 | 1836.6 | 1846.0 | 1846.0 | 1839.6 | 1839.6 | 1839.6 |
| gdb 6024 | 1855.5 <sup>a</sup> | 1852.5 | 1839.7 | 1845.9 | 1859.9 | 1849.7 | 1848.5 | 1854.4 | 1854.4 | 1851.3 | 1851.3 | 1851.3 |
| gdb 6025 | 1869.7 <sup>a</sup> | 1868.6 | 1851.9 | 1864.2 | 1867.2 | 1864.0 | 1864.0 | 1866.6 | 1866.6 | 1864.0 | 1864.0 | 1864.0 |
| gdb 6026 | 1871.6 <sup>a</sup> | 1874.3 | 1855.3 | 1865.0 | 1871.8 | 1865.5 | 1867.8 | 1869.6 | 1869.6 | 1868.8 | 1868.7 | 1868.7 |
| gdb 6027 | 1869.4 <sup>a</sup> | 1872.8 | 1858.5 | 1866.0 | 1872.8 | 1864.0 | 1863.5 | 1865.9 | 1865.9 | 1865.4 | 1865.4 | 1865.4 |
| gdb 6028 | 1878.5 <sup>a</sup> | 1883.4 | 1871.4 | 1877.3 | 1883.8 | 1875.7 | 1875.0 | 1874.9 | 1874.9 | 1878.2 | 1878.2 | 1878.2 |
| gdb 6029 | 1867.9 <sup>a</sup> | 1867.3 | 1856.7 | 1859.2 | 1869.3 | 1863.8 | 1863.1 | 1865.6 | 1865.6 | 1857.6 | 1857.6 | 1857.6 |

... continued on next page ...

Table S26: . . . continued from previous page. . . .

| Molecule | Ref.                | MNDO   | AMI    | PM3    | PM6    | PM7    | OM1    |        | OM2    |        | OM3    |        | OM3    | D3     | D3T    |
|----------|---------------------|--------|--------|--------|--------|--------|--------|--------|--------|--------|--------|--------|--------|--------|--------|
|          |                     |        |        |        |        |        | OM1    | OM2    | OM2    | OM3    | OM3    | D2     |        |        |        |
| gdb 6030 | 1868.3 <sup>a</sup> | 1867.2 | 1862.2 | 1862.0 | 1867.1 | 1864.8 | 1862.6 | 1865.7 | 1865.7 | 1865.7 | 1865.7 | 1857.7 | 1857.7 | 1857.7 | 1857.7 |
| gdb 6031 | 1876.4 <sup>a</sup> | 1877.5 | 1874.6 | 1873.4 | 1877.3 | 1875.5 | 1872.8 | 1873.4 | 1873.4 | 1873.4 | 1873.4 | 1869.6 | 1869.6 | 1869.6 | 1869.6 |
| gdb 6032 | 1895.8 <sup>a</sup> | 1903.2 | 1899.5 | 1900.5 | 1902.1 | 1901.9 | 1900.8 | 1904.2 | 1904.2 | 1904.2 | 1904.2 | 1902.5 | 1902.5 | 1902.5 | 1902.5 |
| gdb 6033 | 1895.8 <sup>a</sup> | 1902.8 | 1903.5 | 1902.5 | 1903.3 | 1901.4 | 1898.9 | 1903.0 | 1903.0 | 1903.0 | 1903.0 | 1901.5 | 1901.5 | 1901.5 | 1901.5 |
| gdb 6034 | 1904.2 <sup>a</sup> | 1913.0 | 1914.6 | 1911.7 | 1914.0 | 1912.6 | 1911.0 | 1911.6 | 1911.5 | 1911.5 | 1911.5 | 1913.3 | 1913.3 | 1913.3 | 1913.3 |
| gdb 6035 | 1920.4 <sup>a</sup> | 1909.9 | 1908.0 | 1911.8 | 1913.7 | 1911.3 | 1910.6 | 1914.3 | 1914.3 | 1914.3 | 1914.3 | 1912.5 | 1912.5 | 1912.5 | 1912.5 |
| gdb 6036 | 1901.8 <sup>a</sup> | 1902.5 | 1900.4 | 1901.3 | 1904.2 | 1902.5 | 1899.8 | 1905.8 | 1905.8 | 1905.8 | 1905.8 | 1904.3 | 1904.3 | 1904.3 | 1904.3 |
| gdb 6037 | 1899.2 <sup>a</sup> | 1902.1 | 1903.3 | 1902.3 | 1902.3 | 1899.8 | 1898.2 | 1902.5 | 1902.5 | 1902.5 | 1902.5 | 1900.9 | 1900.9 | 1900.9 | 1900.9 |
| gdb 6038 | 1807.5 <sup>a</sup> | 1912.3 | 1915.7 | 1913.3 | 1912.4 | 1910.5 | 1908.3 | 1910.1 | 1910.1 | 1910.1 | 1910.1 | 1912.6 | 1912.6 | 1912.6 | 1912.6 |
| gdb 6039 | 1840.4 <sup>a</sup> | 1858.5 | 1848.8 | 1850.2 | 1851.7 | 1843.9 | 1837.5 | 1838.9 | 1838.8 | 1838.8 | 1838.8 | 1832.6 | 1832.6 | 1832.6 | 1832.6 |
| gdb 6040 | 1850.3 <sup>a</sup> | 1869.2 | 1861.8 | 1861.8 | 1862.8 | 1855.9 | 1849.3 | 1848.1 | 1848.0 | 1848.0 | 1848.0 | 1846.1 | 1846.0 | 1846.0 | 1846.0 |
| gdb 6041 | 1853.1 <sup>a</sup> | 1855.8 | 1850.7 | 1851.8 | 1851.9 | 1849.9 | 1844.0 | 1847.2 | 1847.2 | 1847.2 | 1847.2 | 1843.2 | 1843.2 | 1843.2 | 1843.2 |
| gdb 6042 | 1844.4 <sup>a</sup> | 1854.9 | 1844.6 | 1847.1 | 1848.1 | 1844.5 | 1840.4 | 1841.2 | 1841.2 | 1841.2 | 1841.2 | 1840.2 | 1840.2 | 1840.2 | 1840.2 |
| gdb 6043 | 1844.6 <sup>a</sup> | 1855.8 | 1849.1 | 1848.7 | 1849.4 | 1844.2 | 1840.0 | 1841.8 | 1841.8 | 1841.8 | 1841.8 | 1839.9 | 1839.9 | 1839.9 | 1839.9 |
| gdb 6044 | 1842.5 <sup>a</sup> | 1844.2 | 1837.5 | 1840.0 | 1840.6 | 1837.9 | 1831.7 | 1837.7 | 1837.7 | 1837.7 | 1837.7 | 1829.6 | 1829.6 | 1829.6 | 1829.6 |
| gdb 6045 | 1856.5 <sup>a</sup> | 1866.7 | 1861.4 | 1858.7 | 1861.0 | 1857.1 | 1853.3 | 1852.0 | 1852.0 | 1852.0 | 1852.0 | 1853.4 | 1853.4 | 1853.4 | 1853.4 |
| gdb 6046 | 1852.2 <sup>a</sup> | 1868.3 | 1858.8 | 1855.5 | 1855.2 | 1853.0 | 1849.6 | 1848.1 | 1848.1 | 1848.1 | 1848.1 | 1845.7 | 1845.7 | 1845.7 | 1845.7 |
| gdb 6047 | 1841.6 <sup>a</sup> | 1856.7 | 1845.5 | 1843.7 | 1843.5 | 1840.6 | 1836.8 | 1838.6 | 1838.6 | 1838.6 | 1838.6 | 1831.9 | 1831.9 | 1831.9 | 1831.9 |
| gdb 6048 | 1840.2 <sup>a</sup> | 1846.7 | 1842.9 | 1840.5 | 1840.3 | 1837.0 | 1836.1 | 1836.2 | 1836.2 | 1836.2 | 1836.2 | 1829.0 | 1829.0 | 1829.0 | 1829.0 |
| gdb 6049 | 1850.8 <sup>a</sup> | 1858.4 | 1854.5 | 1850.5 | 1851.8 | 1847.6 | 1850.0 | 1846.0 | 1846.0 | 1846.0 | 1846.0 | 1842.4 | 1842.4 | 1842.4 | 1842.4 |
| gdb 6050 | 1899.6 <sup>a</sup> | 1903.1 | 1900.8 | 1900.7 | 1902.6 | 1901.9 | 1901.9 | 1905.6 | 1905.6 | 1905.6 | 1905.6 | 1903.6 | 1903.6 | 1903.6 | 1903.6 |
| gdb 6051 | 1899.6 <sup>a</sup> | 1902.1 | 1903.3 | 1901.9 | 1901.9 | 1899.9 | 1899.1 | 1902.9 | 1902.9 | 1902.9 | 1902.9 | 1901.2 | 1901.2 | 1901.2 | 1901.2 |
| gdb 6052 | 1907.4 <sup>a</sup> | 1912.0 | 1915.7 | 1912.5 | 1912.4 | 1910.7 | 1909.4 | 1910.9 | 1910.9 | 1910.9 | 1910.9 | 1912.9 | 1912.9 | 1912.9 | 1912.9 |
| gdb 6053 | 1842.4 <sup>a</sup> | 1859.8 | 1848.6 | 1850.2 | 1851.2 | 1845.3 | 1840.4 | 1841.5 | 1841.5 | 1841.5 | 1841.5 | 1835.1 | 1835.1 | 1835.1 | 1835.1 |
| gdb 6054 | 1838.3 <sup>a</sup> | 1858.0 | 1849.1 | 1849.7 | 1849.3 | 1841.6 | 1835.4 | 1836.5 | 1836.5 | 1836.5 | 1836.5 | 1830.5 | 1830.5 | 1830.5 | 1830.5 |
| gdb 6055 | 1840.3 <sup>a</sup> | 1859.4 | 1851.3 | 1850.6 | 1851.3 | 1843.6 | 1836.8 | 1837.7 | 1837.7 | 1837.7 | 1837.7 | 1831.7 | 1831.7 | 1831.7 | 1831.7 |
| gdb 6056 | 1847.7 <sup>a</sup> | 1869.0 | 1860.7 | 1859.5 | 1858.3 | 1851.7 | 1848.2 | 1845.5 | 1845.5 | 1845.5 | 1845.5 | 1843.0 | 1842.9 | 1842.9 | 1842.9 |
| gdb 6057 | 1851.0 <sup>a</sup> | 1870.5 | 1863.0 | 1860.5 | 1862.9 | 1854.2 | 1850.3 | 1847.4 | 1847.4 | 1847.4 | 1847.4 | 1845.1 | 1845.1 | 1845.1 | 1845.1 |
| gdb 6058 | 1875.7 <sup>a</sup> | 1892.9 | 1891.2 | 1888.5 | 1882.8 | 1880.9 | 1879.8 | 1882.0 | 1882.0 | 1882.0 | 1882.0 | 1884.9 | 1884.9 | 1884.9 | 1884.9 |
| gdb 6059 | 1866.5 <sup>a</sup> | 1880.9 | 1874.4 | 1874.8 | 1870.3 | 1868.8 | 1870.0 | 1873.8 | 1873.8 | 1873.8 | 1873.8 | 1872.8 | 1872.8 | 1872.8 | 1872.8 |
| gdb 6060 | 1867.4 <sup>a</sup> | 1882.2 | 1879.1 | 1877.6 | 1873.6 | 1870.7 | 1869.1 | 1874.1 | 1874.1 | 1874.1 | 1874.1 | 1873.0 | 1873.0 | 1873.0 | 1873.0 |
| gdb 6061 | 1837.5 <sup>a</sup> | 1853.8 | 1841.3 | 1838.1 | 1837.7 | 1836.0 | 1837.8 | 1836.2 | 1836.2 | 1836.2 | 1836.2 | 1829.8 | 1829.7 | 1829.7 | 1829.7 |
| gdb 6062 | 1838.3 <sup>a</sup> | 1855.2 | 1846.1 | 1840.9 | 1840.7 | 1837.8 | 1837.1 | 1836.6 | 1836.6 | 1836.6 | 1836.6 | 1830.0 | 1829.9 | 1829.9 | 1829.9 |
| gdb 6063 | 1846.8 <sup>a</sup> | 1866.0 | 1856.6 | 1850.0 | 1848.1 | 1846.6 | 1849.0 | 1844.5 | 1844.5 | 1844.5 | 1844.5 | 1841.5 | 1841.5 | 1841.5 | 1841.5 |
| gdb 6064 | 1861.4 <sup>a</sup> | 1880.0 | 1876.3 | 1873.1 | 1864.5 | 1864.5 | 1869.2 | 1866.9 | 1866.9 | 1866.9 | 1866.9 | 1867.0 | 1866.9 | 1866.9 | 1866.9 |
| gdb 6065 | 1862.1 <sup>a</sup> | 1881.2 | 1881.0 | 1875.7 | 1867.0 | 1866.2 | 1868.2 | 1866.9 | 1866.9 | 1866.9 | 1866.9 | 1867.0 | 1867.0 | 1867.0 | 1867.0 |
| gdb 6066 | 1870.5 <sup>a</sup> | 1892.0 | 1893.2 | 1886.7 | 1876.5 | 1876.5 | 1878.9 | 1874.9 | 1874.9 | 1874.9 | 1874.9 | 1879.0 | 1879.0 | 1879.0 | 1879.0 |
| gdb 6067 | 1876.1 <sup>a</sup> | 1892.9 | 1889.4 | 1886.5 | 1882.4 | 1879.3 | 1881.1 | 1881.8 | 1881.7 | 1881.7 | 1881.7 | 1883.8 | 1883.8 | 1883.8 | 1883.8 |
| gdb 6068 | 1886.9 <sup>a</sup> | 1891.9 | 1887.6 | 1887.1 | 1886.9 | 1884.0 | 1881.8 | 1883.2 | 1883.2 | 1883.2 | 1883.2 | 1881.7 | 1881.7 | 1881.7 | 1881.7 |
| gdb 6069 | 1866.9 <sup>a</sup> | 1882.0 | 1874.6 | 1874.5 | 1869.4 | 1870.0 | 1869.8 | 1873.4 | 1873.3 | 1873.3 | 1873.3 | 1872.3 | 1872.2 | 1872.2 | 1872.2 |
| gdb 6070 | 1866.5 <sup>a</sup> | 1881.7 | 1878.5 | 1877.0 | 1872.4 | 1869.8 | 1869.7 | 1873.3 | 1873.3 | 1873.3 | 1873.3 | 1872.0 | 1872.0 | 1872.0 | 1872.0 |
| gdb 6071 | 1885.4 <sup>a</sup> | 1883.5 | 1887.6 | 1884.6 | 1885.4 | 1883.1 | 1882.8 | 1882.3 | 1882.3 | 1882.3 | 1882.3 | 1880.4 | 1880.4 | 1880.4 | 1880.4 |
| gdb 6072 | 1865.5 <sup>a</sup> | 1871.6 | 1873.1 | 1870.1 | 1868.3 | 1868.1 | 1868.8 | 1870.4 | 1870.4 | 1870.4 | 1870.4 | 1869.3 | 1869.3 | 1869.3 | 1869.3 |
| gdb 6073 | 1865.1 <sup>a</sup> | 1871.0 | 1876.3 | 1873.3 | 1870.7 | 1868.7 | 1867.1 | 1869.9 | 1869.9 | 1869.9 | 1869.9 | 1868.7 | 1868.7 | 1868.7 | 1868.7 |
| gdb 6074 | 1871.9 <sup>a</sup> | 1881.8 | 1888.4 | 1884.1 | 1878.7 | 1878.1 | 1877.5 | 1878.0 | 1878.0 | 1878.0 | 1878.0 | 1880.1 | 1880.1 | 1880.1 | 1880.2 |

. . . continued on next page. . . .

Table S26: . . . continued from previous page. . . .

| Molecule | Ref.                | MNDO   | AMI    | PM3    | PM6    | PM7    | OM1    | OM2    |        | OM3    |        | D3T    |
|----------|---------------------|--------|--------|--------|--------|--------|--------|--------|--------|--------|--------|--------|
|          |                     |        |        |        |        |        |        | D2     | D3     | D2     | D3     |        |
| gdb 6075 | 1858.9 <sup>a</sup> | 1866.7 | 1869.1 | 1868.1 | 1859.4 | 1860.5 | 1866.5 | 1866.8 | 1866.8 | 1863.8 | 1863.8 | 1863.8 |
| gdb 6076 | 1862.1 <sup>a</sup> | 1867.6 | 1871.4 | 1868.7 | 1860.8 | 1861.3 | 1867.2 | 1866.1 | 1866.1 | 1864.0 | 1864.0 | 1864.0 |
| gdb 6077 | 1859.0 <sup>a</sup> | 1865.9 | 1873.3 | 1869.7 | 1860.6 | 1859.7 | 1863.2 | 1863.8 | 1863.8 | 1861.8 | 1861.8 | 1861.8 |
| gdb 6078 | 1868.2 <sup>a</sup> | 1876.9 | 1883.9 | 1879.0 | 1867.9 | 1868.5 | 1875.1 | 1871.7 | 1871.7 | 1873.1 | 1873.1 | 1873.1 |
| gdb 6079 | 1840.1 <sup>a</sup> | 1843.3 | 1836.0 | 1835.8 | 1836.5 | 1835.3 | 1834.5 | 1837.5 | 1837.5 | 1829.0 | 1829.0 | 1829.0 |
| gdb 6080 | 1839.3 <sup>a</sup> | 1842.4 | 1838.4 | 1837.6 | 1837.6 | 1834.9 | 1831.8 | 1835.4 | 1835.4 | 1827.5 | 1827.5 | 1827.5 |
| gdb 6081 | 1848.3 <sup>a</sup> | 1853.1 | 1850.6 | 1848.7 | 1846.9 | 1845.3 | 1842.3 | 1843.4 | 1843.4 | 1839.4 | 1839.4 | 1839.4 |
| gdb 6082 | 1845.8 <sup>a</sup> | 1854.8 | 1850.0 | 1847.2 | 1850.7 | 1846.3 | 1842.2 | 1843.1 | 1843.0 | 1841.4 | 1841.4 | 1841.4 |
| gdb 6083 | 1839.9 <sup>a</sup> | 1845.7 | 1839.5 | 1837.5 | 1840.6 | 1836.0 | 1837.5 | 1836.3 | 1836.3 | 1828.6 | 1828.6 | 1828.6 |
| gdb 6084 | 1838.7 <sup>a</sup> | 1845.7 | 1841.7 | 1839.1 | 1838.6 | 1835.7 | 1835.0 | 1834.6 | 1834.6 | 1827.5 | 1827.5 | 1827.5 |
| gdb 6085 | 1847.5 <sup>a</sup> | 1856.4 | 1853.9 | 1850.2 | 1848.0 | 1846.2 | 1845.5 | 1842.5 | 1842.5 | 1839.4 | 1839.4 | 1839.4 |
| gdb 6086 | 1845.2 <sup>a</sup> | 1858.4 | 1855.2 | 1849.1 | 1851.9 | 1846.5 | 1845.7 | 1842.1 | 1842.1 | 1841.2 | 1841.2 | 1841.2 |
| gdb 6087 | 1858.3 <sup>a</sup> | 1878.0 | 1873.8 | 1871.2 | 1859.6 | 1859.7 | 1868.0 | 1864.7 | 1864.7 | 1864.1 | 1864.1 | 1864.1 |
| gdb 6088 | 1862.8 <sup>a</sup> | 1880.0 | 1877.5 | 1873.2 | 1864.2 | 1863.6 | 1870.7 | 1868.0 | 1868.0 | 1867.4 | 1867.4 | 1867.4 |
| gdb 6089 | 1859.3 <sup>a</sup> | 1879.0 | 1878.3 | 1873.8 | 1862.4 | 1861.0 | 1866.7 | 1864.5 | 1864.4 | 1864.1 | 1864.1 | 1864.1 |
| gdb 6090 | 1868.9 <sup>a</sup> | 1890.4 | 1889.6 | 1883.5 | 1870.9 | 1870.9 | 1879.4 | 1873.2 | 1873.2 | 1876.3 | 1876.3 | 1876.3 |
| gdb 6091 | 1880.8 <sup>a</sup> | 1879.7 | 1882.5 | 1882.0 | 1878.2 | 1876.6 | 1875.8 | 1876.0 | 1875.9 | 1873.9 | 1873.9 | 1873.9 |
| gdb 6092 | 1860.6 <sup>a</sup> | 1870.4 | 1869.7 | 1868.9 | 1861.5 | 1862.6 | 1865.8 | 1867.2 | 1867.2 | 1865.1 | 1865.1 | 1865.1 |
| gdb 6093 | 1864.7 <sup>a</sup> | 1870.4 | 1872.9 | 1870.9 | 1866.5 | 1865.2 | 1868.9 | 1870.3 | 1870.3 | 1868.5 | 1868.5 | 1868.5 |
| gdb 6094 | 1861.2 <sup>a</sup> | 1870.1 | 1873.5 | 1871.5 | 1864.5 | 1862.6 | 1864.6 | 1867.1 | 1867.1 | 1865.1 | 1865.1 | 1865.1 |
| gdb 6095 | 1870.1 <sup>a</sup> | 1881.1 | 1886.0 | 1882.7 | 1874.2 | 1873.4 | 1876.0 | 1875.3 | 1875.3 | 1877.3 | 1877.3 | 1877.3 |

a R.Ramakrishnan, P.O.Dral, M.Rupp, O.A. von Lilienfeld, Sci.Data 1, 140022 (2014)

Table S27: Benchmark Results for the A24-CHNOF Data Set. Interaction Energies (kcal/mol)

| Complex                                   | Ref.              | MNDO | AM1  | PM3  | PM6  | PM7  | OM1  | OM2  |      | OM3  |      | D3T  |
|-------------------------------------------|-------------------|------|------|------|------|------|------|------|------|------|------|------|
|                                           |                   |      |      |      |      |      |      | D2   | D3   | D2   | D3   |      |
| Single point calculations                 |                   |      |      |      |      |      |      |      |      |      |      |      |
| water-ammonia                             | -6.5 <sup>a</sup> | 5.9  | -0.8 | -2.3 | -3.9 | -6.5 | -2.6 | -4.5 | -5.0 | -5.4 | -6.0 | -6.0 |
| water-water                               | -5.0 <sup>a</sup> | 6.4  | -2.9 | -2.7 | -3.9 | -4.9 | -2.8 | -4.0 | -4.3 | -4.1 | -4.6 | -4.6 |
| HCN-HCN                                   | -4.7 <sup>a</sup> | 1.7  | -0.4 | -2.3 | -2.5 | -3.2 | -3.1 | -3.4 | -3.7 | -3.8 | -4.1 | -4.3 |
| HF-HF                                     | -4.6 <sup>a</sup> | 6.4  | -2.3 | -5.0 | 3.5  | 5.8  | 1.1  | -1.2 | -1.5 | -1.4 | 0.2  | 0.2  |
| ammonia-ammonia                           | -3.2 <sup>a</sup> | 4.2  | -0.9 | 0.7  | -2.3 | -4.3 | -1.5 | -2.0 | -2.6 | -2.5 | -1.9 | -2.6 |
| HF-methane                                | -1.7 <sup>a</sup> | 6.1  | -0.6 | -1.0 | -0.3 | -0.6 | 1.2  | -0.6 | -1.2 | -1.0 | 0.1  | -0.8 |
| ammonia-methane                           | -0.8 <sup>a</sup> | 1.1  | -0.1 | -0.0 | -0.5 | -0.8 | -0.2 | -0.5 | -0.7 | -0.8 | -0.5 | -0.8 |
| water-methane                             | -0.7 <sup>a</sup> | 1.5  | -0.4 | -0.1 | -0.5 | -0.5 | -0.2 | -0.4 | -0.6 | -0.6 | -0.4 | -0.7 |
| formaldehyde-                             |                   |      |      |      |      |      |      |      |      |      |      |      |
| formaldehyde                              | -4.5 <sup>a</sup> | 7.5  | -1.4 | 1.5  | -3.8 | -3.6 | -1.9 | -3.2 | -4.2 | -4.1 | -2.3 | -3.5 |
| water-ethene                              | -2.6 <sup>a</sup> | 4.1  | -1.0 | -1.6 | -1.3 | -1.5 | -0.2 | -1.7 | -2.4 | -2.4 | -1.2 | -2.0 |
| formaldehyde-ethene                       | -1.6 <sup>a</sup> | 2.8  | 0.3  | 0.2  | -0.6 | -0.9 | -0.1 | -0.7 | -1.4 | -1.5 | -0.4 | -1.4 |
| ethyne-ethyne                             | -1.5 <sup>a</sup> | 1.6  | -0.4 | -0.9 | -0.5 | -0.8 | -0.3 | -1.2 | -1.6 | -1.7 | -0.7 | -1.3 |
| ammonia-ethene                            | -1.4 <sup>a</sup> | 2.0  | -0.4 | -0.6 | -0.8 | -1.3 | -0.1 | -0.7 | -1.2 | -1.3 | -0.4 | -1.2 |
| ethene-ethene                             | -1.1 <sup>a</sup> | 2.0  | 0.1  | -0.6 | -0.3 | -1.1 | 0.1  | -0.2 | -0.9 | -1.1 | -0.0 | -1.1 |
| methane-ethene                            | -0.5 <sup>a</sup> | 0.7  | 0.1  | -0.2 | -0.2 | -0.7 | 0.0  | -0.1 | -0.4 | -0.6 | -0.1 | -0.4 |
| methane-ethane                            | -0.8 <sup>a</sup> | 2.3  | 0.1  | -0.6 | -0.2 | -0.7 | 0.2  | 0.1  | -0.6 | -0.8 | 0.3  | -0.6 |
| methane-ethane                            | -0.6 <sup>a</sup> | 1.6  | 0.2  | -0.3 | -0.1 | -0.5 | 0.1  | 0.1  | -0.4 | -0.6 | 0.2  | -0.5 |
| methane-methane                           | -0.5 <sup>a</sup> | 1.5  | 0.2  | -0.3 | -0.1 | -0.4 | 0.1  | 0.1  | -0.4 | -0.5 | -0.2 | -0.4 |
| ethene-ethyne                             | 0.8 <sup>a</sup>  | 1.6  | 1.0  | 0.6  | 0.1  | -0.6 | 0.4  | 0.6  | 0.0  | -0.2 | 0.5  | -0.2 |
| ethene-ethene                             | 0.9 <sup>a</sup>  | 1.8  | 1.0  | 0.5  | 0.1  | -0.8 | 0.3  | 0.7  | -0.0 | -0.3 | 0.6  | -0.3 |
| ethyne-ethyne                             | 1.1 <sup>a</sup>  | 1.6  | 1.0  | 0.7  | 0.2  | -0.4 | 0.6  | 1.0  | 0.5  | 0.3  | 0.8  | 0.1  |
| Full optimizations of dimers and monomers |                   |      |      |      |      |      |      |      |      |      |      |      |
| water-ammonia                             | -6.5 <sup>a</sup> | -1.0 | -2.9 | -3.0 | -4.4 | -6.7 | -4.7 | -4.9 | -5.5 | -6.9 | -7.7 | -7.8 |
| water-water                               | -5.0 <sup>a</sup> | -1.0 | -5.5 | -3.5 | -4.9 | -6.6 | -4.3 | -4.3 | -4.8 | -4.5 | -5.0 | -5.1 |
| HCN-HCN                                   | -4.7 <sup>a</sup> | -1.1 | -1.6 | -4.0 | -2.6 | -3.1 | -3.2 | -3.5 | -3.9 | -4.0 | -4.5 | -4.9 |
| HF-HF                                     | -4.6 <sup>a</sup> | -1.3 | -4.0 | -6.2 | -0.8 | -1.0 | -2.1 | -2.2 | -2.6 | -2.4 | -1.6 | -2.1 |
| ammonia-ammonia                           | -3.2 <sup>a</sup> | -0.8 | -1.4 | -0.7 | -2.4 | -5.8 | -2.0 | -2.0 | -2.5 | -2.5 | -1.9 | -2.5 |
| HF-methane                                | -1.7 <sup>a</sup> | -0.0 | -0.8 | -2.7 | -0.7 | -0.8 | -0.1 | -0.7 | -1.3 | -1.1 | -0.3 | -0.9 |
| ammonia-methane                           | -0.8 <sup>a</sup> | 0.0  | -0.1 | -0.7 | -0.6 | -1.0 | -0.2 | -0.6 | -1.0 | -1.0 | -0.6 | -1.1 |
| water-methane                             | -0.7 <sup>a</sup> | -0.0 | -0.8 | -1.2 | -0.9 | -0.6 | -0.2 | -0.6 | -0.9 | -1.0 | -0.4 | -0.9 |
| formaldehyde-                             |                   |      |      |      |      |      |      |      |      |      |      |      |
| formaldehyde                              | -4.5 <sup>a</sup> | -0.8 | -2.0 | -1.0 | -4.6 | -4.3 | -2.8 | -3.8 | -4.9 | -4.8 | -2.7 | -3.9 |
| water-ethene                              | -2.6 <sup>a</sup> | -0.0 | -1.1 | -1.7 | -1.3 | -1.6 | -0.7 | -2.4 | -3.3 | -3.3 | -1.4 | -2.3 |
| formaldehyde-ethene                       | -1.6 <sup>a</sup> | -0.0 | -0.6 | -0.8 | -1.1 | -1.2 | -0.5 | -1.2 | -2.1 | -2.1 | -0.6 | -2.1 |
| ethyne-ethyne                             | -1.5 <sup>a</sup> | 0.0  | -0.5 | -1.1 | -0.4 | -0.8 | -0.3 | -1.9 | -2.6 | -2.6 | -0.8 | -1.4 |
| ammonia-ethene                            | -1.4 <sup>a</sup> | -0.0 | -0.7 | -0.8 | -0.9 | -1.5 | -0.5 | -1.0 | -1.8 | -1.8 | -0.6 | -1.5 |
| ethene-ethene                             | -1.1 <sup>a</sup> | 0.0  | -0.2 | -3.4 | -0.4 | -1.1 | -0.0 | -0.3 | -1.5 | -1.5 | -0.1 | -1.0 |
| methane-ethene                            | -0.5 <sup>a</sup> | -0.0 | -0.4 | -0.8 | -0.3 | -0.9 | -0.0 | -0.3 | -1.0 | -1.0 | -0.1 | -0.7 |
| methane-ethane                            | -0.8 <sup>a</sup> | -0.0 | -0.5 | -1.2 | -0.3 | -0.8 | -0.0 | -0.4 | -1.0 | -1.0 | -0.0 | -0.7 |
| methane-ethane                            | -0.6 <sup>a</sup> | -0.0 | -0.4 | -0.9 | -0.2 | -0.8 | -0.0 | -0.0 | -1.0 | -0.6 | -0.0 | -0.5 |
| methane-methane                           | -0.5 <sup>a</sup> | -0.0 | -0.0 | -2.2 | -0.2 | -0.5 | -0.0 | -0.0 | -0.7 | -0.8 | 0.0  | -0.4 |

... continued on next page ...

Table S27: . . . continued from previous page . . .

| Complex                                                                         | Ref.              | MNDO | AM1  | PM3  | PM6  | PM7  | OM1  | OM2  |      |      | OM3  |      |      | D3T  |
|---------------------------------------------------------------------------------|-------------------|------|------|------|------|------|------|------|------|------|------|------|------|------|
|                                                                                 |                   |      |      |      |      |      |      | D2   | D3   | D3T  | D2   | D3   | D3T  |      |
| Full optimizations of dimers, single point calculations on fragments (monomers) |                   |      |      |      |      |      |      |      |      |      |      |      |      |      |
| water-ammonia                                                                   | -6.5 <sup>a</sup> | -1.0 | -2.9 | -3.2 | -4.4 | -6.7 | -4.7 | -5.0 | -5.6 | -5.6 | -5.6 | -7.2 | -8.1 | -8.1 |
| water-water                                                                     | -5.0 <sup>a</sup> | -1.0 | -5.5 | -3.6 | -5.1 | -6.6 | -4.3 | -4.4 | -4.8 | -4.8 | -4.8 | -4.5 | -5.1 | -5.1 |
| HCN-HCN                                                                         | -4.7 <sup>a</sup> | -1.1 | -1.6 | -4.4 | -2.7 | -3.1 | -3.2 | -3.5 | -3.9 | -4.0 | -4.0 | -4.5 | -4.9 | -5.3 |
| HF-HF                                                                           | -4.6 <sup>a</sup> | -1.3 | -4.0 | -6.2 | -0.8 | -1.0 | -2.1 | -2.2 | -2.6 | -2.4 | -2.4 | -1.6 | -2.1 | -1.9 |
| ammonia-ammonia                                                                 | -3.2 <sup>a</sup> | -0.8 | -1.4 | -0.7 | -2.4 | -5.9 | -2.1 | -2.0 | -2.5 | -2.5 | -2.5 | -1.9 | -2.6 | -2.5 |
| HF-methane                                                                      | -1.7 <sup>a</sup> | -0.0 | -0.8 | -2.7 | -0.7 | -0.9 | -0.1 | -0.7 | -1.3 | -1.1 | -1.1 | -0.3 | -0.9 | -0.8 |
| ammonia-methane                                                                 | -0.8 <sup>a</sup> | 0.0  | -0.1 | -0.7 | -0.6 | -1.0 | -0.2 | -0.6 | -1.0 | -1.0 | -1.0 | -0.6 | -1.1 | -1.1 |
| water-methane                                                                   | -0.7 <sup>a</sup> | -0.0 | -0.8 | -1.2 | -0.9 | -0.7 | -0.2 | -0.6 | -1.0 | -1.0 | -1.0 | -0.4 | -1.0 | -0.8 |
| formaldehyde-formaldehyde                                                       | -4.5 <sup>a</sup> | -0.8 | -2.1 | -1.0 | -4.9 | -4.3 | -2.8 | -3.9 | -5.0 | -4.9 | -4.9 | -2.7 | -3.7 | -3.9 |
| water-ethene                                                                    | -2.6 <sup>a</sup> | -0.0 | -1.1 | -1.7 | -1.4 | -1.6 | -0.7 | -2.5 | -3.3 | -3.3 | -3.3 | -1.5 | -2.3 | -2.6 |
| formaldehyde-ethene                                                             | -1.6 <sup>a</sup> | -0.0 | -0.6 | -0.8 | -1.1 | -1.2 | -0.5 | -1.2 | -2.2 | -2.1 | -2.1 | -0.6 | -2.1 | -2.4 |
| ethyne-ethyne                                                                   | -1.5 <sup>a</sup> | 0.0  | -0.5 | -1.1 | -0.4 | -0.8 | -0.4 | -1.9 | -2.6 | -2.7 | -2.7 | -0.8 | -1.4 | -1.7 |
| ammonia-ethene                                                                  | -1.4 <sup>a</sup> | -0.0 | -0.7 | -0.8 | -1.0 | -1.5 | -0.5 | -1.0 | -1.8 | -1.8 | -1.8 | -0.6 | -1.6 | -1.7 |
| ethene-ethene                                                                   | -1.1 <sup>a</sup> | 0.0  | -0.2 | -3.5 | -0.4 | -1.1 | -0.0 | -0.3 | -1.5 | -1.5 | -1.5 | -0.1 | -1.0 | -1.2 |
| methane-ethene                                                                  | -0.5 <sup>a</sup> | -0.0 | -0.4 | -0.8 | -0.3 | -0.9 | -0.0 | -0.3 | -1.0 | -1.1 | -1.0 | -0.1 | -0.7 | -0.8 |
| methane-ethane                                                                  | -0.8 <sup>a</sup> | -0.0 | -0.5 | -1.2 | -0.3 | -0.8 | -0.0 | -0.4 | -1.0 | -1.0 | -1.0 | -0.0 | -0.7 | -0.8 |
| methane-ethane                                                                  | -0.6 <sup>a</sup> | -0.0 | -0.4 | -0.9 | -0.2 | -0.8 | -0.0 | -0.0 | -1.0 | -0.6 | -0.6 | -0.0 | -0.5 | -0.6 |
| methane-methane                                                                 | -0.5 <sup>a</sup> | -0.0 | -0.0 | -2.2 | -0.2 | -0.5 | -0.0 | -0.0 | -0.7 | -0.8 | -0.8 | 0.0  | -0.4 | -0.5 |

a J.Rezac and P.Hobza, J.Chem.Theory Comput. 9, 2151 (2013).

Table S28: Benchmark Results for the S66 Data Set. Interaction Energies (kcal/mol)

| Complex                   | Ref.               | MNDO | AM1  | PM3   | PM6   | PM7   | OM1   | OM2   |       |       | OM3   |       |       |       |
|---------------------------|--------------------|------|------|-------|-------|-------|-------|-------|-------|-------|-------|-------|-------|-------|
|                           |                    |      |      |       |       |       |       | D2    | D3    | D3T   | D2    | D3    | D3T   |       |
| Single point calculations |                    |      |      |       |       |       |       |       |       |       |       |       |       |       |
| Water-Water               | -5.0 <sup>a</sup>  | 6.3  | -2.9 | -2.6  | -3.9  | -4.9  | -2.8  | -4.0  | -4.3  | -4.3  | -4.3  | -4.2  | -4.6  | -4.7  |
| Water-MeOH                | -5.7 <sup>a</sup>  | 8.8  | -2.1 | -2.5  | -4.2  | -5.0  | -2.0  | -3.9  | -4.5  | -4.5  | -4.5  | -3.7  | -4.4  | -4.5  |
| Water-MeNH2               | -7.0 <sup>a</sup>  | 6.8  | -0.4 | -2.2  | -4.1  | -6.8  | -2.3  | -4.4  | -5.0  | -5.1  | -5.0  | -5.2  | -5.9  | -6.0  |
| Water-Peptide             | -8.2 <sup>a</sup>  | 11.3 | -2.8 | -4.5  | -6.3  | -7.6  | -3.6  | -6.2  | -7.1  | -7.1  | -7.1  | -5.8  | -6.9  | -7.0  |
| MeOH-MeOH                 | -5.9 <sup>a</sup>  | 9.0  | -1.6 | -2.4  | -3.5  | -4.6  | -1.9  | -3.3  | -4.1  | -4.1  | -4.1  | -3.1  | -4.0  | -4.1  |
| MeOH-MeNH2                | -7.7 <sup>a</sup>  | 8.2  | 0.0  | -2.4  | -3.1  | -6.0  | -2.3  | -3.8  | -4.8  | -4.9  | -4.9  | -4.6  | -5.9  | -6.1  |
| MeOH-Peptide              | -8.3 <sup>a</sup>  | 12.0 | -1.8 | -4.0  | -4.9  | -6.8  | -2.9  | -5.0  | -6.2  | -6.2  | -6.2  | -4.6  | -6.0  | -6.2  |
| MeOH-Water                | -5.1 <sup>a</sup>  | 6.6  | -2.4 | -2.5  | -3.2  | -4.3  | -2.6  | -3.4  | -3.8  | -3.8  | -3.8  | -3.5  | -4.0  | -4.1  |
| MeNH2-MeOH                | -3.1 <sup>a</sup>  | 5.3  | -1.8 | -0.0  | -2.3  | -4.6  | -1.2  | -1.4  | -2.3  | -2.4  | -2.4  | -1.2  | -2.2  | -2.4  |
| MeNH2-MeNH2               | -4.2 <sup>a</sup>  | 7.3  | 0.0  | 0.8   | -1.8  | -5.4  | -0.8  | -1.5  | -2.7  | -2.7  | -2.7  | -1.2  | -2.7  | -2.8  |
| MeNH2-Peptide             | -5.5 <sup>a</sup>  | 9.2  | -1.9 | 0.7   | -3.9  | -6.2  | -1.8  | -2.8  | -4.4  | -4.6  | -4.5  | -2.2  | -4.2  | -4.3  |
| MeNH2-Water               | -7.4 <sup>a</sup>  | 9.1  | -0.1 | -2.0  | -3.9  | -6.5  | -1.8  | -4.3  | -5.1  | -5.1  | -5.1  | -5.0  | -5.9  | -6.0  |
| Peptide-MeOH              | -6.3 <sup>a</sup>  | 8.5  | -2.6 | -1.0  | -4.2  | -6.5  | -2.5  | -3.9  | -5.0  | -5.2  | -5.2  | -3.4  | -4.8  | -5.0  |
| Peptide-MeNH2             | -7.6 <sup>a</sup>  | 7.3  | -1.3 | -1.6  | -4.2  | -9.4  | -2.9  | -4.1  | -5.5  | -5.8  | -5.7  | -4.2  | -5.9  | -6.2  |
| Peptide-Peptide           | -8.7 <sup>a</sup>  | 10.1 | -3.1 | -2.8  | -5.9  | -9.5  | -3.5  | -5.3  | -7.0  | -7.3  | -7.3  | -4.5  | -6.5  | -6.9  |
| Peptide-Water             | -5.2 <sup>a</sup>  | 5.2  | -3.3 | -1.4  | -3.8  | -6.1  | -3.1  | -3.8  | -4.3  | -4.5  | -4.4  | -3.7  | -4.4  | -4.6  |
| Uracil-Uracil_BP          | -17.4 <sup>a</sup> | 17.6 | -3.9 | -8.3  | -11.3 | -16.1 | -8.1  | -13.8 | -15.4 | -15.7 | -15.8 | -12.7 | -14.5 | -15.1 |
| Water-Pyridine            | -7.0 <sup>a</sup>  | 6.8  | 0.7  | -1.8  | -3.1  | -6.1  | -1.9  | -3.7  | -4.4  | -4.5  | -4.5  | -4.5  | -5.3  | -5.5  |
| MeOH-Pyridine             | -7.5 <sup>a</sup>  | 7.4  | 1.1  | -1.8  | -2.2  | -5.5  | -1.9  | -3.2  | -4.1  | -4.3  | -4.3  | -4.1  | -5.2  | -5.5  |
| AcOH-AcOH                 | -19.4 <sup>a</sup> | 24.4 | 0.9  | -10.5 | -11.1 | -18.8 | -6.3  | -13.8 | -15.1 | -15.1 | -15.2 | -11.9 | -13.4 | -13.8 |
| AcNH2-AcNH2               | -16.5 <sup>a</sup> | 16.1 | -5.9 | -8.4  | -12.4 | -16.7 | -7.7  | -12.9 | -14.3 | -14.4 | -14.5 | -11.8 | -13.4 | -13.8 |
| AcOH-Uracil               | -19.8 <sup>a</sup> | 20.2 | -2.4 | -10.8 | -12.0 | -18.2 | -8.7  | -15.4 | -16.8 | -17.0 | -17.0 | -13.8 | -15.5 | -16.0 |
| AcNH2-Uracil              | -19.5 <sup>a</sup> | 15.9 | -6.3 | -10.3 | -14.1 | -18.9 | -10.1 | -16.1 | -17.6 | -17.8 | -17.8 | -14.9 | -16.7 | -17.1 |
| Benzene-Benzene_pi-pi     | -2.7 <sup>a</sup>  | 4.6  | 2.6  | 1.7   | 0.0   | -4.4  | 0.7   | 1.2   | -1.2  | -2.1  | -1.9  | 1.0   | -1.9  | -2.7  |
| Pyridine-Pyridine_pi-pi   | -3.8 <sup>a</sup>  | 5.6  | 2.4  | 2.0   | -1.0  | -5.3  | -0.2  | -0.2  | -2.8  | -3.6  | -3.5  | -0.2  | -3.3  | -4.1  |
| Uracil-Uracil_pi-pi       | -9.8 <sup>a</sup>  | 14.3 | 0.2  | 6.3   | -4.4  | -8.5  | -2.7  | -4.4  | -8.8  | -9.4  | -9.2  | -3.9  | -9.3  | -10.0 |
| Benzene-Pyridine_pi-pi    | -3.3 <sup>a</sup>  | 5.2  | 2.5  | 1.8   | -0.6  | -4.9  | 0.1   | 0.5   | -2.0  | -2.9  | -2.8  | 0.3   | -2.7  | -3.6  |
| Benzene-Uracil_pi-pi      | -5.6 <sup>a</sup>  | 9.6  | 3.9  | 3.5   | -1.6  | -5.5  | -0.5  | -1.1  | -4.6  | -5.4  | -5.4  | -0.9  | -5.2  | -5.9  |
| Pyridine-Uracil_pi-pi     | -6.7 <sup>a</sup>  | 8.7  | 2.4  | 3.2   | -3.3  | -6.9  | -1.8  | -2.4  | -5.9  | -6.6  | -6.4  | -2.2  | -6.4  | -7.1  |
| Benzene-Ethene            | -1.4 <sup>a</sup>  | 2.9  | 1.6  | 1.0   | 0.1   | -2.1  | 0.4   | 1.0   | -0.4  | -0.9  | -0.8  | 0.8   | -0.9  | -1.4  |
| Uracil-Ethene             | -3.3 <sup>a</sup>  | 6.1  | 1.6  | 1.7   | -1.0  | -2.7  | -0.2  | -0.9  | -2.8  | -3.2  | -3.1  | -0.7  | -3.0  | -3.5  |
| Uracil-Ethyne             | -3.7 <sup>a</sup>  | 4.7  | 1.2  | 1.3   | -1.1  | -2.3  | -1.0  | -1.7  | -3.3  | -3.7  | -3.6  | -1.5  | -3.5  | -4.0  |
| Pyridine-Ethene           | -1.8 <sup>a</sup>  | 3.6  | 1.6  | 1.2   | -0.2  | -2.3  | 0.1   | 0.5   | -1.0  | -1.4  | -1.4  | 0.3   | -1.4  | -2.0  |
| Pentane-Pentane           | -3.8 <sup>a</sup>  | 10.7 | -0.3 | -3.4  | -0.6  | -4.1  | 1.4   | -0.2  | -3.5  | -4.0  | -3.9  | 1.1   | -3.1  | -3.5  |
| Neopentane-Pentane        | -2.6 <sup>a</sup>  | 6.7  | -0.7 | -3.0  | -0.7  | -3.5  | 0.9   | -0.4  | -2.7  | -3.2  | -3.1  | 0.5   | -2.4  | -2.6  |
| Neopentane-Neopentane     | -1.8 <sup>a</sup>  | 3.8  | -0.7 | -2.6  | -0.6  | -2.8  | 0.5   | -0.5  | -2.1  | -2.6  | -2.5  | 0.1   | -1.9  | -2.2  |
| Cyclopentane-Neopentane   | -2.4 <sup>a</sup>  | 6.4  | -0.7 | -2.9  | -0.7  | -3.3  | 0.9   | -0.6  | -2.7  | -3.2  | -3.1  | 0.3   | -2.4  | -2.6  |
| Cyclopentane-Cyclopentane | -3.0 <sup>a</sup>  | 8.0  | -0.5 | -3.0  | -0.4  | -3.4  | 1.3   | -0.4  | -3.0  | -3.3  | -3.2  | 0.7   | -2.6  | -2.7  |
| Benzene-Cyclopentane      | -3.5 <sup>a</sup>  | 7.1  | 1.2  | -0.5  | -0.5  | -4.2  | 0.8   | 0.3   | -2.3  | -3.0  | -2.8  | 0.8   | -2.5  | -3.0  |
| Benzene-Neopentane        | -2.8 <sup>a</sup>  | 5.0  | 0.6  | -0.7  | -0.7  | -3.9  | 0.5   | -0.1  | -2.1  | -2.8  | -2.7  | 0.3   | -2.2  | -2.7  |
| Uracil-Pentane            | -4.8 <sup>a</sup>  | 14.0 | 1.5  | 2.1   | -1.8  | -5.1  | 0.7   | -0.6  | -4.2  | -4.8  | -4.6  | -0.0  | -4.6  | -4.9  |

... continued on next page ...

Table S28: . . . continued from previous page . . .

| Complex                                   | Ref.               | MND0 | AMI  | PM3  | PM6   | PM7   | OM1  | OM2   |       | OM3   |       | OM3   |       | D3T   |
|-------------------------------------------|--------------------|------|------|------|-------|-------|------|-------|-------|-------|-------|-------|-------|-------|
|                                           |                    |      |      |      |       |       |      | D2    | D3    | D2    | D3    | D2    | D3    |       |
| Uracil-Cyclopentane                       | -4.1 <sup>a</sup>  | 11.7 | 1.5  | 1.6  | -1.2  | -4.5  | 0.8  | -0.3  | -3.4  | -3.9  | -3.8  | 0.2   | -3.8  | -4.1  |
| Uracil-Neopentane                         | -3.7 <sup>a</sup>  | 9.2  | 1.2  | 1.5  | -1.0  | -3.6  | 0.6  | -0.4  | -2.9  | -3.5  | -3.3  | 0.0   | -3.2  | -3.5  |
| Ethene-Pentane                            | -2.0 <sup>a</sup>  | 5.6  | -0.1 | -1.7 | -0.5  | -2.1  | 0.6  | -0.2  | -1.9  | -2.2  | -2.1  | 0.5   | -1.6  | -1.9  |
| Ethine-Pentane                            | -1.7 <sup>a</sup>  | 3.3  | 0.7  | -0.3 | -0.3  | -1.7  | 0.3  | 0.1   | -1.1  | -1.5  | -1.5  | 0.3   | -1.2  | -1.6  |
| Peptide-Pentane                           | -4.3 <sup>a</sup>  | 12.4 | 0.4  | -0.3 | -1.3  | -3.8  | 1.0  | -0.4  | -3.5  | -3.9  | -3.7  | 0.6   | -3.4  | -3.6  |
| Benzene-Benzene_TS                        | -2.8 <sup>a</sup>  | 5.0  | 0.6  | -0.4 | -0.8  | -3.2  | 0.4  | -0.6  | -2.3  | -2.8  | -2.7  | 0.0   | -2.1  | -2.6  |
| Pyridine-Pyridine_TS                      | -3.5 <sup>a</sup>  | 6.4  | 0.8  | 0.7  | -1.2  | -3.3  | 0.1  | -1.2  | -2.9  | -3.3  | -3.3  | -0.5  | -2.7  | -3.1  |
| Benzene-Pyridine_TS                       | -3.3 <sup>a</sup>  | 5.3  | 0.3  | -0.6 | -1.2  | -3.5  | 0.2  | -1.0  | -2.8  | -3.3  | -3.2  | -0.3  | -2.5  | -3.0  |
| Benzene-Ethine_CH-pi                      | -2.9 <sup>a</sup>  | 4.6  | -0.1 | -0.8 | -1.0  | -2.1  | -0.1 | -1.8  | -3.0  | -3.1  | -3.1  | -0.8  | -2.3  | -2.5  |
| Ethine-Ethine_TS                          | -1.5 <sup>a</sup>  | 1.6  | -0.4 | -0.9 | -0.5  | -0.8  | -0.3 | -1.2  | -1.6  | -1.7  | -1.7  | -0.7  | -1.2  | -1.3  |
| Benzene-AcOH_OH-pi                        | -4.7 <sup>a</sup>  | 8.0  | -0.4 | -1.4 | -2.6  | -3.9  | -0.6 | -2.7  | -4.4  | -4.6  | -4.5  | -1.6  | -3.7  | -4.0  |
| Benzene-AcNH2_NH-pi                       | -4.4 <sup>a</sup>  | 6.3  | -1.2 | -0.9 | -2.4  | -3.7  | -1.2 | -3.0  | -4.5  | -4.7  | -4.7  | -2.1  | -3.9  | -4.2  |
| Benzene-Water_OH-pi                       | -3.3 <sup>a</sup>  | 5.1  | -0.7 | -1.5 | -2.3  | -2.8  | -0.8 | -2.4  | -3.5  | -3.6  | -3.6  | -1.7  | -3.1  | -3.3  |
| Benzene-MeOH_OH-pi                        | -4.2 <sup>a</sup>  | 7.3  | 0.0  | -1.1 | -1.9  | -3.3  | -0.3 | -1.8  | -3.6  | -3.8  | -3.7  | -1.1  | -3.3  | -3.6  |
| Benzene-MeNH2_NH-pi                       | -3.2 <sup>a</sup>  | 5.9  | 0.2  | -0.4 | -1.4  | -3.6  | -0.0 | -0.8  | -2.6  | -2.9  | -2.9  | -0.3  | -2.5  | -2.8  |
| Benzene-Peptide_NH-pi                     | -5.3 <sup>a</sup>  | 8.0  | -0.1 | -1.0 | -2.3  | -5.4  | -0.4 | -1.9  | -4.4  | -4.8  | -4.7  | -0.9  | -4.0  | -4.4  |
| Pyridine-Pyridine_CH-N                    | -4.2 <sup>a</sup>  | 5.6  | -0.1 | -0.0 | -2.5  | -3.6  | -1.1 | -2.6  | -3.7  | -3.9  | -3.9  | -1.8  | -3.2  | -3.4  |
| Ethine-Water_CH-O                         | -2.9 <sup>a</sup>  | 3.7  | -1.8 | -0.6 | -1.8  | -1.5  | -1.8 | -3.1  | -3.4  | -3.4  | -3.4  | -2.7  | -3.1  | -3.2  |
| Ethine-AcOH_OH-pi                         | -5.0 <sup>a</sup>  | 6.5  | -1.4 | -1.8 | -1.8  | -2.3  | -1.4 | -4.0  | -5.0  | -5.0  | -5.0  | -2.9  | -4.0  | -4.2  |
| Pentane-AcOH                              | -2.9 <sup>a</sup>  | 8.8  | 0.2  | -0.3 | -1.3  | -2.8  | 0.3  | -0.6  | -2.8  | -3.2  | -3.1  | -0.0  | -2.8  | -3.1  |
| Pentane-AcNH2                             | -3.5 <sup>a</sup>  | 10.0 | 0.1  | -0.3 | -1.5  | -3.5  | 0.4  | -0.8  | -3.2  | -3.6  | -3.5  | -0.1  | -3.2  | -3.4  |
| Benzene-AcOH                              | -3.7 <sup>a</sup>  | 6.7  | 1.3  | 0.7  | -1.6  | -3.4  | -0.2 | -1.5  | -3.6  | -4.0  | -3.9  | -0.7  | -3.3  | -3.7  |
| Peptide-Ethene                            | -3.0 <sup>a</sup>  | 6.5  | 0.1  | 0.3  | -1.3  | -2.4  | -0.1 | -1.2  | -2.7  | -2.9  | -2.9  | -0.7  | -2.5  | -2.8  |
| Pyridine-Ethine                           | -4.1 <sup>a</sup>  | 3.7  | 0.4  | -0.5 | -1.3  | -1.8  | -1.7 | -3.4  | -3.9  | -4.1  | -4.1  | -2.9  | -3.6  | -3.9  |
| MeNH2-Pyridine                            | -4.0 <sup>a</sup>  | 7.5  | 1.0  | 1.9  | -1.3  | -4.3  | -0.2 | -1.0  | -2.6  | -2.9  | -2.8  | -0.6  | -2.7  | -2.9  |
| Full optimizations of dimers and monomers |                    |      |      |      |       |       |      |       |       |       |       |       |       |       |
| Water-Water                               | -5.0 <sup>a</sup>  | -1.0 | -5.5 | -3.5 | -4.9  | -6.6  | -4.3 | -4.3  | -4.8  | -4.7  | -4.7  | -4.5  | -5.0  | -5.1  |
| Water-MeOH                                | -5.7 <sup>a</sup>  | -0.9 | -5.1 | -2.9 | -4.4  | -6.9  | -3.9 | -4.0  | -4.8  | -4.7  | -4.7  | -3.9  | -4.8  | -4.8  |
| Water-MeNH2                               | -7.0 <sup>a</sup>  | -0.9 | -3.0 | -2.6 | -4.7  | -7.2  | -4.4 | -4.3  | -5.1  | -5.1  | -5.1  | -6.1  | -7.1  | -7.2  |
| Water-Peptide                             | -8.2 <sup>a</sup>  | -1.4 | -6.3 | -4.2 | -6.9  | -9.2  | -5.2 | -6.9  | -7.9  | -7.8  | -7.8  | -6.4  | -7.5  | -7.5  |
| MeOH-MeOH                                 | -5.9 <sup>a</sup>  | -0.6 | -3.7 | -2.6 | -4.8  | -4.9  | -2.8 | -3.4  | -4.4  | -4.3  | -4.3  | -3.3  | -4.1  | -4.3  |
| MeOH-MeNH2                                | -7.7 <sup>a</sup>  | -0.7 | -2.5 | -2.5 | -3.9  | -6.7  | -3.4 | -4.1  | -5.4  | -5.4  | -5.4  | -6.5  | -8.0  | -8.2  |
| MeOH-Peptide                              | -8.3 <sup>a</sup>  | -1.1 | -4.2 | -3.8 | -6.0  | -8.4  | -4.0 | -6.4  | -7.6  | -7.6  | -7.6  | -6.0  | -7.3  | -7.5  |
| MeOH-Water                                | -5.1 <sup>a</sup>  | -0.7 | -5.1 | -3.2 | -5.0  | -4.5  | -3.1 | -3.9  | -4.4  | -4.4  | -4.4  | -4.1  | -4.8  | -4.8  |
| MeNH2-MeOH                                | -3.1 <sup>a</sup>  | -0.5 | -2.5 | -2.6 | -2.9  | -5.1  | -2.1 | -4.1  | -2.9  | -2.9  | -2.9  | -6.5  | -2.7  | -2.7  |
| MeNH2-MeNH2                               | -4.2 <sup>a</sup>  | -0.5 | -1.6 | -1.3 | -2.8  | -6.3  | -2.4 | -1.7  | -2.8  | -2.9  | -2.9  | -1.7  | -2.8  | -3.0  |
| MeNH2-Peptide                             | -5.5 <sup>a</sup>  | -0.8 | -3.5 | -1.7 | -4.3  | -7.2  | -3.1 | -3.5  | -4.9  | -4.9  | -4.9  | -2.7  | -4.5  | -4.5  |
| MeNH2-Water                               | -7.4 <sup>a</sup>  | -0.9 | -2.8 | -2.6 | -4.7  | -7.2  | -4.4 | -4.3  | -5.1  | -5.1  | -5.1  | -6.1  | -7.1  | -7.2  |
| Peptide-MeOH                              | -6.3 <sup>a</sup>  | -0.7 | -3.2 | -1.5 | -4.5  | -6.5  | -2.8 | -3.6  | -5.0  | -5.1  | -5.1  | -3.0  | -4.6  | -4.7  |
| Peptide-MeNH2                             | -7.6 <sup>a</sup>  | -0.8 | -1.8 | -2.6 | -3.9  | -8.9  | -3.3 | -3.7  | -5.2  | -5.4  | -5.4  | -4.0  | -5.8  | -6.0  |
| Peptide-Peptide                           | -8.7 <sup>a</sup>  | -1.3 | -4.1 | -3.7 | -5.7  | -9.2  | -3.8 | -5.7  | -9.2  | -8.6  | -8.5  | -4.6  | -7.3  | -7.0  |
| Peptide-Water                             | -5.2 <sup>a</sup>  | -0.8 | -3.6 | -2.0 | -4.0  | -6.2  | -3.3 | -4.0  | -4.8  | -4.9  | -4.9  | -3.5  | -4.4  | -4.5  |
| Uracil-Uracil_LP                          | -17.4 <sup>a</sup> | -1.9 | -8.1 | -6.8 | -10.4 | -15.6 | -7.7 | -15.5 | -17.2 | -17.5 | -17.6 | -15.6 | -17.7 | -18.6 |
| Water-Pyridine                            | -7.0 <sup>a</sup>  | -1.1 | -2.4 | -2.3 | -4.4  | -6.6  | -4.4 | -4.0  | -4.8  | -4.9  | -4.9  | -5.5  | -6.4  | -6.7  |
| MeOH-Pyridine                             | -7.5 <sup>a</sup>  | -0.8 | -1.4 | -2.1 | -3.6  | -6.2  | -3.2 | -3.4  | -4.5  | -4.7  | -4.7  | -5.6  | -6.9  | -7.3  |

. . . continued on next page . . .

Table S28: ... continued from previous page ...

| Complex                 | Ref.               | MND0 | AMI  | PM3  | PM6   | PM7   | OM1  | OM2   |       | OM3   |       | D3T   | D3T   |       |
|-------------------------|--------------------|------|------|------|-------|-------|------|-------|-------|-------|-------|-------|-------|-------|
|                         |                    |      |      |      |       |       |      | D2    | D3    | D2    | D3    |       |       |       |
| AcOH-AcOH               | -19.4 <sup>a</sup> | -1.5 | -6.4 | -8.9 | -10.1 | -17.5 | -6.7 | -15.2 | -16.7 | -16.7 | -16.8 | -19.7 | -20.1 | -20.2 |
| AcNH2-AcNH2             | -16.5 <sup>a</sup> | -2.1 | -8.4 | -5.1 | -10.6 | -15.2 | -6.9 | -13.3 | -14.9 | -14.8 | -14.8 | -14.5 | -15.4 | -15.4 |
| AcOH-Uracil             | -19.8 <sup>a</sup> | -2.0 | -8.1 | -8.8 | -11.1 | -17.5 | -8.0 | -16.8 | -18.4 | -18.5 | -18.6 | -20.2 | -20.9 | -20.9 |
| AcNH2-Uracil            | -19.5 <sup>a</sup> | -2.6 | -9.8 | -7.5 | -12.7 | -18.0 | -9.0 | -16.8 | -18.5 | -18.7 | -18.7 | -19.0 | -19.8 | -19.8 |
| Benzene-Benzene-pi-pi   | -2.7 <sup>a</sup>  | -0.0 | -0.0 | -2.4 | -0.9  | -4.8  | -0.2 | -0.6  | -2.5  | -2.9  | -2.9  | -2.6  | -3.6  | -3.5  |
| Pyridine-Pyridine-pi-pi | -3.8 <sup>a</sup>  | -0.2 | -0.8 | -2.7 | -2.8  | -5.8  | -1.2 | -2.7  | -4.2  | -4.4  | -4.3  | -4.2  | -5.2  | -5.0  |
| Uracil-Uracil-pi-pi     | -9.8 <sup>a</sup>  | -2.0 | -5.9 | -4.4 | -4.4  | -15.6 | -5.9 | -4.6  | -11.0 | -10.8 | -10.6 | -10.2 | -11.0 | -10.8 |
| Benzene-Pyridine-pi-pi  | -3.3 <sup>a</sup>  | -0.0 | -0.7 | -3.8 | -1.0  | -5.3  | -0.7 | -1.3  | -3.3  | -3.6  | -3.5  | -3.5  | -4.5  | -4.3  |
| Benzene-Uracil-pi-pi    | -5.6 <sup>a</sup>  | -0.2 | -2.3 | -2.0 | -2.7  | -6.3  | -1.7 | -3.4  | -6.8  | -6.7  | -6.6  | -6.1  | -7.4  | -7.3  |
| Pyridine-Uracil-pi-pi   | -6.7 <sup>a</sup>  | -1.5 | -3.1 | -2.9 | -7.5  | -7.4  | -5.6 | -9.2  | -7.9  | -8.0  | -7.8  | -7.2  | -8.2  | -8.0  |
| Benzene-Ethene          | -1.4 <sup>a</sup>  | 0.0  | 0.0  | -0.0 | -0.6  | -2.2  | 0.0  | 0.0   | -0.9  | -1.2  | -1.1  | -1.3  | -1.9  | -1.8  |
| Uracil-Ethene           | -3.3 <sup>a</sup>  | -0.0 | -2.0 | -1.9 | -2.4  | -2.9  | -1.0 | -3.9  | -4.0  | -3.9  | -3.9  | -3.5  | -4.1  | -4.0  |
| Uracil-Ethene           | -3.7 <sup>a</sup>  | -0.3 | -2.4 | -1.8 | -2.3  | -2.4  | -1.9 | -5.8  | -4.7  | -4.7  | -4.7  | -3.9  | -4.4  | -4.4  |
| Pyridine-Ethene         | -1.8 <sup>a</sup>  | -0.0 | -0.0 | -1.1 | -1.0  | -2.5  | -0.2 | -0.9  | -1.8  | -2.2  | -2.2  | -1.9  | -2.5  | -2.4  |
| Pentane-Pentane         | -3.8 <sup>a</sup>  | -0.0 | -0.8 | -3.6 | -0.8  | -4.1  | -0.0 | -0.5  | -4.6  | -4.7  | -4.5  | -3.5  | -3.6  | -3.5  |
| Neopentane-Pentane      | -2.6 <sup>a</sup>  | -0.0 | -1.0 | -4.8 | -2.1  | -3.6  | -0.0 | -1.2  | -3.8  | -4.1  | -4.0  | -2.9  | -3.0  | -2.9  |
| Neopentane-Neopentane   | -1.8 <sup>a</sup>  | -0.0 | -1.0 | -3.0 | -2.8  | -3.2  | -0.0 | -1.5  | -3.5  | -3.8  | -3.7  | -2.6  | -2.7  | -2.6  |
| Cyclopentane-Neopentane | -2.4 <sup>a</sup>  | -0.0 | -0.9 | -3.2 | -0.7  | -3.6  | -0.0 | -1.4  | -3.6  | -4.0  | -3.9  | -2.8  | -3.0  | -2.9  |
| Cyclopentane-           |                    |      |      |      |       |       |      |       |       |       |       |       |       |       |
| Cyclopentane            | -3.0 <sup>a</sup>  | -0.0 | -0.6 | -3.4 | -1.3  | -3.9  | -0.0 | -1.2  | -4.1  | -4.5  | -4.4  | -3.0  | -3.3  | -3.2  |
| Benzene-Cyclopentane    | -3.5 <sup>a</sup>  | -0.0 | -0.0 | -4.4 | -0.6  | -4.5  | -0.0 | -0.0  | -3.4  | -3.7  | -3.5  | -2.9  | -3.5  | -3.3  |
| Benzene-Neopentane      | -2.8 <sup>a</sup>  | -0.0 | -0.7 | -4.7 | -0.8  | -4.5  | -0.0 | -0.4  | -3.4  | -3.8  | -3.7  | -2.7  | -3.3  | -3.2  |
| Uracil-Pentane          | -4.8 <sup>a</sup>  | -0.0 | -1.4 | -3.0 | -2.6  | -5.2  | -0.3 | -1.4  | -4.9  | -5.1  | -4.9  | -4.8  | -5.1  | -4.9  |
| Uracil-Cyclopentane     | -4.1 <sup>a</sup>  | -0.0 | -1.8 | -2.1 | -3.5  | -4.9  | -0.2 | -1.7  | -4.2  | -4.5  | -4.3  | -4.2  | -4.4  | -4.2  |
| Uracil-Neopentane       | -3.7 <sup>a</sup>  | -0.0 | -1.3 | -4.8 | -3.3  | -4.1  | -0.3 | -1.3  | -3.6  | -3.8  | -3.7  | -3.4  | -3.7  | -3.6  |
| Ethene-Pentane          | -2.0 <sup>a</sup>  | -0.0 | -0.6 | -2.1 | -0.6  | -2.2  | -0.0 | -0.8  | -2.3  | -2.4  | -2.4  | -1.8  | -1.9  | -1.9  |
| Ethene-Pentane          | -1.7 <sup>a</sup>  | -0.0 | -0.3 | -1.1 | -0.8  | -1.8  | -0.0 | -0.7  | -1.7  | -1.8  | -1.7  | -1.4  | -1.7  | -1.7  |
| Peptide-Pentane         | -4.3 <sup>a</sup>  | -0.0 | -0.9 | -4.6 | -1.6  | -4.1  | -0.3 | -0.9  | -4.3  | -4.5  | -4.3  | -3.6  | -3.8  | -3.7  |
| Benzene-Benzene-TS      | -2.8 <sup>a</sup>  | -0.0 | -0.4 | -3.8 | -0.9  | -4.8  | -0.1 | -0.7  | -3.0  | -3.3  | -3.3  | -2.3  | -3.6  | -3.5  |
| Pyridine-Pyridine-TS    | -3.5 <sup>a</sup>  | -0.3 | -0.7 | -3.6 | -1.3  | -5.8  | -1.2 | -2.0  | -3.2  | -3.5  | -3.5  | -4.2  | -5.2  | -5.0  |
| Benzene-Pyridine-TS     | -3.3 <sup>a</sup>  | -0.0 | -0.5 | -1.1 | -1.2  | -5.3  | -0.3 | -1.1  | -3.5  | -3.8  | -3.8  | -2.7  | -3.3  | -3.2  |
| Benzene-Ethene-CH-pi    | -2.9 <sup>a</sup>  | -0.0 | -0.5 | -1.2 | -1.0  | -2.0  | -0.4 | -2.0  | -3.4  | -3.5  | -3.5  | -2.3  | -2.5  | -2.5  |
| Ethene-Ethene-TS        | -1.5 <sup>a</sup>  | -0.0 | -0.5 | -1.1 | -0.4  | -0.8  | -0.3 | -1.9  | -2.6  | -2.6  | -2.6  | -1.4  | -1.7  | -1.7  |
| Benzene-AcOH-OH-pi      | -4.7 <sup>a</sup>  | -0.1 | -1.7 | -1.9 | -2.8  | -4.2  | -1.2 | -4.3  | -6.3  | -6.4  | -6.3  | -4.5  | -4.9  | -4.9  |
| Benzene-AcNH2-NH-pi     | -4.4 <sup>a</sup>  | -0.2 | -1.9 | -1.5 | -2.7  | -4.3  | -1.4 | -3.8  | -5.7  | -5.8  | -5.8  | -4.2  | -4.6  | -4.6  |
| Benzene-Water-OH-pi     | -3.3 <sup>a</sup>  | -0.1 | -1.3 | -1.8 | -2.6  | -3.0  | -1.3 | -2.9  | -4.9  | -4.7  | -4.7  | -3.8  | -3.9  | -3.9  |
| Benzene-MeOH-OH-pi      | -4.2 <sup>a</sup>  | -0.1 | -1.2 | -1.6 | -2.0  | -3.4  | -0.9 | -2.5  | -4.7  | -4.7  | -4.7  | -3.7  | -4.1  | -4.1  |
| Benzene-MeNH2-NH-pi     | -3.2 <sup>a</sup>  | -0.1 | -0.9 | -1.2 | -1.8  | -3.7  | -0.7 | -1.2  | -3.5  | -3.6  | -3.5  | -3.1  | -3.4  | -3.3  |
| Benzene-Peptide-NH-pi   | -5.3 <sup>a</sup>  | -0.1 | -0.9 | -1.7 | -2.2  | -5.5  | -0.9 | -2.3  | -5.1  | -5.5  | -5.4  | -4.1  | -4.6  | -4.5  |
| Pyridine-Pyridine-CH-N  | -4.2 <sup>a</sup>  | -0.2 | -1.3 | -2.7 | -2.8  | -3.8  | -1.6 | -2.7  | -4.0  | -4.2  | -4.3  | -3.6  | -4.0  | -4.0  |
| Ethene-Water-CH-O       | -2.9 <sup>a</sup>  | -0.2 | -1.8 | -1.0 | -1.7  | -1.4  | -1.8 | -4.3  | -4.8  | -4.8  | -4.8  | -3.7  | -3.9  | -3.9  |
| Ethene-AcOH-OH-pi       | -5.0 <sup>a</sup>  | -0.3 | -2.0 | -1.9 | -2.1  | -2.4  | -1.9 | -6.1  | -7.3  | -7.3  | -7.3  | -4.7  | -5.1  | -5.1  |
| Pentane-AcOH            | -2.9 <sup>a</sup>  | 0.0  | -0.8 | -2.7 | -2.3  | -3.1  | -0.3 | -1.0  | -4.0  | -3.9  | -3.8  | -3.3  | -3.5  | -3.4  |
| Pentane-AcNH2           | -3.5 <sup>a</sup>  | -0.0 | -1.0 | -2.4 | -1.9  | -3.5  | -0.3 | -0.8  | -3.9  | -4.0  | -3.9  | -3.4  | -3.5  | -3.4  |
| Benzene-AcOH            | -3.7 <sup>a</sup>  | -0.1 | -1.2 | -1.1 | -2.0  | -3.8  | -0.8 | -2.5  | -4.9  | -4.8  | -4.7  | -4.0  | -4.4  | -4.3  |

... continued on next page ...



Table S28: ... continued from previous page ...

| Complex                                                                         | Ref.               | MND0 | AM1   | PM3   | PM6   | PM7   | OM1   | OM2   |       | OM3   |       | OM3   | D3    | D3T   |
|---------------------------------------------------------------------------------|--------------------|------|-------|-------|-------|-------|-------|-------|-------|-------|-------|-------|-------|-------|
|                                                                                 |                    |      |       |       |       |       |       | D2    | D3    | D2    | D3    |       |       |       |
| Peptide-Ethene                                                                  | -3.0 <sup>a</sup>  | -0.0 | -0.9  | -3.5  | -1.7  | -2.4  | -0.6  | -2.1  | -3.5  | -3.6  | -1.2  | -2.9  | -3.1  | -3.1  |
| Pyridine-Ethyne                                                                 | -4.1 <sup>a</sup>  | -0.3 | -0.8  | -0.9  | -1.4  | -1.9  | -1.8  | -4.1  | -4.9  | -5.0  | -4.4  | -5.4  | -5.8  | -5.8  |
| MeNH2-Pyridine                                                                  | -4.0 <sup>a</sup>  | -0.6 | -1.8  | -1.1  | -2.8  | -6.0  | -2.4  | -2.1  | -3.2  | -3.3  | -1.7  | -2.9  | -3.2  | -3.1  |
| Full optimizations of dimers, single point calculations on fragments (monomers) |                    |      |       |       |       |       |       |       |       |       |       |       |       |       |
| Water-Water                                                                     | -5.0 <sup>a</sup>  | -1.0 | -5.5  | -3.6  | -5.1  | -6.6  | -4.3  | -4.4  | -4.8  | -4.8  | -4.5  | -5.1  | -5.1  | -5.1  |
| Water-MeOH                                                                      | -5.7 <sup>a</sup>  | -0.9 | -5.1  | -3.0  | -4.5  | -7.0  | -3.9  | -4.0  | -4.9  | -4.7  | -3.9  | -4.8  | -4.8  | -4.8  |
| Water-MeNH2                                                                     | -7.0 <sup>a</sup>  | -0.9 | -3.0  | -2.8  | -4.8  | -7.3  | -4.4  | -4.4  | -5.2  | -5.2  | -6.4  | -7.4  | -7.5  | -7.5  |
| Water-Peptide                                                                   | -8.2 <sup>a</sup>  | -1.4 | -6.1  | -4.4  | -7.2  | -9.4  | -5.2  | -7.0  | -8.1  | -8.0  | -6.7  | -7.7  | -8.0  | -8.0  |
| MeOH-MeOH                                                                       | -5.9 <sup>a</sup>  | -0.6 | -3.7  | -2.7  | -5.0  | -5.0  | -2.8  | -3.5  | -4.4  | -4.4  | -3.3  | -4.2  | -4.4  | -4.4  |
| MeOH-MeNH2                                                                      | -7.7 <sup>a</sup>  | -0.7 | -2.5  | -2.7  | -4.0  | -6.8  | -3.4  | -4.4  | -5.7  | -5.6  | -7.4  | -8.9  | -9.1  | -9.1  |
| MeOH-Peptide                                                                    | -8.3 <sup>a</sup>  | -1.1 | -4.2  | -3.9  | -6.3  | -8.6  | -4.0  | -6.6  | -7.8  | -7.8  | -6.5  | -7.8  | -8.1  | -8.1  |
| MeOH-Water                                                                      | -5.1 <sup>a</sup>  | -0.7 | -5.1  | -3.3  | -5.2  | -4.5  | -3.1  | -4.0  | -4.5  | -4.5  | -4.2  | -4.9  | -4.9  | -4.9  |
| MeNH2-MeOH                                                                      | -3.1 <sup>a</sup>  | -0.5 | -2.5  | -2.7  | -3.0  | -5.2  | -2.2  | -4.4  | -3.0  | -3.0  | -7.4  | -2.8  | -2.7  | -2.7  |
| MeNH2-MeNH2                                                                     | -4.2 <sup>a</sup>  | -0.5 | -1.7  | -1.3  | -2.9  | -6.4  | -2.4  | -1.8  | -2.8  | -3.0  | -2.9  | -2.9  | -3.1  | -3.0  |
| MeNH2-Peptide                                                                   | -5.5 <sup>a</sup>  | -0.8 | -3.6  | -1.8  | -4.4  | -7.5  | -3.1  | -3.6  | -5.1  | -5.1  | -2.7  | -4.6  | -4.7  | -4.7  |
| MeNH2-Water                                                                     | -7.4 <sup>a</sup>  | -0.9 | -2.8  | -2.8  | -4.8  | -7.3  | -4.4  | -4.4  | -5.1  | -5.1  | -6.4  | -7.4  | -7.5  | -7.5  |
| Peptide-MeOH                                                                    | -6.3 <sup>a</sup>  | -0.7 | -3.4  | -1.7  | -4.8  | -6.7  | -2.9  | -3.8  | -5.2  | -5.2  | -3.2  | -4.7  | -4.8  | -4.8  |
| Peptide-MeNH2                                                                   | -7.6 <sup>a</sup>  | -0.8 | -1.9  | -3.1  | -4.2  | -9.2  | -3.3  | -3.9  | -5.4  | -5.5  | -4.2  | -6.0  | -6.3  | -6.3  |
| Peptide-Peptide                                                                 | -8.7 <sup>a</sup>  | -1.3 | -4.3  | -4.0  | -6.4  | -9.7  | -3.9  | -6.0  | -9.8  | -9.5  | -4.9  | -7.8  | -8.1  | -7.5  |
| Peptide-Water                                                                   | -5.2 <sup>a</sup>  | -0.8 | -3.8  | -2.1  | -4.3  | -6.4  | -3.2  | -4.1  | -4.9  | -4.9  | -3.7  | -4.6  | -4.7  | -4.7  |
| Uracyl-UracylBP                                                                 | -17.4 <sup>a</sup> | -2.0 | -8.3  | -7.8  | -11.4 | -16.4 | -8.0  | -17.4 | -19.3 | -19.6 | -22.2 | -24.7 | -25.6 | -25.6 |
| Water-Pyridine                                                                  | -7.0 <sup>a</sup>  | -1.1 | -2.4  | -2.4  | -4.4  | -6.7  | -4.4  | -4.0  | -4.8  | -4.9  | -5.6  | -6.6  | -6.9  | -6.9  |
| MeOH-Pyridine                                                                   | -7.5 <sup>a</sup>  | -0.8 | -1.4  | -2.2  | -3.7  | -6.2  | -3.3  | -3.5  | -4.6  | -4.8  | -6.1  | -7.4  | -7.9  | -7.9  |
| AcOH-AcOH                                                                       | -19.4 <sup>a</sup> | -1.6 | -6.6  | -6.6  | -9.9  | -12.4 | -19.7 | -7.1  | -20.0 | -21.8 | -21.7 | -21.7 | -21.7 | -21.7 |
| AcNH2-AcNH2                                                                     | -16.5 <sup>a</sup> | -2.1 | -8.4  | -5.9  | -11.6 | -16.0 | -7.3  | -14.5 | -16.1 | -16.2 | -16.1 | -18.1 | -18.8 | -18.8 |
| AcOH-Uracyl                                                                     | -19.8 <sup>a</sup> | -2.1 | -8.3  | -10.0 | -12.7 | -19.2 | -8.4  | -20.2 | -22.0 | -22.1 | -35.2 | -37.4 | -37.0 | -37.0 |
| AcNH2-Uracyl                                                                    | -19.5 <sup>a</sup> | -2.4 | -10.1 | -8.7  | -13.9 | -19.1 | -9.4  | -18.7 | -20.5 | -20.7 | -22.9 | -25.0 | -25.8 | -25.9 |
| Benzene-Benzene-pi-pi                                                           | -2.7 <sup>a</sup>  | -0.0 | -0.0  | -2.4  | -0.9  | -4.8  | -0.2  | -0.7  | -2.5  | -3.0  | -0.0  | -2.7  | -3.6  | -3.5  |
| Pyridine-Pyridine-pi-pi                                                         | -3.8 <sup>a</sup>  | -0.2 | -0.8  | -2.7  | -2.8  | -5.8  | -1.2  | -2.8  | -4.2  | -4.4  | -1.9  | -4.3  | -5.2  | -5.1  |
| Uracyl-Uracyl-pi-pi                                                             | -9.8 <sup>a</sup>  | -2.0 | -6.0  | -4.5  | -4.9  | -16.4 | -6.7  | -5.6  | -12.4 | -12.1 | -4.6  | -11.3 | -12.1 | -11.9 |
| Benzene-Pyridine-pi-pi                                                          | -3.3 <sup>a</sup>  | -0.0 | -0.7  | -3.8  | -1.0  | -5.3  | -0.7  | -1.3  | -3.4  | -3.7  | -1.2  | -3.5  | -4.5  | -4.3  |
| Benzene-Uracyl-pi-pi                                                            | -5.6 <sup>a</sup>  | -0.2 | -2.3  | -2.0  | -2.7  | -6.3  | -1.8  | -3.5  | -7.2  | -7.0  | -3.2  | -6.3  | -7.6  | -7.5  |
| Pyridine-Uracyl-pi-pi                                                           | -6.7 <sup>a</sup>  | -1.5 | -3.2  | -3.0  | -7.7  | -7.5  | -5.7  | -9.7  | -8.2  | -8.2  | -12.1 | -7.4  | -8.3  | -8.2  |
| Benzene-Ethene                                                                  | -1.4 <sup>a</sup>  | 0.0  | 0.0   | -0.0  | -0.6  | -2.2  | 0.0   | 0.0   | -1.0  | -1.2  | 0.0   | -1.3  | -1.9  | -1.8  |
| Uracyl-Ethene                                                                   | -3.3 <sup>a</sup>  | 0.0  | -2.0  | -1.9  | -2.5  | -2.9  | -1.1  | -4.0  | -4.1  | -4.1  | -2.4  | -3.6  | -4.1  | -4.1  |
| Uracyl-Ethyne                                                                   | -3.7 <sup>a</sup>  | -0.3 | -2.4  | -1.9  | -2.4  | -2.4  | -1.9  | -6.0  | -4.9  | -4.9  | -3.6  | -4.0  | -4.6  | -4.5  |
| Pyridine-Ethene                                                                 | -1.8 <sup>a</sup>  | -0.0 | -0.0  | -1.1  | -1.0  | -2.5  | -0.2  | -1.0  | -1.8  | -2.2  | -0.4  | -1.9  | -2.5  | -2.4  |
| Pentane-Pentane                                                                 | -3.8 <sup>a</sup>  | -0.0 | -0.8  | -3.7  | -0.8  | -4.1  | -0.0  | -0.5  | -4.6  | -4.7  | 0.0   | -3.5  | -3.6  | -3.5  |
| Neopentane-Pentane                                                              | -2.6 <sup>a</sup>  | -0.0 | -1.0  | -5.0  | -2.2  | -3.6  | -0.0  | -1.2  | -3.9  | -4.1  | -0.0  | -2.9  | -3.0  | -2.9  |
| Neopentane-Neopentane                                                           | -1.8 <sup>a</sup>  | -0.0 | -1.0  | -3.1  | -2.9  | -3.2  | -0.0  | -1.5  | -3.5  | -3.8  | -0.0  | -2.6  | -2.7  | -2.6  |
| Cyclopentane-Neopentane                                                         | -2.4 <sup>a</sup>  | -0.0 | -0.9  | -3.2  | -0.8  | -3.7  | -0.0  | -1.4  | -3.6  | -4.0  | -0.0  | -2.8  | -3.0  | -2.9  |
| Cyclopentane-Cyclopentane                                                       | -3.0 <sup>a</sup>  | -0.0 | -0.6  | -3.4  | -1.3  | -3.9  | -0.0  | -1.2  | -4.2  | -4.6  | -0.2  | -3.0  | -3.4  | -3.2  |
| Benzene-Cyclopentane                                                            | -3.5 <sup>a</sup>  | -0.0 | -0.0  | -4.5  | -0.6  | -4.6  | -0.0  | -0.0  | -3.4  | -3.7  | -0.0  | -2.9  | -3.5  | -3.3  |
| Benzene-Neopentane                                                              | -2.8 <sup>a</sup>  | -0.0 | -0.7  | -4.7  | -0.8  | -4.5  | -0.0  | -0.4  | -3.4  | -3.9  | -0.1  | -2.7  | -3.3  | -3.2  |

... continued on next page ...

Table S28: . . . continued from previous page . . .

| Complex                | Ref.              | MINDO | AMI  | PM3  | PM6  | PM7  | OM1  |      | OM2  |      | OM3  |      | OM3  |      |
|------------------------|-------------------|-------|------|------|------|------|------|------|------|------|------|------|------|------|
|                        |                   |       |      |      |      |      | OM1  | OM2  | D2   | D3   | D2   | D3   | D2   | D3   |
| Uracil-Pentane         | -4.8 <sup>a</sup> | -0.0  | -1.7 | -3.1 | -2.9 | -5.3 | -0.3 | -1.5 | -5.1 | -5.3 | -0.8 | -4.9 | -5.2 | -5.0 |
| Uracil-Cyclopentane    | -4.1 <sup>a</sup> | -0.0  | -1.9 | -2.2 | -3.7 | -5.0 | -0.2 | -1.8 | -4.3 | -4.6 | -0.5 | -4.3 | -4.5 | -4.3 |
| Uracil-Neopentane      | -3.7 <sup>a</sup> | -0.0  | -1.3 | -4.9 | -2.5 | -4.2 | -0.3 | -1.3 | -3.7 | -3.9 | -0.5 | -3.4 | -3.8 | -3.6 |
| Ethene-Pentane         | -2.0 <sup>a</sup> | -0.0  | -0.6 | -2.1 | -0.6 | -2.3 | -0.0 | -0.8 | -2.3 | -2.4 | -0.1 | -1.8 | -1.9 | -1.9 |
| Ethylene-Pentane       | -1.7 <sup>a</sup> | -0.0  | -0.3 | -1.1 | -0.9 | -1.8 | -0.0 | -0.7 | -1.7 | -1.8 | 0.0  | -1.4 | -1.7 | -1.7 |
| Peptide-Pentane        | -4.3 <sup>a</sup> | -0.0  | -1.1 | -4.8 | -1.9 | -4.3 | -0.3 | -0.9 | -4.4 | -4.6 | -0.4 | -3.7 | -3.9 | -3.7 |
| Benzene-Benzene_TS     | -2.8 <sup>a</sup> | -0.0  | -0.4 | -3.9 | -0.9 | -4.8 | -0.1 | -0.7 | -3.0 | -3.3 | -0.3 | -2.3 | -3.6 | -3.5 |
| Pyridine-Pyridine_TS   | -3.5 <sup>a</sup> | -0.3  | -0.7 | -3.6 | -1.3 | -5.8 | -1.2 | -2.1 | -3.2 | -3.5 | -1.9 | -4.3 | -5.2 | -5.1 |
| Benzene-Pyridine_TS    | -3.3 <sup>a</sup> | -0.0  | -0.5 | -1.1 | -1.2 | -5.3 | -0.3 | -1.1 | -3.6 | -3.9 | -0.6 | -2.7 | -3.3 | -3.2 |
| Benzene-Ethylene_CH-pi | -2.9 <sup>a</sup> | -0.0  | -0.5 | -1.2 | -1.0 | -2.0 | -0.4 | -2.1 | -3.4 | -3.5 | -0.9 | -2.3 | -2.5 | -2.5 |
| Ethylene-Ethylene_TS   | -1.5 <sup>a</sup> | -0.0  | -0.5 | -1.1 | -0.4 | -0.8 | -0.4 | -1.9 | -2.6 | -2.7 | -0.8 | -1.4 | -1.7 | -1.7 |
| Benzene-AcOH_OH-pi     | -4.7 <sup>a</sup> | -0.1  | -1.7 | -1.9 | -2.9 | -4.2 | -1.2 | -4.4 | -6.4 | -6.5 | -2.5 | -4.6 | -5.1 | -5.0 |
| Benzene-AcNH2_NH-pi    | -4.4 <sup>a</sup> | -0.2  | -1.9 | -1.5 | -2.8 | -4.3 | -1.4 | -3.8 | -5.8 | -5.9 | -2.3 | -4.2 | -4.6 | -4.6 |
| Benzene-Water_OH-pi    | -3.3 <sup>a</sup> | -0.1  | -1.3 | -1.8 | -2.7 | -3.0 | -1.3 | -3.0 | -4.9 | -4.7 | -1.9 | -3.8 | -3.9 | -3.9 |
| Benzene-MeOH_OH-pi     | -4.2 <sup>a</sup> | -0.1  | -1.2 | -1.6 | -2.0 | -3.5 | -0.9 | -2.5 | -4.7 | -4.8 | -1.5 | -3.8 | -4.2 | -4.1 |
| Benzene-MeNH2_NH-pi    | -3.2 <sup>a</sup> | -0.1  | -0.9 | -1.2 | -1.8 | -3.7 | -0.7 | -1.2 | -3.6 | -3.6 | -0.7 | -3.1 | -3.4 | -3.3 |
| Benzene-Peptide_NH-pi  | -5.3 <sup>a</sup> | -0.1  | -1.0 | -1.8 | -2.3 | -5.6 | -0.9 | -2.4 | -5.2 | -5.5 | -1.3 | -4.2 | -4.7 | -4.6 |
| Pyridine-Pyridine_CH-N | -4.2 <sup>a</sup> | -0.2  | -1.3 | -2.7 | -2.8 | -3.8 | -1.6 | -2.8 | -4.1 | -4.3 | -2.1 | -3.6 | -4.0 | -4.1 |
| Ethylene-Water_CH-O    | -2.9 <sup>a</sup> | -0.2  | -1.8 | -1.0 | -1.7 | -1.4 | -1.8 | -4.4 | -4.8 | -4.8 | -3.3 | -3.8 | -3.9 | -3.9 |
| Ethylene-AcOH_OH-pi    | -5.0 <sup>a</sup> | -0.3  | -2.0 | -1.9 | -2.2 | -2.4 | -1.9 | -6.3 | -7.5 | -7.5 | -3.6 | -4.8 | -5.2 | -5.2 |
| Pentane-AcOH           | -2.9 <sup>a</sup> | 0.0   | -0.8 | -3.0 | -2.6 | -3.2 | -0.3 | -1.1 | -4.1 | -4.0 | -0.4 | -3.4 | -3.5 | -3.4 |
| Pentane-AcNH2          | -3.5 <sup>a</sup> | -0.0  | -1.1 | -2.4 | -2.3 | -3.7 | -0.3 | -0.9 | -4.1 | -4.2 | -0.6 | -3.4 | -3.6 | -3.5 |
| Benzene-AcOH           | -3.7 <sup>a</sup> | -0.1  | -1.3 | -1.1 | -2.1 | -3.8 | -0.8 | -2.6 | -5.0 | -4.9 | -1.4 | -4.0 | -4.5 | -4.4 |
| Peptide-Ethene         | -3.0 <sup>a</sup> | -0.0  | -0.9 | -3.6 | -1.8 | -2.5 | -0.6 | -2.2 | -3.7 | -3.7 | -1.2 | -2.9 | -3.2 | -3.1 |
| Pyridine-Ethylene      | -4.1 <sup>a</sup> | -0.3  | -0.8 | -0.9 | -1.4 | -1.9 | -1.8 | -4.1 | -4.9 | -5.1 | -4.7 | -5.7 | -6.2 | -6.2 |
| MeNH2-Pyridine         | -4.0 <sup>a</sup> | -0.7  | -1.8 | -1.1 | -2.8 | -6.1 | -2.4 | -2.1 | -3.3 | -3.3 | -1.7 | -2.9 | -3.2 | -3.1 |

a J.Rezac, K.E.Riley, and P.Hobza, J.Chem.Theory Comput. 7, 2427 (2011) ; 7, 3466 (2011).

Table S29: Benchmark Results for the S66a8 Data Set. Interaction Energies (kcal/mol)

| Complex             | Ref.              | MNDO | AM1  | PM3  | PM6  | PM7  | OM1  | OM2  |      | OM3  |      | OM3  | D3   | D3T  |
|---------------------|-------------------|------|------|------|------|------|------|------|------|------|------|------|------|------|
|                     |                   |      |      |      |      |      |      | D2   | D3   | D2   | D3   |      |      |      |
| Water-Water.1.y.-30 | -4.1 <sup>a</sup> | 3.3  | -3.2 | -1.6 | -3.4 | -4.3 | -3.1 | -3.2 | -3.6 | -3.6 | -3.6 | -3.9 | -4.0 | -4.0 |
| Water-Water.1.y.+30 | -4.1 <sup>a</sup> | 3.3  | -3.2 | -1.6 | -3.4 | -4.3 | -3.1 | -3.2 | -3.6 | -3.6 | -3.6 | -3.9 | -4.0 | -4.0 |
| Water-Water.1.z.-30 | -4.3 <sup>a</sup> | 3.5  | -3.4 | -1.8 | -3.7 | -4.7 | -3.4 | -3.5 | -3.9 | -3.9 | -3.9 | -4.3 | -4.4 | -4.4 |
| Water-Water.1.z.+30 | -4.2 <sup>a</sup> | 3.7  | -3.1 | -1.5 | -3.4 | -4.0 | -2.8 | -3.2 | -3.5 | -3.5 | -3.4 | -3.8 | -3.9 | -3.9 |
| Water-Water.2.y.-30 | -3.9 <sup>a</sup> | 5.4  | -2.8 | -1.4 | -3.1 | -4.2 | -2.2 | -3.2 | -3.6 | -3.6 | -3.2 | -3.6 | -3.7 | -3.7 |
| Water-Water.2.y.+30 | -3.9 <sup>a</sup> | 5.4  | -2.8 | -1.4 | -3.1 | -4.2 | -2.2 | -3.2 | -3.6 | -3.6 | -3.2 | -3.6 | -3.7 | -3.7 |
| Water-Water.2.z.-30 | -4.5 <sup>a</sup> | 5.9  | -3.1 | -2.0 | -3.5 | -4.6 | -2.4 | -3.3 | -3.7 | -3.7 | -3.3 | -3.8 | -3.8 | -3.8 |
| Water-Water.2.z.+30 | -4.7 <sup>a</sup> | 5.3  | -2.7 | -1.8 | -3.5 | -4.5 | -2.6 | -3.7 | -4.0 | -4.0 | -3.9 | -4.2 | -4.3 | -4.3 |
| Water-MeOH.1.y.-30  | -4.7 <sup>a</sup> | 4.7  | -3.0 | -1.5 | -3.9 | -4.8 | -2.8 | -3.4 | -3.9 | -3.9 | -3.4 | -4.0 | -4.1 | -4.1 |
| Water-MeOH.1.y.+30  | -4.8 <sup>a</sup> | 5.5  | -2.8 | -1.0 | -3.7 | -4.1 | -2.6 | -3.2 | -3.8 | -3.8 | -3.2 | -3.9 | -4.0 | -4.0 |
| Water-MeOH.1.z.-30  | -4.8 <sup>a</sup> | 5.2  | -3.1 | -1.6 | -4.1 | -5.0 | -2.9 | -3.6 | -4.2 | -4.2 | -3.7 | -4.3 | -4.4 | -4.4 |
| Water-MeOH.1.z.+30  | -4.9 <sup>a</sup> | 5.8  | -2.7 | -1.0 | -3.6 | -4.0 | -2.4 | -3.1 | -3.7 | -3.7 | -3.0 | -3.7 | -3.8 | -3.8 |
| Water-MeOH.2.y.-30  | -4.4 <sup>a</sup> | 6.3  | -2.3 | -1.0 | -3.1 | -4.0 | -1.5 | -3.0 | -3.4 | -3.4 | -2.6 | -3.2 | -3.2 | -3.2 |
| Water-MeOH.2.y.+30  | -3.3 <sup>a</sup> | 7.1  | -2.7 | -0.9 | -3.2 | -4.3 | -1.4 | -2.7 | -3.4 | -3.3 | -2.3 | -3.2 | -3.2 | -3.2 |
| Water-MeOH.2.z.-30  | -4.7 <sup>a</sup> | 9.7  | -2.8 | -0.9 | -3.6 | -4.7 | -1.3 | -3.0 | -3.8 | -3.7 | -2.4 | -3.4 | -3.4 | -3.4 |
| Water-MeOH.2.z.+30  | -5.3 <sup>a</sup> | 6.7  | -2.1 | -1.7 | -3.6 | -4.4 | -2.0 | -3.6 | -4.1 | -4.1 | -3.5 | -4.0 | -4.1 | -4.1 |
| Water-MeNH2.1.y.-30 | -5.6 <sup>a</sup> | 3.6  | -1.1 | -1.2 | -4.1 | -6.1 | -2.9 | -3.5 | -4.0 | -4.1 | -3.9 | -4.6 | -4.7 | -4.7 |
| Water-MeNH2.1.y.+30 | -5.8 <sup>a</sup> | 3.6  | -1.4 | -1.5 | -4.6 | -6.8 | -3.6 | -4.1 | -4.6 | -4.7 | -4.6 | -5.3 | -5.4 | -5.4 |
| Water-MeNH2.1.z.-30 | -5.8 <sup>a</sup> | 4.3  | -0.8 | -1.0 | -3.7 | -5.7 | -2.4 | -3.3 | -3.8 | -3.8 | -3.6 | -4.2 | -4.4 | -4.4 |
| Water-MeNH2.1.z.+30 | -5.6 <sup>a</sup> | 6.4  | -0.1 | -0.8 | -3.1 | -5.8 | -1.6 | -3.1 | -3.7 | -3.8 | -3.5 | -4.3 | -4.4 | -4.4 |
| Water-MeNH2.2.y.-30 | -5.6 <sup>a</sup> | 6.6  | -0.1 | -0.8 | -3.1 | -5.8 | -1.5 | -3.1 | -3.7 | -3.8 | -3.5 | -4.3 | -4.4 | -4.4 |
| Water-MeNH2.2.y.+30 | -5.6 <sup>a</sup> | 6.0  | -0.4 | -0.7 | -2.9 | -5.5 | -2.0 | -3.3 | -3.9 | -3.9 | -3.8 | -4.5 | -4.6 | -4.6 |
| Water-MeNH2.2.z.-30 | -5.6 <sup>a</sup> | 8.3  | 0.0  | -0.9 | -3.0 | -5.6 | -0.8 | -2.7 | -3.5 | -3.5 | -2.8 | -3.8 | -3.9 | -3.9 |
| Water-MeNH2.2.z.+30 | -4.3 <sup>a</sup> | 3.9  | -2.9 | -1.4 | -2.9 | -3.9 | -2.8 | -2.8 | -3.2 | -3.2 | -3.0 | -3.5 | -3.6 | -3.6 |
| MeOH-Water.1.y.-30  | -4.3 <sup>a</sup> | 3.9  | -2.9 | -1.4 | -2.9 | -3.8 | -2.8 | -2.8 | -3.2 | -3.2 | -3.0 | -3.5 | -3.6 | -3.6 |
| MeOH-Water.1.y.+30  | -4.3 <sup>a</sup> | 3.9  | -2.9 | -1.4 | -2.9 | -3.8 | -2.8 | -2.8 | -3.2 | -3.2 | -3.0 | -3.5 | -3.6 | -3.6 |
| MeOH-Water.1.z.-30  | -4.5 <sup>a</sup> | 4.5  | -2.8 | -1.2 | -2.8 | -3.7 | -2.9 | -2.7 | -3.2 | -3.2 | -3.0 | -3.6 | -3.7 | -3.7 |
| MeOH-Water.1.z.+30  | -4.4 <sup>a</sup> | 4.2  | -2.9 | -1.5 | -3.0 | -3.9 | -2.8 | -2.9 | -3.3 | -3.3 | -3.1 | -3.5 | -3.6 | -3.6 |
| MeOH-Water.2.y.-30  | -4.0 <sup>a</sup> | 6.0  | -2.4 | -1.2 | -2.5 | -3.7 | -1.9 | -2.7 | -3.2 | -3.2 | -2.6 | -3.2 | -3.2 | -3.2 |
| MeOH-Water.2.y.+30  | -4.0 <sup>a</sup> | 6.0  | -2.4 | -1.3 | -2.5 | -3.7 | -1.9 | -2.7 | -3.2 | -3.2 | -2.6 | -3.2 | -3.2 | -3.2 |
| MeOH-Water.2.z.-30  | -4.7 <sup>a</sup> | 6.4  | -2.7 | -2.0 | -3.0 | -4.2 | -2.2 | -2.8 | -3.3 | -3.3 | -2.8 | -3.4 | -3.4 | -3.4 |
| MeOH-Water.2.z.+30  | -4.8 <sup>a</sup> | 5.8  | -2.3 | -1.9 | -2.8 | -3.9 | -2.5 | -3.2 | -3.6 | -3.6 | -3.4 | -3.8 | -4.0 | -3.9 |
| MeNH2-Water.1.y.-30 | -6.1 <sup>a</sup> | 7.3  | -0.5 | -0.8 | -3.4 | -5.9 | -1.8 | -3.4 | -4.2 | -4.1 | -3.6 | -4.6 | -4.6 | -4.6 |
| MeNH2-Water.1.y.+30 | -6.1 <sup>a</sup> | 7.2  | -0.4 | -0.8 | -3.4 | -5.9 | -1.7 | -3.3 | -4.0 | -4.0 | -3.5 | -4.5 | -4.5 | -4.5 |
| MeNH2-Water.1.z.-30 | -4.3 <sup>a</sup> | 6.3  | -2.0 | -0.9 | -3.8 | -5.7 | -2.0 | -2.9 | -3.8 | -3.7 | -2.6 | -3.7 | -3.6 | -3.6 |
| MeNH2-Water.1.z.+30 | -6.0 <sup>a</sup> | 4.8  | -0.2 | -0.8 | -3.0 | -5.5 | -1.9 | -3.0 | -3.5 | -3.6 | -3.5 | -4.1 | -4.2 | -4.2 |
| MeNH2-Water.2.y.-30 | -5.9 <sup>a</sup> | 6.6  | -0.6 | -0.9 | -3.8 | -5.8 | -2.3 | -3.6 | -4.4 | -4.4 | -4.0 | -4.9 | -5.0 | -5.0 |
| MeNH2-Water.2.y.+30 | -5.8 <sup>a</sup> | 6.3  | -0.8 | -1.0 | -4.0 | -6.0 | -2.6 | -3.8 | -4.5 | -4.5 | -4.2 | -5.0 | -5.2 | -5.2 |
| MeNH2-Water.2.z.-30 | -6.0 <sup>a</sup> | 5.5  | -1.3 | -1.8 | -4.6 | -7.2 | -3.1 | -4.3 | -5.0 | -5.0 | -4.8 | -5.6 | -5.8 | -5.8 |
| MeNH2-Water.2.z.+30 | -6.0 <sup>a</sup> | 7.6  | -0.3 | -0.0 | -3.4 | -4.8 | -1.9 | -3.1 | -3.9 | -3.8 | -3.3 | -4.3 | -4.4 | -4.4 |
| MeOH-MeOH.1.y.-30   | -4.9 <sup>a</sup> | 5.5  | -2.5 | -1.4 | -3.3 | -4.5 | -2.5 | -2.8 | -3.5 | -3.5 | -2.9 | -3.6 | -3.7 | -3.7 |
| MeOH-MeOH.1.y.+30   | -5.0 <sup>a</sup> | 6.1  | -2.5 | -0.9 | -3.2 | -3.9 | -2.5 | -2.8 | -3.6 | -3.6 | -2.7 | -3.7 | -3.8 | -3.8 |
| MeOH-MeOH.1.z.-30   | -5.2 <sup>a</sup> | 6.7  | -2.4 | -1.0 | -3.2 | -4.2 | -2.6 | -2.9 | -3.7 | -3.7 | -2.8 | -3.8 | -4.0 | -4.0 |

... continued on next page ...

Table S29: ... continued from previous page ...

| Complex               | Ref.              | MNDO | AMI  | PM3  | PM6  | PM7  | OM1  |      | OM2  |      | OM3  |      | OM3  |      | D3T |
|-----------------------|-------------------|------|------|------|------|------|------|------|------|------|------|------|------|------|-----|
|                       |                   |      |      |      |      |      | OM1  | OM2  | D2   | D3   | D3T  | D2   | D3   |      |     |
| MeOH-MeOH.1.z.+30     | -5.1 <sup>a</sup> | 6.1  | -2.5 | -1.3 | -3.3 | -4.2 | -2.3 | -2.9 | -3.5 | -3.5 | -2.8 | -3.5 | -3.7 | -3.7 |     |
| MeOH-MeOH.2.y.-30     | -4.8 <sup>a</sup> | 6.4  | -2.0 | -1.1 | -2.6 | -3.8 | -1.7 | -2.7 | -3.3 | -3.3 | -2.4 | -3.3 | -3.2 | -3.2 |     |
| MeOH-MeOH.2.y.+30     | -3.3 <sup>a</sup> | 7.7  | -2.2 | -0.7 | -2.5 | -4.0 | -1.0 | -2.0 | -2.9 | -2.8 | -1.5 | -2.8 | -2.6 | -2.6 |     |
| MeOH-MeOH.2.z.-30     | -5.4 <sup>a</sup> | 9.3  | -2.1 | -1.7 | -3.4 | -4.6 | -1.5 | -2.8 | -3.7 | -3.7 | -2.4 | -3.7 | -3.5 | -3.5 |     |
| MeOH-MeOH.2.z.+30     | -5.6 <sup>a</sup> | 8.2  | -1.6 | -1.9 | -3.0 | -4.1 | -1.9 | -3.2 | -3.9 | -3.9 | -2.9 | -3.9 | -3.8 | -3.9 |     |
| MeOH-MeNH2.1.y.-30    | -6.3 <sup>a</sup> | 5.2  | -0.7 | -1.3 | -3.3 | -5.7 | -2.8 | -3.1 | -4.0 | -4.1 | -3.5 | -4.6 | -4.8 | -4.8 |     |
| MeOH-MeNH2.1.y.+30    | -6.3 <sup>a</sup> | 5.2  | -0.7 | -1.3 | -3.3 | -5.7 | -2.8 | -3.1 | -4.0 | -4.1 | -3.5 | -4.6 | -4.8 | -4.8 |     |
| MeOH-MeNH2.1.z.-30    | -5.6 <sup>a</sup> | 5.9  | -1.2 | -1.1 | -3.1 | -5.1 | -2.5 | -2.5 | -3.8 | -3.7 | -2.4 | -4.1 | -4.1 | -4.0 |     |
| MeOH-MeNH2.1.z.+30    | -6.4 <sup>a</sup> | 5.1  | -0.6 | -1.4 | -3.3 | -5.9 | -2.5 | -3.2 | -3.8 | -4.0 | -3.7 | -4.5 | -4.7 | -4.7 |     |
| MeOH-MeNH2.2.y.-30    | -6.2 <sup>a</sup> | 8.2  | 0.3  | -1.0 | -2.3 | -5.2 | -1.4 | -2.6 | -3.6 | -3.7 | -3.0 | -4.3 | -4.4 | -4.4 |     |
| MeOH-MeNH2.2.y.+30    | -6.2 <sup>a</sup> | 8.3  | 0.3  | -1.0 | -2.3 | -5.2 | -1.3 | -2.6 | -3.6 | -3.7 | -3.0 | -4.3 | -4.4 | -4.4 |     |
| MeOH-MeNH2.2.z.-30    | -6.3 <sup>a</sup> | 6.4  | 0.0  | -0.8 | -2.2 | -5.1 | -1.9 | -2.9 | -3.6 | -3.7 | -3.5 | -4.4 | -4.5 | -4.5 |     |
| MeOH-MeNH2.2.z.+30    | -4.8 <sup>a</sup> | 9.0  | -0.6 | -0.8 | -2.4 | -5.0 | -0.9 | -1.8 | -3.2 | -3.1 | -1.3 | -3.1 | -3.0 | -3.0 |     |
| MeNH2-MeOH.1.y.-30    | -2.6 <sup>a</sup> | 3.1  | -1.7 | -0.6 | -2.0 | -4.3 | -1.5 | -1.3 | -2.0 | -2.2 | -1.3 | -2.2 | -2.3 | -2.3 |     |
| MeNH2-MeOH.1.y.+30    | -2.6 <sup>a</sup> | 3.2  | -1.4 | -0.5 | -1.7 | -3.3 | -1.2 | -1.0 | -1.8 | -1.9 | -1.0 | -1.9 | -2.0 | -2.0 |     |
| MeNH2-MeOH.1.z.-30    | -2.1 <sup>a</sup> | 2.8  | -0.7 | -0.8 | -1.0 | -2.6 | -0.7 | -0.7 | -1.5 | -1.6 | -0.5 | -1.6 | -1.7 | -1.7 |     |
| MeNH2-MeOH.1.z.+30    | -2.6 <sup>a</sup> | 3.1  | -1.9 | -0.3 | -2.1 | -4.5 | -1.4 | -1.4 | -1.9 | -2.0 | -1.3 | -1.9 | -2.1 | -2.1 |     |
| MeNH2-MeOH.2.y.-30    | -2.9 <sup>a</sup> | 4.9  | -1.5 | 0.1  | -1.8 | -4.1 | -0.9 | -1.1 | -1.9 | -2.1 | -0.9 | -1.9 | -2.1 | -2.0 |     |
| MeNH2-MeOH.2.y.+30    | -2.7 <sup>a</sup> | 4.5  | -1.9 | -0.6 | -2.1 | -4.3 | -1.1 | -1.3 | -2.2 | -2.3 | -1.1 | -2.1 | -2.2 | -2.2 |     |
| MeNH2-MeOH.2.z.-30    | -2.7 <sup>a</sup> | 3.4  | -2.0 | -0.1 | -2.1 | -4.3 | -1.3 | -1.5 | -2.0 | -2.1 | -1.3 | -2.0 | -2.1 | -2.1 |     |
| MeNH2-MeOH.2.z.+30    | -2.1 <sup>a</sup> | 4.5  | -0.9 | -0.8 | -1.2 | -3.3 | -0.5 | -0.7 | -1.7 | -1.8 | -0.4 | -1.7 | -1.7 | -1.7 |     |
| MeNH2-MeNH2.1.y.-30   | -3.1 <sup>a</sup> | 4.4  | -0.9 | -0.5 | -1.9 | -4.3 | -0.9 | -1.2 | -2.3 | -2.3 | -0.8 | -2.2 | -2.3 | -2.3 |     |
| MeNH2-MeNH2.1.y.+30   | -3.7 <sup>a</sup> | 5.0  | -0.4 | 0.5  | -2.0 | -4.8 | -1.1 | -1.5 | -2.4 | -2.5 | -1.3 | -2.5 | -2.5 | -2.5 |     |
| MeNH2-MeNH2.1.z.-30   | -3.2 <sup>a</sup> | 5.9  | -0.5 | 0.2  | -1.7 | -3.4 | -0.6 | -1.1 | -2.3 | -2.3 | -0.7 | -2.2 | -2.2 | -2.2 |     |
| MeNH2-MeNH2.1.z.+30   | -3.4 <sup>a</sup> | 3.8  | -0.6 | -0.2 | -2.4 | -6.2 | -1.6 | -1.7 | -2.5 | -2.7 | -1.7 | -2.7 | -2.8 | -2.8 |     |
| MeNH2-MeNH2.2.y.-30   | -3.2 <sup>a</sup> | 6.2  | -0.6 | 0.1  | -1.8 | -4.8 | -0.5 | -1.2 | -2.4 | -2.4 | -0.7 | -2.2 | -2.2 | -2.2 |     |
| MeNH2-MeNH2.2.y.+30   | -3.3 <sup>a</sup> | 5.6  | -0.1 | 0.6  | -1.5 | -4.6 | -0.6 | -1.2 | -2.1 | -2.2 | -1.0 | -2.2 | -2.3 | -2.3 |     |
| MeNH2-MeNH2.2.z.-30   | -3.1 <sup>a</sup> | 3.4  | 0.2  | 0.4  | -1.0 | -4.3 | -0.7 | -0.9 | -1.5 | -1.7 | -0.9 | -1.7 | -1.8 | -1.8 |     |
| MeNH2-MeNH2.2.z.+30   | -1.6 <sup>a</sup> | 3.1  | -0.5 | -0.5 | -1.4 | -3.1 | -0.3 | -1.0 | -1.7 | -1.8 | -0.7 | -1.6 | -1.7 | -1.7 |     |
| Water-Peptide.1.y.-30 | -6.8 <sup>a</sup> | 6.7  | -4.0 | -2.8 | -5.7 | -6.5 | -4.0 | -5.1 | -6.0 | -6.0 | -5.0 | -6.0 | -6.1 | -6.1 |     |
| Water-Peptide.1.y.+30 | -6.8 <sup>a</sup> | 6.8  | -4.0 | -2.8 | -5.7 | -6.5 | -4.1 | -5.2 | -6.0 | -6.0 | -5.0 | -6.0 | -6.1 | -6.1 |     |
| Water-Peptide.1.z.-30 | -6.8 <sup>a</sup> | 6.1  | -3.9 | -3.6 | -5.9 | -6.9 | -4.1 | -5.4 | -6.1 | -6.2 | -5.3 | -6.2 | -6.3 | -6.3 |     |
| Water-Peptide.1.z.+30 | -6.3 <sup>a</sup> | 9.6  | -4.3 | -1.4 | -5.6 | -6.3 | -3.7 | -4.8 | -5.8 | -5.7 | -4.4 | -5.6 | -5.6 | -5.6 |     |
| Water-Peptide.2.y.-30 | -7.8 <sup>a</sup> | 10.0 | -3.3 | -3.8 | -6.1 | -7.4 | -3.4 | -5.9 | -6.8 | -6.8 | -5.5 | -6.5 | -6.6 | -6.6 |     |
| Water-Peptide.2.y.+30 | -7.7 <sup>a</sup> | 10.5 | -3.4 | -3.7 | -6.1 | -7.4 | -3.3 | -5.9 | -6.8 | -6.8 | -5.4 | -6.5 | -6.6 | -6.6 |     |
| Water-Peptide.2.z.-30 | -1.8 <sup>a</sup> | 2.9  | -1.6 | -1.7 | -1.6 | -2.5 | -0.8 | -1.5 | -2.1 | -2.1 | -1.2 | -2.0 | -1.9 | -2.0 |     |
| Water-Peptide.2.z.+30 | -6.7 <sup>a</sup> | 5.6  | -2.6 | -2.9 | -4.9 | -5.9 | -3.1 | -5.0 | -5.4 | -5.5 | -4.7 | -5.2 | -5.5 | -5.5 |     |
| Peptide-Water.1.y.-30 | -4.5 <sup>a</sup> | 3.2  | -3.2 | -1.1 | -3.5 | -5.4 | -3.1 | -3.2 | -3.7 | -3.9 | -3.3 | -4.0 | -4.1 | -4.1 |     |
| Peptide-Water.1.y.+30 | -4.5 <sup>a</sup> | 3.2  | -3.2 | -1.1 | -3.5 | -5.4 | -3.1 | -3.2 | -3.8 | -3.9 | -3.3 | -4.0 | -4.1 | -4.1 |     |
| Peptide-Water.1.z.-30 | -3.9 <sup>a</sup> | 3.0  | -3.1 | -1.5 | -3.5 | -5.2 | -2.9 | -3.1 | -3.6 | -3.7 | -3.2 | -3.9 | -4.0 | -3.9 |     |
| Peptide-Water.1.z.+30 | -4.5 <sup>a</sup> | 3.5  | -3.0 | -0.9 | -3.3 | -5.1 | -2.9 | -3.1 | -3.6 | -3.7 | -3.1 | -3.8 | -3.9 | -3.9 |     |
| Peptide-Water.2.y.-30 | -4.4 <sup>a</sup> | 5.1  | -3.0 | -0.8 | -3.2 | -5.3 | -2.5 | -3.1 | -3.7 | -3.8 | -3.0 | -3.7 | -3.9 | -3.8 |     |
| Peptide-Water.2.y.+30 | -4.4 <sup>a</sup> | 5.0  | -3.0 | -0.8 | -3.2 | -5.2 | -2.5 | -3.2 | -3.8 | -3.9 | -3.0 | -3.7 | -3.9 | -3.9 |     |
| Peptide-Water.2.z.-30 | -5.0 <sup>a</sup> | 4.8  | -3.4 | -1.3 | -3.8 | -6.3 | -3.1 | -3.5 | -4.1 | -4.2 | -3.5 | -4.2 | -4.3 | -4.3 |     |
| Peptide-Water.2.z.+30 | -5.0 <sup>a</sup> | 4.7  | -3.2 | -1.3 | -3.7 | -6.1 | -3.0 | -3.5 | -4.0 | -4.1 | -3.5 | -4.1 | -4.3 | -4.3 |     |

... continued on next page ...

Table S29: ... continued from previous page ...

| Complex                 | Ref.              | MNDO | AMI  | PM3  | PM6  | PM7  | OM1  |      | OM2  |      | OM3  |      | D3T  |
|-------------------------|-------------------|------|------|------|------|------|------|------|------|------|------|------|------|
|                         |                   |      |      |      |      |      | OM1  | OM2  | D2   | D3   | OM3  | D3   |      |
| MeOH-Peptide_1.y-30     | -7.3 <sup>a</sup> | 9.4  | -3.5 | -2.1 | -4.9 | -6.0 | -3.7 | -4.3 | -5.8 | -4.0 | -5.8 | -5.8 | -5.8 |
| MeOH-Peptide_1.y-+30    | -7.0 <sup>a</sup> | 8.7  | -2.4 | -2.8 | -4.1 | -5.5 | -2.5 | -3.8 | -4.7 | -4.8 | -4.8 | -4.8 | -4.8 |
| MeOH-Peptide_1.z-30     | -6.7 <sup>a</sup> | 10.4 | -3.5 | -1.1 | -5.1 | -5.8 | -3.1 | -4.2 | -5.4 | -5.5 | -5.5 | -5.4 | -5.4 |
| MeOH-Peptide_1.z-+30    | -7.0 <sup>a</sup> | 7.9  | -2.5 | -2.7 | -4.0 | -5.6 | -2.8 | -3.8 | -4.8 | -4.9 | -4.9 | -5.1 | -5.1 |
| MeOH-Peptide_2.y-30     | -6.9 <sup>a</sup> | 13.6 | -2.9 | -1.8 | -4.3 | -6.0 | -2.3 | -3.9 | -5.3 | -3.0 | -4.8 | -4.9 | -4.9 |
| MeOH-Peptide_2.y-+30    | -7.4 <sup>a</sup> | 8.3  | -1.9 | -3.5 | -4.4 | -6.1 | -2.8 | -4.6 | -5.4 | -5.6 | -5.3 | -5.6 | -5.6 |
| MeOH-Peptide_2.z-30     | -6.9 <sup>a</sup> | 6.5  | -2.0 | -3.0 | -4.0 | -5.5 | -3.0 | -4.3 | -4.9 | -5.1 | -4.9 | -5.1 | -5.1 |
| MeOH-Peptide_2.z-+30    | -1.2 <sup>a</sup> | 2.5  | -0.8 | -1.3 | -0.9 | -2.2 | -0.0 | -1.0 | -1.5 | -1.7 | -1.4 | -1.5 | -1.5 |
| MeNH2-Peptide_1.y-30    | -4.5 <sup>a</sup> | 7.4  | -1.7 | -0.2 | -3.0 | -5.1 | -1.7 | -2.0 | -3.7 | -3.8 | -3.7 | -3.9 | -3.9 |
| MeNH2-Peptide_1.y-+30   | -4.5 <sup>a</sup> | 5.9  | -1.1 | -0.1 | -3.4 | -5.3 | -1.9 | -2.6 | -3.8 | -2.3 | -3.8 | -3.9 | -3.9 |
| MeNH2-Peptide_1.z-30    | -4.4 <sup>a</sup> | 7.3  | -0.9 | -0.0 | -2.9 | -4.4 | -1.3 | -2.1 | -3.8 | -1.6 | -3.7 | -3.8 | -3.8 |
| MeNH2-Peptide_1.z-+30   | -4.6 <sup>a</sup> | 6.2  | -2.7 | -0.4 | -3.7 | -7.0 | -1.8 | -2.7 | -3.8 | -2.1 | -3.5 | -3.7 | -3.7 |
| MeNH2-Peptide_2.y-30    | -4.5 <sup>a</sup> | 6.8  | -1.8 | 0.2  | -2.7 | -4.3 | -1.3 | -1.9 | -3.3 | -3.6 | -3.5 | -3.4 | -3.4 |
| MeNH2-Peptide_2.y-+30   | -2.0 <sup>a</sup> | 3.9  | -0.7 | -0.8 | -1.6 | -3.2 | -0.4 | -1.2 | -2.1 | -2.2 | -2.0 | -2.0 | -2.0 |
| MeNH2-Peptide_2.z-30    | -4.2 <sup>a</sup> | 4.5  | -2.1 | 0.1  | -2.8 | -5.1 | -1.8 | -2.1 | -3.0 | -1.8 | -2.8 | -3.1 | -3.1 |
| MeNH2-Peptide_2.z-+30   | -3.0 <sup>a</sup> | 5.5  | -0.3 | 0.1  | -2.2 | -3.5 | -0.7 | -1.5 | -2.8 | -1.1 | -2.8 | -3.0 | -3.0 |
| Peptide-MeOH_1.y-30     | -5.5 <sup>a</sup> | 6.1  | -2.6 | -0.1 | -3.8 | -5.5 | -2.6 | -3.3 | -4.5 | -4.7 | -4.5 | -4.7 | -4.7 |
| Peptide-MeOH_1.y-+30    | -5.4 <sup>a</sup> | 5.9  | -3.3 | -1.0 | -4.1 | -6.4 | -2.8 | -3.4 | -4.5 | -3.2 | -4.4 | -4.6 | -4.6 |
| Peptide-MeOH_1.z-30     | -4.7 <sup>a</sup> | 6.4  | -2.6 | -0.8 | -3.8 | -5.6 | -2.3 | -2.9 | -4.2 | -2.6 | -4.2 | -4.3 | -4.3 |
| Peptide-MeOH_1.z-+30    | -5.6 <sup>a</sup> | 5.8  | -2.8 | -0.7 | -3.8 | -5.8 | -2.6 | -3.5 | -4.3 | -4.5 | -4.2 | -4.5 | -4.5 |
| Peptide-MeOH_2.y-30     | -4.1 <sup>a</sup> | 8.4  | -1.9 | -0.1 | -3.0 | -5.4 | -1.1 | -2.4 | -3.8 | -1.8 | -3.6 | -3.6 | -3.6 |
| Peptide-MeOH_2.y-+30    | -5.5 <sup>a</sup> | 5.9  | -2.8 | -0.8 | -3.7 | -6.2 | -2.5 | -3.4 | -4.3 | -3.1 | -4.1 | -4.3 | -4.3 |
| Peptide-MeOH_2.z-30     | -5.8 <sup>a</sup> | 6.1  | -3.0 | -1.0 | -4.1 | -6.6 | -2.8 | -3.8 | -4.7 | -3.4 | -4.5 | -4.7 | -4.7 |
| Peptide-MeOH_2.z-+30    | -5.3 <sup>a</sup> | 9.4  | -2.7 | -0.1 | -3.6 | -6.4 | -1.8 | -3.0 | -4.5 | -2.3 | -4.2 | -4.3 | -4.3 |
| Peptide-MeNH2_1.y-30    | -6.5 <sup>a</sup> | 5.4  | -1.2 | -0.6 | -4.1 | -8.0 | -3.2 | -3.5 | -4.9 | -5.2 | -5.2 | -5.6 | -5.5 |
| Peptide-MeNH2_1.y-+30   | -6.4 <sup>a</sup> | 5.0  | -1.7 | -1.4 | -4.4 | -8.9 | -3.1 | -3.8 | -5.0 | -3.6 | -5.1 | -5.4 | -5.4 |
| Peptide-MeNH2_1.z-30    | -5.6 <sup>a</sup> | 6.9  | -1.4 | -1.0 | -3.8 | -7.5 | -2.1 | -2.9 | -4.5 | -2.4 | -4.5 | -4.5 | -4.4 |
| Peptide-MeNH2_1.z-+30   | -6.5 <sup>a</sup> | 4.7  | -1.5 | -1.1 | -4.0 | -8.3 | -3.2 | -3.6 | -4.7 | -5.0 | -5.0 | -5.3 | -5.3 |
| Peptide-MeNH2_2.y-30    | -4.6 <sup>a</sup> | 8.1  | -1.0 | -0.2 | -3.2 | -7.3 | -1.3 | -2.4 | -4.0 | -1.7 | -3.7 | -3.8 | -3.8 |
| Peptide-MeNH2_2.y-+30   | -6.3 <sup>a</sup> | 5.3  | -1.0 | -1.0 | -3.3 | -8.1 | -2.6 | -3.3 | -4.4 | -3.4 | -4.7 | -5.0 | -5.0 |
| Peptide-MeNH2_2.z-30    | -6.2 <sup>a</sup> | 5.8  | -0.8 | -0.6 | -3.4 | -8.3 | -2.6 | -3.4 | -4.5 | -3.4 | -4.8 | -5.1 | -5.1 |
| Peptide-MeNH2_2.z-+30   | -5.7 <sup>a</sup> | 9.6  | -0.9 | -0.1 | -3.1 | -7.8 | -1.2 | -2.6 | -4.3 | -2.0 | -4.2 | -4.3 | -4.2 |
| Peptide-Peptide_1.y-30  | -7.6 <sup>a</sup> | 8.6  | -2.9 | -1.1 | -5.3 | -8.2 | -3.4 | -4.5 | -6.4 | -3.8 | -6.2 | -6.5 | -6.5 |
| Peptide-Peptide_1.y-+30 | -7.5 <sup>a</sup> | 7.2  | -3.7 | -2.2 | -5.2 | -8.5 | -3.2 | -4.3 | -5.7 | -3.7 | -5.4 | -5.8 | -5.8 |
| Peptide-Peptide_1.z-30  | -6.4 <sup>a</sup> | 7.9  | -3.1 | -1.9 | -4.8 | -7.6 | -2.6 | -3.9 | -5.7 | -3.1 | -5.5 | -5.6 | -5.6 |
| Peptide-Peptide_1.z-+30 | -7.6 <sup>a</sup> | 6.8  | -3.1 | -1.9 | -5.0 | -8.1 | -3.2 | -4.3 | -5.6 | -5.9 | -5.3 | -5.8 | -5.7 |
| Peptide-Peptide_2.y-30  | -3.0 <sup>a</sup> | 6.2  | -0.2 | -1.1 | -1.8 | -4.6 | -0.0 | -1.4 | -2.8 | -0.8 | -2.6 | -2.8 | -2.8 |
| Peptide-Peptide_2.y-+30 | -7.9 <sup>a</sup> | 5.8  | -3.5 | -2.5 | -5.5 | -8.8 | -3.7 | -5.2 | -6.2 | -6.6 | -6.6 | -6.3 | -6.3 |
| Peptide-Peptide_2.z-30  | -8.0 <sup>a</sup> | 7.0  | -3.3 | -2.5 | -5.6 | -9.0 | -3.5 | -5.3 | -6.4 | -4.6 | -6.0 | -6.4 | -6.4 |
| Peptide-Peptide_2.z-+30 | -7.2 <sup>a</sup> | 12.8 | -3.2 | -0.9 | -4.7 | -8.3 | -2.0 | -3.7 | -6.0 | -2.5 | -5.4 | -5.5 | -5.5 |
| Water-Pyridine_1.y-30   | -5.8 <sup>a</sup> | 4.7  | 0.4  | -0.5 | -2.8 | -5.1 | -1.8 | -2.6 | -3.2 | -3.0 | -3.7 | -3.9 | -3.9 |
| Water-Pyridine_1.y-+30  | -5.9 <sup>a</sup> | 3.4  | -0.8 | -1.2 | -4.1 | -6.5 | -3.4 | -3.8 | -4.4 | -4.5 | -4.9 | -5.1 | -5.1 |
| Water-Pyridine_1.z-30   | -5.8 <sup>a</sup> | 3.8  | -0.3 | -0.9 | -3.5 | -5.8 | -2.6 | -3.2 | -3.8 | -3.9 | -4.2 | -4.5 | -4.5 |
| Water-Pyridine_1.z-+30  | -5.8 <sup>a</sup> | 3.8  | -0.3 | -0.9 | -3.5 | -5.8 | -2.7 | -3.2 | -3.8 | -3.9 | -4.3 | -4.5 | -4.5 |
| Water-Pyridine_2.y-30   | -6.0 <sup>a</sup> | 5.8  | 0.4  | -1.2 | -3.1 | -6.0 | -2.0 | -3.3 | -4.0 | -3.8 | -4.6 | -4.8 | -4.8 |

... continued on next page ...

Table S29: ... continued from previous page ...

| Complex                  | Ref.               | MNDO | AMI  | PM3  | PM6   | PM7   | OM1  | OM2   |       | OM3   |       | D3T   |
|--------------------------|--------------------|------|------|------|-------|-------|------|-------|-------|-------|-------|-------|
|                          |                    |      |      |      |       |       |      | D2    | D3    | D2    | D3    |       |
| Water-Pyridine.2.y.+30   | -6.2 <sup>a</sup>  | 6.4  | 0.9  | -0.8 | -2.5  | -5.5  | -1.2 | -3.1  | -3.7  | -3.8  | -3.8  | -4.5  |
| Water-Pyridine.2.z.-30   | -5.3 <sup>a</sup>  | 7.9  | 0.5  | -0.3 | -2.2  | -5.1  | -0.8 | -2.5  | -3.2  | -3.3  | -3.3  | -3.5  |
| Water-Pyridine.2.z.+30   | -5.3 <sup>a</sup>  | 7.9  | 0.5  | -0.3 | -2.2  | -5.1  | -0.8 | -2.5  | -3.2  | -3.3  | -3.3  | -3.5  |
| MeOH-Pyridine.1.y.-30    | -6.5 <sup>a</sup>  | 4.9  | 0.2  | -0.8 | -2.7  | -5.5  | -2.5 | -2.8  | -3.7  | -3.9  | -3.9  | -4.6  |
| MeOH-Pyridine.1.y.+30    | -6.5 <sup>a</sup>  | 4.9  | 0.2  | -0.8 | -2.7  | -5.5  | -2.5 | -2.8  | -3.7  | -3.9  | -3.9  | -4.6  |
| MeOH-Pyridine.1.z.-30    | -6.5 <sup>a</sup>  | 5.4  | 0.0  | -0.2 | -2.8  | -5.5  | -2.8 | -2.8  | -3.9  | -4.2  | -4.1  | -4.9  |
| MeOH-Pyridine.1.z.+30    | -6.4 <sup>a</sup>  | 5.5  | 0.6  | -1.0 | -2.3  | -5.1  | -1.9 | -2.6  | -3.3  | -3.5  | -3.5  | -4.3  |
| MeOH-Pyridine.2.y.-30    | -6.0 <sup>a</sup>  | 9.6  | 1.3  | -0.1 | -1.2  | -4.6  | -0.5 | -1.9  | -3.0  | -3.1  | -3.1  | -3.5  |
| MeOH-Pyridine.2.y.+30    | -6.0 <sup>a</sup>  | 9.7  | 1.3  | -0.0 | -1.2  | -4.6  | -0.5 | -1.9  | -3.0  | -3.1  | -3.1  | -3.5  |
| MeOH-Pyridine.2.z.-30    | -6.7 <sup>a</sup>  | 6.7  | 0.9  | -1.2 | -2.1  | -5.4  | -1.8 | -2.8  | -3.7  | -3.9  | -3.9  | -4.8  |
| MeOH-Pyridine.2.z.+30    | -6.7 <sup>a</sup>  | 7.8  | 1.5  | -0.9 | -1.6  | -5.1  | -1.0 | -2.6  | -3.6  | -3.8  | -3.8  | -4.7  |
| AcOH-AcOH.1.y.-30        | -16.2 <sup>a</sup> | 18.7 | -3.5 | -9.8 | -10.2 | -14.4 | -5.9 | -11.1 | -12.4 | -12.5 | -12.5 | -11.1 |
| AcOH-AcOH.1.y.+30        | -16.2 <sup>a</sup> | 18.7 | -3.5 | -9.8 | -10.2 | -14.4 | -5.9 | -11.1 | -12.4 | -12.5 | -12.5 | -11.1 |
| AcOH-AcOH.1.z.-30        | -11.1 <sup>a</sup> | 10.4 | -0.7 | -5.9 | -6.6  | -11.2 | -4.4 | -7.7  | -8.5  | -8.7  | -8.7  | -7.9  |
| AcOH-AcOH.1.z.+30        | -9.8 <sup>a</sup>  | 10.2 | -2.2 | -5.5 | -5.6  | -9.6  | -2.7 | -5.5  | -6.3  | -6.4  | -6.5  | -5.7  |
| AcOH-AcOH.2.y.-30        | -16.0 <sup>a</sup> | 20.0 | -2.6 | -9.7 | -10.1 | -14.8 | -5.6 | -11.3 | -12.6 | -12.7 | -12.7 | -11.2 |
| AcOH-AcOH.2.y.+30        | -16.0 <sup>a</sup> | 20.0 | -2.6 | -9.7 | -10.1 | -14.8 | -5.6 | -11.3 | -12.6 | -12.7 | -12.7 | -11.2 |
| AcOH-AcOH.2.z.-30        | -10.5 <sup>a</sup> | 9.4  | -0.8 | -5.7 | -6.5  | -11.0 | -4.9 | -8.0  | -8.8  | -9.0  | -9.0  | -8.2  |
| AcOH-AcOH.2.z.+30        | -7.1 <sup>a</sup>  | 11.8 | -2.1 | -3.5 | -3.8  | -7.6  | -0.4 | -3.3  | -4.3  | -4.3  | -4.4  | -3.4  |
| AcNH2-AcNH2.1.y.-30      | -14.1 <sup>a</sup> | 11.4 | -7.6 | -5.6 | -11.2 | -15.2 | -7.4 | -10.8 | -12.1 | -12.2 | -12.2 | -11.8 |
| AcNH2-AcNH2.1.y.+30      | -14.1 <sup>a</sup> | 11.4 | -7.6 | -5.6 | -11.3 | -15.2 | -7.4 | -10.8 | -12.1 | -12.2 | -12.2 | -11.8 |
| AcNH2-AcNH2.1.z.-30      | -10.1 <sup>a</sup> | 6.6  | -3.7 | -5.0 | -7.5  | -10.9 | -5.2 | -7.9  | -8.7  | -8.9  | -8.9  | -8.6  |
| AcNH2-AcNH2.1.z.+30      | -9.3 <sup>a</sup>  | 6.0  | -5.1 | -4.3 | -7.4  | -10.8 | -5.1 | -7.0  | -7.9  | -8.1  | -8.1  | -7.9  |
| AcNH2-AcNH2.2.y.-30      | -13.9 <sup>a</sup> | 12.2 | -7.3 | -5.8 | -11.2 | -15.1 | -7.3 | -10.9 | -12.2 | -12.3 | -12.4 | -11.9 |
| AcNH2-AcNH2.2.y.+30      | -13.9 <sup>a</sup> | 12.2 | -7.3 | -5.8 | -11.2 | -15.1 | -7.3 | -10.9 | -12.2 | -12.4 | -12.4 | -11.9 |
| AcNH2-AcNH2.2.z.-30      | -9.6 <sup>a</sup>  | 6.6  | -3.0 | -4.4 | -7.0  | -10.1 | -4.8 | -7.6  | -8.3  | -8.5  | -8.6  | -8.2  |
| AcNH2-AcNH2.2.z.+30      | -7.8 <sup>a</sup>  | 7.1  | -5.0 | -3.2 | -6.6  | -9.8  | -4.2 | -6.0  | -7.0  | -7.1  | -7.2  | -6.9  |
| AcOH-Uracil.1.y.-30      | -16.7 <sup>a</sup> | 14.9 | -6.3 | -9.1 | -11.3 | -15.2 | -8.0 | -12.7 | -14.1 | -14.3 | -14.3 | -13.2 |
| AcOH-Uracil.1.y.+30      | -16.7 <sup>a</sup> | 14.9 | -6.3 | -9.1 | -11.3 | -15.2 | -8.0 | -12.7 | -14.0 | -14.2 | -14.2 | -13.1 |
| AcOH-Uracil.1.z.-30      | -11.9 <sup>a</sup> | 7.0  | -3.7 | -6.5 | -8.5  | -12.4 | -6.4 | -9.6  | -10.5 | -10.8 | -10.8 | -9.9  |
| AcOH-Uracil.1.z.+30      | -10.3 <sup>a</sup> | 9.3  | -2.7 | -5.4 | -5.7  | -9.3  | -3.9 | -6.4  | -7.3  | -7.5  | -7.5  | -7.2  |
| AcOH-Uracil.2.y.-30      | -17.2 <sup>a</sup> | 17.2 | -4.5 | -9.3 | -11.3 | -16.7 | -8.0 | -13.4 | -14.9 | -15.0 | -15.0 | -14.1 |
| AcOH-Uracil.2.y.+30      | -17.2 <sup>a</sup> | 17.2 | -4.5 | -9.2 | -11.2 | -16.7 | -8.0 | -13.4 | -14.9 | -15.0 | -15.0 | -14.1 |
| AcOH-Uracil.2.z.-30      | -11.4 <sup>a</sup> | 9.4  | -0.3 | -5.6 | -6.2  | -10.7 | -5.5 | -9.0  | -9.8  | -10.0 | -10.0 | -9.7  |
| AcOH-Uracil.2.z.+30      | -9.7 <sup>a</sup>  | 9.6  | -4.5 | -4.7 | -6.8  | -11.1 | -4.1 | -7.2  | -8.3  | -8.5  | -8.5  | -7.4  |
| AcNH2-Uracil.1.y.-30     | -17.3 <sup>a</sup> | 12.3 | -7.8 | -8.5 | -13.3 | -17.8 | -9.7 | -14.3 | -15.7 | -15.9 | -16.0 | -15.4 |
| AcNH2-Uracil.1.y.+30     | -17.2 <sup>a</sup> | 12.5 | -8.1 | -8.5 | -13.2 | -17.7 | -9.6 | -14.1 | -15.6 | -15.8 | -15.8 | -15.2 |
| AcNH2-Uracil.1.z.-30     | -13.8 <sup>a</sup> | 6.5  | -4.4 | -7.7 | -10.4 | -14.0 | -8.0 | -11.6 | -12.5 | -12.8 | -12.9 | -12.5 |
| AcNH2-Uracil.1.z.+30     | -10.1 <sup>a</sup> | 6.8  | -5.0 | -4.7 | -7.3  | -11.3 | -5.6 | -7.8  | -8.8  | -9.0  | -9.0  | -8.7  |
| AcNH2-Uracil.2.y.-30     | -16.3 <sup>a</sup> | 12.2 | -8.4 | -7.8 | -12.9 | -17.4 | -9.4 | -13.6 | -15.1 | -15.2 | -15.3 | -14.7 |
| AcNH2-Uracil.2.y.+30     | -16.3 <sup>a</sup> | 12.3 | -8.3 | -7.8 | -12.8 | -17.3 | -9.3 | -13.6 | -15.1 | -15.3 | -15.3 | -14.7 |
| AcNH2-Uracil.2.z.-30     | -10.2 <sup>a</sup> | 6.4  | -3.4 | -4.8 | -7.2  | -10.7 | -5.6 | -8.6  | -9.4  | -9.6  | -9.7  | -9.3  |
| AcNH2-Uracil.2.z.+30     | -11.2 <sup>a</sup> | 7.9  | -6.5 | -5.0 | -9.0  | -12.4 | -6.4 | -9.2  | -10.5 | -10.7 | -10.7 | -10.2 |
| Uracil-Uracil_BP.1.y.-30 | -15.3 <sup>a</sup> | 14.0 | -6.0 | -6.2 | -10.7 | -15.2 | -7.7 | -12.0 | -13.6 | -13.8 | -13.9 | -13.4 |
| Uracil-Uracil_BP.1.y.+30 | -15.3 <sup>a</sup> | 14.0 | -6.0 | -6.2 | -10.7 | -15.2 | -7.7 | -12.0 | -13.6 | -13.8 | -13.9 | -13.4 |

... continued on next page ...

Table S29: ... continued from previous page ...

| Complex                       | Ref.               | MNDO | AMI  | PM3  | PM6   | PM7   | OM1  |       | OM2   |       | OM3   |       | OM3   |       | D3T   |
|-------------------------------|--------------------|------|------|------|-------|-------|------|-------|-------|-------|-------|-------|-------|-------|-------|
|                               |                    |      |      |      |       |       | OM1  | OM2   | D2    | D3    | D3T   | D2    | D3    | D3T   |       |
| Uracil-Uracil_BP_1.z.-30      | -8.2 <sup>a</sup>  | 8.7  | -2.5 | -2.2 | -4.7  | -8.5  | -3.1 | -5.1  | -6.2  | -6.5  | -4.6  | -6.3  | -6.3  | -6.3  | -6.3  |
| Uracil-Uracil_BP_1.z.+30      | -11.5 <sup>a</sup> | 7.0  | -3.2 | -5.6 | -7.9  | -11.7 | -6.4 | -9.5  | -10.4 | -10.8 | -9.0  | -10.1 | -10.5 | -10.6 | -10.6 |
| Uracil-Uracil_BP_2.y.-30      | -14.9 <sup>a</sup> | 14.4 | -5.8 | -6.2 | -10.6 | -15.2 | -7.5 | -11.9 | -13.4 | -13.7 | -10.8 | -12.6 | -13.2 | -13.2 | -13.2 |
| Uracil-Uracil_BP_2.y.+30      | -14.9 <sup>a</sup> | 14.4 | -5.9 | -6.2 | -10.6 | -15.2 | -7.5 | -11.9 | -13.4 | -13.7 | -10.8 | -12.6 | -13.1 | -13.2 | -13.2 |
| Uracil-Uracil_BP_2.z.-30      | -9.6 <sup>a</sup>  | 8.6  | -4.6 | -3.8 | -7.0  | -10.7 | -5.0 | -7.5  | -8.7  | -9.0  | -6.8  | -8.4  | -8.7  | -8.8  | -8.8  |
| Uracil-Uracil_BP_2.z.+30      | -9.6 <sup>a</sup>  | 8.1  | -1.6 | -3.8 | -5.8  | -9.4  | -4.5 | -7.7  | -8.6  | -8.9  | -6.9  | -8.0  | -8.4  | -8.5  | -8.5  |
| Benzene-Ethene_1.y.-30        | -0.7 <sup>a</sup>  | 1.2  | 0.7  | 0.2  | 0.1   | -1.9  | 0.3  | 0.7   | -0.1  | -0.5  | 0.5   | -0.4  | -0.8  | -0.8  | -0.8  |
| Benzene-Ethene_1.y.+30        | -0.7 <sup>a</sup>  | 1.2  | 0.7  | 0.2  | 0.1   | -1.9  | 0.3  | 0.7   | -0.1  | -0.5  | 0.5   | -0.4  | -0.8  | -0.8  | -0.8  |
| Benzene-Ethene_1.z.-30        | -0.7 <sup>a</sup>  | 1.2  | 0.6  | 0.3  | 0.1   | -1.8  | 0.3  | 0.7   | -0.1  | -0.5  | 0.5   | -0.4  | -0.8  | -0.8  | -0.8  |
| Benzene-Ethene_1.z.+30        | -0.7 <sup>a</sup>  | 1.2  | 0.6  | 0.3  | 0.1   | -1.8  | 0.3  | 0.7   | -0.1  | -0.5  | 0.5   | -0.4  | -0.8  | -0.8  | -0.8  |
| Benzene-Ethene_2.y.-30        | -1.5 <sup>a</sup>  | 3.1  | 1.3  | 0.6  | -0.0  | -2.2  | 0.4  | 0.7   | -0.7  | -1.2  | 0.6   | -1.1  | -1.6  | -1.6  | -1.6  |
| Benzene-Ethene_2.y.+30        | -1.5 <sup>a</sup>  | 3.1  | 1.3  | 0.6  | -0.0  | -2.2  | 0.4  | 0.7   | -0.7  | -1.2  | 0.6   | -1.1  | -1.6  | -1.6  | -1.6  |
| Benzene-Ethene_2.z.-30        | -1.3 <sup>a</sup>  | 2.4  | 1.1  | 0.5  | -0.0  | -2.1  | 0.3  | 0.6   | -0.5  | -1.0  | 0.5   | -0.8  | -1.3  | -1.3  | -1.3  |
| Benzene-Ethene_2.z.+30        | -1.3 <sup>a</sup>  | 2.4  | 1.1  | 0.5  | -0.0  | -2.1  | 0.3  | 0.6   | -0.5  | -1.0  | 0.5   | -0.8  | -1.3  | -1.3  | -1.3  |
| Pyridine-Ethene_1.y.-30       | -1.0 <sup>a</sup>  | 1.5  | 0.6  | 0.2  | -0.1  | -2.0  | 0.1  | 0.4   | -0.4  | -0.8  | 0.3   | -0.7  | -1.1  | -1.1  | -1.1  |
| Pyridine-Ethene_1.y.+30       | -1.0 <sup>a</sup>  | 1.5  | 0.6  | 0.2  | -0.1  | -2.0  | 0.1  | 0.4   | -0.4  | -0.8  | 0.3   | -0.7  | -1.1  | -1.1  | -1.1  |
| Pyridine-Ethene_1.z.-30       | -1.0 <sup>a</sup>  | 1.3  | 0.7  | 0.3  | -0.1  | -2.2  | 0.1  | 0.5   | -0.4  | -0.9  | 0.3   | -0.7  | -1.2  | -1.2  | -1.2  |
| Pyridine-Ethene_1.z.+30       | -1.1 <sup>a</sup>  | 1.8  | 0.7  | 0.5  | -0.2  | -2.0  | 0.0  | 0.4   | -0.5  | -0.9  | 0.2   | -0.9  | -1.3  | -1.2  | -1.2  |
| Pyridine-Ethene_2.y.-30       | -1.6 <sup>a</sup>  | 2.9  | 1.0  | 0.7  | -0.3  | -2.2  | 0.1  | 0.3   | -0.9  | -1.3  | 0.2   | -1.2  | -1.7  | -1.6  | -1.6  |
| Pyridine-Ethene_2.y.+30       | -1.6 <sup>a</sup>  | 2.9  | 1.0  | 0.7  | -0.3  | -2.2  | 0.1  | 0.3   | -0.9  | -1.3  | 0.2   | -1.2  | -1.7  | -1.6  | -1.6  |
| Pyridine-Ethene_2.z.-30       | -1.8 <sup>a</sup>  | 3.4  | 1.0  | 0.5  | -0.4  | -2.4  | 0.1  | 0.2   | -1.1  | -1.6  | 0.2   | -1.4  | -1.9  | -1.9  | -1.9  |
| Pyridine-Ethene_2.z.+30       | -1.6 <sup>a</sup>  | 3.6  | 1.6  | 1.1  | -0.1  | -2.2  | 0.2  | 0.6   | -0.8  | -1.3  | 0.5   | -1.3  | -1.9  | -1.8  | -1.8  |
| Uracil-Ethene_1.y.-30         | -2.4 <sup>a</sup>  | 3.3  | 0.2  | 0.5  | -1.0  | -2.6  | -0.4 | -1.0  | -2.0  | -2.3  | -0.8  | -2.1  | -2.5  | -2.4  | -2.4  |
| Uracil-Ethene_1.y.+30         | -2.3 <sup>a</sup>  | 3.4  | 0.4  | 0.5  | -0.8  | -2.6  | -0.3 | -0.8  | -1.9  | -2.3  | -0.6  | -2.0  | -2.4  | -2.3  | -2.3  |
| Uracil-Ethene_1.z.-30         | -2.7 <sup>a</sup>  | 4.3  | 0.6  | 0.7  | -0.9  | -2.5  | -0.3 | -0.8  | -2.1  | -2.5  | -0.7  | -2.3  | -2.8  | -2.7  | -2.7  |
| Uracil-Ethene_1.z.+30         | -2.1 <sup>a</sup>  | 2.1  | 0.8  | 0.5  | -0.7  | -2.6  | -0.3 | -0.5  | -1.6  | -2.1  | -0.5  | -1.8  | -2.3  | -2.3  | -2.3  |
| Uracil-Ethene_2.y.-30         | -2.4 <sup>a</sup>  | 4.4  | 0.9  | 1.1  | -0.6  | -2.4  | 0.1  | -0.4  | -1.8  | -2.2  | -0.2  | -1.9  | -2.4  | -2.3  | -2.3  |
| Uracil-Ethene_2.y.+30         | -2.4 <sup>a</sup>  | 4.1  | 1.0  | 0.9  | -0.7  | -2.5  | 0.0  | -0.4  | -1.8  | -2.2  | -0.3  | -2.0  | -2.4  | -2.4  | -2.4  |
| Uracil-Ethene_2.z.-30         | -3.0 <sup>a</sup>  | 4.5  | 1.7  | 1.5  | -0.9  | -2.7  | -0.3 | -0.6  | -2.3  | -2.8  | -0.6  | -2.6  | -3.2  | -3.1  | -3.1  |
| Uracil-Ethene_2.z.+30         | -2.9 <sup>a</sup>  | 5.9  | 0.8  | 1.0  | -0.9  | -2.7  | 0.2  | -0.7  | -2.3  | -2.8  | -0.4  | -2.4  | -2.9  | -2.8  | -2.8  |
| Uracil-Ethyne_1.y.-30         | -2.5 <sup>a</sup>  | 2.2  | 0.6  | 0.4  | -0.8  | -2.2  | -0.7 | -1.0  | -2.1  | -2.4  | -1.0  | -2.3  | -2.7  | -2.7  | -2.7  |
| Uracil-Ethyne_1.y.+30         | -3.1 <sup>a</sup>  | 3.0  | 0.6  | 0.5  | -1.0  | -2.3  | -1.0 | -1.6  | -2.8  | -3.1  | -1.4  | -2.9  | -3.3  | -3.3  | -3.3  |
| Uracil-Ethyne_1.z.-30         | -3.0 <sup>a</sup>  | 2.8  | -0.2 | 0.1  | -1.2  | -2.3  | -1.3 | -2.0  | -2.8  | -3.1  | -1.7  | -2.7  | -3.0  | -3.0  | -3.0  |
| Uracil-Ethyne_1.z.+30         | -2.1 <sup>a</sup>  | 2.1  | 0.8  | 0.4  | -0.7  | -2.2  | -0.5 | -0.6  | -1.6  | -2.0  | -0.5  | -1.8  | -2.3  | -2.2  | -2.2  |
| Uracil-Ethyne_2.y.-30         | -3.7 <sup>a</sup>  | 4.6  | 1.2  | 1.2  | -1.1  | -2.4  | -1.0 | -1.7  | -3.3  | -3.7  | -1.5  | -3.4  | -3.9  | -3.9  | -3.9  |
| Uracil-Ethyne_2.y.+30         | -3.7 <sup>a</sup>  | 4.6  | 1.2  | 1.2  | -1.1  | -2.3  | -1.0 | -1.7  | -3.3  | -3.6  | -1.5  | -3.4  | -3.9  | -3.9  | -3.9  |
| Uracil-Ethyne_2.z.-30         | -2.9 <sup>a</sup>  | 4.1  | 1.2  | 0.9  | -0.9  | -2.2  | -0.5 | -1.0  | -2.5  | -2.8  | -0.9  | -2.7  | -3.1  | -3.1  | -3.1  |
| Uracil-Ethyne_2.z.+30         | -2.8 <sup>a</sup>  | 5.1  | 0.3  | 0.8  | -0.6  | -2.0  | -0.2 | -1.1  | -2.4  | -2.7  | -0.7  | -2.2  | -2.6  | -2.5  | -2.5  |
| Benzene-Benzene-pi-pi_1.y.-30 | -1.8 <sup>a</sup>  | 3.7  | 1.8  | 1.0  | 0.1   | -3.9  | 0.6  | 1.1   | -0.8  | -1.6  | 0.9   | -1.3  | -2.1  | -2.0  | -2.0  |
| Benzene-Benzene-pi-pi_1.y.+30 | -2.1 <sup>a</sup>  | 4.0  | 1.7  | 0.9  | -0.1  | -3.7  | 0.5  | 0.6   | -1.3  | -2.0  | 0.6   | -1.7  | -2.4  | -2.3  | -2.3  |
| Benzene-Benzene-pi-pi_1.z.-30 | -2.5 <sup>a</sup>  | 4.4  | 1.7  | 0.8  | -0.3  | -3.7  | 0.4  | 0.4   | -1.6  | -2.3  | 0.5   | -2.0  | -2.7  | -2.6  | -2.6  |
| Benzene-Benzene-pi-pi_1.z.+30 | -1.7 <sup>a</sup>  | 3.1  | 1.6  | 0.8  | 0.2   | -3.9  | 0.6  | 1.2   | -0.5  | -1.3  | 1.0   | -1.1  | -1.9  | -1.8  | -1.8  |
| Benzene-Benzene-pi-pi_2.y.-30 | -2.1 <sup>a</sup>  | 3.9  | 1.5  | 0.8  | -0.2  | -3.6  | 0.4  | 0.4   | -1.4  | -2.1  | 0.5   | -1.7  | -2.5  | -2.4  | -2.4  |
| Benzene-Benzene-pi-pi_2.y.+30 | -1.8 <sup>a</sup>  | 3.8  | 1.8  | 1.0  | 0.1   | -3.9  | 0.6  | 1.1   | -0.8  | -1.6  | 0.9   | -1.3  | -2.1  | -2.0  | -2.0  |
| Benzene-Benzene-pi-pi_2.z.-30 | -2.4 <sup>a</sup>  | 4.1  | 1.5  | 0.7  | -0.4  | -3.5  | 0.3  | 0.1   | -1.8  | -2.5  | 0.3   | -2.0  | -2.7  | -2.6  | -2.6  |

... continued on next page ...

Table S29: ... continued from previous page ...

| Complex                         | Ref.              | MNDO | AMI  | PM3  | PM6  | PM7  | OM1  |      | OM2  |      | OM3  |      | D3T  |
|---------------------------------|-------------------|------|------|------|------|------|------|------|------|------|------|------|------|
|                                 |                   |      |      |      |      |      | OM1  | OM2  | D2   | D3   | D3T  | D2   |      |
| Benzene-Benzene.pi-pi.2.z.+30   | -1.6 <sup>a</sup> | 3.2  | 1.7  | 0.9  | 0.2  | -4.0 | 0.6  | 1.3  | -0.4 | -1.2 | -1.1 | 1.1  | -1.1 |
| Pyridine-Pyridine.pi-pi.1.y.-30 | -2.6 <sup>a</sup> | 4.7  | 1.9  | 1.3  | -0.6 | -4.4 | 0.1  | 0.1  | -2.0 | -2.8 | -2.7 | 0.2  | -2.4 |
| Pyridine-Pyridine.pi-pi.1.y.+30 | -2.9 <sup>a</sup> | 4.6  | 1.1  | 1.0  | -1.0 | -4.7 | -0.3 | -0.5 | -2.4 | -3.1 | -2.9 | -0.3 | -2.6 |
| Pyridine-Pyridine.pi-pi.1.z.-30 | -2.7 <sup>a</sup> | 3.7  | 1.3  | 1.1  | -0.8 | -4.9 | -0.2 | 0.0  | -1.8 | -2.6 | -2.5 | -0.1 | -2.4 |
| Pyridine-Pyridine.pi-pi.1.z.+30 | -3.1 <sup>a</sup> | 5.2  | 1.5  | 1.3  | -0.9 | -4.2 | 0.0  | -0.5 | -2.5 | -3.2 | -3.1 | -0.2 | -2.7 |
| Pyridine-Pyridine.pi-pi.2.y.-30 | -2.5 <sup>a</sup> | 4.5  | 1.8  | 1.2  | -0.5 | -4.4 | 0.1  | 0.2  | -1.9 | -2.7 | -2.5 | 0.2  | -2.3 |
| Pyridine-Pyridine.pi-pi.2.y.+30 | -2.9 <sup>a</sup> | 4.7  | 1.2  | 0.9  | -1.0 | -4.4 | -0.2 | -0.5 | -2.5 | -3.1 | -3.0 | -0.2 | -2.6 |
| Pyridine-Pyridine.pi-pi.2.z.-30 | -2.5 <sup>a</sup> | 3.8  | 1.2  | 1.2  | -0.8 | -4.9 | -0.3 | 0.0  | -1.8 | -2.6 | -2.4 | -0.1 | -2.4 |
| Pyridine-Pyridine.pi-pi.2.z.+30 | -2.8 <sup>a</sup> | 4.7  | 1.4  | 1.0  | -0.8 | -3.9 | 0.0  | -0.5 | -2.4 | -3.1 | -3.0 | -0.2 | -2.6 |
| Benzene-Pyridine.pi-pi.1.y.-30  | -2.4 <sup>a</sup> | 4.3  | 1.8  | 1.1  | -0.4 | -4.0 | 0.3  | 0.4  | -1.6 | -2.3 | -2.2 | 0.4  | -2.0 |
| Benzene-Pyridine.pi-pi.1.y.+30  | -2.4 <sup>a</sup> | 4.1  | 1.5  | 0.9  | -0.5 | -4.2 | 0.1  | 0.3  | -1.6 | -2.3 | -2.2 | 0.3  | -2.0 |
| Benzene-Pyridine.pi-pi.1.z.-30  | -2.0 <sup>a</sup> | 3.1  | 1.4  | 0.7  | -0.2 | -4.3 | 0.3  | 0.8  | -0.9 | -1.7 | -1.6 | 0.6  | -1.5 |
| Benzene-Pyridine.pi-pi.1.z.+30  | -2.8 <sup>a</sup> | 4.7  | 1.5  | 1.1  | -0.7 | -4.0 | 0.1  | -0.2 | -2.1 | -2.8 | -2.7 | 0.0  | -2.4 |
| Benzene-Pyridine.pi-pi.2.y.-30  | -2.3 <sup>a</sup> | 4.2  | 1.8  | 1.1  | -0.3 | -4.3 | 0.2  | 0.5  | -1.5 | -2.3 | -2.2 | 0.5  | -2.0 |
| Benzene-Pyridine.pi-pi.2.y.+30  | -2.6 <sup>a</sup> | 4.2  | 1.2  | 0.7  | -0.8 | -4.1 | 0.0  | -0.2 | -2.0 | -2.7 | -2.6 | 0.0  | -2.2 |
| Benzene-Pyridine.pi-pi.2.z.-30  | -2.1 <sup>a</sup> | 3.6  | 1.4  | 1.2  | -0.3 | -4.4 | 0.1  | 0.7  | -1.2 | -1.9 | -1.8 | 0.4  | -1.8 |
| Benzene-Pyridine.pi-pi.2.z.+30  | -2.9 <sup>a</sup> | 4.8  | 1.6  | 0.8  | -0.7 | -3.9 | 0.1  | -0.3 | -2.4 | -3.0 | -2.9 | -0.0 | -2.5 |
| Benzene-Uracil.pi-pi.1.y.-30    | -4.0 <sup>a</sup> | 7.2  | 1.9  | 2.1  | -1.1 | -4.8 | -0.3 | -0.9 | -3.3 | -3.9 | -3.8 | -0.6 | -3.6 |
| Benzene-Uracil.pi-pi.1.y.+30    | -4.1 <sup>a</sup> | 6.8  | 1.7  | 1.6  | -1.4 | -5.1 | -0.5 | -1.1 | -3.5 | -4.2 | -4.1 | -0.9 | -3.8 |
| Benzene-Uracil.pi-pi.1.z.-30    | -4.2 <sup>a</sup> | 5.9  | 1.2  | 1.0  | -1.6 | -5.3 | -0.6 | -1.3 | -3.6 | -4.3 | -4.2 | -1.0 | -3.9 |
| Benzene-Uracil.pi-pi.1.z.+30    | -3.8 <sup>a</sup> | 7.5  | 2.7  | 2.3  | -0.9 | -4.5 | 0.2  | -0.3 | -3.0 | -3.7 | -3.5 | -0.1 | -3.4 |
| Benzene-Uracil.pi-pi.2.y.-30    | -2.2 <sup>a</sup> | 4.0  | 1.9  | 1.6  | -0.4 | -3.8 | 0.1  | 0.3  | -1.3 | -2.0 | -1.9 | 0.2  | -1.8 |
| Benzene-Uracil.pi-pi.2.y.+30    | -2.4 <sup>a</sup> | 4.4  | 2.0  | 1.7  | -0.4 | -3.9 | 0.1  | 0.3  | -1.4 | -2.1 | -2.0 | 0.3  | -1.9 |
| Benzene-Uracil.pi-pi.2.z.-30    | -3.0 <sup>a</sup> | 4.0  | 1.6  | 0.9  | -0.9 | -5.1 | -0.2 | -0.2 | -2.3 | -3.1 | -3.0 | -0.2 | -2.8 |
| Benzene-Uracil.pi-pi.2.z.+30    | -5.2 <sup>a</sup> | 9.4  | 2.0  | 1.8  | -2.0 | -5.2 | -0.4 | -1.6 | -4.5 | -5.1 | -5.0 | -1.0 | -4.6 |
| Pyridine-Uracil.pi-pi.1.y.-30   | -4.8 <sup>a</sup> | 6.4  | 0.8  | 1.4  | -2.4 | -5.9 | -1.4 | -2.0 | -4.3 | -5.0 | -4.8 | -1.7 | -4.5 |
| Pyridine-Uracil.pi-pi.1.y.+30   | -4.6 <sup>a</sup> | 5.5  | 0.9  | 0.7  | -2.6 | -5.9 | -1.4 | -1.9 | -4.2 | -4.9 | -4.8 | -1.7 | -4.5 |
| Pyridine-Uracil.pi-pi.1.z.-30   | -4.8 <sup>a</sup> | 6.2  | 1.3  | 1.4  | -2.2 | -6.0 | -1.1 | -1.9 | -4.4 | -5.2 | -5.0 | -1.6 | -4.7 |
| Pyridine-Uracil.pi-pi.1.z.+30   | -5.9 <sup>a</sup> | 5.1  | 0.1  | 1.2  | -3.5 | -6.6 | -2.6 | -2.4 | -5.0 | -5.6 | -5.5 | -2.5 | -5.6 |
| Pyridine-Uracil.pi-pi.2.y.-30   | -3.5 <sup>a</sup> | 3.2  | 0.4  | 0.9  | -2.1 | -5.2 | -1.5 | -1.2 | -2.8 | -3.4 | -3.2 | -1.2 | -3.1 |
| Pyridine-Uracil.pi-pi.2.y.+30   | -3.9 <sup>a</sup> | 4.2  | 1.1  | 0.8  | -2.1 | -5.7 | -1.3 | -1.1 | -3.2 | -3.9 | -3.8 | -1.1 | -3.7 |
| Pyridine-Uracil.pi-pi.2.z.-30   | -5.4 <sup>a</sup> | 4.0  | -0.4 | 0.8  | -3.4 | -7.2 | -2.3 | -2.6 | -4.9 | -5.6 | -5.4 | -2.5 | -5.3 |
| Pyridine-Uracil.pi-pi.2.z.+30   | -4.7 <sup>a</sup> | 6.8  | 1.5  | 1.7  | -2.3 | -5.5 | -1.2 | -1.7 | -4.2 | -4.9 | -4.7 | -1.4 | -4.4 |
| Uracil-Uracil.pi-pi.1.y.-30     | -8.3 <sup>a</sup> | 10.3 | -1.8 | 2.7  | -4.2 | -8.3 | -2.5 | -4.0 | -6.9 | -7.6 | -7.4 | -3.6 | -7.1 |
| Uracil-Uracil.pi-pi.1.y.+30     | -7.4 <sup>a</sup> | 8.6  | -0.2 | 2.9  | -3.8 | -8.5 | -2.5 | -3.6 | -6.7 | -7.5 | -7.3 | -3.4 | -7.2 |
| Uracil-Uracil.pi-pi.1.z.-30     | -6.8 <sup>a</sup> | 7.4  | -1.3 | 2.5  | -3.7 | -7.2 | -2.4 | -3.6 | -5.8 | -6.4 | -6.2 | -3.2 | -5.9 |
| Uracil-Uracil.pi-pi.1.z.+30     | -6.7 <sup>a</sup> | 5.1  | -0.3 | 1.0  | -4.3 | -8.5 | -3.1 | -3.6 | -6.3 | -7.1 | -6.9 | -3.9 | -7.1 |
| Uracil-Uracil.pi-pi.2.y.-30     | -6.3 <sup>a</sup> | 7.6  | -0.9 | 2.9  | -3.2 | -7.1 | -2.2 | -3.2 | -5.5 | -6.1 | -5.9 | -2.9 | -5.7 |
| Uracil-Uracil.pi-pi.2.y.+30     | -6.4 <sup>a</sup> | 4.4  | -0.5 | 0.7  | -4.2 | -8.0 | -3.3 | -3.6 | -5.9 | -6.7 | -6.5 | -3.9 | -6.8 |
| Uracil-Uracil.pi-pi.2.z.-30     | -6.8 <sup>a</sup> | 8.2  | 0.7  | 2.7  | -3.5 | -8.0 | -2.0 | -3.2 | -6.3 | -7.1 | -6.9 | -3.0 | -6.8 |
| Uracil-Uracil.pi-pi.2.z.+30     | -7.9 <sup>a</sup> | 12.2 | -1.3 | 3.6  | -3.3 | -7.6 | -1.5 | -3.4 | -6.4 | -7.0 | -6.9 | -2.7 | -6.4 |
| Pentane-Pentane.1.y.-30         | -1.7 <sup>a</sup> | 3.2  | -0.1 | -1.2 | -0.2 | -2.2 | 0.4  | -0.1 | -1.3 | -1.8 | -1.7 | 0.3  | -1.3 |
| Pentane-Pentane.1.y.+30         | -1.7 <sup>a</sup> | 3.2  | -0.1 | -1.2 | -0.2 | -2.2 | 0.4  | -0.1 | -1.4 | -1.8 | -1.7 | 0.3  | -1.3 |
| Pentane-Pentane.1.z.-30         | -2.9 <sup>a</sup> | 6.3  | -0.5 | -2.7 | -0.7 | -3.7 | 0.7  | -0.4 | -2.6 | -3.2 | -3.1 | 0.4  | -2.4 |
| Pentane-Pentane.1.z.+30         | -2.6 <sup>a</sup> | 6.2  | -0.2 | -2.3 | -0.4 | -3.5 | 1.1  | -0.4 | -2.6 | -3.2 | -3.1 | 0.4  | -2.4 |

... continued on next page ...



Table S29: ... continued from previous page ...

| Complex                           | Ref.              | MNDO | AMI  | PM3  | PM6  | PM7  | OM1 |      | OM2  |      | OM3  |      | D3T  |      |
|-----------------------------------|-------------------|------|------|------|------|------|-----|------|------|------|------|------|------|------|
|                                   |                   |      |      |      |      |      | OM1 | OM2  | D2   | D3   | D3T  | D2   |      | D3   |
| Pentane-Pentane.2.y.-30           | -1.6 <sup>a</sup> | 2.8  | -0.1 | -1.2 | -0.2 | -2.1 | 0.4 | -0.1 | -1.3 | -1.8 | -1.7 | 0.2  | -1.3 | -1.7 |
| Pentane-Pentane.2.y.+30           | -1.6 <sup>a</sup> | 2.8  | -0.1 | -1.2 | -0.2 | -2.1 | 0.4 | -0.1 | -1.3 | -1.8 | -1.7 | 0.2  | -1.3 | -1.7 |
| Pentane-Pentane.2.z.-30           | -2.7 <sup>a</sup> | 6.0  | -0.5 | -2.6 | -0.7 | -3.6 | 0.8 | -0.4 | -2.6 | -3.2 | -3.0 | 0.4  | -2.4 | -2.8 |
| Pentane-Pentane.2.z.+30           | -2.7 <sup>a</sup> | 6.2  | -0.3 | -2.4 | -0.4 | -3.5 | 1.0 | -0.4 | -2.6 | -3.2 | -3.1 | 0.5  | -2.4 | -2.8 |
| Neopentane-Pentane.1.y.-30        | -1.2 <sup>a</sup> | 1.9  | -0.2 | -1.0 | -0.2 | -1.9 | 0.3 | -0.2 | -1.1 | -1.5 | -1.4 | 0.1  | -1.1 | -1.4 |
| Neopentane-Pentane.1.y.+30        | -1.2 <sup>a</sup> | 1.9  | -0.2 | -1.0 | -0.2 | -1.9 | 0.3 | -0.2 | -1.1 | -1.5 | -1.4 | 0.1  | -1.1 | -1.4 |
| Neopentane-Pentane.1.z.-30        | -1.8 <sup>a</sup> | 3.0  | -0.5 | -2.0 | -0.4 | -2.6 | 0.4 | -0.4 | -1.7 | -2.2 | -2.2 | 0.0  | -1.6 | -2.0 |
| Neopentane-Pentane.1.z.+30        | -1.6 <sup>a</sup> | 2.6  | -0.4 | -1.8 | -0.4 | -2.4 | 0.4 | -0.4 | -1.6 | -2.1 | -2.0 | -0.0 | -1.5 | -1.9 |
| Neopentane-Pentane.2.y.-30        | -1.9 <sup>a</sup> | 3.5  | -0.1 | -1.4 | -0.4 | -2.5 | 0.5 | -0.2 | -1.6 | -2.1 | -2.0 | 0.2  | -1.6 | -2.0 |
| Neopentane-Pentane.2.y.+30        | -1.9 <sup>a</sup> | 3.5  | -0.1 | -1.4 | -0.4 | -2.5 | 0.5 | -0.2 | -1.6 | -2.1 | -2.0 | 0.2  | -1.6 | -2.0 |
| Neopentane-Pentane.2.z.-30        | -1.8 <sup>a</sup> | 3.3  | -0.3 | -1.5 | -0.3 | -2.6 | 0.5 | -0.2 | -1.6 | -2.1 | -2.0 | 0.2  | -1.5 | -1.9 |
| Neopentane-Pentane.2.z.+30        | -2.0 <sup>a</sup> | 3.8  | -0.1 | -1.6 | -0.3 | -2.6 | 0.6 | -0.3 | -1.8 | -2.4 | -2.3 | 0.2  | -1.8 | -2.2 |
| Neopentane-Neopentane.1.y.-30     | -1.3 <sup>a</sup> | 1.9  | -0.3 | -1.3 | -0.3 | -1.9 | 0.3 | -0.3 | -1.2 | -1.6 | -1.6 | 0.0  | -1.1 | -1.5 |
| Neopentane-Neopentane.1.y.+30     | -1.3 <sup>a</sup> | 1.9  | -0.3 | -1.3 | -0.3 | -1.9 | 0.3 | -0.3 | -1.2 | -1.6 | -1.6 | 0.0  | -1.1 | -1.5 |
| Neopentane-Neopentane.1.z.-30     | -1.2 <sup>a</sup> | 2.0  | -0.3 | -1.3 | -0.3 | -1.9 | 0.3 | -0.3 | -1.2 | -1.6 | -1.5 | 0.0  | -1.1 | -1.4 |
| Neopentane-Neopentane.1.z.+30     | -1.4 <sup>a</sup> | 1.9  | -0.4 | -1.5 | -0.3 | -2.0 | 0.2 | -0.3 | -1.3 | -1.7 | -1.7 | -0.0 | -1.2 | -1.6 |
| Neopentane-Neopentane.2.y.-30     | -1.2 <sup>a</sup> | 1.9  | -0.3 | -1.3 | -0.3 | -1.9 | 0.3 | -0.3 | -1.1 | -1.6 | -1.5 | 0.0  | -1.1 | -1.4 |
| Neopentane-Neopentane.2.y.+30     | -1.2 <sup>a</sup> | 1.9  | -0.3 | -1.3 | -0.3 | -1.9 | 0.3 | -0.3 | -1.1 | -1.6 | -1.5 | 0.0  | -1.1 | -1.4 |
| Neopentane-Neopentane.2.z.-30     | -1.2 <sup>a</sup> | 2.0  | -0.3 | -1.4 | -0.3 | -1.9 | 0.2 | -0.2 | -1.2 | -1.6 | -1.5 | 0.1  | -1.1 | -1.4 |
| Neopentane-Neopentane.2.z.+30     | -1.3 <sup>a</sup> | 1.9  | -0.4 | -1.5 | -0.3 | -2.0 | 0.3 | -0.3 | -1.2 | -1.7 | -1.6 | -0.0 | -1.2 | -1.6 |
| Cyclopentane-Neopentane.1.y.-30   | -1.8 <sup>a</sup> | 3.2  | -0.4 | -1.9 | -0.4 | -2.4 | 0.5 | -0.4 | -1.7 | -2.1 | -2.1 | 0.1  | -1.6 | -1.9 |
| Cyclopentane-Neopentane.1.y.+30   | -1.8 <sup>a</sup> | 3.4  | -0.5 | -2.0 | -0.4 | -2.5 | 0.5 | -0.4 | -1.8 | -2.2 | -2.2 | 0.1  | -1.6 | -2.0 |
| Cyclopentane-Neopentane.1.z.-30   | -1.6 <sup>a</sup> | 2.6  | -0.4 | -1.7 | -0.3 | -2.2 | 0.4 | -0.4 | -1.6 | -2.0 | -1.9 | -0.0 | -1.5 | -1.8 |
| Cyclopentane-Neopentane.1.z.+30   | -1.3 <sup>a</sup> | 2.2  | -0.3 | -1.3 | -0.3 | -2.1 | 0.3 | -0.3 | -1.3 | -1.7 | -1.7 | 0.0  | -1.2 | -1.5 |
| Cyclopentane-Neopentane.2.y.-30   | -1.4 <sup>a</sup> | 2.6  | -0.2 | -1.3 | -0.3 | -2.1 | 0.4 | -0.3 | -1.4 | -1.8 | -1.8 | 0.1  | -1.4 | -1.7 |
| Cyclopentane-Neopentane.2.y.+30   | -1.4 <sup>a</sup> | 2.5  | -0.2 | -1.3 | -0.3 | -2.1 | 0.4 | -0.3 | -1.4 | -1.8 | -1.8 | 0.1  | -1.3 | -1.7 |
| Cyclopentane-Neopentane.2.z.-30   | -1.8 <sup>a</sup> | 3.2  | -0.3 | -1.7 | -0.3 | -2.4 | 0.5 | -0.4 | -1.7 | -2.2 | -2.1 | 0.1  | -1.6 | -2.0 |
| Cyclopentane-Neopentane.2.z.+30   | -1.6 <sup>a</sup> | 2.9  | -0.3 | -1.5 | -0.3 | -2.3 | 0.5 | -0.3 | -1.5 | -1.9 | -1.8 | 0.1  | -1.4 | -1.7 |
| Cyclopentane-Cyclopentane.1.y.-30 | -1.9 <sup>a</sup> | 4.1  | -0.2 | -1.6 | -0.3 | -2.4 | 0.8 | -0.3 | -1.7 | -2.2 | -2.1 | 0.3  | -1.6 | -1.9 |
| Cyclopentane-Cyclopentane.1.y.+30 | -1.8 <sup>a</sup> | 3.8  | -0.2 | -1.5 | -0.3 | -2.5 | 0.7 | -0.2 | -1.7 | -2.1 | -2.0 | 0.3  | -1.5 | -1.8 |
| Cyclopentane-Cyclopentane.1.z.-30 | -1.9 <sup>a</sup> | 4.3  | -0.2 | -1.6 | -0.3 | -2.3 | 0.9 | -0.2 | -1.7 | -2.1 | -2.0 | 0.4  | -1.6 | -1.9 |
| Cyclopentane-Cyclopentane.1.z.+30 | -1.8 <sup>a</sup> | 4.0  | -0.2 | -1.6 | -0.3 | -2.7 | 0.7 | -0.4 | -1.9 | -2.4 | -2.3 | 0.2  | -1.8 | -2.1 |
| Cyclopentane-Cyclopentane.2.y.-30 | -1.8 <sup>a</sup> | 3.7  | -0.2 | -1.7 | -0.3 | -2.4 | 0.7 | -0.3 | -1.8 | -2.2 | -2.1 | 0.2  | -1.6 | -2.0 |
| Cyclopentane-Cyclopentane.2.y.+30 | -1.9 <sup>a</sup> | 3.7  | -0.2 | -1.7 | -0.3 | -2.5 | 0.7 | -0.4 | -1.9 | -2.3 | -2.2 | 0.1  | -1.7 | -2.1 |
| Cyclopentane-Cyclopentane.2.z.-30 | -2.0 <sup>a</sup> | 4.1  | -0.3 | -2.0 | -0.4 | -2.9 | 0.7 | -0.5 | -2.1 | -2.6 | -2.5 | 0.1  | -1.9 | -2.3 |
| Cyclopentane-Cyclopentane.2.z.+30 | -1.9 <sup>a</sup> | 4.0  | -0.3 | -1.8 | -0.3 | -2.4 | 0.7 | -0.4 | -1.9 | -2.3 | -2.2 | 0.2  | -1.7 | -2.0 |
| Ethene-Pentane.1.y.-30            | -1.9 <sup>a</sup> | 3.6  | 0.4  | -0.9 | -0.3 | -2.0 | 0.3 | 0.1  | -1.2 | -1.7 | -1.6 | 0.4  | -1.3 | -1.7 |
| Ethene-Pentane.1.y.+30            | -1.9 <sup>a</sup> | 4.6  | -0.3 | -1.8 | -0.5 | -2.1 | 0.4 | -0.4 | -1.8 | -2.1 | -2.1 | 0.2  | -1.6 | -1.9 |
| Ethene-Pentane.1.z.-30            | -1.4 <sup>a</sup> | 3.1  | -0.1 | -1.1 | -0.3 | -1.8 | 0.4 | -0.2 | -1.3 | -1.6 | -1.6 | 0.2  | -1.2 | -1.5 |
| Ethene-Pentane.1.z.+30            | -1.4 <sup>a</sup> | 3.1  | -0.1 | -1.1 | -0.3 | -1.8 | 0.4 | -0.2 | -1.3 | -1.6 | -1.6 | 0.2  | -1.2 | -1.5 |
| Ethene-Pentane.2.y.-30            | -1.0 <sup>a</sup> | 1.7  | -0.2 | -1.0 | -0.3 | -1.6 | 0.1 | -0.3 | -1.0 | -1.3 | -1.3 | -0.0 | -0.9 | -1.2 |
| Ethene-Pentane.2.y.+30            | -1.2 <sup>a</sup> | 2.5  | -0.4 | -1.5 | -0.2 | -1.7 | 0.3 | -0.2 | -1.1 | -1.4 | -1.4 | 0.2  | -1.0 | -1.3 |
| Ethene-Pentane.2.z.-30            | -0.8 <sup>a</sup> | 1.4  | -0.1 | -0.7 | -0.1 | -1.2 | 0.2 | -0.1 | -0.7 | -1.0 | -1.0 | 0.1  | -0.7 | -0.9 |
| Ethene-Pentane.2.z.+30            | -0.8 <sup>a</sup> | 1.4  | -0.1 | -0.7 | -0.1 | -1.2 | 0.2 | -0.1 | -0.7 | -1.0 | -1.0 | 0.1  | -0.7 | -0.9 |
| Ethylene-Pentane.1.y.-30          | -1.8 <sup>a</sup> | 3.0  | 0.7  | -0.3 | -0.3 | -1.7 | 0.2 | 0.1  | -1.1 | -1.5 | -1.5 | 0.3  | -1.2 | -1.6 |

... continued on next page ...

Table S29: ... continued from previous page ...

| Complex                      | Ref.              | MNDO | AMI  | PM3  | PM6  | PM7  | OM1  |      | OM2  |      | OM3  |      | OM3  |      | D3T  |
|------------------------------|-------------------|------|------|------|------|------|------|------|------|------|------|------|------|------|------|
|                              |                   |      |      |      |      |      | OM1  | OM2  | D2   | D3   | D3T  | D2   | D3   | D3T  |      |
| Ethylene-Pentane.1.y.+30     | -1.8 <sup>a</sup> | 3.1  | 0.7  | -0.3 | -0.3 | -1.7 | 0.2  | 0.1  | -1.1 | -1.5 | -1.5 | 0.3  | -1.2 | -1.6 | -1.6 |
| Ethylene-Pentane.1.z.-30     | -1.6 <sup>a</sup> | 3.4  | 0.2  | -0.7 | -0.3 | -1.6 | 0.3  | -0.2 | -1.3 | -1.6 | -1.5 | 0.2  | -1.2 | -1.5 | -1.4 |
| Ethylene-Pentane.1.z.+30     | -1.6 <sup>a</sup> | 3.4  | 0.2  | -0.7 | -0.3 | -1.6 | 0.3  | -0.2 | -1.3 | -1.6 | -1.5 | 0.2  | -1.2 | -1.5 | -1.4 |
| Ethylene-Pentane.2.y.-30     | -1.1 <sup>a</sup> | 1.4  | 0.2  | -0.5 | -0.2 | -1.5 | 0.1  | 0.1  | -0.6 | -1.0 | -0.9 | 0.2  | -0.7 | -1.0 | -1.0 |
| Ethylene-Pentane.2.y.+30     | -1.1 <sup>a</sup> | 1.4  | 0.1  | -0.5 | -0.2 | -1.5 | 0.1  | -0.1 | -0.7 | -1.0 | -1.0 | 0.1  | -0.8 | -1.1 | -1.0 |
| Ethylene-Pentane.2.z.-30     | -1.2 <sup>a</sup> | 2.0  | 0.3  | -0.3 | -0.1 | -1.2 | 0.2  | 0.1  | -0.7 | -1.0 | -0.9 | 0.2  | -0.7 | -1.0 | -1.0 |
| Ethylene-Pentane.2.z.+30     | -1.2 <sup>a</sup> | 2.0  | 0.3  | -0.3 | -0.1 | -1.2 | 0.2  | 0.1  | -0.7 | -1.0 | -0.9 | 0.2  | -0.7 | -1.0 | -1.0 |
| Peptide-Pentane.1.y.-30      | -1.8 <sup>a</sup> | 3.4  | -0.0 | -0.8 | -0.3 | -2.2 | 0.5  | -0.1 | -1.3 | -1.6 | -1.6 | 0.3  | -1.2 | -1.5 | -1.4 |
| Peptide-Pentane.1.y.+30      | -2.4 <sup>a</sup> | 5.2  | -0.2 | -1.2 | -0.7 | -2.8 | 0.5  | -0.5 | -2.1 | -2.5 | -2.5 | 0.1  | -2.0 | -2.3 | -2.2 |
| Peptide-Pentane.1.z.-30      | -3.0 <sup>a</sup> | 6.7  | 0.4  | -1.0 | -0.7 | -3.2 | 0.6  | -0.2 | -2.5 | -3.0 | -2.9 | 0.4  | -2.4 | -3.0 | -2.8 |
| Peptide-Pentane.1.z.+30      | -3.2 <sup>a</sup> | 6.6  | -0.0 | -0.2 | -0.9 | -3.0 | 0.2  | -0.4 | -2.2 | -2.8 | -2.7 | 0.0  | -2.3 | -2.8 | -2.7 |
| Peptide-Pentane.2.y.-30      | -1.9 <sup>a</sup> | 3.5  | 0.4  | -0.1 | -0.3 | -2.1 | 0.3  | -0.1 | -1.3 | -1.8 | -1.7 | 0.2  | -1.4 | -1.8 | -1.7 |
| Peptide-Pentane.2.y.+30      | -1.6 <sup>a</sup> | 2.5  | -0.1 | -0.7 | -0.3 | -2.0 | 0.3  | -0.3 | -1.3 | -1.7 | -1.6 | 0.0  | -1.2 | -1.5 | -1.4 |
| Peptide-Pentane.2.z.-30      | -2.6 <sup>a</sup> | 6.2  | 0.1  | -0.4 | -0.9 | -3.3 | 0.5  | -0.4 | -2.2 | -2.8 | -2.6 | 0.1  | -2.3 | -2.7 | -2.6 |
| Peptide-Pentane.2.z.+30      | -2.6 <sup>a</sup> | 5.3  | 0.1  | -0.9 | -0.2 | -2.9 | 0.8  | -0.1 | -2.0 | -2.5 | -2.4 | 0.4  | -1.9 | -2.3 | -2.2 |
| Benzene-Cyclopentane.1.y.-30 | -2.6 <sup>a</sup> | 5.1  | 0.7  | -0.7 | -0.3 | -3.1 | 0.6  | 0.1  | -1.9 | -2.4 | -2.3 | 0.5  | -1.9 | -2.4 | -2.3 |
| Benzene-Cyclopentane.1.y.+30 | -2.4 <sup>a</sup> | 3.9  | 0.4  | -0.8 | -0.4 | -3.5 | 0.5  | 0.0  | -1.7 | -2.3 | -2.2 | 0.4  | -1.8 | -2.3 | -2.2 |
| Benzene-Cyclopentane.1.z.-30 | -2.1 <sup>a</sup> | 3.2  | 0.4  | -0.4 | -0.3 | -3.4 | 0.4  | 0.1  | -1.5 | -2.1 | -1.9 | 0.3  | -1.5 | -2.1 | -2.0 |
| Benzene-Cyclopentane.1.z.+30 | -2.4 <sup>a</sup> | 5.2  | 0.5  | -0.9 | -0.3 | -3.0 | 0.7  | 0.0  | -1.6 | -2.4 | -2.3 | 0.5  | -1.8 | -2.3 | -2.2 |
| Benzene-Cyclopentane.2.y.-30 | -2.3 <sup>a</sup> | 3.9  | 0.5  | -0.6 | -0.3 | -3.3 | 0.5  | 0.0  | -1.6 | -2.2 | -2.1 | 0.4  | -1.7 | -2.3 | -2.1 |
| Benzene-Cyclopentane.2.y.+30 | -2.5 <sup>a</sup> | 4.5  | 0.5  | -0.7 | -0.4 | -3.8 | 0.6  | 0.0  | -1.8 | -2.5 | -2.4 | 0.4  | -1.9 | -2.5 | -2.4 |
| Benzene-Cyclopentane.2.z.-30 | -2.2 <sup>a</sup> | 3.7  | 0.3  | -0.7 | -0.3 | -3.3 | 0.5  | 0.0  | -1.5 | -2.1 | -2.0 | 0.4  | -1.6 | -2.1 | -2.0 |
| Benzene-Cyclopentane.2.z.+30 | -2.1 <sup>a</sup> | 4.4  | 0.7  | -0.3 | -0.4 | -3.2 | 0.6  | 0.1  | -1.6 | -2.2 | -2.1 | 0.4  | -1.7 | -2.2 | -2.1 |
| Benzene-Neopentane.1.y.-30   | -2.0 <sup>a</sup> | 2.9  | 0.2  | -0.7 | -0.4 | -2.9 | 0.3  | -0.2 | -1.6 | -2.1 | -2.0 | 0.1  | -1.6 | -2.1 | -2.0 |
| Benzene-Neopentane.1.y.+30   | -2.0 <sup>a</sup> | 2.9  | 0.2  | -0.7 | -0.4 | -2.9 | 0.3  | -0.2 | -1.6 | -2.1 | -2.0 | 0.1  | -1.6 | -2.1 | -2.0 |
| Benzene-Neopentane.1.z.-30   | -1.7 <sup>a</sup> | 2.3  | 0.2  | -0.4 | -0.4 | -2.8 | 0.2  | -0.2 | -1.4 | -1.9 | -1.8 | 0.0  | -1.4 | -1.9 | -1.8 |
| Benzene-Neopentane.1.z.+30   | -2.1 <sup>a</sup> | 3.6  | 0.1  | -1.1 | -0.5 | -2.9 | 0.3  | -0.2 | -1.7 | -2.2 | -2.2 | 0.2  | -1.7 | -2.2 | -2.1 |
| Benzene-Neopentane.2.y.-30   | -2.3 <sup>a</sup> | 3.8  | 0.5  | -0.5 | -0.5 | -3.3 | 0.4  | -0.1 | -1.7 | -2.4 | -2.2 | 0.2  | -1.8 | -2.4 | -2.3 |
| Benzene-Neopentane.2.y.+30   | -2.3 <sup>a</sup> | 3.8  | 0.5  | -0.5 | -0.5 | -3.3 | 0.4  | -0.1 | -1.7 | -2.4 | -2.2 | 0.2  | -1.8 | -2.4 | -2.3 |
| Benzene-Neopentane.2.z.-30   | -2.2 <sup>a</sup> | 3.1  | 0.2  | -0.7 | -0.5 | -3.3 | 0.2  | -0.3 | -1.7 | -2.3 | -2.2 | 0.0  | -1.8 | -2.3 | -2.2 |
| Benzene-Neopentane.2.z.+30   | -2.2 <sup>a</sup> | 4.1  | 0.8  | -0.0 | -0.4 | -3.1 | 0.5  | 0.1  | -1.6 | -2.1 | -2.0 | 0.4  | -1.7 | -2.2 | -2.1 |
| Uracil-Pentane.1.y.-30       | -2.8 <sup>a</sup> | 6.8  | 0.1  | 0.6  | -1.4 | -3.9 | 0.2  | -0.6 | -2.5 | -3.1 | -2.9 | -0.4 | -2.6 | -3.2 | -3.1 |
| Uracil-Pentane.1.y.+30       | -3.1 <sup>a</sup> | 7.3  | 0.4  | -0.0 | -1.1 | -4.0 | 0.4  | -0.6 | -2.8 | -3.4 | -3.3 | -0.1 | -2.9 | -3.4 | -3.3 |
| Uracil-Pentane.1.z.-30       | -2.9 <sup>a</sup> | 5.3  | 0.3  | -0.2 | -1.1 | -4.5 | 0.2  | -0.4 | -2.5 | -3.2 | -3.0 | -0.2 | -2.7 | -3.4 | -3.2 |
| Uracil-Pentane.1.z.+30       | -3.0 <sup>a</sup> | 6.7  | 0.2  | 0.7  | -1.3 | -3.6 | -0.0 | -0.6 | -2.4 | -3.0 | -2.9 | -0.4 | -2.6 | -3.1 | -3.0 |
| Uracil-Pentane.2.y.-30       | -2.0 <sup>a</sup> | 4.2  | 0.6  | 0.5  | -0.6 | -2.9 | 0.2  | -0.1 | -1.6 | -2.1 | -2.0 | -0.0 | -1.8 | -2.3 | -2.2 |
| Uracil-Pentane.2.y.+30       | -2.3 <sup>a</sup> | 4.2  | 0.6  | 0.4  | -0.5 | -2.9 | 0.2  | -0.2 | -1.7 | -2.3 | -2.1 | 0.0  | -1.9 | -2.3 | -2.2 |
| Uracil-Pentane.2.z.-30       | -2.7 <sup>a</sup> | 6.1  | 0.7  | 0.7  | -0.8 | -4.2 | 0.4  | -0.2 | -2.2 | -2.9 | -2.7 | 0.0  | -2.5 | -3.1 | -2.9 |
| Uracil-Pentane.2.z.+30       | -3.1 <sup>a</sup> | 7.4  | 1.0  | 0.8  | -0.6 | -4.1 | 0.7  | 0.1  | -2.3 | -3.0 | -2.8 | 0.4  | -2.6 | -3.2 | -3.0 |
| Uracil-Cyclopentane.1.y.-30  | -2.6 <sup>a</sup> | 5.7  | 0.3  | 0.5  | -0.9 | -3.1 | 0.2  | -0.3 | -1.9 | -2.4 | -2.3 | -0.1 | -2.1 | -2.6 | -2.5 |
| Uracil-Cyclopentane.1.y.+30  | -2.6 <sup>a</sup> | 5.4  | 0.3  | 0.6  | -0.9 | -3.4 | 0.2  | -0.3 | -1.9 | -2.5 | -2.3 | -0.1 | -2.1 | -2.6 | -2.5 |
| Uracil-Cyclopentane.1.z.-30  | -2.4 <sup>a</sup> | 4.3  | 0.7  | 0.2  | -0.5 | -3.6 | 0.3  | -0.2 | -1.9 | -2.5 | -2.4 | 0.0  | -2.1 | -2.6 | -2.5 |
| Uracil-Cyclopentane.1.z.+30  | -3.4 <sup>a</sup> | 9.4  | 0.4  | 0.6  | -1.2 | -3.6 | 0.7  | -0.5 | -2.9 | -3.4 | -3.3 | 0.0  | -3.0 | -3.4 | -3.3 |
| Uracil-Cyclopentane.2.y.-30  | -2.5 <sup>a</sup> | 5.8  | 0.7  | 0.4  | -0.5 | -3.3 | 0.6  | -0.0 | -1.9 | -2.5 | -2.3 | 0.2  | -2.1 | -2.6 | -2.5 |
| Uracil-Cyclopentane.2.y.+30  | -2.8 <sup>a</sup> | 6.2  | 1.2  | 0.8  | -0.5 | -3.7 | 0.6  | 0.0  | -2.0 | -2.7 | -2.5 | 0.3  | -2.3 | -2.9 | -2.7 |

... continued on next page ...

Table S29: ... continued from previous page ...

| Complex                      | Ref.              | MNDO | AMI  | PM3  | PM6  | PM7  | OM1  |      | OM2  |      | OM3  |      | OM3  |      | D3T  |
|------------------------------|-------------------|------|------|------|------|------|------|------|------|------|------|------|------|------|------|
|                              |                   |      |      |      |      |      | OM1  | OM2  | D2   | D3   | D3T  | D2   | D3   | D3T  |      |
| Uracyl-Cyclopentane.2.z.-30  | -2.5 <sup>a</sup> | 5.7  | 0.3  | 0.5  | -0.7 | -3.4 | 0.4  | -0.2 | -2.0 | -2.5 | -2.4 | -0.0 | -2.2 | -2.6 | -2.5 |
| Uracyl-Cyclopentane.2.z.+30  | -2.7 <sup>a</sup> | 6.3  | 1.1  | 1.1  | -0.5 | -3.3 | 0.7  | -0.1 | -2.0 | -2.6 | -2.4 | 0.2  | -2.2 | -2.7 | -2.6 |
| Uracyl-Neopentane.1.y.-30    | -2.5 <sup>a</sup> | 4.6  | 0.1  | 0.4  | -0.9 | -3.0 | 0.2  | -0.4 | -1.8 | -2.3 | -2.2 | -0.2 | -1.9 | -2.4 | -2.3 |
| Uracyl-Neopentane.1.y.+30    | -2.8 <sup>a</sup> | 5.8  | 0.6  | 1.0  | -0.8 | -2.7 | 0.2  | -0.4 | -2.0 | -2.5 | -2.4 | -0.2 | -2.2 | -2.6 | -2.5 |
| Uracyl-Neopentane.1.z.-30    | -2.2 <sup>a</sup> | 3.2  | 0.6  | 0.3  | -0.5 | -3.0 | 0.1  | -0.3 | -1.6 | -2.2 | -2.1 | -0.1 | -1.8 | -2.3 | -2.2 |
| Uracyl-Neopentane.1.z.+30    | -3.2 <sup>a</sup> | 7.3  | 0.1  | 0.3  | -1.0 | -3.0 | 0.4  | -0.6 | -2.6 | -3.0 | -2.9 | -0.1 | -2.6 | -2.9 | -2.8 |
| Uracyl-Neopentane.2.y.-30    | -2.3 <sup>a</sup> | 4.8  | 0.9  | 0.6  | -0.2 | -3.0 | 0.5  | 0.1  | -1.5 | -2.2 | -2.0 | 0.3  | -1.7 | -2.3 | -2.2 |
| Uracyl-Neopentane.2.y.+30    | -2.6 <sup>a</sup> | 5.7  | 1.1  | 1.0  | -0.4 | -3.0 | 0.6  | -0.0 | -1.9 | -2.5 | -2.4 | 0.2  | -2.1 | -2.6 | -2.5 |
| Uracyl-Neopentane.2.z.-30    | -2.1 <sup>a</sup> | 3.9  | 0.5  | 0.6  | -0.5 | -2.6 | 0.2  | -0.2 | -1.5 | -2.0 | -1.9 | -0.0 | -1.7 | -2.2 | -2.1 |
| Uracyl-Neopentane.2.z.+30    | -2.2 <sup>a</sup> | 4.3  | 0.9  | 0.9  | -0.5 | -2.5 | 0.3  | -0.2 | -1.6 | -2.1 | -2.0 | -0.0 | -1.8 | -2.2 | -2.1 |
| Ethyne-Ethyne_TS.1.y.-30     | -1.5 <sup>a</sup> | 1.5  | -0.4 | -0.8 | -0.5 | -0.8 | -0.3 | -1.1 | -1.6 | -1.7 | -1.7 | -0.7 | -1.2 | -1.3 | -1.3 |
| Ethyne-Ethyne_TS.1.y.+30     | -1.5 <sup>a</sup> | 1.5  | -0.4 | -0.8 | -0.5 | -0.8 | -0.3 | -1.1 | -1.6 | -1.7 | -1.7 | -0.7 | -1.2 | -1.3 | -1.3 |
| Ethyne-Ethyne_TS.1.z.-30     | -1.0 <sup>a</sup> | 1.1  | -0.3 | -0.7 | -0.3 | -0.6 | -0.2 | -0.7 | -1.1 | -1.2 | -1.2 | -0.4 | -0.9 | -1.0 | -1.0 |
| Ethyne-Ethyne_TS.1.z.+30     | -1.0 <sup>a</sup> | 1.1  | -0.3 | -0.7 | -0.3 | -0.6 | -0.2 | -0.7 | -1.1 | -1.2 | -1.2 | -0.4 | -0.9 | -1.0 | -1.0 |
| Ethyne-Ethyne_TS.2.y.-30     | -1.3 <sup>a</sup> | 1.3  | -0.2 | -0.6 | -0.4 | -0.8 | -0.2 | -0.9 | -1.3 | -1.4 | -1.4 | -0.5 | -1.0 | -1.2 | -1.2 |
| Ethyne-Ethyne_TS.2.y.+30     | -1.3 <sup>a</sup> | 1.3  | -0.2 | -0.6 | -0.4 | -0.8 | -0.2 | -0.9 | -1.3 | -1.4 | -1.4 | -0.5 | -1.0 | -1.2 | -1.2 |
| Ethyne-Ethyne_TS.2.z.-30     | -1.4 <sup>a</sup> | 1.3  | -0.2 | -0.6 | -0.4 | -0.8 | -0.3 | -0.9 | -1.3 | -1.5 | -1.5 | -0.6 | -1.1 | -1.2 | -1.2 |
| Ethyne-Ethyne_TS.2.z.+30     | -1.4 <sup>a</sup> | 1.3  | -0.2 | -0.6 | -0.4 | -0.8 | -0.3 | -0.9 | -1.3 | -1.5 | -1.5 | -0.6 | -1.1 | -1.2 | -1.2 |
| Benzene-Water_OH-pi.1.y.-30  | -2.6 <sup>a</sup> | 3.2  | -0.7 | -1.4 | -1.8 | -2.3 | -0.9 | -2.0 | -2.9 | -3.0 | -3.0 | -1.6 | -2.6 | -2.8 | -2.8 |
| Benzene-Water_OH-pi.1.y.+30  | -2.6 <sup>a</sup> | 3.2  | -0.7 | -1.4 | -1.8 | -2.3 | -0.9 | -2.0 | -2.9 | -3.0 | -3.0 | -1.6 | -2.6 | -2.8 | -2.8 |
| Benzene-Water_OH-pi.1.z.-30  | -2.4 <sup>a</sup> | 2.6  | -0.3 | -1.0 | -1.7 | -2.2 | -1.0 | -1.7 | -2.5 | -2.7 | -2.7 | -1.4 | -2.4 | -2.7 | -2.6 |
| Benzene-Water_OH-pi.1.z.+30  | -2.6 <sup>a</sup> | 3.4  | -1.0 | -1.6 | -1.7 | -2.3 | -0.8 | -2.1 | -2.9 | -3.0 | -3.0 | -1.6 | -2.6 | -2.8 | -2.7 |
| Benzene-Water_OH-pi.2.y.-30  | -2.8 <sup>a</sup> | 4.0  | -0.3 | -1.1 | -1.9 | -2.4 | -0.8 | -1.8 | -2.8 | -3.0 | -3.0 | -1.4 | -2.7 | -2.9 | -2.9 |
| Benzene-Water_OH-pi.2.y.+30  | -2.8 <sup>a</sup> | 4.0  | -0.3 | -1.1 | -1.9 | -2.4 | -0.8 | -1.8 | -2.8 | -3.0 | -3.0 | -1.4 | -2.7 | -2.9 | -2.9 |
| Benzene-Water_OH-pi.2.z.-30  | -3.0 <sup>a</sup> | 4.5  | -0.3 | -1.1 | -2.0 | -2.5 | -0.5 | -1.6 | -2.7 | -2.8 | -2.7 | -1.1 | -2.5 | -2.6 | -2.6 |
| Benzene-Water_OH-pi.2.z.+30  | -3.0 <sup>a</sup> | 4.5  | -0.3 | -1.1 | -2.0 | -2.5 | -0.5 | -1.6 | -2.7 | -2.8 | -2.7 | -1.1 | -2.5 | -2.6 | -2.6 |
| Benzene-Ethyne_CH-pi.1.y.-30 | -3.1 <sup>a</sup> | 4.0  | -0.5 | -1.3 | -2.3 | -2.7 | -1.2 | -2.4 | -3.4 | -3.6 | -3.6 | -1.9 | -3.3 | -3.5 | -3.5 |
| Benzene-Ethyne_CH-pi.1.y.+30 | -2.1 <sup>a</sup> | 2.5  | -0.2 | -0.8 | -0.8 | -1.6 | -0.3 | -1.6 | -2.4 | -2.6 | -2.6 | -0.9 | -1.9 | -2.2 | -2.2 |
| Benzene-Ethyne_CH-pi.1.y.-30 | -2.1 <sup>a</sup> | 2.5  | -0.2 | -0.8 | -0.8 | -1.6 | -0.3 | -1.6 | -2.4 | -2.6 | -2.6 | -0.9 | -1.9 | -2.2 | -2.2 |
| Benzene-Ethyne_CH-pi.1.y.+30 | -2.1 <sup>a</sup> | 2.5  | -0.2 | -0.8 | -0.8 | -1.6 | -0.3 | -1.6 | -2.4 | -2.6 | -2.6 | -0.9 | -1.9 | -2.2 | -2.2 |
| Benzene-Ethyne_CH-pi.1.z.-30 | -2.1 <sup>a</sup> | 2.5  | -0.2 | -0.8 | -0.8 | -1.6 | -0.3 | -1.6 | -2.4 | -2.6 | -2.6 | -0.9 | -1.9 | -2.2 | -2.2 |
| Benzene-Ethyne_CH-pi.1.z.+30 | -2.1 <sup>a</sup> | 2.5  | -0.2 | -0.8 | -0.8 | -1.6 | -0.3 | -1.6 | -2.4 | -2.6 | -2.6 | -0.9 | -1.9 | -2.2 | -2.2 |
| Benzene-Ethyne_CH-pi.2.y.-30 | -2.7 <sup>a</sup> | 4.6  | 0.2  | -0.4 | -0.9 | -2.0 | -0.0 | -1.5 | -2.7 | -2.9 | -2.9 | -0.6 | -2.2 | -2.4 | -2.4 |
| Benzene-Ethyne_CH-pi.2.y.+30 | -2.7 <sup>a</sup> | 4.6  | 0.2  | -0.4 | -0.9 | -2.0 | -0.0 | -1.5 | -2.7 | -2.9 | -2.9 | -0.6 | -2.2 | -2.4 | -2.4 |
| Benzene-Ethyne_CH-pi.2.z.-30 | -2.7 <sup>a</sup> | 4.6  | 0.2  | -0.4 | -0.9 | -2.0 | -0.0 | -1.5 | -2.7 | -2.9 | -2.9 | -0.6 | -2.2 | -2.4 | -2.4 |
| Benzene-Ethyne_CH-pi.2.z.+30 | -2.7 <sup>a</sup> | 4.6  | 0.2  | -0.4 | -0.9 | -2.0 | -0.0 | -1.5 | -2.7 | -2.9 | -2.9 | -0.6 | -2.2 | -2.4 | -2.4 |
| Benzene-MeOH_OH-pi.1.y.-30   | -3.5 <sup>a</sup> | 5.3  | -0.3 | -1.3 | -1.5 | -2.9 | -0.5 | -1.7 | -3.1 | -3.3 | -3.3 | -1.2 | -2.8 | -3.2 | -3.1 |
| Benzene-MeOH_OH-pi.1.y.+30   | -3.5 <sup>a</sup> | 5.3  | -0.3 | -1.3 | -1.5 | -2.9 | -0.5 | -1.7 | -3.1 | -3.4 | -3.3 | -1.2 | -2.8 | -3.2 | -3.1 |
| Benzene-MeOH_OH-pi.1.z.-30   | -3.3 <sup>a</sup> | 4.7  | -0.7 | -1.4 | -1.5 | -2.9 | -0.5 | -2.0 | -3.1 | -3.4 | -3.3 | -1.4 | -2.7 | -3.0 | -3.0 |
| Benzene-MeOH_OH-pi.1.z.+30   | -3.1 <sup>a</sup> | 4.7  | 0.2  | -0.7 | -1.2 | -2.4 | -0.5 | -1.0 | -2.5 | -2.7 | -2.7 | -0.7 | -2.4 | -2.7 | -2.7 |
| Benzene-MeOH_OH-pi.2.y.-30   | -3.5 <sup>a</sup> | 5.7  | 0.2  | -0.8 | -1.6 | -3.0 | -0.4 | -1.3 | -2.9 | -3.2 | -3.1 | -0.8 | -2.8 | -3.2 | -3.1 |
| Benzene-MeOH_OH-pi.2.y.+30   | -3.5 <sup>a</sup> | 5.8  | 0.2  | -0.8 | -1.6 | -3.0 | -0.4 | -1.3 | -2.9 | -3.2 | -3.1 | -0.8 | -2.9 | -3.2 | -3.1 |
| Benzene-MeOH_OH-pi.2.z.-30   | -2.6 <sup>a</sup> | 3.2  | 0.3  | -0.4 | -1.2 | -2.6 | -0.5 | -1.0 | -2.3 | -2.7 | -2.6 | -0.8 | -2.4 | -2.8 | -2.7 |
| Benzene-MeOH_OH-pi.2.z.+30   | -3.3 <sup>a</sup> | 6.1  | -0.1 | -0.9 | -1.6 | -3.0 | -0.1 | -1.1 | -2.5 | -2.7 | -2.6 | -0.6 | -2.4 | -2.5 | -2.5 |
| Benzene-MeNH2_NH-pi.1.y.-30  | -2.5 <sup>a</sup> | 3.9  | -0.1 | -0.7 | -1.1 | -3.0 | -0.2 | -0.9 | -2.2 | -2.5 | -2.5 | -0.4 | -2.0 | -2.4 | -2.3 |
| Benzene-MeNH2_NH-pi.1.y.+30  | -2.3 <sup>a</sup> | 3.3  | -0.0 | -0.5 | -1.0 | -3.0 | -0.2 | -0.7 | -1.9 | -2.3 | -2.3 | -0.4 | -1.9 | -2.3 | -2.2 |
| Benzene-MeNH2_NH-pi.1.z.-30  | -2.2 <sup>a</sup> | 3.5  | 0.2  | -0.5 | -0.8 | -2.5 | -0.1 | -0.5 | -1.8 | -2.1 | -2.1 | -0.2 | -1.7 | -2.1 | -2.1 |

... continued on next page ...

Table S29: ... continued from previous page ...

| Complex                                 | Ref.              | MNDO | AMI  | PM3  | PM6  | PM7  | OM1  |      | OM2  |      | OM3  |      | OM3  |      | D3T |
|-----------------------------------------|-------------------|------|------|------|------|------|------|------|------|------|------|------|------|------|-----|
|                                         |                   |      |      |      |      |      | OM1  | OM2  | D2   | D3   | D3T  | D2   | D3   | D3T  |     |
| Benzene-MeNH <sub>2</sub> NH-pi.1.z.+30 | -2.3 <sup>a</sup> | 3.1  | -0.5 | -0.8 | -1.2 | -3.2 | -0.3 | -1.1 | -2.1 | -2.4 | -0.6 | -1.9 | -2.3 | -2.2 |     |
| Benzene-MeNH <sub>2</sub> NH-pi.2.y.-30 | -2.4 <sup>a</sup> | 3.9  | 0.6  | -0.2 | -0.8 | -2.8 | 0.1  | -0.3 | -1.7 | -2.1 | -0.3 | -1.8 | -2.2 | -2.2 |     |
| Benzene-MeNH <sub>2</sub> NH-pi.2.y.+30 | -3.0 <sup>a</sup> | 4.9  | -0.0 | -0.6 | -1.6 | -3.7 | -0.4 | -1.1 | -2.7 | -3.1 | -0.6 | -2.6 | -3.1 | -3.0 |     |
| Benzene-MeNH <sub>2</sub> NH-pi.2.z.-30 | -2.4 <sup>a</sup> | 4.5  | 0.1  | -0.4 | -1.0 | -2.9 | 0.2  | -0.4 | -1.8 | -2.0 | 0.1  | -1.6 | -1.9 | -1.9 |     |
| Benzene-MeNH <sub>2</sub> NH-pi.2.z.+30 | -1.9 <sup>a</sup> | 2.4  | 0.2  | -0.4 | -0.8 | -2.9 | -0.2 | -0.5 | -1.6 | -2.1 | -0.4 | -1.7 | -2.2 | -2.1 |     |
| Benzene-AcOH.OH-pi.1.y.-30              | -3.9 <sup>a</sup> | 5.5  | -0.5 | -1.4 | -2.1 | -3.3 | -0.7 | -2.4 | -3.7 | -4.0 | -1.7 | -3.2 | -3.6 | -3.6 |     |
| Benzene-AcOH.OH-pi.1.y.+30              | -3.9 <sup>a</sup> | 5.6  | -0.6 | -1.4 | -2.1 | -3.3 | -0.7 | -2.5 | -3.8 | -4.1 | -1.7 | -3.3 | -3.6 | -3.6 |     |
| Benzene-AcOH.OH-pi.1.z.-30              | -3.6 <sup>a</sup> | 5.2  | -0.2 | -1.0 | -2.0 | -3.4 | -0.6 | -1.8 | -3.1 | -3.3 | -1.2 | -2.9 | -3.1 | -3.1 |     |
| Benzene-AcOH.OH-pi.1.z.+30              | -4.2 <sup>a</sup> | 6.1  | -1.2 | -1.6 | -2.2 | -3.2 | -1.0 | -2.9 | -4.1 | -4.3 | -2.0 | -3.5 | -3.8 | -3.8 |     |
| Benzene-AcOH.OH-pi.2.y.-30              | -4.2 <sup>a</sup> | 6.9  | 0.1  | -0.9 | -2.0 | -3.5 | -0.5 | -2.1 | -3.7 | -4.0 | -1.4 | -3.3 | -3.7 | -3.7 |     |
| Benzene-AcOH.OH-pi.2.y.+30              | -4.3 <sup>a</sup> | 7.1  | 0.1  | -0.8 | -2.1 | -3.6 | -0.6 | -2.2 | -3.9 | -4.1 | -1.4 | -3.5 | -3.9 | -3.8 |     |
| Benzene-AcOH.OH-pi.2.z.-30              | -2.1 <sup>a</sup> | 2.7  | 0.7  | 0.5  | -0.9 | -2.4 | -0.5 | -0.6 | -1.6 | -2.0 | -0.6 | -1.8 | -2.2 | -2.1 |     |
| Benzene-AcOH.OH-pi.2.z.+30              | -2.6 <sup>a</sup> | 4.2  | 0.1  | -0.7 | -1.2 | -2.3 | -0.1 | -0.7 | -1.8 | -2.1 | -0.4 | -1.7 | -2.0 | -2.0 |     |
| Benzene-AcNH <sub>2</sub> NH-pi.1.y.-30 | -3.7 <sup>a</sup> | 5.1  | -1.1 | -0.8 | -2.0 | -3.3 | -1.0 | -2.4 | -3.7 | -3.9 | -1.7 | -3.3 | -3.6 | -3.5 |     |
| Benzene-AcNH <sub>2</sub> NH-pi.1.y.+30 | -3.7 <sup>a</sup> | 5.1  | -1.2 | -0.9 | -2.1 | -3.3 | -1.0 | -2.5 | -3.8 | -4.0 | -1.8 | -3.3 | -3.6 | -3.6 |     |
| Benzene-AcNH <sub>2</sub> NH-pi.1.z.-30 | -4.4 <sup>a</sup> | 6.5  | -0.4 | -0.7 | -2.4 | -4.2 | -0.7 | -2.4 | -4.2 | -4.5 | -1.5 | -3.7 | -4.0 | -4.0 |     |
| Benzene-AcNH <sub>2</sub> NH-pi.1.z.+30 | -3.7 <sup>a</sup> | 5.1  | -1.0 | -0.7 | -1.7 | -2.6 | -0.9 | -1.9 | -3.1 | -3.3 | -1.3 | -2.9 | -3.1 | -3.1 |     |
| Benzene-AcNH <sub>2</sub> NH-pi.2.y.-30 | -4.0 <sup>a</sup> | 5.2  | -0.8 | -0.7 | -2.2 | -3.5 | -1.1 | -2.6 | -4.0 | -4.3 | -1.9 | -3.6 | -4.0 | -3.9 |     |
| Benzene-AcNH <sub>2</sub> NH-pi.2.y.+30 | -4.0 <sup>a</sup> | 5.2  | -0.9 | -0.7 | -2.2 | -3.5 | -1.1 | -2.6 | -4.0 | -4.3 | -1.9 | -3.6 | -4.0 | -3.9 |     |
| Benzene-AcNH <sub>2</sub> NH-pi.2.z.-30 | -2.1 <sup>a</sup> | 3.0  | -0.2 | 0.2  | -1.1 | -2.1 | -0.6 | -1.2 | -1.9 | -2.2 | -0.9 | -1.9 | -2.1 | -2.1 |     |
| Benzene-AcNH <sub>2</sub> NH-pi.2.z.+30 | -3.5 <sup>a</sup> | 4.0  | -1.2 | -1.5 | -1.9 | -3.5 | -0.8 | -2.4 | -3.6 | -3.9 | -1.7 | -3.0 | -3.4 | -3.3 |     |
| Benzene-Peptide.NH-pi.1.y.-30           | -4.1 <sup>a</sup> | 5.4  | -0.7 | -1.4 | -1.7 | -4.5 | -0.4 | -1.7 | -3.5 | -4.0 | -1.0 | -3.2 | -3.7 | -3.6 |     |
| Benzene-Peptide.NH-pi.1.y.+30           | -4.1 <sup>a</sup> | 5.3  | -0.1 | -0.7 | -1.7 | -4.4 | -0.6 | -1.7 | -3.5 | -4.1 | -1.0 | -3.4 | -3.9 | -3.8 |     |
| Benzene-Peptide.NH-pi.1.z.-30           | -3.9 <sup>a</sup> | 5.5  | -0.8 | -1.6 | -1.7 | -4.5 | -0.3 | -1.6 | -3.4 | -3.9 | -0.8 | -3.0 | -3.5 | -3.4 |     |
| Benzene-Peptide.NH-pi.1.z.+30           | -3.8 <sup>a</sup> | 5.4  | -0.1 | -0.8 | -1.5 | -3.9 | -0.4 | -1.5 | -3.3 | -3.7 | -0.8 | -3.1 | -3.5 | -3.4 |     |
| Benzene-Peptide.NH-pi.2.y.-30           | -4.9 <sup>a</sup> | 7.3  | -0.3 | -1.1 | -2.3 | -5.3 | -0.4 | -1.9 | -4.2 | -4.7 | -1.0 | -3.9 | -4.4 | -4.3 |     |
| Benzene-Peptide.NH-pi.2.y.+30           | -4.6 <sup>a</sup> | 7.0  | 0.5  | -0.4 | -1.9 | -4.9 | -0.3 | -1.4 | -3.8 | -4.4 | -0.8 | -3.8 | -4.3 | -4.2 |     |
| Benzene-Peptide.NH-pi.2.z.-30           | -3.1 <sup>a</sup> | 3.8  | 0.3  | -0.5 | -1.2 | -3.6 | -0.4 | -1.1 | -2.6 | -3.1 | -0.7 | -2.6 | -3.1 | -3.0 |     |
| Benzene-Peptide.NH-pi.2.z.+30           | -3.2 <sup>a</sup> | 3.7  | -0.4 | -1.2 | -1.5 | -4.1 | -0.4 | -1.5 | -3.0 | -3.5 | -0.9 | -2.8 | -3.3 | -3.2 |     |
| Benzene-Benzene.TS.1.y.-30              | -2.0 <sup>a</sup> | 2.8  | 0.1  | -0.6 | -0.6 | -2.5 | 0.1  | -0.6 | -1.8 | -2.2 | -0.2 | -1.6 | -2.1 | -2.1 |     |
| Benzene-Benzene.TS.1.y.+30              | -2.1 <sup>a</sup> | 2.9  | 0.3  | -0.4 | -0.6 | -2.6 | 0.1  | -0.6 | -1.9 | -2.4 | -0.2 | -1.8 | -2.3 | -2.2 |     |
| Benzene-Benzene.TS.1.z.-30              | -1.8 <sup>a</sup> | 2.4  | -0.0 | -0.6 | -0.6 | -2.6 | 0.1  | -0.6 | -1.7 | -2.1 | -0.3 | -1.5 | -2.0 | -1.9 |     |
| Benzene-Benzene.TS.1.z.+30              | -2.1 <sup>a</sup> | 3.5  | 0.4  | -0.6 | -0.6 | -2.3 | 0.2  | -0.5 | -1.8 | -2.2 | -0.0 | -1.7 | -2.2 | -2.1 |     |
| Benzene-Benzene.TS.2.y.-30              | -2.8 <sup>a</sup> | 5.3  | 0.7  | -0.2 | -0.8 | -3.2 | 0.5  | -0.5 | -2.3 | -2.8 | 0.1  | -2.1 | -2.6 | -2.6 |     |
| Benzene-Benzene.TS.2.y.+30              | -2.7 <sup>a</sup> | 5.1  | 1.2  | 0.2  | -0.7 | -3.3 | 0.4  | -0.3 | -2.2 | -2.7 | 0.2  | -2.2 | -2.8 | -2.7 |     |
| Benzene-Benzene.TS.2.z.-30              | -1.9 <sup>a</sup> | 2.9  | 0.1  | -0.6 | -0.5 | -2.7 | 0.2  | -0.5 | -1.7 | -2.2 | -0.1 | -1.6 | -2.1 | -2.0 |     |
| Benzene-Benzene.TS.2.z.+30              | -2.8 <sup>a</sup> | 5.4  | 0.5  | -0.4 | -0.7 | -3.3 | 0.6  | -0.6 | -2.3 | -2.7 | 0.1  | -2.0 | -2.5 | -2.5 |     |
| Pyridine-Pyridine.TS.1.y.-30            | -2.6 <sup>a</sup> | 3.8  | 0.2  | -0.1 | -1.0 | -2.7 | -0.1 | -1.1 | -2.4 | -2.8 | -0.5 | -2.2 | -2.6 | -2.6 |     |
| Pyridine-Pyridine.TS.1.y.+30            | -1.9 <sup>a</sup> | 3.8  | 0.2  | -0.1 | -1.0 | -2.7 | -0.1 | -1.1 | -2.4 | -2.8 | -0.5 | -2.2 | -2.6 | -2.6 |     |
| Pyridine-Pyridine.TS.1.z.-30            | -2.6 <sup>a</sup> | 3.8  | 0.1  | -0.4 | -0.6 | -2.7 | 0.2  | -0.7 | -1.8 | -2.3 | -0.3 | -1.6 | -2.1 | -2.1 |     |
| Pyridine-Pyridine.TS.1.z.+30            | -3.1 <sup>a</sup> | 4.0  | 0.5  | 0.4  | -1.3 | -3.0 | -0.6 | -1.5 | -2.6 | -3.1 | -1.1 | -2.5 | -3.0 | -2.9 |     |
| Pyridine-Pyridine.TS.2.y.-30            | -3.3 <sup>a</sup> | 6.2  | 1.0  | 1.0  | -1.1 | -3.3 | 0.1  | -1.0 | -2.8 | -3.3 | -0.4 | -2.7 | -3.2 | -3.1 |     |
| Pyridine-Pyridine.TS.2.y.+30            | -3.3 <sup>a</sup> | 6.2  | 1.0  | 1.0  | -1.1 | -3.4 | 0.1  | -1.0 | -2.8 | -3.3 | -0.4 | -2.7 | -3.2 | -3.1 |     |
| Pyridine-Pyridine.TS.2.z.-30            | -2.4 <sup>a</sup> | 3.8  | 0.7  | 0.4  | -0.8 | -2.8 | 0.1  | -1.1 | -2.1 | -2.5 | -0.6 | -1.9 | -2.4 | -2.3 |     |
| Pyridine-Pyridine.TS.2.z.+30            | -2.9 <sup>a</sup> | 6.0  | 0.5  | 0.3  | -0.7 | -3.1 | 0.8  | -0.7 | -2.3 | -2.7 | 0.1  | -2.0 | -2.4 | -2.3 |     |

... continued on next page ...

Table S29: ... continued from previous page ...

| Complex                    | Ref.              | MNDO | AMI  | PM3  | PM6  | PM7  | OM1  |      | OM2  |      | OM3  |      | OM3  |      | D3T  |
|----------------------------|-------------------|------|------|------|------|------|------|------|------|------|------|------|------|------|------|
|                            |                   |      |      |      |      |      | OM1  | OM2  | D2   | D3   | D3T  | D2   | D3   | D3T  |      |
| Benzene-Pyridine_TS.1.y-30 | -2.4 <sup>a</sup> | 2.9  | 0.1  | -0.6 | -0.8 | -2.7 | -0.1 | -1.0 | -2.2 | -2.7 | -2.6 | -0.5 | -2.0 | -2.5 | -2.4 |
| Benzene-Pyridine_TS.1.y+30 | -2.4 <sup>a</sup> | 2.9  | 0.0  | -0.6 | -0.8 | -2.7 | -0.1 | -1.0 | -2.2 | -2.6 | -2.6 | -0.5 | -2.0 | -2.5 | -2.4 |
| Benzene-Pyridine_TS.1.z-30 | -2.4 <sup>a</sup> | 3.7  | 0.2  | -0.7 | -0.8 | -2.5 | -0.0 | -0.8 | -2.1 | -2.6 | -2.5 | -0.3 | -2.0 | -2.4 | -2.4 |
| Benzene-Pyridine_TS.1.z+30 | -2.1 <sup>a</sup> | 2.5  | -0.2 | -0.8 | -0.8 | -2.8 | -0.1 | -1.0 | -2.1 | -2.5 | -2.5 | -0.5 | -1.8 | -2.2 | -2.2 |
| Benzene-Pyridine_TS.2.y-30 | -3.2 <sup>a</sup> | 5.5  | 0.8  | -0.1 | -1.1 | -3.6 | 0.2  | -0.9 | -2.8 | -3.3 | -3.2 | -0.2 | -2.6 | -3.1 | -3.0 |
| Benzene-Pyridine_TS.2.y+30 | -3.2 <sup>a</sup> | 5.5  | 0.7  | -0.2 | -1.1 | -3.5 | 0.2  | -0.9 | -2.8 | -3.3 | -3.2 | -0.2 | -2.6 | -3.1 | -3.0 |
| Benzene-Pyridine_TS.2.z-30 | -3.2 <sup>a</sup> | 5.5  | 0.2  | -0.6 | -1.1 | -3.6 | 0.4  | -1.1 | -2.8 | -3.2 | -3.2 | -0.2 | -2.4 | -2.8 | -2.8 |
| Benzene-Pyridine_TS.2.z+30 | -2.2 <sup>a</sup> | 2.9  | -0.1 | -0.8 | -0.8 | -2.9 | -0.1 | -0.9 | -2.1 | -2.6 | -2.5 | -0.4 | -1.9 | -2.4 | -2.3 |
| Ethylene-Water_CH-O.1.y-30 | -2.4 <sup>a</sup> | 2.4  | -1.6 | -0.7 | -1.5 | -1.4 | -1.6 | -2.5 | -2.8 | -2.8 | -2.8 | -2.3 | -2.6 | -2.7 | -2.7 |
| Ethylene-Water_CH-O.1.y+30 | -2.4 <sup>a</sup> | 2.6  | -1.5 | -0.6 | -1.5 | -1.4 | -1.5 | -2.4 | -2.7 | -2.7 | -2.7 | -2.2 | -2.5 | -2.6 | -2.6 |
| Ethylene-Water_CH-O.1.z-30 | -2.5 <sup>a</sup> | 2.4  | -1.5 | -0.7 | -1.5 | -1.4 | -1.6 | -2.5 | -2.7 | -2.8 | -2.8 | -2.3 | -2.6 | -2.7 | -2.7 |
| Ethylene-Water_CH-O.1.z+30 | -2.5 <sup>a</sup> | 2.4  | -1.5 | -0.7 | -1.5 | -1.4 | -1.6 | -2.4 | -2.7 | -2.8 | -2.8 | -2.2 | -2.6 | -2.6 | -2.6 |
| Ethylene-Water_CH-O.2.y-30 | -2.8 <sup>a</sup> | 3.4  | -1.8 | -0.7 | -1.7 | -1.4 | -1.7 | -2.7 | -3.0 | -3.1 | -3.1 | -2.4 | -2.8 | -2.9 | -2.9 |
| Ethylene-Water_CH-O.2.y+30 | -2.8 <sup>a</sup> | 3.4  | -1.8 | -0.6 | -1.7 | -1.5 | -1.8 | -3.0 | -3.3 | -3.3 | -3.3 | -2.6 | -3.0 | -3.1 | -3.1 |
| Ethylene-Water_CH-O.2.z-30 | -2.4 <sup>a</sup> | 3.5  | -1.6 | -0.5 | -1.5 | -1.3 | -1.4 | -2.6 | -2.9 | -2.9 | -2.9 | -2.2 | -2.6 | -2.6 | -2.6 |
| Ethylene-Water_CH-O.2.z+30 | -2.4 <sup>a</sup> | 3.5  | -1.6 | -0.5 | -1.4 | -1.3 | -1.4 | -2.5 | -2.8 | -2.9 | -2.9 | -2.1 | -2.5 | -2.6 | -2.6 |
| Ethylene-AcOH_OH-pi.1.y-30 | -4.8 <sup>a</sup> | 5.8  | -1.4 | -1.9 | -1.8 | -2.3 | -1.4 | -3.8 | -4.7 | -4.7 | -4.8 | -2.7 | -3.8 | -4.0 | -4.0 |
| Ethylene-AcOH_OH-pi.1.y+30 | -4.8 <sup>a</sup> | 5.8  | -1.4 | -1.9 | -1.8 | -2.3 | -1.4 | -3.8 | -4.7 | -4.7 | -4.8 | -2.7 | -3.8 | -4.0 | -4.0 |
| Ethylene-AcOH_OH-pi.1.z-30 | -3.1 <sup>a</sup> | 3.4  | -0.9 | -1.8 | -1.3 | -1.9 | -0.8 | -2.2 | -2.9 | -3.0 | -3.0 | -1.6 | -2.4 | -2.6 | -2.6 |
| Ethylene-AcOH_OH-pi.1.z+30 | -3.9 <sup>a</sup> | 5.3  | -1.8 | -1.4 | -1.8 | -1.9 | -1.3 | -3.0 | -3.7 | -3.8 | -3.8 | -2.0 | -3.0 | -3.1 | -3.1 |
| Ethylene-AcOH_OH-pi.2.y-30 | -4.3 <sup>a</sup> | 5.2  | -1.3 | -1.6 | -1.8 | -2.3 | -1.5 | -3.4 | -4.3 | -4.3 | -4.3 | -2.4 | -3.5 | -3.7 | -3.7 |
| Ethylene-AcOH_OH-pi.2.y+30 | -4.3 <sup>a</sup> | 5.2  | -1.3 | -1.6 | -1.8 | -2.3 | -1.5 | -3.4 | -4.3 | -4.3 | -4.3 | -2.4 | -3.5 | -3.7 | -3.7 |
| Ethylene-AcOH_OH-pi.2.z-30 | -2.6 <sup>a</sup> | 2.4  | -0.9 | -0.4 | -1.4 | -1.6 | -1.4 | -2.2 | -2.7 | -2.9 | -2.9 | -1.8 | -2.4 | -2.6 | -2.6 |
| Ethylene-AcOH_OH-pi.2.z+30 | -3.4 <sup>a</sup> | 4.1  | -0.9 | -1.8 | -1.1 | -1.8 | -0.6 | -2.3 | -3.0 | -3.1 | -3.1 | -1.6 | -2.4 | -2.6 | -2.6 |
| Peptide-Ethene.1.y-30      | -2.2 <sup>a</sup> | 3.1  | -0.3 | 0.1  | -0.9 | -1.8 | -0.4 | -0.9 | -1.6 | -1.9 | -1.9 | -0.7 | -1.6 | -1.9 | -1.8 |
| Peptide-Ethene.1.y+30      | -1.9 <sup>a</sup> | 3.1  | 0.1  | -0.4 | -0.7 | -2.0 | -0.1 | -0.6 | -1.6 | -2.0 | -2.0 | -0.3 | -1.6 | -2.0 | -1.9 |
| Peptide-Ethene.1.z-30      | -1.3 <sup>a</sup> | 2.2  | -0.1 | -0.6 | -0.4 | -1.7 | 0.2  | -0.6 | -1.3 | -1.6 | -1.5 | -0.2 | -1.1 | -1.4 | -1.4 |
| Peptide-Ethene.1.z+30      | -2.0 <sup>a</sup> | 2.7  | -0.2 | -0.7 | -0.9 | -1.8 | -0.2 | -0.9 | -1.8 | -2.1 | -2.0 | -0.6 | -1.7 | -1.9 | -1.9 |
| Peptide-Ethene.2.y-30      | -2.0 <sup>a</sup> | 4.0  | -0.3 | -0.3 | -0.8 | -2.0 | 0.1  | -0.7 | -1.7 | -1.9 | -1.9 | -0.4 | -1.5 | -1.8 | -1.8 |
| Peptide-Ethene.2.y+30      | -2.3 <sup>a</sup> | 4.3  | 0.4  | 0.2  | -0.7 | -2.0 | -0.0 | -0.6 | -1.8 | -2.2 | -2.1 | -0.3 | -1.8 | -2.2 | -2.1 |
| Peptide-Ethene.2.z-30      | -2.5 <sup>a</sup> | 3.7  | -0.1 | -0.0 | -1.2 | -2.4 | -0.4 | -1.2 | -2.1 | -2.5 | -2.4 | -0.9 | -2.1 | -2.4 | -2.4 |
| Peptide-Ethene.2.z+30      | -1.8 <sup>a</sup> | 4.4  | 0.2  | -0.1 | -0.4 | -1.7 | 0.5  | -0.3 | -1.4 | -1.7 | -1.6 | 0.1  | -1.3 | -1.6 | -1.6 |
| Pyridine-Ethene.1.y-30     | -3.7 <sup>a</sup> | 3.3  | 0.3  | -0.4 | -1.2 | -1.8 | -1.5 | -2.9 | -3.5 | -3.6 | -3.7 | -2.5 | -3.1 | -3.4 | -3.4 |
| Pyridine-Ethene.1.y+30     | -3.6 <sup>a</sup> | 3.3  | 0.4  | -0.3 | -1.2 | -1.7 | -1.4 | -2.8 | -3.4 | -3.6 | -3.6 | -2.4 | -3.1 | -3.3 | -3.3 |
| Pyridine-Ethene.1.z-30     | -3.5 <sup>a</sup> | 4.1  | 0.1  | -0.5 | -1.0 | -1.5 | -1.1 | -2.5 | -3.2 | -3.3 | -3.3 | -1.9 | -2.7 | -2.9 | -2.9 |
| Pyridine-Ethene.1.z+30     | -3.5 <sup>a</sup> | 4.1  | 0.1  | -0.5 | -1.0 | -1.5 | -1.1 | -2.5 | -3.2 | -3.3 | -3.3 | -1.9 | -2.8 | -2.9 | -2.9 |
| Pyridine-Ethene.2.y-30     | -3.4 <sup>a</sup> | 2.8  | 0.1  | -0.4 | -1.3 | -1.8 | -1.6 | -2.7 | -3.3 | -3.4 | -3.5 | -2.3 | -3.0 | -3.2 | -3.2 |
| Pyridine-Ethene.2.y+30     | -3.3 <sup>a</sup> | 2.8  | 0.1  | -0.4 | -1.3 | -1.8 | -1.6 | -2.7 | -3.2 | -3.4 | -3.4 | -2.3 | -3.0 | -3.2 | -3.2 |
| Pyridine-Ethene.2.z-30     | -3.4 <sup>a</sup> | 2.9  | 0.1  | -0.4 | -1.3 | -1.8 | -1.6 | -2.8 | -3.3 | -3.5 | -3.5 | -2.4 | -3.0 | -3.3 | -3.3 |
| Pyridine-Ethene.2.z+30     | -3.4 <sup>a</sup> | 2.9  | 0.1  | -0.4 | -1.3 | -1.8 | -1.6 | -2.8 | -3.3 | -3.5 | -3.5 | -2.4 | -3.0 | -3.3 | -3.3 |
| Pentane-AcOH.1.y-30        | -1.5 <sup>a</sup> | 2.8  | -0.1 | -1.0 | -0.5 | -2.0 | 0.2  | -0.4 | -1.5 | -1.9 | -1.8 | -0.0 | -1.4 | -1.7 | -1.7 |
| Pentane-AcOH.1.y+30        | -1.4 <sup>a</sup> | 3.0  | 0.0  | -0.0 | -0.6 | -1.7 | -0.0 | -0.3 | -1.2 | -1.5 | -1.5 | -0.2 | -1.3 | -1.6 | -1.5 |
| Pentane-AcOH.1.z-30        | -1.8 <sup>a</sup> | 3.9  | 0.0  | -0.5 | -0.5 | -2.2 | 0.2  | -0.1 | -1.4 | -1.8 | -1.8 | 0.1  | -1.5 | -1.9 | -1.8 |
| Pentane-AcOH.1.z+30        | -1.6 <sup>a</sup> | 3.3  | -0.1 | -0.8 | -0.4 | -2.1 | 0.3  | -0.3 | -1.4 | -1.9 | -1.8 | 0.0  | -1.5 | -1.8 | -1.8 |
| Pentane-AcOH.2.y-30        | -1.7 <sup>a</sup> | 3.9  | -0.1 | -1.2 | -0.6 | -2.2 | 0.3  | -0.4 | -1.8 | -2.2 | -2.1 | 0.0  | -1.7 | -2.0 | -1.9 |

... continued on next page ...

Table S29: . . . continued from previous page . . .

| Complex                        | Ref.              | MNDO | AMI  | PM3  | PM6  | PM7  | OM1  |      | OM2  |      | OM3  |      | OM3  |      | D3T  |
|--------------------------------|-------------------|------|------|------|------|------|------|------|------|------|------|------|------|------|------|
|                                |                   |      |      |      |      |      | OM1  | OM2  | D2   | D3   | D3T  | D2   | D3   | D3T  |      |
| Pentane-AcOH_2.y.+30           | -2.4 <sup>a</sup> | 5.7  | -0.3 | -0.4 | -1.2 | -2.4 | -0.1 | -0.6 | -2.1 | -2.4 | -0.3 | -2.4 | -2.1 | -2.5 | -2.4 |
| Pentane-AcOH_2.z.-30           | -2.3 <sup>a</sup> | 5.6  | -0.0 | -0.9 | -0.9 | -2.4 | 0.2  | -0.5 | -2.1 | -2.5 | 0.0  | -2.4 | -2.1 | -2.4 | -2.3 |
| Pentane-AcOH_2.z.+30           | -2.1 <sup>a</sup> | 4.6  | 0.0  | 0.3  | -0.8 | -2.1 | 0.0  | -0.3 | -1.4 | -1.9 | -0.1 | -1.8 | -1.6 | -2.0 | -1.9 |
| Pentane-AcNH2_1.y.-30          | -1.8 <sup>a</sup> | 3.1  | 0.1  | -0.2 | -0.5 | -2.1 | 0.0  | -0.3 | -1.3 | -1.7 | -0.1 | -1.6 | -1.4 | -1.7 | -1.7 |
| Pentane-AcNH2_1.y.+30          | -1.5 <sup>a</sup> | 2.4  | -0.1 | -0.8 | -0.4 | -1.9 | 0.3  | -0.5 | -1.4 | -1.7 | -0.1 | -1.6 | -1.3 | -1.5 | -1.5 |
| Pentane-AcNH2_1.z.-30          | -2.2 <sup>a</sup> | 4.3  | 0.1  | -0.9 | -0.3 | -2.5 | 0.5  | -0.2 | -1.7 | -2.2 | 0.2  | -2.1 | -1.6 | -2.0 | -2.0 |
| Pentane-AcNH2_1.z.+30          | -2.2 <sup>a</sup> | 4.5  | -0.2 | -0.5 | -0.9 | -2.8 | 0.1  | -0.5 | -1.8 | -2.3 | -0.2 | -2.2 | -1.9 | -2.3 | -2.2 |
| Pentane-AcNH2_2.y.-30          | -2.6 <sup>a</sup> | 6.4  | -0.2 | -0.3 | -1.1 | -2.9 | 0.3  | -0.7 | -2.3 | -2.7 | -0.1 | -2.6 | -2.3 | -2.6 | -2.5 |
| Pentane-AcNH2_2.y.+30          | -2.2 <sup>a</sup> | 4.9  | -0.2 | -1.2 | -0.8 | -2.6 | 0.5  | -0.6 | -2.1 | -2.5 | 0.0  | -2.4 | -1.9 | -2.2 | -2.1 |
| Pentane-AcNH2_2.z.-30          | -2.5 <sup>a</sup> | 4.6  | -0.0 | 0.3  | -0.7 | -2.2 | -0.0 | -0.3 | -1.5 | -2.0 | -0.1 | -1.9 | -1.6 | -2.0 | -1.9 |
| Pentane-AcNH2_2.z.+30          | -2.6 <sup>a</sup> | 6.4  | 0.1  | -1.0 | -1.0 | -3.1 | 0.3  | -0.5 | -2.4 | -2.9 | 0.1  | -2.8 | -2.4 | -2.9 | -2.8 |
| Benzene-AcOH_1.y.-30           | -2.9 <sup>a</sup> | 4.1  | 0.4  | 0.2  | -1.3 | -2.9 | -0.5 | -1.4 | -2.8 | -3.2 | -0.9 | -3.2 | -2.6 | -3.1 | -3.0 |
| Benzene-AcOH_1.y.+30           | -2.4 <sup>a</sup> | 3.1  | 0.1  | -0.5 | -1.1 | -3.1 | -0.1 | -1.0 | -2.3 | -2.7 | -0.6 | -2.7 | -2.1 | -2.6 | -2.5 |
| Benzene-AcOH_1.z.-30           | -2.9 <sup>a</sup> | 4.7  | 0.5  | 0.3  | -1.2 | -2.7 | -0.4 | -1.3 | -2.8 | -3.2 | -0.7 | -3.1 | -2.6 | -3.0 | -3.0 |
| Benzene-AcOH_1.z.+30           | -2.2 <sup>a</sup> | 2.7  | 0.2  | -0.4 | -1.0 | -3.0 | -0.2 | -0.9 | -2.1 | -2.5 | -0.5 | -2.5 | -2.0 | -2.4 | -2.3 |
| Benzene-AcOH_2.y.-30           | -2.4 <sup>a</sup> | 3.6  | 0.9  | 0.9  | -0.9 | -2.9 | -0.4 | -0.7 | -2.0 | -2.6 | -0.5 | -2.5 | -2.1 | -2.6 | -2.5 |
| Benzene-AcOH_2.y.+30           | -3.0 <sup>a</sup> | 5.1  | 0.5  | -0.2 | -1.4 | -3.3 | 0.1  | -1.2 | -2.8 | -3.2 | -0.4 | -3.2 | -2.5 | -2.9 | -2.9 |
| Benzene-AcOH_2.z.-30           | -2.8 <sup>a</sup> | 4.2  | 0.4  | -0.3 | -1.4 | -3.1 | -0.2 | -1.3 | -2.8 | -3.2 | -0.7 | -3.2 | -2.6 | -3.0 | -2.9 |
| Benzene-AcOH_2.z.+30           | -2.1 <sup>a</sup> | 3.3  | 0.9  | 0.5  | -0.8 | -2.7 | -0.3 | -0.5 | -1.8 | -2.3 | -0.3 | -2.2 | -1.9 | -2.4 | -2.3 |
| Pyridine-Pyridine_CH-N_1.y.-30 | -3.8 <sup>a</sup> | 4.7  | -0.3 | -0.1 | -2.4 | -3.5 | -1.2 | -2.3 | -3.4 | -3.6 | -1.6 | -3.6 | -3.0 | -3.2 | -3.2 |
| Pyridine-Pyridine_CH-N_1.y.+30 | -3.8 <sup>a</sup> | 4.7  | -0.3 | -0.1 | -2.4 | -3.5 | -1.2 | -2.3 | -3.4 | -3.6 | -1.6 | -3.6 | -3.0 | -3.2 | -3.2 |
| Pyridine-Pyridine_CH-N_1.z.-30 | -2.8 <sup>a</sup> | 2.6  | -0.0 | -0.2 | -1.7 | -2.7 | -0.9 | -1.8 | -2.5 | -2.8 | -1.4 | -2.8 | -2.3 | -2.5 | -2.6 |
| Pyridine-Pyridine_CH-N_1.z.+30 | -2.9 <sup>a</sup> | 3.4  | -0.5 | -0.6 | -1.8 | -2.8 | -0.8 | -1.8 | -2.6 | -2.8 | -1.2 | -2.8 | -2.3 | -2.4 | -2.5 |
| Pyridine-Pyridine_CH-N_2.y.-30 | -3.8 <sup>a</sup> | 4.9  | -0.2 | -0.0 | -2.4 | -3.5 | -1.1 | -2.3 | -3.4 | -3.6 | -1.6 | -3.6 | -3.0 | -3.2 | -3.2 |
| Pyridine-Pyridine_CH-N_2.y.+30 | -3.8 <sup>a</sup> | 4.9  | -0.2 | -0.0 | -2.4 | -3.5 | -1.1 | -2.3 | -3.4 | -3.6 | -1.6 | -3.6 | -3.0 | -3.2 | -3.2 |
| Pyridine-Pyridine_CH-N_2.z.-30 | -2.6 <sup>a</sup> | 2.9  | 0.2  | 0.0  | -1.4 | -2.5 | -0.6 | -1.6 | -2.3 | -2.6 | -1.2 | -2.6 | -2.1 | -2.3 | -2.4 |
| Pyridine-Pyridine_CH-N_2.z.+30 | -2.6 <sup>a</sup> | 3.8  | -0.5 | -0.6 | -1.7 | -2.6 | -0.5 | -1.6 | -2.4 | -2.6 | -0.9 | -2.7 | -2.1 | -2.2 | -2.2 |
| MeNH2-Pyridine_1.y.-30         | -3.3 <sup>a</sup> | 4.2  | 0.3  | 0.7  | -1.4 | -4.8 | -0.6 | -1.1 | -2.1 | -2.4 | -0.9 | -2.3 | -2.1 | -2.4 | -2.3 |
| MeNH2-Pyridine_1.y.+30         | -2.6 <sup>a</sup> | 4.9  | 0.5  | 0.5  | -1.1 | -2.9 | 0.1  | -0.5 | -2.0 | -2.3 | -0.1 | -2.2 | -1.9 | -2.2 | -2.2 |
| MeNH2-Pyridine_1.z.-30         | -3.5 <sup>a</sup> | 5.7  | 0.5  | 1.0  | -1.6 | -4.4 | -0.7 | -1.0 | -2.6 | -2.9 | -0.7 | -2.8 | -2.7 | -3.1 | -3.0 |
| MeNH2-Pyridine_1.z.+30         | -3.5 <sup>a</sup> | 4.9  | 0.1  | 1.2  | -1.5 | -3.8 | -0.7 | -1.0 | -2.3 | -2.6 | -0.7 | -2.5 | -2.4 | -2.6 | -2.6 |
| MeNH2-Pyridine_2.y.-30         | -3.9 <sup>a</sup> | 5.1  | 0.5  | 1.3  | -1.4 | -4.7 | -0.9 | -1.2 | -2.3 | -2.6 | -1.0 | -2.6 | -2.5 | -2.8 | -2.7 |
| MeNH2-Pyridine_2.y.+30         | -2.7 <sup>a</sup> | 4.7  | 0.3  | 0.1  | -1.3 | -3.5 | -0.1 | -0.7 | -2.2 | -2.5 | -0.3 | -2.5 | -2.2 | -2.5 | -2.5 |
| MeNH2-Pyridine_2.z.-30         | -2.6 <sup>a</sup> | 4.6  | -0.5 | -0.1 | -1.7 | -3.1 | -0.5 | -1.2 | -2.5 | -2.7 | -0.7 | -2.6 | -2.3 | -2.4 | -2.4 |
| MeNH2-Pyridine_2.z.+30         | -3.1 <sup>a</sup> | 6.5  | 1.2  | 1.5  | -0.7 | -3.3 | 0.2  | -0.3 | -1.9 | -2.2 | 0.0  | -2.1 | -2.0 | -2.3 | -2.3 |

a J.Rezac, K.E.Riley, and P.Hobza, J.Chem.Theory Comput. 7, 2427 (2011) ; 7, 3466 (2011).

Table S30: Benchmark Results for the JSCH-2005-CHNOF Data Set. Interaction Energies (kcal/mol)

| Complex                | Ref.               | MNDO | AM1   | PM3   | PM6   | PM7   | OM1   | OM2   |       | OM3   |       | D3T   | D3T   |
|------------------------|--------------------|------|-------|-------|-------|-------|-------|-------|-------|-------|-------|-------|-------|
|                        |                    |      |       |       |       |       |       | D2    | D3    | D2    | D3    |       |       |
| G...C WC(1)            | -32.1 <sup>a</sup> | 17.4 | -11.8 | -16.5 | -21.4 | -32.8 | -18.1 | -23.8 | -26.3 | -26.7 | -22.9 | -26.7 | -26.7 |
| mG...mC WC             | -31.6 <sup>a</sup> | 19.6 | -10.7 | -17.1 | -21.3 | -32.9 | -18.0 | -24.2 | -26.9 | -27.3 | -23.4 | -27.3 | -27.3 |
| A...T WC               | -16.9 <sup>a</sup> | 15.4 | -4.3  | -6.8  | -9.1  | -17.3 | -6.6  | -11.1 | -13.2 | -13.5 | -11.3 | -13.6 | -14.5 |
| mA...mT H              | -18.2 <sup>a</sup> | 15.9 | -3.4  | -8.1  | -8.9  | -16.3 | -7.2  | -11.8 | -13.9 | -14.4 | -12.6 | -14.4 | -15.9 |
| 8-oxoG...C WC          | -33.3 <sup>a</sup> | 18.8 | -11.8 | -19.0 | -22.6 | -33.3 | -19.4 | -26.0 | -28.6 | -29.0 | -25.3 | -29.1 | -29.2 |
| L...C WC               | -24.9 <sup>a</sup> | 14.4 | -8.4  | -13.9 | -15.6 | -23.8 | -14.1 | -19.5 | -21.7 | -22.1 | -19.4 | -22.1 | -22.8 |
| G...U wobble           | -19.1 <sup>a</sup> | 21.9 | -2.5  | -8.2  | -11.0 | -18.6 | -8.1  | -14.2 | -16.1 | -16.4 | -12.5 | -16.5 | -15.4 |
| C...C H+               | -51.4 <sup>a</sup> | 6.0  | -24.6 | -36.0 | -36.5 | -47.2 | -38.0 | -44.9 | -47.7 | -48.0 | -45.7 | -48.1 | -49.7 |
| U...U "calcutta"       | -10.3 <sup>a</sup> | 13.0 | -3.0  | -3.1  | -7.0  | -8.8  | -4.3  | -8.4  | -9.7  | -10.0 | -7.1  | -10.1 | -9.2  |
| U...U pl               | -13.7 <sup>a</sup> | 19.3 | -1.3  | -5.3  | -7.9  | -12.4 | -4.7  | -10.1 | -11.6 | -11.9 | -8.6  | -10.5 | -11.1 |
| 2-aminoA...T           | -19.5 <sup>a</sup> | 25.2 | -5.5  | -7.8  | -11.9 | -24.0 | -7.5  | -14.2 | -16.9 | -17.2 | -13.8 | -17.3 | -17.8 |
| 2-aminoA...T pl        | -19.7 <sup>a</sup> | 23.8 | -5.8  | -8.3  | -12.4 | -22.9 | -7.9  | -14.3 | -16.9 | -17.3 | -13.6 | -17.3 | -17.5 |
| A...difluorotoluene WC | -5.2 <sup>a</sup>  | 7.8  | -1.0  | -0.6  | -0.2  | -1.5  | -1.6  | -3.0  | -4.3  | -4.6  | -2.2  | -4.7  | -4.2  |
| A...C                  | -17.6 <sup>a</sup> | 12.4 | -4.0  | -9.0  | -9.5  | -20.5 | -7.8  | -11.3 | -13.4 | -13.8 | -12.6 | -13.8 | -15.8 |
| G...G H-bond           | -21.3 <sup>a</sup> | 8.6  | -8.4  | -9.2  | -13.1 | -22.9 | -13.0 | -15.3 | -17.4 | -17.8 | -15.6 | -17.8 | -18.8 |
| G...A1                 | -19.4 <sup>a</sup> | 19.0 | -4.2  | -8.6  | -10.6 | -22.9 | -8.1  | -12.9 | -15.4 | -15.8 | -12.8 | -15.8 | -16.5 |
| G...A1 pl              | -18.9 <sup>a</sup> | 17.4 | -4.3  | -9.2  | -11.3 | -23.5 | -8.4  | -12.8 | -15.2 | -15.5 | -12.5 | -15.6 | -16.0 |
| G...A2                 | -14.4 <sup>a</sup> | 11.4 | -1.2  | -4.1  | -6.3  | -18.7 | -4.9  | -7.5  | -9.4  | -10.0 | -8.4  | -10.7 | -11.5 |
| G...A2pl               | -12.8 <sup>a</sup> | 12.2 | -0.8  | -4.7  | -5.7  | -17.0 | -4.8  | -7.3  | -9.3  | -9.8  | -8.4  | -10.8 | -11.5 |
| G...A3                 | -18.8 <sup>a</sup> | 17.1 | -3.9  | -8.5  | -10.2 | -22.1 | -8.1  | -12.1 | -14.5 | -14.9 | -12.4 | -15.3 | -16.0 |
| G...A4                 | -13.5 <sup>a</sup> | 13.5 | -1.3  | -4.4  | -6.1  | -19.1 | -4.9  | -7.9  | -9.9  | -10.4 | -9.0  | -10.4 | -12.1 |
| A...A1                 | -14.5 <sup>a</sup> | 12.8 | -1.9  | -6.1  | -7.0  | -19.8 | -5.4  | -8.6  | -10.5 | -10.9 | -9.8  | -10.9 | -12.8 |
| A...A2                 | -13.7 <sup>a</sup> | 12.5 | -0.9  | -5.5  | -6.0  | -18.3 | -4.6  | -7.4  | -9.3  | -9.8  | -8.7  | -11.0 | -11.7 |
| A...A3                 | -12.2 <sup>a</sup> | 12.5 | 0.3   | -3.7  | -4.6  | -16.1 | -3.5  | -5.9  | -7.8  | -8.3  | -6.9  | -8.4  | -9.9  |
| 8-oxoG...G             | -22.8 <sup>a</sup> | 23.3 | -3.4  | -9.6  | -13.5 | -21.4 | -10.6 | -17.4 | -19.5 | -19.8 | -15.7 | -19.9 | -18.9 |
| mA...mT WC(AT)         | -16.4 <sup>a</sup> | 15.4 | -4.5  | -6.4  | -8.9  | -17.1 | -6.7  | -11.0 | -13.1 | -13.5 | -11.4 | -14.1 | -14.7 |
| mG...mC WC*            | -35.8 <sup>a</sup> | 18.4 | -12.8 | -20.8 | -23.8 | -35.5 | -21.2 | -27.5 | -30.2 | -30.6 | -26.5 | -30.6 | -30.5 |
| mA...mT WC(AC)         | -18.4 <sup>a</sup> | 13.0 | -6.1  | -6.8  | -9.7  | -17.9 | -8.2  | -12.1 | -14.2 | -14.6 | -12.6 | -14.7 | -15.9 |
| G...A HB               | -11.3 <sup>a</sup> | 16.2 | 0.3   | -5.4  | -4.9  | -18.3 | -4.0  | -7.6  | -10.0 | -10.5 | -9.0  | -10.5 | -12.6 |
| C...G WC               | -30.7 <sup>a</sup> | 21.6 | -9.3  | -18.8 | -21.9 | -33.1 | -19.6 | -26.6 | -29.3 | -29.6 | -25.8 | -29.7 | -29.8 |
| G...C WC(2)            | -31.4 <sup>a</sup> | 21.4 | -9.1  | -18.6 | -21.5 | -32.2 | -19.3 | -26.4 | -29.0 | -29.4 | -25.5 | -29.5 | -29.5 |
| GG0/3.36CGis036        | -3.7 <sup>a</sup>  | -0.5 | -1.2  | -1.8  | -2.4  | -5.9  | -1.9  | -1.9  | -2.7  | -3.2  | -2.0  | -3.2  | -3.3  |
| GG0/3.36GGis036        | -4.8 <sup>a</sup>  | -2.8 | -3.1  | -3.7  | -4.3  | -6.6  | -4.1  | -3.9  | -4.3  | -4.6  | -3.9  | -4.4  | -4.6  |
| AA20/3.05ATis2005      | -2.3 <sup>a</sup>  | 1.8  | -1.4  | -1.0  | -1.9  | -4.7  | -1.0  | -1.1  | -1.9  | -2.2  | -1.0  | -2.0  | -2.3  |
| AA20/3.05TAis2005      | -2.2 <sup>a</sup>  | 3.4  | -0.3  | 0.3   | -1.6  | -3.8  | -0.4  | -1.0  | -2.0  | -2.4  | -0.6  | -2.4  | -2.2  |
| GC0/3.25C//Cis         | 3.1 <sup>a</sup>   | 2.8  | 2.9   | 2.9   | 3.3   | 2.2   | 3.8   | 3.8   | 3.7   | 3.5   | 3.8   | 3.6   | 3.5   |
| GC0/3.25G//Gis         | 1.9 <sup>a</sup>   | 5.7  | 4.4   | 5.3   | 4.0   | -3.1  | 5.3   | 5.0   | 3.8   | 3.2   | 5.3   | 3.9   | 3.3   |
| CG0/3.19G//Gis         | -3.9 <sup>a</sup>  | 2.5  | 2.1   | 2.5   | 2.4   | 0.1   | 2.4   | 2.2   | 1.8   | 1.6   | 2.2   | 1.8   | 1.6   |
| CG0/3.19C//Cis         | 1.2 <sup>a</sup>   | 8.5  | 1.1   | 4.5   | -1.8  | -9.3  | 0.8   | -0.1  | -3.2  | -4.1  | 0.7   | -3.2  | -3.8  |
| GA10/3.15A//Cis        | -0.3 <sup>a</sup>  | 2.1  | 1.4   | 1.4   | 0.9   | -0.8  | 1.3   | 1.2   | 0.6   | 0.2   | 1.3   | 0.2   | 0.1   |
| GA10/3.15T//Gis        | 0.6 <sup>a</sup>   | 1.8  | 1.5   | 1.5   | 1.2   | -1.7  | 2.0   | 2.0   | 1.5   | 1.2   | 2.1   | 1.6   | 1.3   |
| AG08/3.19T//Gis        | -0.5 <sup>a</sup>  | 4.2  | 1.0   | 2.0   | 0.5   | -3.6  | 1.4   | 1.0   | -0.2  | -0.7  | 1.3   | -0.2  | -0.6  |
| AG08/3.19A//Cis        | -0.2 <sup>a</sup>  | 2.6  | 1.3   | 2.0   | 1.2   | -1.6  | 1.3   | 0.9   | 0.3   | -0.1  | 1.0   | 0.2   | -0.1  |

... continued on next page ...

Table S30: ... continued from previous page ...

| Complex           | Ref.               | MNDO | AMI  | PM3  | PM6   | PM7   | OM1   |       | OM2   |       | OM3   |       | OM3   |       | D3T |
|-------------------|--------------------|------|------|------|-------|-------|-------|-------|-------|-------|-------|-------|-------|-------|-----|
|                   |                    |      |      |      |       |       | D2    | D3    | D2    | D3    | D2    | D3    | D2    | D3    |     |
| TG03.19A//Gis     | -4.2 <sup>a</sup>  | 5.4  | 0.6  | 1.8  | -2.1  | -7.5  | -0.2  | -1.2  | -3.6  | -4.4  | -4.3  | -0.8  | -3.8  | -4.4  |     |
| TG03.19T//Cis     | -1.1 <sup>a</sup>  | -0.4 | -0.5 | -0.7 | -0.9  | -2.6  | -0.7  | -0.6  | -0.8  | -1.0  | -1.0  | -0.6  | -0.9  | -1.1  |     |
| GT10/3.15T//Cis   | 0.3 <sup>a</sup>   | 0.6  | 0.5  | 0.5  | 0.3   | -1.3  | 0.8   | 1.0   | 0.8   | 0.7   | 0.7   | 0.9   | 0.7   | 0.6   |     |
| GT10/3.15A//Gis   | -4.1 <sup>a</sup>  | 1.3  | -1.5 | -1.8 | -3.1  | -7.4  | -2.0  | -1.7  | -3.0  | -3.6  | -3.5  | -1.8  | -3.4  | -3.8  |     |
| AT10/3.26T//Tis   | 0.9 <sup>a</sup>   | 1.3  | 1.1  | 1.2  | 0.9   | -1.1  | 1.6   | 1.7   | 1.4   | 1.1   | 1.1   | 1.7   | 1.3   | 1.1   |     |
| AT10/3.26A//Ais   | -0.9 <sup>a</sup>  | 2.8  | 0.9  | 1.7  | 0.5   | -3.5  | 0.6   | 0.4   | -0.5  | -0.9  | -0.9  | 0.5   | -0.7  | -1.0  |     |
| TA08/3.16A//Ais   | -1.6 <sup>a</sup>  | 7.2  | 2.3  | 3.6  | 0.5   | -2.5  | 1.1   | 0.9   | -1.3  | -1.8  | -1.7  | 1.1   | -1.5  | -2.1  |     |
| TA08/3.16T//Tis   | 0.7 <sup>a</sup>   | 1.0  | 1.0  | 0.9  | 0.9   | -0.3  | 1.3   | 1.4   | 1.2   | 1.1   | 1.0   | 1.5   | 1.2   | 1.1   |     |
| AA0/3.24A//Tis    | -1.7 <sup>a</sup>  | 0.3  | -0.1 | -0.3 | -0.8  | -3.2  | -0.5  | -0.4  | -1.0  | -1.4  | -1.3  | -0.4  | -1.1  | -1.4  |     |
| AA0/3.24T//Ais    | -1.3 <sup>a</sup>  | 0.2  | -0.2 | -0.5 | -0.8  | -3.4  | -0.3  | -0.3  | -0.7  | -1.1  | -1.1  | -0.3  | -0.9  | -1.2  |     |
| A...A             | -0.7 <sup>a</sup>  | 3.4  | 0.8  | 1.9  | 0.4   | -3.2  | 0.5   | 0.6   | -0.5  | -1.0  | -1.0  | 0.6   | -0.8  | -1.3  |     |
| T...T             | 1.0 <sup>a</sup>   | 1.5  | 1.3  | 1.3  | 1.2   | -0.7  | 1.8   | 1.9   | 1.6   | 1.3   | 1.3   | 1.9   | 1.5   | 1.3   |     |
| G...G interstrand | -4.5 <sup>a</sup>  | 6.9  | 1.3  | 3.8  | -1.8  | -8.5  | 0.3   | -0.2  | -3.4  | -4.6  | -4.3  | 0.4   | -3.7  | -4.4  |     |
| C...C             | 1.4 <sup>a</sup>   | 4.0  | 2.6  | 3.6  | 2.9   | 0.5   | 2.7   | 2.4   | 1.9   | 1.6   | 1.5   | 2.4   | 1.7   | 1.4   |     |
| A...G             | -4.8 <sup>a</sup>  | 0.2  | -1.9 | -2.5 | -3.5  | -8.1  | -2.2  | -2.3  | -3.4  | -4.0  | -4.0  | -2.2  | -3.6  | -4.1  |     |
| T...C             | -0.1 <sup>a</sup>  | 0.3  | 0.3  | 0.2  | 0.0   | -1.4  | 0.4   | 0.7   | 0.5   | 0.3   | 0.3   | 0.7   | 0.4   | 0.3   |     |
| C...A             | -3.0 <sup>a</sup>  | 5.1  | -0.2 | 0.7  | -0.9  | -2.8  | 1.0   | 0.2   | -0.9  | -1.2  | -1.2  | 0.5   | -0.8  | -1.1  |     |
| G...G 9           | -5.2 <sup>a</sup>  | -1.8 | -3.6 | -3.4 | -4.8  | -8.5  | -4.5  | -4.2  | -5.0  | -5.4  | -5.3  | -4.1  | -5.1  | -5.4  |     |
| G...G 10          | 0.8 <sup>a</sup>   | 7.8  | 4.0  | 6.1  | 3.0   | -3.9  | 4.6   | 4.3   | 2.5   | 1.8   | 1.8   | 4.7   | 2.5   | 1.9   |     |
| C...C 11          | 3.1 <sup>a</sup>   | 3.0  | 3.1  | 3.0  | 3.6   | 1.9   | 3.9   | 3.8   | 3.7   | 3.5   | 3.5   | 3.8   | 3.6   | 3.5   |     |
| G...C S           | -19.0 <sup>a</sup> | 16.2 | -5.9 | 2.3  | -13.1 | -20.7 | -10.6 | -11.7 | -17.5 | -18.1 | -17.8 | -10.8 | -17.7 | -18.4 |     |
| mG...mC S         | -20.4 <sup>a</sup> | 24.7 | -3.2 | 6.5  | -12.0 | -20.7 | -9.8  | -11.2 | -19.0 | -19.5 | -19.1 | -10.0 | -19.5 | -20.1 |     |
| A...T S1          | -12.3 <sup>a</sup> | 18.7 | 2.9  | 7.4  | -4.9  | -11.4 | -2.1  | -4.0  | -10.3 | -10.9 | -10.6 | -3.3  | -11.0 | -11.5 |     |
| mA...mT S         | -14.6 <sup>a</sup> | 32.0 | 4.8  | 11.5 | -5.1  | -12.6 | -0.7  | -4.3  | -12.9 | -13.2 | -12.8 | -2.9  | -13.4 | -13.6 |     |
| CC 1              | 2.5 <sup>a</sup>   | 13.8 | 8.6  | 10.1 | 5.2   | -0.2  | 7.2   | 6.7   | 3.0   | 2.0   | 2.2   | 6.8   | 2.4   | 1.3   |     |
| CC 2              | -3.9 <sup>a</sup>  | 11.7 | 5.3  | 6.3  | -0.1  | -5.1  | 2.3   | 1.9   | -2.1  | -3.0  | -2.8  | 1.9   | -3.0  | -3.8  |     |
| CC 3              | -8.9 <sup>a</sup>  | 8.2  | 1.7  | 2.3  | -4.9  | -9.6  | -2.9  | -3.1  | -7.1  | -8.0  | -7.8  | -3.0  | -7.9  | -8.8  |     |
| CC 4              | -9.9 <sup>a</sup>  | 7.3  | 1.1  | 2.7  | -5.2  | -10.0 | -4.1  | -4.2  | -8.1  | -9.1  | -8.8  | -3.8  | -8.7  | -9.5  |     |
| CC 5              | 0.3 <sup>a</sup>   | 14.3 | 8.3  | 10.0 | 4.2   | -0.6  | 6.1   | 5.8   | 1.9   | 1.0   | 1.2   | 5.9   | 1.2   | 0.4   |     |
| CC 6              | 0.6 <sup>a</sup>   | 15.0 | 8.6  | 10.6 | 4.5   | -0.4  | 6.7   | 6.1   | 2.2   | 1.3   | 1.5   | 6.4   | 1.6   | 0.8   |     |
| CC 7              | -1.0 <sup>a</sup>  | 8.0  | 4.8  | 4.6  | 1.8   | -2.4  | 3.3   | 3.3   | 0.9   | 0.1   | 0.2   | 3.1   | 0.2   | -0.7  |     |
| CC 8              | -9.1 <sup>a</sup>  | 4.8  | 0.7  | 0.8  | -5.0  | -9.2  | -4.1  | -3.2  | -6.6  | -7.5  | -7.3  | -3.3  | -7.4  | -8.2  |     |
| CC 9              | -9.1 <sup>a</sup>  | 8.2  | 1.5  | 3.4  | -4.7  | -9.5  | -3.5  | -4.4  | -8.3  | -9.3  | -9.1  | -3.8  | -8.6  | -9.5  |     |
| CC 10             | -8.3 <sup>a</sup>  | 7.3  | 1.2  | 3.2  | -4.1  | -8.9  | -3.3  | -3.6  | -7.4  | -8.3  | -8.1  | -3.2  | -7.9  | -8.7  |     |
| CC 11             | -9.4 <sup>a</sup>  | 6.4  | 0.6  | 2.0  | -5.7  | -10.6 | -4.5  | -4.6  | -8.3  | -9.2  | -9.0  | -4.3  | -8.8  | -9.6  |     |
| CC 12             | -7.4 <sup>a</sup>  | 0.9  | -0.8 | -1.7 | -5.1  | -8.0  | -4.7  | -3.1  | -5.1  | -5.8  | -5.7  | -3.9  | -6.3  | -7.0  |     |
| CC 13             | -8.8 <sup>a</sup>  | 6.1  | 0.7  | 2.4  | -3.8  | -8.2  | -3.1  | -3.5  | -6.8  | -7.8  | -7.6  | -3.0  | -7.1  | -7.9  |     |
| CC 14             | -9.1 <sup>a</sup>  | 8.0  | 1.3  | 3.4  | -4.7  | -9.3  | -3.7  | -4.0  | -8.1  | -9.0  | -8.8  | -3.8  | -8.8  | -9.6  |     |
| A...A S           | -8.6 <sup>a</sup>  | 10.1 | 3.5  | 4.5  | -3.1  | -10.6 | -0.8  | -0.8  | -5.5  | -6.4  | -6.1  | -0.7  | -6.5  | -7.1  |     |
| GGst              | -12.7 <sup>a</sup> | 8.9  | 1.0  | 2.1  | -7.0  | -14.8 | -4.4  | -4.4  | -9.7  | -10.7 | -10.3 | -4.3  | -10.7 | -11.4 |     |
| ACst              | -10.2 <sup>a</sup> | 8.6  | 1.6  | 2.7  | -4.9  | -10.7 | -2.8  | -3.4  | -7.8  | -8.7  | -8.4  | -3.0  | -8.4  | -9.1  |     |
| GAst              | -11.4 <sup>a</sup> | 9.5  | 2.5  | 3.2  | -4.9  | -12.7 | -2.6  | -2.8  | -7.9  | -8.8  | -8.4  | -2.7  | -8.8  | -9.5  |     |
| CCst              | -10.0 <sup>a</sup> | 7.4  | 0.8  | 2.6  | -5.6  | -10.4 | -4.2  | -5.0  | -8.9  | -9.8  | -9.6  | -4.4  | -9.1  | -9.9  |     |
| AUst              | -9.8 <sup>a</sup>  | 9.6  | 2.1  | 3.5  | -4.7  | -10.1 | -2.3  | -3.3  | -7.8  | -8.7  | -8.4  | -3.0  | -8.4  | -9.1  |     |
| GCst              | -10.6 <sup>a</sup> | 7.1  | -0.3 | 1.1  | -7.0  | -12.3 | -4.5  | -5.2  | -9.4  | -10.4 | -10.1 | -4.6  | -9.8  | -10.6 |     |

... continued on next page ...



Table S30: ... continued from previous page ...

| Complex          | Ref.                | MNDO  | AMI   | PM3    | PM6   | PM7    | OM1   |       | OM2    |        | OM3    |       | D3T    |        |        |
|------------------|---------------------|-------|-------|--------|-------|--------|-------|-------|--------|--------|--------|-------|--------|--------|--------|
|                  |                     |       |       |        |       |        | D2    | D3    | D2     | D3     | D2     | D3    |        | D2     | D3     |
| CUst             | -10.4 <sup>a</sup>  | 6.6   | 0.2   | 1.0    | -6.7  | -10.8  | -4.5  | -5.1  | -8.9   | -9.8   | -9.6   | -5.1  | -9.7   | -10.7  | -10.5  |
| UUst             | -7.5 <sup>a</sup>   | 7.9   | 1.9   | 2.5    | -3.9  | -7.9   | -2.1  | -3.3  | -6.8   | -7.6   | -7.4   | -3.2  | -7.4   | -8.4   | -8.2   |
| GUst             | -12.1 <sup>a</sup>  | 8.2   | 0.2   | 1.5    | -7.5  | -12.8  | -4.7  | -5.7  | -10.2  | -11.1  | -10.9  | -5.5  | -11.1  | -12.1  | -11.8  |
| GG0/3.36GGs036   | -3.5 <sup>a</sup>   | 9.6   | 5.6   | 6.0    | 2.2   | -2.1   | 3.7   | 3.7   | 0.8    | -0.1   | 0.0    | 3.4   | 0.2    | -1.1   | -1.0   |
| GG0/3.36CCs036   | -1.6 <sup>a</sup>   | 13.0  | 7.4   | 8.7    | 1.7   | -5.9   | 4.5   | 4.6   | 0.0    | -1.0   | -0.7   | 4.6   | -1.0   | -2.0   | -1.7   |
| AA20/3.05AAs2005 | -6.1 <sup>a</sup>   | 13.4  | 5.3   | 7.6    | -0.6  | -8.0   | 1.5   | 1.3   | -3.7   | -4.5   | -4.2   | 1.3   | -4.8   | -5.7   | -5.4   |
| AA20/3.05TTs2005 | -4.2 <sup>a</sup>   | 12.3  | 4.9   | 6.1    | 0.1   | -4.8   | 2.0   | 1.7   | -2.4   | -3.4   | -3.1   | 2.0   | -3.0   | -4.1   | -3.8   |
| GC0/3.25G//Cs    | -10.8 <sup>a</sup>  | 9.2   | 1.0   | 1.5    | -6.8  | -12.5  | -4.2  | -4.0  | -9.0   | -9.8   | -9.5   | -4.0  | -10.0  | -11.0  | -10.7  |
| CG0/3.19G//Cs    | -7.9 <sup>a</sup>   | 4.7   | 1.2   | 0.5    | -4.1  | -7.2   | -3.6  | -1.8  | -6.8   | -5.5   | -5.3   | -2.7  | -6.4   | -7.1   | -7.0   |
| GA10/3.15A//Gs   | -9.1 <sup>a</sup>   | 12.9  | 3.4   | 5.1    | -4.1  | -11.8  | -1.0  | -1.2  | -4.8   | -7.6   | -7.3   | -1.1  | -7.9   | -8.8   | -8.5   |
| GA10/3.15T//Cs   | -4.7 <sup>a</sup>   | 9.2   | 3.4   | 4.5    | -1.1  | -5.5   | 0.7   | 0.6   | -2.8   | -3.8   | -3.6   | 0.6   | -3.6   | -4.6   | -4.4   |
| AG08/3.19A//Gs   | -7.6 <sup>a</sup>   | 7.8   | 3.4   | 2.9    | -2.5  | -8.6   | -0.6  | 0.3   | -3.7   | -4.7   | -4.4   | -0.1  | -5.1   | -6.0   | -5.7   |
| AG08/3.19T//Cs   | -6.1 <sup>a</sup>   | 6.5   | 1.9   | 0.9    | -2.6  | -6.8   | -1.0  | -0.7  | -3.9   | -4.9   | -4.6   | -1.0  | -4.9   | -5.9   | -5.6   |
| TG03.19T//Gs     | -5.7 <sup>a</sup>   | 7.3   | 2.7   | 2.9    | -1.9  | -5.9   | -0.7  | -0.0  | -3.1   | -3.8   | -3.7   | -0.4  | -4.2   | -4.9   | -4.8   |
| TG03.19A//Cs     | -5.0 <sup>a</sup>   | 9.3   | 3.8   | 4.9    | -0.7  | -5.3   | -0.1  | 1.3   | -2.2   | -2.9   | -2.7   | 0.6   | -3.7   | -4.5   | -4.3   |
| GT10/3.15T//Gs   | -5.0 <sup>a</sup>   | 15.2  | 5.6   | 7.0    | -0.6  | -6.7   | 2.6   | 1.7   | -3.3   | -4.2   | -3.9   | 2.3   | -3.8   | -4.8   | -4.5   |
| GT10/3.15A//Cs   | -5.4 <sup>a</sup>   | 10.8  | 4.6   | 6.0    | -1.1  | -7.5   | 1.2   | 0.9   | -3.3   | -4.2   | -4.0   | 1.0   | -4.2   | -5.1   | -4.9   |
| AT10/3.26A//Ts   | -6.6 <sup>a</sup>   | 11.3  | 3.9   | 4.3    | -2.1  | -8.4   | 0.9   | -0.0  | -4.4   | -5.4   | -5.1   | 0.3   | -5.1   | -6.1   | -5.8   |
| TA08/3.16A//Ts   | -6.1 <sup>a</sup>   | 22.4  | 7.9   | 12.2   | 0.9   | -5.0   | 3.1   | 1.4   | -4.7   | -5.2   | -4.9   | 2.2   | -5.3   | -6.1   | -5.8   |
| AA0/3.24A//As    | -6.2 <sup>a</sup>   | 12.3  | 4.9   | 6.6    | -0.9  | -7.7   | 1.1   | 1.1   | -3.7   | -4.5   | -4.2   | 1.0   | -4.8   | -5.6   | -5.4   |
| AA0/3.24T//Ts    | -3.9 <sup>a</sup>   | 14.7  | 5.1   | 6.0    | 0.1   | -4.3   | 2.2   | 1.3   | -3.0   | -3.8   | -3.6   | 1.8   | -3.5   | -4.4   | -4.2   |
| A...T S2         | -8.1 <sup>a</sup>   | 12.6  | 4.7   | 5.2    | -1.9  | -9.2   | 1.2   | 0.5   | -4.7   | -6.0   | -5.5   | 0.8   | -5.6   | -6.8   | -6.4   |
| G...C S1         | -7.9 <sup>a</sup>   | 0.8   | 0.0   | -2.1   | -3.7  | -7.4   | -3.6  | -1.7  | -4.1   | -5.1   | -4.9   | -2.6  | -5.5   | -6.4   | -6.2   |
| A...C S          | -6.7 <sup>a</sup>   | 9.9   | 4.5   | 5.2    | -1.0  | -8.9   | 0.9   | 1.4   | -3.1   | -4.4   | -4.0   | 1.2   | -4.2   | -5.5   | -5.1   |
| T...G S          | -6.2 <sup>a</sup>   | 10.8  | 4.5   | 4.9    | -0.7  | -8.5   | 1.9   | 1.7   | -2.9   | -4.4   | -3.9   | 2.0   | -3.6   | -5.0   | -4.6   |
| G...C S2         | -7.7 <sup>a</sup>   | 11.0  | 2.8   | 4.9    | -2.5  | -8.3   | 1.0   | -2.3  | -6.6   | -7.5   | -7.2   | -1.8  | -7.0   | -8.0   | -7.7   |
| A...G S          | -6.5 <sup>a</sup>   | 12.6  | 3.3   | 7.4    | -1.6  | -8.8   | -0.5  | -0.4  | -5.4   | -6.3   | -6.0   | -0.3  | -6.4   | -7.4   | -7.0   |
| C...G S          | -12.4 <sup>a</sup>  | 6.4   | 0.6   | 0.1    | -6.6  | -11.8  | -4.1  | -3.6  | -7.9   | -8.9   | -8.6   | -3.8  | -9.0   | -10.0  | -9.8   |
| G...C S3         | -11.6 <sup>a</sup>  | 6.0   | -0.6  | -0.3   | -6.9  | -12.4  | -4.4  | -4.3  | -8.3   | -9.3   | -9.1   | -4.1  | -9.1   | -10.2  | -9.9   |
| F30-K46          | -3.1 <sup>a</sup>   | 2.7   | -0.3  | -1.1   | -1.0  | -3.9   | -0.4  | -1.0  | -2.4   | -3.1   | -3.0   | -0.6  | -2.4   | -3.0   | -2.9   |
| F30-L33          | -5.0 <sup>a</sup>   | 11.1  | -0.5  | 0.0    | -2.0  | -5.9   | -0.1  | -0.9  | -4.1   | -4.9   | -4.7   | -0.2  | -4.3   | -5.0   | -4.7   |
| F30-Y13          | -3.9 <sup>a</sup>   | 4.0   | -0.2  | -1.3   | -1.3  | -5.8   | -0.5  | -1.0  | -3.1   | -4.0   | -3.9   | -0.6  | -3.2   | -4.0   | -3.9   |
| F30-F49          | -3.3 <sup>a</sup>   | 3.4   | 0.3   | 0.5    | -0.8  | -3.8   | 0.1   | -0.7  | -2.3   | -3.1   | -3.0   | -0.2  | -2.3   | -3.0   | -2.9   |
| F30-Y4           | -7.0 <sup>a</sup>   | 6.9   | 2.4   | 1.0    | -0.6  | -7.8   | 0.6   | 0.5   | -3.2   | -4.6   | -4.3   | 0.7   | -3.8   | -5.1   | -4.8   |
| F49-K46          | -4.8 <sup>a</sup>   | 11.0  | -1.5  | 0.8    | -2.8  | -6.9   | -0.1  | -2.0  | -4.3   | -5.1   | -4.9   | -1.0  | -3.9   | -4.6   | -4.5   |
| F49-V5           | -6.7 <sup>a</sup>   | 15.3  | -1.2  | 0.1    | -4.9  | -9.3   | -1.1  | -4.0  | -7.7   | -8.7   | -8.4   | -2.4  | -7.0   | -7.9   | -7.7   |
| F49-W37          | -2.5 <sup>a</sup>   | 2.7   | 0.3   | -0.5   | -0.5  | -2.6   | 0.1   | -0.3  | -1.5   | -2.1   | -2.0   | -0.0  | -1.5   | -2.0   | -2.0   |
| F49-Y4           | -3.1 <sup>a</sup>   | 8.3   | 0.3   | 0.3    | 0.4   | -4.8   | 2.4   | 0.0   | -2.9   | -4.0   | -3.9   | 1.2   | -2.5   | -3.4   | -3.3   |
| F49-PB(Y4-V5)    | -2.8 <sup>a</sup>   | 3.3   | 0.5   | -0.0   | -0.1  | -3.3   | 0.3   | -0.4  | -1.9   | -2.8   | -2.7   | -0.0  | -1.9   | -2.6   | -2.5   |
| F49-PB(V5-C6)    | -8.2 <sup>a</sup>   | 11.5  | -0.7  | 0.1    | -5.2  | -9.1   | -2.6  | -4.4  | -7.8   | -8.7   | -8.6   | -3.5  | -7.7   | -8.7   | -8.4   |
| E47-K6(HU5)      | -80.7 <sup>a</sup>  | -53.0 | -69.8 | -68.1  | -70.8 | -76.3  | -67.5 | -71.4 | -74.1  | -74.9  | -74.7  | -69.7 | -73.0  | -73.8  | -73.6  |
| E49-K6(1BQ9)     | -113.3 <sup>a</sup> | -81.8 | -99.8 | -101.4 | -98.9 | -106.2 | -98.2 | -98.5 | -101.1 | -101.8 | -101.7 | -97.3 | -100.4 | -101.2 | -101.1 |
| E54-K2(1SMM)     | -88.3 <sup>a</sup>  | -81.3 | -86.7 | -87.0  | -87.1 | -90.8  | -87.0 | -85.8 | -86.8  | -87.3  | -87.2  | -85.2 | -86.4  | -86.9  | -86.9  |
| E50-K30(1BRF)    | -60.4 <sup>a</sup>  | -58.6 | -58.2 | -58.8  | -59.0 | -62.2  | -58.9 | -58.5 | -58.7  | -58.8  | -58.8  | -58.5 | -58.6  | -58.7  | -58.7  |
| E50-K52(1BRF)    | -97.1 <sup>a</sup>  | -70.5 | -84.5 | -83.4  | -86.3 | -92.8  | -83.8 | -84.0 | -86.9  | -87.7  | -87.5  | -83.3 | -86.8  | -87.6  | -87.4  |

... continued on next page ...

Table S30: ... continued from previous page ...

| Complex      | Ref.               | MNDO  | AMI   | PM3   | PM6   | PM7   | OM1   |       | OM2   |       | OM3   |       | OM3   |       |
|--------------|--------------------|-------|-------|-------|-------|-------|-------|-------|-------|-------|-------|-------|-------|-------|
|              |                    |       |       |       |       |       | D2    | D3    | D2    | D3    | D2    | D3    | D2    | D3    |
| E49-K6(1BRF) | -74.2 <sup>a</sup> | -48.9 | -63.8 | -67.1 | -64.3 | -70.1 | -61.0 | -64.8 | -67.6 | -68.1 | -68.0 | -63.8 | -67.0 | -67.8 |

<sup>a</sup> P.Jurecka, J.Sponer, J.Cerny, and P.Hobza, Phys.Chem.Chem.Phys. 8, 1985 (2006).

Table S31: Benchmark Results for the S7L Data Set. Interaction Energies (kcal/mol)

| Complex                           | Ref.               | MNDO | AM1  | PM3   | PM6   | PM7   | OM1  | OM2  |       | OM3   |       |      |       |       |       |
|-----------------------------------|--------------------|------|------|-------|-------|-------|------|------|-------|-------|-------|------|-------|-------|-------|
|                                   |                    |      |      |       |       |       |      | D2   | D3    | D2    | D3    |      |       |       |       |
| Single point calculations         |                    |      |      |       |       |       |      |      |       |       |       |      |       |       |       |
| Naphthalene-Naphthalene_sandwich  | -4.0 <sup>a</sup>  | 3.9  | 2.6  | 1.7   | 0.4   | -9.2  | 1.0  | 2.3  | -1.0  | -2.8  | -2.4  | 1.7  | -2.3  | -4.0  | -3.6  |
| Naphthalene-Naphthalene_displaced | -6.0 <sup>a</sup>  | 7.9  | 4.6  | 3.1   | -0.1  | -8.8  | 1.1  | 1.7  | -2.7  | -4.4  | -4.0  | 1.4  | -4.0  | -5.7  | -5.3  |
| Naphthalene-Naphthalene_displaced | -6.1 <sup>a</sup>  | 8.4  | 5.0  | 3.5   | 0.1   | -9.4  | 1.3  | 2.2  | -2.5  | -4.3  | -3.9  | 1.8  | -4.0  | -5.8  | -5.4  |
| Naphthalene-Naphthalene_cross     | -5.5 <sup>a</sup>  | 6.6  | 4.0  | 2.7   | 0.1   | -9.8  | 1.1  | 2.0  | -2.2  | -4.1  | -3.7  | 1.6  | -3.6  | -5.5  | -5.0  |
| Coronene-Coronene                 | -20.0 <sup>a</sup> | 25.5 | 15.0 | 11.7  | -0.7  | -28.2 | 3.1  | 3.6  | -11.1 | -15.6 | -13.9 | 3.3  | -14.5 | -19.2 | -17.4 |
| Decalin-Decalin_haDZ              | -4.8 <sup>a</sup>  | 8.2  | -1.2 | -5.0  | -1.1  | -7.1  | 1.0  | -1.0 | -4.8  | -6.1  | -5.7  | 0.2  | -4.5  | -5.5  | -5.1  |
| Perhydrocoronene-Perhydrocoronene | -13.6 <sup>a</sup> | 21.6 | -3.4 | -13.0 | -3.0  | -21.6 | 2.6  | -2.8 | -13.8 | -17.7 | -15.7 | 0.8  | -13.1 | -15.9 | -14.0 |
| Full optimizations                |                    |      |      |       |       |       |      |      |       |       |       |      |       |       |       |
| Naphthalene-Naphthalene_sandwich  | -4.0 <sup>a</sup>  | 0.0  | 0.0  | 0.0   | -1.3  | -9.5  | 0.0  | 0.0  | -3.4  | -4.6  | -4.2  | 0.0  | -4.7  | -6.6  | -6.2  |
| Naphthalene-Naphthalene_displaced | -6.0 <sup>a</sup>  | -0.0 | -0.2 | -3.2  | -1.3  | -9.5  | -0.4 | -1.3 | -5.2  | -6.0  | -5.7  | -0.0 | -5.7  | -7.4  | -7.0  |
| Naphthalene-Naphthalene_displaced | -6.1 <sup>a</sup>  | -0.0 | -0.0 | -0.0  | -1.6  | -9.8  | -0.0 | -0.0 | -5.3  | -6.1  | -5.7  | -0.3 | -5.8  | -7.7  | -7.3  |
| Naphthalene-Naphthalene_cross     | -5.5 <sup>a</sup>  | 0.0  | 0.0  | 0.0   | -1.6  | -9.9  | 0.0  | 0.0  | -5.2  | -6.0  | -5.5  | 0.0  | -5.8  | -7.7  | -7.3  |
| Coronene-Coronene                 | -20.0 <sup>a</sup> | -0.0 | -0.4 | -0.0  | -1.6  | -28.9 | -0.0 | -0.0 | -17.4 | -19.0 | -17.2 | -0.7 | -18.5 | -23.0 | -21.2 |
| Decalin-Decalin_haDZ              | -4.8 <sup>a</sup>  | -0.0 | -1.6 | -9.5  | -3.8  | -8.6  | -0.0 | -2.0 | -7.8  | -8.7  | -8.2  | -0.0 | -6.2  | -6.6  | -6.1  |
| Perhydrocoronene-Perhydrocoronene | -13.6 <sup>a</sup> | -0.0 | -4.2 | -14.8 | -12.6 | -25.7 | -0.1 | -5.0 | -21.8 | -24.7 | -22.2 | -0.1 | -17.5 | -18.5 | -16.2 |

<sup>a</sup> T.Janowski and P.Pulay, J.Am.Chem.Soc. 134, 17520 (2012).

Table S32: Benchmark Results for the S30L-CHNOF Data Set. Interaction Energies (kcal/mol)

| Complex | Ref.                | MNDO  | AMI   | PM3   | PM6    | PM7    | OM1   |        | OM2    |        | OM3    |        | D3T    |
|---------|---------------------|-------|-------|-------|--------|--------|-------|--------|--------|--------|--------|--------|--------|
|         |                     |       |       |       |        |        | D2    | D3     | D2     | D3     | D2     | D3     |        |
| # 1     | -29.0 <sup>a</sup>  | 51.3  | 13.4  | 10.0  | -9.1   | -38.5  | 0.7   | -8.1   | -27.4  | -32.3  | -30.5  | -31.9  | -30.1  |
| # 2     | -20.8 <sup>a</sup>  | 36.7  | 9.9   | 6.1   | -4.8   | -26.7  | 2.2   | -2.9   | -17.0  | -20.5  | -19.2  | -16.8  | -19.3  |
| # 3     | -23.5 <sup>a</sup>  | 56.7  | 24.1  | 24.1  | -6.4   | -32.0  | 0.8   | -4.0   | -20.9  | -24.9  | -23.0  | -25.1  | -27.6  |
| # 5     | -29.0 <sup>a</sup>  | 42.5  | 15.0  | 15.7  | -12.2  | -45.6  | -4.4  | -8.1   | -29.0  | -34.6  | -32.4  | -31.5  | -37.4  |
| # 6     | -25.5 <sup>a</sup>  | 54.0  | 23.2  | 18.4  | -5.6   | -35.5  | 4.6   | 1.2    | -18.1  | -23.6  | -21.6  | -20.0  | -24.5  |
| # 7     | -35.1 <sup>a</sup>  | 58.3  | 31.6  | 24.0  | -0.4   | -49.4  | 6.9   | 7.4    | -20.6  | -30.0  | -28.1  | -25.6  | -34.1  |
| # 8     | -36.8 <sup>a</sup>  | 62.4  | 34.2  | 25.6  | -0.7   | -57.3  | 7.2   | 8.4    | -22.8  | -33.9  | -31.7  | -28.6  | -38.5  |
| # 9     | -28.4 <sup>a</sup>  | 57.8  | 30.4  | 28.1  | -1.1   | -57.2  | 7.5   | 1.9    | -26.8  | -32.7  | -29.4  | -29.9  | -32.8  |
| # 10    | -29.8 <sup>a</sup>  | 61.5  | 32.1  | 29.7  | -0.4   | -60.8  | 9.1   | 3.3    | -27.0  | -33.7  | -30.1  | -30.5  | -33.7  |
| # 13    | -30.8 <sup>a</sup>  | 38.0  | 7.2   | 5.1   | -8.9   | -35.8  | -2.1  | -3.7   | -20.2  | -25.5  | -22.5  | -21.9  | -23.7  |
| # 17    | -33.4 <sup>a</sup>  | 63.9  | -10.7 | 1.3   | -22.7  | -45.0  | -6.0  | -20.7  | -34.1  | -36.5  | -35.4  | -30.0  | -31.8  |
| # 18    | -23.3 <sup>a</sup>  | 52.7  | -5.5  | 5.0   | -14.9  | -34.6  | -1.7  | -12.1  | -23.8  | -26.7  | -25.6  | -21.4  | -23.5  |
| # 19    | -17.5 <sup>a</sup>  | 35.8  | -2.4  | -3.4  | -5.4   | -19.3  | 1.9   | -2.6   | -12.1  | -15.4  | -13.8  | -11.9  | -13.0  |
| # 20    | -19.2 <sup>a</sup>  | 52.6  | -0.8  | -5.2  | -6.4   | -25.2  | 6.5   | -2.4   | -16.3  | -20.7  | -18.4  | -16.0  | -17.0  |
| # 21    | -24.2 <sup>a</sup>  | 53.2  | 11.2  | 15.3  | -4.5   | -33.2  | 4.9   | 1.0    | -17.8  | -23.8  | -20.4  | -19.3  | -20.9  |
| # 22    | -42.6 <sup>a</sup>  | 51.1  | -9.3  | -12.6 | -24.1  | -49.3  | -11.6 | -25.4  | -33.3  | -35.0  | -34.9  | -34.7  | -36.6  |
| # 23    | -61.3 <sup>a</sup>  | 6.1   | -25.8 | -32.7 | -43.4  | -72.1  | -41.1 | -43.8  | -49.1  | -50.4  | -50.6  | -53.0  | -54.9  |
| # 24    | -135.5 <sup>a</sup> | 26.8  | -97.8 | -75.2 | -126.2 | -183.8 | -99.4 | -121.2 | -153.5 | -162.2 | -156.3 | -146.8 | -148.2 |
| # 25    | -26.0 <sup>a</sup>  | 38.8  | 17.9  | 12.3  | -0.9   | -50.5  | 3.5   | 1.9    | -18.5  | -27.1  | -24.4  | -20.7  | -26.4  |
| # 26    | -25.8 <sup>a</sup>  | 38.5  | 17.8  | 12.2  | -0.7   | -50.9  | 3.6   | 2.1    | -18.3  | -27.0  | -24.2  | -20.5  | -26.3  |
| # 27    | -82.2 <sup>a</sup>  | -9.0  | -58.5 | -50.7 | -75.1  | -112.6 | -66.9 | -77.5  | -90.6  | -95.0  | -92.7  | -87.3  | -88.9  |
| # 28    | -80.1 <sup>a</sup>  | -16.5 | -60.1 | -51.3 | -74.8  | -110.5 | -66.4 | -76.5  | -87.5  | -91.2  | -89.3  | -83.6  | -84.9  |
| # 29    | -53.5 <sup>a</sup>  | 29.2  | -32.9 | -40.2 | -42.8  | -53.6  | -33.4 | -38.0  | -46.4  | -47.6  | -47.1  | -50.4  | -50.9  |
| # 30    | -49.3 <sup>a</sup>  | 33.7  | -25.6 | -34.0 | -37.4  | -53.7  | -26.4 | -30.7  | -41.0  | -43.4  | -42.7  | -45.6  | -47.0  |

<sup>a</sup> R.Sure and S.Grimme, J.Chem.Theory Comput. 11, 3785 (2015). Correction see: J.Chem.Theory Comput. 11, 5990 (2015).

Table S33: Benchmark Results for the AF6 Data Set. Folding Energies/Enthalpies (kcal/mol)

| Molecule                  | Ref.              | $\Delta E$        | $\Delta H_{298}^{\circ}$ | MNDO |      | AM1 | PM3  | PM6 | PM7 | OM1 | OM2  |      | OM3  |     | OM3  |      |      |
|---------------------------|-------------------|-------------------|--------------------------|------|------|-----|------|-----|-----|-----|------|------|------|-----|------|------|------|
|                           |                   |                   |                          | D2   | D3   | D2  | D3   | D2  | D3  | D2  | D3   | D2   | D3   | D2  | D3   |      |      |
| Single point calculations |                   |                   |                          |      |      |     |      |     |     |     |      |      |      |     |      |      |      |
| c8 n-alkane bowl G+G      | 1.6 <sup>a</sup>  | 1.8 <sup>a</sup>  | 8.4                      | 3.5  | 2.3  | 2.3 | 2.6  | 1.7 | 3.8 | 3.7 | 2.0  | 2.3  | 2.4  | 4.7 | 2.7  | 2.9  | 3.0  |
| c10 n-alkane hairpin      | 1.4 <sup>a</sup>  | 1.5 <sup>a</sup>  | 9.2                      | 3.3  | 2.2  | 2.2 | 2.2  | 1.1 | 3.8 | 3.4 | 1.5  | 1.7  | 1.8  | 4.7 | 2.4  | 2.5  | 2.7  |
| c12 n-alkane hairpin      | 1.0 <sup>a</sup>  | 1.1 <sup>a</sup>  | 10.1                     | 3.4  | 2.0  | 2.3 | 0.5  | 4.1 | 3.5 | 3.5 | 1.2  | 1.3  | 1.5  | 4.8 | 2.1  | 2.2  | 2.3  |
| c14 n-alkane hairpin      | 0.1 <sup>a</sup>  | 0.3 <sup>a</sup>  | 18.5                     | 4.4  | 0.7  | 2.1 | -1.4 | 6.8 | 4.4 | 4.4 | 0.1  | -0.1 | 0.2  | 6.3 | 0.9  | 0.8  | 1.1  |
| c16 n-alkane hairpin      | -0.6 <sup>a</sup> | -0.5 <sup>a</sup> | 19.8                     | 4.1  | -0.2 | 1.8 | -2.5 | 6.9 | 4.1 | 4.1 | -0.8 | -1.1 | -0.8 | 6.2 | 0.1  | -0.1 | 0.2  |
| c18 n-alkane hairpin      | -1.6 <sup>a</sup> | -1.4 <sup>a</sup> | 23.1                     | 4.2  | -0.7 | 1.7 | -3.5 | 7.4 | 4.1 | 4.1 | -1.7 | -2.1 | -1.7 | 6.7 | -0.6 | -0.9 | -0.5 |
| Full optimizations        |                   |                   |                          |      |      |     |      |     |     |     |      |      |      |     |      |      |      |
| c8 n-alkane bowl G+G      | 1.6 <sup>a</sup>  | 1.8 <sup>a</sup>  | 2.9                      | 2.9  | 0.9  | 2.3 | 1.8  | 3.9 | 3.1 | 3.1 | 1.8  | 2.0  | 2.0  | 3.4 | 2.0  | 2.2  | 2.2  |
| c10 n-alkane hairpin      | 1.4 <sup>a</sup>  | 1.5 <sup>a</sup>  | 3.1                      | 3.0  | -1.0 | 2.0 | 1.1  | 4.0 | 3.0 | 3.0 | 1.5  | 1.6  | 1.7  | 3.4 | 1.8  | 1.9  | 2.0  |
| c12 n-alkane hairpin      | 1.0 <sup>a</sup>  | 1.1 <sup>a</sup>  | 3.1                      | 3.0  | -2.0 | 2.1 | 0.2  | 4.0 | 3.0 | 3.0 | 0.6  | 0.6  | 0.8  | 3.4 | 1.4  | 1.2  | 1.4  |
| c14 n-alkane hairpin      | 0.1 <sup>a</sup>  | 0.3 <sup>a</sup>  | 3.1                      | 3.0  | -1.6 | 2.2 | -0.7 | 4.0 | 3.0 | 3.0 | -0.3 | -0.3 | -0.0 | 3.4 | 0.6  | 0.3  | 0.6  |
| c16 n-alkane hairpin      | -0.6 <sup>a</sup> | -0.5 <sup>a</sup> | 3.1                      | 3.9  | -2.2 | 2.0 | -1.8 | 4.0 | 3.0 | 3.0 | -1.4 | -1.5 | -1.1 | 3.4 | -0.2 | -0.5 | -0.2 |
| c18 n-alkane hairpin      | -1.6 <sup>a</sup> | -1.4 <sup>a</sup> | 3.1                      | 3.9  | -3.0 | 1.9 | -2.8 | 4.0 | 3.0 | 3.0 | -2.4 | -2.5 | -2.1 | 3.4 | -1.0 | -1.4 | -1.0 |

<sup>a</sup> J.N.Byrd, R.J.Bartlett, and J.A.Montgomery Jr., J.Phys.Chem.A 118, 1706 (2014).

## 4 Figures: Error Distributions and Reference and Optimized SQC Geometries of Selected Noncovalent Complexes

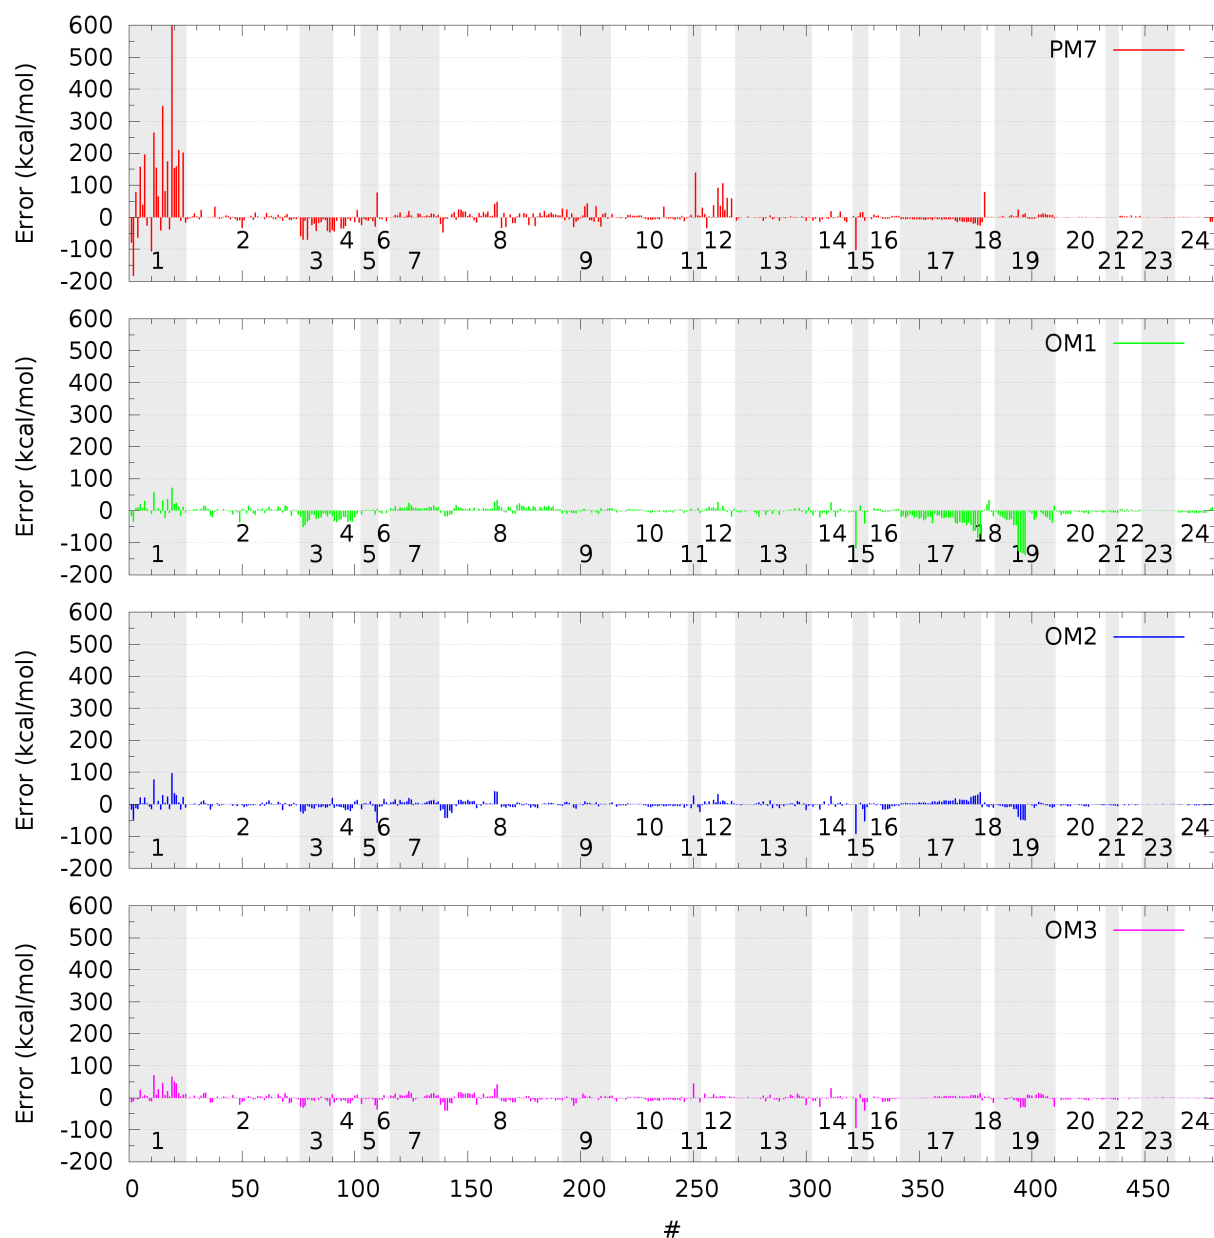

Figure S1: Error distribution of ground-state properties calculated at the  $OM_x$  and PM7 levels of theory for the GMTKN30-CHNOF benchmark set (including the MB08-165 subset and the isomerization energy of  $C_{20}$ ). The subsets are marked with alternating gray and white backgrounds and their numbers correspond to those in Table 6 in the main text.

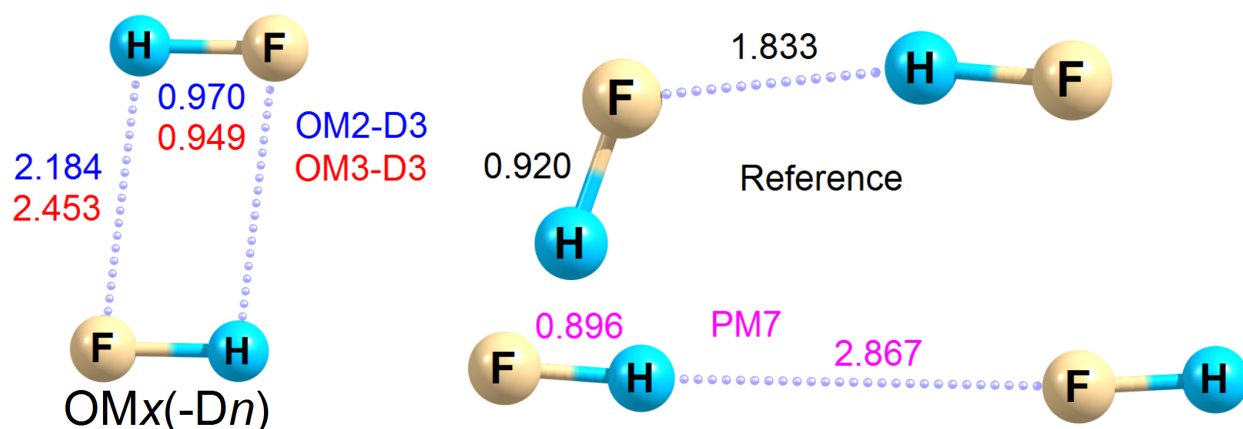

Figure S2: Reference geometry of the HF dimer from the A24 benchmark set (top right) and geometries optimized at OM2, OM3, and OM $x$ -D $n$  (left) and PM7 (bottom right). Selected interatomic distances are shown in Ångstrom for the reference (black), OM2-D3 (blue), OM3-D3 (red), and PM7 (pink) geometries.

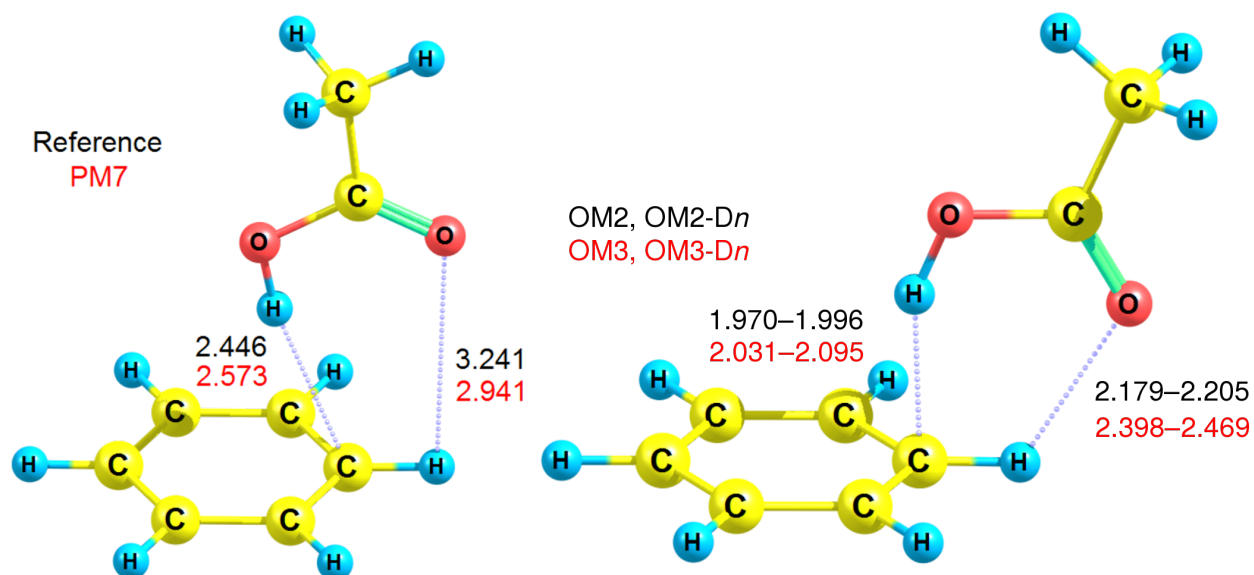

Figure S3: Reference and PM7 geometries of the benzene...AcOH (OH- $\pi$ ) complex from the S66 benchmark set (left) and geometries optimized at OM2, OM3, and OM $x$ -D $n$  (right). Selected interatomic distances are shown in Ångstrom. The  $C_6H_5-H \cdots O=C(OH)CH_3$  intermolecular distance is too short by 0.821...1.062 Å in the OM $x$ -D $n$  geometries.



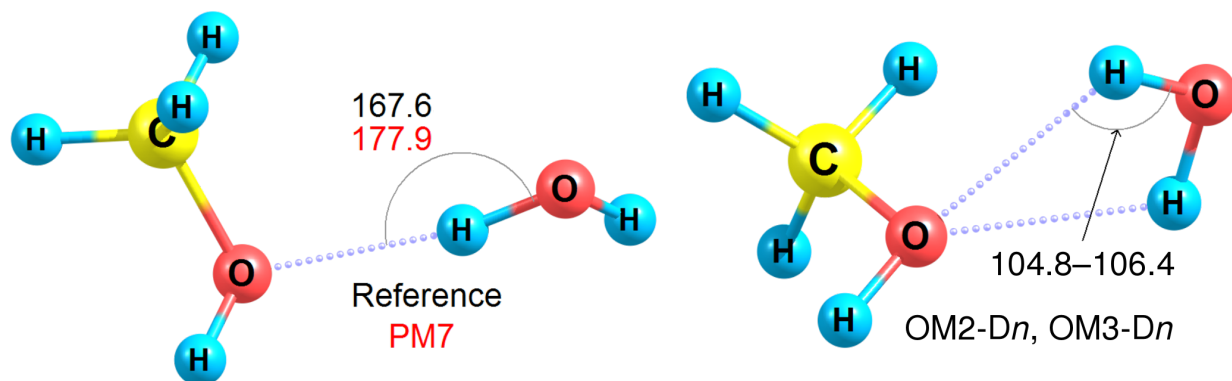

Figure S4: Reference,  $OMx$ - $Dn$ , and PM7 geometries of the  $H_2O \cdots MeOH$  complex from the S66 benchmark set. Selected angles are shown in degrees.

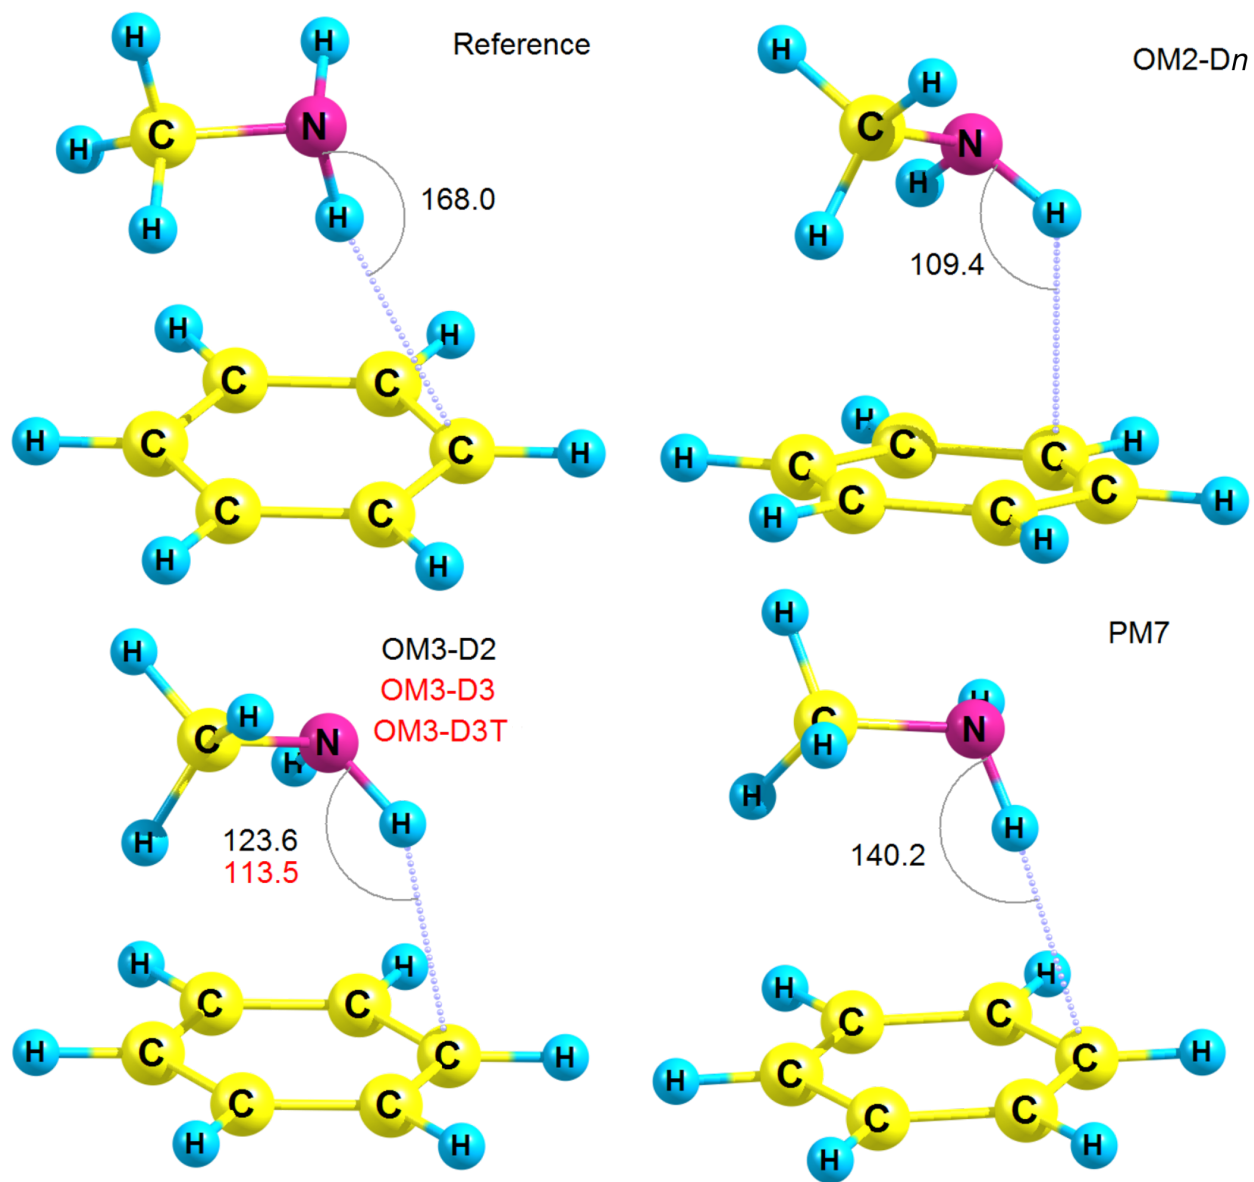

Figure S5: Reference,  $OM_x-D_n$ , and PM7 geometries of the  $C_6H_6 \cdots MeNH_2$  complex from the S66 benchmark set. Selected angles are shown in degrees.

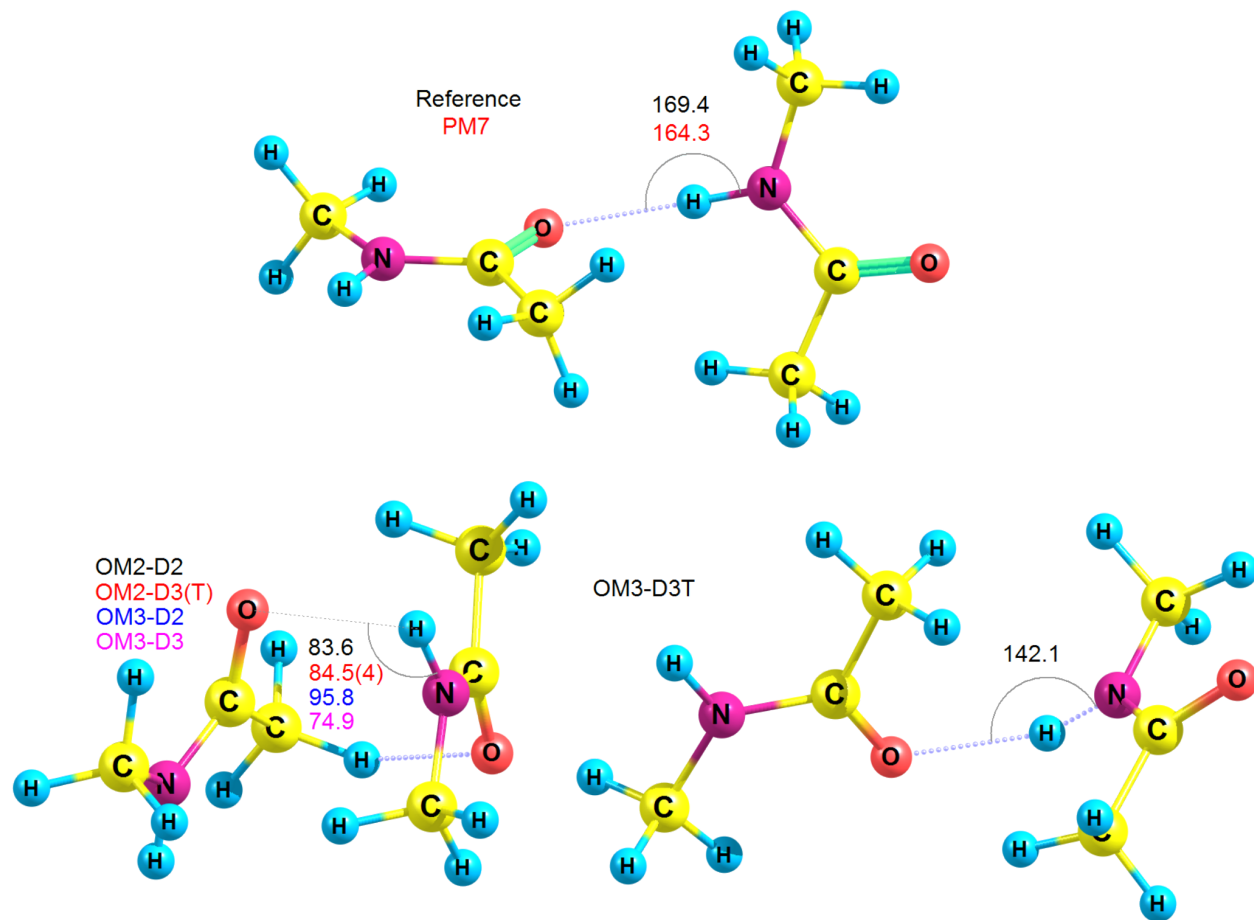

Figure S6: Reference,  $OM_x-D_n$ , and PM7 geometries of the peptide...peptide complex from the S66 benchmark set. Selected angles are shown in degrees.

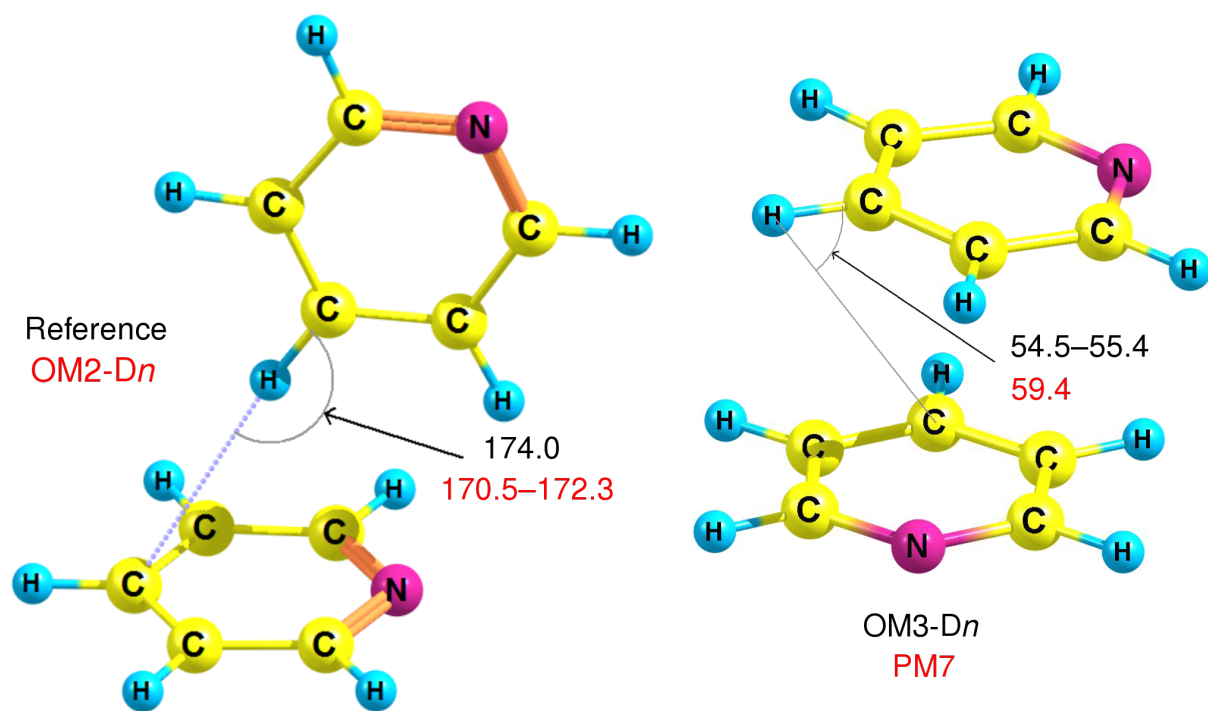

Figure S7: Reference and OM2-Dn geometries of the T-shaped pyridine dimer (left) from the S66 benchmark set and geometries optimized at PM7 and OM3-Dn (right). Selected angles are shown in degrees.

## 5 Additional Statistical Evaluations for RM1

The RM1 method is a reparametrization of the AM1 method. According to the following statistical evaluations, it tends to be generally more accurate than AM1, about as accurate as the PM $x$  methods, and somewhat less accurate than the OM $x$  methods.

Heats of formation are used as reference data in 12 benchmark sets. RM1 is superior to AM1 in 10 of these sets: Cations<sup>41</sup>, BIGMOL<sup>20</sup>, Conformers<sup>30</sup>, Isomers<sup>44</sup>, and Fluorine<sup>91</sup> (Table S34), G2, G3, and Alkanes<sup>28</sup> (Table S35), PDDG (Table S39), and PM7-CHNOF (Table S40), while the opposite is true for Radicals<sup>71</sup> and Anions<sup>24</sup> (Table S34). PM7 and the OM $x$  methods are generally more accurate than RM1, in particularly OM2 and OM3, which have smaller or essentially equal mean absolute errors (MAEs) in 11 out of 12 cases (all except Conformers<sup>30</sup>).

For atomization energies, RM1 is generally more accurate than AM1, but less accurate than PM7 and OM $x$  (see the results for the TAE<sup>140</sup> and TAE<sub>nonMR</sub><sup>124</sup> sets in Table S36, for W4-08 and W4-08woMR in Table S37, for MGAE<sup>109/11</sup> in Table S38, and for C7H<sub>10</sub>O<sub>2</sub> in Table S41). Taking the TAE<sup>140</sup> set as an example, the MAEs for AM1, RM1, PM7, OM2, and OM3 are 9.09, 8.83, 6.51, 4.81, and 6.47 kcal/mol, respectively.

For the large variety of molecules and properties covered by the GMTKN<sup>30</sup>-CHNOF set (Table S37) and by the CE<sup>345</sup>-CHNOF set (Table S38), RM1 tends to perform better than AM1 and the PM $x$  methods, but less well than the OM $x$  methods. According to the overall statistics for GMTKN<sup>30</sup>-CHNOF, the MAEs for AM1, RM1, PM7, OM2, and OM3 are 16.45, 12.43, 16.49, 7.94, and 7.17 kcal/mol, respectively. The corresponding MAEs for CE<sup>345</sup>-CHNOF are 10.08, 9.31, 10.85, 6.40, and 6.89 kcal/mol, respectively.

Table S34: Mean Absolute Errors in Calculated Heats of Formation (kcal/mol), Relative Energies (kcal/mol), Ionization Potentials (eV), Barriers (kcal/mol), Bond Lengths (Å), and Bond Angles (degree) for the OVS7-CHNOF Benchmark Set: MNDO, AM1, RM1, PM $x$ , and OM $x$

| Subset                | N   | Method |       |       |       |       |       |       |       |       |
|-----------------------|-----|--------|-------|-------|-------|-------|-------|-------|-------|-------|
|                       |     | MNDO   | AM1   | RM1   | PM3   | PM6   | PM7   | OM1   | OM2   | OM3   |
| Heats of formation    |     |        |       |       |       |       |       |       |       |       |
| Radicals71            | 42  | 11.86  | 10.60 | 11.00 | 10.94 | 11.13 | 10.04 | 7.28  | 4.98  | 5.57  |
| Anions24              | 24  | 14.41  | 11.29 | 12.34 | 9.59  | 11.43 | 10.65 | 11.55 | 8.37  | 9.56  |
| Cations41             | 36  | 11.52  | 9.96  | 9.67  | 11.45 | 11.12 | 12.07 | 9.32  | 6.93  | 6.89  |
| BIGMOL20              | 20  | 9.20   | 12.11 | 5.98  | 8.25  | 9.43  | 8.57  | 10.45 | 4.85  | 5.05  |
| Conformers30          | 11  | 3.14   | 6.48  | 2.24  | 2.72  | 3.40  | 2.40  | 1.83  | 2.95  | 3.05  |
| Isomers44             | 27  | 6.41   | 4.40  | 2.41  | 2.92  | 2.92  | 2.05  | 3.32  | 1.05  | 1.81  |
| Fluorine91            | 91  | 11.13  | 11.05 | 9.83  | 7.76  | 9.04  | 8.17  | 7.17  | 7.15  | 7.34  |
| Relative energies     |     |        |       |       |       |       |       |       |       |       |
| Radicals71            | 4   | 13.00  | 10.09 | 11.01 | 9.94  | 11.78 | 10.61 | 8.74  | 3.95  | 5.46  |
| Cations41             | 5   | 13.20  | 9.30  | 12.14 | 9.02  | 20.97 | 10.96 | 5.65  | 3.68  | 3.53  |
| Isomers44             | 17  | 8.04   | 5.59  | 1.18  | 3.22  | 1.81  | 1.70  | 5.67  | 0.80  | 2.07  |
| Ionization potentials |     |        |       |       |       |       |       |       |       |       |
| Radicals71            | 25  | 0.88   | 0.73  | 0.68  | 0.84  | 0.79  | 0.80  | 0.38  | 0.37  | 0.53  |
| Barriers              |     |        |       |       |       |       |       |       |       |       |
| Conformers30          | 19  | 2.38   | 2.00  | 1.78  | 2.17  | 2.65  | 2.46  | 1.50  | 1.26  | 1.34  |
| Bond lengths          |     |        |       |       |       |       |       |       |       |       |
| Fluorine91            | 455 | 0.027  | 0.022 | 0.022 | 0.015 | 0.017 | 0.021 | 0.015 | 0.016 | 0.022 |
| Bond angles           |     |        |       |       |       |       |       |       |       |       |
| Fluorine91            | 355 | 3.41   | 3.28  | 3.10  | 2.94  | 3.68  | 3.17  | 1.97  | 2.04  | 1.78  |

Table S35: Mean Absolute Errors in Calculated Heats of Formation (kcal/mol) and Relative Energies (kcal/mol) for the G2G3-CHNOF Benchmark Set: MNDO, AM1, RM1, PM $x$ , and OM $x$

| Subset             | N  | Method |      |      |      |      |      |      |      |      |
|--------------------|----|--------|------|------|------|------|------|------|------|------|
|                    |    | MNDO   | AM1  | RM1  | PM3  | PM6  | PM7  | OM1  | OM2  | OM3  |
| Heats of formation |    |        |      |      |      |      |      |      |      |      |
| G2                 | 93 | 7.71   | 7.44 | 5.55 | 6.86 | 5.69 | 5.14 | 4.64 | 3.37 | 3.83 |
| G3                 | 52 | 7.51   | 6.73 | 4.28 | 5.01 | 3.86 | 3.40 | 4.25 | 3.18 | 3.71 |
| Alkanes28          | 22 | 3.26   | 8.81 | 2.62 | 2.03 | 4.20 | 1.76 | 2.16 | 1.91 | 0.72 |
| Relative energies  |    |        |      |      |      |      |      |      |      |      |
| Alkanes28          | 6  | 6.16   | 4.35 | 0.88 | 1.76 | 1.05 | 1.51 | 4.68 | 0.61 | 1.48 |

Table S36: Mean Absolute Errors in Calculated Atomization and Reaction Energies (kcal/mol) for the W4-11-CHNOF Benchmark Set: MNDO, AM1, RM1, PM $x$ , and OM $x$ <sup>a</sup>

| Subset               | N   | Method |       |       |       |       |       |       |      |      |
|----------------------|-----|--------|-------|-------|-------|-------|-------|-------|------|------|
|                      |     | MNDO   | AM1   | RM1   | PM3   | PM6   | PM7   | OM1   | OM2  | OM3  |
| TAE140 (corr.)       | 88  | 11.90  | 9.09  | 8.83  | 8.00  | 7.73  | 6.51  | 7.02  | 4.81 | 6.47 |
| TAE_nonMR124 (corr.) | 80  | 9.45   | 8.26  | 7.23  | 7.28  | 7.73  | 6.75  | 6.25  | 4.84 | 6.05 |
| BDE99                | 79  | 17.24  | 12.75 | 14.41 | 13.77 | 12.19 | 10.01 | 10.54 | 8.15 | 9.65 |
| BDE99 (corr.)        | 79  | 14.91  | 10.86 | 12.64 | 12.22 | 10.56 | 8.26  | 8.28  | 6.25 | 7.51 |
| HAT707               | 394 | 20.85  | 16.50 | 14.70 | 12.72 | 13.96 | 11.64 | 10.55 | 8.92 | 9.44 |
| HAT707 (corr.)       | 394 | 21.08  | 16.70 | 14.82 | 12.74 | 13.89 | 11.52 | 10.83 | 9.17 | 9.73 |
| ISOMER20             | 19  | 8.65   | 7.65  | 9.96  | 7.68  | 9.37  | 8.48  | 8.67  | 8.54 | 8.32 |
| ISOMER20 (corr.)     | 19  | 8.90   | 7.77  | 10.21 | 8.09  | 9.23  | 8.33  | 8.47  | 8.34 | 8.13 |
| SN13                 | 13  | 8.23   | 7.70  | 5.07  | 4.98  | 5.43  | 3.14  | 4.02  | 5.55 | 4.31 |
| SN13 (corr.)         | 13  | 7.30   | 6.01  | 4.22  | 4.05  | 4.39  | 3.59  | 5.14  | 5.36 | 4.98 |

<sup>a</sup> (corr.) means that energies are obtained by removing ZPVE and thermal corrections from the SQC results (see text).

Table S37: Mean Absolute Errors (kcal/mol) for the GMTKN30-CHNOF Benchmark Set: MNDO, AM1, RM1, PM $x$ , and OM $x$ <sup>a</sup>

| #   | Subset                         | N   | Method |        |        |        |        |        |        |       |       |
|-----|--------------------------------|-----|--------|--------|--------|--------|--------|--------|--------|-------|-------|
|     |                                |     | MNDO   | AM1    | RM1    | PM3    | PM6    | PM7    | OM1    | OM2   | OM3   |
|     | Overall                        | 480 | 27.48  | 16.45  | 12.43  | 14.44  | 16.29  | 16.49  | 11.93  | 7.94  | 7.17  |
|     | Overall* <sup>b</sup>          | 454 | 27.34  | 14.65  | 11.13  | 11.26  | 10.17  | 9.60   | 11.29  | 6.95  | 6.30  |
| 1   | MB08-165                       | 25  | 25.53  | 43.66  | 38.21  | 68.73  | 124.39 | 138.35 | 19.47  | 22.47 | 19.46 |
| 1   | MB08-165 (corr.) <sup>c</sup>  | 25  | 26.52  | 31.84  | 36.12  | 52.27  | 119.53 | 134.55 | 11.04  | 12.20 | 15.03 |
| 2   | W4-08 (corr.)                  | 50  | 14.11  | 10.24  | 9.92   | 9.33   | 7.95   | 6.53   | 7.58   | 4.19  | 6.20  |
| 2a  | W4-08woMR <sup>d</sup> (corr.) | 43  | 10.32  | 8.90   | 7.67   | 7.66   | 8.00   | 6.51   | 6.00   | 4.12  | 5.37  |
| 3   | G21IP                          | 15  | 24.75  | 28.12  | 26.58  | 20.41  | 35.74  | 32.29  | 22.45  | 12.00 | 11.45 |
| 4   | G21EA                          | 12  | 27.44  | 25.84  | 27.09  | 14.23  | 20.08  | 18.94  | 24.81  | 11.39 | 9.31  |
| 5   | PA                             | 8   | 12.48  | 12.87  | 10.46  | 16.12  | 18.45  | 21.46  | 4.96   | 14.82 | 11.99 |
| 6   | SIE11                          | 5   | 21.22  | 9.49   | 10.91  | 12.00  | 4.03   | 4.82   | 4.39   | 7.78  | 4.31  |
| 7   | BHPERI                         | 22  | 25.15  | 9.97   | 6.81   | 14.05  | 9.73   | 6.13   | 10.67  | 8.21  | 8.25  |
| 8   | BH76                           | 54  | 23.84  | 13.06  | 12.19  | 13.36  | 13.39  | 13.68  | 10.39  | 9.72  | 10.66 |
| 9   | BH76RC                         | 22  | 11.88  | 13.49  | 11.26  | 11.57  | 15.72  | 16.28  | 5.28   | 4.29  | 5.37  |
| 10  | RSE43                          | 34  | 5.00   | 3.55   | 4.97   | 4.02   | 6.10   | 5.83   | 3.74   | 4.31  | 5.24  |
| 11  | O3ADD6 <sup>e</sup>            | 6   | 14.90  | 10.57  | 5.51   | 9.87   | 2.03   | 26.84  | 4.01   | 12.24 | 10.97 |
| 12  | G2RC                           | 15  | 9.23   | 13.42  | 12.40  | 21.68  | 29.47  | 33.48  | 9.07   | 8.23  | 4.16  |
| 13  | ISO34                          | 34  | 7.44   | 6.45   | 4.18   | 4.04   | 3.46   | 2.92   | 4.45   | 4.44  | 4.37  |
| 14  | ISOL22                         | 18  | 16.76  | 10.25  | 7.64   | 8.27   | 7.41   | 6.55   | 7.99   | 5.31  | 6.05  |
| 15  | DC9                            | 7   | 41.46  | 35.75  | 28.70  | 25.99  | 17.39  | 21.94  | 26.38  | 25.02 | 24.69 |
| 15a | DC9woC20 <sup>f</sup>          | 6   | 24.66  | 15.68  | 14.55  | 13.30  | 5.18   | 8.64   | 11.40  | 13.59 | 13.20 |
| 15b | C20 <sup>g</sup>               | 1   | 142.25 | 156.16 | 113.62 | 102.09 | 90.66  | 101.72 | 116.24 | 93.63 | 93.61 |
| 16  | DARC                           | 14  | 13.10  | 4.65   | 5.04   | 5.32   | 3.91   | 4.26   | 4.10   | 7.24  | 4.91  |
| 17  | BSR36                          | 36  | 52.36  | 39.56  | 3.05   | 16.66  | 7.38   | 9.63   | 30.29  | 10.77 | 3.46  |
| 17  | BSR36 (corr.) <sup>h</sup>     | 36  | 56.86  | 44.24  | 6.78   | 18.53  | 14.33  | 17.40  | 35.01  | 7.08  | 1.90  |
| 18  | IDISP                          | 6   | 34.58  | 13.52  | 7.29   | 8.58   | 13.78  | 16.82  | 13.69  | 7.34  | 6.19  |
| 19  | WATER27                        | 27  | 165.05 | 48.62  | 46.38  | 31.61  | 17.81  | 5.78   | 36.09  | 12.28 | 9.19  |
| 19  | WATER27 (upd.) <sup>i</sup>    | 27  | 164.26 | 47.83  | 45.60  | 30.82  | 17.02  | 6.51   | 35.30  | 11.49 | 8.40  |
| 20  | S22                            | 22  | 16.74  | 6.78   | 5.85   | 5.91   | 3.37   | 0.76   | 5.10   | 3.05  | 3.54  |
| 21  | ADIM6                          | 6   | 11.37  | 3.14   | 3.19   | 0.48   | 2.78   | 0.22   | 4.30   | 3.13  | 4.09  |
| 22  | PCONF                          | 10  | 10.08  | 5.35   | 3.21   | 3.68   | 2.27   | 2.97   | 3.60   | 1.28  | 1.33  |
| 23  | ACONF                          | 15  | 1.97   | 0.44   | 0.25   | 0.44   | 0.56   | 0.56   | 0.52   | 0.64  | 0.86  |
| 24  | SCONF                          | 17  | 17.52  | 2.39   | 3.94   | 3.05   | 2.61   | 2.38   | 5.87   | 1.67  | 1.32  |

<sup>a</sup> (corr.) means that energies are obtained by removing ZPVE and thermal corrections from the SQC results (see text). <sup>b</sup> Without MB08-165 and C20. <sup>c</sup> Upon geometry optimization, some of the artificial molecules adopted structures very different from the reference geometries so that the computed corrections may be less accurate in these cases (see text). <sup>d</sup> Subset W4-08 without multireference cases. <sup>e</sup> The adduct O<sub>3</sub>+C<sub>2</sub>H<sub>2</sub> is better described as open-shell singlet at OM $x$ -D $n$ . <sup>f</sup> Subset DC9 without C<sub>20</sub> bowl/cage isomerization energy. <sup>g</sup> C<sub>20</sub> bowl/cage isomerization energy. <sup>h</sup> For some SQC methods the corrections suffer from large accumulation errors (see text). <sup>i</sup> Reference dissociation energies of four (H<sub>2</sub>O)<sub>20</sub> clusters were updated with more accurate values from Ref. S4 (see text).



Table S38: Mean Absolute Errors (kcal/mol) for the CE345-CHNOF Benchmark Set: MNDO, AM1, RM1, PM $x$ , and OM $x$ <sup>a</sup>

| #  | Subset                 | N   | Method |       |       |       |       |       |       |       |       |
|----|------------------------|-----|--------|-------|-------|-------|-------|-------|-------|-------|-------|
|    |                        |     | MNDO   | AM1   | RM1   | PM3   | PM6   | PM7   | OM1   | OM2   | OM3   |
|    | Overall <sup>b</sup>   | 186 | 15.33  | 10.08 | 9.31  | 9.85  | 10.94 | 10.85 | 7.91  | 6.40  | 6.89  |
| 1  | MGAE109/11 (corr.)     | 74  | 7.89   | 6.94  | 5.91  | 6.73  | 7.42  | 6.28  | 4.98  | 4.26  | 4.73  |
| 2  | IsoL6/11               | 6   | 9.25   | 4.63  | 3.46  | 3.74  | 2.41  | 2.05  | 7.68  | 1.99  | 3.22  |
| 3  | IP21                   | 4   | 25.29  | 21.39 | 30.79 | 19.48 | 61.38 | 55.91 | 31.85 | 13.24 | 11.91 |
| 4  | EA13/03                | 4   | 28.56  | 21.36 | 25.57 | 11.75 | 16.67 | 18.20 | 31.16 | 9.80  | 9.18  |
| 5  | PA8/06                 | 4   | 11.68  | 16.27 | 15.63 | 19.52 | 25.28 | 29.98 | 4.83  | 25.04 | 17.89 |
| 6  | ABDE12 (corr.)         | 12  | 28.94  | 17.92 | 22.43 | 21.64 | 18.39 | 19.92 | 8.19  | 8.98  | 10.52 |
| 7  | HC7/11                 | 7   | 17.97  | 16.24 | 4.69  | 6.26  | 4.57  | 9.18  | 12.81 | 8.66  | 6.75  |
| 8  | $\pi$ TC13             | 13  | 12.25  | 6.16  | 4.94  | 12.00 | 9.22  | 10.58 | 2.82  | 2.54  | 5.17  |
| 9  | HTBH38/08              | 26  | 25.36  | 10.79 | 5.84  | 9.52  | 10.50 | 11.77 | 11.29 | 4.96  | 5.99  |
| 10 | NHTBH38/08             | 23  | 22.16  | 15.16 | 18.03 | 15.66 | 16.44 | 15.53 | 9.60  | 13.64 | 14.18 |
| 11 | NCCE31/05 <sup>b</sup> | 13  | 11.46  | 4.52  | 4.05  | 3.19  | 2.70  | 1.58  | 3.48  | 2.15  | 2.61  |

<sup>a</sup> (corr.) means that energies are obtained by removing ZPVE and thermal corrections from the SQC results (see text). <sup>b</sup> SCF calculations of the  $\text{NH}_3 \cdots \text{F}_2$  complex in the NCCE31 subset could not be converged with OM2 and OM3; thus we excluded this complex from the statistics.

Table S39: Mean Absolute Errors in Calculated Heats of Formation (kcal/mol), Bond Lengths (Å), Bond Angles (degree), Dihedral Angles (degree), Ionization Potentials (eV), and Dipole Moments (D) for the PDDG Benchmark Set and Its Subsets: MNDO, AM1, RM1, PM $x$ , and OM $x$

| Subset                | N   | Method |       |       |       |       |       |       |       |       |
|-----------------------|-----|--------|-------|-------|-------|-------|-------|-------|-------|-------|
|                       |     | MNDO   | AM1   | RM1   | PM3   | PM6   | PM7   | OM1   | OM2   | OM3   |
| Heats of formation    |     |        |       |       |       |       |       |       |       |       |
| Overall               | 622 | 8.04   | 6.72  | 3.92  | 4.24  | 4.05  | 3.34  | 5.51  | 3.55  | 3.68  |
| CH                    | 254 | 7.92   | 5.63  | 3.76  | 3.40  | 3.70  | 3.19  | 4.92  | 2.30  | 2.38  |
| CHN                   | 89  | 6.01   | 7.30  | 4.10  | 4.61  | 4.54  | 4.63  | 6.77  | 5.01  | 4.86  |
| CHO                   | 238 | 8.03   | 7.15  | 3.92  | 4.55  | 4.12  | 3.01  | 4.97  | 3.86  | 4.58  |
| CHNO                  | 41  | 13.25  | 9.70  | 4.62  | 6.93  | 4.76  | 3.41  | 9.53  | 6.24  | 3.96  |
| Bond lengths          |     |        |       |       |       |       |       |       |       |       |
| Overall               | 153 | 0.013  | 0.016 | 0.013 | 0.011 | 0.012 | 0.011 | 0.012 | 0.014 | 0.018 |
| CH                    | 81  | 0.011  | 0.013 | 0.011 | 0.012 | 0.009 | 0.010 | 0.013 | 0.011 | 0.010 |
| CHN                   | 34  | 0.012  | 0.015 | 0.013 | 0.011 | 0.012 | 0.010 | 0.009 | 0.015 | 0.025 |
| CHO                   | 35  | 0.019  | 0.020 | 0.015 | 0.009 | 0.016 | 0.013 | 0.013 | 0.020 | 0.026 |
| CHNO                  | 3   | 0.024  | 0.038 | 0.026 | 0.009 | 0.026 | 0.018 | 0.010 | 0.027 | 0.044 |
| C–H                   | 38  | 0.008  | 0.011 | 0.008 | 0.008 | 0.010 | 0.012 | 0.009 | 0.010 | 0.013 |
| C–C                   | 52  | 0.012  | 0.015 | 0.011 | 0.012 | 0.011 | 0.010 | 0.013 | 0.010 | 0.010 |
| C=C                   | 15  | 0.012  | 0.011 | 0.010 | 0.010 | 0.008 | 0.007 | 0.013 | 0.009 | 0.009 |
| C≡C                   | 5   | 0.009  | 0.010 | 0.026 | 0.015 | 0.002 | 0.005 | 0.004 | 0.019 | 0.025 |
| N–C                   | 7   | 0.016  | 0.020 | 0.022 | 0.021 | 0.029 | 0.017 | 0.016 | 0.018 | 0.018 |
| N–H                   | 4   | 0.005  | 0.012 | 0.008 | 0.019 | 0.006 | 0.002 | 0.003 | 0.007 | 0.044 |
| N≡C                   | 5   | 0.009  | 0.007 | 0.002 | 0.006 | 0.002 | 0.004 | 0.005 | 0.017 | 0.046 |
| O–H                   | 6   | 0.012  | 0.013 | 0.011 | 0.010 | 0.032 | 0.025 | 0.011 | 0.037 | 0.058 |
| O–C                   | 7   | 0.018  | 0.015 | 0.017 | 0.015 | 0.024 | 0.011 | 0.015 | 0.018 | 0.022 |
| O=C                   | 9   | 0.014  | 0.021 | 0.007 | 0.006 | 0.006 | 0.007 | 0.011 | 0.015 | 0.019 |
| Bond angles           |     |        |       |       |       |       |       |       |       |       |
| Overall               | 54  | 2.97   | 1.98  | 2.28  | 2.09  | 2.15  | 2.12  | 2.04  | 2.17  | 1.90  |
| CH                    | 20  | 1.57   | 0.73  | 1.17  | 0.89  | 0.88  | 1.12  | 1.14  | 1.37  | 0.94  |
| CHN                   | 12  | 1.94   | 1.42  | 1.91  | 1.88  | 1.74  | 1.80  | 1.90  | 1.30  | 1.33  |
| CHO                   | 21  | 4.46   | 3.21  | 3.24  | 3.12  | 3.33  | 3.04  | 2.66  | 3.08  | 2.76  |
| ∠CCH                  | 16  | 1.32   | 1.03  | 1.46  | 1.14  | 1.62  | 1.64  | 1.23  | 1.02  | 1.00  |
| ∠CCC                  | 13  | 2.11   | 0.96  | 1.27  | 1.17  | 0.78  | 1.06  | 1.27  | 1.78  | 1.19  |
| ∠OCH                  | 3   | 1.61   | 3.26  | 3.52  | 3.46  | 4.04  | 3.75  | 2.27  | 3.03  | 3.02  |
| ∠COH                  | 3   | 7.71   | 2.38  | 3.78  | 2.91  | 5.41  | 6.16  | 2.43  | 2.75  | 3.23  |
| ∠OCC                  | 5   | 2.18   | 2.06  | 2.25  | 2.38  | 2.13  | 2.01  | 1.62  | 2.59  | 1.81  |
| Dihedral angles       |     |        |       |       |       |       |       |       |       |       |
| Overall               | 6   | 26.42  | 19.94 | 14.98 | 28.90 | 28.88 | 28.87 | 8.02  | 8.53  | 5.74  |
| CH                    | 3   | 3.40   | 5.16  | 6.04  | 5.83  | 5.39  | 5.83  | 5.20  | 6.00  | 5.43  |
| ∠CCCC                 | 3   | 3.40   | 5.16  | 6.04  | 5.83  | 5.39  | 5.83  | 5.20  | 6.00  | 5.43  |
| Ionization potentials |     |        |       |       |       |       |       |       |       |       |
| Overall               | 97  | 0.70   | 0.53  | 0.47  | 0.60  | 0.52  | 0.52  | 0.48  | 0.37  | 0.60  |
| CH                    | 41  | 0.74   | 0.49  | 0.44  | 0.61  | 0.48  | 0.54  | 0.50  | 0.35  | 0.57  |
| CHN                   | 21  | 0.61   | 0.46  | 0.47  | 0.51  | 0.52  | 0.55  | 0.40  | 0.28  | 0.44  |
| CHO                   | 31  | 0.67   | 0.60  | 0.50  | 0.60  | 0.53  | 0.45  | 0.46  | 0.42  | 0.75  |
| CHNO                  | 4   | 1.00   | 0.83  | 0.64  | 1.01  | 0.83  | 0.74  | 0.85  | 0.66  | 0.66  |
| Dipole moments        |     |        |       |       |       |       |       |       |       |       |
| Overall               | 47  | 0.32   | 0.24  | 0.20  | 0.27  | 0.37  | 0.38  | 0.26  | 0.27  | 0.25  |
| CH                    | 10  | 0.24   | 0.15  | 0.11  | 0.15  | 0.26  | 0.26  | 0.10  | 0.11  | 0.11  |
| CHN                   | 14  | 0.52   | 0.46  | 0.35  | 0.38  | 0.52  | 0.55  | 0.43  | 0.25  | 0.30  |
| CHO                   | 20  | 0.20   | 0.12  | 0.14  | 0.22  | 0.34  | 0.34  | 0.23  | 0.34  | 0.27  |
| CHNO                  | 3   | 0.56   | 0.25  | 0.21  | 0.53  | 0.31  | 0.33  | 0.24  | 0.44  | 0.41  |

Table S40: Mean Absolute Errors in Calculated Heats of Formation (kcal/mol), Bond Lengths (Å), Bond Angles (degree), Dihedral Angles (degree), Ionization Potentials (eV), and Dipole Moments (D) for the PM7-CHNOF Benchmark Set and Its Subsets: MNDO, AM1, RM1, PM $x$ , and OM $x$

| Subset                | N    | Method |       |       |       |       |       |       |       |       |
|-----------------------|------|--------|-------|-------|-------|-------|-------|-------|-------|-------|
|                       |      | MNDO   | AM1   | RM1   | PM3   | PM6   | PM7   | OM1   | OM2   | OM3   |
| Heats of formation    |      |        |       |       |       |       |       |       |       |       |
| Overall               | 1168 | 11.26  | 9.30  | 4.84  | 5.51  | 4.43  | 3.78  | 8.25  | 4.85  | 4.83  |
| DA                    | 5    | 8.31   | 17.43 | 14.90 | 12.09 | 20.62 | 18.61 | 5.27  | 3.26  | 2.15  |
| CH                    | 310  | 13.67  | 9.85  | 4.94  | 5.23  | 4.72  | 4.18  | 9.23  | 4.16  | 3.63  |
| CHN                   | 214  | 7.63   | 7.19  | 4.47  | 5.32  | 3.73  | 3.42  | 7.90  | 5.43  | 5.69  |
| CHO                   | 373  | 9.26   | 8.03  | 4.56  | 5.42  | 4.33  | 3.40  | 6.43  | 4.22  | 5.18  |
| CHF                   | 32   | 6.73   | 8.15  | 5.16  | 6.25  | 3.77  | 4.54  | 2.42  | 3.50  | 2.44  |
| CHNO                  | 234  | 15.24  | 12.48 | 5.22  | 5.97  | 4.59  | 3.74  | 11.01 | 6.46  | 5.43  |
| Bond lengths          |      |        |       |       |       |       |       |       |       |       |
| Overall               | 175  | 0.026  | 0.020 | 0.015 | 0.015 | 0.015 | 0.013 | 0.015 | 0.015 | 0.019 |
| DA                    | 4    | 0.079  | 0.056 | 0.076 | 0.039 | 0.043 | 0.033 | 0.023 | 0.036 | 0.053 |
| CH                    | 74   | 0.010  | 0.014 | 0.012 | 0.012 | 0.009 | 0.010 | 0.013 | 0.011 | 0.011 |
| CHN                   | 31   | 0.011  | 0.015 | 0.011 | 0.011 | 0.013 | 0.010 | 0.010 | 0.014 | 0.020 |
| CHO                   | 31   | 0.015  | 0.015 | 0.010 | 0.009 | 0.012 | 0.009 | 0.011 | 0.016 | 0.021 |
| CHF                   | 18   | 0.016  | 0.015 | 0.014 | 0.013 | 0.009 | 0.012 | 0.013 | 0.016 | 0.020 |
| CHNO                  | 17   | 0.146  | 0.061 | 0.028 | 0.037 | 0.043 | 0.032 | 0.043 | 0.028 | 0.040 |
| Bond angles           |      |        |       |       |       |       |       |       |       |       |
| Overall               | 90   | 2.48   | 1.82  | 2.07  | 1.82  | 2.24  | 2.27  | 1.48  | 1.76  | 1.54  |
| CH                    | 32   | 1.61   | 1.01  | 1.74  | 0.76  | 2.14  | 2.33  | 0.64  | 0.90  | 0.49  |
| CHN                   | 20   | 1.62   | 1.19  | 1.00  | 1.53  | 0.96  | 1.08  | 1.39  | 1.44  | 1.35  |
| CHO                   | 20   | 3.47   | 2.08  | 2.44  | 2.33  | 2.31  | 2.12  | 1.79  | 2.33  | 1.98  |
| CHF                   | 11   | 2.59   | 2.38  | 2.06  | 1.43  | 2.35  | 2.18  | 1.45  | 1.47  | 1.11  |
| CHNO                  | 7    | 5.93   | 5.67  | 5.59  | 6.68  | 6.03  | 5.93  | 4.72  | 5.42  | 6.26  |
| Ionization potentials |      |        |       |       |       |       |       |       |       |       |
| Overall               | 104  | 0.59   | 0.49  | 0.39  | 0.50  | 0.42  | 0.42  | 0.40  | 0.33  | 0.53  |
| CH                    | 36   | 0.62   | 0.37  | 0.32  | 0.48  | 0.38  | 0.43  | 0.39  | 0.25  | 0.47  |
| CHN                   | 18   | 0.58   | 0.33  | 0.26  | 0.34  | 0.36  | 0.38  | 0.43  | 0.28  | 0.42  |
| CHO                   | 29   | 0.66   | 0.60  | 0.48  | 0.57  | 0.41  | 0.37  | 0.41  | 0.44  | 0.77  |
| CHF                   | 14   | 0.34   | 0.68  | 0.43  | 0.41  | 0.36  | 0.39  | 0.27  | 0.34  | 0.29  |
| CHNO                  | 5    | 0.70   | 0.67  | 0.46  | 0.78  | 0.64  | 0.59  | 0.59  | 0.47  | 0.55  |
| Dipole moments        |      |        |       |       |       |       |       |       |       |       |
| Overall               | 58   | 0.34   | 0.25  | 0.25  | 0.27  | 0.35  | 0.33  | 0.26  | 0.24  | 0.22  |
| CH                    | 10   | 0.25   | 0.16  | 0.13  | 0.16  | 0.25  | 0.26  | 0.11  | 0.12  | 0.12  |
| CHN                   | 17   | 0.50   | 0.44  | 0.40  | 0.39  | 0.50  | 0.52  | 0.40  | 0.25  | 0.30  |
| CHO                   | 20   | 0.21   | 0.15  | 0.17  | 0.21  | 0.34  | 0.26  | 0.18  | 0.28  | 0.23  |
| CHF                   | 10   | 0.38   | 0.21  | 0.26  | 0.24  | 0.18  | 0.19  | 0.34  | 0.25  | 0.16  |

Table S41: Mean Absolute Errors in Calculated Atomization Enthalpies at 298 K (kcal/mol) for the C7H10O2 Benchmark Set

| Subset  | N    | Method |       |      |      |      |      |      |      |      |
|---------|------|--------|-------|------|------|------|------|------|------|------|
|         |      | MNDO   | AM1   | RM1  | PM3  | PM6  | PM7  | OM1  | OM2  | OM3  |
| Overall | 6095 | 9.27   | 13.43 | 8.07 | 7.92 | 7.26 | 6.44 | 8.92 | 6.30 | 7.67 |

## References

- (S1) Dewar, M. J. S.; Thiel, W. *J. Am. Chem. Soc.* **1977**, *99*, 4899–4907.
- (S2) Sure, R.; Grimme, S. *J. Chem. Theory Comput.* **2015**, *11*, 3785–3801. Correction see:  
*J. Chem. Theory Comput.* **2015**, *11*, 5990–5990.
- (S3) Korth, M.; Thiel, W. *J. Chem. Theory Comput.* **2011**, *7*, 2929–2936.
- (S4) Anacker, T.; Friedrich, J. *J. Comput. Chem.* **2014**, *35*, 634–643.
